# Supplementary material
Source: HighWire-hosted journal article supplement (doi:10.1101/rna.078436.120)
Supplement: Supplemental_File_S1.xlsx [file Supplemental_File_S1.xlsx]

## Sheet: MIQE checklist
Supplemental File S2: MIQE information for RTqPCR
Enwerem et al
ITEM TO CHECK	IMPORTANCE	CHECKLIST
EXPERIMENTAL DESIGN
Definition of experimental and control groups	E	Non-targeting control (NTC) versus RNAi knockdown of CNOT6, CNOT6L, CNOT7 and CNOT8; Nanoluc mRNA expression control (HT overexpression) versus PUM1/2 N-terminus or PUM1/2 repression domain 3
Number within each group	E	3 biological replicates
Assay carried out by core lab or investigator's lab?	D	Investigator's lab
Acknowledgement of authors' contributions	D
SAMPLE
Description	E	HCT116 cells : knockdown and control samples treated with siRNAs; HCT116 cells: transfected with HT control or PUM1/2 N or RD3
Volume/mass of sample processed	D	HCT116 cells (1-2 x10^6 cells) used in RNA isolation
Microdissection or macrodissection	E	n/a (cell culture)
Processing procedure	E	Promega Maxwell SimplyRNA cells kit
If frozen - how and how quickly?	E	cells processed immediately after knockdown incubation using Maxwell RSC SimplyRNA Cells kit (Promega), and lysates either flash frozen in dry ice/EtOH bath and stored at -80 degrees C, or immediately used in RNA isolation
If fixed - with what, how quickly?	E	n/a
Sample storage conditions and duration (especially for FFPE samples)	E	cells processed immediately after knockdown incubation using Maxwell RSC SimplyRNA Cells kit (Promega), and lysates either flash frozen in dry ice/EtOH bath and stored at -80 degrees C, or immediately used in RNA isolation
NUCLEIC ACID EXTRACTION
Procedure and/or instrumentation	E	Maxwell Simply RNA cells (Promega) using Maxwell 16 instrument
Name of kit and details of any modifications	E	Maxwell Simply RNA cells (Promega)
Source of additional reagents used	D	n/a
Details of DNase or RNAse treatment	E	10 µl of DnaseI used per sample from kit
Contamination assessment (DNA or RNA)	E	NoRT control in qPCR
Nucleic acid quantification	E	Nanodrop One
Instrument and method	E	Nanodrop One
Purity (A260/A280)	D
Yield	D
RNA integrity method/instrument	E	RNA quality evaluated with electrophoresis
RIN/RQI or Cq of 3' and 5' transcripts	E	N/A (used gel electrophoresis)
Electrophoresis traces	D
Inhibition testing (Cq dilutions, spike or other)	E	Dilutions (standard curve)
REVERSE TRANSCRIPTION
Complete reaction conditions	E	GoScript (Promega)
Amount of RNA and reaction volume	E	1.6 to 4 µg RNA for RT, and 400 ng to 1 µg noRT (4:1 ratio maintained between RT and noRT); 20 µl reaction volume RT and 5 µl noRT
Priming oligonucleotide (if using GSP) and concentration	E	Random hexamers from 500 ng/µl stock - 50 ng/µl in annealing, 25 ng/µl final in 20 µl
Reverse transcriptase and concentration	E	8 U/µl
Temperature and time	E	42°C for 45 minutes
Manufacturer of reagents and catalogue numbers	D	Promega, catalog #A5004
Cqs with and without RT	D*
Storage conditions of cDNA	D	stored at -20°C
qPCR TARGET INFORMATION
If multiplex, efficiency and LOD of each assay.	E	n/a
Sequence accession number	E	Provided in qPCR primer information table
Location of amplicon	D
Amplicon length	E	Provided in qPCR primer information table
In silico specificity screen (BLAST, etc)	E	NCBI Primer-BLAST (see qPCR primer information table)
Pseudogenes, retropseudogenes or other homologs?	D
Sequence alignment	D
Secondary structure analysis of amplicon	D
Location of each primer by exon or intron (if applicable)	E	Provided in qPCR primer information table
What splice variants are targeted?	E	Provided in qPCR primer information table
qPCR OLIGONUCLEOTIDES
Primer sequences	E	Provided in qPCR primer information table
RTPrimerDB Identification Number	D
Probe sequences	D**
Location and identity of any modifications	E	n/a
Manufacturer of oligonucleotides	D	IDT
Purification method	D
qPCR PROTOCOL
Complete reaction conditions	E	Standard reaction conditions recommended by GoTaq qPCR Master Mix
Reaction volume and amount of cDNA/DNA	E	50 µl reaction volume, 50 ng or 100 ng cDNA per reaction
Primer, (probe), Mg++ and dNTP concentrations	E	0.1 µM each primer, MgCl2 and dNTP concentration proprietary (Promega)
Polymerase identity and concentration	E	GoTaq polymerase (Taq, hot start), concentration proprietary (Promega, does not provide Unit definition)
Buffer/kit identity and manufacturer	E	GoTaq qPCR master mix (Promega)
Exact chemical constitution of the buffer	D	Exact buffer composition proprietary (Promega)
Additives (SYBR Green I, DMSO, etc.)	E	GoTaq qPCR master mix, proprietary dye (Promega)
Manufacturer of plates/tubes and catalog number	D	BioRad, catalogue #HSP9601
Complete thermocycling parameters	E	Reported in Methods section
Reaction setup (manual/robotic)	D	Manual
Manufacturer of qPCR instrument	E	BioRad
qPCR VALIDATION
Evidence of optimisation (from gradients)	D	Standard curves initially performed with Ta 65°C, then gradient or alternative Ta performed if efficiency not between 85-105% (data not shown)
Specificity (gel, sequence, melt, or digest)	E	Melt curves; amplicons were also evaluated using gel electrophoresis
For SYBR Green I, Cq of the NTC	E	Below detection limit (N/A for all primers)
Standard curves with slope and y-intercept	E	Performed standard curves for all primer sets; slope and y-intercept provided in qPCR primer information table
PCR efficiency calculated from slope	E	Efficiencies were between 89.9% and 98.6% and are provided in qPCR primer information table
Confidence interval for PCR efficiency or standard error	D
r2 of standard curve	E	Provided in qPCR primer information table
Linear dynamic range	E	All measurements made within the linear range of detection determined from standard curves
Cq variation at lower limit	E	All assays were performed within the linear range of the standard curve for each primer set
Confidence intervals throughout range	D
Evidence for limit of detection	E	All assays were performed within the linear range of the standard curve for each primer set
If multiplex, efficiency and LOD of each assay.	E	N/A
DATA ANALYSIS
qPCR analysis program (source, version)	E	BioRad CFX Manager v 3.1; Fold change calculations done manually in Microsoft Excel
Cq method determination	E	Pffafl; not all primer sets within 5% efficiency of reference primer set
Outlier identification and disposition	E	N/A
Results of NTCs	E	Ct range (29-33)
Justification of number and choice of reference genes	E	1 (18S) - constituitive ribosomal subunit within desirable Ct range (17-19)
Description of normalisation method	E	RNAi conditions normalized to NTC. Fold change calculated with Pfaffl method
Number and concordance of biological replicates	D	3 biological replicates
Number and stage (RT or qPCR) of technical replicates	E	3 technical replicates, qPCR
Repeatability (intra-assay variation)	E	Triplicate measurements (technical reps), 3 independent trials, SEM
Reproducibility (inter-assay variation, %CV)	D
Power analysis	D
Statistical methods for result significance	E	Standard t-test (2-tailed, paired), reported in Source Data for each relevant figure
Software (source, version)	E	BioRad CFX Manager v 3.1
Cq or raw data submission using RDML	D
Table 1. MIQE checklist for authors, reviewers and editors. All essential information (E) must be submitted with the manuscript. Desirable
information (D) should be submitted if available. If using primers obtained from RTPrimerDB, information on qPCR target, oligonucleotides,
protocols and validation is available from that source.
*: Assessing the absence of DNA using a no RT assay is essential when first extracting RNA. Once the sample has been validated as
RDNA-free, inclusion of a no-RT control is desirable, but no longer essential.
**: Disclosure of the probe sequence is highly desirable and strongly encouraged. However, since not all commercial pre-designed assay
vendors provide this information, it cannot be an essential requirement. Use of such assays is advised against.

## Sheet: qPCR primer information
Target	Primer Name F	Primer Name R	Primer efficiency	Ta used for primer set (°C)	Primer sequence F	Primer sequence R	RefSeq	Amplicon length	Specificity (Primer-BLAST)	Slope	Y-intercept	Coefficient of Determination (R^2)	Location of each primer by exon or intron	What splice variants are targeted?
CNOT6	CNOT6 (10-11)	CNOT6 (10-11)	0.899	60	5' GTTTCTACTCCACCTGTGCTC	5' CTCTCGCAACCTCAAATCCA	NM_015455	126 bp	CNOT6 Only	-3.5889	27.116	0.999	primers span exon-exon junction 10-11	Detects all annotated variants
CNOT6L	CNOT6L (10-11)	CNOT6L (10-11)	0.986	60	5' TTGTCAGCTACTCCTCCATTG	5' -TGCAGATCCTAATTCCATCCC	NM_144571	102 bp	CNOT6L Only	-3.3555	26.291	0.9998	primers span exon-exon junction 10-11	Detects all annotated variants
CNOT7	CNOT7 (5-6)	CNOT7 (5-6)	0.948	65	5' gtcctatccgttccagctcta	5' cgtgtttgcccagtgacg	NM_054026	130 bp	CNOT7 Only	-3.5064	30.533	0.9684	primers span exon-exon junction 5-6	Detects all annotated variants
CNOT8	CNOT8 (6-7)	CNOT8 (6-7)	0.928	65	5' ccacatcctcattctgcttct	5' ctcagactcactgctgacag	NM_004779	140 bp	CNOT8 Only	-3.3443	31.444	0.9849	primer span exon-exon junction 6-7	Detects all annotated variants
18S rRNA	18S For	18S Rev	0.903	65.5	5' cagccacccgagattgagca	5' tagtagcgacgggcggtgtg	NR_003286.4	252 bp	18S Only	-3.5792	8.9433	0.9985	No splice junction	Detects all annotated variants
NLUC	RC318	RC319	0.979	63	5' GTCCTGAGCGGTGAAAATGG	5' CGTAACCCCGTCGATTACCA		177 bp	Nanoluc Only	-3.3737	15.365	0.9988	No splice junction	n/a
