# Supplementary material
Source: HighWire-hosted journal article supplement (doi:10.1101/rna.078436.120)
Supplement: Supplemental_Table_S1.xlsx [file Supplemental_Table_S1.xlsx]

## Sheet: Figure 1
Enwerem et al. Supplemental Table S1
Figure 1D: PUM mediated decay
n=9. 3 experimental replicates, 3 technical repeats
RNAi	Reporter	Log2 Fold Change relative to 3xPREmt	SEM	p-value (rel to NTC)	p-value (rel to mt PRE)
NTC	3xPRE	-1.09667	0.0705366		1.41078e-07
PUM1&2	3xPRE	0.374689	0.0463007	6.54283e-09	3.03604e-05
CNOT1	3xPRE	-0.0867459	0.0927973	0.000103128	0.459713
NTC	3xPREmt	-0.000594322	0.0130881
PUM1&2	3xPREmt	-0.00137914	0.0199067
CNOT1	3xPREmt	-0.00423196	0.0350175
Figure 1F: CNOT7 and CNOT8 RNAi validation with RT-qPCR
n=9. 3 experimental replicates, 3 technical repeats
RNAi	Target	Log2 Fold Change relative to NTC	SEM	p-value (rel to NTC)
PUM1&2	CNOT7	0.43844	0.172382	0.173455
CNOT7&8	CNOT7	-4.41083	0.179653	0.00247916
PUM1&2	CNOT8	0.278342	0.144276	0.25589
CNOT7&8	CNOT8	-3.59164	0.201392	0.00468308
Figure 1G: PUM mediated decay
n=9. 3 experimental replicates, 3 technical repeats
RNAi	Reporter	Log2 Fold Change relative to 3xPREmt	SEM	p-value (rel to NTC)	p-value (rel to mt PRE)
NTC	3xPRE	-1.02237	0.0788027		2.96105e-06
PUM1&2	3xPRE	0.535867	0.104275	2.46515e-07	0.00116944
CNOT7&8	3xPRE	0.0540314	0.109814	3.12928e-06	0.636929
NTC	3xPREmt	-0.00319949	0.0322045
PUM1&2	3xPREmt	-0.00690397	0.0464694
CNOT7&8	3xPREmt	-0.00356167	0.033476
Figure 1I: CNOT6 and CNOT6L RNAi validation with RT-qPCR
n=9. 3 experimental replicates, 3 technical repeats
RNAi	Target	Log2 Fold Change relative to NTC	SEM	p-value (rel to NTC)
PUM1&2	CNOT6	0.0994426	0.131198	0.599098
CNOT6&6L	CNOT6	-2.03687	0.314478	0.0339457
PUM1&2	CNOT6L	0.206936	0.237043	0.549916
CNOT6&6L	CNOT6L	-1.78123	0.30888	0.0422664
Figure 1J: PUM mediated decay
n=9. 3 experimental replicates, 3 technical repeats
RNAi	Reporter	Log2 Fold Change relative to 3xPREmt	SEM	p-value (rel to NTC)	p-value (rel to mt PRE)
NTC	3xPRE	-1.18884	0.117937		1.26746e-05
PUM1&2	3xPRE	0.482086	0.102102	3.38081e-07	0.00189861
CNOT6&6L	3xPRE	-0.990782	0.0750038	0.0109599	1.68476e-06
NTC	3xPREmt	-0.00153047	0.0223405
PUM1&2	3xPREmt	-0.000989251	0.017894
CNOT6&6L	3xPREmt	-0.000482148	0.0124566

## Sheet: Figure 2
Figure 2B: PAC-Seq KD verification
n=3 biological replicates
RNAi	mRNA	Log2 Fold Change relative to NTC	SEM	p-value (rel to NTC)
PUM1	PUM1	-1.57371	0.144667	0.0124399
PUM2	PUM2	-2.07696	0.144716	0.00720374
PUM1&2	PUM1	-1.41921	0.0398143	0.00117844
PUM1&2	PUM2	-2.38274	0.208296	0.0112696
CNOT1	CNOT1	-2.13838	0.101615	0.00337006
CNOT7&8	CNOT7	-4.4871	0.0767808	0.000438914
CNOT7&8	CNOT8	-2.54462	0.155514	0.00555589

## Sheet: Figure 3
Figure 3C: Altered Specificity PUM FL and RBD
n=9. 3 experimental replicates, 3 biological repeats
Effector	Log2 Fold Change relative to HT	SEM	p-value (rel to HT)	p-value (RBD rel to FL)
HT	0	0.0250235
PUM1 FL	-1.56	0.0417617	8.10924e-10
PUM1 RBD	-0.99	0.0481959	6.13295e-08	1.23202e-08
PUM2 FL	-1.8	0.0500455	7.13466e-11
PUM2 RBD	-0.95	0.071718	1.43054e-06	5.62002e-07
Figure 3E: Altered Specificity PUM1 RBD titration
n=9. 3 experimental replicates, 3 biological repeats
Effector	Log2 Fold Change relative to HT	SEM	p-value (rel to HT)	p-value (RBD rel to FL)
HT	0	0.0276289
PUM1 FL	-1.56	0.0258904	1.65458e-10
PUM1 RBD 1ng	-0.28	0.0388635	6.7658e-05	7.74347e-10
PUM1 RBD 5ng	-0.23	0.0459975	0.000142322	6.7889e-10
PUM1 RBD 10ng	-0.28	0.0529545	0.00235081	2.0191e-08
PUM1 RBD 20ng	-0.32	0.0435381	2.27695e-05	3.98541e-10
PUM1 RBD 40ng	-0.45	0.0719422	0.000375837	9.65865e-08
PUM1 RBD 85ng	-1.1	0.0452728	5.99746e-09	5.97446e-07
Figure 3G: Altered Specificity PUM2 RBD titration
n=9. 3 experimental replicates, 3 biological repeats
Effector	Log2 Fold Change relative to HT	SEM	p-value (rel to HT)	p-value (RBD rel to FL)
HT	0	0.0237373
PUM2 FL	-2.07	0.0299899	9.37442e-13
PUM2 RBD 1ng	-0.42	0.0543023	8.92136e-05	2.14443e-10
PUM2 RBD 5ng	-0.39	0.0458206	3.21278e-05	2.9493e-11
PUM2 RBD 10ng	-0.5	0.0545844	1.94804e-05	2.97301e-10
PUM2 RBD 20ng	-0.51	0.0553968	1.98271e-05	1.65863e-10
PUM2 RBD 40ng	-0.68	0.0363434	1.67916e-08	3.91375e-13
PUM2 RBD 85ng	-1.14	0.0439025	1.13081e-08	1.65994e-08

## Sheet: Figure 4
Figure 4C: Tethered function, specificty of effectors
Normalized to HT control on respective reporter
n=9. 3 experimental replicates, 3 biological repeats
Reporter	MS2 Effector	Log2 Fold Change relative to HT	SEM	p-value (rel to HT ΔMS2)	p-value (corresponding effector on ΔMS2)
ΔMS2	HT	0	0.0478584
ΔMS2	CNOT7	-0.28	0.0520211	0.000501236
ΔMS2	PUM1 N	0.32	0.0284719	0.000113688
ΔMS2	PUM2 N	0.18	0.0527381	0.00258195
4xMS2	HT	0	0.0436082	0.985226	0.985226
4xMS2	CNOT7	-3.12	0.0250643	2.55793e-11	1.53592e-10
4xMS2	PUM1 N	-2.74	0.0550456	3.50851e-11	9.4839e-12
4xMS2	PUM2 N	-2.28	0.0650098	3.48929e-09	1.61108e-09
Figure 4C: Tethered function, specificty of effectors
Normalized to HT control on ΔMS2
n=9. 3 experimental replicates, 3 biological repeats
Reporter	MS2 Effector	Log2 Fold Change relative to HT	SEM	p-value (rel to HT control on ΔMS2 )
4xMS2	HT	-0.56	0.243199	0.0673553
4xMS2	CNOT7	-3.67	0.228835	4.64598e-07
4xMS2	PUM1 N	-3.29	0.261619	2.441e-06
4xMS2	PUM2 N	-2.84	0.237034	4.14469e-06
Figure 4E: Northern quantification
Northern signal relative to HT control
n=3 biological repeats
Reporter	MS2 Effector	Log2 Fold Change relative to HT	SEM	p-value (rel to HT control)
4xMS2	PUM1 N	-0.923599	-1.87345	0.00736264
4xMS2	PUM2 N	0.0212196	0.0620563	0.00336412
Figure 4F: Tethered function with CNOT7 and 8 dominant mutant OE
Normalized to HT control in respective condition
n=9. 3 experimental replicates, 3 biological repeats
control/CNOT78mutants OE	MS2 Effector	Log2 Fold Change relative to HT	SEM	p-value (rel to HT in respective condition)	p-value (corresponding effector in control condition)
control	HT	0	0.0157776
CNOT7&8 mutants	HT	0	0.0199601		0.986387
control	CNOT7	-2.97	0.0580364	3.92316e-11
CNOT7&8 mutants	CNOT7	-2.66	0.0425809	2.61178e-11	0.00437255
control	PUM1 N	-2.59	0.0361175	9.39023e-12
CNOT7&8 mutants	PUM1 N	-0.72	0.0257685	7.04178e-08	4.06667e-11
control	PUM2 N	-2.09	0.113454	1.37729e-07
CNOT7&8 mutants	PUM2 N	-0.76	0.0202763	3.36168e-08	4.5791e-06

## Sheet: Figure 5
Figure 5A: Tethered function, PUM1 and 2 domains
Normalized to HT control
n=9. 3 experimental replicates, 3 biological repeats
MS2 Effector	Log2 Fold Change relative to NTC	SEM	p-value (rel to HT control)
HT	0	0.0314121
CNOT7	-3.26	0.0343611	1.88483e-12
PUM1 N	-1.84	0.101158	1.15744e-07
PUM1 RD1	-0.83	0.0426565	6.74099e-08
PUM1 RD2	-0.22	0.0648836	0.012128
PUM1 RD3	-2.57	0.106142	1.64132e-08
PUM1 RBD	-0.29	0.107122	0.0371495
PUM2 N	-3.11	0.0480955	1.4056e-11
PUM2 RD2	-0.41	0.0679168	0.000483496
PUM2 RD3	-3.29	0.0697986	6.68011e-11
PUM2 RBD	-0.45	0.0885907	0.00179895
Figure 5C: Tethered function, PUM1 RD3 titration
n=9. 3 experimental replicates, 3 biological repeats
MS2 Effector	Log2 Fold Change relative to HT	SEM	p-value (rel to HT control)
HT	0	0.0314121
CNOT7	-3.26	0.0343611	1.88483e-12
PUM1 N	-1.84	0.101158	1.15744e-07
PUM1 RD1	-0.83	0.0426565	6.74099e-08
PUM1 RD2	-0.22	0.0648836	0.012128
PUM1 RD3 1ng	-2.57	0.106142	1.64132e-08
PUM1 RD3 5ng	-0.29	0.107122	0.0371495
PUM1 RD3 10ng	-3.11	0.0480955	1.4056e-11
PUM1 RD3 20ng	-0.41	0.0679168	0.000483496
PUM1 RD3 45ng	-3.29	0.0697986	6.68011e-11
PUM1 RD3 85ng	-0.45	0.0885907	0.00179895
Figure 5E: Tethered function, qRT-PCR RNA Decay analysis
n=9. 3 experimental replicates, 3 biological repeats
MS2 Effector	Log2 Fold Change relative to HT	SEM	p-value (rel to HT control)
HT	0	0.0665961
PUM1 N	-2.73	0.112347	7.29691e-11
PUM1 RD3	-3.01	0.0852975	1.08847e-13
PUM2 N	-3.48	0.145382	8.67425e-10
PUM2 RD3	-3.6	0.0898298	5.46878e-13

## Sheet: Figure 7
Figure 7B: Tethered function, pA vs MALAT1
Normalized to HT control on respective reporter
n=9. 3 experimental replicates, 3 biological repeats
Reporter	MS2 Effector	Log2 Fold Change relative to HT	SEM	p-value (rel to HT on each respective reporter)	p-value (corresponding effector on pA reporter)
pA	HT	0	0.0184541
MALAT1	HT	0	0.0305373		0.947163
pA	CNOT7	-3.49	0.0333339	1.53886e-13
MALAT1	CNOT7	-1.56	0.0588744	1.29559e-08	2.56689e-11
pA	PUM1 N	-2.42	0.0453538	8.89538e-11
MALAT1	PUM1 N	-1.44	0.0530306	1.62155e-08	1.45546e-07
pA	PUM2 N	-3.45	0.0487626	2.5792e-12
MALAT1	PUM2 N	-2.59	0.0500047	5.56749e-12	2.2014e-06
Figure 7D: Tethered function, pA and MALAT1 reporters with DCP2 dominant mutant OE
Normalized to HT control in respective condition
n=9. 3 experimental replicates, 3 biological repeats
control/CNOT78mutants OE	Reporter	MS2 Effector	Log2 Fold Change relative to HT	SEM	p-value (rel to HT in respective condition)	p-value (corresponding effector in control condition)
control	pA	HT	-0.00151518	0.0219173
DCP2 mutant	pA	HT	-0.00252984	0.0285953		0.983937
control	pA	CNOT7	-2.24528	0.0174414	8.45722e-13
DCP2 mutant	pA	CNOT7	-1.75436	0.0459489	1.64501e-09	1.62759e-06
control	pA	PUM1 N	-1.92512	0.0607793	2.19648e-09
DCP2 mutant	pA	PUM1 N	-1.61845	0.052314	3.66413e-10	0.0205414
control	pA	PUM2 N	-1.1866	0.106452	3.44031e-06
DCP2 mutant	pA	PUM2 N	-0.511945	0.0912802	0.00102106	9.48058e-05
control	MALAT1	HT	-0.000332565	0.0103531
DCP2 mutant	MALAT1	HT	-0.00154811	0.0224482		0.967602
control	MALAT1	CNOT7	-1.38268	0.0473077	1.86214e-09
DCP2 mutant	MALAT1	CNOT7	-1.076	0.0269828	6.51838e-10	0.00158641
control	MALAT1	PUM1 N	-1.05229	0.0435736	1.40867e-08
DCP2 mutant	MALAT1	PUM1 N	-0.497734	0.0178389	1.52715e-08	7.24222e-06
control	MALAT1	PUM2 N	-0.696634	0.0284341	3.61228e-08
DCP2 mutant	MALAT1	PUM2 N	-0.101488	0.035909	0.0515302	3.10084e-06

## Sheet: Figure S1
Figure S1B: PUM mediated decay
n=9. 3 experimental replicates, 3 technical repeats
RNAi	Reporter	Log2 Fold Change relative to 3xPREmt	SEM	p-value (rel to NTC)	p-value (rel to mt PRE)
NTC	3xPRE	-1.35893	0.0265202		9.07563e-11
PUM1&2	3xPRE	0.172737	0.0229212	3.36709e-10	0.000459529
CNOT2	3xPRE	-1.15569	0.0512136	0.0305888	1.32296e-07
CNOT3	3xPRE	-1.26135	0.0527037	0.061253	2.07125e-08
NTC	3xPREmt	-0.000993407	0.0178534
PUM1&2	3xPREmt	-0.00066295	0.0145375
CNOT2	3xPREmt	-0.0020523	0.0256911
CNOT3	3xPREmt	-0.000648396	0.0143839
Figure S1D: PUM mediated decay
n=9. 3 experimental replicates, 3 technical repeats
RNAi	Reporter	Log2 Fold Change relative to 3xPREmt	SEM	p-value (rel to NTC)	p-value (rel to mt PRE)
NTC 3xPRE	3xPRE	-1.18794	0.0464733		1.78445e-08
PUM1&2 3xPRE	3xPRE	0.124615	0.0683742	3.59558e-09	0.1199
CNOT9 3xPRE	3xPRE	-1.23997	0.0450132	0.0592494	7.56189e-08
NTC 3xPRE	3xPREmt	-0.000626043	0.0141608
PUM1&2 3xPRE	3xPREmt	-0.00382685	0.0352138
CNOT9 3xPRE	3xPREmt	-0.00491623	0.0392988
Figure S1F: PUM mediated decay
n=9. 3 experimental replicates, 3 technical repeats
RNAi	Reporter	Log2 Fold Change relative to 3xPREmt	SEM	p-value (rel to NTC)	p-value (rel to mt PRE)
NTC 3xPRE	3xPRE	-1.05478	0.0550209		1.00158e-07
PUM1&2 3xPRE	3xPRE	0.151158	0.0934046	5.80951e-08	0.143482
CNOT10 3xPRE	3xPRE	-0.922613	0.0911039	0.0650009	1.49047e-05
CNOT11 3xPRE	3xPRE	-1.24669	0.131378	0.133533	2.05512e-05
NTC 3xPRE	3xPREmt	-0.000855533	0.0166354
PUM1&2 3xPRE	3xPREmt	-0.0032573	0.032266
CNOT10 3xPRE	3xPREmt	-0.00244364	0.0280309
CNOT11 3xPRE	3xPREmt	-0.00276134	0.0299456

## Sheet: Figure S3
Figure S3A: Altered Specificity cap binding motif
n=9. 3 experimental replicates, 3 biological repeats
Effector	Log2 Fold Change relative to HT	SEM	p-value (rel to HT)	p-value (mutant rel to WT)
HT	0	0.0142443
PUM1 WT	-1.61	0.0343388	1.09604e-10
PUM1 W466G	-1.63	0.0206761	1.13484e-12	0.670792
PUM2 WT	-1.99	0.0621995	1.77446e-09
PUM2 W350G	-2.26	0.0234138	6.56402e-13	0.000614504

## Sheet: Figure S5
Figure S5: Altered Specificity of PUM1 disease associated mutations
n=9. 3 experimental replicates, 3 biological repeats
Effector	Log2 Fold Change relative to HT	SEM	p-value (rel to HT)	p-value (mutants rel to WT)
HT	0	0.0300573
PUM1 WT FL	-1.59	0.0556527	4.19128e-09
PUM1 T1035S FL	-1.42	0.0558164	1.85849e-08	5.69562e-05
PUM1 R1139W FL	-1.48	0.0403224	5.24293e-10	0.006079
PUM1 R1147W FL	-1.47	0.0781804	1.17091e-07	0.0239244
PUM1 WT RBD	-1.13	0.0601413	1.04753e-07
PUM1 T1035S RBD	-0.1	0.0610546	3.01168e-07	0.0211639
PUM1 R1139W RBD	-1.08	0.0646476	2.33318e-07	0.223535
PUM1 R1147W RBD	-1.13	0.0376658	3.53753e-09	0.933484
