# Supplementary material
Source: HighWire-hosted journal article supplement (doi:10.1101/rna.078436.120)
Supplement: Supplemental_Table_S2.xlsx [file Supplemental_Table_S2.xlsx]

## Sheet: Legend
Supplemental Table S2 PAC-Seq Differential Expression Analysis
Enwerem et al.
Conditions:
Non-targeting Control (NTC)
PUM1 RNAi
PUM2 RNAi
CNOT1 RNAi
CNOT7&8 RNAi
Definitions of acryonyms in tables: Differential Expression (DE), Alternative Poly-Adenylation (APA), Poly(A) Cluster (PAC), Adjusted p value (pAdj), Percent Distal poly(A) site usage (PDU)

## Sheet: PUM1 RNAi
PUM1 RNAi PAC-Seq Differential Expression Analysis
Sort Refresh	Gene Name	Mean Counts NTC RNAi	Mean Counts PUM1 RNAi	Fold Change	pAdj	DE Result	Any Splicing APA?	Any Tandem APA?	#Exons with a PAC	Exon Names	Exon fraction NTC RNAi	Exon fraction PUM1 RNAi	Exon Fraction Change	Exon Results (NA = Not significant)	#PACs per Exon	PDU per Exon NTC RNAi	PDU per Exon PUM1 RNAi	delta-PDU per Exon	PAC Changes
1	WASH7P	581.011	594.16	0.0328	1	NC	No	No	1	WASH7P_exon_chr1:14501	1	1	0	NA	2	30.6	31.95	1.35	NA
2	AL627309.6	19.9527	23.4725	0.2356	1	NC	No	No	1	AL627309.6_exon_chr1:135895	1	1	0	NA	1
3	AP006222.1	28.1236	29.7108	-0.0046	1	NC	No	No	1	AP006222.1_exon_chr1:259025	1	1	0	NA	3	16.7	21.21	4.5	NA
4	AL669831.3	41.4957	39.2208	-0.0143	1	NC	No	No	2	AL669831.3_exon_chr1:594756	0.3118	0.2323	-0.0796	NA	1
5	AL669831.3									AL669831.3_exon_chr1:633129	0.6882	0.7677	0.0796	NA	1
6	MTND1P23	71673.5	88128.2	0.298	0.000655135	NC	No	No	1	MTND1P23_exon_chr1:629061	1	1	0	NA	13	29.89	29.84	-0.05	NA
7	MTATP6P1	99634.8	110759	0.1527	0.0627419	NC	No	No	1	MTATP6P1_exon_chr1:631073	1	1	0	NA	27	30.01	29.61	-0.39	NA
8	AC114498.2	226.163	225.09	0.0013	1	NC	No	No	1	AC114498.2_exon_chr1:632413	1	1	0	NA	2	84.7	85.81	1.11	NA
9	AL669831.1	35.6322	34.2537	0.0303	1	NC	No	No	1	AL669831.1_exon_chr1:729804	1	1	0	NA	2	59.38	61.21	1.83	NA
10	LINC01128	35.7406	43.9845	0.3246	1	NC	No	No	2	LINC01128_exon_chr1:841199	0.2338	0.1539	-0.0799	NA	4	85.36	85.53	0.17	NA
11	LINC01128									LINC01128_exon_chr1:853390	0.7662	0.8461	0.0799	NA	6	28.18	28.05	-0.13	NA
12	LINC02593	13.32	9.4431	-0.5431	1	NC	No	No	1	LINC02593_exon_chr1:921016	1	1	0	NA	1
13	NOC2L	498.866	485.378	-0.0355	0.9352	NC	No	No	1	NOC2L_exon_chr1:944800	1	1	0	NA	1
14	SAMD11	16.3716	10.5216	-0.6009	1	NC	No	No	1	SAMD11_exon_chr1:943697	1	1	0	NA	1
15	KLHL17	134.723	113.167	-0.2303	0.653126	NC	No	No	1	KLHL17_exon_chr1:964962	1	1	0	NA	1
16	PLEKHN1	40.2184	52.3043	0.4238	0.672196	NC	No	No	1	PLEKHN1_exon_chr1:974441	1	1	0	NA	3	70.23	75.63	5.39	NA
17	AL645608.7	12.4488	17.3649	0.407	1	NC	No	No	1	AL645608.7_exon_chr1:998051	1	1	0	NA	1
18	HES4	60.9413	63.8607	0.0853	1	NC	No	No	1	HES4_exon_chr1:999432	1	1	0	NA	1
19	ISG15	2984.29	2813.58	-0.0893	0.35137	NC	No	No	1	ISG15_exon_chr1:1013983	1	1	0	NA	1
20	AGRN	363.19	379.401	0.0507	0.945852	NC	No	No	1	AGRN_exon_chr1:1054823	1	1	0	NA	1
21	AL390719.1	32.2065	42.8892	0.3753	1	NC	No	No	1	AL390719.1_exon_chr1:1065829	1	1	0	NA	2	62.45	59.65	-2.79	NA
22	RNF223	24.5401	15.7324	-0.7087	1	NC	No	No	1	RNF223_exon_chr1:1072575	1	1	0	NA	2	72.8	74.34	1.55	NA
23	C1orf159	172.008	166.386	-0.0573	1	NC	No	No	1	C1orf159_exon_chr1:1084506	1	1	0	NA	1
24	AL390719.2	19.9798	17.5799	-0.1211	1	NC	No	No	1	AL390719.2_exon_chr1:1169356	1	1	0	NA	1
25	TNFRSF18	316.239	321.658	0.0315	0.882796	NC	No	No	1	TNFRSF18_exon_chr1:1203968	1	1	0	NA	1
26	SDF4	786.018	786.58	-0.0156	0.802638	NC	No	No	1	SDF4_exon_chr1:1217804	1	1	0	NA	1
27	B3GALT6	114.812	124.904	0.1005	0.921285	NC	No	No	1	B3GALT6_exon_chr1:1232236	1	1	0	NA	4	67.69	71.9	4.21	NA
28	C1QTNF12	9.3319	6.1727	-0.4877	1	NC	No	No	1	C1QTNF12_exon_chr1:1242646	1	1	0	NA	1
29	UBE2J2	172.933	193.815	0.1297	0.77239	NC	No	No	1	UBE2J2_exon_chr1:1255487	1	1	0	NA	3	15.39	16.63	1.24	NA
30	SCNN1D	33.0569	34.5904	0.0513	1	NC	No	No	1	SCNN1D_exon_chr1:1291253	1	1	0	NA	1
31	ACAP3	43.2516	42.0252	-0.0795	1	NC	No	No	1	ACAP3_exon_chr1:1293708	1	1	0	NA	1
32	INTS11	630.48	644.727	0.028	0.784166	NC	No	No	1	INTS11_exon_chr1:1315697	1	1	0	NA	1
33	PUSL1	270.263	269.877	0.0091	1	NC	No	No	1	PUSL1_exon_chr1:1311329	1	1	0	NA	1
34	AL139287.1	55.0797	49.2218	-0.1178	1	NC	No	No	2	AL139287.1_exon_chr1:1317899	0.2228	0.1764	-0.0464	NA	2	93.03	85.37	-7.66	NA
35	AL139287.1									AL139287.1_exon_chr1:1321096	0.7772	0.8236	0.0464	NA	1
36	CPTP	90.8426	113.548	0.2896	0.4697	NC	No	No	1	CPTP_exon_chr1:1327240	1	1	0	NA	1
37	DVL1	215.314	247.181	0.2114	0.393853	NC	No	No	1	DVL1_exon_chr1:1336515	1	1	0	NA	1
38	AURKAIP1	685.851	677.817	-0.0236	0.78722	NC	No	No	1	AURKAIP1_exon_chr1:1373902	1	1	0	NA	1
39	CCNL2	208.461	211.962	0.027	1	NC	No	No	2	CCNL2_exon_chr1:1387582	0.7787	0.8167	0.038	NA	6	49.49	50.27	0.78	NA
40	CCNL2									CCNL2_exon_chr1:1392803	0.2213	0.1833	-0.038	NA	5	12.64	17.47	4.84	NA
41	MRPL20-AS1	82.6083	66.1644	-0.3239	0.849238	NC	No	No	1	MRPL20-AS1_exon_chr1:1399519	1	1	0	NA	1
42	MRPL20	894.328	877.239	-0.0321	0.75193	NC	No	No	1	MRPL20_exon_chr1:1402601	1	1	0	NA	2	83.01	83.41	0.4	NA
43	VWA1	140.475	133.752	-0.095	0.930745	NC	No	No	1	VWA1_exon_chr1:1439080	1	1	0	NA	2	8.8	8.45	-0.35	NA
44	ATAD3B	197.569	235.002	0.2265	0.40748	NC	No	No	1	ATAD3B_exon_chr1:1495484	1	1	0	NA	1
45	ATAD3A	652.785	585.669	-0.175	0.259952	NC	No	No	1	ATAD3A_exon_chr1:1533925	1	1	0	NA	1
46	SSU72	507.728	436.018	-0.2124	0.225202	NC	No	No	2	SSU72_exon_chr1:1542167	0.8745	0.894	0.0195	NA	1
47	SSU72									SSU72_exon_chr1:1564916	0.1255	0.106	-0.0195	NA	6	71.5	65.2	-6.3	NA
48	FNDC10	42.6277	42.4296	-0.0401	1	NC	No	No	1	FNDC10_exon_chr1:1600135	1	1	0	NA	1
49	MIB2	196.599	205.42	0.0304	1	NC	No	No	2	MIB2_exon_chr1:1616273	0.0816	0.0475	-0.0342	NA	1
50	MIB2									MIB2_exon_chr1:1630291	0.9184	0.9525	0.0342	NA	1
51	CDK11B	1466.79	1515.08	0.0355	0.742215	NC	No	No	5	CDK11B_exon_chr1:1635856	0.0717	0.0949	0.0232	NA	2	51.95	44.47	-7.48	NA
52	CDK11B									CDK11B_exon_chr1:1641113	0.1822	0.1442	-0.038	NA	1
53	CDK11B									CDK11B_exon_chr1:1642508	0.237	0.2386	0.0016	NA	1
54	CDK11B									CDK11B_exon_chr1:1649637	0.2079	0.2182	0.0102	NA	3	14.46	15.98	1.52	NA
55	CDK11B									CDK11B_exon_chr1:1652566	0.2604	0.2473	-0.0131	NA	1
56	SLC35E2B	86.6763	108.82	0.3002	0.423987	NC	No	No	2	SLC35E2B_exon_chr1:1660111	0.16	0.1892	0.0293	NA	1
57	SLC35E2B									SLC35E2B_exon_chr1:1666019	0.84	0.8108	-0.0293	NA	5	82.4	84.69	2.28	NA
58	AL031282.2	104.402	139.086	0.4485	0.108391	NC	No	No	1	AL031282.2_exon_chr1:1705025	1	1	0	NA	2	54.24	46.53	-7.71	NA
59	CDK11A	846.565	915.168	0.1018	0.411712	NC	No	No	3	CDK11A_exon_chr1:1708245	0.3272	0.3159	-0.0113	NA	1
60	CDK11A									CDK11A_exon_chr1:1709640	0.4213	0.4152	-0.0062	NA	1
61	CDK11A									CDK11A_exon_chr1:1719455	0.1438	0.1498	0.006	NA	3	89.44	78.59	-10.85	NA
62	SLC35E2A	95.6007	122.146	0.3455	0.313744	NC	No	No	2	SLC35E2A_exon_chr1:1725422	0.1371	0.1686	0.0314	NA	1
63	SLC35E2A									SLC35E2A_exon_chr1:1732523	0.8629	0.8314	-0.0314	NA	1
64	NADK	120.386	124.969	0.0234	1	NC	No	No	1	NADK_exon_chr1:1753060	1	1	0	NA	3	53.96	57.75	3.79	NA
65	GNB1	1703.6	1794.73	0.0738	0.508901	NC	No	No	1	GNB1_exon_chr1:1787053	1	1	0	NA	4	90.66	90.58	-0.09	NA
66	TMEM52	109.106	100.466	-0.159	1	NC	No	No	1	TMEM52_exon_chr1:1919279	1	1	0	NA	1
67	CFAP74	10.8645	14.8306	0.5035	1	NC	No	No	2	CFAP74_exon_chr1:1985112	0.1659	0.325	0.1591	NA	1
68	CFAP74									CFAP74_exon_chr1:1988133	0.8341	0.675	-0.1591	NA	1
69	GABRD	70.0933	68.7412	-0.012	1	NC	No	No	2	GABRD_exon_chr1:2025517	0.0679	0.0571	-0.0108	NA	1
70	GABRD									GABRD_exon_chr1:2029550	0.9321	0.9429	0.0108	NA	1
71	FAAP20	273.753	255.099	-0.1043	0.783633	NC	No	No	2	FAAP20_exon_chr1:2185513	0.2042	0.1322	-0.072	NA	1
72	FAAP20									FAAP20_exon_chr1:2193910	0.7958	0.8678	0.072	NA	6	93.15	88.73	-4.42	NA
73	PRKCZ	152.107	142.473	-0.0926	1	NC	No	No	1	PRKCZ_exon_chr1:2184921	1	1	0	NA	1
74	SKI	135.038	154.804	0.1657	0.816245	NC	No	No	1	SKI_exon_chr1:2306576	1	1	0	NA	6	49.81	49.98	0.18	NA
75	RER1	388.963	398.544	0.05	0.898638	NC	No	No	1	RER1_exon_chr1:2403034	1	1	0	NA	5	26.48	26.91	0.43	NA
76	PEX10	95.2682	67.0059	-0.5104	0.212874	NC	No	No	1	PEX10_exon_chr1:2405834	1	1	0	NA	4	64.65	52.01	-12.64	NA
77	PLCH2	15.2772	14.6596	0.0281	1	NC	No	No	2	PLCH2_exon_chr1:2499640	0.5	0.5	0	NA	1
78	PLCH2									PLCH2_exon_chr1:KI270762v1	0.5	0.5	0	NA	1
79	PANK4	70.7074	85.3537	0.2326	1	NC	No	No	2	PANK4_exon_chr1:2509060	0.5078	0.5007	-0.0071	NA	1
80	PANK4									PANK4_exon_chr1:KI270762v1	0.4922	0.4993	0.0071	NA	1
81	AL139246.5	5.7906	6.3572	0.1663	1	NC	No	No	1	AL139246.5_exon_chr1:2545968	1	1	0	NA	1
82	PRXL2B	154.84	165.414	0.1103	0.843891	NC	No	No	2	PRXL2B_exon_chr1:2589409	0.4988	0.5	0.0012	NA	1
83	PRXL2B									PRXL2B_exon_chr1:KI270762v1	0.5012	0.5	-0.0012	NA	1
84	PRDM16-DT	14.4806	8.9662	-0.6025	1	NC	No	No	1	PRDM16-DT_exon_chr1:3064302	1	1	0	NA	2	16.89	4.42	-12.47	NA
85	PRDM16	12.0274	14.1357	0.3039	1	NC	No	No	1	PRDM16_exon_chr1:3433676	1	1	0	NA	4	35.17	39.14	3.97	NA
86	ARHGEF16	491.526	442.535	-0.17	0.370768	NC	No	No	1	ARHGEF16_exon_chr1:3480447	1	1	0	NA	1
87	MEGF6	63.8749	59.1796	-0.057	1	NC	No	No	1	MEGF6_exon_chr1:3490589	1	1	0	NA	3	51.18	59.36	8.18	NA
88	TPRG1L	323.566	354.276	0.1458	0.450169	NC	No	No	1	TPRG1L_exon_chr1:3628408	1	1	0	NA	1
89	WRAP73	111.701	129.258	0.1864	0.694132	NC	No	No	2	WRAP73_exon_chr1:3637098	0.8824	0.9555	0.0732	NA	1
90	WRAP73									WRAP73_exon_chr1:3647560	0.1176	0.0445	-0.0732	NA	1
91	TP73	99.149	101.27	0.0164	1	NC	No	No	1	TP73_exon_chr1:3732746	1	1	0	NA	2	56.76	50.63	-6.13	NA
92	SMIM1	7.2818	5.6697	-0.4188	1	NC	No	No	1	SMIM1_exon_chr1:3775298	1	1	0	NA	1
93	LRRC47	334.456	304.349	-0.1161	0.598109	NC	No	No	1	LRRC47_exon_chr1:3781336	1	1	0	NA	1
94	CEP104	148.121	200.903	0.4483	0.0239856	UP	No	No	1	CEP104_exon_chr1:3815517	1	1	0	NA	6	20.55	16.04	-4.51	NA
95	DFFB	27.569	34.8826	0.3888	1	NC	No	No	1	DFFB_exon_chr1:3883506	1	1	0	NA	1
96	C1orf174	145.329	137.004	-0.08	0.977921	NC	No	No	1	C1orf174_exon_chr1:3890073	1	1	0	NA	1
97	MIR4689	13.7653	11.4631	-0.22	1	NC	No	No	1	MIR4689_exon_chr1:5866458	1	1	0	NA	1
98	KCNAB2	89.2956	86.2608	-0.0765	1	NC	No	No	1	KCNAB2_exon_chr1:6097268	1	1	0	NA	1
99	CHD5	26.0826	20.3366	-0.3284	1	NC	No	No	1	CHD5_exon_chr1:6105427	1	1	0	NA	2	65.27	80.39	15.11	NA
100	AL031847.2	123.541	98.9205	-0.2878	0.434978	NC	No	No	1	AL031847.2_exon_chr1:6159515	1	1	0	NA	1
101	RPL22	10574.5	10280.9	-0.0394	0.555824	NC	No	No	1	RPL22_exon_chr1:6186816	1	1	0	NA	9	34.17	34.84	0.67	NA
102	RNF207	72.9688	98.0194	0.4209	0.438689	NC	No	No	1	RNF207_exon_chr1:6219235	1	1	0	NA	3	33.39	24.03	-9.36	NA
103	ICMT	389.335	347.579	-0.1369	0.486054	NC	No	No	1	ICMT_exon_chr1:6225262	1	1	0	NA	6	20.75	22.71	1.96	NA
104	LINC00337	25.8127	28.2642	0.1189	1	NC	No	No	1	LINC00337_exon_chr1:6238220	1	1	0	NA	2	84.81	79.02	-5.79	NA
105	GPR153	26.5471	37.7337	0.4695	1	NC	No	No	1	GPR153_exon_chr1:6250003	1	1	0	NA	1
106	ACOT7	1490.54	1478.43	-0.0202	0.84657	NC	No	No	1	ACOT7_exon_chr1:6264695	1	1	0	NA	1
107	HES2	41.0923	53.2733	0.3134	0.921189	NC	No	No	2	HES2_exon_chr1:6413282	0.0184	0.0898	0.0713	NA	1
108	HES2									HES2_exon_chr1:6419340	0.9816	0.9102	-0.0713	NA	4	32.4	21.6	-10.79	NA
109	ESPN	142.883	128.823	-0.1747	0.705341	NC	No	No	2	ESPN_exon_chr1:6454433	0.1633	0.2175	0.0542	NA	1
110	ESPN									ESPN_exon_chr1:6459996	0.8367	0.7825	-0.0542	NA	3	43.94	43.91	-0.03	NA
111	TNFRSF25	189.939	200.989	0.0823	0.900788	NC	No	No	1	TNFRSF25_exon_chr1:6462174	1	1	0	NA	1
112	PLEKHG5	34.3204	24.0775	-0.4679	1	NC	No	No	1	PLEKHG5_exon_chr1:6467572	1	1	0	NA	1
113	NOL9	122.41	121.393	0.0017	1	NC	No	No	1	NOL9_exon_chr1:6526003	1	1	0	NA	7	90.62	92.67	2.05	NA
114	ZBTB48	32.5422	29.3412	-0.1132	1	NC	No	No	1	ZBTB48_exon_chr1:6588059	1	1	0	NA	1
115	KLHL21	101.257	141.815	0.489	0.071349	NC	No	No	1	KLHL21_exon_chr1:6595557	1	1	0	NA	1
116	PHF13	142.141	122.32	-0.2402	0.706901	NC	No	No	1	PHF13_exon_chr1:6621410	1	1	0	NA	1
117	THAP3	94.7252	81.838	-0.209	1	NC	No	No	1	THAP3_exon_chr1:6632369	1	1	0	NA	1
118	DNAJC11	140.973	137.839	-0.0327	1	NC	No	No	1	DNAJC11_exon_chr1:6635700	1	1	0	NA	3	83.04	86.89	3.85	NA
119	CAMTA1	247.889	261.941	0.0706	0.859456	NC	No	No	3	CAMTA1_exon_chr1:6871756	0.3438	0.3147	-0.0291	NA	2	96.35	92.59	-3.76	NA
120	CAMTA1									CAMTA1_exon_chr1:6887653	0.5537	0.5485	-0.0051	NA	1
121	CAMTA1									CAMTA1_exon_chr1:7766458	0.1025	0.1367	0.0342	NA	1
122	CAMTA1-IT1	7.3487	6.1567	-0.3182	1	NC	No	No	1	CAMTA1-IT1_exon_chr1:7370080	1	1	0	NA	1
123	VAMP3	486.676	482.48	-0.018	0.892526	NC	No	No	1	VAMP3_exon_chr1:7779625	1	1	0	NA	1
124	UTS2	13.6047	5.4953	-1.0747	1	NC	No	No	2	UTS2_exon_chr1:7843950	0.1607	0.2684	0.1077	NA	2	67.1	44.73	-22.37	NA
125	UTS2									UTS2_exon_chr1:7847882	0.8393	0.7316	-0.1077	NA	1
126	PARK7	920.524	837.596	-0.127	0.277303	NC	No	No	1	PARK7_exon_chr1:7984863	1	1	0	NA	1
127	ERRFI1	1213.23	1350.66	0.1614	0.0952985	NC	No	No	1	ERRFI1_exon_chr1:8015400	1	1	0	NA	1
128	SLC45A1	94.9985	105.749	0.1441	0.860797	NC	No	No	1	SLC45A1_exon_chr1:8343746	1	1	0	NA	1
129	RERE	134.186	154.522	0.1404	1	NC	No	No	2	RERE_exon_chr1:8355120	0.5605	0.5181	-0.0423	NA	6	81.97	87.17	5.2	NA
130	RERE									RERE_exon_chr1:8656441	0.4342	0.4794	0.0452	NA	3	35.41	27.37	-8.04	NA
131	ENO1	9747.6	9072.39	-0.1035	0.259059	NC	No	No	1	ENO1_exon_chr1:8861429	1	1	0	NA	1
132	GPR157	14.4575	31.8012	1.1434	1	NC	No	No	1	GPR157_exon_chr1:9104634	1	1	0	NA	1
133	MIR34AHG	10.1316	12.6926	0.2556	1	NC	No	No	1	MIR34AHG_exon_chr1:9151835	1	1	0	NA	1
134	H6PD	57.6051	51.1638	-0.1454	1	NC	No	No	1	H6PD_exon_chr1:9263508	1	1	0	NA	1
135	SPSB1	42.5563	62.0034	0.5206	0.4219	NC	No	No	1	SPSB1_exon_chr1:9367447	1	1	0	NA	2	78.64	76.41	-2.23	NA
136	SLC25A33	196.173	199.127	0.0212	1	NC	No	No	1	SLC25A33_exon_chr1:9582298	1	1	0	NA	5	81.73	80.72	-1.01	NA
137	TMEM201	238.877	202.703	-0.2489	0.280551	NC	No	No	2	TMEM201_exon_chr1:9602068	0.0835	0.1044	0.0209	NA	1
138	TMEM201									TMEM201_exon_chr1:9612985	0.9165	0.8956	-0.0209	NA	1
139	PIK3CD-AS2	68.5607	55.4161	-0.3715	0.841163	NC	No	No	2	PIK3CD-AS2_exon_chr1:9672719	0.1851	0.1802	-0.005	NA	1
140	PIK3CD-AS2									PIK3CD-AS2_exon_chr1:9681135	0.8149	0.8198	0.005	NA	1
141	PIK3CD	105.543	129.069	0.2701	0.441341	NC	No	No	1	PIK3CD_exon_chr1:9726908	1	1	0	NA	1
142	CLSTN1	354.675	333.397	-0.1038	0.775674	NC	No	No	1	CLSTN1_exon_chr1:9730705	1	1	0	NA	3	80.28	79.41	-0.87	NA
143	CTNNBIP1	225.549	217.232	-0.0404	1	NC	No	No	1	CTNNBIP1_exon_chr1:9850776	1	1	0	NA	4	46.15	42.03	-4.13	NA
144	LZIC	187.259	225.854	0.259	0.270469	NC	No	No	2	LZIC_exon_chr1:9922358	0.061	0.0522	-0.0088	NA	1
145	LZIC									LZIC_exon_chr1:9930457	0.939	0.9478	0.0088	NA	12	50.45	48.51	-1.94	NA
146	AL603962.1	30.8794	39.0797	0.3113	1	NC	No	No	1	AL603962.1_exon_chr1:9982300	1	1	0	NA	3	27.43	33.6	6.17	NA
147	RBP7	486.554	442.909	-0.1252	0.553346	NC	No	No	1	RBP7_exon_chr1:10015781	1	1	0	NA	1
148	UBE4B	114.891	137.79	0.2792	0.4542	NC	No	No	1	UBE4B_exon_chr1:10179894	1	1	0	NA	3	65.49	59	-6.49	NA
149	KIF1B	228.816	244.699	0.1188	0.723771	NC	No	No	3	KIF1B_exon_chr1:10297173	0.3779	0.3123	-0.0655	NA	1
150	KIF1B									KIF1B_exon_chr1:10303162	0.1795	0.2717	0.0922	NA	1
151	KIF1B									KIF1B_exon_chr1:10376544	0.3436	0.343	-0.0006	NA	1
152	PGD	687.733	618.86	-0.1643	0.230291	NC	No	No	1	PGD_exon_chr1:10419416	1	1	0	NA	2	19.14	18	-1.14	NA
153	CENPS-CORT	230.557	157.969	-0.5728	0.00437298	DOWN	No	No	2	CENPS-CORT_exon_chr1:10442264	0.7757	0.7189	-0.0569	NA	4	44.86	50.05	5.19	NA
154	CENPS-CORT									CENPS-CORT_exon_chr1:10451376	0.2243	0.2811	0.0569	NA	1
155	DFFA	332.793	291.197	-0.1953	0.349282	NC	No	No	2	DFFA_exon_chr1:10461702	0.7678	0.7222	-0.0456	NA	14	51.56	58	6.44	NA
156	DFFA									DFFA_exon_chr1:10463209	0.2322	0.2778	0.0456	NA	2	49.11	42.97	-6.14	NA
157	PEX14	192.256	211.601	0.1609	0.660316	NC	No	No	1	PEX14_exon_chr1:10629530	1	1	0	NA	1
158	CASZ1	5.7691	6.0431	-0.0177	1	NC	No	No	2	CASZ1_exon_chr1:10640059	0.3117	0.2001	-0.1117	NA	3	84.65	66.67	-17.99	NA
159	CASZ1									CASZ1_exon_chr1:10648139	0.6883	0.7999	0.1117	NA	1
160	TARDBP	12.7993	6.4961	-0.8925	1	NC	No	No	1	TARDBP_exon_chr1:11013715	1	1	0	NA	1
161	AL109811.3	265.425	255.101	-0.0355	1	NC	No	No	1	AL109811.3_exon_chr1:11022123	1	1	0	NA	8	7.17	10.49	3.32	NA
162	AL109811.2	23.2503	18.3209	-0.3071	1	NC	No	No	1	AL109811.2_exon_chr1:11029658	1	1	0	NA	1
163	SRM	420.175	433.613	0.0438	0.818489	NC	No	No	1	SRM_exon_chr1:11055204	1	1	0	NA	1
164	EXOSC10	268.906	265.419	-0.0196	1	NC	No	No	1	EXOSC10_exon_chr1:11066748	1	1	0	NA	1
165	EXOSC10-AS1	7.6386	8.3287	0.1613	1	NC	No	No	1	EXOSC10-AS1_exon_chr1:11101800	1	1	0	NA	1
166	MTOR	155.513	173.014	0.1934	0.62324	NC	No	No	2	MTOR_exon_chr1:11107500	0.9275	0.9454	0.0179	NA	1
167	MTOR									MTOR_exon_chr1:11248094	0.0678	0.0361	-0.0317	NA	1
168	UBIAD1	85.5412	100.56	0.2533	1	NC	No	No	1	UBIAD1_exon_chr1:11285643	1	1	0	NA	5	56.86	61.08	4.22	NA
169	DISP3	7.6601	8.3865	0.1566	1	NC	No	No	1	DISP3_exon_chr1:11536323	1	1	0	NA	1
170	FBXO2	431.431	367.161	-0.2365	0.163988	NC	No	No	1	FBXO2_exon_chr1:11648828	1	1	0	NA	1
171	FBXO44	97.4354	78.3933	-0.3195	0.745418	NC	No	No	1	FBXO44_exon_chr1:11661129	1	1	0	NA	2	66.73	76.69	9.96	NA
172	FBXO6	107.556	137.453	0.356	0.241954	NC	No	No	1	FBXO6_exon_chr1:11673614	1	1	0	NA	2	85.15	89.5	4.35	NA
173	MAD2L2	484.929	418.697	-0.2074	0.16812	NC	No	No	1	MAD2L2_exon_chr1:11674816	1	1	0	NA	1
174	DRAXIN	20.6911	20.5949	0.0452	1	NC	No	No	1	DRAXIN_exon_chr1:11719583	1	1	0	NA	2	90.16	85.79	-4.37	NA
175	AGTRAP	318.744	366.012	0.1808	0.390191	NC	No	No	1	AGTRAP_exon_chr1:11750076	1	1	0	NA	1
176	MTHFR	89.9966	78.405	-0.2569	0.962285	NC	No	No	1	MTHFR_exon_chr1:11790898	1	1	0	NA	4	88.89	86.17	-2.73	NA
177	AL021155.2	8.3483	10.6177	0.3492	1	NC	No	No	1	AL021155.2_exon_chr1:11847433	1	1	0	NA	1
178	KIAA2013	753.881	750.203	-0.0102	0.816295	NC	No	No	1	KIAA2013_exon_chr1:11920332	1	1	0	NA	2	40.52	45.48	4.97	NA
179	PLOD1	1287.33	1336.84	0.0519	0.664723	NC	No	No	1	PLOD1_exon_chr1:11974652	1	1	0	NA	1
180	MFN2	275.457	260.022	-0.0956	0.820969	NC	No	No	1	MFN2_exon_chr1:12011495	1	1	0	NA	1
181	MIIP	532.223	547.661	0.0321	0.868413	NC	No	No	1	MIIP_exon_chr1:12031540	1	1	0	NA	1
182	VPS13D	61.7076	67.4451	0.1808	1	NC	No	No	1	VPS13D_exon_chr1:12508892	1	1	0	NA	6	72.39	82.05	9.66	NA
183	DHRS3	369.295	335.046	-0.1382	0.604288	NC	No	No	1	DHRS3_exon_chr1:12568424	1	1	0	NA	1
184	PRDM2	55.4325	48.5848	-0.2115	1	NC	No	No	3	PRDM2_exon_chr1:13778417	0.1843	0.13	-0.0543	NA	1
185	PRDM2									PRDM2_exon_chr1:13786514	0.606	0.6066	0.0006	NA	3	71.14	64.58	-6.56	NA
186	PRDM2									PRDM2_exon_chr1:13823158	0.1968	0.2492	0.0524	NA	3	83.62	85.38	1.76	NA
187	KAZN	123.287	141.621	0.229	0.530788	NC	No	No	1	KAZN_exon_chr1:15065629	1	1	0	NA	1
188	TMEM51	35.629	44.6619	0.3377	0.896765	NC	No	No	1	TMEM51_exon_chr1:15219325	1	1	0	NA	1
189	FHAD1	12.3994	8.8648	-0.6899	1	NC	No	No	3	FHAD1_exon_chr1:15328276	0.1759	0.1147	-0.0612	NA	3	57.85	33.72	-24.12	NA
190	FHAD1									FHAD1_exon_chr1:15352876	0.7099	0.7617	0.0518	NA	2	35.5	46.77	11.27	NA
191	FHAD1									FHAD1_exon_chr1:15397296	0.1142	0.1236	0.0094	NA	2	17.03	66.67	49.64	NA
192	EFHD2	322.55	358.163	0.1279	0.668153	NC	No	No	1	EFHD2_exon_chr1:15428592	1	1	0	NA	3	56.42	60.09	3.67	NA
193	CASP9	21.0017	27.9719	0.4201	1	NC	No	No	1	CASP9_exon_chr1:15494001	1	1	0	NA	1
194	DNAJC16	64.2764	69.9694	0.0831	1	NC	No	No	1	DNAJC16_exon_chr1:15567777	1	1	0	NA	1
195	DDI2	68.5089	92.6171	0.3922	0.556208	NC	No	No	1	DDI2_exon_chr1:15659836	1	1	0	NA	6	87.76	85.23	-2.54	NA
196	PLEKHM2	269.039	272.429	0.0204	1	NC	No	No	2	PLEKHM2_exon_chr1:15727013	0.2842	0.2636	-0.0206	NA	1
197	PLEKHM2									PLEKHM2_exon_chr1:15733796	0.6957	0.7253	0.0295	NA	1
198	FBLIM1	6.5474	11.046	0.6018	1	NC	No	No	1	FBLIM1_exon_chr1:15784547	1	1	0	NA	2	16.86	30.47	13.6	NA
199	SPEN	136.927	141.512	0.0325	1	NC	No	No	2	SPEN_exon_chr1:15928090	0.5332	0.4459	-0.0873	NA	5	38.85	34.77	-4.09	NA
200	SPEN									SPEN_exon_chr1:15939295	0.4086	0.5171	0.1084	NA	1
201	ZBTB17	103.925	128.637	0.2912	0.549061	NC	No	No	1	ZBTB17_exon_chr1:15942901	1	1	0	NA	1
202	FAM131C	29.6163	24.8497	-0.3509	1	NC	No	No	1	FAM131C_exon_chr1:16058717	1	1	0	NA	1
203	EPHA2	189.459	250.744	0.4021	0.0315012	UP	No	No	1	EPHA2_exon_chr1:16125320	1	1	0	NA	1
204	ARHGEF19	226.105	203.893	-0.1562	0.626762	NC	No	No	1	ARHGEF19_exon_chr1:16198744	1	1	0	NA	2	71.32	63.78	-7.55	NA
205	AL109627.1	8.8167	12.2615	0.4531	1	NC	No	No	1	AL109627.1_exon_chr1:16231335	1	1	0	NA	2	83.54	79.61	-3.94	NA
206	CPLANE2	5.7922	7.4508	0.3853	1	NC	No	No	1	CPLANE2_exon_chr1:16232297	1	1	0	NA	1
207	FBXO42	113.468	96.2221	-0.234	0.787732	NC	No	No	1	FBXO42_exon_chr1:16251785	1	1	0	NA	5	8.86	11.28	2.42	NA
208	SZRD1	564.323	650.678	0.2043	0.105279	NC	No	No	1	SZRD1_exon_chr1:16395037	1	1	0	NA	6	60.64	59.78	-0.86	NA
209	NECAP2	145.862	148.753	0.0517	1	NC	No	No	2	NECAP2_exon_chr1:16441165	0.1771	0.1576	-0.0195	NA	2	97.36	92.38	-4.98	NA
210	NECAP2									NECAP2_exon_chr1:16458841	0.8229	0.8424	0.0195	NA	1
211	RNU1-1	13.1378	8.8157	-0.5515	1	NC	No	No	1	RNU1-1_exon_chr1:16514285	1	1	0	NA	2	68.92	73.48	4.55	NA
212	NBPF1	71.9525	52.015	-0.4326	0.847937	NC	No	No	4	NBPF1_exon_chr1:16564186	0.2495	0.1778	-0.0717	NA	1
213	NBPF1									NBPF1_exon_chr1:16564918	0.2909	0.2429	-0.048	NA	1
214	NBPF1									NBPF1_exon_chr1:16603049	0.3379	0.4083	0.0705	NA	5	73.76	68.68	-5.08	NA
215	NBPF1									NBPF1_exon_chr1:16607691	0.1218	0.171	0.0492	NA	2	78.07	65.38	-12.69	NA
216	CROCCP2	52.9594	57.3413	0.1163	1	NC	No	No	2	CROCCP2_exon_chr1:16619103	0.9255	0.9414	0.0159	NA	2	94.41	90.67	-3.74	NA
217	CROCCP2									CROCCP2_exon_chr1:16631109	0.0745	0.0586	-0.0159	NA	2	67.41	29.93	-37.48	NA
218	MST1P2	72.4891	62.3942	-0.1868	1	NC	No	No	1	MST1P2_exon_chr1:16650073	1	1	0	NA	2	46.57	40.03	-6.55	NA
219	EIF1AXP1	69.137	67.7818	-0.0259	1	NC	No	No	1	EIF1AXP1_exon_chr1:16686055	1	1	0	NA	4	57.35	51.32	-6.03	NA
220	RNU1-4	25.8621	16.1621	-0.7144	1	NC	No	No	1	RNU1-4_exon_chr1:16740515	1	1	0	NA	2	81.12	73.86	-7.27	NA
221	MST1L	54.3354	65.1407	0.27	0.957943	NC	No	No	1	MST1L_exon_chr1:16757393	1	1	0	NA	1
222	RNU1-2	18.8208	9.4373	-1.0583	1	NC	No	No	1	RNU1-2_exon_chr1:16895979	1	1	0	NA	2	62.83	67.36	4.53	NA
223	CROCC	18.1302	20.4784	0.1442	1	NC	No	No	2	CROCC_exon_chr1:16970635	0.1	0.0367	-0.0633	NA	1
224	CROCC									CROCC_exon_chr1:16972359	0.9	0.9633	0.0633	NA	1
225	MFAP2	262.742	312.69	0.2467	0.182343	NC	No	No	1	MFAP2_exon_chr1:16975023	1	1	0	NA	1
226	ATP13A2	292.914	338.714	0.2217	0.283121	NC	No	No	1	ATP13A2_exon_chr1:16986358	1	1	0	NA	1
227	SDHB	542.406	590.713	0.1228	0.426156	NC	No	No	1	SDHB_exon_chr1:17018958	1	1	0	NA	1
228	PADI2	27.6575	19.3717	-0.514	1	NC	No	No	1	PADI2_exon_chr1:17069277	1	1	0	NA	1
229	RCC2	469.511	468.467	-0.0121	0.919598	NC	No	No	1	RCC2_exon_chr1:17409194	1	1	0	NA	1
230	ARHGEF10L	49.6905	56.5003	0.1943	1	NC	No	No	1	ARHGEF10L_exon_chr1:17696847	1	1	0	NA	1
231	ALDH4A1	75.0404	63.4209	-0.2463	1	NC	No	No	2	ALDH4A1_exon_chr1:18872957	0.8415	0.8174	-0.0241	NA	1
232	ALDH4A1									ALDH4A1_exon_chr1:18882672	0.1585	0.1826	0.0241	NA	1
233	IFFO2	38.2289	63.5626	0.7579	0.119111	NC	No	No	1	IFFO2_exon_chr1:18908666	1	1	0	NA	1
234	AL137127.1	226.088	211.762	-0.1001	0.832836	NC	No	No	1	AL137127.1_exon_chr1:19075511	1	1	0	NA	1
235	EMC1	302.217	262.234	-0.2072	0.393621	NC	No	No	1	EMC1_exon_chr1:19221916	1	1	0	NA	7	66.39	65.07	-1.32	NA
236	MRTO4	1068.07	1140.69	0.0912	0.496696	NC	No	No	1	MRTO4_exon_chr1:19258680	1	1	0	NA	7	42.11	44.69	2.59	NA
237	AKR7L	5.5662	7.1424	0.3309	1	NC	No	No	1	AKR7L_exon_chr1:19267461	1	1	0	NA	2	77.87	82.71	4.83	NA
238	AKR7A3	13.7159	11.8147	-0.3028	1	NC	No	No	1	AKR7A3_exon_chr1:19282892	1	1	0	NA	1
239	AKR7A2	320.484	284.496	-0.1901	0.416614	NC	No	No	1	AKR7A2_exon_chr1:19304386	1	1	0	NA	1
240	SLC66A1	99.4756	88.8691	-0.1179	1	NC	No	No	1	SLC66A1_exon_chr1:19328571	1	1	0	NA	3	94.91	92.54	-2.38	NA
241	CAPZB	896.572	875.258	-0.025	0.78024	NC	No	No	1	CAPZB_exon_chr1:19339617	1	1	0	NA	3	73.55	70.35	-3.2	NA
242	AL031727.1	996.185	862.899	-0.206	0.0509966	NC	No	No	1	AL031727.1_exon_chr1:19608113	1	1	0	NA	1
243	MICOS10-NBL1	926.203	852.947	-0.126	0.302955	NC	No	No	2	MICOS10-NBL1_exon_chr1:19626386	0.6644	0.6105	-0.054	NA	1
244	MICOS10-NBL1									MICOS10-NBL1_exon_chr1:19656865	0.3356	0.3895	0.054	NA	2	93.29	90.21	-3.08	NA
245	TMCO4	239.129	246.717	0.0317	1	NC	No	No	1	TMCO4_exon_chr1:19683444	1	1	0	NA	1
246	OTUD3	31.8003	30.877	0.063	1	NC	No	No	1	OTUD3_exon_chr1:19907569	1	1	0	NA	3	96.7	94.13	-2.58	NA
247	CAMK2N1	238.964	294.309	0.3202	0.0769139	NC	No	No	1	CAMK2N1_exon_chr1:20483719	1	1	0	NA	3	30.84	31.75	0.91	NA
248	MUL1	191.411	196.727	0.0259	1	NC	No	No	1	MUL1_exon_chr1:20501419	1	1	0	NA	1
249	CDA	36.4881	49.8085	0.4038	0.816295	NC	No	No	1	CDA_exon_chr1:20618451	1	1	0	NA	1
250	DDOST	2078.69	2178.56	0.0687	0.414676	NC	No	No	1	DDOST_exon_chr1:20652727	1	1	0	NA	3	41.71	44.66	2.95	NA
251	PINK1	93.1721	112.269	0.2281	0.761312	NC	No	No	1	PINK1_exon_chr1:20650433	1	1	0	NA	3	69.8	71.68	1.88	NA
252	SH2D5	14.4758	22.5897	0.7047	1	NC	No	No	1	SH2D5_exon_chr1:20721995	1	1	0	NA	1
253	HP1BP3	377.598	388.24	0.0499	0.813185	NC	No	No	3	HP1BP3_exon_chr1:20745091	0.7302	0.7036	-0.0266	NA	3	85.55	86.95	1.4	NA
254	HP1BP3									HP1BP3_exon_chr1:20775005	0.1744	0.1916	0.0172	NA	1
255	HP1BP3									HP1BP3_exon_chr1:20776750	0.0945	0.101	0.0066	NA	3	12.66	7.1	-5.56	NA
256	EIF4G3	282.755	283.979	0.0001	0.972075	NC	No	No	2	EIF4G3_exon_chr1:20807500	0.8222	0.8567	0.0346	NA	6	58	60.33	2.32	NA
257	EIF4G3									EIF4G3_exon_chr1:20862332	0.1068	0.0653	-0.0415	NA	1
258	ECE1	626.235	646.138	0.0494	0.660316	NC	No	No	1	ECE1_exon_chr1:21220131	1	1	0	NA	3	84.47	83.83	-0.64	NA
259	NBPF3	8.3746	5.1	-0.6759	1	NC	No	No	1	NBPF3_exon_chr1:21483142	1	1	0	NA	1
260	RAP1GAP	58.4602	56.4668	-0.068	1	NC	No	No	1	RAP1GAP_exon_chr1:21597264	1	1	0	NA	1
261	USP48	632.598	505.82	-0.3373	0.00263856	NC	No	No	4	USP48_exon_chr1:21679439	0.1666	0.1763	0.0097	NA	4	34.12	32.32	-1.8	NA
262	USP48									USP48_exon_chr1:21715457	0.2405	0.2168	-0.0237	NA	1
263	USP48									USP48_exon_chr1:21721166	0.5223	0.5294	0.0071	NA	1
264	USP48									USP48_exon_chr1:21728719	0.0551	0.0597	0.0046	NA	1
265	HSPG2	11.2029	17.8092	0.5517	1	NC	No	No	1	HSPG2_exon_chr1:21823488	1	1	0	NA	2	87.02	88.31	1.29	NA
266	AL031281.2	40.1263	32.4978	-0.2256	1	NC	No	No	1	AL031281.2_exon_chr1:22030279	1	1	0	NA	1
267	CDC42	791.206	822.439	0.067	0.551188	NC	No	No	1	CDC42_exon_chr1:22091427	1	1	0	NA	6	82.43	81.26	-1.17	NA
268	ZBTB40	92.3804	96.6526	0.0672	1	NC	No	No	1	ZBTB40_exon_chr1:22526201	1	1	0	NA	7	88.69	88.64	-0.05	NA
269	EPHB2	331.139	336.963	0.028	0.991215	NC	No	No	1	EPHB2_exon_chr1:22912443	1	1	0	NA	6	40.77	44.53	3.76	NA
270	KDM1A	146.861	157.766	0.1054	1	NC	No	No	2	KDM1A_exon_chr1:23069060	0.064	0.0426	-0.0214	NA	1
271	KDM1A									KDM1A_exon_chr1:23080872	0.9262	0.9428	0.0166	NA	1
272	AL031428.1	35.4292	41.8333	0.2361	1	NC	No	No	1	AL031428.1_exon_chr1:23089053	1	1	0	NA	4	49.87	43.95	-5.92	NA
273	LUZP1	491.3	449.06	-0.1345	0.608513	NC	No	No	1	LUZP1_exon_chr1:23094380	1	1	0	NA	8	62.41	60.16	-2.25	NA
274	HTR1D	6.1052	13.6609	1.081	1	NC	No	No	1	HTR1D_exon_chr1:23194729	1	1	0	NA	2	83.46	75.09	-8.38	NA
275	HNRNPR	613.03	605.008	-0.0137	0.829606	NC	No	No	2	HNRNPR_exon_chr1:23311066	0.743	0.7934	0.0504	NA	7	58.05	59.09	1.04	NA
276	HNRNPR									HNRNPR_exon_chr1:23311322	0.2197	0.1745	-0.0452	NA	2	49.5	51.31	1.81	NA
277	ZNF436	17.3943	21.1543	0.2639	1	NC	No	No	1	ZNF436_exon_chr1:23363221	1	1	0	NA	2	86.64	83.88	-2.76	NA
278	Y	18.0549	16.733	-0.0489	1	NC	No	No	5	Y_exon_chr1:23369198	0.1209	0.1015	-0.0194	NA	1
279	Y									Y_exon_chr2:200863247	0.3124	0.2009	-0.1115	NA	1
280	Y									Y_exon_chr3:125528349	0.3045	0.3532	0.0487	NA	1
281	Y									Y_exon_chr3:23273806	0.0602	0.0683	0.0081	NA	1
282	Y									Y_exon_chr9:37160136	0.1223	0.2398	0.1175	NA	1
283	TCEA3	159.027	151.384	-0.0829	0.963034	NC	No	No	1	TCEA3_exon_chr1:23381474	1	1	0	NA	2	17.89	18.84	0.94	NA
284	ASAP3	16.0802	15.02	-0.1866	1	NC	No	No	1	ASAP3_exon_chr1:23429930	1	1	0	NA	2	94.24	86.84	-7.41	NA
285	E2F2	24.2099	23.2603	-0.0977	1	NC	No	No	1	E2F2_exon_chr1:23510148	1	1	0	NA	1
286	ID3	389.54	338.975	-0.1905	0.292022	NC	No	No	1	ID3_exon_chr1:23559075	1	1	0	NA	1
287	RPL11	16580.8	15034.4	-0.1408	0.0191091	NC	No	No	1	RPL11_exon_chr1:23696343	1	1	0	NA	1
288	ELOA	171.38	199.555	0.2209	0.427257	NC	No	No	2	ELOA_exon_chr1:23750844	0.3509	0.2827	-0.0682	NA	3	92.88	89.36	-3.53	NA
289	ELOA									ELOA_exon_chr1:23759511	0.6491	0.7173	0.0682	NA	4	68.36	57.04	-11.32	NA
290	ELOA-AS1	14.7473	8.0781	-0.9206	1	NC	No	No	1	ELOA-AS1_exon_chr1:23761151	1	1	0	NA	2	68.06	60.08	-7.98	NA
291	PITHD1	57.0807	53.7024	-0.0943	1	NC	No	No	1	PITHD1_exon_chr1:23787274	1	1	0	NA	2	92.42	94.36	1.94	NA
292	GALE	336.682	423.388	0.3348	0.0262442	NC	No	No	1	GALE_exon_chr1:23796782	1	1	0	NA	1
293	LYPLA2	135.221	154.129	0.1683	0.684315	NC	No	No	1	LYPLA2_exon_chr1:23794223	1	1	0	NA	1
294	HMGCL	109.656	101.647	-0.1447	0.814752	NC	No	No	1	HMGCL_exon_chr1:23802564	1	1	0	NA	1
295	FUCA1	39.1327	33.4187	-0.2056	1	NC	No	No	1	FUCA1_exon_chr1:23845855	1	1	0	NA	1
296	PNRC2	473.744	521.857	0.1333	0.50636	NC	No	No	1	PNRC2_exon_chr1:23961439	1	1	0	NA	10	71.66	69.18	-2.48	NA
297	SRSF10	635.197	641.122	0.0127	0.810669	NC	No	No	1	SRSF10_exon_chr1:23972012	1	1	0	NA	16	59.01	62.7	3.69	NA
298	MYOM3	29.017	26.0981	-0.1914	1	NC	No	No	1	MYOM3_exon_chr1:24057627	1	1	0	NA	2	42.5	62.24	19.75	NA
299	IL22RA1	20.292	12.291	-0.6707	1	NC	No	No	1	IL22RA1_exon_chr1:24121737	1	1	0	NA	1
300	IFNLR1	16.2536	13.6784	-0.3132	1	NC	No	No	1	IFNLR1_exon_chr1:24157891	1	1	0	NA	1
301	STPG1	25.5659	25.8601	0.0445	1	NC	No	No	4	STPG1_exon_chr1:24358619	0.8135	0.6406	-0.1729	NA	2	96.41	93.34	-3.08	NA
302	STPG1									STPG1_exon_chr1:24369839	0.0565	0.0815	0.025	NA	2	33.59	50.19	16.6	NA
303	STPG1									STPG1_exon_chr1:24379823	0.0715	0.0367	-0.0348	NA	2	7.29	35.76	28.47	NA
304	STPG1									STPG1_exon_chr1:24391679	0.0445	0.1566	0.1121	NA	2	22.82	23.23	0.42	NA
305	NIPAL3	62.6078	54.8552	-0.2129	1	NC	No	No	2	NIPAL3_exon_chr1:24464025	0.5703	0.5935	0.0232	NA	1
306	NIPAL3									NIPAL3_exon_chr1:24468985	0.4297	0.4065	-0.0232	NA	5	89.96	92.38	2.42	NA
307	RCAN3	77.4776	70.0929	-0.1731	1	NC	No	No	2	RCAN3_exon_chr1:24514313	0.0607	0.0436	-0.0171	NA	1
308	RCAN3									RCAN3_exon_chr1:24535092	0.9393	0.9564	0.0171	NA	6	58.59	54.34	-4.25	NA
309	NCMAP	10.5315	12.9539	0.163	1	NC	No	No	1	NCMAP_exon_chr1:24605605	1	1	0	NA	2	88.9	84.63	-4.27	NA
310	SRRM1	3385.96	3147.46	-0.1099	0.296308	NC	No	No	4	SRRM1_exon_chr1:24646666	0.0961	0.0738	-0.0223	NA	1
311	SRRM1									SRRM1_exon_chr1:24649970	0.5793	0.5681	-0.0111	NA	1
312	SRRM1									SRRM1_exon_chr1:24669122	0.0535	0.0531	-0.0004	NA	1
313	SRRM1									SRRM1_exon_chr1:24672181	0.2432	0.2743	0.0311	NA	1
314	CLIC4	312.809	423.911	0.4483	0.000370636	UP	No	No	1	CLIC4_exon_chr1:24840772	1	1	0	NA	10	87.13	88.19	1.06	NA
315	RUNX3	86.4234	76.686	-0.1708	1	NC	No	No	1	RUNX3_exon_chr1:24902666	1	1	0	NA	2	47.07	36.87	-10.21	NA
316	SYF2	614.044	600.238	-0.0529	0.676106	NC	No	No	3	SYF2_exon_chr1:25223431	0.221	0.2461	0.0251	NA	5	68.39	67.8	-0.59	NA
317	SYF2									SYF2_exon_chr1:25228235	0.1165	0.1061	-0.0104	NA	1
318	SYF2									SYF2_exon_chr1:25229123	0.6577	0.6445	-0.0132	NA	1
319	RSRP1	81.7656	77.5036	-0.0479	1	NC	No	No	1	RSRP1_exon_chr1:25242705	1	1	0	NA	1
320	TMEM50A	424.68	473.206	0.1721	0.30998	NC	No	No	1	TMEM50A_exon_chr1:25360659	1	1	0	NA	7	16.63	18.27	1.64	NA
321	MACO1	62.4659	73.5375	0.2135	1	NC	No	No	2	MACO1_exon_chr1:25485612	0.3831	0.3869	0.0038	NA	1
322	MACO1									MACO1_exon_chr1:25498263	0.6112	0.5977	-0.0135	NA	6	23.95	19.33	-4.61	NA
323	LDLRAP1	94.3799	97.7747	0.0407	1	NC	No	No	1	LDLRAP1_exon_chr1:25566847	1	1	0	NA	1
324	AL606491.1	14.8988	9.3824	-0.5264	1	NC	No	No	1	AL606491.1_exon_chr1:25590168	1	1	0	NA	1
325	MAN1C1	6.5075	7.3682	0.23	1	NC	No	No	1	MAN1C1_exon_chr1:25783662	1	1	0	NA	2	0.51	9.66	9.15	NA
326	SELENON	493.462	481.53	-0.0418	0.918028	NC	No	No	1	SELENON_exon_chr1:25815547	1	1	0	NA	1
327	MTFR1L	230.003	227.563	-0.0304	1	NC	No	No	1	MTFR1L_exon_chr1:25831920	1	1	0	NA	3	92.65	92.04	-0.61	NA
328	AUNIP	120.126	133.303	0.1472	0.779497	NC	No	No	1	AUNIP_exon_chr1:25835846	1	1	0	NA	2	39.68	37.3	-2.37	NA
329	PAQR7	261.017	271.007	0.0251	1	NC	No	No	1	PAQR7_exon_chr1:25863861	1	1	0	NA	1
330	STMN1	1165.72	1002.5	-0.2188	0.0145962	NC	No	No	1	STMN1_exon_chr1:25901087	1	1	0	NA	8	20.44	19.31	-1.13	NA
331	PAFAH2	33.2683	24.4611	-0.3677	1	NC	No	No	1	PAFAH2_exon_chr1:25962083	1	1	0	NA	2	93.2	89.74	-3.46	NA
332	FAM110D	9.0452	8.2243	-0.2207	1	NC	No	No	1	FAM110D_exon_chr1:26161211	1	1	0	NA	2	19.23	41.3	22.07	NA
333	ZNF593	589.174	547.11	-0.1256	0.585209	NC	No	No	1	ZNF593_exon_chr1:26170417	1	1	0	NA	1
334	CNKSR1	54.8767	62.1739	0.1914	1	NC	No	No	1	CNKSR1_exon_chr1:26189278	1	1	0	NA	1
335	CEP85	111.718	131.56	0.2158	0.718345	NC	No	No	2	CEP85_exon_chr1:26268482	0.2615	0.3265	0.065	NA	1
336	CEP85									CEP85_exon_chr1:26277132	0.7385	0.6735	-0.065	NA	1
337	SH3BGRL3	871.697	998.708	0.1963	0.0509953	NC	No	No	1	SH3BGRL3_exon_chr1:26280764	1	1	0	NA	1
338	CRYBG2	15.6125	11.7272	-0.3105	1	NC	No	No	1	CRYBG2_exon_chr1:26322056	1	1	0	NA	1
339	DHDDS	55.1004	44.0213	-0.2886	1	NC	No	No	2	DHDDS_exon_chr1:26447558	0.1903	0.1215	-0.0688	NA	2	65.56	91.91	26.36	NA
340	DHDDS									DHDDS_exon_chr1:26468891	0.8097	0.8613	0.0516	NA	5	87.75	77.27	-10.47	NA
341	AL513365.1	1118.69	1028.57	-0.1157	0.31359	NC	No	No	1	AL513365.1_exon_chr1:26455187	1	1	0	NA	1
342	HMGN2	1780.27	1518.21	-0.2308	0.00751689	NC	No	No	1	HMGN2_exon_chr1:26474571	1	1	0	NA	1
343	RPS6KA1	142.851	180.167	0.3355	0.586783	NC	No	No	1	RPS6KA1_exon_chr1:26574078	1	1	0	NA	1
344	AL512408.1	5.7667	6.2878	0.1351	1	NC	No	No	1	AL512408.1_exon_chr1:26694131	1	1	0	NA	1
345	ARID1A	96.8959	84.9092	-0.1844	1	NC	No	No	1	ARID1A_exon_chr1:26778098	1	1	0	NA	1
346	PIGV	51.8945	44.784	-0.1115	1	NC	No	No	1	PIGV_exon_chr1:26797562	1	1	0	NA	3	73.64	76.55	2.91	NA
347	ZDHHC18	189.875	180.865	-0.0818	0.873104	NC	No	No	1	ZDHHC18_exon_chr1:26853725	1	1	0	NA	1
348	SFN	584.327	740.104	0.3343	0.183382	NC	No	No	1	SFN_exon_chr1:26863148	1	1	0	NA	1
349	GPN2	85.0751	87.157	0.0239	1	NC	No	No	1	GPN2_exon_chr1:26879749	1	1	0	NA	3	42.79	42.85	0.06	NA
350	GPATCH3	155.53	143.247	-0.1235	1	NC	No	No	1	GPATCH3_exon_chr1:26891226	1	1	0	NA	1
351	NUDC	3140.46	2953.36	-0.0918	0.338974	NC	No	No	1	NUDC_exon_chr1:26946129	1	1	0	NA	3	19.4	18.6	-0.8	NA
352	KDF1	54.299	58.4898	0.0764	1	NC	No	No	1	KDF1_exon_chr1:26950151	1	1	0	NA	1
353	RPL12P13	122.403	86.5266	-0.4888	0.107643	NC	No	No	1	RPL12P13_exon_chr1:26980164	1	1	0	NA	1
354	TRNP1	301.242	334.559	0.1486	0.624797	NC	No	No	1	TRNP1_exon_chr1:26999846	1	1	0	NA	7	86.82	84.17	-2.65	NA
355	TENT5B	35.0616	48.3489	0.4082	0.791502	NC	No	No	1	TENT5B_exon_chr1:27006957	1	1	0	NA	1
356	SLC9A1	104.848	136.041	0.3709	0.230616	NC	No	No	1	SLC9A1_exon_chr1:27100644	1	1	0	NA	1
357	NPM1P39	36.6461	17.8883	-0.9409	1	NC	No	No	1	NPM1P39_exon_chr1:27206929	1	1	0	NA	1
358	WDTC1	151.819	142.314	-0.073	1	NC	No	No	1	WDTC1_exon_chr1:27306185	1	1	0	NA	1
359	TMEM222	135.37	142.781	0.0792	1	NC	No	No	1	TMEM222_exon_chr1:27334150	1	1	0	NA	1
360	SYTL1	122.574	109.976	-0.1795	0.851173	NC	No	No	1	SYTL1_exon_chr1:27353712	1	1	0	NA	1
361	MAP3K6	217.863	249.215	0.1877	0.454945	NC	No	No	1	MAP3K6_exon_chr1:27355469	1	1	0	NA	1
362	CD164L2	31.2027	23.2483	-0.5023	1	NC	No	No	1	CD164L2_exon_chr1:27380195	1	1	0	NA	1
363	GPR3	13.7645	16.4185	0.2655	1	NC	No	No	1	GPR3_exon_chr1:27393793	1	1	0	NA	1
364	WASF2	209.977	207.599	-0.0268	1	NC	No	No	1	WASF2_exon_chr1:27408346	1	1	0	NA	1
365	AHDC1	9.8019	15.2633	0.6343	1	NC	No	No	1	AHDC1_exon_chr1:27534916	1	1	0	NA	3	54.37	45.31	-9.06	NA
366	AL031729.1	21.6906	14.5193	-0.456	1	NC	No	No	1	AL031729.1_exon_chr1:27649418	1	1	0	NA	1
367	IFI6	78.8838	77.8435	-0.0106	1	NC	No	No	1	IFI6_exon_chr1:27666475	1	1	0	NA	1
368	FAM76A	37.1185	31.7896	-0.2194	1	NC	No	No	1	FAM76A_exon_chr1:27760494	1	1	0	NA	2	72.66	70.98	-1.68	NA
369	RNU6-1245P	113.66	125.645	0.1182	1	NC	No	No	1	RNU6-1245P_exon_chr1:27822230	1	1	0	NA	5	49.49	46.02	-3.47	NA
370	PPP1R8	156.196	137.639	-0.1838	0.633743	NC	No	No	1	PPP1R8_exon_chr1:27850092	1	1	0	NA	5	32.49	37.42	4.93	NA
371	THEMIS2	26.4618	20.574	-0.279	1	NC	No	No	1	THEMIS2_exon_chr1:27885866	1	1	0	NA	1
372	RPA2	1360.43	1398.76	0.0347	0.699121	NC	No	No	1	RPA2_exon_chr1:27892247	1	1	0	NA	1
373	SMPDL3B	44.3205	34.0257	-0.4427	0.778911	NC	No	No	2	SMPDL3B_exon_chr1:27955683	0.1149	0.1212	0.0064	NA	2	95.91	93.46	-2.45	NA
374	SMPDL3B									SMPDL3B_exon_chr1:27958475	0.8851	0.8788	-0.0064	NA	1
375	XKR8	49.8875	63.8564	0.3633	0.708195	NC	No	No	1	XKR8_exon_chr1:27966502	1	1	0	NA	1
376	EYA3	133.085	114.429	-0.2111	0.687124	NC	No	No	1	EYA3_exon_chr1:27974546	1	1	0	NA	1
377	SPCS2P4	423.003	458.95	0.1179	0.495878	NC	No	No	1	SPCS2P4_exon_chr1:28096422	1	1	0	NA	1
378	DNAJC8	741.107	759.695	0.0411	0.718345	NC	No	No	3	DNAJC8_exon_chr1:28201370	0.4611	0.5035	0.0424	NA	3	57.29	55.13	-2.16	NA
379	DNAJC8									DNAJC8_exon_chr1:28208809	0.4182	0.3798	-0.0384	NA	1
380	DNAJC8									DNAJC8_exon_chr1:28210637	0.0962	0.0859	-0.0103	NA	1
381	ATP5IF1	573.536	522.32	-0.1338	0.44923	NC	No	No	1	ATP5IF1_exon_chr1:28236360	1	1	0	NA	2	81.77	78.77	-3	NA
382	SESN2	87.5044	95.478	0.1261	1	NC	No	No	1	SESN2_exon_chr1:28280715	1	1	0	NA	1
383	MED18	234.856	258.07	0.1496	0.605687	NC	No	No	1	MED18_exon_chr1:28334416	1	1	0	NA	1
384	PHACTR4	79.1609	84.8559	0.0831	1	NC	No	No	2	PHACTR4_exon_chr1:28493014	0.2199	0.179	-0.0409	NA	1
385	PHACTR4									PHACTR4_exon_chr1:28496533	0.7291	0.7472	0.018	NA	7	72.09	73.37	1.27	NA
386	RCC1	1459.73	1501.11	0.0402	0.734381	NC	No	No	2	RCC1_exon_chr1:28508558	0.2161	0.2105	-0.0056	NA	1
387	RCC1									RCC1_exon_chr1:28537831	0.7826	0.7895	0.0069	NA	7	22.94	22.31	-0.63	NA
388	TRNAU1AP	191.639	197.593	0.0553	1	NC	No	No	1	TRNAU1AP_exon_chr1:28577499	1	1	0	NA	2	17.35	21.48	4.13	NA
389	SNHG12	1577.29	1428.16	-0.1397	0.154125	NC	No	No	1	SNHG12_exon_chr1:28583132	1	1	0	NA	1
390	TAF12	103.427	72.7099	-0.5247	0.174114	NC	No	No	1	TAF12_exon_chr1:28603574	1	1	0	NA	3	77.71	75.37	-2.34	NA
391	AL360012.1	10.9123	5.8702	-0.835	1	NC	No	No	1	AL360012.1_exon_chr1:28648192	1	1	0	NA	3	64.23	54.56	-9.68	NA
392	GMEB1	48.4578	46.5831	0.0179	1	NC	No	No	1	GMEB1_exon_chr1:28714072	1	1	0	NA	10	71.42	77.78	6.36	NA
393	YTHDF2	287.344	262.071	-0.1407	0.571864	NC	No	No	1	YTHDF2_exon_chr1:28768928	1	1	0	NA	1
394	EPB41	176.119	154.01	-0.2043	0.517003	NC	No	No	3	EPB41_exon_chr1:29053103	0.068	0.0759	0.0079	NA	1
395	EPB41									EPB41_exon_chr1:29058588	0.1078	0.1176	0.0098	NA	1
396	EPB41									EPB41_exon_chr1:29116818	0.8221	0.8057	-0.0163	NA	1
397	TMEM200B	107.188	94.4776	-0.1727	0.773311	NC	No	No	1	TMEM200B_exon_chr1:29121848	1	1	0	NA	1
398	SRSF4	507.752	458.379	-0.1482	0.369316	NC	No	No	1	SRSF4_exon_chr1:29149226	1	1	0	NA	7	40.57	41	0.43	NA
399	MECR	63.6441	40.8854	-0.5814	0.261957	NC	No	No	1	MECR_exon_chr1:29194179	1	1	0	NA	3	9.48	5.72	-3.76	NA
400	PTPRU	157.671	155.345	-0.0196	1	NC	No	No	1	PTPRU_exon_chr1:29325598	1	1	0	NA	1
401	SDC3	32.7376	27.0332	-0.207	1	NC	No	No	1	SDC3_exon_chr1:30873377	1	1	0	NA	1
402	PUM1	125.53	42.4693	-1.5313	9.22924e-10	DOWN	No	No	1	PUM1_exon_chr1:30933342	1	1	0	NA	3	94.71	91.24	-3.47	NA
403	NKAIN1	12.6717	9.9563	-0.1931	1	NC	No	No	1	NKAIN1_exon_chr1:31181712	1	1	0	NA	1
404	SNRNP40	137.634	154.464	0.1937	0.601803	NC	No	No	1	SNRNP40_exon_chr1:31260121	1	1	0	NA	2	38.39	31.37	-7.01	NA
405	ZCCHC17	458.027	474.068	0.0303	1	NC	No	No	3	ZCCHC17_exon_chr1:31337174	0.1637	0.1539	-0.0098	NA	1
406	ZCCHC17									ZCCHC17_exon_chr1:31348828	0.6852	0.7164	0.0312	NA	1
407	ZCCHC17									ZCCHC17_exon_chr1:31364031	0.1503	0.1272	-0.0231	NA	1
408	SERINC2	74.7405	89.303	0.2024	1	NC	No	No	1	SERINC2_exon_chr1:31434063	1	1	0	NA	1
409	TINAGL1	74.003	137.327	0.9153	4.48943e-05	UP	No	No	1	TINAGL1_exon_chr1:31586838	1	1	0	NA	1
410	PEF1	245.468	230.307	-0.0981	0.823342	NC	No	No	1	PEF1_exon_chr1:31630842	1	1	0	NA	1
411	COL16A1	13.517	8.9721	-0.4836	1	NC	No	No	1	COL16A1_exon_chr1:31652853	1	1	0	NA	2	54.58	77.34	22.75	NA
412	ADGRB2	84.7708	82.5782	0.0179	1	NC	No	No	1	ADGRB2_exon_chr1:31728081	1	1	0	NA	1
413	PTP4A2	1835.42	2014.77	0.1322	0.153243	NC	No	No	1	PTP4A2_exon_chr1:31908960	1	1	0	NA	5	34.89	33.3	-1.59	NA
414	KHDRBS1	944.452	858.348	-0.142	0.207425	NC	No	No	1	KHDRBS1_exon_chr1:32042526	1	1	0	NA	9	81.9	78.28	-3.62	NA
415	TMEM39B	231.012	259.042	0.1606	0.556501	NC	No	No	1	TMEM39B_exon_chr1:32102430	1	1	0	NA	1
416	AL049795.2	419.987	432.989	0.0659	0.753739	NC	No	No	1	AL049795.2_exon_chr1:32170706	1	1	0	NA	7	77.01	73.82	-3.19	NA
417	TXLNA	153.081	165.11	0.126	0.770825	NC	No	No	1	TXLNA_exon_chr1:32194901	1	1	0	NA	1
418	CCDC28B	50.0673	37.5019	-0.4041	0.723922	NC	No	No	1	CCDC28B_exon_chr1:32204597	1	1	0	NA	1
419	IQCC	154.139	134.365	-0.2562	0.566131	NC	No	No	1	IQCC_exon_chr1:32207239	1	1	0	NA	1
420	TMEM234	25.4065	27.3995	0.0728	1	NC	No	No	2	TMEM234_exon_chr1:32215049	0.1579	0.2189	0.061	NA	3	50.45	73.94	23.49	NA
421	TMEM234									TMEM234_exon_chr1:32217427	0.8421	0.7811	-0.061	NA	1
422	EIF3I	1966.95	1847.16	-0.0908	0.346137	NC	No	No	1	EIF3I_exon_chr1:32230926	1	1	0	NA	1
423	MTMR9LP	18.8885	13.0864	-0.4459	1	NC	No	No	1	MTMR9LP_exon_chr1:32231969	1	1	0	NA	1
424	HDAC1	489.428	467.833	-0.0689	0.787413	NC	No	No	1	HDAC1_exon_chr1:32333016	1	1	0	NA	1
425	MARCKSL1	233.711	206.814	-0.1602	0.672431	NC	No	No	1	MARCKSL1_exon_chr1:32335097	1	1	0	NA	3	94.21	94.99	0.78	NA
426	FAM229A	67.8239	80.8235	0.2938	0.81959	NC	No	No	1	FAM229A_exon_chr1:32364278	1	1	0	NA	1
427	BSDC1	30.493	39.555	0.3322	1	NC	No	No	1	BSDC1_exon_chr1:32368550	1	1	0	NA	3	53.72	53.02	-0.7	NA
428	AL033529.1	67.4767	60.9569	-0.1451	1	NC	No	No	2	AL033529.1_exon_chr1:32485100	0.1509	0.1598	0.0089	NA	7	49.38	57.77	8.39	NA
429	AL033529.1									AL033529.1_exon_chr1:32600086	0.8491	0.8402	-0.0089	NA	11	71.68	63.04	-8.64	NA
430	ZBTB8OS	394.166	389.271	-0.0255	0.996435	NC	No	No	1	ZBTB8OS_exon_chr1:32621948	1	1	0	NA	3	8.47	8.55	0.08	NA
431	RBBP4	1000.63	852.521	-0.2238	0.0405728	NC	No	No	1	RBBP4_exon_chr1:32679634	1	1	0	NA	5	16.86	15.17	-1.69	NA
432	SYNC	5.8098	5.3171	-0.2699	1	NC	No	No	1	SYNC_exon_chr1:32681860	1	1	0	NA	5	38.31	56.2	17.89	NA
433	KIAA1522	191.481	202.025	0.0827	0.89849	NC	No	No	1	KIAA1522_exon_chr1:32772864	1	1	0	NA	1
434	YARS	1146.26	1184.86	0.0593	0.604762	NC	No	No	1	YARS_exon_chr1:32776091	1	1	0	NA	3	95.55	95.08	-0.47	NA
435	S100PBP	39.7048	50.3054	0.3052	1	NC	No	No	1	S100PBP_exon_chr1:32855923	1	1	0	NA	4	58.46	60.77	2.32	NA
436	TMEM54	356.622	380.651	0.1169	0.700258	NC	No	No	1	TMEM54_exon_chr1:32894879	1	1	0	NA	1
437	RNF19B	68.3483	93.7239	0.445	0.423987	NC	No	No	1	RNF19B_exon_chr1:32937309	1	1	0	NA	1
438	AK2	1041.01	1086.36	0.0738	0.610343	NC	No	No	1	AK2_exon_chr1:33013402	1	1	0	NA	9	63.23	65.04	1.82	NA
439	AZIN2	13.4253	7.9777	-0.884	1	NC	No	No	1	AZIN2_exon_chr1:33117901	1	1	0	NA	1
440	AL662907.1	5.2094	8.3379	0.6349	1	NC	No	No	1	AL662907.1_exon_chr1:33143230	1	1	0	NA	1
441	TRIM62	36.544	33.4273	-0.0609	1	NC	No	No	1	TRIM62_exon_chr1:33147727	1	1	0	NA	1
442	ZNF362	60.0502	71.1837	0.245	1	NC	No	No	1	ZNF362_exon_chr1:33298929	1	1	0	NA	2	62.1	70.26	8.16	NA
443	PHC2	757.103	978.455	0.3637	0.000195097	NC	No	No	1	PHC2_exon_chr1:33325019	1	1	0	NA	1
444	ZSCAN20	8.0401	6.7146	-0.4436	1	NC	No	No	1	ZSCAN20_exon_chr1:33494217	1	1	0	NA	3	5.65	18.21	12.56	NA
445	GJB5	33.8081	32.3785	-0.0686	1	NC	No	No	1	GJB5_exon_chr1:34757306	1	1	0	NA	1
446	GJB3	61.2694	98.935	0.6398	0.0835889	NC	No	No	1	GJB3_exon_chr1:34784737	1	1	0	NA	1
447	SMIM12	246.849	273.421	0.1607	0.548064	NC	No	No	1	SMIM12_exon_chr1:34855982	1	1	0	NA	4	6.36	10.53	4.17	NA
448	AC114490.2	37.3533	38.1852	0.0326	1	NC	No	No	1	AC114490.2_exon_chr1:34982119	1	1	0	NA	1
449	ZMYM6	37.3916	31.6507	-0.2502	1	NC	No	No	2	ZMYM6_exon_chr1:34990311	0.7504	0.7451	-0.0053	NA	4	21.12	25.8	4.68	NA
450	ZMYM6									ZMYM6_exon_chr1:35019602	0.2496	0.2549	0.0053	NA	3	95.25	87.9	-7.35	NA
451	ZMYM1	37.2317	31.8221	-0.2326	1	NC	No	No	1	ZMYM1_exon_chr1:35112976	1	1	0	NA	5	93.45	92.73	-0.71	NA
452	SFPQ	1784.9	1757.66	-0.0176	0.752067	NC	No	No	3	SFPQ_exon_chr1:35176474	0.5198	0.5151	-0.0047	NA	1
453	SFPQ									SFPQ_exon_chr1:35184593	0.2081	0.2366	0.0285	NA	9	77.85	77.55	-0.3	NA
454	SFPQ									SFPQ_exon_chr1:35189382	0.2587	0.2329	-0.0258	NA	1
455	RPL5P4	3237.35	2499.48	-0.3747	0.0203359	NC	No	No	1	RPL5P4_exon_chr1:35350721	1	1	0	NA	1
456	ZMYM4	248.955	247.081	-0.0269	1	NC	No	No	1	ZMYM4_exon_chr1:35419469	1	1	0	NA	9	40.28	39.79	-0.5	NA
457	KIAA0319L	211.099	199.152	-0.085	0.910074	NC	No	No	2	KIAA0319L_exon_chr1:35435597	0.9483	0.9275	-0.0208	NA	1
458	KIAA0319L									KIAA0319L_exon_chr1:35451776	0.0517	0.0725	0.0208	NA	1
459	NCDN	72.6646	78.87	0.1381	1	NC	No	No	1	NCDN_exon_chr1:35565226	1	1	0	NA	1
460	AC004865.2	10.8629	6.6626	-0.471	1	NC	No	No	1	AC004865.2_exon_chr1:35569919	1	1	0	NA	1
461	TFAP2E	7.5732	11.1164	0.5643	1	NC	No	No	1	TFAP2E_exon_chr1:35594393	1	1	0	NA	1
462	PSMB2	1119.76	1050.08	-0.0903	0.371966	NC	No	No	1	PSMB2_exon_chr1:35603374	1	1	0	NA	10	42.78	44.94	2.17	NA
463	C1orf216	142.709	118.248	-0.2455	0.46234	NC	No	No	1	C1orf216_exon_chr1:35716326	1	1	0	NA	1
464	CLSPN	1296.43	1320.39	0.0223	0.83178	NC	No	No	4	CLSPN_exon_chr1:35736606	0.0919	0.1081	0.0161	NA	5	56.69	52.03	-4.66	NA
465	CLSPN									CLSPN_exon_chr1:35749811	0.2462	0.2436	-0.0026	NA	1
466	CLSPN									CLSPN_exon_chr1:35751506	0.3432	0.3083	-0.0349	NA	1
467	CLSPN									CLSPN_exon_chr1:35764714	0.3043	0.3296	0.0253	NA	1
468	AGO4	14.855	20.7751	0.4672	1	NC	No	No	1	AGO4_exon_chr1:35853487	1	1	0	NA	7	90.46	71.36	-19.1	NA
469	AGO1	248.09	274.738	0.1301	0.680972	NC	No	No	1	AGO1_exon_chr1:35919498	1	1	0	NA	12	44.79	42.05	-2.73	NA
470	AGO3	71.468	82.2383	0.1577	1	NC	No	No	1	AGO3_exon_chr1:36055636	1	1	0	NA	11	71.61	59.34	-12.27	NA
471	ADPRHL2	133.147	131.986	-0.0422	1	NC	No	No	1	ADPRHL2_exon_chr1:36093096	1	1	0	NA	1
472	TRAPPC3	212.011	209.252	-0.0206	1	NC	No	No	1	TRAPPC3_exon_chr1:36137978	1	1	0	NA	2	81.66	79.29	-2.37	NA
473	MAP7D1	350.955	409.483	0.2168	0.208049	NC	No	No	1	MAP7D1_exon_chr1:36180247	1	1	0	NA	1
474	THRAP3	890.403	800.399	-0.163	0.162341	NC	No	No	4	THRAP3_exon_chr1:36289059	0.0593	0.0855	0.0263	NA	2	23.06	20.16	-2.9	NA
475	THRAP3									THRAP3_exon_chr1:36296582	0.1958	0.163	-0.0329	NA	3	57.21	59.98	2.76	NA
476	THRAP3									THRAP3_exon_chr1:36301552	0.2487	0.2476	-0.0011	NA	1
477	THRAP3									THRAP3_exon_chr1:36303795	0.4867	0.4905	0.0038	NA	4	88.65	89.85	1.2	NA
478	SH3D21	20.9558	19.3358	-0.0501	1	NC	No	No	2	SH3D21_exon_chr1:36321055	0.6811	0.7455	0.0644	NA	2	89.13	95.81	6.69	NA
479	SH3D21									SH3D21_exon_chr1:36327719	0.3189	0.2545	-0.0644	NA	2	52.96	52.28	-0.68	NA
480	EVA1B	794.805	874.31	0.1249	0.373285	NC	No	No	1	EVA1B_exon_chr1:36322725	1	1	0	NA	1
481	STK40	36.1919	51.5562	0.5205	0.524817	NC	No	No	1	STK40_exon_chr1:36343448	1	1	0	NA	4	78.89	68.19	-10.7	NA
482	LSM10	92.0599	113.76	0.3052	0.397068	NC	No	No	1	LSM10_exon_chr1:36394153	1	1	0	NA	1
483	OSCP1	22.3644	15.1346	-0.5242	1	NC	No	No	2	OSCP1_exon_chr1:36418578	0.8227	0.8272	0.0045	NA	1
484	OSCP1									OSCP1_exon_chr1:36428475	0.1445	0.1728	0.0283	NA	1
485	MRPS15	1517.23	1608.99	0.0828	0.440632	NC	No	No	1	MRPS15_exon_chr1:36455925	1	1	0	NA	1
486	LINC01137	7.281	5.9722	-0.2603	1	NC	No	No	1	LINC01137_exon_chr1:37455912	1	1	0	NA	1
487	ZC3H12A	47.6863	33.4934	-0.4151	0.908763	NC	No	No	1	ZC3H12A_exon_chr1:37482349	1	1	0	NA	1
488	MEAF6	174.68	187.205	0.0888	0.844847	NC	No	No	1	MEAF6_exon_chr1:37494107	1	1	0	NA	5	16.73	14.9	-1.83	NA
489	SNIP1	49.6674	62.7362	0.349	0.770828	NC	No	No	1	SNIP1_exon_chr1:37538012	1	1	0	NA	3	45.3	39.35	-5.95	NA
490	FTH1P1	119.96	131.855	0.1536	0.904797	NC	No	No	1	FTH1P1_exon_chr1:37544762	1	1	0	NA	1
491	GNL2	2098.9	2051.68	-0.0331	0.674474	NC	No	No	2	GNL2_exon_chr1:37567007	0.7861	0.8414	0.0553	NA	4	90.4	91.27	0.86	NA
492	GNL2									GNL2_exon_chr1:37568417	0.1779	0.1323	-0.0456	NA	1
493	RSPO1	11.6874	10.1691	-0.2053	1	NC	No	No	1	RSPO1_exon_chr1:37612921	1	1	0	NA	2	51.88	53.27	1.39	NA
494	C1orf109	137.557	136.183	-0.0271	1	NC	No	No	1	C1orf109_exon_chr1:37684192	1	1	0	NA	1
495	CDCA8	175.17	175	0.0288	1	NC	No	No	3	CDCA8_exon_chr1:37700435	0.3531	0.2771	-0.076	NA	1
496	CDCA8									CDCA8_exon_chr1:37701753	0.0732	0.1013	0.0281	NA	1
497	CDCA8									CDCA8_exon_chr1:37708321	0.5737	0.6216	0.0479	NA	2	70.24	71.61	1.37	NA
498	EPHA10	62.6222	66.1008	0.0753	1	NC	No	No	1	EPHA10_exon_chr1:37718486	1	1	0	NA	1
499	MANEAL	103.6	99.8278	-0.0845	1	NC	No	No	1	MANEAL_exon_chr1:37799566	1	1	0	NA	1
500	YRDC	184.022	218.129	0.2387	0.31078	NC	No	No	1	YRDC_exon_chr1:37803997	1	1	0	NA	5	82.34	80.21	-2.12	NA
501	C1orf122	463.608	472.284	0.0276	0.974855	NC	No	No	1	C1orf122_exon_chr1:37806978	1	1	0	NA	1
502	MTF1	28.6132	37.8151	0.3806	1	NC	No	No	1	MTF1_exon_chr1:37815566	1	1	0	NA	3	54.57	55.14	0.57	NA
503	INPP5B	77.1061	61.4353	-0.356	0.823342	NC	No	No	1	INPP5B_exon_chr1:37862430	1	1	0	NA	3	85.09	83.92	-1.18	NA
504	SF3A3	338.295	363.85	0.1136	0.542876	NC	No	No	1	SF3A3_exon_chr1:37958263	1	1	0	NA	3	32.48	27.88	-4.6	NA
505	FHL3	140.72	188.38	0.414	0.0764362	NC	No	No	1	FHL3_exon_chr1:37997559	1	1	0	NA	1
506	UTP11	178.805	183.078	0.0158	1	NC	No	No	2	UTP11_exon_chr1:38016358	0.3413	0.38	0.0387	NA	2	89.64	87.36	-2.28	NA
507	UTP11									UTP11_exon_chr1:38023544	0.6184	0.5831	-0.0353	NA	3	37.85	38.6	0.75	NA
508	AL354702.1	22.7771	8.6948	-1.2889	0.781994	NC	No	No	1	AL354702.1_exon_chr1:38708930	1	1	0	NA	1
509	AL139260.2	541.229	568.665	0.0882	0.728059	NC	No	No	2	AL139260.2_exon_chr1:38839704	0.1411	0.1344	-0.0067	NA	1
510	AL139260.2									AL139260.2_exon_chr1:38864714	0.8589	0.8656	0.0067	NA	8	81.54	78.08	-3.45	NA
511	AKIRIN1	173.642	185.195	0.0951	0.862042	NC	No	No	1	AKIRIN1_exon_chr1:39004044	1	1	0	NA	7	21.05	21	-0.04	NA
512	NDUFS5	982.88	979.75	0.0076	0.82357	NC	No	No	1	NDUFS5_exon_chr1:39034391	1	1	0	NA	1
513	MACF1	248.979	394.506	0.6628	6.87372e-08	UP	No	No	2	MACF1_exon_chr1:39429826	0.1518	0.1412	-0.0106	NA	1
514	MACF1									MACF1_exon_chr1:39484600	0.717	0.727	0.01	NA	5	62.1	61.06	-1.04	NA
515	OXCT2P1	29.6992	30.0555	0.0561	1	NC	No	No	1	OXCT2P1_exon_chr1:39514955	1	1	0	NA	1
516	PPIEL	141.791	136.477	-0.0448	1	NC	No	No	1	PPIEL_exon_chr1:39522505	1	1	0	NA	1
517	BMP8A	10.8277	7.3061	-0.6071	1	NC	No	No	1	BMP8A_exon_chr1:39525648	1	1	0	NA	1
518	PABPC4	771.679	863.025	0.154	0.19281	NC	No	No	2	PABPC4_exon_chr1:39564542	0.9248	0.918	-0.0068	NA	1
519	PABPC4									PABPC4_exon_chr1:39576790	0.0498	0.0619	0.0121	NA	1
520	HEYL	32.2492	30.7344	-0.0755	1	NC	No	No	1	HEYL_exon_chr1:39627180	1	1	0	NA	3	68.09	80.54	12.45	NA
521	HPCAL4	46.2625	41.3948	-0.1444	1	NC	No	No	1	HPCAL4_exon_chr1:39682733	1	1	0	NA	3	34.13	32.84	-1.29	NA
522	PPIE	252.881	234.501	-0.1014	0.802638	NC	No	No	2	PPIE_exon_chr1:39752909	0.379	0.3907	0.0117	NA	1
523	PPIE									PPIE_exon_chr1:39763688	0.621	0.6093	-0.0117	NA	1
524	BMP8B	23.6255	19.4543	-0.3017	1	NC	No	No	1	BMP8B_exon_chr1:39760568	1	1	0	NA	1
525	OXCT2	30.0553	30.3964	0.0594	1	NC	No	No	1	OXCT2_exon_chr1:39771348	1	1	0	NA	1
526	TRIT1	51.2486	49.082	-0.0613	1	NC	No	No	1	TRIT1_exon_chr1:39841913	1	1	0	NA	1
527	MYCL	19.8422	18.4122	-0.0131	1	NC	No	No	2	MYCL_exon_chr1:39897970	0.8517	0.8081	-0.0436	NA	3	87.22	91.13	3.91	NA
528	MYCL									MYCL_exon_chr1:39902013	0.1483	0.1919	0.0436	NA	2	62.42	22.18	-40.24	NA
529	MFSD2A	37.457	36.0739	-0.1213	1	NC	No	No	2	MFSD2A_exon_chr1:39955111	0.0865	0.0281	-0.0583	NA	1
530	MFSD2A									MFSD2A_exon_chr1:39969504	0.9135	0.9719	0.0583	NA	2	93.57	85.37	-8.2	NA
531	AL663070.1	38.4661	42.434	0.1321	1	NC	No	No	1	AL663070.1_exon_chr1:39962679	1	1	0	NA	1
532	CAP1	1544.43	1723	0.1627	0.0525798	NC	No	No	1	CAP1_exon_chr1:40071449	1	1	0	NA	1
533	PPT1	416.794	413.782	-0.0101	1	NC	No	No	1	PPT1_exon_chr1:40074183	1	1	0	NA	1
534	RLF	58.9087	59.49	0.0207	1	NC	No	No	1	RLF_exon_chr1:40235791	1	1	0	NA	7	92.25	90.93	-1.32	NA
535	AL050341.2	13.1394	10.0112	-0.3925	1	NC	No	No	1	AL050341.2_exon_chr1:40257967	1	1	0	NA	1
536	ZMPSTE24	162.545	171.183	0.0623	1	NC	No	No	2	ZMPSTE24_exon_chr1:40281342	0.099	0.0877	-0.0113	NA	1
537	ZMPSTE24									ZMPSTE24_exon_chr1:40292444	0.901	0.9123	0.0113	NA	5	61.34	61.61	0.26	NA
538	COL9A2	11.3146	9.8709	-0.1532	1	NC	No	No	1	COL9A2_exon_chr1:40301381	1	1	0	NA	3	82.53	73.73	-8.8	NA
539	AL031985.2	11.6722	11.4204	-0.0414	1	NC	No	No	1	AL031985.2_exon_chr1:40333557	1	1	0	NA	1
540	SMAP2	52.3327	50.8291	-0.0097	1	NC	No	No	1	SMAP2_exon_chr1:40421975	1	1	0	NA	3	78	66.58	-11.42	NA
541	ZNF684	42.2939	45.1596	0.0632	1	NC	No	No	2	ZNF684_exon_chr1:40544396	0.068	0.1127	0.0447	NA	1
542	ZNF684									ZNF684_exon_chr1:40546561	0.932	0.8873	-0.0447	NA	1
543	RIMS3	68.3155	55.3242	-0.2875	1	NC	No	No	1	RIMS3_exon_chr1:40626729	1	1	0	NA	1
544	NFYC	184.292	198.322	0.12	0.776375	NC	No	No	1	NFYC_exon_chr1:40770322	1	1	0	NA	2	28.31	25.6	-2.71	NA
545	KCNQ4	11.6913	6.4694	-0.6824	1	NC	No	No	1	KCNQ4_exon_chr1:40838310	1	1	0	NA	1
546	CITED4	50.5373	52.4147	-0.0125	1	NC	No	No	1	CITED4_exon_chr1:40862363	1	1	0	NA	1
547	CTPS1	414.489	413.393	-0.0185	0.895249	NC	No	No	1	CTPS1_exon_chr1:41009444	1	1	0	NA	5	92.11	93.41	1.31	NA
548	SCMH1	76.2532	80.4448	0.0956	1	NC	No	No	1	SCMH1_exon_chr1:41028319	1	1	0	NA	1
549	FOXO6	39.2204	42.772	0.0796	1	NC	No	No	1	FOXO6_exon_chr1:41381615	1	1	0	NA	1
550	HIVEP3	37.3063	51.713	0.4455	1	NC	No	No	2	HIVEP3_exon_chr1:41511266	0.7863	0.7965	0.0102	NA	4	22.8	19.53	-3.27	NA
551	HIVEP3									HIVEP3_exon_chr1:41848445	0.2137	0.2035	-0.0102	NA	3	95.85	77.14	-18.71	NA
552	FOXJ3	158.299	171.029	0.1097	0.868413	NC	No	No	1	FOXJ3_exon_chr1:42179825	1	1	0	NA	1
553	RIMKLA	25.4144	26.2582	0.1549	1	NC	No	No	1	RIMKLA_exon_chr1:42414483	1	1	0	NA	7	27.97	32.86	4.89	NA
554	PPCS	606.202	546.823	-0.1557	0.355694	NC	No	No	1	PPCS_exon_chr1:42459602	1	1	0	NA	1
555	CCDC30	14.8828	14.6359	0.0067	1	NC	No	No	1	CCDC30_exon_chr1:42473121	1	1	0	NA	2	34.82	53.61	18.79	NA
556	PPIH	184.731	209.341	0.1994	0.476668	NC	No	No	1	PPIH_exon_chr1:42676583	1	1	0	NA	1
557	AC098484.2	11.2053	15.4653	0.4507	1	NC	No	No	2	AC098484.2_exon_chr1:42678734	0.1613	0.3734	0.2122	NA	1
558	AC098484.2									AC098484.2_exon_chr1:42681193	0.8387	0.6266	-0.2122	NA	2	70.05	79.23	9.18	NA
559	YBX1	8432.29	7702.79	-0.1323	0.124087	NC	No	No	2	YBX1_exon_chr1:42700780	0.6786	0.6612	-0.0173	NA	1
560	YBX1									YBX1_exon_chr1:42701980	0.321	0.3384	0.0174	NA	1
561	P3H1	186.298	214.354	0.1757	0.600031	NC	No	No	1	P3H1_exon_chr1:42747798	1	1	0	NA	1
562	AC098484.3	46.8989	38.9203	-0.2836	1	NC	No	No	1	AC098484.3_exon_chr1:42775208	1	1	0	NA	9	69.58	65.8	-3.78	NA
563	SVBP	59.6815	55.9799	-0.1666	1	NC	No	No	1	SVBP_exon_chr1:42807500	1	1	0	NA	1
564	ZNF691	12.2511	7.6663	-0.6706	1	NC	No	No	1	ZNF691_exon_chr1:42850922	1	1	0	NA	2	75.24	70.26	-4.98	NA
565	SLC2A1	291.103	454.613	0.6607	2.32667e-07	UP	No	No	1	SLC2A1_exon_chr1:42927241	1	1	0	NA	1
566	EBNA1BP2	1497.81	1691.32	0.1726	0.125704	NC	No	No	2	EBNA1BP2_exon_chr1:43164493	0.9326	0.9337	0.0011	NA	3	59.8	58.65	-1.14	NA
567	EBNA1BP2									EBNA1BP2_exon_chr1:43164805	0.0588	0.0571	-0.0017	NA	1
568	TMEM125	36.2868	28.3517	-0.4474	1	NC	No	No	1	TMEM125_exon_chr1:43272577	1	1	0	NA	1
569	C1orf210	11.3768	12.1289	0.0777	1	NC	No	No	1	C1orf210_exon_chr1:43283107	1	1	0	NA	1
570	CDC20	1844.29	1951.4	0.0764	0.513409	NC	No	No	1	CDC20_exon_chr1:43362950	1	1	0	NA	1
571	ELOVL1	1073.23	1174.37	0.1225	0.312627	NC	No	No	1	ELOVL1_exon_chr1:43364794	1	1	0	NA	1
572	MED8	266.547	296.226	0.1853	0.49091	NC	No	No	1	MED8_exon_chr1:43385106	1	1	0	NA	4	26.31	30.54	4.23	NA
573	HYI-AS1	76.4091	82.492	0.0986	1	NC	No	No	1	HYI-AS1_exon_chr1:43450336	1	1	0	NA	3	9.83	9.68	-0.15	NA
574	HYI	61.907	66.8548	0.1405	1	NC	No	No	1	HYI_exon_chr1:43451740	1	1	0	NA	1
575	PTPRF	232.951	270.242	0.2092	0.429585	NC	No	No	1	PTPRF_exon_chr1:43621934	1	1	0	NA	2	86.66	85.68	-0.98	NA
576	KDM4A	142.324	131.018	-0.1501	0.784237	NC	No	No	1	KDM4A_exon_chr1:43704229	1	1	0	NA	3	55.29	52.95	-2.34	NA
577	AL451062.3	11.2946	8.6152	-0.4437	1	NC	No	No	1	AL451062.3_exon_chr1:43930018	1	1	0	NA	1
578	ARTN	20.5105	22.363	0.0825	1	NC	No	No	1	ARTN_exon_chr1:43935806	1	1	0	NA	1
579	IPO13	20.382	28.6653	0.5218	1	NC	No	No	1	IPO13_exon_chr1:43967585	1	1	0	NA	2	49.57	47.56	-2.01	NA
580	DPH2	422.06	423.325	0.0131	1	NC	No	No	1	DPH2_exon_chr1:43972414	1	1	0	NA	2	95.15	95.06	-0.09	NA
581	ATP6V0B	242.825	288.174	0.2341	0.308577	NC	No	No	1	ATP6V0B_exon_chr1:43976301	1	1	0	NA	1
582	B4GALT2	753.535	797.603	0.0737	0.542222	NC	No	No	1	B4GALT2_exon_chr1:43990297	1	1	0	NA	1
583	SLC6A9	11.3122	9.7247	-0.1435	1	NC	No	No	1	SLC6A9_exon_chr1:43997739	1	1	0	NA	1
584	CCDC24	193.611	169.683	-0.1931	0.502097	NC	No	No	1	CCDC24_exon_chr1:43993803	1	1	0	NA	1
585	AL139220.2	5.0339	5.6415	0.2969	1	NC	No	No	1	AL139220.2_exon_chr1:44039906	1	1	0	NA	1
586	AL356653.1	20.0627	18.4342	-0.1075	1	NC	No	No	1	AL356653.1_exon_chr1:44122512	1	1	0	NA	1
587	DMAP1	119.327	116.325	-0.0852	1	NC	No	No	1	DMAP1_exon_chr1:44220558	1	1	0	NA	1
588	ERI3	426.888	332.711	-0.3423	0.0122949	NC	No	No	1	ERI3_exon_chr1:44221640	1	1	0	NA	1
589	RNF220	142.7	163.021	0.2142	0.650004	NC	No	No	2	RNF220_exon_chr1:44636029	0.1961	0.1494	-0.0466	NA	2	79.67	90.93	11.25	NA
590	RNF220									RNF220_exon_chr1:44648307	0.7936	0.8456	0.0521	NA	1
591	TMEM53	44.2958	29.6791	-0.4812	0.670841	NC	No	No	2	TMEM53_exon_chr1:44636457	0.2946	0.2307	-0.064	NA	1
592	TMEM53									TMEM53_exon_chr1:44655209	0.7054	0.7693	0.064	NA	3	63.14	72.18	9.03	NA
593	RNU5F-1	8.666	12.3785	0.3932	1	NC	No	No	1	RNU5F-1_exon_chr1:44721902	1	1	0	NA	2	32.84	17.9	-14.95	NA
594	ARMH1	9.7357	12.8917	0.4368	1	NC	No	No	1	ARMH1_exon_chr1:44725290	1	1	0	NA	1
595	KIF2C	206.327	182.467	-0.1678	0.623197	NC	No	No	2	KIF2C_exon_chr1:44753732	0.0698	0.0531	-0.0167	NA	1
596	KIF2C									KIF2C_exon_chr1:44766825	0.9302	0.9469	0.0167	NA	3	83.64	81.78	-1.86	NA
597	RPS8	24442.1	22849.6	-0.0983	0.196154	NC	No	No	1	RPS8_exon_chr1:44777842	1	1	0	NA	4	48.33	47.56	-0.77	NA
598	RPS15AP11	118.04	123.887	0.0444	1	NC	No	No	1	RPS15AP11_exon_chr1:44780715	1	1	0	NA	1
599	PLK3	100.791	150.884	0.5791	0.0254265	UP	No	No	1	PLK3_exon_chr1:44805486	1	1	0	NA	1
600	EIF2B3	68.3722	54.5788	-0.3132	0.856702	NC	No	No	2	EIF2B3_exon_chr1:44851003	0.6123	0.6341	0.0218	NA	2	44.71	58.88	14.17	NA
601	EIF2B3									EIF2B3_exon_chr1:44874826	0.3614	0.3575	-0.0039	NA	1
602	HECTD3	84.4898	91.5553	0.1325	1	NC	No	No	1	HECTD3_exon_chr1:45003576	1	1	0	NA	1
603	UROD	335.832	289.049	-0.2362	0.233902	NC	No	No	1	UROD_exon_chr1:45013135	1	1	0	NA	1
604	AL451136.1	72.873	47.8126	-0.5559	0.948913	NC	No	No	1	AL451136.1_exon_chr1:45329437	1	1	0	NA	1
605	TOE1	86.2106	86.752	0.0239	1	NC	No	No	1	TOE1_exon_chr1:45342734	1	1	0	NA	2	35.12	30.91	-4.22	NA
606	CCDC163	9.4188	12.1492	0.4845	1	NC	No	No	1	CCDC163_exon_chr1:45495166	1	1	0	NA	2	37.31	22.32	-15	NA
607	MMACHC	103.49	113.505	0.1173	0.888079	NC	No	No	1	MMACHC_exon_chr1:45508795	1	1	0	NA	7	44.66	43.87	-0.79	NA
608	PRDX1	7102.86	7011.19	-0.0172	0.773381	NC	No	No	1	PRDX1_exon_chr1:45511414	1	1	0	NA	3	92.71	92.06	-0.64	NA
609	AKR1A1	942.673	821.4	-0.1896	0.0602582	NC	No	No	1	AKR1A1_exon_chr1:45569890	1	1	0	NA	1
610	NASP	2053.49	2100.1	0.0243	0.816245	NC	No	No	4	NASP_exon_chr1:45606481	0.1616	0.1397	-0.0219	NA	1
611	NASP									NASP_exon_chr1:45607320	0.0449	0.0644	0.0195	NA	5	21.31	24.66	3.35	NA
612	NASP									NASP_exon_chr1:45609299	0.1753	0.206	0.0307	NA	1
613	NASP									NASP_exon_chr1:45618060	0.5999	0.5697	-0.0301	NA	2	9.5	9.77	0.27	NA
614	GPBP1L1	414.677	408.23	-0.0002	1	NC	No	No	1	GPBP1L1_exon_chr1:45628408	1	1	0	NA	7	38.5	38.07	-0.43	NA
615	TMEM69	81.2828	80.9367	-0.0148	1	NC	No	No	1	TMEM69_exon_chr1:45693203	1	1	0	NA	3	84.94	86.83	1.89	NA
616	AL604028.1	78.2391	60.722	-0.3658	0.62324	NC	No	No	2	AL604028.1_exon_chr1:45694967	0.2871	0.3273	0.0402	NA	1
617	AL604028.1									AL604028.1_exon_chr1:45697332	0.7129	0.6727	-0.0402	NA	1
618	IPP	11.5613	11.1945	0.0972	1	NC	No	No	3	IPP_exon_chr1:45700190	0.4956	0.4286	-0.0669	NA	3	60.02	73.97	13.95	NA
619	IPP									IPP_exon_chr1:45717017	0.314	0.2669	-0.0471	NA	1
620	IPP									IPP_exon_chr1:45741332	0.1904	0.3045	0.1141	NA	1
621	MAST2	154.018	193.375	0.3168	0.170085	NC	No	No	1	MAST2_exon_chr1:46034072	1	1	0	NA	1
622	AL358075.4	19.4683	19.0926	-0.031	1	NC	No	No	1	AL358075.4_exon_chr1:46043871	1	1	0	NA	1
623	TSPAN1	47.7906	31.3691	-0.6444	0.540393	NC	No	No	1	TSPAN1_exon_chr1:46184190	1	1	0	NA	2	91.99	96.34	4.35	NA
624	POMGNT1	196.867	215.601	0.1462	0.635967	NC	No	No	1	POMGNT1_exon_chr1:46189567	1	1	0	NA	1
625	LRRC41	85.3191	89.6017	0.0943	1	NC	No	No	2	LRRC41_exon_chr1:46279084	0.906	0.8857	-0.0203	NA	1
626	LRRC41									LRRC41_exon_chr1:46284430	0.077	0.0928	0.0158	NA	2	18.22	21.37	3.15	NA
627	RAD54L	308.834	241.615	-0.33	0.0535926	NC	No	No	1	RAD54L_exon_chr1:46278071	1	1	0	NA	1
628	UQCRH	2144.26	2023.98	-0.082	0.338943	NC	No	No	1	UQCRH_exon_chr1:46316551	1	1	0	NA	1
629	NSUN4	157.201	132.297	-0.2899	0.412421	NC	No	No	1	NSUN4_exon_chr1:46361569	1	1	0	NA	4	22.52	22.27	-0.24	NA
630	FAAH	76.7137	80.0241	0.0982	1	NC	No	No	1	FAAH_exon_chr1:46413446	1	1	0	NA	1
631	FAAHP1	32.1902	21.9706	-0.5779	1	NC	No	No	2	FAAHP1_exon_chr1:46445198	0.1259	0.1239	-0.002	NA	1
632	FAAHP1									FAAHP1_exon_chr1:46482209	0.8741	0.8761	0.002	NA	1
633	MKNK1	74.5595	70.8162	-0.0693	1	NC	No	No	3	MKNK1_exon_chr1:46558800	0.6096	0.6319	0.0223	NA	1
634	MKNK1									MKNK1_exon_chr1:46576654	0.3372	0.2578	-0.0794	NA	2	12.63	6.16	-6.48	NA
635	MKNK1									MKNK1_exon_chr1:46580627	0.0532	0.1103	0.0571	NA	1
636	MOB3C	54.7113	53.7378	-0.0057	1	NC	No	No	1	MOB3C_exon_chr1:46609684	1	1	0	NA	1
637	ATPAF1	425.078	417.307	-0.0202	1	NC	No	No	1	ATPAF1_exon_chr1:46635970	1	1	0	NA	3	11.17	12.56	1.39	NA
638	EFCAB14	147.274	223.98	0.5884	0.00107957	UP	No	No	1	EFCAB14_exon_chr1:46678636	1	1	0	NA	8	83.18	84.52	1.34	NA
639	STIL	72.4772	63.2392	-0.1709	1	NC	No	No	1	STIL_exon_chr1:47251922	1	1	0	NA	1
640	CMPK1	182.541	177.133	0.0006	1	NC	No	No	1	CMPK1_exon_chr1:47376703	1	1	0	NA	5	54.62	62.59	7.97	NA
641	FOXD2	21.3832	16.2699	-0.437	1	NC	No	No	1	FOXD2_exon_chr1:47436016	1	1	0	NA	1
642	SPATA6	8.0616	11.3485	0.3836	1	NC	No	No	2	SPATA6_exon_chr1:48298893	0.8171	0.9596	0.1425	NA	5	74.21	47.18	-27.03	NA
643	SPATA6									SPATA6_exon_chr1:48399644	0.1829	0.0404	-0.1425	NA	1
644	FAF1	311.783	307.148	-0.023	1	NC	No	No	1	FAF1_exon_chr1:50441523	1	1	0	NA	1
645	CDKN2C	20.3398	23.4725	0.2087	1	NC	No	No	1	CDKN2C_exon_chr1:50973892	1	1	0	NA	2	82.76	95.08	12.32	NA
646	RNF11	115.461	130.16	0.1998	0.640751	NC	No	No	1	RNF11_exon_chr1:51271150	1	1	0	NA	10	77.22	80.82	3.61	NA
647	TTC39A	60.2373	73.4116	0.2954	0.888735	NC	No	No	1	TTC39A_exon_chr1:51288280	1	1	0	NA	6	65.4	60.67	-4.73	NA
648	EPS15	152.808	185.868	0.2963	0.268906	NC	No	No	1	EPS15_exon_chr1:51356846	1	1	0	NA	6	38.91	41.37	2.47	NA
649	OSBPL9	110.754	129.915	0.1948	0.868534	NC	No	No	1	OSBPL9_exon_chr1:51787714	1	1	0	NA	8	32.88	29.55	-3.33	NA
650	NRDC	762.848	857.134	0.1629	0.21272	NC	No	No	2	NRDC_exon_chr1:51789433	0.7763	0.8066	0.0303	NA	1
651	NRDC									NRDC_exon_chr1:51840514	0.2185	0.1892	-0.0293	NA	3	58.18	50.47	-7.72	NA
652	RAB3B	92.9622	128.862	0.4476	0.142441	NC	No	No	1	RAB3B_exon_chr1:51920114	1	1	0	NA	11	45.8	38.3	-7.51	NA
653	AL445685.3	467.145	441.284	-0.0746	0.793452	NC	No	No	2	AL445685.3_exon_chr1:52021012	0.9272	0.941	0.0139	NA	4	93.74	94.53	0.79	NA
654	AL445685.3									AL445685.3_exon_chr1:52034051	0.0728	0.059	-0.0139	NA	1
655	BTF3L4	351.732	351.12	-0.0139	1	NC	No	No	1	BTF3L4_exon_chr1:52086111	1	1	0	NA	7	43.01	44.09	1.08	NA
656	CC2D1B	242.132	282.874	0.2319	0.282561	NC	No	No	1	CC2D1B_exon_chr1:52353647	1	1	0	NA	1
657	ZFYVE9	167.217	175.714	0.0735	0.957943	NC	No	No	1	ZFYVE9_exon_chr1:52346059	1	1	0	NA	1
658	ORC1	125.62	114.173	-0.1011	1	NC	No	No	1	ORC1_exon_chr1:52373375	1	1	0	NA	1
659	PRPF38A	217.886	210.029	-0.0408	1	NC	No	No	1	PRPF38A_exon_chr1:52416647	1	1	0	NA	9	28.54	23.89	-4.65	NA
660	TUT4	110.51	121.471	0.116	1	NC	No	No	4	TUT4_exon_chr1:52425507	0.4452	0.52	0.0747	NA	2	40.15	32.5	-7.65	NA
661	TUT4									TUT4_exon_chr1:52475535	0.2737	0.2008	-0.0729	NA	1
662	TUT4									TUT4_exon_chr1:52477882	0.1502	0.0926	-0.0576	NA	1
663	TUT4									TUT4_exon_chr1:52509712	0.0355	0.0672	0.0317	NA	1
664	COA7	327.623	352.936	0.1134	0.65091	NC	No	No	1	COA7_exon_chr1:52688168	1	1	0	NA	10	80.07	80.31	0.24	NA
665	ZYG11B	53.7561	83.9528	0.6232	0.125704	NC	No	No	1	ZYG11B_exon_chr1:52821438	1	1	0	NA	2	85.13	91.39	6.26	NA
666	ECHDC2	62.1242	69.1026	0.1565	1	NC	No	No	1	ECHDC2_exon_chr1:52902041	1	1	0	NA	2	11.92	16.38	4.46	NA
667	AC099677.1	12.338	6.769	-0.9063	1	NC	No	No	1	AC099677.1_exon_chr1:52920421	1	1	0	NA	1
668	SCP2	205.617	198.001	-0.0551	1	NC	No	No	1	SCP2_exon_chr1:53047857	1	1	0	NA	6	86.7	86.74	0.04	NA
669	CZIB	118.145	122.999	0.024	1	NC	No	No	1	CZIB_exon_chr1:53214736	1	1	0	NA	3	86.23	85.35	-0.89	NA
670	CPT2	263.482	260.867	-0.0157	1	NC	No	No	1	CPT2_exon_chr1:53213263	1	1	0	NA	1
671	MAGOH	1120.92	1230.76	0.14	0.177886	NC	No	No	1	MAGOH_exon_chr1:53227144	1	1	0	NA	1
672	LRP8	307.598	362.415	0.2368	0.215492	NC	No	No	2	LRP8_exon_chr1:53247056	0.9138	0.8943	-0.0195	NA	6	44.43	43.28	-1.15	NA
673	LRP8									LRP8_exon_chr1:53250862	0.0733	0.0889	0.0156	NA	1
674	NDC1	285.272	270.125	-0.06	0.868413	NC	No	No	1	NDC1_exon_chr1:53768033	1	1	0	NA	9	75.87	74.07	-1.8	NA
675	YIPF1	91.8039	77.6836	-0.1913	1	NC	No	No	1	YIPF1_exon_chr1:53852270	1	1	0	NA	2	87.34	95.15	7.81	NA
676	HSPB11	150.01	141.581	-0.1129	0.878058	NC	No	No	2	HSPB11_exon_chr1:53917116	0.0843	0.0653	-0.019	NA	1
677	HSPB11									HSPB11_exon_chr1:53921767	0.9157	0.9347	0.019	NA	1
678	LRRC42	748.365	793.169	0.0966	0.448498	NC	No	No	1	LRRC42_exon_chr1:53967664	1	1	0	NA	1
679	TMEM59	386.193	387.704	0.0107	0.958872	NC	No	No	1	TMEM59_exon_chr1:54032305	1	1	0	NA	4	72.92	70.51	-2.41	NA
680	AL353898.1	257.309	257.626	0.0192	1	NC	No	No	1	AL353898.1_exon_chr1:54089855	1	1	0	NA	1
681	TCEANC2	41.719	40.7752	-0.0097	1	NC	No	No	1	TCEANC2_exon_chr1:54096284	1	1	0	NA	4	75.7	82.16	6.46	NA
682	AL357673.1	14.5867	13.3832	-0.2445	1	NC	No	No	2	AL357673.1_exon_chr1:54133294	0.1257	0.1983	0.0726	NA	1
683	AL357673.1									AL357673.1_exon_chr1:54174822	0.8743	0.8017	-0.0726	NA	3	77.54	83.88	6.34	NA
684	MRPL37	442.722	411.872	-0.1095	0.53769	NC	No	No	1	MRPL37_exon_chr1:54218171	1	1	0	NA	1
685	SSBP3	147.225	140.739	-0.0561	1	NC	No	No	1	SSBP3_exon_chr1:54227160	1	1	0	NA	6	50.28	46.17	-4.1	NA
686	AC099796.1	42.0997	45.1393	0.0303	1	NC	No	No	1	AC099796.1_exon_chr1:54524823	1	1	0	NA	1
687	ACOT11	46.1821	48.4358	0.0218	1	NC	No	No	1	ACOT11_exon_chr1:54608956	1	1	0	NA	2	15.85	9.46	-6.39	NA
688	TTC4	15.2764	9.648	-0.5351	1	NC	No	No	2	TTC4_exon_chr1:54717491	0.8544	0.8779	0.0235	NA	2	11.62	36.03	24.41	NA
689	TTC4									TTC4_exon_chr1:54728345	0.1456	0.1221	-0.0235	NA	1
690	MROH7-TTC4	84.1721	102.594	0.284	0.728061	NC	No	No	1	MROH7-TTC4_exon_chr1:54741410	1	1	0	NA	4	28.03	28.88	0.85	NA
691	PARS2	16.3461	19.9011	0.2849	1	NC	No	No	1	PARS2_exon_chr1:54759190	1	1	0	NA	1
692	TTC22	6.5051	6.5243	-0.1087	1	NC	No	No	1	TTC22_exon_chr1:54781779	1	1	0	NA	1
693	DHCR24	363.297	336.64	-0.1417	0.585209	NC	No	No	1	DHCR24_exon_chr1:54853612	1	1	0	NA	1
694	DHCR24-DT	6.9241	5.3555	-0.5801	1	NC	No	No	1	DHCR24-DT_exon_chr1:54888499	1	1	0	NA	1
695	TMEM61	11.1344	16.7477	0.5882	1	NC	No	No	1	TMEM61_exon_chr1:54991835	1	1	0	NA	1
696	PCSK9	104.814	88.5755	-0.2998	0.706228	NC	No	No	1	PCSK9_exon_chr1:55063368	1	1	0	NA	1
697	USP24	108.239	121.958	0.1963	0.791858	NC	No	No	1	USP24_exon_chr1:55069107	1	1	0	NA	6	58.44	61.61	3.17	NA
698	AC099789.1	1857.51	1666.92	-0.1601	0.111657	NC	No	No	1	AC099789.1_exon_chr1:56619549	1	1	0	NA	1
699	PRKAA2	21.9868	18.7118	-0.1944	1	NC	No	No	1	PRKAA2_exon_chr1:56707474	1	1	0	NA	6	76.43	79.72	3.29	NA
700	RPS26P15	3230.31	3083.52	-0.0691	0.467229	NC	No	No	1	RPS26P15_exon_chr1:58056480	1	1	0	NA	1
701	OMA1	23.5226	34.42	0.4796	1	NC	No	No	1	OMA1_exon_chr1:58481174	1	1	0	NA	3	86.15	78.27	-7.88	NA
702	TACSTD2	8.3777	6.5092	-0.3528	1	NC	No	No	1	TACSTD2_exon_chr1:58577252	1	1	0	NA	1
703	MYSM1	66.8229	45.8101	-0.5021	0.409861	NC	No	No	1	MYSM1_exon_chr1:58660155	1	1	0	NA	4	86.96	82.36	-4.6	NA
704	JUN	69.9678	81.6822	0.1845	1	NC	No	No	1	JUN_exon_chr1:58784047	1	1	0	NA	5	55.69	60.64	4.95	NA
705	HOOK1	101.493	102.088	0.0368	1	NC	No	No	2	HOOK1_exon_chr1:59848314	0.3565	0.4289	0.0724	NA	1
706	HOOK1									HOOK1_exon_chr1:59872794	0.6435	0.5711	-0.0724	NA	7	72.91	78.19	5.28	NA
707	NFIA	74.3363	84.3023	0.1815	1	NC	No	No	2	NFIA_exon_chr1:61088148	0.1313	0.1358	0.0045	NA	2	27.81	19.48	-8.33	NA
708	NFIA									NFIA_exon_chr1:61455302	0.8687	0.8642	-0.0045	NA	4	89.66	88.74	-0.92	NA
709	TM2D1	41.9594	38.2851	-0.0564	1	NC	No	No	2	TM2D1_exon_chr1:61681350	0.7511	0.6951	-0.0559	NA	1
710	TM2D1									TM2D1_exon_chr1:61700274	0.2489	0.3049	0.0559	NA	1
711	PATJ	57.3961	60.3621	0.0779	1	NC	No	No	2	PATJ_exon_chr1:62117131	0.3542	0.3426	-0.0117	NA	2	100	88.62	-11.38	NA
712	PATJ									PATJ_exon_chr1:62160907	0.6268	0.6325	0.0057	NA	5	34.12	31.54	-2.58	NA
713	USP1	388.422	425.241	0.1184	0.631218	NC	No	No	2	USP1_exon_chr1:62444737	0.6225	0.5985	-0.024	NA	3	52.52	54.69	2.17	NA
714	USP1									USP1_exon_chr1:62450245	0.3775	0.4015	0.024	NA	5	27.9	29.56	1.66	NA
715	DOCK7	31.4427	29.4447	-0.0837	1	NC	No	No	1	DOCK7_exon_chr1:62455456	1	1	0	NA	2	17.58	20.57	2.99	NA
716	ATG4C	70.0826	64.8557	-0.1026	1	NC	No	No	1	ATG4C_exon_chr1:62863991	1	1	0	NA	7	74.42	69.1	-5.31	NA
717	FOXD3-AS1	12.0497	12.5907	0.0165	1	NC	No	No	1	FOXD3-AS1_exon_chr1:63321190	1	1	0	NA	1
718	ALG6	148.359	125.15	-0.2205	0.631328	NC	No	No	1	ALG6_exon_chr1:63436822	1	1	0	NA	1
719	ITGB3BP	325.11	267.311	-0.2813	0.0993322	NC	No	No	2	ITGB3BP_exon_chr1:63441103	0.8467	0.8272	-0.0195	NA	1
720	ITGB3BP									ITGB3BP_exon_chr1:63490218	0.1128	0.1348	0.022	NA	1
721	EFCAB7	11.6483	7.4066	-0.6047	1	NC	No	No	2	EFCAB7_exon_chr1:63551724	0.1587	0.0819	-0.0767	NA	1
722	EFCAB7									EFCAB7_exon_chr1:63572441	0.8105	0.867	0.0564	NA	1
723	PGM1	181.674	126.426	-0.4772	0.0318946	DOWN	No	No	1	PGM1_exon_chr1:63659585	1	1	0	NA	1
724	ROR1	10.5339	7.3798	-0.4025	1	NC	No	No	1	ROR1_exon_chr1:64177427	1	1	0	NA	4	34.86	24.29	-10.57	NA
725	CACHD1	25.119	27.0134	0.0016	1	NC	No	No	1	CACHD1_exon_chr1:64691322	1	1	0	NA	1
726	RAVER2	80.2142	69.9066	-0.1606	1	NC	No	No	1	RAVER2_exon_chr1:64830838	1	1	0	NA	7	59.16	61.48	2.32	NA
727	JAK1	203.341	248.725	0.2746	0.239382	NC	Yes	No	3	JAK1_exon_chr1:64834657	0.4357	0.5462	0.1105	Up	1
728	JAK1									JAK1_exon_chr1:64864972	0.4031	0.3206	-0.0825	NA	2	91.2	91.45	0.25	NA
729	JAK1									JAK1_exon_chr1:64876473	0.1612	0.1332	-0.028	NA	1
730	AK4	237.14	240.105	0.0283	1	NC	No	No	1	AK4_exon_chr1:65226062	1	1	0	NA	6	15.48	18.85	3.37	NA
731	DNAJC6	32.8939	27.8365	-0.278	1	NC	No	No	1	DNAJC6_exon_chr1:65412923	1	1	0	NA	2	96.77	92.29	-4.47	NA
732	LEPROT	56.324	57.5238	0.0823	1	NC	No	No	2	LEPROT_exon_chr1:65427781	0.0658	0.1012	0.0354	NA	1
733	LEPROT									LEPROT_exon_chr1:65431802	0.9342	0.8988	-0.0354	NA	5	43.12	47.77	4.65	NA
734	LEPR	13.3846	16.05	0.1697	1	NC	No	No	2	LEPR_exon_chr1:65633151	0.8629	0.8499	-0.013	NA	1
735	LEPR									LEPR_exon_chr1:65636190	0.1371	0.1501	0.013	NA	1
736	PDE4B	327.461	240.831	-0.4385	0.00334205	DOWN	No	No	2	PDE4B_exon_chr1:66361614	0.0995	0.0762	-0.0233	NA	1
737	PDE4B									PDE4B_exon_chr1:66372312	0.9005	0.9238	0.0233	NA	3	78.19	80.03	1.83	NA
738	WDR78	6.189	5.4409	-0.1242	1	NC	No	No	3	WDR78_exon_chr1:66814180	0.1227	0.1588	0.0361	NA	1
739	WDR78									WDR78_exon_chr1:66837796	0.1741	0.5972	0.4231	NA	1
740	WDR78									WDR78_exon_chr1:66871509	0.7032	0.244	-0.4591	NA	1
741	MIER1	64.5798	77.9349	0.2558	1	NC	No	No	4	MIER1_exon_chr1:66946149	0.0617	0.059	-0.0026	NA	1
742	MIER1									MIER1_exon_chr1:66958058	0.1617	0.1685	0.0068	NA	2	39.86	43.02	3.16	NA
743	MIER1									MIER1_exon_chr1:66963087	0.2985	0.1872	-0.1113	NA	1
744	MIER1									MIER1_exon_chr1:66984571	0.4782	0.5853	0.1071	NA	7	72.67	70.81	-1.86	NA
745	SLC35D1	55.6072	46.1856	-0.3072	0.89849	NC	No	No	1	SLC35D1_exon_chr1:67004448	1	1	0	NA	1
746	SERBP1	3533.68	3501.26	-0.0182	0.748195	NC	No	No	2	SERBP1_exon_chr1:67413263	0.6035	0.5965	-0.007	NA	22	38.09	36.23	-1.86	NA
747	SERBP1									SERBP1_exon_chr1:67430415	0.3725	0.3796	0.0071	NA	2	26.95	27.59	0.65	NA
748	GADD45A	679.967	703.897	0.0421	0.690044	NC	No	No	1	GADD45A_exon_chr1:67687660	1	1	0	NA	4	28.15	26.49	-1.66	NA
749	GNG12	269.806	249.268	-0.0924	0.831996	NC	No	No	1	GNG12_exon_chr1:67705576	1	1	0	NA	5	28.27	28.09	-0.19	NA
750	WLS	81.784	71.6072	-0.1942	1	NC	No	No	3	WLS_exon_chr1:68098753	0.3366	0.3501	0.0136	NA	1
751	WLS									WLS_exon_chr1:68126335	0.5609	0.5452	-0.0157	NA	5	21.07	22.51	1.44	NA
752	WLS									WLS_exon_chr1:68142862	0.1025	0.1047	0.0022	NA	2	13.58	6.2	-7.38	NA
753	RPS7P4	15.9414	15.3949	-0.1981	1	NC	No	No	1	RPS7P4_exon_chr1:68243055	1	1	0	NA	1
754	DEPDC1	124.46	128.618	0.0761	1	NC	No	No	1	DEPDC1_exon_chr1:68477069	1	1	0	NA	11	51.95	56.29	4.34	NA
755	AL138789.1	74.8036	112.175	0.5637	0.125441	NC	No	No	1	AL138789.1_exon_chr1:68482760	1	1	0	NA	4	38.47	32.29	-6.18	NA
756	LRRC40	136.503	135.151	0.0232	1	NC	No	No	1	LRRC40_exon_chr1:70145905	1	1	0	NA	1
757	SRSF11	3486.33	3483.68	-0.0068	0.900788	NC	No	No	4	SRSF11_exon_chr1:70237424	0.0907	0.0682	-0.0224	NA	1
758	SRSF11									SRSF11_exon_chr1:70244683	0.3621	0.3961	0.0339	NA	1
759	SRSF11									SRSF11_exon_chr1:70246729	0.1229	0.1176	-0.0053	NA	1
760	SRSF11									SRSF11_exon_chr1:70248393	0.4238	0.4178	-0.006	NA	9	27.48	27.52	0.05	NA
761	ANKRD13C	96.5695	111.313	0.2326	0.585209	NC	No	No	1	ANKRD13C_exon_chr1:70262847	1	1	0	NA	9	31.22	33.77	2.55	NA
762	HHLA3	19.9598	14.4041	-0.3307	1	NC	No	No	1	HHLA3_exon_chr1:70367616	1	1	0	NA	1
763	CTH	16.1699	20.5488	0.3973	1	NC	No	No	1	CTH_exon_chr1:70439100	1	1	0	NA	3	52.85	48.45	-4.4	NA
764	ZRANB2	216.46	229.014	0.0603	0.991105	NC	No	No	3	ZRANB2_exon_chr1:71065137	0.8671	0.8769	0.0098	NA	6	78.79	81.78	2.99	NA
765	ZRANB2									ZRANB2_exon_chr1:71070996	0.0573	0.0591	0.0019	NA	1
766	ZRANB2									ZRANB2_exon_chr1:71072548	0.0635	0.0518	-0.0117	NA	1
767	MIR186	5.8329	5.947	0.0185	1	NC	No	No	1	MIR186_exon_chr1:71067716	1	1	0	NA	2	41.67	64.79	23.12	NA
768	FPGT	23.342	26.9435	0.1936	1	NC	No	No	1	FPGT_exon_chr1:74204390	1	1	0	NA	6	61.54	63.89	2.35	NA
769	CRYZ	80.9889	101.294	0.2869	0.813185	NC	No	No	1	CRYZ_exon_chr1:74706457	1	1	0	NA	1
770	TYW3	272.618	329.502	0.2612	0.163638	NC	No	No	2	TYW3_exon_chr1:74752291	0.09	0.0623	-0.0277	NA	1
771	TYW3									TYW3_exon_chr1:74763892	0.91	0.9377	0.0277	NA	9	52.37	53.03	0.66	NA
772	ACADM	166.011	178.726	0.0882	0.857764	NC	No	No	1	ACADM_exon_chr1:75762691	1	1	0	NA	7	69.75	71.12	1.37	NA
773	RABGGTB	294.403	401.596	0.4537	0.00055425	UP	No	No	1	RABGGTB_exon_chr1:75794509	1	1	0	NA	2	55.28	51.29	-4	NA
774	ST6GALNAC5	6.1028	11.2908	0.7745	1	NC	No	No	1	ST6GALNAC5_exon_chr1:77062974	1	1	0	NA	1
775	PIGK	102.83	91.5572	-0.1556	1	NC	No	No	1	PIGK_exon_chr1:77092490	1	1	0	NA	7	60.8	63.83	3.04	NA
776	AC113935.1	607.129	610.834	-0.0074	0.915441	NC	No	No	1	AC113935.1_exon_chr1:77129113	1	1	0	NA	1
777	AC118549.1	105.385	93.3095	-0.2357	0.733231	NC	No	No	2	AC118549.1_exon_chr1:77565784	0.7624	0.6861	-0.0764	NA	5	20.35	17.08	-3.27	NA
778	AC118549.1									AC118549.1_exon_chr1:77633405	0.2241	0.2863	0.0622	NA	1
779	USP33	301.966	353.953	0.2326	0.25909	NC	No	No	1	USP33_exon_chr1:77697931	1	1	0	NA	1
780	AC138392.1	22.8696	26.774	0.202	1	NC	No	No	1	AC138392.1_exon_chr1:77811781	1	1	0	NA	2	31.48	36.51	5.03	NA
781	NSRP1P1	50.1491	49.1705	-0.0358	1	NC	No	No	1	NSRP1P1_exon_chr1:77847109	1	1	0	NA	4	24.53	28.81	4.28	NA
782	MIGA1	75.5775	62.143	-0.2242	1	NC	No	No	1	MIGA1_exon_chr1:77874845	1	1	0	NA	5	93.49	94.18	0.69	NA
783	FUBP1	392.714	448.527	0.1831	0.31904	NC	No	No	3	FUBP1_exon_chr1:77944269	0.0971	0.0794	-0.0177	NA	1
784	FUBP1									FUBP1_exon_chr1:77949300	0.4828	0.5767	0.0939	NA	1
785	FUBP1									FUBP1_exon_chr1:77964356	0.4192	0.3409	-0.0783	NA	1
786	AC103591.3	37.7461	25.1283	-0.5764	1	NC	No	No	1	AC103591.3_exon_chr1:78004554	1	1	0	NA	1
787	DNAJB4	94.0238	118.755	0.3262	0.350726	NC	No	No	1	DNAJB4_exon_chr1:78016013	1	1	0	NA	8	52.5	46.52	-5.98	NA
788	TTLL7	84.6027	88.5148	0.0237	1	NC	No	No	2	TTLL7_exon_chr1:83870082	0.6492	0.609	-0.0402	NA	9	62.42	55.91	-6.51	NA
789	TTLL7									TTLL7_exon_chr1:83911363	0.3336	0.3845	0.0509	NA	1
790	AL359504.2	13.4261	9.3295	-0.5772	1	NC	No	No	1	AL359504.2_exon_chr1:84077931	1	1	0	NA	2	6.06	16.6	10.54	NA
791	PRKACB	726.046	569.059	-0.3437	0.000599526	NC	No	No	1	PRKACB_exon_chr1:84235179	1	1	0	NA	1
792	AL359273.2	25.7019	11.2995	-1.137	1	NC	No	No	1	AL359273.2_exon_chr1:84349630	1	1	0	NA	1
793	AL844170.1	23.881	16.0543	-0.6097	1	NC	No	No	1	AL844170.1_exon_chr1:84478866	1	1	0	NA	1
794	RPF1	1516.75	1330.59	-0.1881	0.0627419	NC	No	No	2	RPF1_exon_chr1:84480955	0.7282	0.7037	-0.0245	NA	1
795	RPF1									RPF1_exon_chr1:84497428	0.2718	0.2963	0.0245	NA	3	11.73	9.46	-2.26	NA
796	AL359762.3	1087.66	1186.19	0.1271	0.202581	NC	No	No	1	AL359762.3_exon_chr1:84498548	1	1	0	NA	1
797	SSX2IP	204.176	177.255	-0.2227	0.384726	NC	No	No	2	SSX2IP_exon_chr1:84647607	0.7148	0.7443	0.0296	NA	13	64.12	66.85	2.73	NA
798	SSX2IP									SSX2IP_exon_chr1:84664552	0.2708	0.2208	-0.05	NA	1
799	LPAR3	52.3159	44.2166	-0.2592	1	NC	No	No	1	LPAR3_exon_chr1:84814171	1	1	0	NA	3	94.48	94.01	-0.47	NA
800	MCOLN2	27.4805	30.0482	0.1783	1	NC	No	No	1	MCOLN2_exon_chr1:84926721	1	1	0	NA	1
801	MCOLN3	39.2324	27.107	-0.4391	1	NC	No	No	1	MCOLN3_exon_chr1:85019257	1	1	0	NA	4	83.02	80.93	-2.08	NA
802	C1orf52	79.4388	87.9514	0.1641	1	NC	No	No	1	C1orf52_exon_chr1:85252702	1	1	0	NA	7	26.85	28.1	1.26	NA
803	BCL10	27.0622	48.3591	0.8	0.193569	NC	No	No	1	BCL10_exon_chr1:85267982	1	1	0	NA	7	12.58	8.47	-4.11	NA
804	DDAH1	65.9785	62.8317	-0.0264	1	NC	No	No	1	DDAH1_exon_chr1:85321568	1	1	0	NA	1
805	CCN1	225.046	284.403	0.3371	0.0629628	NC	No	No	1	CCN1_exon_chr1:85582739	1	1	0	NA	1
806	ZNHIT6	164.97	166.955	-0.0202	1	NC	No	No	2	ZNHIT6_exon_chr1:85654098	0.5278	0.5354	0.0076	NA	1
807	ZNHIT6									ZNHIT6_exon_chr1:85708433	0.4679	0.452	-0.0159	NA	4	39.51	37.16	-2.35	NA
808	ODF2L	115.805	115.066	0.0259	1	NC	No	No	2	ODF2L_exon_chr1:86352208	0.6	0.5699	-0.0301	NA	7	40.75	48.18	7.44	NA
809	ODF2L									ODF2L_exon_chr1:86358891	0.3522	0.38	0.0278	NA	1
810	SH3GLB1	121.394	134.036	0.1794	0.797281	NC	No	No	1	SH3GLB1_exon_chr1:86743127	1	1	0	NA	9	24.41	26.56	2.15	NA
811	AL049597.1	39.3249	43.9733	0.1175	1	NC	No	No	1	AL049597.1_exon_chr1:86784912	1	1	0	NA	1
812	SELENOF	730.249	724.481	-0.0096	0.816295	NC	No	No	1	SELENOF_exon_chr1:86863605	1	1	0	NA	5	29.48	27.18	-2.3	NA
813	HS2ST1	128.869	123.113	-0.0232	1	NC	No	No	1	HS2ST1_exon_chr1:87104469	1	1	0	NA	13	42.45	44.52	2.08	NA
814	LMO4	149.092	143.873	-0.0123	1	NC	No	No	1	LMO4_exon_chr1:87344787	1	1	0	NA	8	66.35	64.82	-1.53	NA
815	PKN2	118.515	116.469	-0.0329	1	NC	No	No	2	PKN2_exon_chr1:88740987	0.1778	0.19	0.0122	NA	2	44.19	52.07	7.87	NA
816	PKN2									PKN2_exon_chr1:88833244	0.8222	0.81	-0.0122	NA	8	79.96	75.67	-4.29	NA
817	GTF2B	90.6389	101.233	0.1906	1	NC	No	No	1	GTF2B_exon_chr1:88853346	1	1	0	NA	1
818	KYAT3	51.4914	48.5459	-0.0438	1	NC	No	No	1	KYAT3_exon_chr1:88936245	1	1	0	NA	2	87.92	78.95	-8.97	NA
819	RBMXL1	42.2433	47.6132	0.1846	1	NC	No	No	1	RBMXL1_exon_chr1:88984066	1	1	0	NA	7	43.66	37.97	-5.69	NA
820	LRRC8B	24.7223	30.4759	0.3756	1	NC	No	No	1	LRRC8B_exon_chr1:89592770	1	1	0	NA	5	58.88	57.74	-1.14	NA
821	LRRC8C	70.685	56.8436	-0.2812	1	NC	No	No	1	LRRC8C_exon_chr1:89712708	1	1	0	NA	4	58.64	51.39	-7.25	NA
822	AC093423.3	27.3605	22.1279	-0.2215	1	NC	No	No	1	AC093423.3_exon_chr1:89933066	1	1	0	NA	1
823	ZNF326	404.633	425.111	0.052	0.78722	NC	No	No	4	ZNF326_exon_chr1:90010087	0.0618	0.0564	-0.0054	NA	1
824	ZNF326									ZNF326_exon_chr1:90013125	0.2503	0.1922	-0.0581	NA	2	54.25	57.39	3.15	NA
825	ZNF326									ZNF326_exon_chr1:90017316	0.2661	0.2541	-0.012	NA	1
826	ZNF326									ZNF326_exon_chr1:90027353	0.4165	0.4919	0.0753	NA	11	17.85	18.37	0.52	NA
827	LINC02609	13.8283	14.213	-0.0973	1	NC	No	No	2	LINC02609_exon_chr1:90783423	0.2146	0.2805	0.0659	NA	2	30.45	24.08	-6.36	NA
828	LINC02609									LINC02609_exon_chr1:90832201	0.7854	0.7195	-0.0659	NA	5	21.17	22.22	1.05	NA
829	ZNF644	229.146	244.741	0.1051	0.778911	NC	No	No	3	ZNF644_exon_chr1:90916990	0.6074	0.577	-0.0304	NA	7	59.54	62.61	3.07	NA
830	ZNF644									ZNF644_exon_chr1:90938090	0.1852	0.1807	-0.0044	NA	1
831	ZNF644									ZNF644_exon_chr1:90941309	0.1677	0.2125	0.0447	NA	3	31.74	36.06	4.31	NA
832	CDC7	52.0174	54.3364	0.1332	1	NC	No	No	2	CDC7_exon_chr1:91513057	0.2157	0.1407	-0.075	NA	1
833	CDC7									CDC7_exon_chr1:91524040	0.7843	0.8593	0.075	NA	4	64.09	72.35	8.26	NA
834	TGFBR3	19.3483	24.5734	0.3257	1	NC	No	No	1	TGFBR3_exon_chr1:91683857	1	1	0	NA	1
835	EPHX4	8.7992	13.1103	0.5116	1	NC	No	No	1	EPHX4_exon_chr1:92063054	1	1	0	NA	4	35.54	37.48	1.94	NA
836	SETSIP	11.8759	11.2979	0.0017	1	NC	No	No	1	SETSIP_exon_chr1:92075441	1	1	0	NA	1
837	GLMN	99.0382	76.7334	-0.3367	0.950408	NC	No	No	2	GLMN_exon_chr1:92246646	0.9341	0.9565	0.0224	NA	1
838	GLMN									GLMN_exon_chr1:92298029	0.0659	0.0435	-0.0224	NA	1
839	RPAP2	103.866	110.733	0.1163	0.892877	NC	No	No	1	RPAP2_exon_chr1:92387010	1	1	0	NA	15	24.83	23.4	-1.43	NA
840	GFI1	44.9425	50.6884	0.2014	1	NC	No	No	1	GFI1_exon_chr1:92476207	1	1	0	NA	1
841	EVI5	51.6665	47.2063	-0.1523	1	NC	No	No	2	EVI5_exon_chr1:92513970	0.7899	0.6886	-0.1013	NA	2	66.82	58.95	-7.87	NA
842	EVI5									EVI5_exon_chr1:92704744	0.2101	0.3114	0.1013	NA	1
843	RPL5	21861.3	19589	-0.1588	0.00386026	NC	No	No	2	RPL5_exon_chr1:92840524	0.4094	0.3655	-0.0439	NA	1
844	RPL5									RPL5_exon_chr1:92841765	0.589	0.6328	0.0437	NA	1
845	DIPK1A	21.1133	24.485	0.1982	1	NC	No	No	1	DIPK1A_exon_chr1:92844195	1	1	0	NA	6	76.8	82.23	5.42	NA
846	MTF2	103.26	139.272	0.4583	0.0728453	NC	No	No	2	MTF2_exon_chr1:93133702	0.2385	0.2139	-0.0246	NA	1
847	MTF2									MTF2_exon_chr1:93136669	0.7615	0.7861	0.0246	NA	8	44.77	47.54	2.77	NA
848	TMED5	241.957	236.144	-0.0225	1	NC	No	No	1	TMED5_exon_chr1:93154888	1	1	0	NA	7	55.07	57.31	2.24	NA
849	CCDC18	298.575	285.61	-0.0826	0.768673	NC	No	No	8	CCDC18_exon_chr1:93201891	0.0537	0.1011	0.0474	NA	2	29.74	20.04	-9.7	NA
850	CCDC18									CCDC18_exon_chr1:93205509	0.1153	0.0666	-0.0487	NA	1
851	CCDC18									CCDC18_exon_chr1:93207106	0.1123	0.0921	-0.0202	NA	1
852	CCDC18									CCDC18_exon_chr1:93221608	0.164	0.1559	-0.0081	NA	1
853	CCDC18									CCDC18_exon_chr1:93226332	0.045	0.0687	0.0237	NA	1
854	CCDC18									CCDC18_exon_chr1:93236247	0.1383	0.1501	0.0119	NA	3	41.75	35.88	-5.87	NA
855	CCDC18									CCDC18_exon_chr1:93239309	0.172	0.1596	-0.0124	NA	2	30.69	24.87	-5.83	NA
856	CCDC18									CCDC18_exon_chr1:93264700	0.0863	0.0863	0	NA	1
857	DR1	244.392	258.81	0.0728	0.917452	NC	No	No	1	DR1_exon_chr1:93360492	1	1	0	NA	21	34.19	37.01	2.82	NA
858	FNBP1L	92.1854	104.244	0.1771	1	NC	No	No	3	FNBP1L_exon_chr1:93524260	0.1691	0.1239	-0.0452	NA	1
859	FNBP1L									FNBP1L_exon_chr1:93530754	0.2757	0.2658	-0.0099	NA	1
860	FNBP1L									FNBP1L_exon_chr1:93550946	0.5203	0.5685	0.0483	NA	1
861	BCAR3	69.7246	99.1071	0.501	0.21633	NC	No	No	1	BCAR3_exon_chr1:93562419	1	1	0	NA	1
862	DNTTIP2	654.917	725.859	0.1392	0.358583	NC	No	No	4	DNTTIP2_exon_chr1:93869944	0.5572	0.5612	0.004	NA	1
863	DNTTIP2									DNTTIP2_exon_chr1:93872236	0.0837	0.0855	0.0018	NA	3	82.13	82.26	0.13	NA
864	DNTTIP2									DNTTIP2_exon_chr1:93873369	0.0534	0.0507	-0.0026	NA	2	94.13	94.91	0.79	NA
865	DNTTIP2									DNTTIP2_exon_chr1:93877883	0.2754	0.2534	-0.022	NA	4	84.15	83.41	-0.74	NA
866	GCLM	159.262	200.88	0.328	0.142093	NC	No	No	1	GCLM_exon_chr1:93889159	1	1	0	NA	14	35.02	30.87	-4.15	NA
867	ARHGAP29	1301.72	1437.29	0.14	0.56533	NC	No	No	3	ARHGAP29_exon_chr1:94174749	0.105	0.1254	0.0204	NA	23	33.39	29.91	-3.49	NA
868	ARHGAP29									ARHGAP29_exon_chr1:94202732	0.6192	0.6272	0.0081	NA	3	85.5	87.73	2.23	NA
869	ARHGAP29									ARHGAP29_exon_chr1:94202998	0.2158	0.1973	-0.0184	NA	1
870	ABCD3	183.719	192.65	0.0438	1	NC	No	No	2	ABCD3_exon_chr1:94478523	0.1851	0.1867	0.0016	NA	1
871	ABCD3									ABCD3_exon_chr1:94517051	0.8149	0.8133	-0.0016	NA	4	45.35	40.64	-4.71	NA
872	F3	122.9	160.173	0.4243	0.124333	NC	No	No	1	F3_exon_chr1:94530596	1	1	0	NA	1
873	SLC44A3	23.9592	25.947	0.1582	1	NC	No	No	1	SLC44A3_exon_chr1:94894817	1	1	0	NA	2	2.9	19.31	16.41	NA
874	CNN3	322.826	420.593	0.3924	0.00553552	UP	No	No	1	CNN3_exon_chr1:94898083	1	1	0	NA	4	51.74	54.5	2.75	NA
875	ALG14	38.8098	41.2472	0.1289	1	NC	No	No	1	ALG14_exon_chr1:94983633	1	1	0	NA	3	84.71	83.82	-0.89	NA
876	TLCD4	71.6749	59.2758	-0.2296	1	NC	No	No	1	TLCD4_exon_chr1:95191549	1	1	0	NA	10	48.89	53.76	4.87	NA
877	RWDD3	67.2675	70.9682	0.0788	1	NC	No	No	1	RWDD3_exon_chr1:95246755	1	1	0	NA	1
878	EEF1A1P11	29.511	35.275	0.3001	1	NC	No	No	1	EEF1A1P11_exon_chr1:96446929	1	1	0	NA	2	56.59	54.41	-2.18	NA
879	RPL7P9	12.0482	13.9867	0.2007	1	NC	No	No	1	RPL7P9_exon_chr1:96679620	1	1	0	NA	1
880	PTBP2	39.661	27.7844	-0.4275	1	NC	No	No	1	PTBP2_exon_chr1:96813272	1	1	0	NA	1
881	SEC63P1	26.88	13.5439	-1.018	1	NC	No	No	1	SEC63P1_exon_chr1:97545700	1	1	0	NA	2	69.7	56.22	-13.48	NA
882	SNX7	60.2914	46.9825	-0.4073	0.644675	NC	No	No	1	SNX7_exon_chr1:98760053	1	1	0	NA	1
883	AGL	130.003	127.647	-0.0287	1	NC	No	No	3	AGL_exon_chr1:99864385	0.3583	0.3612	0.0029	NA	1
884	AGL									AGL_exon_chr1:99912404	0.075	0.094	0.0189	NA	1
885	AGL									AGL_exon_chr1:99921533	0.5667	0.5448	-0.0219	NA	3	83.04	81.13	-1.91	NA
886	SLC35A3	57.6701	52.4127	-0.1398	1	NC	No	No	1	SLC35A3_exon_chr1:100022385	1	1	0	NA	7	74.54	58	-16.54	NA
887	AC118553.2	71.065	93.3503	0.3502	0.699924	NC	No	No	1	AC118553.2_exon_chr1:100082002	1	1	0	NA	2	77.47	80.57	3.1	NA
888	AC093019.2	33.4697	37.5033	0.2336	1	NC	No	No	1	AC093019.2_exon_chr1:100085434	1	1	0	NA	1
889	SASS6	72.5247	91.9843	0.3547	0.717776	NC	No	No	3	SASS6_exon_chr1:100107553	0.5576	0.4611	-0.0965	NA	1
890	SASS6									SASS6_exon_chr1:100110483	0.2098	0.3285	0.1187	NA	2	26.27	20.79	-5.48	NA
891	SASS6									SASS6_exon_chr1:100119137	0.2019	0.1874	-0.0145	NA	1
892	TRMT13	24.3	23.8988	0.0391	1	NC	No	No	1	TRMT13_exon_chr1:100148624	1	1	0	NA	7	87.48	84.64	-2.83	NA
893	DBT	59.0129	46.2323	-0.3699	0.820969	NC	No	No	1	DBT_exon_chr1:100196422	1	1	0	NA	9	26.62	29.49	2.87	NA
894	RTCA	205.944	170.547	-0.232	0.414499	NC	No	No	1	RTCA_exon_chr1:100291402	1	1	0	NA	3	23.36	21.6	-1.76	NA
895	CDC14A	8.9966	8.6978	-0.1359	1	NC	No	No	1	CDC14A_exon_chr1:100518250	1	1	0	NA	2	73.22	73.01	-0.21	NA
896	EXTL2	32.0471	26.5802	-0.2371	1	NC	No	No	1	EXTL2_exon_chr1:100874430	1	1	0	NA	4	65.77	69.9	4.13	NA
897	SLC30A7	54.705	60.6878	0.2086	1	NC	No	No	1	SLC30A7_exon_chr1:100974809	1	1	0	NA	7	59.71	72.07	12.36	NA
898	DPH5	108.604	115.459	0.1144	1	NC	No	No	1	DPH5_exon_chr1:100990631	1	1	0	NA	2	41.96	40.88	-1.08	NA
899	AC093157.1	46.4352	42.937	-0.0967	1	NC	No	No	1	AC093157.1_exon_chr1:101086851	1	1	0	NA	1
900	RPSAP19	23830.1	21757.1	-0.1308	0.0409861	NC	No	No	1	RPSAP19_exon_chr1:101787219	1	1	0	NA	1
901	AMY2B	15.5925	17.0139	-0.0274	1	NC	No	No	2	AMY2B_exon_chr1:103553273	0.9544	0.8864	-0.068	NA	1
902	AMY2B									AMY2B_exon_chr1:103579310	0.0456	0.1136	0.068	NA	1
903	PRMT6	24.8821	19.5781	-0.3154	1	NC	No	No	1	PRMT6_exon_chr1:107056673	1	1	0	NA	2	84.98	95.51	10.53	NA
904	SLC25A24	131.45	124.279	-0.0643	1	NC	No	No	2	SLC25A24_exon_chr1:108136837	0.8341	0.8569	0.0228	NA	1
905	SLC25A24									SLC25A24_exon_chr1:108185954	0.1551	0.1431	-0.012	NA	1
906	FAM102B	24.6697	20.1035	-0.2784	1	NC	No	No	1	FAM102B_exon_chr1:108635107	1	1	0	NA	1
907	PRPF38B	2485.45	2324.5	-0.0988	0.684315	NC	No	No	1	PRPF38B_exon_chr1:108699161	1	1	0	NA	20	45.53	45.11	-0.41	NA
908	STXBP3	92.3879	103.053	0.1816	0.773381	NC	No	No	1	STXBP3_exon_chr1:108808782	1	1	0	NA	1
909	GPSM2	286.823	260.842	-0.1106	0.778911	NC	No	No	2	GPSM2_exon_chr1:108923999	0.0832	0.0369	-0.0463	NA	1
910	GPSM2									GPSM2_exon_chr1:108929700	0.9091	0.9602	0.0511	NA	9	8.26	5.5	-2.76	NA
911	CLCC1	34.7375	34.6952	0.0211	1	NC	No	No	2	CLCC1_exon_chr1:108932501	0.8944	0.9508	0.0564	NA	3	31.99	32.37	0.38	NA
912	CLCC1									CLCC1_exon_chr1:108947718	0.1056	0.0492	-0.0564	NA	1
913	WDR47	24.9165	17.8723	-0.4545	1	NC	No	No	1	WDR47_exon_chr1:108971572	1	1	0	NA	1
914	BX679664.3	10256.2	9316.73	-0.1381	0.0629411	NC	No	No	1	BX679664.3_exon_chr1:108992281	1	1	0	NA	1
915	TAF13	214.469	232.28	0.1165	0.762746	NC	No	No	2	TAF13_exon_chr1:109063072	0.9355	0.9408	0.0053	NA	1
916	TAF13									TAF13_exon_chr1:109075065	0.0561	0.0533	-0.0028	NA	1
917	TMEM167B	51.6019	69.3611	0.4053	0.761277	NC	No	No	1	TMEM167B_exon_chr1:109094416	1	1	0	NA	3	80.46	82.83	2.37	NA
918	SARS	1101.4	1033.46	-0.0928	0.408425	NC	No	No	2	SARS_exon_chr1:109223977	0.1297	0.1045	-0.0252	NA	1
919	SARS									SARS_exon_chr1:109237730	0.851	0.8744	0.0234	NA	1
920	CELSR2	15.3203	12.3736	-0.2849	1	NC	No	No	1	CELSR2_exon_chr1:109273165	1	1	0	NA	1
921	PSRC1	141.27	131.437	-0.0844	0.964565	NC	No	No	2	PSRC1_exon_chr1:109280156	0.9464	0.9527	0.0063	NA	1
922	PSRC1									PSRC1_exon_chr1:109282419	0.0536	0.0473	-0.0063	NA	1
923	SORT1	93.5534	80.0776	-0.1966	1	NC	No	No	1	SORT1_exon_chr1:109314057	1	1	0	NA	5	65.6	67.35	1.76	NA
924	PSMA5	634.734	600.391	-0.0762	0.559702	NC	No	No	1	PSMA5_exon_chr1:109402090	1	1	0	NA	1
925	SYPL2	9.5081	15.2574	0.6748	1	NC	No	No	1	SYPL2_exon_chr1:109479377	1	1	0	NA	1
926	CYB561D1	59.4438	58.1418	0.0563	1	NC	No	No	1	CYB561D1_exon_chr1:109495678	1	1	0	NA	1
927	AL355310.1	425.101	399.846	-0.1033	0.773381	NC	No	No	1	AL355310.1_exon_chr1:109592344	1	1	0	NA	17	49.27	49.23	-0.05	NA
928	AMPD2	109.424	109.487	-0.0116	1	NC	No	No	1	AMPD2_exon_chr1:109630942	1	1	0	NA	1
929	GSTM4	47.9949	37.462	-0.3141	1	NC	No	No	2	GSTM4_exon_chr1:109658999	0.8618	0.8576	-0.0042	NA	1
930	GSTM4									GSTM4_exon_chr1:109665010	0.1382	0.1424	0.0042	NA	1
931	GSTM2	7.7056	9.2334	0.2625	1	NC	No	No	1	GSTM2_exon_chr1:109674746	1	1	0	NA	1
932	GSTM1	7.3272	9.2334	0.3342	1	NC	No	No	1	GSTM1_exon_chr1:109693205	1	1	0	NA	1
933	CSF1	11.9644	17.31	0.5467	1	NC	No	No	1	CSF1_exon_chr1:109928851	1	1	0	NA	1
934	AHCYL1	924.604	878.381	-0.0745	0.4697	NC	No	No	1	AHCYL1_exon_chr1:110021673	1	1	0	NA	1
935	STRIP1	69.6021	85.6978	0.3339	0.78024	NC	No	No	1	STRIP1_exon_chr1:110053664	1	1	0	NA	1
936	AL160006.1	39.238	38.4747	-0.087	1	NC	No	No	1	AL160006.1_exon_chr1:110058339	1	1	0	NA	1
937	SLC6A17	18.4424	22.6019	0.26	1	NC	No	No	1	SLC6A17_exon_chr1:110198075	1	1	0	NA	2	71.21	81.36	10.14	NA
938	KCNC4	21.7153	26.7264	0.3137	1	NC	No	No	2	KCNC4_exon_chr1:110219715	0.1881	0.2032	0.0151	NA	2	88.97	86.21	-2.76	NA
939	KCNC4									KCNC4_exon_chr1:110232220	0.8119	0.7968	-0.0151	NA	4	32.71	19.14	-13.57	NA
940	RBM15	34.0549	45.6525	0.3939	0.781041	NC	No	No	1	RBM15_exon_chr1:110346307	1	1	0	NA	1
941	LAMTOR5-AS1	10.9785	9.5893	-0.2649	1	NC	No	No	2	LAMTOR5-AS1_exon_chr1:110347115	0.2966	0.3341	0.0375	NA	1
942	LAMTOR5-AS1									LAMTOR5-AS1_exon_chr1:110415609	0.7034	0.654	-0.0494	NA	1
943	AL355488.1	6.9249	10.544	0.5203	1	NC	No	No	1	AL355488.1_exon_chr1:110370153	1	1	0	NA	1
944	LAMTOR5	1124.63	1275.58	0.1848	0.0588199	NC	No	No	1	LAMTOR5_exon_chr1:110401583	1	1	0	NA	1
945	LRIF1	50.7459	42.4116	-0.2362	1	NC	No	No	1	LRIF1_exon_chr1:110948399	1	1	0	NA	5	92.46	97.38	4.92	NA
946	DRAM2	131.145	145.368	0.1625	0.941675	NC	No	No	1	DRAM2_exon_chr1:111118267	1	1	0	NA	5	49.93	50.29	0.37	NA
947	CEPT1	91.5304	70.667	-0.3419	0.715705	NC	No	No	2	CEPT1_exon_chr1:111147641	0.1935	0.2984	0.1049	NA	1
948	CEPT1									CEPT1_exon_chr1:111184190	0.8065	0.7016	-0.1049	NA	4	71.08	67.64	-3.43	NA
949	DENND2D	121.269	122.865	-0.0118	1	NC	No	No	1	DENND2D_exon_chr1:111187681	1	1	0	NA	1
950	OVGP1	34.0126	43.747	0.3581	1	NC	No	No	1	OVGP1_exon_chr1:111415344	1	1	0	NA	1
951	AL390195.1	471.318	461.667	-0.0246	0.868413	NC	No	No	1	AL390195.1_exon_chr1:111441389	1	1	0	NA	10	59.22	55.58	-3.64	NA
952	ATP5PB	604.462	535.406	-0.1652	0.277417	NC	No	No	1	ATP5PB_exon_chr1:111460916	1	1	0	NA	6	29.92	29.33	-0.59	NA
953	RAP1A	183.484	193.803	0.1125	0.802399	NC	No	No	1	RAP1A_exon_chr1:111712430	1	1	0	NA	8	67.88	63.34	-4.54	NA
954	INKA2	12.6741	7.7591	-0.6078	1	NC	No	No	1	INKA2_exon_chr1:111727831	1	1	0	NA	5	63.42	80.05	16.63	NA
955	DDX20	143.084	140.224	-0.0368	1	NC	No	No	1	DDX20_exon_chr1:111765736	1	1	0	NA	4	17.54	24.36	6.81	NA
956	CTTNBP2NL	117.786	123.338	0.0164	1	NC	No	No	1	CTTNBP2NL_exon_chr1:112455930	1	1	0	NA	10	30.56	33.6	3.04	NA
957	ST7L	23.1159	23.3813	-0.035	1	NC	No	No	3	ST7L_exon_chr1:112526111	0.5123	0.4984	-0.0139	NA	6	34.3	52.34	18.04	NA
958	ST7L									ST7L_exon_chr1:112542090	0.1428	0.0853	-0.0575	NA	2	69.05	89.68	20.63	NA
959	ST7L									ST7L_exon_chr1:112611003	0.2524	0.3499	0.0975	NA	1
960	WNT2B	5.7906	5.3331	-0.045	1	NC	No	No	2	WNT2B_exon_chr1:112516139	0.1239	0	-0.1239	NA	4	95.92	25.34	-70.59	NA
961	WNT2B									WNT2B_exon_chr1:112520279	0.8761	1	0.1239	NA	1
962	CAPZA1	353.875	399.979	0.1859	0.281205	NC	No	No	1	CAPZA1_exon_chr1:112669991	1	1	0	NA	4	73.99	76.5	2.51	NA
963	MOV10	1312.7	1286.94	-0.0394	0.705994	NC	No	No	1	MOV10_exon_chr1:112698286	1	1	0	NA	1
964	RHOC	718.3	778.858	0.1114	0.36488	NC	No	No	1	RHOC_exon_chr1:112701713	1	1	0	NA	1
965	PPM1J	53.4909	46.0229	-0.2126	1	NC	No	No	1	PPM1J_exon_chr1:112710310	1	1	0	NA	1
966	TAFA3	11.5821	7.7901	-0.4299	1	NC	No	No	1	TAFA3_exon_chr1:112726628	1	1	0	NA	1
967	SLC16A1	539.527	466.726	-0.1936	0.178486	NC	No	No	1	SLC16A1_exon_chr1:112914165	1	1	0	NA	7	75.99	74.1	-1.89	NA
968	SLC16A1-AS1	26.634	25.8926	-0.0274	1	NC	No	No	1	SLC16A1-AS1_exon_chr1:112963971	1	1	0	NA	1
969	LRIG2	38.4214	35.2142	-0.0447	1	NC	No	No	1	LRIG2_exon_chr1:113123874	1	1	0	NA	5	29.39	30.29	0.9	NA
970	MAGI3	32.4115	30.9761	-0.0177	1	NC	No	No	3	MAGI3_exon_chr1:113403654	0.1116	0.1613	0.0497	NA	1
971	MAGI3									MAGI3_exon_chr1:113619735	0.0337	0.1001	0.0664	NA	1
972	MAGI3									MAGI3_exon_chr1:113682896	0.8547	0.7276	-0.1272	NA	8	73.26	73.13	-0.13	NA
973	PHTF1	28.4816	32.2678	0.2069	1	NC	No	No	3	PHTF1_exon_chr1:113697725	0.2144	0.3199	0.1055	NA	1
974	PHTF1									PHTF1_exon_chr1:113704167	0.0634	0.048	-0.0154	NA	1
975	PHTF1									PHTF1_exon_chr1:113706162	0.6973	0.5856	-0.1117	NA	1
976	AL133517.1	12.0482	10.4774	-0.1516	1	NC	No	No	1	AL133517.1_exon_chr1:113700243	1	1	0	NA	1
977	RSBN1	18.1055	17.0799	-0.1774	1	NC	No	No	1	RSBN1_exon_chr1:113766453	1	1	0	NA	3	66.37	56.89	-9.49	NA
978	AP4B1	98.4425	107.763	0.1528	0.961452	NC	No	No	1	AP4B1_exon_chr1:113897975	1	1	0	NA	1
979	DCLRE1B	26.6862	34.0304	0.4234	1	NC	No	No	1	DCLRE1B_exon_chr1:113911130	1	1	0	NA	4	70.58	55.26	-15.32	NA
980	HIPK1	87.984	96.7197	0.0925	1	NC	No	No	1	HIPK1_exon_chr1:113973023	1	1	0	NA	4	95.42	94.41	-1.01	NA
981	TRIM33	89.5366	93.2729	0.0787	1	NC	No	No	3	TRIM33_exon_chr1:114397990	0.8122	0.7758	-0.0364	NA	5	59.08	57.29	-1.79	NA
982	TRIM33									TRIM33_exon_chr1:114399609	0.065	0.113	0.0479	NA	1
983	TRIM33									TRIM33_exon_chr1:114430912	0.1228	0.1113	-0.0115	NA	1
984	BCAS2	258.818	234.983	-0.167	0.523253	NC	No	No	1	BCAS2_exon_chr1:114568256	1	1	0	NA	6	69.29	62.62	-6.67	NA
985	DENND2C	8.0847	10.2885	0.3674	1	NC	No	No	1	DENND2C_exon_chr1:114585631	1	1	0	NA	1
986	NRAS	252.166	289.917	0.2024	0.411712	NC	No	No	1	NRAS_exon_chr1:114708050	1	1	0	NA	7	88.48	87.46	-1.02	NA
987	CSDE1	1797.05	1494.16	-0.2658	0.00113666	NC	No	No	1	CSDE1_exon_chr1:114718216	1	1	0	NA	8	83.18	82.18	-1	NA
988	SIKE1	154.288	187.391	0.2493	0.377105	NC	No	No	2	SIKE1_exon_chr1:114774372	0.7531	0.8624	0.1093	NA	7	90.61	89.59	-1.02	NA
989	SIKE1									SIKE1_exon_chr1:114779284	0.2469	0.1376	-0.1093	NA	1
990	VANGL1	81.7376	89.0478	0.1588	1	NC	No	No	1	VANGL1_exon_chr1:115691118	1	1	0	NA	6	37.73	31.79	-5.94	NA
991	ATP1A1	2020.63	2042.97	0.0207	0.728527	NC	No	No	1	ATP1A1_exon_chr1:116404415	1	1	0	NA	1
992	CD58	35.1693	33.7687	-0.0589	1	NC	No	No	2	CD58_exon_chr1:116514822	0.7843	0.6731	-0.1112	NA	1
993	CD58									CD58_exon_chr1:116521983	0.2049	0.2911	0.0862	NA	1
994	IGSF3	72.8061	106.097	0.5301	0.126033	NC	No	No	1	IGSF3_exon_chr1:116577562	1	1	0	NA	4	90.63	89.62	-1.02	NA
995	PTGFRN	141.098	129.797	-0.1061	1	NC	No	No	1	PTGFRN_exon_chr1:116986800	1	1	0	NA	3	67.71	72.57	4.86	NA
996	TTF2	144.294	145.866	0.0204	1	NC	No	No	2	TTF2_exon_chr1:117074869	0.4522	0.433	-0.0192	NA	2	23.53	23.32	-0.21	NA
997	TTF2									TTF2_exon_chr1:117101379	0.5255	0.5533	0.0279	NA	9	22.18	23.45	1.27	NA
998	TRIM45	15.3481	15.78	-0.0835	1	NC	No	No	1	TRIM45_exon_chr1:117112453	1	1	0	NA	2	79.75	77.44	-2.31	NA
999	MAN1A2	475.947	513.837	0.0951	0.710323	NC	No	No	2	MAN1A2_exon_chr1:117402185	0.8343	0.8626	0.0283	NA	2	43.19	44.81	1.62	NA
1000	MAN1A2									MAN1A2_exon_chr1:117522824	0.1657	0.1374	-0.0283	NA	10	58.22	57.79	-0.42	NA
1001	TENT5C	11.5797	13.9765	0.1763	1	NC	No	No	1	TENT5C_exon_chr1:117622841	1	1	0	NA	3	76.77	81.68	4.9	NA
1002	PNRC2P1	40.0425	53.9375	0.368	0.878317	NC	No	No	1	PNRC2P1_exon_chr1:117778506	1	1	0	NA	1
1003	GDAP2	38.9736	59.2449	0.5962	0.280743	NC	No	No	2	GDAP2_exon_chr1:117870616	0.9434	0.8902	-0.0531	NA	8	66.61	57.87	-8.75	NA
1004	GDAP2									GDAP2_exon_chr1:117878152	0.0377	0.1001	0.0624	NA	1
1005	WDR3	207.077	204.863	0.0198	1	NC	No	No	2	WDR3_exon_chr1:117941749	0.1925	0.1637	-0.0288	NA	1
1006	WDR3									WDR3_exon_chr1:117959291	0.8075	0.8363	0.0288	NA	6	26.61	26.37	-0.24	NA
1007	WARS2	53.2445	51.2157	-0.0395	1	NC	No	No	1	WARS2_exon_chr1:119033388	1	1	0	NA	3	19.4	18.34	-1.06	NA
1008	WARS2-AS1	14.2282	10.4065	-0.3443	1	NC	No	No	1	WARS2-AS1_exon_chr1:119178643	1	1	0	NA	2	79.04	80.63	1.59	NA
1009	ZNF697	12.3141	14.6466	0.168	1	NC	No	No	1	ZNF697_exon_chr1:119624116	1	1	0	NA	5	88.17	88.52	0.36	NA
1010	PHGDH	795.545	723.013	-0.1515	0.247049	NC	No	No	1	PHGDH_exon_chr1:119743866	1	1	0	NA	1
1011	NOTCH2	250.906	240.848	-0.0631	0.957271	NC	No	No	2	NOTCH2_exon_chr1:119916694	0.5797	0.6208	0.0411	NA	6	91.75	89.76	-1.99	NA
1012	NOTCH2									NOTCH2_exon_chr1:119996746	0.4203	0.3792	-0.0411	NA	1
1013	SEC22B	409.584	400.732	-0.0546	0.909663	NC	No	No	1	SEC22B_exon_chr1:120159402	1	1	0	NA	14	79.48	77.68	-1.8	NA
1014	AC244669.1	71.2596	75.0273	0.0019	1	NC	No	No	1	AC244669.1_exon_chr1:120267838	1	1	0	NA	1
1015	NBPF8	181.554	201.008	0.1452	0.718345	NC	No	No	2	NBPF8_exon_chr1:120465262	0.6001	0.6315	0.0315	NA	1
1016	NBPF8									NBPF8_exon_chr1:120465977	0.3999	0.3685	-0.0315	NA	2	25.29	25.02	-0.28	NA
1017	AC241952.1	25.4734	19.6592	-0.3122	1	NC	No	No	1	AC241952.1_exon_chr1:120536402	1	1	0	NA	1
1018	AC253572.1	128.094	106.189	-0.2623	0.551046	NC	No	No	1	AC253572.1_exon_chr1:120793746	1	1	0	NA	1
1019	NBPF26	22.2547	20.0209	-0.1247	1	NC	No	No	1	NBPF26_exon_chr1:120840349	1	1	0	NA	2	57.06	62.98	5.92	NA
1020	AC241377.3	10.6663	12.7237	0.2289	1	NC	No	No	1	AC241377.3_exon_chr1:120914238	1	1	0	NA	1
1021	LINC00623	26.9414	42.2184	0.6449	1	NC	No	No	1	LINC00623_exon_chr1:120952438	1	1	0	NA	1
1022	FAM72B	120.166	133.522	0.1904	0.669533	NC	No	No	1	FAM72B_exon_chr1:121168835	1	1	0	NA	4	67	67.01	0.02	NA
1023	SRGAP2C	34.5273	40.2246	0.2451	1	NC	No	No	1	SRGAP2C_exon_chr1:121387633	1	1	0	NA	5	62.63	66.92	4.29	NA
1024	FAM72C	102.858	123.222	0.2997	0.394535	NC	No	No	1	FAM72C_exon_chr1:143956481	1	1	0	NA	4	66.11	68.05	1.93	NA
1025	LINC02802	46.0596	66.4934	0.565	0.344893	NC	No	No	1	LINC02802_exon_chr1:144227379	1	1	0	NA	1
1026	NBPF15	65.5023	66.4654	0.0358	1	NC	No	No	1	NBPF15_exon_chr1:144423256	1	1	0	NA	2	16.07	17.55	1.48	NA
1027	U1	66.5183	41.2983	-0.778	0.10212	NC	No	No	5	U1_exon_chr1:144560829	0.1265	0.1174	-0.0091	NA	2	75	86.74	11.74	NA
1028	U1									U1_exon_chr1:146376806	0.4445	0.4652	0.0207	NA	2	77.78	72.4	-5.38	NA
1029	U1									U1_exon_chr1:149636765	0.0938	0.0965	0.0027	NA	1
1030	U1									U1_exon_chr1:KI270713v1	0.2308	0.1557	-0.0751	NA	3	61.66	71.04	9.38	NA
1031	U1									U1_exon_chr1:KI270765v1	0.1045	0.1625	0.058	NA	1
1032	SRGAP2B	57.3259	55.1752	-0.0641	1	NC	No	No	1	SRGAP2B_exon_chr1:144892381	1	1	0	NA	7	60.23	58.4	-1.83	NA
1033	FAM72D	127.743	143.362	0.2017	0.620701	NC	No	No	1	FAM72D_exon_chr1:145111502	1	1	0	NA	4	67.55	65.42	-2.13	NA
1034	LINC01145	12.7626	10.0981	-0.282	1	NC	No	No	1	LINC01145_exon_chr1:145169086	1	1	0	NA	1
1035	AC241585.2	11.423	14.716	0.3139	1	NC	No	No	1	AC241585.2_exon_chr1:145214850	1	1	0	NA	1
1036	NBPF20	82.3221	92.7269	0.1481	1	NC	No	No	4	NBPF20_exon_chr1:145291769	0.4676	0.4103	-0.0572	NA	3	34.96	32.15	-2.81	NA
1037	NBPF20									NBPF20_exon_chr1:145292489	0.1578	0.1476	-0.0101	NA	1
1038	NBPF20									NBPF20_exon_chr1:145302009	0.2082	0.2241	0.0159	NA	1
1039	NBPF20									NBPF20_exon_chr1:145305178	0.1665	0.2179	0.0515	NA	1
1040	NBPF25P	9.8035	9.7276	0.1562	1	NC	No	No	1	NBPF25P_exon_chr1:145572933	1	1	0	NA	1
1041	GPR89A	134.676	113.795	-0.207	0.657361	NC	No	No	1	GPR89A_exon_chr1:145669833	1	1	0	NA	1
1042	RNF115	142.393	133.131	-0.0422	1	NC	No	No	1	RNF115_exon_chr1:145746997	1	1	0	NA	10	37.74	39.37	1.63	NA
1043	POLR3C	234.428	205.017	-0.1873	0.608513	NC	No	No	1	POLR3C_exon_chr1:145842338	1	1	0	NA	7	26.85	26.72	-0.12	NA
1044	PIAS3	43.9119	44.709	-0.0735	1	NC	No	No	1	PIAS3_exon_chr1:145850269	1	1	0	NA	1
1045	NUDT17	19.4416	27.6989	0.5455	1	NC	No	No	1	NUDT17_exon_chr1:145848111	1	1	0	NA	1
1046	PEX11B	34.8587	36.2549	0.0948	1	NC	No	No	1	PEX11B_exon_chr1:145912566	1	1	0	NA	1
1047	RBM8A	851.529	834.13	-0.0175	0.813185	NC	No	No	1	RBM8A_exon_chr1:145926177	1	1	0	NA	5	18.82	19.86	1.03	NA
1048	LIX1L	37.5168	35.4185	-0.1591	1	NC	No	No	1	LIX1L_exon_chr1:145936552	1	1	0	NA	4	81.55	70.59	-10.96	NA
1049	AC243547.3	349.319	314.212	-0.1662	0.377105	NC	No	No	1	AC243547.3_exon_chr1:145977482	1	1	0	NA	4	46.68	46.65	-0.03	NA
1050	NBPF10	43.3968	39.8259	-0.0967	1	NC	No	No	1	NBPF10_exon_chr1:146066561	1	1	0	NA	2	32.24	24.32	-7.92	NA
1051	NOTCH2NLA	272.663	294.366	0.0844	0.835136	NC	No	No	1	NOTCH2NLA_exon_chr1:146156229	1	1	0	NA	1
1052	SEC22B4P	46.7685	49.8394	0.0145	1	NC	No	No	1	SEC22B4P_exon_chr1:146321996	1	1	0	NA	2	29.35	25.63	-3.71	NA
1053	NBPF12	76.2807	79.1046	0.0656	1	NC	No	No	3	NBPF12_exon_chr1:146987953	0.0478	0.0808	0.033	NA	1
1054	NBPF12									NBPF12_exon_chr1:146993598	0.1379	0.1202	-0.0177	NA	1
1055	NBPF12									NBPF12_exon_chr1:146994331	0.8143	0.7989	-0.0153	NA	2	12.15	10.66	-1.49	NA
1056	PRKAB2	24.0086	27.0848	0.2126	1	NC	No	No	1	PRKAB2_exon_chr1:147159642	1	1	0	NA	7	96.84	91.99	-4.85	NA
1057	AC242426.2	198.593	216.59	0.1349	0.719138	NC	No	No	1	AC242426.2_exon_chr1:147295430	1	1	0	NA	1
1058	PDIA3P1	10.5124	8.6094	-0.3639	1	NC	No	No	1	PDIA3P1_exon_chr1:147177892	1	1	0	NA	3	41.31	33.62	-7.69	NA
1059	CCT8P1	38.0407	30.7829	-0.2841	1	NC	No	No	1	CCT8P1_exon_chr1:147204932	1	1	0	NA	1
1060	CHD1L	24.1669	25.9058	0.0881	1	NC	No	No	1	CHD1L_exon_chr1:147285323	1	1	0	NA	2	88.26	89.65	1.39	NA
1061	BCL9	59.014	63.0215	0.1165	1	NC	No	No	1	BCL9_exon_chr1:147623841	1	1	0	NA	2	89.16	87.92	-1.24	NA
1062	ACP6	81.4808	69.6799	-0.2331	1	NC	No	No	1	ACP6_exon_chr1:147648411	1	1	0	NA	1
1063	GPR89B	116.905	105.505	-0.1148	1	NC	No	No	1	GPR89B_exon_chr1:147992710	1	1	0	NA	1
1064	LINC02804	18.2594	19.4335	0.1056	1	NC	No	No	1	LINC02804_exon_chr1:148025776	1	1	0	NA	1
1065	RNVU1-7	12.0019	8.9177	-0.4284	1	NC	No	No	1	RNVU1-7_exon_chr1:148038916	1	1	0	NA	2	66.16	56.97	-9.19	NA
1066	NBPF11	25.479	25.9145	0.0835	1	NC	No	No	1	NBPF11_exon_chr1:148103912	1	1	0	NA	2	39.03	35.57	-3.46	NA
1067	AC245100.7	11.4007	13.6225	0.1982	1	NC	No	No	1	AC245100.7_exon_chr1:148458813	1	1	0	NA	1
1068	PPIAL4G	11.2284	11.2771	0.1359	1	NC	No	No	1	PPIAL4G_exon_chr1:148483679	1	1	0	NA	1
1069	NBPF14	43.3091	40.161	-0.0812	1	NC	No	No	1	NBPF14_exon_chr1:148533248	1	1	0	NA	2	33.59	23.4	-10.19	NA
1070	NOTCH2NLB	274.467	301.616	0.1098	0.71567	NC	No	No	1	NOTCH2NLB_exon_chr1:148607159	1	1	0	NA	1
1071	NUDT4B	17.9512	15.7178	-0.1742	1	NC	No	No	1	NUDT4B_exon_chr1:148748893	1	1	0	NA	1
1072	PDE4DIP	26.2493	21.3579	-0.3544	1	NC	No	No	1	PDE4DIP_exon_chr1:148981269	1	1	0	NA	4	57.18	54.8	-2.39	NA
1073	NBPF9	68.04	63.1877	-0.0639	1	NC	No	No	1	NBPF9_exon_chr1:149055899	1	1	0	NA	2	17.64	14.49	-3.16	NA
1074	AC245297.3	54.0252	50.8341	-0.1571	1	NC	No	No	1	AC245297.3_exon_chr1:149250564	1	1	0	NA	1
1075	NOTCH2NLC	290.478	314.617	0.0893	0.778911	NC	No	No	1	NOTCH2NLC_exon_chr1:149464076	1	1	0	NA	1
1076	AC242842.3	63.981	60.1155	-0.0891	1	NC	No	No	1	AC242842.3_exon_chr1:149554494	1	1	0	NA	3	11.1	9.1	-2	NA
1077	LINC00869	40.2399	46.5861	0.2544	1	NC	No	No	2	LINC00869_exon_chr1:149646598	0.7011	0.7995	0.0984	NA	1
1078	LINC00869									LINC00869_exon_chr1:149705177	0.2989	0.2005	-0.0984	NA	1
1079	HIST2H4A	9.0651	14.0192	0.5853	1	NC	No	No	2	HIST2H4A_exon_chr1:149832658	0.1181	0.076	-0.0421	NA	3	27.63	35.29	7.66	NA
1080	HIST2H4A									HIST2H4A_exon_chr1:149834134	0.8819	0.924	0.0421	NA	1
1081	HIST2H2AA3	31.9139	37.7668	0.1325	1	NC	No	No	1	HIST2H2AA3_exon_chr1:149842736	1	1	0	NA	1
1082	HIST2H2BC	10.4861	7.6678	-0.557	1	NC	No	No	1	HIST2H2BC_exon_chr1:149850937	1	1	0	NA	3	62.75	88.11	25.36	NA
1083	HIST2H2AA4	31.581	35.584	0.0722	1	NC	No	No	1	HIST2H2AA4_exon_chr1:149851060	1	1	0	NA	2	98.05	91.38	-6.67	NA
1084	HIST2H4B	9.8003	15.9849	0.6655	1	NC	No	No	2	HIST2H4B_exon_chr1:149859681	0.8156	0.8193	0.0038	NA	3	25.67	33.06	7.38	NA
1085	HIST2H4B									HIST2H4B_exon_chr1:149861210	0.1844	0.1807	-0.0038	NA	2	55.81	25.24	-30.57	NA
1086	HIST2H2AC	83.8013	76.5409	-0.1967	1	NC	No	No	1	HIST2H2AC_exon_chr1:149886974	1	1	0	NA	1
1087	BOLA1	188.292	176.306	-0.0855	0.844932	NC	No	No	1	BOLA1_exon_chr1:149899842	1	1	0	NA	1
1088	SV2A	5.0555	5.5118	0.0749	1	NC	No	No	1	SV2A_exon_chr1:149905197	1	1	0	NA	1
1089	SF3B4	551.392	614.534	0.1632	0.28605	NC	No	No	1	SF3B4_exon_chr1:149923729	1	1	0	NA	1
1090	MTMR11	33.4066	24.0775	-0.43	1	NC	No	No	1	MTMR11_exon_chr1:149931592	1	1	0	NA	1
1091	OTUD7B	98.7886	108.491	0.1677	0.918798	NC	No	No	1	OTUD7B_exon_chr1:149945065	1	1	0	NA	14	66.92	57.13	-9.79	NA
1092	VPS45	111.33	112.038	0.0252	1	NC	No	No	1	VPS45_exon_chr1:150144708	1	1	0	NA	1
1093	PLEKHO1	115.424	145.781	0.3144	0.348181	NC	No	No	1	PLEKHO1_exon_chr1:150158818	1	1	0	NA	1
1094	ANP32E	694.327	728.875	0.0596	0.656061	NC	No	No	3	ANP32E_exon_chr1:150220761	0.3951	0.366	-0.0291	NA	7	75.38	74.96	-0.43	NA
1095	ANP32E									ANP32E_exon_chr1:150223294	0.0548	0.0701	0.0153	NA	1
1096	ANP32E									ANP32E_exon_chr1:150226795	0.5377	0.5528	0.0151	NA	2	36.17	35.56	-0.61	NA
1097	APH1A	699.867	704.691	0.0124	0.833739	NC	No	No	1	APH1A_exon_chr1:150266656	1	1	0	NA	1
1098	C1orf54	26.5064	28.9416	0.096	1	NC	No	No	1	C1orf54_exon_chr1:150280834	1	1	0	NA	1
1099	MRPS21	592.345	492.858	-0.255	0.0569686	NC	No	No	1	MRPS21_exon_chr1:150308047	1	1	0	NA	1
1100	PRPF3	62.7905	62.486	0.0044	1	NC	No	No	1	PRPF3_exon_chr1:150352832	1	1	0	NA	1
1101	RPRD2	158.512	171.989	0.1605	0.699121	NC	No	No	1	RPRD2_exon_chr1:150470560	1	1	0	NA	6	28.77	28.27	-0.5	NA
1102	TARS2	159.322	133.413	-0.2312	0.593024	NC	No	No	1	TARS2_exon_chr1:150506915	1	1	0	NA	2	87.33	85.61	-1.72	NA
1103	ADAMTSL4-AS1	300.048	392.219	0.3665	0.0167127	NC	No	No	1	ADAMTSL4-AS1_exon_chr1:150577491	1	1	0	NA	5	82.96	76.2	-6.76	NA
1104	ENSA	1699.52	1665.08	-0.0384	0.75193	NC	No	No	1	ENSA_exon_chr1:150622859	1	1	0	NA	1
1105	GOLPH3L	50.7578	48.4735	-0.0024	1	NC	No	No	1	GOLPH3L_exon_chr1:150648748	1	1	0	NA	5	91.66	94.9	3.24	NA
1106	ARNT	61.8687	66.0196	0.1314	1	NC	No	No	1	ARNT_exon_chr1:150812110	1	1	0	NA	5	74.22	76.04	1.82	NA
1107	CYCSP51	13.3846	14.4455	0.1669	1	NC	No	No	1	CYCSP51_exon_chr1:150903895	1	1	0	NA	1
1108	SETDB1	29.4624	28.4798	-0.0653	1	NC	No	No	4	SETDB1_exon_chr1:150929966	0.0499	0.068	0.0181	NA	2	100	33.55	-66.45	NA
1109	SETDB1									SETDB1_exon_chr1:150944917	0.0981	0.0213	-0.0768	NA	1
1110	SETDB1									SETDB1_exon_chr1:150962586	0.0734	0.137	0.0636	NA	2	33.52	18.01	-15.51	NA
1111	SETDB1									SETDB1_exon_chr1:150964246	0.7786	0.7737	-0.0049	NA	1
1112	CERS2	859.48	911.314	0.0873	0.463201	NC	No	No	1	CERS2_exon_chr1:150966629	1	1	0	NA	3	55.59	53.71	-1.88	NA
1113	PRUNE1	92.1826	88.5146	-0.0613	1	NC	No	No	1	PRUNE1_exon_chr1:151033805	1	1	0	NA	1
1114	CDC42SE1	160.288	186.07	0.2288	0.432952	NC	No	No	1	CDC42SE1_exon_chr1:151053327	1	1	0	NA	1
1115	GABPB2	46.8902	63.8538	0.4699	0.573653	NC	No	No	1	GABPB2_exon_chr1:151117956	1	1	0	NA	6	48.62	60.73	12.11	NA
1116	AL592424.1	66.6833	72.1768	0.1034	1	NC	No	No	1	AL592424.1_exon_chr1:151133517	1	1	0	NA	1
1117	LYSMD1	12.4903	11.7097	-0.0319	1	NC	No	No	1	LYSMD1_exon_chr1:151161020	1	1	0	NA	1
1118	SCNM1	203.076	220.057	0.1072	0.79569	NC	No	No	1	SCNM1_exon_chr1:151168985	1	1	0	NA	1
1119	TMOD4	43.6252	46.8833	0.1005	1	NC	No	No	2	TMOD4_exon_chr1:151170103	0.1755	0.0948	-0.0807	NA	1
1120	TMOD4									TMOD4_exon_chr1:151177064	0.8245	0.9052	0.0807	NA	4	51.4	60.22	8.83	NA
1121	PIP5K1A	296.534	293.115	-0.0203	0.922889	NC	No	No	1	PIP5K1A_exon_chr1:151247862	1	1	0	NA	1
1122	PSMD4	2209.76	2163.7	-0.0325	0.725175	NC	No	No	1	PSMD4_exon_chr1:151267172	1	1	0	NA	1
1123	PI4KB	82.4313	96.3898	0.2414	0.964538	NC	No	No	1	PI4KB_exon_chr1:151293033	1	1	0	NA	2	11.58	12.27	0.69	NA
1124	ZNF687	187.034	185.844	0.0137	1	NC	No	No	1	ZNF687_exon_chr1:151290694	1	1	0	NA	1
1125	RFX5	97.2179	82.3681	-0.2296	1	NC	No	No	1	RFX5_exon_chr1:151343178	1	1	0	NA	4	92.84	94.87	2.03	NA
1126	PSMB4	565.168	603.393	0.0972	0.604576	NC	No	No	1	PSMB4_exon_chr1:151399980	1	1	0	NA	1
1127	POGZ	251.564	271.254	0.1218	0.684506	NC	No	No	1	POGZ_exon_chr1:151406464	1	1	0	NA	4	81.5	79.82	-1.68	NA
1128	CGN	11.9365	10.3579	-0.179	1	NC	No	No	1	CGN_exon_chr1:151537204	1	1	0	NA	2	88.28	79.5	-8.78	NA
1129	TUFT1	38.3206	33.9296	-0.2205	1	NC	No	No	1	TUFT1_exon_chr1:151581643	1	1	0	NA	1
1130	SNX27	72.4668	80.4077	0.1915	1	NC	No	No	1	SNX27_exon_chr1:151692910	1	1	0	NA	1
1131	MRPL9	394.511	396.767	0.0247	1	NC	No	No	1	MRPL9_exon_chr1:151760181	1	1	0	NA	1
1132	OAZ3	11.1583	7.3074	-0.3868	1	NC	No	No	1	OAZ3_exon_chr1:151771076	1	1	0	NA	1
1133	TDRKH	29.2439	36.339	0.3181	1	NC	No	No	1	TDRKH_exon_chr1:151774504	1	1	0	NA	1
1134	THEM4	247.741	251.695	0.017	1	NC	No	No	1	THEM4_exon_chr1:151874928	1	1	0	NA	6	9.74	9.4	-0.35	NA
1135	S100A10	1358.3	1659.44	0.2967	0.000961364	NC	No	No	1	S100A10_exon_chr1:151983324	1	1	0	NA	1
1136	S100A11	1843.73	2602.42	0.4967	1.12725e-10	UP	No	No	1	S100A11_exon_chr1:152032823	1	1	0	NA	1
1137	S100A6	10534.5	10980.4	0.0601	0.506832	NC	No	No	1	S100A6_exon_chr1:153534830	1	1	0	NA	1
1138	S100A4	378.467	371.023	-0.0317	1	NC	No	No	1	S100A4_exon_chr1:153543939	1	1	0	NA	1
1139	S100A3	53.3773	45.4333	-0.1664	1	NC	No	No	1	S100A3_exon_chr1:153547846	1	1	0	NA	1
1140	S100A2	46.859	40.6437	-0.2048	1	NC	No	No	1	S100A2_exon_chr1:153561591	1	1	0	NA	2	22.69	18.89	-3.8	NA
1141	S100A16	268.97	295.464	0.1343	0.585209	NC	No	No	1	S100A16_exon_chr1:153607718	1	1	0	NA	1
1142	S100A14	1318.68	1258.33	-0.0692	0.787413	NC	No	No	1	S100A14_exon_chr1:153615022	1	1	0	NA	1
1143	S100A13	1170.17	1151.69	-0.0331	0.76353	NC	No	No	1	S100A13_exon_chr1:153619038	1	1	0	NA	2	91.46	93.68	2.22	NA
1144	CHTOP	175.165	192.014	0.158	0.649548	NC	No	No	1	CHTOP_exon_chr1:153645063	1	1	0	NA	9	43.6	35.38	-8.22	NA
1145	SNAPIN	406.794	386.338	-0.0881	0.773311	NC	No	No	1	SNAPIN_exon_chr1:153661199	1	1	0	NA	1
1146	ILF2	410.848	316.429	-0.3591	0.0134345	NC	No	No	1	ILF2_exon_chr1:153662556	1	1	0	NA	9	15.96	16.41	0.44	NA
1147	INTS3	92.0447	72.5717	-0.2731	1	NC	No	No	2	INTS3_exon_chr1:153773192	0.5098	0.5228	0.013	NA	1
1148	INTS3									INTS3_exon_chr1:GL383518v1	0.4902	0.4709	-0.0193	NA	2	4.59	9.12	4.53	NA
1149	SLC27A3	47.4519	57.7147	0.2856	1	NC	No	No	2	SLC27A3_exon_chr1:153777061	0.5232	0.5213	-0.0018	NA	1
1150	SLC27A3									SLC27A3_exon_chr1:GL383518v1	0.4768	0.4787	0.0018	NA	1
1151	GATAD2B	357.223	392.236	0.1348	0.487854	NC	No	No	2	GATAD2B_exon_chr1:153810310	0.5332	0.5297	-0.0035	NA	4	42.33	43.67	1.34	NA
1152	GATAD2B									GATAD2B_exon_chr1:GL383518v1	0.4668	0.4703	0.0035	NA	4	44.46	46.06	1.6	NA
1153	DENND4B	116.584	137.125	0.2338	0.62324	NC	No	No	2	DENND4B_exon_chr1:153930442	0.8506	0.9125	0.0619	NA	1
1154	DENND4B									DENND4B_exon_chr1:153933319	0.1494	0.0875	-0.0619	NA	1
1155	CRTC2	170.7	205.129	0.2574	0.334622	NC	No	No	1	CRTC2_exon_chr1:153948329	1	1	0	NA	1
1156	AL358472.7	931.26	917.524	-0.0182	0.80281	NC	No	No	2	AL358472.7_exon_chr1:153960754	0.5511	0.5814	0.0303	NA	1
1157	AL358472.7									AL358472.7_exon_chr1:153974835	0.4489	0.4186	-0.0303	NA	3	25.04	27.13	2.08	NA
1158	CREB3L4	101.71	85.523	-0.2479	0.885375	NC	No	No	1	CREB3L4_exon_chr1:153973871	1	1	0	NA	1
1159	AL358472.6	3645.48	3427.4	-0.0952	0.338974	NC	No	No	1	AL358472.6_exon_chr1:153983581	1	1	0	NA	2	34.17	35.09	0.92	NA
1160	RPS27	27111.9	26540.7	-0.0306	0.629926	NC	No	No	1	RPS27_exon_chr1:153992064	1	1	0	NA	1
1161	NUP210L	3390.31	2677.54	-0.3438	9.01646e-09	NC	No	No	1	NUP210L_exon_chr1:154159048	1	1	0	NA	1
1162	TPM3	484.987	383.75	-0.3603	0.0160179	NC	No	No	2	TPM3_exon_chr1:154172978	0.1393	0.1712	0.0319	NA	2	87.11	86.32	-0.79	NA
1163	TPM3									TPM3_exon_chr1:154173201	0.8607	0.8288	-0.0319	NA	1
1164	C1orf43	725.224	712.509	-0.0222	0.839245	NC	No	No	2	C1orf43_exon_chr1:154207648	0.9048	0.9123	0.0075	NA	1
1165	C1orf43									C1orf43_exon_chr1:154212378	0.0952	0.0877	-0.0075	NA	4	64.39	66.86	2.47	NA
1166	UBAP2L	404.784	392.975	-0.0175	1	NC	No	No	2	UBAP2L_exon_chr1:154263102	0.684	0.6789	-0.0051	NA	1
1167	UBAP2L									UBAP2L_exon_chr1:154270199	0.316	0.3211	0.0051	NA	7	49.77	51.12	1.35	NA
1168	HAX1	426.192	495.239	0.2258	0.150973	NC	No	No	1	HAX1_exon_chr1:154274949	1	1	0	NA	1
1169	ATP8B2	60.2819	53.4975	-0.2106	1	NC	No	No	1	ATP8B2_exon_chr1:154348839	1	1	0	NA	3	94.35	92.7	-1.66	NA
1170	IL6R	44.3804	36.554	-0.2039	1	NC	No	No	1	IL6R_exon_chr1:154465133	1	1	0	NA	1
1171	UBE2Q1	373.995	367.534	-0.0019	1	NC	No	No	2	UBE2Q1_exon_chr1:154550469	0.8873	0.886	-0.0013	NA	2	9.28	17.24	7.95	NA
1172	UBE2Q1									UBE2Q1_exon_chr1:154553172	0.1127	0.114	0.0013	NA	1
1173	ADAR	388.698	401.298	0.0367	0.830487	NC	No	No	1	ADAR_exon_chr1:154585043	1	1	0	NA	1
1174	PMVK	158.556	150.934	-0.0953	1	NC	No	No	1	PMVK_exon_chr1:154925265	1	1	0	NA	1
1175	PBXIP1	128.92	125.814	-0.0944	1	NC	No	No	1	PBXIP1_exon_chr1:154945117	1	1	0	NA	1
1176	PYGO2	452.688	464.052	0.0248	1	NC	No	No	2	PYGO2_exon_chr1:154959846	0.4112	0.3868	-0.0244	NA	1
1177	PYGO2									PYGO2_exon_chr1:154964368	0.5888	0.6132	0.0244	NA	1
1178	AL451085.2	5.8552	5.2419	-0.3733	1	NC	No	No	1	AL451085.2_exon_chr1:154961824	1	1	0	NA	3	42.86	73.7	30.84	NA
1179	CKS1B	932.18	881.907	-0.0734	0.525253	NC	No	No	1	CKS1B_exon_chr1:154977298	1	1	0	NA	1
1180	FLAD1	235.138	216.733	-0.1201	0.781463	NC	No	No	2	FLAD1_exon_chr1:154987465	0.1914	0.2509	0.0595	NA	1
1181	FLAD1									FLAD1_exon_chr1:154992564	0.8086	0.7491	-0.0595	NA	1
1182	ZBTB7B	134.375	165.507	0.3057	0.2624	NC	No	No	1	ZBTB7B_exon_chr1:155016219	1	1	0	NA	3	85.73	81.88	-3.85	NA
1183	DCST1-AS1	8.0385	9.3577	0.0406	1	NC	No	No	1	DCST1-AS1_exon_chr1:155045853	1	1	0	NA	1
1184	ADAM15	1201.16	1049.26	-0.201	0.0376147	NC	No	No	1	ADAM15_exon_chr1:155062459	1	1	0	NA	1
1185	EFNA4	45.6526	33.8882	-0.4185	0.753344	NC	No	No	1	EFNA4_exon_chr1:155068852	1	1	0	NA	1
1186	AL691442.1	74.0137	81.8885	0.1133	1	NC	No	No	1	AL691442.1_exon_chr1:155086412	1	1	0	NA	1
1187	EFNA1	30.1114	31.9639	0.036	1	NC	No	No	1	EFNA1_exon_chr1:155133954	1	1	0	NA	1
1188	SLC50A1	252.085	253.536	-0.0176	1	NC	No	No	1	SLC50A1_exon_chr1:155138161	1	1	0	NA	1
1189	DPM3	53.0112	44.1093	-0.3431	0.867036	NC	No	No	1	DPM3_exon_chr1:155140407	1	1	0	NA	1
1190	KRTCAP2	2567.24	2606.88	0.0221	0.76605	NC	No	No	1	KRTCAP2_exon_chr1:155169619	1	1	0	NA	1
1191	TRIM46	14.0759	10.287	-0.369	1	NC	No	No	2	TRIM46_exon_chr1:155180434	0.3307	0.1513	-0.1794	NA	1
1192	TRIM46									TRIM46_exon_chr1:155183796	0.6693	0.8487	0.1794	NA	1
1193	MUC1	9.0412	13.0762	0.5292	1	NC	No	No	1	MUC1_exon_chr1:155186209	1	1	0	NA	1
1194	THBS3	28.4097	35.5572	0.3148	1	NC	No	No	1	THBS3_exon_chr1:155195899	1	1	0	NA	1
1195	MTX1	533.389	541.091	0.0158	1	NC	No	No	1	MTX1_exon_chr1:155213483	1	1	0	NA	1
1196	AC234582.2	280.024	302.412	0.0934	0.699121	NC	No	No	1	AC234582.2_exon_chr1:155214473	1	1	0	NA	1
1197	MTX1P1	1065.71	1080.12	0.0165	0.768208	NC	No	No	2	MTX1P1_exon_chr1:155234110	0.4988	0.4976	-0.0012	NA	1
1198	MTX1P1									MTX1P1_exon_chr1:GL383519v1	0.5012	0.5024	0.0012	NA	1
1199	GBA	565.93	604.87	0.0834	0.823059	NC	No	No	2	GBA_exon_chr1:155235100	0.5031	0.506	0.0029	NA	1
1200	GBA									GBA_exon_chr1:GL383519v1	0.4969	0.494	-0.0029	NA	1
1201	FAM189B	180.251	187.516	0.0709	0.96634	NC	No	No	2	FAM189B_exon_chr1:155248303	0.494	0.4912	-0.0028	NA	1
1202	FAM189B									FAM189B_exon_chr1:GL383519v1	0.506	0.5088	0.0028	NA	1
1203	SCAMP3	721.644	689.204	-0.0663	0.712769	NC	No	No	2	SCAMP3_exon_chr1:155256419	0.4922	0.4918	-0.0004	NA	1
1204	SCAMP3									SCAMP3_exon_chr1:GL383519v1	0.5078	0.5082	0.0004	NA	1
1205	CLK2	430.624	402.203	-0.1165	0.60069	NC	No	No	2	CLK2_exon_chr1:155263400	0.4933	0.4917	-0.0015	NA	1
1206	CLK2									CLK2_exon_chr1:GL383519v1	0.5067	0.5083	0.0015	NA	1
1207	HCN3	76.6475	68.0702	-0.1815	1	NC	No	No	2	HCN3_exon_chr1:155287780	0.5	0.4955	-0.0045	NA	3	93.72	82.31	-11.42	NA
1208	HCN3									HCN3_exon_chr1:GL383519v1	0.5	0.5045	0.0045	NA	3	93.72	82.38	-11.35	NA
1209	FDPS	1769.37	1475.76	-0.2568	0.00107957	NC	No	No	1	FDPS_exon_chr1:155320408	1	1	0	NA	1
1210	RUSC1	79.3092	72.4496	-0.1044	1	NC	No	No	1	RUSC1_exon_chr1:155330402	1	1	0	NA	3	89.94	86.09	-3.85	NA
1211	ASH1L	87.6492	105.488	0.2665	0.945852	NC	No	No	3	ASH1L_exon_chr1:155337751	0.7111	0.7956	0.0845	NA	6	75.82	79.06	3.24	NA
1212	ASH1L									ASH1L_exon_chr1:155357749	0.0871	0.0762	-0.0109	NA	1
1213	ASH1L									ASH1L_exon_chr1:155482449	0.2018	0.1282	-0.0736	NA	1
1214	ASH1L-AS1	5.37	11.2359	1.0821	1	NC	No	No	1	ASH1L-AS1_exon_chr1:155562980	1	1	0	NA	1
1215	MSTO1	550.457	576.726	0.0623	0.783677	NC	No	No	1	MSTO1_exon_chr1:155613656	1	1	0	NA	4	64.34	63.83	-0.5	NA
1216	AL353807.3	66.6813	76.1079	0.2195	1	NC	No	No	1	AL353807.3_exon_chr1:155661423	1	1	0	NA	1
1217	DAP3	260.127	271.722	0.088	0.847021	NC	No	No	1	DAP3_exon_chr1:155738156	1	1	0	NA	4	25.71	31.13	5.42	NA
1218	GON4L	304.443	308.584	0.0157	1	NC	No	No	3	GON4L_exon_chr1:155750733	0.3031	0.2922	-0.0109	NA	1
1219	GON4L									GON4L_exon_chr1:155766709	0.2819	0.314	0.0321	NA	1
1220	GON4L									GON4L_exon_chr1:155822476	0.408	0.3857	-0.0223	NA	1
1221	MSTO2P	210.258	227.652	0.0873	0.868638	NC	No	No	1	MSTO2P_exon_chr1:155749922	1	1	0	NA	2	15.66	17.44	1.78	NA
1222	RIT1	31.7564	33.2608	0.0938	1	NC	No	No	1	RIT1_exon_chr1:155900618	1	1	0	NA	1
1223	KHDC4	64.2173	70.8064	0.1863	1	NC	No	No	2	KHDC4_exon_chr1:155915964	0.8577	0.8142	-0.0435	NA	1
1224	KHDC4									KHDC4_exon_chr1:155921628	0.1138	0.1645	0.0507	NA	1
1225	ARHGEF2	51.8499	52.2394	0.0157	1	NC	No	No	1	ARHGEF2_exon_chr1:155948015	1	1	0	NA	1
1226	SSR2	867.131	734.515	-0.2287	0.0445723	NC	No	No	1	SSR2_exon_chr1:156009650	1	1	0	NA	1
1227	UBQLN4	115.06	115.543	0.0077	1	NC	No	No	1	UBQLN4_exon_chr1:156037130	1	1	0	NA	1
1228	LAMTOR2	1067.01	1114.75	0.0531	0.670841	NC	No	No	1	LAMTOR2_exon_chr1:156058277	1	1	0	NA	1
1229	RAB25	249.095	215.886	-0.1948	0.438633	NC	No	No	1	RAB25_exon_chr1:156069670	1	1	0	NA	1
1230	MEX3A	71.4497	59.9193	-0.2496	1	NC	No	No	1	MEX3A_exon_chr1:156077682	1	1	0	NA	4	88.87	83.99	-4.87	NA
1231	LMNA	1357.78	1530.45	0.1629	0.211644	NC	No	No	2	LMNA_exon_chr1:156136213	0.4208	0.3861	-0.0346	NA	1
1232	LMNA									LMNA_exon_chr1:156139079	0.5763	0.6132	0.0369	NA	3	67.76	66.11	-1.65	NA
1233	PMF1-BGLAP	61.6725	78.9786	0.3062	1	NC	No	No	1	PMF1-BGLAP_exon_chr1:156210239	1	1	0	NA	1
1234	PMF1	34.5066	51.8432	0.5441	1	NC	No	No	1	PMF1_exon_chr1:156239547	1	1	0	NA	1
1235	BGLAP	11.5374	8.5885	-0.4241	1	NC	No	No	1	BGLAP_exon_chr1:156242761	1	1	0	NA	1
1236	PAQR6	136.674	144.967	0.0693	1	NC	No	No	1	PAQR6_exon_chr1:156244403	1	1	0	NA	1
1237	SMG5	347.402	427.694	0.3084	0.0274141	NC	No	No	1	SMG5_exon_chr1:156250670	1	1	0	NA	1
1238	GLMP	115.886	103.895	-0.1348	0.855696	NC	No	No	2	GLMP_exon_chr1:156291106	0.0557	0.0661	0.0105	NA	1
1239	GLMP									GLMP_exon_chr1:156294236	0.9443	0.9339	-0.0105	NA	1
1240	CCT3	956.321	922.235	-0.061	0.62122	NC	No	No	2	CCT3_exon_chr1:156309303	0.7739	0.8154	0.0415	NA	1
1241	CCT3									CCT3_exon_chr1:156321025	0.2201	0.1774	-0.0426	NA	1
1242	RHBG	27.2361	25.3153	-0.0733	1	NC	No	No	1	RHBG_exon_chr1:156384413	1	1	0	NA	1
1243	C1orf61	34.8739	42.1951	0.2568	1	NC	No	No	1	C1orf61_exon_chr1:156409030	1	1	0	NA	2	87.98	90.87	2.89	NA
1244	MEF2D	50.4217	70.736	0.5107	0.397557	NC	No	No	1	MEF2D_exon_chr1:156467656	1	1	0	NA	4	55.15	42.1	-13.06	NA
1245	IQGAP3	53.3323	60.0858	0.2039	1	NC	No	No	1	IQGAP3_exon_chr1:156526599	1	1	0	NA	1
1246	NAXE	697.718	587.523	-0.2393	0.0380816	NC	No	No	1	NAXE_exon_chr1:156592556	1	1	0	NA	5	79.77	79.21	-0.56	NA
1247	GPATCH4	1321.54	1385.25	0.0574	0.672908	NC	No	No	1	GPATCH4_exon_chr1:156598319	1	1	0	NA	12	30.87	30.34	-0.53	NA
1248	AL365181.2	19.5791	18.1986	-0.1787	1	NC	No	No	1	AL365181.2_exon_chr1:156641004	1	1	0	NA	1
1249	AL365181.3	326.775	348.268	0.1115	0.600031	NC	No	No	1	AL365181.3_exon_chr1:156644887	1	1	0	NA	1
1250	NES	102.109	101.84	0.002	1	NC	No	No	1	NES_exon_chr1:156673205	1	1	0	NA	6	23.44	23.35	-0.09	NA
1251	CRABP2	1145.89	1099.88	-0.0598	0.63941	NC	No	No	1	CRABP2_exon_chr1:156700076	1	1	0	NA	1
1252	ISG20L2	111.672	107.409	-0.0821	1	NC	No	No	1	ISG20L2_exon_chr1:156723462	1	1	0	NA	6	79.85	79.66	-0.19	NA
1253	RRNAD1	15.3465	10.926	-0.4298	1	NC	No	No	1	RRNAD1_exon_chr1:156736631	1	1	0	NA	1
1254	MRPL24	217.469	207.348	-0.0666	0.95397	NC	No	No	1	MRPL24_exon_chr1:156737534	1	1	0	NA	1
1255	HDGF	1196.04	1075.17	-0.1493	0.1508	NC	No	No	1	HDGF_exon_chr1:156743878	1	1	0	NA	2	87.87	84	-3.86	NA
1256	PRCC	128.12	118.842	-0.1499	0.784625	NC	No	No	2	PRCC_exon_chr1:156794664	0.0531	0.0688	0.0158	NA	2	94.98	86.45	-8.53	NA
1257	PRCC									PRCC_exon_chr1:156800373	0.9384	0.9163	-0.0221	NA	1
1258	SH2D2A	11.669	20.5654	0.8196	1	NC	No	No	1	SH2D2A_exon_chr1:156806573	1	1	0	NA	1
1259	NTRK1	9.4467	13.386	0.4917	1	NC	No	No	1	NTRK1_exon_chr1:156881456	1	1	0	NA	1
1260	PEAR1	35.9244	31.2133	-0.3492	1	NC	No	No	1	PEAR1_exon_chr1:156914646	1	1	0	NA	1
1261	ARHGEF11	27.3429	33.4634	0.2337	1	NC	No	No	2	ARHGEF11_exon_chr1:156936244	0.5292	0.484	-0.0452	NA	1
1262	ARHGEF11									ARHGEF11_exon_chr1:157045370	0.4576	0.5126	0.0549	NA	1
1263	ETV3	52.2626	58.5553	0.1986	1	NC	No	No	1	ETV3_exon_chr1:157125979	1	1	0	NA	3	91.16	93.65	2.49	NA
1264	KIRREL1-IT1	10.6671	14.0576	0.3527	1	NC	No	No	2	KIRREL1-IT1_exon_chr1:158025549	0.8993	0.9486	0.0493	NA	1
1265	KIRREL1-IT1									KIRREL1-IT1_exon_chr1:158030716	0.1007	0.0514	-0.0493	NA	1
1266	KIRREL1	18.6362	18.6055	0.0099	1	NC	No	No	1	KIRREL1_exon_chr1:158094643	1	1	0	NA	4	44.31	34.09	-10.22	NA
1267	DUSP23	449.738	401.986	-0.1558	0.365589	NC	No	No	1	DUSP23_exon_chr1:159782152	1	1	0	NA	1
1268	TAGLN2	2581.39	2472.49	-0.0674	0.512542	NC	No	No	1	TAGLN2_exon_chr1:159919376	1	1	0	NA	1
1269	IGSF9	9.9088	5.86	-0.8949	1	NC	No	No	1	IGSF9_exon_chr1:159927526	1	1	0	NA	1
1270	PIGM	33.4545	26.6293	-0.3752	1	NC	No	No	1	PIGM_exon_chr1:160031990	1	1	0	NA	8	17.04	7.76	-9.27	NA
1271	IGSF8	51.9415	42.1411	-0.2346	1	NC	No	No	1	IGSF8_exon_chr1:160091631	1	1	0	NA	1
1272	PEA15	198.34	203.725	0.0434	1	NC	No	No	1	PEA15_exon_chr1:160213421	1	1	0	NA	3	76.45	76.69	0.25	NA
1273	AL139011.2	253.304	246.186	-0.0545	0.9352	NC	No	No	3	AL139011.2_exon_chr1:160218440	0.7031	0.6274	-0.0757	NA	4	54.88	53.06	-1.82	NA
1274	AL139011.2									AL139011.2_exon_chr1:160240370	0.0913	0.0754	-0.0159	NA	2	42.66	55.6	12.95	NA
1275	AL139011.2									AL139011.2_exon_chr1:160280246	0.2056	0.2972	0.0916	NA	5	30.56	26.02	-4.53	NA
1276	DCAF8	22.9134	21.1248	-0.1935	1	NC	No	No	1	DCAF8_exon_chr1:160231407	1	1	0	NA	1
1277	COPA	242.108	238.539	0.0067	1	NC	No	No	1	COPA_exon_chr1:160290216	1	1	0	NA	5	88.31	87.22	-1.09	NA
1278	NCSTN	121.859	174.356	0.5568	0.0219088	UP	No	No	1	NCSTN_exon_chr1:160358148	1	1	0	NA	1
1279	AL354714.2	42.7063	35.5937	-0.2613	1	NC	No	No	1	AL354714.2_exon_chr1:160894979	1	1	0	NA	1
1280	AL591806.4	237.847	252.106	0.0946	0.785301	NC	No	No	1	AL591806.4_exon_chr1:160998906	1	1	0	NA	9	62.47	65.24	2.76	NA
1281	TSTD1	1292.38	1132.98	-0.1928	0.0340013	NC	No	No	1	TSTD1_exon_chr1:161038729	1	1	0	NA	1
1282	PFDN2	1015.66	1274.25	0.3251	0.000125821	NC	No	No	1	PFDN2_exon_chr1:161100859	1	1	0	NA	2	90.55	90.11	-0.43	NA
1283	DEDD	184.572	194.509	0.082	0.856712	NC	No	No	1	DEDD_exon_chr1:161122523	1	1	0	NA	6	50.15	51.4	1.25	NA
1284	NIT1	181.155	221.65	0.2732	0.268559	NC	No	No	1	NIT1_exon_chr1:161120498	1	1	0	NA	1
1285	UFC1	255.151	264.056	0.041	1	NC	No	No	1	UFC1_exon_chr1:161156949	1	1	0	NA	1
1286	USP21	24.0525	24.585	0.0204	1	NC	No	No	1	USP21_exon_chr1:161165356	1	1	0	NA	1
1287	PPOX	97.6221	96.879	-0.0593	1	NC	No	No	1	PPOX_exon_chr1:161170906	1	1	0	NA	1
1288	B4GALT3	146.422	138.084	-0.0758	1	NC	No	No	1	B4GALT3_exon_chr1:161172089	1	1	0	NA	1
1289	NDUFS2	271.74	203.95	-0.4308	0.00984673	DOWN	No	No	1	NDUFS2_exon_chr1:161213249	1	1	0	NA	1
1290	TOMM40L	84.4284	82.1169	-0.0053	1	NC	No	No	1	TOMM40L_exon_chr1:161228185	1	1	0	NA	2	27.43	24.35	-3.07	NA
1291	MPZ	23.6095	19.4015	-0.4025	1	NC	No	No	1	MPZ_exon_chr1:161306190	1	1	0	NA	1
1292	SDHC	298.251	275.604	-0.1255	0.693658	NC	No	No	1	SDHC_exon_chr1:161362328	1	1	0	NA	12	16.23	12.52	-3.71	NA
1293	AL592295.1	48.7728	55.3243	0.1411	1	NC	No	No	1	AL592295.1_exon_chr1:161406472	1	1	0	NA	1
1294	DUSP12	103.82	110.618	0.0955	0.966494	NC	No	No	1	DUSP12_exon_chr1:161756785	1	1	0	NA	1
1295	ATF6	43.384	39.7919	-0.0701	1	NC	No	No	1	ATF6_exon_chr1:161958445	1	1	0	NA	6	44.24	47.57	3.33	NA
1296	OLFML2B	14.6074	17.043	0.119	1	NC	No	No	1	OLFML2B_exon_chr1:161984276	1	1	0	NA	1
1297	NOS1AP	32.5438	26.2025	-0.3142	1	NC	No	No	1	NOS1AP_exon_chr1:162287343	1	1	0	NA	1
1298	AL512785.2	47.3107	57.4468	0.2164	1	NC	No	No	1	AL512785.2_exon_chr1:162383181	1	1	0	NA	1
1299	UHMK1	646.508	649.661	0.0204	0.810304	NC	No	No	1	UHMK1_exon_chr1:162522403	1	1	0	NA	1
1300	UAP1	120.731	144.261	0.2549	0.644832	NC	No	No	1	UAP1_exon_chr1:162599270	1	1	0	NA	1
1301	HSD17B7	148.503	150.795	0.0057	1	NC	No	No	1	HSD17B7_exon_chr1:162812297	1	1	0	NA	1
1302	RGS5	12.4496	9.7659	-0.1684	1	NC	No	No	1	RGS5_exon_chr1:163147503	1	1	0	NA	3	8.66	18.6	9.94	NA
1303	NUF2	64.2588	70.5637	0.1326	1	NC	No	No	2	NUF2_exon_chr1:163343732	0.1288	0.0484	-0.0805	NA	1
1304	NUF2									NUF2_exon_chr1:163355334	0.8712	0.9484	0.0772	NA	2	89.07	88.64	-0.43	NA
1305	PBX1	10.937	11.9458	0.089	1	NC	No	No	1	PBX1_exon_chr1:164846583	1	1	0	NA	3	66.17	74.53	8.36	NA
1306	MGST3	146.592	148.111	0.0602	1	NC	No	No	1	MGST3_exon_chr1:165655367	1	1	0	NA	4	89.6	84.62	-4.98	NA
1307	ALDH9A1	199.851	216.053	0.1563	0.649548	NC	No	No	1	ALDH9A1_exon_chr1:165663144	1	1	0	NA	1
1308	TMCO1	467.869	517.42	0.1275	0.555524	NC	No	No	2	TMCO1_exon_chr1:165728121	0.8236	0.8318	0.0082	NA	8	72.45	72.68	0.23	NA
1309	TMCO1									TMCO1_exon_chr1:165759584	0.1423	0.145	0.0027	NA	1
1310	MIR3658	418.475	432.402	0.0462	0.882776	NC	No	No	1	MIR3658_exon_chr1:165907683	1	1	0	NA	4	29.39	34.67	5.28	NA
1311	POGK	277.828	319.871	0.2142	0.241954	NC	No	No	1	POGK_exon_chr1:166848937	1	1	0	NA	1
1312	TADA1	59.5898	56.3453	-0.043	1	NC	No	No	1	TADA1_exon_chr1:166857719	1	1	0	NA	1
1313	POU2F1	23.8348	24.1533	-0.0425	1	NC	No	No	1	POU2F1_exon_chr1:167415499	1	1	0	NA	2	46.08	50.69	4.61	NA
1314	CREG1	294.871	283.648	-0.0612	0.918028	NC	No	No	1	CREG1_exon_chr1:167542301	1	1	0	NA	1
1315	MPZL1	398.316	413.54	0.0607	0.879816	NC	No	No	1	MPZL1_exon_chr1:167787819	1	1	0	NA	10	74.74	76.27	1.54	NA
1316	MPC2	168.216	176.529	0.103	0.815259	NC	No	No	1	MPC2_exon_chr1:167918359	1	1	0	NA	5	10.88	18.72	7.83	NA
1317	GCSHP5	334.299	335.508	0.0088	1	NC	No	No	1	GCSHP5_exon_chr1:168056422	1	1	0	NA	1
1318	DCAF6	129.23	135.218	0.0481	1	NC	No	No	1	DCAF6_exon_chr1:168075370	1	1	0	NA	3	77.51	72.78	-4.73	NA
1319	GPR161	229.834	190.248	-0.2747	0.205114	NC	No	No	1	GPR161_exon_chr1:168085796	1	1	0	NA	4	44.47	44.2	-0.26	NA
1320	TIPRL	218.726	197.309	-0.1218	0.807453	NC	No	No	1	TIPRL_exon_chr1:168199902	1	1	0	NA	3	52.82	50.29	-2.53	NA
1321	SFT2D2	41.5568	51.9183	0.336	0.962831	NC	No	No	1	SFT2D2_exon_chr1:168242500	1	1	0	NA	5	84.94	86.25	1.31	NA
1322	TBX19	8.7514	7.2944	-0.3437	1	NC	No	No	1	TBX19_exon_chr1:168312707	1	1	0	NA	1
1323	ATP1B1	254.238	310	0.2817	0.184759	NC	No	No	1	ATP1B1_exon_chr1:169131291	1	1	0	NA	3	92.85	93.08	0.23	NA
1324	NME7	102.882	83.0376	-0.2649	1	NC	No	No	1	NME7_exon_chr1:169132817	1	1	0	NA	1
1325	BLZF1	36.7011	37.2068	0.0033	1	NC	No	No	1	BLZF1_exon_chr1:169386996	1	1	0	NA	7	85.95	88.33	2.38	NA
1326	SLC19A2	25.6931	30.0337	0.2178	1	NC	No	No	1	SLC19A2_exon_chr1:169465977	1	1	0	NA	1
1327	METTL18	39.187	41.8484	0.0695	1	NC	No	No	1	METTL18_exon_chr1:169793897	1	1	0	NA	4	86.94	92.3	5.36	NA
1328	SCYL3	13.45	14.5208	0.1887	1	NC	No	No	1	SCYL3_exon_chr1:169853772	1	1	0	NA	3	32.97	27.48	-5.5	NA
1329	C1orf112	65.3083	59.1224	-0.1299	1	NC	No	No	1	C1orf112_exon_chr1:169852789	1	1	0	NA	2	16.3	15.78	-0.52	NA
1330	KIFAP3	51.1036	31.6788	-0.6347	0.336334	NC	No	No	1	KIFAP3_exon_chr1:169921781	1	1	0	NA	1
1331	GORAB	15.9215	12.7353	-0.3405	1	NC	No	No	1	GORAB_exon_chr1:170552014	1	1	0	NA	1
1332	FMO4	8.6868	5.5235	-0.6561	1	NC	No	No	2	FMO4_exon_chr1:171332708	0.9175	0.8486	-0.0688	NA	1
1333	FMO4									FMO4_exon_chr1:171341412	0.0825	0.1514	0.0688	NA	1
1334	PRRC2C	8057.14	8271.45	0.0373	0.782408	NC	No	No	2	PRRC2C_exon_chr1:171532342	0.8968	0.8784	-0.0184	NA	3	96.03	96.24	0.21	NA
1335	PRRC2C									PRRC2C_exon_chr1:171591586	0.0682	0.0812	0.013	NA	1
1336	VAMP4	14.4711	7.0049	-0.8278	1	NC	No	No	1	VAMP4_exon_chr1:171704534	1	1	0	NA	6	39.54	23.17	-16.37	NA
1337	EEF1AKNMT	95.2028	106.932	0.1506	0.962285	NC	No	No	1	EEF1AKNMT_exon_chr1:171796481	1	1	0	NA	3	52.49	42.16	-10.33	NA
1338	PIGC	43.5821	47.5086	0.1756	1	NC	No	No	1	PIGC_exon_chr1:172444086	1	1	0	NA	1
1339	DNM3	7.2395	7.3798	0.1239	1	NC	No	No	2	DNM3_exon_chr1:172407771	0.7009	0.7689	0.0681	NA	1
1340	DNM3									DNM3_exon_chr1:172418280	0.2991	0.2156	-0.0835	NA	1
1341	SUCO	90.5356	113.914	0.3272	0.454945	NC	No	No	1	SUCO_exon_chr1:172609815	1	1	0	NA	1
1342	PRDX6	2106.82	2154.06	0.0333	0.748195	NC	No	No	1	PRDX6_exon_chr1:173487734	1	1	0	NA	6	36.34	32.47	-3.86	NA
1343	KLHL20	22.555	15.7785	-0.6171	1	NC	No	No	1	KLHL20_exon_chr1:173785162	1	1	0	NA	6	73.33	88.16	14.83	NA
1344	CENPL	27.0347	33.8037	0.3502	1	NC	No	No	2	CENPL_exon_chr1:173800519	0.8918	0.8176	-0.0742	NA	3	97.49	90.44	-7.05	NA
1345	CENPL									CENPL_exon_chr1:173824473	0.1082	0.1824	0.0742	NA	2	28.81	6.4	-22.41	NA
1346	DARS2	226.489	206.896	-0.1112	0.795202	NC	No	No	1	DARS2_exon_chr1:173856665	1	1	0	NA	7	67.23	63.46	-3.77	NA
1347	GAS5	1001.99	919.519	-0.1284	0.228816	NC	No	No	1	GAS5_exon_chr1:173867815	1	1	0	NA	1
1348	ZBTB37	11.1814	12.6037	0.2986	1	NC	No	No	1	ZBTB37_exon_chr1:173885635	1	1	0	NA	5	94.45	75.09	-19.36	NA
1349	RC3H1	69.6248	77.8945	0.1916	1	NC	No	No	1	RC3H1_exon_chr1:173938874	1	1	0	NA	9	81.54	89.36	7.82	NA
1350	RABGAP1L	82.9389	84.9283	0.0018	1	NC	No	No	2	RABGAP1L_exon_chr1:174957890	0.6932	0.8349	0.1418	NA	1
1351	RABGAP1L									RABGAP1L_exon_chr1:174989848	0.2283	0.1251	-0.1032	NA	4	79.51	92.52	13	NA
1352	CACYBP	784.845	790.105	0.0147	0.818493	NC	No	No	1	CACYBP_exon_chr1:175009922	1	1	0	NA	8	25.05	25.74	0.69	NA
1353	MRPS14	150.151	148.371	-0.0061	1	NC	No	No	1	MRPS14_exon_chr1:175014851	1	1	0	NA	5	89.38	91.82	2.44	NA
1354	KIAA0040	93.2583	93.6233	0.0181	1	NC	No	No	1	KIAA0040_exon_chr1:175161146	1	1	0	NA	6	74.03	71.29	-2.74	NA
1355	COP1	162.102	171.838	0.0922	0.89849	NC	No	No	1	COP1_exon_chr1:175945170	1	1	0	NA	1
1356	CRYZL2P	28.7056	21.4156	-0.4967	1	NC	No	No	1	CRYZL2P_exon_chr1:178008149	1	1	0	NA	1
1357	RASAL2	29.8144	42.4914	0.4917	0.664723	NC	No	No	1	RASAL2_exon_chr1:178473074	1	1	0	NA	6	86.33	89.9	3.57	NA
1358	RALGPS2	41.7198	50.2467	0.1988	1	NC	No	No	1	RALGPS2_exon_chr1:178916329	1	1	0	NA	10	63.6	56.92	-6.68	NA
1359	FAM20B	238.704	232.934	-0.0048	1	NC	No	No	1	FAM20B_exon_chr1:179071912	1	1	0	NA	1
1360	TOR3A	520.824	536.494	0.0488	0.91087	NC	No	No	1	TOR3A_exon_chr1:179094967	1	1	0	NA	1
1361	ABL2	29.8032	50.0723	0.7102	0.245674	NC	No	No	1	ABL2_exon_chr1:179109441	1	1	0	NA	5	38.36	43.12	4.75	NA
1362	SOAT1	84.8403	97.9378	0.2266	1	NC	No	No	1	SOAT1_exon_chr1:179353584	1	1	0	NA	16	27.45	26.23	-1.21	NA
1363	TOR1AIP2	435.452	431.21	-0.0262	0.873978	NC	No	No	3	TOR1AIP2_exon_chr1:179846828	0.4039	0.4236	0.0197	NA	12	57.09	59.95	2.87	NA
1364	TOR1AIP2									TOR1AIP2_exon_chr1:179847636	0.1898	0.1565	-0.0333	NA	1
1365	TOR1AIP2									TOR1AIP2_exon_chr1:179865854	0.4005	0.4118	0.0113	NA	7	47.9	49.53	1.63	NA
1366	TOR1AIP1	69.5786	83.1394	0.2553	1	NC	No	No	1	TOR1AIP1_exon_chr1:179917451	1	1	0	NA	7	25.68	24.24	-1.45	NA
1367	CEP350	128.609	135.941	0.05	1	NC	No	No	4	CEP350_exon_chr1:180013846	0.1068	0.1552	0.0484	NA	2	90.93	88.56	-2.36	NA
1368	CEP350									CEP350_exon_chr1:180075021	0.1469	0.1052	-0.0417	NA	2	85.15	95.81	10.66	NA
1369	CEP350									CEP350_exon_chr1:180084017	0.0738	0.0542	-0.0196	NA	3	19.14	10.22	-8.92	NA
1370	CEP350									CEP350_exon_chr1:180110996	0.5563	0.5761	0.0199	NA	3	80.03	84.34	4.3	NA
1371	QSOX1	239.305	235.897	-0.0011	1	NC	No	No	1	QSOX1_exon_chr1:180196261	1	1	0	NA	6	41.69	34.97	-6.72	NA
1372	ACBD6	145.594	141.344	-0.0327	1	NC	No	No	3	ACBD6_exon_chr1:180271971	0.0523	0.0637	0.0114	NA	1
1373	ACBD6									ACBD6_exon_chr1:180288517	0.8802	0.8677	-0.0125	NA	1
1374	ACBD6									ACBD6_exon_chr1:180413471	0.0601	0.0528	-0.0072	NA	1
1375	XPR1	151.641	138.216	-0.099	1	NC	No	No	1	XPR1_exon_chr1:180884005	1	1	0	NA	10	69.43	66.74	-2.68	NA
1376	AL162431.1	146.422	124.128	-0.2294	0.645804	NC	No	No	1	AL162431.1_exon_chr1:180976646	1	1	0	NA	8	73.02	70.93	-2.09	NA
1377	KIAA1614-AS1	14.6042	9.7659	-0.3963	1	NC	No	No	1	KIAA1614-AS1_exon_chr1:180950918	1	1	0	NA	1
1378	MR1	8.7099	15.1453	0.7352	1	NC	No	No	2	MR1_exon_chr1:181050010	0.1686	0.2635	0.0948	NA	1
1379	MR1									MR1_exon_chr1:181055224	0.8314	0.7365	-0.0948	NA	6	36.99	31.12	-5.86	NA
1380	IER5	171.049	193.915	0.175	0.628027	NC	No	No	1	IER5_exon_chr1:181088699	1	1	0	NA	1
1381	EIF1P3	438.791	516.143	0.2246	0.119111	NC	No	No	1	EIF1P3_exon_chr1:182336000	1	1	0	NA	1
1382	GLUL	319.134	261.679	-0.2787	0.208076	NC	No	No	1	GLUL_exon_chr1:182387292	1	1	0	NA	1
1383	RNASEL	11.5151	10.4332	-0.0956	1	NC	No	No	2	RNASEL_exon_chr1:182575578	0.9074	0.9638	0.0564	NA	2	71.48	77.79	6.31	NA
1384	RNASEL									RNASEL_exon_chr1:182576389	0.0926	0.0362	-0.0564	NA	1
1385	AL355999.1	13.806	17.5713	0.3088	1	NC	No	No	1	AL355999.1_exon_chr1:182837934	1	1	0	NA	1
1386	DHX9	400.157	373.586	-0.1076	0.598109	NC	No	No	2	DHX9_exon_chr1:182839733	0.0497	0.0571	0.0075	NA	1
1387	DHX9									DHX9_exon_chr1:182887082	0.8999	0.8967	-0.0032	NA	6	91.71	89.51	-2.2	NA
1388	HMGN1P4	42.8514	32.2563	-0.4293	1	NC	No	No	1	HMGN1P4_exon_chr1:182942404	1	1	0	NA	2	63.95	73.14	9.2	NA
1389	LAMC1	221.155	255.048	0.205	0.429975	NC	No	No	2	LAMC1_exon_chr1:183137668	0.2915	0.3045	0.013	NA	1
1390	LAMC1									LAMC1_exon_chr1:183142533	0.6906	0.6622	-0.0283	NA	6	50.71	65.67	14.96	NA
1391	LAMC2	41.8203	47.7696	0.2174	1	NC	No	No	2	LAMC2_exon_chr1:183237351	0.2266	0.087	-0.1396	NA	1
1392	LAMC2									LAMC2_exon_chr1:183243146	0.7734	0.913	0.1396	NA	4	63.2	55.02	-8.18	NA
1393	SMG7	73.5871	81.3131	0.1182	1	NC	No	No	2	SMG7_exon_chr1:183545965	0.2614	0.233	-0.0284	NA	1
1394	SMG7									SMG7_exon_chr1:183551817	0.7386	0.767	0.0284	NA	6	86.72	82.39	-4.33	NA
1395	ARPC5	306.1	337.913	0.1495	0.545284	NC	No	No	1	ARPC5_exon_chr1:183627594	1	1	0	NA	1
1396	TSEN15	246.806	214.525	-0.185	0.491097	NC	No	No	2	TSEN15_exon_chr1:184072050	0.8123	0.8222	0.0099	NA	1
1397	TSEN15									TSEN15_exon_chr1:184093624	0.1862	0.1732	-0.013	NA	1
1398	C1orf21	29.0218	36.8824	0.2851	1	NC	No	No	2	C1orf21_exon_chr1:184507587	0.0988	0.0665	-0.0323	NA	1
1399	C1orf21									C1orf21_exon_chr1:184619517	0.9012	0.9335	0.0323	NA	6	13.26	14.56	1.3	NA
1400	EDEM3	38.8958	42.6165	0.1718	1	NC	No	No	1	EDEM3_exon_chr1:184694472	1	1	0	NA	1
1401	NIBAN1	26.215	29.9881	0.1139	1	NC	No	No	1	NIBAN1_exon_chr1:184796097	1	1	0	NA	4	27.77	42.92	15.15	NA
1402	RNF2	159.446	140.183	-0.158	0.96996	NC	No	No	1	RNF2_exon_chr1:185100199	1	1	0	NA	8	56.17	55.57	-0.6	NA
1403	TRMT1L	58.6396	62.3199	0.1429	1	NC	No	No	1	TRMT1L_exon_chr1:185120271	1	1	0	NA	8	58.87	64.06	5.19	NA
1404	SWT1	18.9061	20.0593	0.1076	1	NC	No	No	2	SWT1_exon_chr1:185160832	0.5148	0.3622	-0.1526	NA	1
1405	SWT1									SWT1_exon_chr1:185290673	0.4852	0.6378	0.1526	NA	4	69.22	78.38	9.16	NA
1406	AL356273.3	6.1467	7.7062	0.2017	1	NC	No	No	1	AL356273.3_exon_chr1:185294372	1	1	0	NA	2	0.86	15.1	14.24	NA
1407	IVNS1ABP	298.127	330.714	0.1441	0.533571	NC	No	No	1	IVNS1ABP_exon_chr1:185300918	1	1	0	NA	12	33.45	32.37	-1.07	NA
1408	RNU6-1240P	112.375	109.174	-0.02	1	NC	No	No	1	RNU6-1240P_exon_chr1:186314026	1	1	0	NA	1
1409	TPR	1088.99	1045.01	-0.0597	0.645998	NC	No	No	6	TPR_exon_chr1:186336694	0.105	0.1052	0.0002	NA	2	41.3	42.55	1.24	NA
1410	TPR									TPR_exon_chr1:186343473	0.056	0.0634	0.0074	NA	4	52.58	50.89	-1.7	NA
1411	TPR									TPR_exon_chr1:186360905	0.0897	0.0997	0.01	NA	1
1412	TPR									TPR_exon_chr1:186363001	0.1862	0.1856	-0.0006	NA	2	88.74	88.62	-0.12	NA
1413	TPR									TPR_exon_chr1:186367982	0.1065	0.1132	0.0067	NA	1
1414	TPR									TPR_exon_chr1:186371043	0.1798	0.1475	-0.0323	NA	1
1415	ODR4	119.689	111.418	-0.1297	1	NC	No	No	1	ODR4_exon_chr1:186419008	1	1	0	NA	8	58.54	60.37	1.83	NA
1416	PLA2G4A	30.1138	30.0583	0.0792	1	NC	No	No	1	PLA2G4A_exon_chr1:186988376	1	1	0	NA	1
1417	RGS2	103.593	35.1781	-1.6772	3.59783e-08	DOWN	No	No	1	RGS2_exon_chr1:192810165	1	1	0	NA	1
1418	AL390957.1	25.7848	21.6988	-0.3018	1	NC	No	No	1	AL390957.1_exon_chr1:192935903	1	1	0	NA	1
1419	UCHL5	285.253	269.959	-0.0749	0.915548	NC	No	No	2	UCHL5_exon_chr1:193016395	0.8848	0.8701	-0.0148	NA	16	30.71	29.23	-1.48	NA
1420	UCHL5									UCHL5_exon_chr1:193023039	0.0856	0.0971	0.0115	NA	1
1421	SCARNA18B	7.6585	5.9396	-0.2805	1	NC	No	No	1	SCARNA18B_exon_chr1:193057415	1	1	0	NA	1
1422	RO60	249.988	221.076	-0.1549	0.564312	NC	No	No	2	RO60_exon_chr1:193084578	0.1445	0.2554	0.1109	NA	12	30.85	35.99	5.14	NA
1423	RO60									RO60_exon_chr1:193091650	0.8336	0.7315	-0.1021	NA	2	93.98	94.97	0.99	NA
1424	GLRX2	201.974	183.282	-0.1291	0.76353	NC	No	No	2	GLRX2_exon_chr1:193095249	0.0806	0.0602	-0.0204	NA	3	61.08	59.25	-1.83	NA
1425	GLRX2									GLRX2_exon_chr1:193096759	0.9194	0.9398	0.0204	NA	1
1426	CDC73	132.906	142.586	0.0694	1	NC	No	No	3	CDC73_exon_chr1:193150303	0.1156	0.1115	-0.0041	NA	1
1427	CDC73									CDC73_exon_chr1:193232992	0.0712	0.0848	0.0137	NA	1
1428	CDC73									CDC73_exon_chr1:193250675	0.7698	0.7505	-0.0193	NA	13	45.57	48.99	3.42	NA
1429	ASPM	348.03	382.908	0.1295	0.500408	NC	No	No	4	ASPM_exon_chr1:197084426	0.3038	0.2753	-0.0285	NA	2	26.87	29.03	2.16	NA
1430	ASPM									ASPM_exon_chr1:197105185	0.3182	0.3498	0.0316	NA	6	70.56	77.28	6.72	NA
1431	ASPM									ASPM_exon_chr1:197143810	0.2999	0.2942	-0.0058	NA	4	70.29	62.85	-7.44	NA
1432	ASPM									ASPM_exon_chr1:197144100	0.0759	0.0731	-0.0028	NA	1
1433	ZBTB41	23.5648	18.4665	-0.2101	1	NC	No	No	1	ZBTB41_exon_chr1:197160014	1	1	0	NA	5	50.32	57.34	7.02	NA
1434	DENND1B	32.5774	42.9803	0.3681	0.901129	NC	No	No	2	DENND1B_exon_chr1:197510972	0.8033	0.9094	0.106	NA	6	83.34	60.63	-22.71	NA
1435	DENND1B									DENND1B_exon_chr1:197541015	0.1856	0.0659	-0.1198	NA	1
1436	C1orf53	37.912	46.0229	0.2821	1	NC	No	No	1	C1orf53_exon_chr1:197907148	1	1	0	NA	3	92.48	91.44	-1.04	NA
1437	NEK7	106.24	76.7534	-0.4236	0.668153	NC	No	No	1	NEK7_exon_chr1:198319411	1	1	0	NA	1
1438	AC096631.2	261.516	245.657	-0.103	0.763202	NC	No	No	1	AC096631.2_exon_chr1:198949015	1	1	0	NA	1
1439	ZNF281	59.3075	60.4859	0.0474	1	NC	No	No	1	ZNF281_exon_chr1:200409723	1	1	0	NA	6	87.31	83.08	-4.23	NA
1440	KIF14	131.393	117.74	-0.1069	0.906471	NC	No	No	3	KIF14_exon_chr1:200553767	0.7906	0.7772	-0.0134	NA	1
1441	KIF14									KIF14_exon_chr1:200589369	0.1379	0.1581	0.0202	NA	3	63.18	61.94	-1.24	NA
1442	KIF14									KIF14_exon_chr1:200618838	0.0715	0.0646	-0.0069	NA	1
1443	DDX59	33.4489	26.974	-0.2136	1	NC	No	No	4	DDX59_exon_chr1:200641256	0.1198	0.1308	0.011	NA	2	60.98	87.23	26.25	NA
1444	DDX59									DDX59_exon_chr1:200644517	0.5568	0.683	0.1261	NA	2	32.02	28.96	-3.05	NA
1445	DDX59									DDX59_exon_chr1:200649226	0.0648	0.0868	0.022	NA	1
1446	DDX59									DDX59_exon_chr1:200650676	0.2586	0.0995	-0.1591	NA	1
1447	CAMSAP2	219.826	287.57	0.3841	0.0271344	UP	No	No	3	CAMSAP2_exon_chr1:200848031	0.5474	0.6079	0.0605	NA	7	10.17	6.77	-3.4	NA
1448	CAMSAP2									CAMSAP2_exon_chr1:200852540	0.0745	0.0705	-0.0039	NA	2	59.23	74.35	15.12	NA
1449	CAMSAP2									CAMSAP2_exon_chr1:200857305	0.3682	0.3056	-0.0626	NA	5	73.48	78.33	4.85	NA
1450	INAVA	19.5336	20.3633	0.0623	1	NC	No	No	1	INAVA_exon_chr1:200913536	1	1	0	NA	1
1451	KIF21B	9.5511	10.1248	0.0933	1	NC	No	No	1	KIF21B_exon_chr1:200974194	1	1	0	NA	3	85.01	98.96	13.95	NA
1452	ASCL5	5.793	12.3828	1.0482	1	NC	No	No	1	ASCL5_exon_chr1:201115877	1	1	0	NA	1
1453	TMEM9	159.144	148.225	-0.1201	0.980849	NC	No	No	1	TMEM9_exon_chr1:201135815	1	1	0	NA	2	89.81	95.01	5.2	NA
1454	LAD1	110.522	145.099	0.3658	0.303047	NC	No	No	1	LAD1_exon_chr1:201381893	1	1	0	NA	1
1455	AC096677.2	218.041	201.757	-0.1136	0.756639	NC	No	No	1	AC096677.2_exon_chr1:201466178	1	1	0	NA	1
1456	CSRP1	458.355	423.459	-0.1096	0.525757	NC	No	No	1	CSRP1_exon_chr1:201484789	1	1	0	NA	1
1457	AC096677.1	18.4879	12.1759	-0.4944	1	NC	No	No	1	AC096677.1_exon_chr1:201533447	1	1	0	NA	2	61.88	69.14	7.27	NA
1458	NAV1	62.6752	75.435	0.2735	0.973809	NC	No	No	1	NAV1_exon_chr1:201819836	1	1	0	NA	5	33.22	33.06	-0.16	NA
1459	IPO9	297.055	302.381	0.0223	0.921189	NC	No	No	1	IPO9_exon_chr1:201875943	1	1	0	NA	22	38.24	39.75	1.51	NA
1460	SHISA4	148.061	160.558	0.1222	0.820516	NC	No	No	1	SHISA4_exon_chr1:201891799	1	1	0	NA	1
1461	TIMM17A	703.478	720.618	0.0339	0.802182	NC	No	No	1	TIMM17A_exon_chr1:201969468	1	1	0	NA	8	70.58	71.61	1.02	NA
1462	RNPEP	179.958	165.838	-0.1175	0.802734	NC	No	No	1	RNPEP_exon_chr1:202005557	1	1	0	NA	1
1463	AL691482.3	106.376	88.6311	-0.2509	1	NC	No	No	1	AL691482.3_exon_chr1:202014885	1	1	0	NA	6	16.74	10.23	-6.51	NA
1464	ARL8A	43.14	45.5665	0.0799	1	NC	No	No	1	ARL8A_exon_chr1:202134516	1	1	0	NA	1
1465	UBE2T	161.172	177.24	0.1074	0.837308	NC	No	No	1	UBE2T_exon_chr1:202331960	1	1	0	NA	2	94.75	95.46	0.71	NA
1466	AC099336.2	13441.8	13570	0.0136	0.787413	NC	No	No	1	AC099336.2_exon_chr1:202472117	1	1	0	NA	1
1467	PPP1R12B	18.2203	14.8884	-0.2317	1	NC	No	No	1	PPP1R12B_exon_chr1:202580473	1	1	0	NA	1
1468	KDM5B	48.2608	48.8781	0.0265	1	NC	No	No	2	KDM5B_exon_chr1:202734315	0.8578	0.8176	-0.0403	NA	8	59.43	71.6	12.16	NA
1469	KDM5B									KDM5B_exon_chr1:202762945	0.1043	0.1377	0.0334	NA	1
1470	AC098934.3	8.2414	7.6013	-0.0364	1	NC	No	No	1	AC098934.3_exon_chr1:202767418	1	1	0	NA	2	93.95	92.23	-1.72	NA
1471	RABIF	46.1844	36.301	-0.3183	0.973727	NC	No	No	1	RABIF_exon_chr1:202881223	1	1	0	NA	7	26.84	33.42	6.58	NA
1472	KLHL12	37.9023	36.2569	-0.1213	1	NC	No	No	1	KLHL12_exon_chr1:202892659	1	1	0	NA	5	75.91	84	8.09	NA
1473	ADIPOR1	604.582	713.943	0.2483	0.0419526	NC	No	No	1	ADIPOR1_exon_chr1:202941701	1	1	0	NA	1
1474	CYB5R1	53.1046	62.6287	0.2595	1	NC	No	No	1	CYB5R1_exon_chr1:202963559	1	1	0	NA	1
1475	TMEM183A	287.38	294.823	0.0384	0.954754	NC	No	No	1	TMEM183A_exon_chr1:203022854	1	1	0	NA	7	32.88	29.59	-3.3	NA
1476	PPFIA4	26.3948	22.9262	-0.162	1	NC	No	No	1	PPFIA4_exon_chr1:203075576	1	1	0	NA	1
1477	ADORA1	28.525	18.8061	-0.5547	1	NC	No	No	1	ADORA1_exon_chr1:203165055	1	1	0	NA	1
1478	BTG2	104.894	132.385	0.3947	0.227641	NC	No	No	1	BTG2_exon_chr1:203307103	1	1	0	NA	1
1479	AL513343.1	79.566	62.524	-0.3505	0.830898	NC	No	No	1	AL513343.1_exon_chr1:203657760	1	1	0	NA	1
1480	ATP2B4	235.411	178.748	-0.4062	0.0285005	DOWN	No	No	2	ATP2B4_exon_chr1:203700797	0.2605	0.2524	-0.0081	NA	1
1481	ATP2B4									ATP2B4_exon_chr1:203739545	0.7303	0.7436	0.0133	NA	3	91.36	89.36	-2	NA
1482	ZC3H11A	7.9954	7.5362	0.0849	1	NC	No	No	1	ZC3H11A_exon_chr1:203847183	1	1	0	NA	2	59.18	26.84	-32.33	NA
1483	ZBED6	220.24	213.26	-0.0395	1	NC	No	No	1	ZBED6_exon_chr1:203852140	1	1	0	NA	4	89.78	90.47	0.69	NA
1484	SNRPE	1089.5	991.082	-0.1353	0.181719	NC	No	No	1	SNRPE_exon_chr1:203869876	1	1	0	NA	4	35.13	33.18	-1.95	NA
1485	HSPE1P6	117.712	132.17	0.1487	0.801797	NC	No	No	1	HSPE1P6_exon_chr1:203904013	1	1	0	NA	1
1486	SOX13	23.3212	27.5675	0.2457	1	NC	No	No	1	SOX13_exon_chr1:204125857	1	1	0	NA	2	76.92	83.76	6.83	NA
1487	ETNK2	37.7731	57.4895	0.5471	0.457689	NC	No	No	1	ETNK2_exon_chr1:204132256	1	1	0	NA	1
1488	KISS1	8.3546	8.2627	-0.1247	1	NC	No	No	1	KISS1_exon_chr1:204190797	1	1	0	NA	1
1489	GOLT1A	57.9965	54.9047	-0.0532	1	NC	No	No	1	GOLT1A_exon_chr1:204198496	1	1	0	NA	1
1490	PLEKHA6	11.2436	8.54	-0.4951	1	NC	No	No	1	PLEKHA6_exon_chr1:204222779	1	1	0	NA	3	45.92	43.16	-2.75	NA
1491	AL592114.1	100.803	89.2821	-0.2246	1	NC	No	No	1	AL592114.1_exon_chr1:204347258	1	1	0	NA	2	40.34	50.56	10.23	NA
1492	PPP1R15B	197.338	200.734	0.0334	1	NC	No	No	1	PPP1R15B_exon_chr1:204406313	1	1	0	NA	7	73.91	78.07	4.16	NA
1493	PIK3C2B	6.9074	6.3397	-0.1512	1	NC	No	No	1	PIK3C2B_exon_chr1:204425040	1	1	0	NA	1
1494	MDM4	148.01	181.171	0.3061	0.246566	NC	No	No	1	MDM4_exon_chr1:204549112	1	1	0	NA	12	88.94	88.28	-0.65	NA
1495	LRRN2	20.2688	13.3947	-0.4796	1	NC	No	No	1	LRRN2_exon_chr1:204622205	1	1	0	NA	1
1496	TMEM81	5.8122	8.7939	0.4747	1	NC	No	No	1	TMEM81_exon_chr1:205084460	1	1	0	NA	1
1497	RBBP5	29.8415	25.5221	-0.1432	1	NC	No	No	1	RBBP5_exon_chr1:205088815	1	1	0	NA	4	86.56	94.76	8.2	NA
1498	DSTYK	40.0202	39.7411	-0.0884	1	NC	No	No	1	DSTYK_exon_chr1:205147745	1	1	0	NA	4	86.92	82.74	-4.18	NA
1499	TMCC2	18.8917	23.9669	0.3189	1	NC	No	No	1	TMCC2_exon_chr1:205271812	1	1	0	NA	1
1500	NUAK2	15.7417	19.2611	0.2127	1	NC	No	No	1	NUAK2_exon_chr1:205304513	1	1	0	NA	2	87.82	88.41	0.59	NA
1501	LEMD1	5.8345	6.161	0.1553	1	NC	No	No	1	LEMD1_exon_chr1:205381856	1	1	0	NA	1
1502	CDK18	35.8614	37.9608	0.1209	1	NC	No	No	1	CDK18_exon_chr1:205531343	1	1	0	NA	1
1503	ELK4	137.782	149.304	0.135	0.786333	NC	No	No	2	ELK4_exon_chr1:205616644	0.7867	0.7443	-0.0425	NA	1
1504	ELK4									ELK4_exon_chr1:205620838	0.2133	0.2557	0.0425	NA	1
1505	SLC45A3	23.9647	29.7535	0.2464	1	NC	No	No	1	SLC45A3_exon_chr1:205659671	1	1	0	NA	1
1506	NUCKS1	7490.2	6435.8	-0.221	0.00327509	NC	No	No	3	NUCKS1_exon_chr1:205718479	0.1328	0.1626	0.0298	NA	19	88.47	91.64	3.17	NA
1507	NUCKS1									NUCKS1_exon_chr1:205719726	0.8085	0.7659	-0.0426	NA	2	82.97	83.56	0.6	NA
1508	NUCKS1									NUCKS1_exon_chr1:205720653	0.0577	0.0709	0.0132	NA	1
1509	RAB29	96.4367	95.1593	-0.0072	1	NC	No	No	1	RAB29_exon_chr1:205770453	1	1	0	NA	1
1510	SLC41A1	42.3311	40.7838	0.0096	1	NC	No	No	1	SLC41A1_exon_chr1:205791718	1	1	0	NA	1
1511	FAM72A	123.329	138.357	0.2029	0.742799	NC	No	No	1	FAM72A_exon_chr1:206187373	1	1	0	NA	5	66.34	66.57	0.24	NA
1512	SRGAP2	175.633	158.638	-0.1408	0.740144	NC	No	No	3	SRGAP2_exon_chr1:206406376	0.083	0.098	0.0151	NA	3	28.58	24.26	-4.32	NA
1513	SRGAP2									SRGAP2_exon_chr1:206453660	0.166	0.1589	-0.0071	NA	1
1514	SRGAP2									SRGAP2_exon_chr1:206461036	0.7511	0.7431	-0.008	NA	1
1515	IKBKE	19.3283	18.6424	-0.0119	1	NC	No	No	2	IKBKE_exon_chr1:206474802	0.3054	0.2418	-0.0636	NA	1
1516	IKBKE									IKBKE_exon_chr1:206496111	0.6946	0.7582	0.0636	NA	1
1517	RASSF5	17.5673	14.9593	-0.2078	1	NC	No	No	1	RASSF5_exon_chr1:206584386	1	1	0	NA	1
1518	EIF2D	223.571	204.734	-0.0946	0.81959	NC	No	No	2	EIF2D_exon_chr1:206591845	0.8796	0.8938	0.0142	NA	1
1519	EIF2D									EIF2D_exon_chr1:206595838	0.1204	0.1062	-0.0142	NA	2	42.66	47.95	5.29	NA
1520	DYRK3	65.3002	47.7438	-0.4593	1	NC	No	No	1	DYRK3_exon_chr1:206647387	1	1	0	NA	5	70.53	60.68	-9.86	NA
1521	MAPKAPK2	160.026	181.386	0.1545	0.745408	NC	No	No	1	MAPKAPK2_exon_chr1:206731805	1	1	0	NA	2	93.68	94.46	0.78	NA
1522	AC098935.1	42.3374	46.3701	0.0876	1	NC	No	No	1	AC098935.1_exon_chr1:206907618	1	1	0	NA	1
1523	C1orf116	9.7772	10.8551	0.2481	1	NC	No	No	1	C1orf116_exon_chr1:207023480	1	1	0	NA	5	47.91	36.54	-11.37	NA
1524	YOD1	78.2535	92.431	0.2091	1	NC	No	No	1	YOD1_exon_chr1:207049723	1	1	0	NA	8	93.86	94.47	0.61	NA
1525	PFKFB2	44.9816	35.4313	-0.2811	1	NC	No	No	1	PFKFB2_exon_chr1:207072203	1	1	0	NA	5	71.13	65.81	-5.32	NA
1526	AL445493.2	10.1149	6.9904	-0.5667	1	NC	No	No	1	AL445493.2_exon_chr1:207183661	1	1	0	NA	1
1527	CD55	127.179	130.348	0.0264	1	NC	No	No	1	CD55_exon_chr1:207359545	1	1	0	NA	8	88.66	95.18	6.53	NA
1528	CR2	10.1548	8.388	-0.3542	1	NC	No	No	1	CR2_exon_chr1:207489141	1	1	0	NA	1
1529	CD46	110.184	105.475	-0.0857	1	NC	No	No	1	CD46_exon_chr1:207793518	1	1	0	NA	6	89.28	91.42	2.15	NA
1530	ATP5MC2P1	8.3706	5.7818	-0.4411	1	NC	No	No	1	ATP5MC2P1_exon_chr1:209268223	1	1	0	NA	1
1531	LAMB3	539.747	656.768	0.2774	0.0350967	NC	No	No	1	LAMB3_exon_chr1:209615407	1	1	0	NA	1
1532	C1orf74	43.5977	44.2787	0.0295	1	NC	No	No	1	C1orf74_exon_chr1:209783709	1	1	0	NA	7	37.95	34.46	-3.49	NA
1533	IRF6	95.2307	62.2879	-0.5881	0.111402	NC	No	No	1	IRF6_exon_chr1:209788644	1	1	0	NA	6	92.74	92	-0.74	NA
1534	UTP25	59.5467	70.0084	0.2927	1	NC	No	No	1	UTP25_exon_chr1:209851203	1	1	0	NA	8	17.59	20.3	2.71	NA
1535	ST13P19	38.5615	22.4644	-0.73	1	NC	No	No	2	ST13P19_exon_chr1:210266182	0.9722	0.9056	-0.0666	NA	1
1536	ST13P19									ST13P19_exon_chr1:210267241	0.0278	0.0944	0.0666	NA	1
1537	RNU5A-8P	14.5667	5.5322	-1.088	1	NC	No	No	1	RNU5A-8P_exon_chr1:210374267	1	1	0	NA	3	89.03	65.52	-23.5	NA
1538	AC092017.1	6.5896	7.2293	0.1662	1	NC	No	No	1	AC092017.1_exon_chr1:211207238	1	1	0	NA	1
1539	RCOR3	78.7287	75.4813	-0.0986	1	NC	No	No	2	RCOR3_exon_chr1:211260928	0.1148	0.1527	0.0379	NA	1
1540	RCOR3									RCOR3_exon_chr1:211312719	0.8852	0.8473	-0.0379	NA	9	63.38	57	-6.38	NA
1541	TRAF5	24.7622	26.0228	0.0244	1	NC	No	No	1	TRAF5_exon_chr1:211372127	1	1	0	NA	8	73.89	74.14	0.25	NA
1542	LINC00467	108.79	110.937	-0.0202	1	NC	No	No	2	LINC00467_exon_chr1:211396766	0.2092	0.1785	-0.0307	NA	2	100	88.26	-11.74	NA
1543	LINC00467									LINC00467_exon_chr1:211432045	0.7875	0.8215	0.034	NA	3	31.65	33.61	1.96	NA
1544	SLC30A1	43.3768	45.261	0.0904	1	NC	No	No	1	SLC30A1_exon_chr1:211576289	1	1	0	NA	5	70.47	78.34	7.87	NA
1545	NEK2	36.7425	37.0119	0.0669	1	NC	No	No	1	NEK2_exon_chr1:211663652	1	1	0	NA	1
1546	LPGAT1	177.049	197.531	0.1875	0.514916	NC	No	No	1	LPGAT1_exon_chr1:211750050	1	1	0	NA	11	68.52	70.46	1.94	NA
1547	INTS7	163.603	162.654	-0.0081	1	NC	No	No	1	INTS7_exon_chr1:211942111	1	1	0	NA	3	73	79.65	6.65	NA
1548	RPL21P28	2434.36	2451.43	0.0077	0.918028	NC	No	No	1	RPL21P28_exon_chr1:212052006	1	1	0	NA	1
1549	DTL	53.0233	59.673	0.1798	1	NC	No	No	1	DTL_exon_chr1:212102841	1	1	0	NA	6	64.88	62.3	-2.58	NA
1550	LINC02608	6.1674	6.0931	-0.0815	1	NC	No	No	1	LINC02608_exon_chr1:212225513	1	1	0	NA	1
1551	PPP2R5A	337.54	358.892	0.1004	0.608513	NC	No	No	1	PPP2R5A_exon_chr1:212360637	1	1	0	NA	1
1552	PACC1	94.9795	99.0168	0.0573	1	NC	No	No	1	PACC1_exon_chr1:212365376	1	1	0	NA	4	84.29	78.64	-5.65	NA
1553	NENF	741.341	723.845	-0.0442	0.741624	NC	No	No	1	NENF_exon_chr1:212445829	1	1	0	NA	2	15.13	14.86	-0.27	NA
1554	ATF3	48.8573	52.0009	0.094	1	NC	No	No	1	ATF3_exon_chr1:212618126	1	1	0	NA	2	95.28	93.29	-1.99	NA
1555	BATF3	17.8404	29.9274	0.7223	1	NC	No	No	1	BATF3_exon_chr1:212686979	1	1	0	NA	2	42.22	38.27	-3.95	NA
1556	NSL1	86.4216	86.0674	-0.01	1	NC	No	No	1	NSL1_exon_chr1:212738686	1	1	0	NA	11	11.43	15.08	3.65	NA
1557	TATDN3	82.2966	66.6751	-0.2947	0.843891	NC	No	No	1	TATDN3_exon_chr1:212815012	1	1	0	NA	5	36.81	35.64	-1.17	NA
1558	FLVCR1	71.0414	74.5678	0.0569	1	NC	No	No	1	FLVCR1_exon_chr1:212895215	1	1	0	NA	4	46.4	45.38	-1.02	NA
1559	VASH2	16.3109	20.0638	0.2288	1	NC	No	No	1	VASH2_exon_chr1:212988511	1	1	0	NA	1
1560	ANGEL2	71.5502	55.3859	-0.3451	0.696963	NC	No	No	2	ANGEL2_exon_chr1:212995192	0.834	0.811	-0.023	NA	3	90.6	90.15	-0.45	NA
1561	ANGEL2									ANGEL2_exon_chr1:213007198	0.166	0.189	0.023	NA	2	32.87	32.04	-0.83	NA
1562	RPS6KC1	155.518	163.018	0.0705	0.980097	NC	No	No	1	RPS6KC1_exon_chr1:213272523	1	1	0	NA	4	5.44	10.33	4.9	NA
1563	SMYD2	123.143	119.773	-0.0409	1	NC	No	No	1	SMYD2_exon_chr1:214336698	1	1	0	NA	1
1564	AL929236.1	34.2017	33.8036	0.0783	1	NC	No	No	1	AL929236.1_exon_chr1:214358050	1	1	0	NA	5	88.64	94.4	5.76	NA
1565	ABHD17AP3	5.1009	8.7288	0.7388	1	NC	No	No	1	ABHD17AP3_exon_chr1:214606079	1	1	0	NA	1
1566	CENPF	2403.48	2269.96	-0.0873	0.488317	NC	No	No	7	CENPF_exon_chr1:214613713	0.1341	0.1435	0.0095	NA	4	93.1	94.23	1.13	NA
1567	CENPF									CENPF_exon_chr1:214614831	0.1398	0.136	-0.0038	NA	2	74.4	69.64	-4.76	NA
1568	CENPF									CENPF_exon_chr1:214619128	0.0603	0.0643	0.0041	NA	1
1569	CENPF									CENPF_exon_chr1:214622078	0.0761	0.0743	-0.0017	NA	2	86.69	88.55	1.86	NA
1570	CENPF									CENPF_exon_chr1:214639920	0.3088	0.3004	-0.0085	NA	9	52.88	52.48	-0.4	NA
1571	CENPF									CENPF_exon_chr1:214644556	0.1215	0.1255	0.0041	NA	12	60.06	66.88	6.81	NA
1572	CENPF									CENPF_exon_chr1:214663590	0.0836	0.0869	0.0033	NA	5	17.05	16.55	-0.5	NA
1573	KCTD3	271.749	285.911	0.1026	0.681914	NC	No	No	1	KCTD3_exon_chr1:215620056	1	1	0	NA	5	55.46	59.77	4.3	NA
1574	GPATCH2	32.6252	28.5581	-0.2601	1	NC	No	No	2	GPATCH2_exon_chr1:217431365	0.7761	0.8247	0.0486	NA	4	61.45	75.18	13.74	NA
1575	GPATCH2									GPATCH2_exon_chr1:217610192	0.2239	0.1753	-0.0486	NA	2	49.33	87.82	38.49	NA
1576	SPATA17	8.6676	6.7515	-0.4515	1	NC	No	No	1	SPATA17_exon_chr1:217866877	1	1	0	NA	2	14.58	27.84	13.26	NA
1577	RRP15	611.03	650.598	0.0829	0.61573	NC	No	No	3	RRP15_exon_chr1:218285292	0.0789	0.0526	-0.0263	NA	1
1578	RRP15									RRP15_exon_chr1:218302293	0.6496	0.6368	-0.0128	NA	2	93.5	90.85	-2.65	NA
1579	RRP15									RRP15_exon_chr1:218330947	0.2715	0.3106	0.0391	NA	6	70.78	72.27	1.49	NA
1580	LYPLAL1	190.414	171.285	-0.1321	0.73623	NC	No	No	1	LYPLAL1_exon_chr1:219211491	1	1	0	NA	2	9.26	5.4	-3.86	NA
1581	EPRS	492.098	424.019	-0.22	0.14018	NC	No	No	2	EPRS_exon_chr1:219968956	0.8158	0.8268	0.011	NA	1
1582	EPRS									EPRS_exon_chr1:219984258	0.0666	0.0661	-0.0005	NA	1
1583	BPNT1	51.6477	37.8321	-0.3856	0.76353	NC	No	No	1	BPNT1_exon_chr1:220058992	1	1	0	NA	4	35.98	44.69	8.72	NA
1584	IARS2	514.584	592.653	0.2116	0.160713	NC	No	No	1	IARS2_exon_chr1:220147492	1	1	0	NA	1
1585	RPS15AP12	97.3007	95.29	-0.02	1	NC	No	No	1	RPS15AP12_exon_chr1:220144351	1	1	0	NA	1
1586	RAB3GAP2	16.7452	13.5482	-0.2553	1	NC	No	No	1	RAB3GAP2_exon_chr1:220151764	1	1	0	NA	3	19.12	60.18	41.06	NA
1587	MARK1	12.6901	15.5716	0.3222	1	NC	No	No	1	MARK1_exon_chr1:220661811	1	1	0	NA	4	19.44	23.35	3.91	NA
1588	C1orf115	23.6486	25.093	0.0406	1	NC	No	No	1	C1orf115_exon_chr1:220696611	1	1	0	NA	1
1589	2020-03-02	25.4144	25.4041	0.0432	1	NC	No	No	1	MARC2_exon_chr1:220783918	1	1	0	NA	2	63.06	46.49	-16.57	NA
1590	2020-03-01	69.4363	60.9806	-0.1676	1	NC	No	No	1	MARC1_exon_chr1:220813291	1	1	0	NA	1
1591	TAF1A	31.7525	25.7009	-0.3751	1	NC	No	No	1	TAF1A_exon_chr1:222558772	1	1	0	NA	1
1592	MIA3	83.2344	72.3328	-0.2075	1	NC	No	No	2	MIA3_exon_chr1:222627574	0.3129	0.298	-0.0149	NA	3	29.6	49.52	19.92	NA
1593	MIA3									MIA3_exon_chr1:222664882	0.5946	0.6007	0.0061	NA	9	26.68	21.49	-5.19	NA
1594	AL592148.3	18.5493	17.5538	-0.1435	1	NC	No	No	1	AL592148.3_exon_chr1:222661512	1	1	0	NA	5	41.76	52.04	10.28	NA
1595	AIDA	277.791	299.258	0.0963	0.773311	NC	No	No	1	AIDA_exon_chr1:222670250	1	1	0	NA	6	88.57	87.86	-0.7	NA
1596	BROX	131.839	135.948	0.0357	1	NC	No	No	2	BROX_exon_chr1:222713587	0.2739	0.1906	-0.0833	NA	1
1597	BROX									BROX_exon_chr1:222732627	0.7261	0.8094	0.0833	NA	1
1598	AL392172.1	13.3615	17.4577	0.3402	1	NC	No	No	1	AL392172.1_exon_chr1:222836922	1	1	0	NA	1
1599	DISP1	14.8374	18.1084	0.2472	1	NC	No	No	1	DISP1_exon_chr1:223002384	1	1	0	NA	1
1600	CAPN2	667.476	826.541	0.3006	0.0030556	NC	No	No	1	CAPN2_exon_chr1:223774833	1	1	0	NA	11	22.78	23.46	0.69	NA
1601	TP53BP2	59.786	65.1506	0.0997	1	NC	No	No	2	TP53BP2_exon_chr1:223780894	0.8767	0.8468	-0.0299	NA	2	19.71	32.16	12.45	NA
1602	TP53BP2									TP53BP2_exon_chr1:223804348	0.099	0.1403	0.0413	NA	2	75	51.71	-23.29	NA
1603	GTF2IP20	17.8595	14.583	-0.3848	1	NC	No	No	1	GTF2IP20_exon_chr1:223953439	1	1	0	NA	2	28.7	43.36	14.66	NA
1604	FBXO28	119.45	139.43	0.2489	0.465711	NC	No	No	1	FBXO28_exon_chr1:224157351	1	1	0	NA	10	78.51	70.13	-8.38	NA
1605	AC092809.3	10.6432	11.7026	-0.0065	1	NC	No	No	1	AC092809.3_exon_chr1:224175706	1	1	0	NA	1
1606	DEGS1	293.931	325.501	0.154	0.426159	NC	No	No	1	DEGS1_exon_chr1:224192331	1	1	0	NA	4	27.57	25.87	-1.7	NA
1607	NVL	57.3475	44.4141	-0.3318	0.903364	NC	No	No	3	NVL_exon_chr1:224227670	0.5017	0.5317	0.03	NA	1
1608	NVL									NVL_exon_chr1:224305166	0.3794	0.3523	-0.0271	NA	1
1609	NVL									NVL_exon_chr1:224317930	0.0939	0.1075	0.0136	NA	1
1610	CNIH4	250.16	278.719	0.1754	0.532613	NC	No	No	1	CNIH4_exon_chr1:224375794	1	1	0	NA	3	10.71	7.8	-2.91	NA
1611	WDR26	138.612	140.774	0.0567	1	NC	No	No	1	WDR26_exon_chr1:224389860	1	1	0	NA	10	15.03	11.69	-3.34	NA
1612	DNAH14	52.9674	49.4233	-0.0206	1	NC	No	No	5	DNAH14_exon_chr1:224952669	0.1354	0.1402	0.0048	NA	1
1613	DNAH14									DNAH14_exon_chr1:224954958	0.1233	0.1212	-0.0022	NA	1
1614	DNAH14									DNAH14_exon_chr1:224967430	0.5286	0.5737	0.0451	NA	3	48.03	43.88	-4.15	NA
1615	DNAH14									DNAH14_exon_chr1:224968758	0.0689	0.0911	0.0222	NA	1
1616	DNAH14									DNAH14_exon_chr1:225399053	0.1437	0.0623	-0.0815	NA	1
1617	LBR	328.438	372.243	0.1983	0.302177	NC	No	No	1	LBR_exon_chr1:225403463	1	1	0	NA	1
1618	ENAH	402.529	391.401	-0.036	1	NC	No	No	3	ENAH_exon_chr1:225497812	0.6647	0.7305	0.0658	NA	20	54.22	46.92	-7.29	NA
1619	ENAH									ENAH_exon_chr1:225498404	0.1652	0.1288	-0.0364	NA	1
1620	ENAH									ENAH_exon_chr1:225512714	0.1085	0.0816	-0.0269	NA	1
1621	SRP9	1669.04	1574.05	-0.0851	0.412023	NC	No	No	1	SRP9_exon_chr1:225789033	1	1	0	NA	1
1622	AL591895.1	42.8023	51.5754	0.3341	0.991105	NC	No	No	2	AL591895.1_exon_chr1:225841187	0.3233	0.3986	0.0753	NA	2	87.59	97.23	9.65	NA
1623	AL591895.1									AL591895.1_exon_chr1:225847465	0.6767	0.6014	-0.0753	NA	2	74.21	58.67	-15.54	NA
1624	EPHX1	62.8817	68.545	0.1409	1	NC	No	No	1	EPHX1_exon_chr1:225845145	1	1	0	NA	1
1625	PYCR2	273.118	274.685	-0.0043	1	NC	No	No	1	PYCR2_exon_chr1:225920620	1	1	0	NA	1
1626	SDE2	71.7731	89.5684	0.2907	0.783633	NC	No	No	2	SDE2_exon_chr1:225985523	0.8889	0.8747	-0.0142	NA	5	95.21	92.43	-2.78	NA
1627	SDE2									SDE2_exon_chr1:225988388	0.1111	0.1253	0.0142	NA	1
1628	H3F3A	1599.47	1526.46	-0.0617	0.493105	NC	No	No	1	H3F3A_exon_chr1:226071350	1	1	0	NA	4	47.31	48.76	1.45	NA
1629	ACBD3	273.244	242.27	-0.1714	0.495134	NC	No	No	3	ACBD3_exon_chr1:226146821	0.3294	0.3522	0.0228	NA	6	77.78	72.87	-4.91	NA
1630	ACBD3									ACBD3_exon_chr1:226161689	0.1452	0.1875	0.0423	NA	1
1631	ACBD3									ACBD3_exon_chr1:226164929	0.5134	0.4472	-0.0662	NA	1
1632	LIN9	19.5998	20.5356	0.1558	1	NC	No	No	2	LIN9_exon_chr1:226233193	0.8184	0.8825	0.0641	NA	2	91.76	89.22	-2.54	NA
1633	LIN9									LIN9_exon_chr1:226250919	0.1816	0.1175	-0.0641	NA	1
1634	PARP1	841.991	830.129	-0.0343	0.761312	NC	No	No	1	PARP1_exon_chr1:226362252	1	1	0	NA	7	21.2	19.81	-1.38	NA
1635	CDKN2AIPNLP1	6.9688	6.2451	-0.2357	1	NC	No	No	1	CDKN2AIPNLP1_exon_chr1:226493489	1	1	0	NA	1
1636	ITPKB	17.4381	20.1477	0.2207	1	NC	No	No	2	ITPKB_exon_chr1:226634886	0.9348	0.9511	0.0163	NA	1
1637	ITPKB									ITPKB_exon_chr1:226707915	0.0652	0.0489	-0.0163	NA	1
1638	PSEN2	53.65	67.896	0.3013	1	NC	No	No	1	PSEN2_exon_chr1:226895423	1	1	0	NA	2	94.1	94.47	0.37	NA
1639	COQ8A	139.776	137.979	-0.0329	1	NC	No	No	1	COQ8A_exon_chr1:226986452	1	1	0	NA	1
1640	CDC42BPA	318.558	315.135	-0.041	0.85692	NC	No	No	2	CDC42BPA_exon_chr1:226994399	0.6623	0.6915	0.0292	NA	6	61.71	64.54	2.82	NA
1641	CDC42BPA									CDC42BPA_exon_chr1:227119937	0.2876	0.2585	-0.0291	NA	1
1642	AL606462.1	143.199	147.372	0.0223	1	NC	No	No	1	AL606462.1_exon_chr1:227429404	1	1	0	NA	1
1643	AL592310.1	11.246	8.7405	-0.3799	1	NC	No	No	1	AL592310.1_exon_chr1:227599094	1	1	0	NA	1
1644	ZNF678	13.873	13.3243	-0.0928	1	NC	No	No	1	ZNF678_exon_chr1:227654335	1	1	0	NA	4	82.02	70.71	-11.31	NA
1645	JMJD4	66.6159	66.6606	-0.0177	1	NC	No	No	1	JMJD4_exon_chr1:227732676	1	1	0	NA	6	75.06	66.06	-9.01	NA
1646	SNAP47	94.9536	83.3141	-0.2014	1	NC	No	No	1	SNAP47_exon_chr1:227780526	1	1	0	NA	1
1647	WNT9A	27.2368	33.4347	0.3494	1	NC	No	No	1	WNT9A_exon_chr1:227922000	1	1	0	NA	1
1648	WNT3A	9.0189	13.2005	0.4368	1	NC	No	No	1	WNT3A_exon_chr1:228058985	1	1	0	NA	2	38.5	32.47	-6.03	NA
1649	ARF1	1377.16	1680.09	0.2895	0.000118294	NC	No	No	1	ARF1_exon_chr1:228097077	1	1	0	NA	5	90.14	91.03	0.89	NA
1650	C1orf35	151.892	157.835	0.0977	0.930749	NC	No	No	1	C1orf35_exon_chr1:228102688	1	1	0	NA	2	89.6	89.29	-0.31	NA
1651	MRPL55	366.517	347.182	-0.0745	0.816295	NC	No	No	1	MRPL55_exon_chr1:228106918	1	1	0	NA	1
1652	GUK1	672.337	782.235	0.2131	0.0602589	NC	No	No	1	GUK1_exon_chr1:228148090	1	1	0	NA	1
1653	GJC2	6.1036	5.3758	-0.0256	1	NC	No	No	1	GJC2_exon_chr1:228157739	1	1	0	NA	1
1654	IBA57	26.2843	36.5594	0.4412	1	NC	No	No	1	IBA57_exon_chr1:228175121	1	1	0	NA	4	27.39	32.67	5.28	NA
1655	OBSCN	46.8837	42.7466	-0.1063	1	NC	No	No	5	OBSCN_exon_chr1:228217394	0.3641	0.3328	-0.0313	NA	3	87.28	90.79	3.5	NA
1656	OBSCN									OBSCN_exon_chr1:228288060	0.1471	0.2333	0.0862	NA	1
1657	OBSCN									OBSCN_exon_chr1:228304302	0.1082	0.0703	-0.0379	NA	1
1658	OBSCN									OBSCN_exon_chr1:228359596	0.2323	0.2462	0.0139	NA	1
1659	OBSCN									OBSCN_exon_chr1:228378617	0.1244	0.0826	-0.0418	NA	1
1660	TRIM11	52.9618	63.2608	0.1926	1	NC	No	No	1	TRIM11_exon_chr1:228395252	1	1	0	NA	1
1661	HIST3H2A	21.4255	20.8786	-0.1019	1	NC	No	No	1	HIST3H2A_exon_chr1:228457873	1	1	0	NA	1
1662	RNF187	548.39	442.658	-0.3089	0.0141614	NC	No	No	1	RNF187_exon_chr1:228493882	1	1	0	NA	1
1663	RHOU	7.6378	11.5991	0.5358	1	NC	No	No	1	RHOU_exon_chr1:228743284	1	1	0	NA	2	78.6	58.65	-19.95	NA
1664	RAB4A	378.667	361.095	-0.0447	1	NC	No	No	1	RAB4A_exon_chr1:229303805	1	1	0	NA	7	48.06	53.74	5.68	NA
1665	CCSAP	119.161	115.53	-0.0381	1	NC	No	No	1	CCSAP_exon_chr1:229325411	1	1	0	NA	5	89.59	87.37	-2.23	NA
1666	AL160004.1	244.073	238.422	-0.0121	1	NC	No	No	1	AL160004.1_exon_chr1:229442040	1	1	0	NA	6	91.81	89.96	-1.84	NA
1667	ABCB10	68.723	74.786	0.0871	1	NC	No	No	1	ABCB10_exon_chr1:229518410	1	1	0	NA	3	79.99	82.34	2.34	NA
1668	TAF5L	148.971	154.589	0.0721	1	NC	No	No	2	TAF5L_exon_chr1:229595094	0.8883	0.8519	-0.0364	NA	2	90.15	93.26	3.1	NA
1669	TAF5L									TAF5L_exon_chr1:229602919	0.1117	0.1481	0.0364	NA	1
1670	URB2	77.098	68.6878	-0.133	1	NC	No	No	1	URB2_exon_chr1:229659099	1	1	0	NA	5	58.49	63.31	4.82	NA
1671	GALNT2	151.427	187.557	0.3063	0.230024	NC	No	No	2	GALNT2_exon_chr1:230178217	0.0649	0.0583	-0.0066	NA	1
1672	GALNT2									GALNT2_exon_chr1:230279302	0.9301	0.9399	0.0098	NA	4	72.55	74.99	2.44	NA
1673	COG2	96.3985	115.211	0.2454	0.751265	NC	No	No	1	COG2_exon_chr1:230693291	1	1	0	NA	3	79.23	82.05	2.82	NA
1674	C1orf198	40.6461	34.1199	-0.3168	1	NC	No	No	1	C1orf198_exon_chr1:230839908	1	1	0	NA	8	88.98	81.24	-7.74	NA
1675	TTC13	13.7877	11.3907	-0.1283	1	NC	No	No	1	TTC13_exon_chr1:230907019	1	1	0	NA	2	84.16	62.4	-21.76	NA
1676	ARV1	5.5215	5.0248	-0.1552	1	NC	No	No	1	ARV1_exon_chr1:231000137	1	1	0	NA	2	5.48	18.98	13.5	NA
1677	FAM89A	110.196	105.666	-0.0695	1	NC	No	No	1	FAM89A_exon_chr1:231020126	1	1	0	NA	4	90.79	93.4	2.6	NA
1678	C1orf131	284.86	246.741	-0.223	0.383851	NC	No	No	3	C1orf131_exon_chr1:231225922	0.336	0.3859	0.0499	NA	3	72.64	73.65	1.01	NA
1679	C1orf131									C1orf131_exon_chr1:231226825	0.2635	0.2882	0.0247	NA	1
1680	C1orf131									C1orf131_exon_chr1:231239188	0.3863	0.3129	-0.0734	NA	1
1681	GNPAT	299.778	242.87	-0.3295	0.114783	NC	No	No	1	GNPAT_exon_chr1:231277498	1	1	0	NA	1
1682	EXOC8	96.406	102.267	0.1213	0.924743	NC	No	No	1	EXOC8_exon_chr1:231337852	1	1	0	NA	1
1683	SPRTN	50.5545	49.9314	0.0033	1	NC	No	No	1	SPRTN_exon_chr1:231351303	1	1	0	NA	10	63.35	67.14	3.79	NA
1684	AL445524.2	175.346	150.236	-0.2463	0.363856	NC	No	No	1	AL445524.2_exon_chr1:231366475	1	1	0	NA	6	84.07	86.67	2.6	NA
1685	AL445524.1	255.057	310.66	0.2719	0.106619	NC	No	No	1	AL445524.1_exon_chr1:231522790	1	1	0	NA	1
1686	TSNAX	192.263	229.249	0.2503	0.288453	NC	No	No	2	TSNAX_exon_chr1:231561127	0.0766	0.0383	-0.0383	NA	1
1687	TSNAX									TSNAX_exon_chr1:231564527	0.9234	0.9617	0.0383	NA	1
1688	SIPA1L2	21.4677	22.512	0.0816	1	NC	No	No	1	SIPA1L2_exon_chr1:232399273	1	1	0	NA	2	76.48	72.44	-4.04	NA
1689	NTPCR	110.641	114.023	0.0788	1	NC	No	No	2	NTPCR_exon_chr1:232976301	0.137	0.1818	0.0448	NA	1
1690	NTPCR									NTPCR_exon_chr1:232978162	0.863	0.8182	-0.0448	NA	8	33.49	36.15	2.66	NA
1691	PCNX2	30.8004	32.1159	0.0043	1	NC	No	No	3	PCNX2_exon_chr1:232986540	0.7899	0.7653	-0.0245	NA	1
1692	PCNX2									PCNX2_exon_chr1:233065661	0.0469	0.0646	0.0177	NA	1
1693	PCNX2									PCNX2_exon_chr1:233095863	0.1276	0.1267	-0.0009	NA	2	1.61	14.73	13.12	NA
1694	RPS7P3	11.5621	12.9344	0.2399	1	NC	No	No	1	RPS7P3_exon_chr1:233289447	1	1	0	NA	1
1695	MAP3K21	39.8663	44.9532	0.1252	1	NC	No	No	2	MAP3K21_exon_chr1:233375782	0.1731	0.1788	0.0056	NA	1
1696	MAP3K21									MAP3K21_exon_chr1:233382304	0.8269	0.8212	-0.0056	NA	5	43.38	50.43	7.05	NA
1697	KCNK1	122.038	147.091	0.2952	0.508153	NC	No	No	1	KCNK1_exon_chr1:233671270	1	1	0	NA	5	23.84	28.01	4.17	NA
1698	SLC35F3	87.3891	99.5195	0.1936	1	NC	No	No	2	SLC35F3_exon_chr1:234309100	0.4798	0.5722	0.0924	NA	1
1699	SLC35F3									SLC35F3_exon_chr1:234323007	0.5202	0.4278	-0.0924	NA	1
1700	COA6-AS1	14.9004	18.0021	0.2063	1	NC	No	No	1	COA6-AS1_exon_chr1:234373210	1	1	0	NA	2	23.47	12.07	-11.41	NA
1701	COA6	343.794	298.186	-0.1986	0.781994	NC	No	No	1	COA6_exon_chr1:234383722	1	1	0	NA	1
1702	IRF2BP2	73.3105	85.389	0.1961	1	NC	No	No	1	IRF2BP2_exon_chr1:234607852	1	1	0	NA	8	48.35	47.16	-1.2	NA
1703	TOMM20	1223.79	1100.17	-0.1519	0.125704	NC	No	No	1	TOMM20_exon_chr1:235112108	1	1	0	NA	9	74.64	70.39	-4.26	NA
1704	ARID4B	966.387	1038.94	0.1024	0.451119	NC	No	No	5	ARID4B_exon_chr1:235131997	0.2492	0.2596	0.0104	NA	1
1705	ARID4B									ARID4B_exon_chr1:235177913	0.1567	0.1271	-0.0296	NA	3	67.26	68.59	1.32	NA
1706	ARID4B									ARID4B_exon_chr1:235182793	0.0959	0.1014	0.0054	NA	5	19.39	22.08	2.7	NA
1707	ARID4B									ARID4B_exon_chr1:235214026	0.2364	0.2198	-0.0167	NA	3	51.38	52.84	1.46	NA
1708	ARID4B									ARID4B_exon_chr1:235229385	0.0987	0.1246	0.0259	NA	3	20.74	26.29	5.55	NA
1709	RBM34	138.26	100.591	-0.4634	0.115016	NC	No	No	2	RBM34_exon_chr1:235155112	0.8656	0.8586	-0.007	NA	1
1710	RBM34									RBM34_exon_chr1:235161171	0.1344	0.1414	0.007	NA	4	60.3	59.09	-1.22	NA
1711	GGPS1	64.048	85.0444	0.3488	0.809086	NC	No	No	1	GGPS1_exon_chr1:235342010	1	1	0	NA	6	40.89	38.38	-2.51	NA
1712	B3GALNT2	65.4379	68.0125	0.045	1	NC	No	No	1	B3GALNT2_exon_chr1:235450340	1	1	0	NA	6	91.94	94.52	2.59	NA
1713	TBCE	109.612	108.174	-0.0429	1	NC	No	No	1	TBCE_exon_chr1:235448348	1	1	0	NA	2	92.42	90.15	-2.27	NA
1714	GNG4	39.1143	42.9148	0.109	1	NC	No	No	1	GNG4_exon_chr1:235552237	1	1	0	NA	1
1715	LYST	8.9511	11.7967	0.4669	1	NC	No	No	2	LYST_exon_chr1:235663078	0.5982	0.5759	-0.0223	NA	1
1716	LYST									LYST_exon_chr1:235829036	0.4018	0.4241	0.0223	NA	1
1717	GPR137B	20.778	42.2413	0.9413	1	NC	No	No	1	GPR137B_exon_chr1:236208049	1	1	0	NA	4	50.87	62.13	11.26	NA
1718	ERO1B	13.853	17.3309	0.3075	1	NC	No	No	1	ERO1B_exon_chr1:236218576	1	1	0	NA	7	74.2	58.87	-15.32	NA
1719	AL359921.2	20.4427	23.6716	0.2725	1	NC	No	No	1	AL359921.2_exon_chr1:236536704	1	1	0	NA	1
1720	AL359921.1	184.484	179.621	-0.038	1	NC	No	No	1	AL359921.1_exon_chr1:236550990	1	1	0	NA	1
1721	LGALS8	80.8111	84.038	0.0833	1	NC	No	No	1	LGALS8_exon_chr1:236548011	1	1	0	NA	7	49.23	40	-9.23	NA
1722	HEATR1	31.6648	20.5755	-0.5673	1	NC	No	No	3	HEATR1_exon_chr1:236558529	0.1458	0.152	0.0062	NA	1
1723	HEATR1									HEATR1_exon_chr1:236572828	0.6105	0.5238	-0.0867	NA	1
1724	HEATR1									HEATR1_exon_chr1:236596044	0.2316	0.2724	0.0408	NA	1
1725	MTR	57.4144	51.6945	-0.0873	1	NC	No	No	1	MTR_exon_chr1:236897557	1	1	0	NA	6	36.63	48.71	12.08	NA
1726	FH	620.642	640.37	0.0406	0.712265	NC	No	No	1	FH_exon_chr1:241497970	1	1	0	NA	2	26.17	23.19	-2.98	NA
1727	CHML	54.9139	45.5325	-0.2479	1	NC	No	No	1	CHML_exon_chr1:241636073	1	1	0	NA	3	73.1	78.8	5.7	NA
1728	EXO1	79.4407	69.7791	-0.2188	1	NC	No	No	1	EXO1_exon_chr1:241889464	1	1	0	NA	7	20.68	16.02	-4.65	NA
1729	CEP170	84.2953	90.8013	0.0946	1	NC	No	No	3	CEP170_exon_chr1:243126738	0.4358	0.478	0.0421	NA	3	92.85	92.19	-0.66	NA
1730	CEP170									CEP170_exon_chr1:243166116	0.0812	0.0294	-0.0518	NA	1
1731	CEP170									CEP170_exon_chr1:KI270763v1	0.4274	0.4572	0.0299	NA	5	92.6	92.53	-0.07	NA
1732	SDCCAG8	264.516	208.225	-0.3491	0.137704	NC	No	No	2	SDCCAG8_exon_chr1:243499755	0.4322	0.4163	-0.0158	NA	1
1733	SDCCAG8									SDCCAG8_exon_chr1:KI270763v1	0.4876	0.4932	0.0057	NA	7	93.48	92.67	-0.81	NA
1734	ZBTB18	16.7659	23.1584	0.4418	1	NC	No	No	1	ZBTB18_exon_chr1:244053787	1	1	0	NA	1
1735	ADSS	215.118	211.968	-0.0247	1	NC	No	No	2	ADSS_exon_chr1:244409638	0.9381	0.9613	0.0232	NA	4	73.12	77.71	4.6	NA
1736	ADSS									ADSS_exon_chr1:244436893	0.0619	0.0387	-0.0232	NA	1
1737	DESI2	238.657	240.376	0.0003	1	NC	No	No	1	DESI2_exon_chr1:244705555	1	1	0	NA	1
1738	HNRNPU	1388.74	1554.73	0.1557	0.0904756	NC	No	No	3	HNRNPU_exon_chr1:244856625	0.7278	0.6851	-0.0427	NA	19	65.89	61.99	-3.9	NA
1739	HNRNPU									HNRNPU_exon_chr1:244863106	0.1226	0.1447	0.0221	NA	1
1740	HNRNPU									HNRNPU_exon_chr1:244864560	0.1247	0.1502	0.0256	NA	3	90.24	94.32	4.08	NA
1741	COX20	1429.67	1541.96	0.1145	0.225202	NC	No	No	1	COX20_exon_chr1:244843040	1	1	0	NA	10	15.41	16.4	0.99	NA
1742	EFCAB2	37.8784	26.518	-0.3982	1	NC	No	No	3	EFCAB2_exon_chr1:245087244	0.8075	0.7933	-0.0142	NA	5	86.88	89.9	3.02	NA
1743	EFCAB2									EFCAB2_exon_chr1:245091026	0.0582	0.0412	-0.017	NA	1
1744	EFCAB2									EFCAB2_exon_chr1:245121919	0.1343	0.1655	0.0312	NA	2	16.41	23.82	7.4	NA
1745	SMYD3	151.567	106.973	-0.5198	0.0487137	DOWN	No	No	1	SMYD3_exon_chr1:245749664	1	1	0	NA	1
1746	TFB2M	68.029	57.9288	-0.2194	1	NC	No	No	1	TFB2M_exon_chr1:246541202	1	1	0	NA	2	91	92.9	1.9	NA
1747	CNST	17.3871	25.3779	0.5072	1	NC	No	No	2	CNST_exon_chr1:246647138	0.0413	0.1538	0.1125	NA	3	64.92	70.29	5.37	NA
1748	CNST									CNST_exon_chr1:246665699	0.9587	0.8462	-0.1125	NA	1
1749	AHCTF1	349.869	378.196	0.104	0.726227	NC	No	No	3	AHCTF1_exon_chr1:246840998	0.408	0.4219	0.0139	NA	8	32.51	32.81	0.29	NA
1750	AHCTF1									AHCTF1_exon_chr1:246842776	0.3457	0.3057	-0.04	NA	1
1751	AHCTF1									AHCTF1_exon_chr1:246851442	0.2463	0.2724	0.0261	NA	5	78.22	71.33	-6.89	NA
1752	ZNF670-ZNF695	10.9107	16.7977	0.6345	1	NC	No	No	2	ZNF670-ZNF695_exon_chr1:246945827	0.274	0.2957	0.0217	NA	2	83.7	56.53	-27.17	NA
1753	ZNF670-ZNF695									ZNF670-ZNF695_exon_chr1:246969678	0.726	0.7043	-0.0217	NA	1
1754	ZNF695	7.2188	7.2118	-0.033	1	NC	No	No	1	ZNF695_exon_chr1:246988255	1	1	0	NA	5	63.59	40.71	-22.88	NA
1755	ZNF670	28.498	15.6969	-0.8002	1	NC	No	No	1	ZNF670_exon_chr1:247038427	1	1	0	NA	3	29.47	27.44	-2.03	NA
1756	ZNF669	21.5754	15.9877	-0.3655	1	NC	No	No	1	ZNF669_exon_chr1:247101319	1	1	0	NA	4	43.84	64.51	20.66	NA
1757	ZNF124	7.2387	8.3394	0.0326	1	NC	No	No	2	ZNF124_exon_chr1:247123871	0.2498	0.0137	-0.2361	NA	1
1758	ZNF124									ZNF124_exon_chr1:247157403	0.7502	0.9863	0.2361	NA	1
1759	AL390728.6	12.3811	9.0842	-0.2703	1	NC	No	No	1	AL390728.6_exon_chr1:247188526	1	1	0	NA	5	76.87	78.31	1.44	NA
1760	ZNF496	94.6948	105.208	0.1379	1	NC	No	No	1	ZNF496_exon_chr1:247301276	1	1	0	NA	5	72.02	71.23	-0.8	NA
1761	SH3BP5L	231.141	246.561	0.089	0.905892	NC	No	No	1	SH3BP5L_exon_chr1:248812370	1	1	0	NA	1
1762	ZNF672	198.272	205.001	0.0169	1	NC	No	No	1	ZNF672_exon_chr1:248847051	1	1	0	NA	1
1763	ZNF692	267.384	278.302	0.0665	0.878778	NC	No	No	1	ZNF692_exon_chr1:248850516	1	1	0	NA	1
1764	PGBD2	7.2411	7.4891	0.0423	1	NC	No	No	1	PGBD2_exon_chr1:248916601	1	1	0	NA	4	88.93	74.25	-14.68	NA
1765	RPL23AP25	40.8255	52.3272	0.3355	1	NC	No	No	1	RPL23AP25_exon_chr1:248936580	1	1	0	NA	1
1766	ZMYND11	94.7598	87.999	-0.1011	1	NC	No	No	2	ZMYND11_exon_chr10:209888	0.0884	0.0728	-0.0155	NA	1
1767	ZMYND11									ZMYND11_exon_chr10:252347	0.8919	0.9104	0.0185	NA	5	91.36	91.36	0	NA
1768	DIP2C	32.8645	23.9639	-0.415	1	NC	No	No	1	DIP2C_exon_chr10:277577	1	1	0	NA	4	71.3	72.28	0.98	NA
1769	LARP4B	206.997	227.036	0.1211	0.751265	NC	No	No	1	LARP4B_exon_chr10:813213	1	1	0	NA	9	53.61	53.87	0.26	NA
1770	GTPBP4	533.01	454.075	-0.2371	0.232999	NC	No	No	3	GTPBP4_exon_chr10:1010419	0.2056	0.2112	0.0056	NA	1
1771	GTPBP4									GTPBP4_exon_chr10:1012399	0.3111	0.293	-0.0181	NA	3	51.75	45.48	-6.27	NA
1772	GTPBP4									GTPBP4_exon_chr10:1017074	0.4567	0.4712	0.0146	NA	10	35.04	31.16	-3.88	NA
1773	IDI1	317.874	298.121	-0.074	0.761636	NC	No	No	2	IDI1_exon_chr10:1041504	0.8923	0.9153	0.023	NA	9	89.94	90.22	0.28	NA
1774	IDI1									IDI1_exon_chr10:1042762	0.1077	0.0847	-0.023	NA	1
1775	IDI2-AS1	5.8784	6.1669	0.1678	1	NC	No	No	1	IDI2-AS1_exon_chr10:1043528	1	1	0	NA	1
1776	WDR37	15.9709	22.1324	0.4664	1	NC	No	No	1	WDR37_exon_chr10:1129212	1	1	0	NA	3	86.78	71.39	-15.38	NA
1777	PFKP	666.325	609.858	-0.1148	0.448626	NC	No	No	1	PFKP_exon_chr10:3136449	1	1	0	NA	1
1778	PITRM1	150.839	143.28	-0.1224	0.84683	NC	No	No	1	PITRM1_exon_chr10:3138124	1	1	0	NA	1
1779	KLF6	54.4027	57.1975	0.1432	1	NC	No	No	1	KLF6_exon_chr10:3779590	1	1	0	NA	3	6.27	6.63	0.36	NA
1780	NET1	275.293	293.782	0.1071	0.773381	NC	No	No	1	NET1_exon_chr10:5456086	1	1	0	NA	1
1781	ASB13	97.4593	98.7245	0.0244	1	NC	No	No	1	ASB13_exon_chr10:5640830	1	1	0	NA	3	93.55	91.07	-2.48	NA
1782	TASOR2	225.094	264.927	0.2499	0.276392	NC	No	No	3	TASOR2_exon_chr10:5712822	0.0483	0.0523	0.004	NA	1
1783	TASOR2									TASOR2_exon_chr10:5730486	0.0921	0.0739	-0.0183	NA	1
1784	TASOR2									TASOR2_exon_chr10:5762531	0.8273	0.8215	-0.0058	NA	1
1785	GDI2	782.104	739.015	-0.0728	0.512305	NC	No	No	1	GDI2_exon_chr10:5766152	1	1	0	NA	1
1786	AL596094.1	6.4365	11.7026	0.7327	1	NC	No	No	1	AL596094.1_exon_chr10:5814226	1	1	0	NA	1
1787	ANKRD16	72.6666	70.6333	-0.0834	1	NC	No	No	2	ANKRD16_exon_chr10:5862691	0.0646	0.0796	0.015	NA	1
1788	ANKRD16									ANKRD16_exon_chr10:5878287	0.9354	0.9204	-0.015	NA	1
1789	FBH1	19.552	8.9929	-1.079	1	NC	No	No	1	FBH1_exon_chr10:5937109	1	1	0	NA	1
1790	IL15RA	11.2891	8.587	-0.2951	1	NC	No	No	3	IL15RA_exon_chr10:5949240	0.1617	0.1413	-0.0204	NA	1
1791	IL15RA									IL15RA_exon_chr10:5953326	0.7411	0.8321	0.091	NA	1
1792	IL15RA									IL15RA_exon_chr10:5958351	0.0972	0.0266	-0.0706	NA	1
1793	RBM17	994.628	990.304	-0.008	0.823755	NC	No	No	2	RBM17_exon_chr10:6104930	0.6783	0.6299	-0.0484	NA	1
1794	RBM17									RBM17_exon_chr10:6113906	0.3217	0.3701	0.0484	NA	5	28.42	25.14	-3.28	NA
1795	PFKFB3	82.7835	63.2057	-0.384	0.686671	NC	No	No	1	PFKFB3_exon_chr10:6232894	1	1	0	NA	1
1796	PRKCQ-AS1	21.3784	17.1507	-0.258	1	NC	No	No	1	PRKCQ-AS1_exon_chr10:6583675	1	1	0	NA	3	6.87	6.18	-0.69	NA
1797	AL392086.2	14.9243	15.8649	0.1861	1	NC	No	No	1	AL392086.2_exon_chr10:6737275	1	1	0	NA	1
1798	KIN	74.0879	91.0515	0.2475	1	NC	No	No	3	KIN_exon_chr10:7756142	0.2875	0.2262	-0.0613	NA	3	17.7	16.92	-0.77	NA
1799	KIN									KIN_exon_chr10:7769345	0.4969	0.4681	-0.0287	NA	1
1800	KIN									KIN_exon_chr10:7779019	0.2156	0.3056	0.09	NA	2	39.95	32.88	-7.07	NA
1801	ATP5F1C	858.886	976.975	0.1796	0.101453	NC	No	No	1	ATP5F1C_exon_chr10:7807658	1	1	0	NA	1
1802	TAF3	495.008	429.503	-0.2114	0.21633	NC	No	No	2	TAF3_exon_chr10:7963919	0.8996	0.8611	-0.0385	NA	6	67.36	64.86	-2.49	NA
1803	TAF3									TAF3_exon_chr10:8014636	0.1004	0.1389	0.0385	NA	3	91.12	85.95	-5.16	NA
1804	USP6NL	78.8877	115.793	0.544	0.0805388	NC	No	No	2	USP6NL_exon_chr10:11463849	0.8631	0.8636	0.0005	NA	15	77.43	84.22	6.79	NA
1805	USP6NL									USP6NL_exon_chr10:11565638	0.1369	0.1364	-0.0005	NA	2	40.02	20.7	-19.32	NA
1806	ECHDC3	44.053	44.4835	0.052	1	NC	No	No	1	ECHDC3_exon_chr10:11763223	1	1	0	NA	1
1807	PROSER2	58.5727	65.974	0.1745	1	NC	No	No	1	PROSER2_exon_chr10:11869489	1	1	0	NA	2	49.37	51.3	1.93	NA
1808	UPF2	727.498	667.231	-0.1174	0.428771	NC	No	No	2	UPF2_exon_chr10:11921307	0.0526	0.0604	0.0077	NA	4	90.69	89.32	-1.37	NA
1809	UPF2									UPF2_exon_chr10:12035897	0.9383	0.9228	-0.0154	NA	4	63.99	64.64	0.66	NA
1810	DHTKD1	54.2704	38.0249	-0.5433	1	NC	No	No	1	DHTKD1_exon_chr10:12120786	1	1	0	NA	5	50.34	54.02	3.68	NA
1811	SEC61A2	55.9417	63.349	0.1533	1	NC	No	No	2	SEC61A2_exon_chr10:12164267	0.9028	0.929	0.0262	NA	3	85.39	80.86	-4.54	NA
1812	SEC61A2									SEC61A2_exon_chr10:12169257	0.0972	0.071	-0.0262	NA	1
1813	NUDT5	537.013	563.792	0.084	0.648506	NC	No	No	1	NUDT5_exon_chr10:12167811	1	1	0	NA	8	13.32	12.9	-0.42	NA
1814	CDC123	1025.93	1112.03	0.1218	0.287889	NC	No	No	1	CDC123_exon_chr10:12249580	1	1	0	NA	1
1815	CAMK1D	18.7793	20.9894	0.0311	1	NC	No	No	1	CAMK1D_exon_chr10:12828768	1	1	0	NA	1
1816	CCDC3	66.9887	71.9287	0.1021	1	NC	No	No	1	CCDC3_exon_chr10:12898679	1	1	0	NA	1
1817	OPTN	103.99	129.941	0.334	0.4219	NC	No	No	4	OPTN_exon_chr10:13110179	0.0974	0.0688	-0.0286	NA	1
1818	OPTN									OPTN_exon_chr10:13122384	0.1322	0.1388	0.0066	NA	2	81.81	70.64	-11.17	NA
1819	OPTN									OPTN_exon_chr10:13125945	0.1121	0.203	0.0909	NA	1
1820	OPTN									OPTN_exon_chr10:13136744	0.5955	0.5153	-0.0802	NA	2	37.51	33.04	-4.47	NA
1821	MCM10	204.391	200.745	-0.0486	1	NC	No	No	3	MCM10_exon_chr10:13197622	0.0928	0.0997	0.0068	NA	1
1822	MCM10									MCM10_exon_chr10:13201420	0.2283	0.2797	0.0514	NA	1
1823	MCM10									MCM10_exon_chr10:13209090	0.6771	0.6207	-0.0565	NA	8	68.34	72.93	4.59	NA
1824	RNU6-6P	46.8471	63.4587	0.4102	0.660316	NC	No	No	1	RNU6-6P_exon_chr10:13217268	1	1	0	NA	1
1825	PHYH	44.6311	38.8774	-0.1537	1	NC	No	No	2	PHYH_exon_chr10:13278354	0.9755	0.899	-0.0766	NA	2	42.84	33.07	-9.77	NA
1826	PHYH									PHYH_exon_chr10:13291912	0.0245	0.101	0.0766	NA	1
1827	SEPHS1	334.173	320.35	-0.0586	0.777271	NC	No	No	1	SEPHS1_exon_chr10:13319356	1	1	0	NA	8	49.04	47.11	-1.93	NA
1828	BEND7	20.1513	18.0316	-0.1719	1	NC	No	No	3	BEND7_exon_chr10:13447319	0.7125	0.4285	-0.284	NA	3	91.06	82.56	-8.5	NA
1829	BEND7									BEND7_exon_chr10:13481124	0.1789	0.4288	0.2499	NA	1
1830	BEND7									BEND7_exon_chr10:13500080	0.1085	0.1427	0.0341	NA	1
1831	PRPF18	27.4577	24.922	-0.1571	1	NC	No	No	2	PRPF18_exon_chr10:13586938	0.788	0.7175	-0.0705	NA	1
1832	PRPF18									PRPF18_exon_chr10:13597457	0.212	0.2825	0.0705	NA	1
1833	AL157392.5	92.7321	84.4475	-0.1615	1	NC	No	No	1	AL157392.5_exon_chr10:13630259	1	1	0	NA	4	36.18	39.4	3.21	NA
1834	AL157392.3	26.1049	37.3787	0.4347	1	NC	No	No	2	AL157392.3_exon_chr10:13637854	0.0834	0.0386	-0.0447	NA	2	67.83	66.67	-1.16	NA
1835	AL157392.3									AL157392.3_exon_chr10:13653824	0.8329	0.9614	0.1285	NA	1
1836	FAM107B	78.0764	107.531	0.4388	0.543087	NC	No	No	3	FAM107B_exon_chr10:14521306	0.7726	0.8608	0.0882	NA	3	65.18	71.46	6.27	NA
1837	FAM107B									FAM107B_exon_chr10:14522225	0.125	0.0657	-0.0592	NA	1
1838	FAM107B									FAM107B_exon_chr10:14602850	0.1025	0.0734	-0.029	NA	2	67.52	71.64	4.12	NA
1839	HSPA14	187.121	202.752	0.1087	0.786333	NC	No	No	4	HSPA14_exon_chr10:14843370	0.2023	0.2078	0.0055	NA	3	54.21	73.79	19.58	NA
1840	HSPA14									HSPA14_exon_chr10:14849432	0.1279	0.1012	-0.0267	NA	1
1841	HSPA14									HSPA14_exon_chr10:14870596	0.1878	0.2381	0.0503	NA	1
1842	HSPA14									HSPA14_exon_chr10:14871527	0.457	0.4278	-0.0292	NA	1
1843	SUV39H2	54.868	42.7905	-0.3467	0.844932	NC	No	No	2	SUV39H2_exon_chr10:14896845	0.0732	0.0364	-0.0368	NA	2	64.87	52.77	-12.1	NA
1844	SUV39H2									SUV39H2_exon_chr10:14902405	0.9268	0.9636	0.0368	NA	1
1845	DCLRE1C	79.7023	84.1781	0.0168	1	NC	No	No	1	DCLRE1C_exon_chr10:14909330	1	1	0	NA	5	32.61	30.03	-2.59	NA
1846	ACBD7	48.3956	40.6742	-0.1761	1	NC	No	No	1	ACBD7_exon_chr10:15078603	1	1	0	NA	1
1847	NMT2	171.016	223.523	0.35	0.16003	NC	No	No	2	NMT2_exon_chr10:15109215	0.5989	0.5221	-0.0768	NA	12	32.21	31.7	-0.52	NA
1848	NMT2									NMT2_exon_chr10:15141557	0.3799	0.4731	0.0932	NA	1
1849	RPP38	236.592	225.805	-0.0841	0.831996	NC	No	No	1	RPP38_exon_chr10:15103304	1	1	0	NA	4	66.84	70.84	4	NA
1850	FAM171A1	148.414	159.737	0.0829	1	NC	No	No	1	FAM171A1_exon_chr10:15214601	1	1	0	NA	1
1851	MINDY3	41.6042	45.7601	0.1694	1	NC	No	No	1	MINDY3_exon_chr10:15779141	1	1	0	NA	4	65.1	69.24	4.14	NA
1852	PTER	60.5151	66.8364	0.135	1	NC	No	No	1	PTER_exon_chr10:16511045	1	1	0	NA	11	69.44	64.43	-5.01	NA
1853	RSU1	89.4839	87.1278	-0.0564	1	NC	No	No	1	RSU1_exon_chr10:16593496	1	1	0	NA	7	10.61	8.52	-2.09	NA
1854	AC067747.1	24.1171	38.3616	0.5703	1	NC	No	No	1	AC067747.1_exon_chr10:17149140	1	1	0	NA	7	41.66	51.07	9.42	NA
1855	VIM	40.8623	49.7135	0.2414	1	NC	No	No	1	VIM_exon_chr10:17237229	1	1	0	NA	3	71.38	67.7	-3.68	NA
1856	HACD1	112.916	106.359	-0.0411	1	NC	No	No	3	HACD1_exon_chr10:17590446	0.6101	0.6021	-0.008	NA	2	10.09	5.87	-4.22	NA
1857	HACD1									HACD1_exon_chr10:17599411	0.345	0.3415	-0.0034	NA	1
1858	HACD1									HACD1_exon_chr10:17615964	0.045	0.0564	0.0114	NA	1
1859	STAM	63.6265	81.1432	0.3152	1	NC	No	No	1	STAM_exon_chr10:17714542	1	1	0	NA	8	57.21	55.33	-1.88	NA
1860	AL450384.2	25.8326	16.9292	-0.5358	1	NC	No	No	1	AL450384.2_exon_chr10:18546145	1	1	0	NA	3	87.29	90.25	2.97	NA
1861	ARL5B	79.432	139.415	0.7795	0.00190122	UP	No	No	1	ARL5B_exon_chr10:18675167	1	1	0	NA	1
1862	NEBL	55.0398	52.265	-0.058	1	NC	No	No	3	NEBL_exon_chr10:20785923	0.7808	0.8267	0.0459	NA	5	68.27	58.07	-10.2	NA
1863	NEBL									NEBL_exon_chr10:20814043	0.0994	0.0935	-0.0059	NA	1
1864	NEBL									NEBL_exon_chr10:20840849	0.0939	0.0682	-0.0257	NA	1
1865	MIR1915HG	52.1644	65.8327	0.3135	0.830487	NC	No	No	1	MIR1915HG_exon_chr10:21495945	1	1	0	NA	4	33.63	36.54	2.91	NA
1866	SKIDA1	11.7121	25.0142	1.1831	1	NC	No	No	1	SKIDA1_exon_chr10:21519658	1	1	0	NA	1
1867	MLLT10	73.505	83.7116	0.2349	1	NC	No	No	3	MLLT10_exon_chr10:21556642	0.0441	0.131	0.0869	NA	1
1868	MLLT10									MLLT10_exon_chr10:21617111	0.1912	0.1665	-0.0247	NA	1
1869	MLLT10									MLLT10_exon_chr10:21741938	0.6656	0.6424	-0.0232	NA	1
1870	DNAJC1	341.899	311.872	-0.1288	0.62605	NC	No	No	3	DNAJC1_exon_chr10:21756755	0.1466	0.1335	-0.0132	NA	1
1871	DNAJC1									DNAJC1_exon_chr10:21904612	0.387	0.3847	-0.0023	NA	1
1872	DNAJC1									DNAJC1_exon_chr10:21919929	0.4663	0.4818	0.0154	NA	2	39.06	40.73	1.67	NA
1873	COMMD3-BMI1	65.811	74.5663	0.2189	1	NC	No	No	1	COMMD3-BMI1_exon_chr10:22317856	1	1	0	NA	1
1874	BMI1	241.921	252.776	0.0755	0.885373	NC	No	No	1	BMI1_exon_chr10:22329047	1	1	0	NA	10	37.13	35.67	-1.46	NA
1875	PIP4K2A	131.804	142.867	0.0661	1	NC	No	No	1	PIP4K2A_exon_chr10:22537281	1	1	0	NA	7	86.15	82.44	-3.71	NA
1876	MSRB2	50.0206	54.2428	0.0943	1	NC	No	No	1	MSRB2_exon_chr10:23120757	1	1	0	NA	2	13.99	14.51	0.51	NA
1877	OTUD1	31.8003	22.0483	-0.4799	1	NC	No	No	1	OTUD1_exon_chr10:23439457	1	1	0	NA	2	15.51	13.94	-1.57	NA
1878	KIAA1217	13.4277	27.4038	1.0266	1	NC	No	No	3	KIAA1217_exon_chr10:24527935	0.1054	0.098	-0.0073	NA	1
1879	KIAA1217									KIAA1217_exon_chr10:24533069	0.0829	0.0357	-0.0471	NA	5	75.93	80.88	4.95	NA
1880	KIAA1217									KIAA1217_exon_chr10:24544980	0.7854	0.8662	0.0808	NA	1
1881	ARHGAP21	296.113	312.13	0.0791	0.841378	NC	No	No	2	ARHGAP21_exon_chr10:24586106	0.9081	0.9335	0.0254	NA	5	24.8	22.23	-2.57	NA
1882	ARHGAP21									ARHGAP21_exon_chr10:24722279	0.0919	0.0665	-0.0254	NA	1
1883	THNSL1	22.112	19.3407	-0.2199	1	NC	No	No	1	THNSL1_exon_chr10:25023175	1	1	0	NA	2	10.31	20.19	9.88	NA
1884	ABI1	85.56	93.3383	0.1392	1	NC	No	No	1	ABI1_exon_chr10:26748745	1	1	0	NA	10	33.36	35.5	2.14	NA
1885	PDSS1	102.507	101.678	-0.042	1	NC	No	No	1	PDSS1_exon_chr10:26746332	1	1	0	NA	1
1886	FAM238C	13.0724	19.3125	0.5997	1	NC	No	No	1	FAM238C_exon_chr10:26931562	1	1	0	NA	1
1887	ANKRD26	293.974	292.798	0.015	1	NC	No	No	5	ANKRD26_exon_chr10:27024559	0.0556	0.0522	-0.0034	NA	1
1888	ANKRD26									ANKRD26_exon_chr10:27035752	0.5454	0.5098	-0.0355	NA	1
1889	ANKRD26									ANKRD26_exon_chr10:27038054	0.1918	0.2292	0.0373	NA	2	54.54	59.22	4.68	NA
1890	ANKRD26									ANKRD26_exon_chr10:27040178	0.0665	0.0598	-0.0068	NA	2	37	24.09	-12.91	NA
1891	ANKRD26									ANKRD26_exon_chr10:27048979	0.0676	0.055	-0.0126	NA	1
1892	YME1L1	903.771	894.411	-0.0148	0.817191	NC	No	No	1	YME1L1_exon_chr10:27112120	1	1	0	NA	11	28.18	30.72	2.53	NA
1893	MASTL	34.8691	33.3701	-0.065	1	NC	No	No	1	MASTL_exon_chr10:27186378	1	1	0	NA	2	37.19	40.95	3.76	NA
1894	ACBD5	52.6441	53.0336	0.0473	1	NC	No	No	2	ACBD5_exon_chr10:27197442	0.8962	0.8617	-0.0345	NA	4	76.2	73.79	-2.41	NA
1895	ACBD5									ACBD5_exon_chr10:27231820	0.1038	0.1025	-0.0013	NA	1
1896	RAB18	243.952	275.27	0.1825	0.467048	NC	No	No	1	RAB18_exon_chr10:27537875	1	1	0	NA	14	45.28	47.42	2.14	NA
1897	MKX	36.3921	28.9503	-0.2935	1	NC	No	No	1	MKX_exon_chr10:27675415	1	1	0	NA	4	75.78	90.43	14.65	NA
1898	ARMC4	22.1391	13.2549	-0.7998	1	NC	No	No	1	ARMC4_exon_chr10:27812625	1	1	0	NA	2	86.09	92.82	6.73	NA
1899	MPP7	143.702	104.367	-0.4745	0.0716321	NC	No	Yes	1	MPP7_exon_chr10:28054244	1	1	0	NA	6	86.81	85.56	-1.25	Both
1900	WAC-AS1	293.846	246.005	-0.2315	0.270469	NC	No	No	1	WAC-AS1_exon_chr10:28524611	1	1	0	NA	1
1901	WAC	991.418	1114.03	0.1631	0.111402	NC	No	No	1	WAC_exon_chr10:28619536	1	1	0	NA	3	31.98	30.68	-1.31	NA
1902	BAMBI	15.8377	22.1062	0.3911	1	NC	No	No	1	BAMBI_exon_chr10:28681257	1	1	0	NA	3	54.85	50.68	-4.17	NA
1903	RPL21P93	2679.51	2655.75	-0.0168	0.81287	NC	No	No	1	RPL21P93_exon_chr10:28899484	1	1	0	NA	1
1904	SVIL-AS1	36.396	33.4924	-0.0684	1	NC	No	No	3	SVIL-AS1_exon_chr10:29420490	0.7355	0.8751	0.1396	NA	5	86.05	83.56	-2.49	NA
1905	SVIL-AS1									SVIL-AS1_exon_chr10:29468919	0.1237	0.0663	-0.0574	NA	1
1906	SVIL-AS1									SVIL-AS1_exon_chr10:29482832	0.1408	0.0586	-0.0821	NA	1
1907	SVIL	65.6527	80.3018	0.3258	0.826585	NC	No	No	2	SVIL_exon_chr10:29458333	0.6889	0.7327	0.0437	NA	2	75.89	79.64	3.75	NA
1908	SVIL									SVIL_exon_chr10:29555108	0.3111	0.2659	-0.0452	NA	1
1909	JCAD	111.733	119.436	0.0987	1	NC	No	No	1	JCAD_exon_chr10:30017917	1	1	0	NA	9	83.6	74.47	-9.13	NA
1910	AL353796.1	9.0213	7.6013	-0.152	1	NC	No	No	1	AL353796.1_exon_chr10:30306066	1	1	0	NA	2	31.83	63.96	32.13	NA
1911	MTPAP	114.454	115.444	0.029	1	NC	No	No	2	MTPAP_exon_chr10:30313971	0.8795	0.8705	-0.009	NA	5	34.52	34.47	-0.05	NA
1912	MTPAP									MTPAP_exon_chr10:30340450	0.1205	0.1295	0.009	NA	2	8.65	18.42	9.76	NA
1913	MAP3K8	5.4123	5.9086	0.1427	1	NC	No	No	2	MAP3K8_exon_chr10:30438821	0.8646	0.9359	0.0714	NA	1
1914	MAP3K8									MAP3K8_exon_chr10:30460705	0.1354	0.0641	-0.0714	NA	2	35.42	33.33	-2.08	NA
1915	ZNF438	11.2468	10.9057	-0.1919	1	NC	No	No	1	ZNF438_exon_chr10:30845573	1	1	0	NA	1
1916	ZEB1-AS1	7.4787	11.9031	0.628	1	NC	No	No	1	ZEB1-AS1_exon_chr10:31319092	1	1	0	NA	1
1917	ZEB1	62.2535	63.0868	-0.0167	1	NC	No	No	1	ZEB1_exon_chr10:31526671	1	1	0	NA	5	12.82	12.61	-0.21	NA
1918	ARHGAP12	247.596	364.539	0.5327	0.000244279	UP	No	No	1	ARHGAP12_exon_chr10:31807832	1	1	0	NA	6	16.46	14.5	-1.96	NA
1919	KIF5B	1188.26	1334.56	0.1683	0.172453	NC	No	No	2	KIF5B_exon_chr10:32011516	0.6996	0.706	0.0064	NA	14	76.61	77.21	0.61	NA
1920	KIF5B									KIF5B_exon_chr10:32023036	0.2403	0.242	0.0016	NA	1
1921	EPC1	57.8159	67.6362	0.1923	1	NC	No	No	4	EPC1_exon_chr10:32269135	0.5863	0.5797	-0.0066	NA	2	90.53	81.15	-9.39	NA
1922	EPC1									EPC1_exon_chr10:32293194	0.1686	0.1717	0.0032	NA	1
1923	EPC1									EPC1_exon_chr10:32293737	0.0805	0.0696	-0.0109	NA	1
1924	EPC1									EPC1_exon_chr10:32345623	0.1585	0.1632	0.0047	NA	2	75.28	98.9	23.62	NA
1925	AL365203.2	7.3049	5.7434	-0.2229	1	NC	No	No	1	AL365203.2_exon_chr10:32889311	1	1	0	NA	1
1926	ITGB1	821.556	923.925	0.1762	0.19433	NC	No	No	2	ITGB1_exon_chr10:32901635	0.5957	0.6098	0.0141	NA	5	28.89	27.94	-0.94	NA
1927	ITGB1									ITGB1_exon_chr10:32930044	0.4043	0.3875	-0.0168	NA	1
1928	NRP1	11.9596	20.8577	0.7715	1	NC	No	No	2	NRP1_exon_chr10:33180365	0.5823	0.7395	0.1573	NA	1
1929	NRP1									NRP1_exon_chr10:33197709	0.3882	0.2605	-0.1277	NA	1
1930	PARD3	212.757	227.46	0.0774	0.91634	NC	No	No	4	PARD3_exon_chr10:34111562	0.2237	0.2063	-0.0174	NA	3	26.7	25.98	-0.72	NA
1931	PARD3									PARD3_exon_chr10:34284245	0.0649	0.0576	-0.0073	NA	1
1932	PARD3									PARD3_exon_chr10:34312382	0.3002	0.3033	0.0031	NA	1
1933	PARD3									PARD3_exon_chr10:34317338	0.4061	0.4219	0.0158	NA	2	46.46	45.95	-0.51	NA
1934	CUL2	202.873	168.16	-0.2347	0.451119	NC	No	No	1	CUL2_exon_chr10:35010442	1	1	0	NA	5	10.69	10.64	-0.05	NA
1935	CREM	54.25	72.7688	0.3915	0.586773	NC	No	No	2	CREM_exon_chr10:35179133	0.4822	0.5296	0.0474	NA	1
1936	CREM									CREM_exon_chr10:35211253	0.5178	0.4704	-0.0474	NA	6	19	34.5	15.5	NA
1937	AL117336.2	19.5113	18.0641	-0.1541	1	NC	No	No	1	AL117336.2_exon_chr10:35315425	1	1	0	NA	2	67.24	67.7	0.46	NA
1938	CCNY	210.226	259.838	0.3109	0.214255	NC	No	No	1	CCNY_exon_chr10:35569053	1	1	0	NA	8	56.69	56.31	-0.37	NA
1939	NAMPTP1	140.935	162.289	0.2382	0.465711	NC	No	No	1	NAMPTP1_exon_chr10:36524234	1	1	0	NA	3	31.73	31.32	-0.41	NA
1940	ZNF248	24.2179	29.8871	0.2974	1	NC	No	No	1	ZNF248_exon_chr10:37833116	1	1	0	NA	1
1941	ZNF33A	151.922	159.969	0.0398	1	NC	No	No	1	ZNF33A_exon_chr10:38054374	1	1	0	NA	7	90.92	88.08	-2.84	NA
1942	ZNF37A	142.981	148.959	0.0748	1	NC	No	No	1	ZNF37A_exon_chr10:38117389	1	1	0	NA	16	53.93	54.22	0.3	NA
1943	HSD17B7P2	149.641	144.216	-0.0719	1	NC	No	No	1	HSD17B7P2_exon_chr10:38377984	1	1	0	NA	1
1944	AL133216.2	6.1259	11.1888	0.7792	1	NC	No	No	1	AL133216.2_exon_chr10:38447814	1	1	0	NA	2	55.31	54.31	-1.01	NA
1945	AL133173.2	26.8138	36.6936	0.3844	1	NC	No	No	1	AL133173.2_exon_chr10:38617254	1	1	0	NA	2	90.32	87.91	-2.41	NA
1946	CCNYL2	16.6336	15.4211	-0.1184	1	NC	No	No	1	CCNYL2_exon_chr10:42410193	1	1	0	NA	3	58.15	62.81	4.66	NA
1947	LINC00839	31.8254	31.9002	0.0495	1	NC	No	No	2	LINC00839_exon_chr10:42477061	0.2042	0.2471	0.0429	NA	3	43.96	46.9	2.94	NA
1948	LINC00839									LINC00839_exon_chr10:42492079	0.7958	0.7529	-0.0429	NA	3	43.18	56.12	12.94	NA
1949	ZNF37BP	61.9983	56.5264	-0.0862	1	NC	No	No	1	ZNF37BP_exon_chr10:42521127	1	1	0	NA	14	53.35	51.26	-2.1	NA
1950	ZNF33B	79.9398	62.2335	-0.3555	1	NC	No	No	2	ZNF33B_exon_chr10:42583123	0.1259	0.1322	0.0063	NA	4	71.94	75.65	3.71	NA
1951	ZNF33B									ZNF33B_exon_chr10:42594699	0.8741	0.8678	-0.0063	NA	7	62.09	64.37	2.28	NA
1952	BMS1	615.626	684.437	0.1419	0.308192	NC	No	No	3	BMS1_exon_chr10:42796473	0.2035	0.1988	-0.0047	NA	1
1953	BMS1									BMS1_exon_chr10:42817317	0.1721	0.1636	-0.0085	NA	2	61.43	71.4	9.96	NA
1954	BMS1									BMS1_exon_chr10:42830865	0.5448	0.5571	0.0123	NA	1
1955	RET	14.5181	11.9326	-0.282	1	NC	No	No	3	RET_exon_chr10:43102301	0.6044	0.7371	0.1327	NA	1
1956	RET									RET_exon_chr10:43126574	0.1226	0.1396	0.017	NA	1
1957	RET									RET_exon_chr10:43128111	0.273	0.1233	-0.1497	NA	3	53.98	59.74	5.76	NA
1958	CSGALNACT2	40.7929	37.4869	-0.088	1	NC	No	No	2	CSGALNACT2_exon_chr10:43154896	0.2002	0.1094	-0.0908	NA	1
1959	CSGALNACT2									CSGALNACT2_exon_chr10:43183249	0.7998	0.8906	0.0908	NA	1
1960	RASGEF1A	84.6222	70.5946	-0.2162	1	NC	No	No	1	RASGEF1A_exon_chr10:43196268	1	1	0	NA	3	45.7	44.18	-1.52	NA
1961	HNRNPF	1525.28	1545.36	0.0237	0.773311	NC	No	No	1	HNRNPF_exon_chr10:43387936	1	1	0	NA	6	40.4	39.19	-1.22	NA
1962	ZNF487	9.8657	7.039	-0.3954	1	NC	No	No	2	ZNF487_exon_chr10:43451919	0.2616	0.1065	-0.155	NA	1
1963	ZNF487									ZNF487_exon_chr10:43481428	0.7384	0.8935	0.155	NA	1
1964	ZNF239	9.4443	12.3533	0.2551	1	NC	No	No	1	ZNF239_exon_chr10:43558171	1	1	0	NA	1
1965	ZNF485	10.5754	7.0273	-0.5344	1	NC	No	No	1	ZNF485_exon_chr10:43616290	1	1	0	NA	3	44.61	13.81	-30.8	NA
1966	ZNF32	40.4946	47.8228	0.2941	1	NC	No	No	1	ZNF32_exon_chr10:43644801	1	1	0	NA	1
1967	RASSF4	7.1693	14.0727	0.8749	1	NC	No	No	2	RASSF4_exon_chr10:44990947	0.0989	0.1968	0.0978	NA	1
1968	RASSF4									RASSF4_exon_chr10:44993268	0.9011	0.8032	-0.0978	NA	1
1969	ZNF22	49.8389	48.3988	-0.0325	1	NC	No	No	1	ZNF22_exon_chr10:45003279	1	1	0	NA	2	93.57	94.87	1.3	NA
1970	RPS19P7	81.4023	106.937	0.4137	0.350726	NC	No	No	1	RPS19P7_exon_chr10:45073541	1	1	0	NA	1
1971	2020-03-08	89.6724	63.8369	-0.4375	0.450455	NC	No	No	2	MARCH8_exon_chr10:45458543	0.502	0.5048	0.0028	NA	1
1972	2020-03-08									MARCH8_exon_chr10:GL383546v1	0.498	0.4952	-0.0028	NA	1
1973	ZFAND4	19.2191	16.9322	-0.2106	1	NC	No	No	3	ZFAND4_exon_chr10:45616571	0.396	0.5879	0.1919	NA	3	88.98	89.16	0.18	NA
1974	ZFAND4									ZFAND4_exon_chr10:45618260	0.4725	0.2808	-0.1918	NA	2	84.75	52.91	-31.84	NA
1975	ZFAND4									ZFAND4_exon_chr10:45639963	0.1315	0.1313	-0.0002	NA	1
1976	WASHC2C	82.2252	81.1086	-0.0093	1	NC	No	No	3	WASHC2C_exon_chr10:45751481	0.0536	0.0484	-0.0051	NA	1
1977	WASHC2C									WASHC2C_exon_chr10:45790355	0.0486	0.0878	0.0392	NA	1
1978	WASHC2C									WASHC2C_exon_chr10:45792260	0.8626	0.792	-0.0706	NA	2	65.8	56.81	-8.99	NA
1979	AGAP4	54.8345	51.3323	-0.1065	1	NC	No	No	1	AGAP4_exon_chr10:45827390	1	1	0	NA	1
1980	TIMM23	516.691	564.3	0.1162	0.549484	NC	No	No	1	TIMM23_exon_chr10:46003202	1	1	0	NA	1
1981	NCOA4	237.352	248.745	0.0586	0.989377	NC	No	No	2	NCOA4_exon_chr10:46006597	0.9205	0.9199	-0.0006	NA	1
1982	NCOA4									NCOA4_exon_chr10:46011206	0.0795	0.0801	0.0006	NA	2	90.01	91.61	1.6	NA
1983	AGAP7P	14.0959	17.7146	0.1987	1	NC	No	No	1	AGAP7P_exon_chr10:46129882	1	1	0	NA	1
1984	SYT15	9.8673	9.0682	-0.0589	1	NC	No	No	1	SYT15_exon_chr10:46593988	1	1	0	NA	1
1985	SHLD2P1	7.3248	7.982	0.1282	1	NC	No	No	1	SHLD2P1_exon_chr10:46611449	1	1	0	NA	2	18.33	35.92	17.6	NA
1986	BMS1P1	10.4677	12.3886	0.1974	1	NC	No	No	2	BMS1P1_exon_chr10:46788396	0.7223	0.8413	0.119	NA	1
1987	BMS1P1									BMS1P1_exon_chr10:46808995	0.2777	0.1587	-0.119	NA	2	0.53	27.06	26.52	NA
1988	ZNF488	24.6784	19.7359	-0.2871	1	NC	No	No	1	ZNF488_exon_chr10:47368937	1	1	0	NA	1
1989	AGAP9	24.7438	25.5546	0.1117	1	NC	No	No	1	AGAP9_exon_chr10:47503543	1	1	0	NA	1
1990	AL591684.2	15.7433	17.7767	0.0775	1	NC	No	No	1	AL591684.2_exon_chr10:47551954	1	1	0	NA	1
1991	SHLD2P3	12.0482	14.7981	0.3815	1	NC	No	No	1	SHLD2P3_exon_chr10:47730236	1	1	0	NA	2	55.82	67.84	12.01	NA
1992	AGAP12P	23.6741	23.8177	0.0587	1	NC	No	No	1	AGAP12P_exon_chr10:48011645	1	1	0	NA	1
1993	BMS1P7	5.39	6.4592	0.2554	1	NC	No	No	1	BMS1P7_exon_chr10:48060016	1	1	0	NA	1
1994	MAPK8	165.773	182.096	0.1523	0.682493	NC	No	No	1	MAPK8_exon_chr10:48434878	1	1	0	NA	10	22.36	22.08	-0.28	NA
1995	AC016397.2	64.9007	63.2412	-0.0637	1	NC	No	No	1	AC016397.2_exon_chr10:48446619	1	1	0	NA	1
1996	ARHGAP22	9.0189	8.5123	-0.331	1	NC	No	No	2	ARHGAP22_exon_chr10:48532955	0.8822	0.9461	0.0639	NA	1
1997	ARHGAP22									ARHGAP22_exon_chr10:48583152	0.1178	0.0539	-0.0639	NA	1
1998	ERCC6	10.6432	10.2103	0.06	1	NC	No	No	3	ERCC6_exon_chr10:49459234	0.3783	0.39	0.0118	NA	4	72.82	68.5	-4.32	NA
[truncated: 16,326 more rows]

## Sheet: PUM2 RNAi
PUM2 RNAi PAC-Seq Differential Expression Analysis
Sort Refresh	Gene Name	Mean Counts NTC RNAi	Mean Counts PUM2 RNAi	Fold Change	pAdj	DE Result	Any Splicing APA?	Any Tandem APA?	#Exons with a PAC	Exon Names	Exon fraction NTC RNAi	Exon fraction PUM2 RNAi	Exon Fraction Change	Exon Results (NA = Not significant)	#PACs per Exon	PDU per Exon NTC RNAi	PDU per Exon PUM2 RNAi	delta-PDU per Exon	PAC Changes
1	WASH7P	661.669	602.44	-0.1327	0.358708	NC	No	No	1	WASH7P_exon_chr1:14501	1	1	0	NA	2	30.6	31.22	0.62	NA
2	AL627309.6	22.7222	21.5053	-0.0721	1	NC	No	No	1	AL627309.6_exon_chr1:135895	1	1	0	NA	1
3	AP006222.1	32.0288	33.6791	0.0512	1	NC	No	No	1	AP006222.1_exon_chr1:259025	1	1	0	NA	3	16.7	19.17	2.47	NA
4	AL669831.3	47.2529	40.2918	-0.2307	1	NC	No	No	2	AL669831.3_exon_chr1:594756	0.3118	0.351	0.0392	NA	1
5	AL669831.3									AL669831.3_exon_chr1:633129	0.6882	0.649	-0.0392	NA	1
6	MTND1P23	81621.7	94736.2	0.2149	0.0101406	NC	No	No	1	MTND1P23_exon_chr1:629061	1	1	0	NA	13	29.89	29.13	-0.76	NA
7	MTATP6P1	113464	114517	0.0133	0.824386	NC	No	No	1	MTATP6P1_exon_chr1:631073	1	1	0	NA	26	30.01	29.62	-0.38	NA
8	AC114498.2	257.562	244.471	-0.0735	1	NC	No	No	1	AC114498.2_exon_chr1:632413	1	1	0	NA	2	84.7	85.31	0.61	NA
9	AL669831.1	40.5784	44.544	0.1452	1	NC	No	No	1	AL669831.1_exon_chr1:729804	1	1	0	NA	2	59.38	52.76	-6.63	NA
10	LINC01128	40.703	47.9159	0.2142	1	NC	No	No	2	LINC01128_exon_chr1:841199	0.2338	0.1628	-0.0711	NA	4	85.36	63.67	-21.68	NA
11	LINC01128									LINC01128_exon_chr1:853390	0.7662	0.8372	0.0711	NA	8	28.18	22.65	-5.53	NA
12	LINC02593	15.1677	12.7795	-0.2172	1	NC	No	No	1	LINC02593_exon_chr1:921016	1	1	0	NA	1
13	NOC2L	568.111	594.471	0.0686	0.657811	NC	No	No	1	NOC2L_exon_chr1:944800	1	1	0	NA	1
14	SAMD11	18.644	19.0925	0.0043	1	NC	No	No	1	SAMD11_exon_chr1:943697	1	1	0	NA	1
15	KLHL17	153.423	158.482	0.0373	1	NC	No	No	1	KLHL17_exon_chr1:964962	1	1	0	NA	1
16	PLEKHN1	45.8003	49.2879	0.0786	1	NC	No	No	1	PLEKHN1_exon_chr1:974441	1	1	0	NA	3	70.23	55.23	-15	NA
17	AL645608.7	14.1776	15.2848	0.0793	1	NC	No	No	1	AL645608.7_exon_chr1:998051	1	1	0	NA	1
18	HES4	69.3988	65.732	-0.0662	1	NC	No	No	1	HES4_exon_chr1:999432	1	1	0	NA	1
19	ISG15	3398.54	2756.58	-0.3029	2.10097e-05	NC	No	No	1	ISG15_exon_chr1:1013983	1	1	0	NA	1
20	AGRN	413.603	411.74	-0.0048	0.889209	NC	No	No	1	AGRN_exon_chr1:1054823	1	1	0	NA	1
21	AL390719.1	36.6786	43.4592	0.2378	1	NC	No	No	1	AL390719.1_exon_chr1:1065829	1	1	0	NA	2	62.45	63.81	1.36	NA
22	RNF223	27.9481	22.1679	-0.3665	1	NC	No	No	1	RNF223_exon_chr1:1072575	1	1	0	NA	2	72.8	72.13	-0.67	NA
23	C1orf159	195.889	157.095	-0.3213	0.213076	NC	No	No	1	C1orf159_exon_chr1:1084506	1	1	0	NA	1
24	AL390719.2	22.7528	17.9541	-0.324	1	NC	No	No	1	AL390719.2_exon_chr1:1169356	1	1	0	NA	1
25	TNFRSF18	360.139	355.542	-0.0175	0.850746	NC	No	No	1	TNFRSF18_exon_chr1:1203968	1	1	0	NA	1
26	SDF4	895.135	881.556	-0.0235	0.80323	NC	No	No	1	SDF4_exon_chr1:1217804	1	1	0	NA	1
27	B3GALT6	130.748	130.529	0.0021	1	NC	No	No	1	B3GALT6_exon_chr1:1232236	1	1	0	NA	4	67.69	60.55	-7.13	NA
28	C1QTNF12	10.6262	6.8971	-0.6355	1	NC	No	No	1	C1QTNF12_exon_chr1:1242646	1	1	0	NA	1
29	UBE2J2	196.937	195.415	-0.0138	1	NC	No	No	1	UBE2J2_exon_chr1:1255487	1	1	0	NA	3	15.39	9.96	-5.42	NA
30	SCNN1D	37.6448	30.8437	-0.2926	1	NC	No	No	1	SCNN1D_exon_chr1:1291253	1	1	0	NA	1
31	ACAP3	49.2552	41.6266	-0.263	1	NC	No	No	1	ACAP3_exon_chr1:1293708	1	1	0	NA	2	8.52	8.45	-0.07	NA
32	INTS11	718	678.232	-0.0788	0.588456	NC	No	No	1	INTS11_exon_chr1:1315697	1	1	0	NA	1
33	PUSL1	307.783	329.636	0.099	0.603327	NC	No	No	1	PUSL1_exon_chr1:1311329	1	1	0	NA	1
34	AL139287.1	62.7236	47.8154	-0.4007	0.78235	NC	No	No	2	AL139287.1_exon_chr1:1317899	0.2228	0.2743	0.0515	NA	2	93.03	93.17	0.13	NA
35	AL139287.1									AL139287.1_exon_chr1:1321096	0.7772	0.7257	-0.0515	NA	3	96.13	93.44	-2.69	NA
36	CPTP	103.452	101.817	-0.0401	1	NC	No	No	1	CPTP_exon_chr1:1327240	1	1	0	NA	1
37	DVL1	245.203	245.717	0.0098	1	NC	No	No	1	DVL1_exon_chr1:1336515	1	1	0	NA	1
38	AURKAIP1	781.067	779.933	-0.0044	0.863912	NC	No	No	1	AURKAIP1_exon_chr1:1373902	1	1	0	NA	1
39	CCNL2	237.397	222.417	-0.095	0.863818	NC	No	No	2	CCNL2_exon_chr1:1387582	0.7787	0.7536	-0.0251	NA	6	49.49	50.03	0.54	NA
40	CCNL2									CCNL2_exon_chr1:1392803	0.2213	0.2464	0.0251	NA	5	12.64	13.14	0.5	NA
41	MRPL20-AS1	94.0754	81.0401	-0.2128	0.821222	NC	No	No	1	MRPL20-AS1_exon_chr1:1399519	1	1	0	NA	1
42	MRPL20	1018.48	1059.8	0.0585	0.657811	NC	No	No	1	MRPL20_exon_chr1:1402601	1	1	0	NA	2	83.01	83.16	0.15	NA
43	VWA1	159.977	152.664	-0.0817	1	NC	No	No	1	VWA1_exon_chr1:1439080	1	1	0	NA	2	8.8	6.4	-2.4	NA
44	ATAD3B	224.994	338.478	0.5812	0.000744099	UP	No	No	1	ATAD3B_exon_chr1:1495484	1	1	0	NA	1
45	ATAD3A	743.398	657.608	-0.1818	0.221189	NC	No	No	1	ATAD3A_exon_chr1:1533925	1	1	0	NA	1
46	SSU72	578.213	445.383	-0.3769	0.00856522	NC	No	No	2	SSU72_exon_chr1:1542167	0.8745	0.8685	-0.006	NA	1
47	SSU72									SSU72_exon_chr1:1564916	0.1255	0.1315	0.006	NA	6	71.5	47.76	-23.75	NA
48	FNDC10	48.5426	32.0642	-0.6391	0.540442	NC	No	No	1	FNDC10_exon_chr1:1600135	1	1	0	NA	1
49	MIB2	223.892	197.579	-0.1812	0.606516	NC	No	No	2	MIB2_exon_chr1:1616273	0.0816	0.0443	-0.0374	NA	1
50	MIB2									MIB2_exon_chr1:1630291	0.9184	0.9557	0.0374	NA	1
51	CDK11B	1670.41	1724.07	0.0479	0.71058	NC	No	No	5	CDK11B_exon_chr1:1635856	0.0717	0.0823	0.0106	NA	2	51.95	44.08	-7.87	NA
52	CDK11B									CDK11B_exon_chr1:1641113	0.1822	0.1532	-0.029	NA	1
53	CDK11B									CDK11B_exon_chr1:1642508	0.237	0.2337	-0.0033	NA	1
54	CDK11B									CDK11B_exon_chr1:1649637	0.208	0.2248	0.0169	NA	3	14.46	16.99	2.53	NA
55	CDK11B									CDK11B_exon_chr1:1652566	0.2604	0.2559	-0.0045	NA	1
56	SLC35E2B	98.7092	90.2424	-0.1155	1	NC	No	No	2	SLC35E2B_exon_chr1:1660111	0.16	0.18	0.02	NA	1
57	SLC35E2B									SLC35E2B_exon_chr1:1666019	0.84	0.82	-0.02	NA	5	82.4	78.89	-3.52	NA
58	AL031282.2	118.895	136.98	0.1981	0.616594	NC	No	No	1	AL031282.2_exon_chr1:1705025	1	1	0	NA	2	54.24	46.79	-7.45	NA
59	CDK11A	964.078	971.727	0.0151	0.780122	NC	No	No	3	CDK11A_exon_chr1:1708245	0.3272	0.3035	-0.0237	NA	1
60	CDK11A									CDK11A_exon_chr1:1709640	0.4213	0.4295	0.0081	NA	1
61	CDK11A									CDK11A_exon_chr1:1719455	0.1438	0.1405	-0.0033	NA	3	89.44	85.67	-3.77	NA
62	SLC35E2A	108.874	107.328	-0.0071	1	NC	No	No	2	SLC35E2A_exon_chr1:1725422	0.1371	0.1514	0.0142	NA	1
63	SLC35E2A									SLC35E2A_exon_chr1:1732523	0.8629	0.8486	-0.0142	NA	1
64	NADK	137.099	134.999	-0.0206	1	NC	No	No	1	NADK_exon_chr1:1753060	1	1	0	NA	3	53.96	57.29	3.33	NA
65	GNB1	1940.08	1973.91	0.0249	0.790344	NC	No	No	1	GNB1_exon_chr1:1787053	1	1	0	NA	4	90.66	89.58	-1.08	NA
66	TMEM52	124.251	106.887	-0.2268	0.597008	NC	No	No	1	TMEM52_exon_chr1:1919279	1	1	0	NA	1
67	CFAP74	12.3725	15.1246	0.2747	1	NC	No	No	2	CFAP74_exon_chr1:1985112	0.1659	0.1735	0.0076	NA	1
68	CFAP74									CFAP74_exon_chr1:1988133	0.8341	0.8265	-0.0076	NA	1
69	GABRD	79.8219	75.5099	-0.0797	1	NC	No	No	2	GABRD_exon_chr1:2025517	0.0679	0.0534	-0.0145	NA	1
70	GABRD									GABRD_exon_chr1:2029550	0.9321	0.9466	0.0145	NA	1
71	FAAP20	311.755	290.226	-0.1011	0.786672	NC	No	No	2	FAAP20_exon_chr1:2185513	0.2042	0.1089	-0.0953	NA	1
72	FAAP20									FAAP20_exon_chr1:2193910	0.7958	0.8911	0.0953	NA	7	93.15	92.07	-1.08	NA
73	PRKCZ	173.222	184.234	0.0848	1	NC	No	No	1	PRKCZ_exon_chr1:2184921	1	1	0	NA	1
74	SKI	153.785	162.116	0.0674	1	NC	No	No	1	SKI_exon_chr1:2306576	1	1	0	NA	6	49.81	46.83	-2.97	NA
75	MORN1	6.9749	5.6769	-0.2871	1	NC	No	No	6	MORN1_exon_chr1:2321579	0.2411	0.0871	-0.154	NA	1
76	MORN1									MORN1_exon_chr1:2332753	0.1206	0.3011	0.1806	NA	1
77	MORN1									MORN1_exon_chr1:2355464	0.1154	0.2295	0.1142	NA	1
78	MORN1									MORN1_exon_chr1:2372591	0.0577	0.2053	0.1476	NA	1
79	MORN1									MORN1_exon_chr1:2379227	0.1163	0.1208	0.0045	NA	1
80	MORN1									MORN1_exon_chr1:2388509	0.3489	0.0561	-0.2929	NA	1
81	RER1	442.965	450.146	0.0244	0.851827	NC	No	No	1	RER1_exon_chr1:2403034	1	1	0	NA	5	26.48	19.87	-6.61	NA
82	PEX10	108.493	84.3584	-0.3578	0.336263	NC	No	No	1	PEX10_exon_chr1:2405834	1	1	0	NA	4	64.65	56.24	-8.41	NA
83	PLCH2	17.3979	11.0169	-0.7045	1	NC	No	No	2	PLCH2_exon_chr1:2499640	0.5	0.5231	0.0231	NA	1
84	PLCH2									PLCH2_exon_chr1:KI270762v1	0.5	0.4769	-0.0231	NA	1
85	PANK4	80.5211	107.697	0.4209	0.24649	NC	No	No	2	PANK4_exon_chr1:2509060	0.5078	0.5008	-0.0069	NA	1
86	PANK4									PANK4_exon_chr1:KI270762v1	0.4922	0.4992	0.0069	NA	1
87	PRXL2B	176.329	189.326	0.1006	0.871805	NC	No	No	2	PRXL2B_exon_chr1:2589409	0.4988	0.5004	0.0016	NA	1
88	PRXL2B									PRXL2B_exon_chr1:KI270762v1	0.5012	0.4996	-0.0016	NA	1
89	PRDM16-DT	16.4898	16.0895	-0.0784	1	NC	No	No	1	PRDM16-DT_exon_chr1:3064302	1	1	0	NA	2	16.89	6.17	-10.72	NA
90	PRDM16	13.6971	15.3936	0.1583	1	NC	No	No	2	PRDM16_exon_chr1:3386675	0.0596	0.0538	-0.0058	NA	4	35.17	45.96	10.79	NA
91	PRDM16									PRDM16_exon_chr1:3433676	0.9404	0.9462	0.0058	NA	1
92	ARHGEF16	559.757	462.123	-0.2728	0.0624346	NC	No	No	1	ARHGEF16_exon_chr1:3480447	1	1	0	NA	1
93	MEGF6	72.7404	74.4288	0.0469	1	NC	No	No	1	MEGF6_exon_chr1:3490589	1	1	0	NA	3	51.18	63.05	11.87	NA
94	TPRG1L	368.484	361.975	-0.0247	0.842027	NC	No	No	1	TPRG1L_exon_chr1:3628408	1	1	0	NA	1
95	WRAP73	127.208	144.472	0.1894	0.678023	NC	No	No	2	WRAP73_exon_chr1:3637098	0.8824	0.9483	0.066	NA	1
96	WRAP73									WRAP73_exon_chr1:3647560	0.1176	0.0517	-0.066	NA	1
97	TP73	112.914	103.751	-0.1113	1	NC	No	No	1	TP73_exon_chr1:3732746	1	1	0	NA	2	56.76	55.34	-1.41	NA
98	SMIM1	8.2927	14.8913	0.8179	1	NC	No	No	1	SMIM1_exon_chr1:3775298	1	1	0	NA	1
99	LRRC47	380.877	389.363	0.0261	0.848355	NC	No	No	1	LRRC47_exon_chr1:3781336	1	1	0	NA	1
100	CEP104	168.68	176.75	0.066	1	NC	No	No	1	CEP104_exon_chr1:3815517	1	1	0	NA	7	20.55	16.4	-4.15	NA
101	DFFB	31.3956	36.9572	0.2211	1	NC	No	No	1	DFFB_exon_chr1:3883506	1	1	0	NA	1
102	C1orf174	165.5	139.333	-0.2418	0.5066	NC	No	No	1	C1orf174_exon_chr1:3890073	1	1	0	NA	1
103	MIR4689	15.6756	13.3979	-0.2159	1	NC	No	No	1	MIR4689_exon_chr1:5866458	1	1	0	NA	2	94.81	95.08	0.28	NA
104	KCNAB2	101.689	80.4109	-0.3309	0.547523	NC	No	No	2	KCNAB2_exon_chr1:6018634	0.0409	0.0671	0.0261	NA	2	30	86	56	NA
105	KCNAB2									KCNAB2_exon_chr1:6097268	0.9591	0.9329	-0.0261	NA	1
106	CHD5	29.7021	29.2872	0.0199	1	NC	No	No	1	CHD5_exon_chr1:6105427	1	1	0	NA	2	65.27	76.93	11.66	NA
107	AL031847.2	140.691	141.065	0.0098	1	NC	No	No	1	AL031847.2_exon_chr1:6159515	1	1	0	NA	1
108	RPL22	12042.4	12289.5	0.0293	0.67948	NC	No	No	1	RPL22_exon_chr1:6186816	1	1	0	NA	9	34.17	34.69	0.52	NA
109	RNF207	83.0979	62.287	-0.4214	0.376252	NC	No	No	1	RNF207_exon_chr1:6219235	1	1	0	NA	3	33.39	27.89	-5.5	NA
110	ICMT	443.382	428.789	-0.0406	0.78059	NC	No	No	1	ICMT_exon_chr1:6225262	1	1	0	NA	6	20.75	20.18	-0.58	NA
111	LINC00337	29.3957	35.7868	0.2515	1	NC	No	No	1	LINC00337_exon_chr1:6238220	1	1	0	NA	2	84.81	85.29	0.49	NA
112	GPR153	30.2322	37.3751	0.2996	1	NC	No	No	1	GPR153_exon_chr1:6250003	1	1	0	NA	1
113	ACOT7	1697.45	1590.78	-0.0949	0.452492	NC	No	No	1	ACOT7_exon_chr1:6264695	1	1	0	NA	1
114	HES2	46.7962	45.3063	-0.0598	1	NC	No	No	1	HES2_exon_chr1:6419340	1	1	0	NA	5	32.4	25.02	-7.38	NA
115	ESPN	162.72	149.888	-0.13	0.939254	NC	No	No	2	ESPN_exon_chr1:6454433	0.1633	0.169	0.0057	NA	1
116	ESPN									ESPN_exon_chr1:6459996	0.8367	0.831	-0.0057	NA	3	43.94	52.11	8.17	NA
117	TNFRSF25	216.301	196.374	-0.1432	0.718543	NC	No	No	1	TNFRSF25_exon_chr1:6462174	1	1	0	NA	1
118	PLEKHG5	39.0855	36.4974	-0.1156	1	NC	No	No	1	PLEKHG5_exon_chr1:6467572	1	1	0	NA	1
119	NOL9	139.405	164.297	0.2385	0.464726	NC	No	No	1	NOL9_exon_chr1:6526003	1	1	0	NA	5	90.62	93.17	2.55	NA
120	ZBTB48	37.0577	31.5079	-0.2379	1	NC	No	No	1	ZBTB48_exon_chr1:6588059	1	1	0	NA	1
121	KLHL21	115.312	114.075	-0.0168	1	NC	No	No	1	KLHL21_exon_chr1:6595557	1	1	0	NA	1
122	PHF13	161.871	179.504	0.1473	0.737339	NC	No	No	1	PHF13_exon_chr1:6621410	1	1	0	NA	1
123	THAP3	107.877	101.368	-0.0811	1	NC	No	No	1	THAP3_exon_chr1:6632369	1	1	0	NA	1
124	DNAJC11	160.541	152.534	-0.078	0.995248	NC	No	No	1	DNAJC11_exon_chr1:6635700	1	1	0	NA	3	83.04	79.73	-3.32	NA
125	CAMTA1	282.299	269.615	-0.0725	0.895074	NC	No	No	3	CAMTA1_exon_chr1:6871756	0.3438	0.3356	-0.0083	NA	2	96.35	89.88	-6.47	NA
126	CAMTA1									CAMTA1_exon_chr1:6887653	0.5537	0.5309	-0.0228	NA	1
127	CAMTA1									CAMTA1_exon_chr1:7766458	0.1025	0.1335	0.031	NA	1
128	VAMP3	554.234	586.071	0.0763	0.639848	NC	No	No	1	VAMP3_exon_chr1:7779625	1	1	0	NA	1
129	UTS2	15.4946	9.8288	-0.6891	1	NC	No	No	2	UTS2_exon_chr1:7843950	0.1607	0.2023	0.0416	NA	3	89.5	66.8	-22.69	NA
130	UTS2									UTS2_exon_chr1:7847882	0.8393	0.7977	-0.0416	NA	1
131	PARK7	1048.3	1074.33	0.0375	0.767053	NC	No	No	1	PARK7_exon_chr1:7984863	1	1	0	NA	1
132	AL034417.4	5.3746	7.652	0.4912	1	NC	No	No	1	AL034417.4_exon_chr1:8003987	1	1	0	NA	3	59.66	44.95	-14.71	NA
133	ERRFI1	1381.63	1458.59	0.0758	0.523735	NC	No	No	1	ERRFI1_exon_chr1:8015400	1	1	0	NA	1
134	SLC45A1	108.182	101.092	-0.1086	1	NC	No	No	1	SLC45A1_exon_chr1:8343746	1	1	0	NA	1
135	RERE	152.812	162.145	0.0739	1	NC	No	No	2	RERE_exon_chr1:8355120	0.5605	0.5668	0.0063	NA	6	80.29	63.7	-16.59	NA
136	RERE									RERE_exon_chr1:8656441	0.4342	0.4231	-0.011	NA	3	35.41	32.04	-3.37	NA
137	ENO1	11100.7	9846.72	-0.1729	0.0423264	NC	No	No	1	ENO1_exon_chr1:8861429	1	1	0	NA	1
138	GPR157	16.4633	23.4324	0.4792	1	NC	No	No	1	GPR157_exon_chr1:9104634	1	1	0	NA	1
139	MIR34AHG	11.5378	10.5133	-0.0843	1	NC	No	No	1	MIR34AHG_exon_chr1:9151835	1	1	0	NA	1
140	LNCTAM34A	7.9641	6.28	-0.3489	1	NC	No	No	1	LNCTAM34A_exon_chr1:9191392	1	1	0	NA	1
141	H6PD	65.6034	49.7212	-0.4229	0.847189	NC	No	No	1	H6PD_exon_chr1:9263508	1	1	0	NA	1
142	SPSB1	48.464	58.2957	0.2742	1	NC	No	No	1	SPSB1_exon_chr1:9367447	1	1	0	NA	2	78.64	71.17	-7.47	NA
143	SLC25A33	223.404	238.819	0.0946	0.85676	NC	No	No	1	SLC25A33_exon_chr1:9582298	1	1	0	NA	5	81.73	83.27	1.54	NA
144	TMEM201	272.035	278.599	0.0325	1	NC	No	No	2	TMEM201_exon_chr1:9602068	0.0835	0.1059	0.0224	NA	1
145	TMEM201									TMEM201_exon_chr1:9612985	0.9165	0.8941	-0.0224	NA	1
146	PIK3CD-AS2	78.0756	56.9716	-0.4776	0.568336	NC	No	No	2	PIK3CD-AS2_exon_chr1:9672719	0.1851	0.1396	-0.0455	NA	1
147	PIK3CD-AS2									PIK3CD-AS2_exon_chr1:9681135	0.8149	0.8604	0.0455	NA	1
148	PIK3CD	120.191	140.578	0.2164	0.647084	NC	No	No	1	PIK3CD_exon_chr1:9726908	1	1	0	NA	1
149	CLSTN1	403.915	380.611	-0.0871	0.642075	NC	No	No	1	CLSTN1_exon_chr1:9730705	1	1	0	NA	3	80.28	79.67	-0.6	NA
150	CTNNBIP1	256.857	199.604	-0.3675	0.053899	NC	No	No	1	CTNNBIP1_exon_chr1:9850776	1	1	0	NA	4	46.15	38.18	-7.98	NA
151	LZIC	213.254	261.841	0.3046	0.193898	NC	No	No	2	LZIC_exon_chr1:9922358	0.061	0.0495	-0.0114	NA	1
152	LZIC									LZIC_exon_chr1:9930457	0.939	0.9505	0.0114	NA	12	50.45	40.5	-9.95	NA
153	AL603962.1	35.1664	41.1822	0.2049	1	NC	No	No	1	AL603962.1_exon_chr1:9982300	1	1	0	NA	4	27.43	22.58	-4.85	NA
154	RBP7	554.101	567.904	0.0375	0.782023	NC	No	No	1	RBP7_exon_chr1:10015781	1	1	0	NA	1
155	UBE4B	130.84	127.286	-0.0397	1	NC	No	No	1	UBE4B_exon_chr1:10179894	1	1	0	NA	3	48.56	35.55	-13.01	NA
156	KIF1B	260.581	263.397	0.0179	1	NC	No	No	4	KIF1B_exon_chr1:10296896	0.0417	0.0622	0.0205	NA	1
157	KIF1B									KIF1B_exon_chr1:10297173	0.3779	0.3009	-0.077	NA	1
158	KIF1B									KIF1B_exon_chr1:10303162	0.1795	0.2432	0.0637	NA	1
159	KIF1B									KIF1B_exon_chr1:10376544	0.3436	0.354	0.0104	NA	1
160	PGD	783.207	742.158	-0.074	0.606516	NC	No	No	1	PGD_exon_chr1:10419416	1	1	0	NA	2	19.14	18.31	-0.83	NA
161	CENPS-CORT	262.562	219.713	-0.2578	0.331285	NC	No	No	2	CENPS-CORT_exon_chr1:10442264	0.7757	0.812	0.0363	NA	4	44.86	53	8.14	NA
162	CENPS-CORT									CENPS-CORT_exon_chr1:10451376	0.2243	0.188	-0.0363	NA	1
163	DFFA	378.992	349.849	-0.1122	0.529196	NC	No	No	2	DFFA_exon_chr1:10461702	0.7678	0.7	-0.0678	NA	15	52.28	55.89	3.61	NA
164	DFFA									DFFA_exon_chr1:10463209	0.2322	0.3	0.0678	NA	2	49.11	46.26	-2.85	NA
165	PEX14	218.939	230.419	0.0802	0.948383	NC	No	No	1	PEX14_exon_chr1:10629530	1	1	0	NA	1
166	CASZ1	6.5695	10.1531	0.6409	1	NC	No	No	2	CASZ1_exon_chr1:10640059	0.3116	0.4374	0.1258	NA	3	84.65	54.01	-30.65	NA
167	CASZ1									CASZ1_exon_chr1:10648139	0.6884	0.5626	-0.1258	NA	1
168	TARDBP	14.5771	9.6078	-0.569	1	NC	No	No	1	TARDBP_exon_chr1:11013715	1	1	0	NA	1
169	AL109811.3	302.274	305.912	0.016	1	NC	No	No	1	AL109811.3_exon_chr1:11022123	1	1	0	NA	8	7.17	9.6	2.44	NA
170	AL109811.2	26.4776	21.7648	-0.3242	1	NC	No	No	1	AL109811.2_exon_chr1:11029658	1	1	0	NA	1
171	SRM	478.505	417.165	-0.2058	0.220212	NC	No	No	1	SRM_exon_chr1:11055204	1	1	0	NA	1
172	EXOSC10	306.236	349.022	0.185	0.302847	NC	No	No	1	EXOSC10_exon_chr1:11066748	1	1	0	NA	1
173	EXOSC10-AS1	8.699	11.3662	0.4005	1	NC	No	No	1	EXOSC10-AS1_exon_chr1:11101800	1	1	0	NA	1
174	MTOR	177.097	209.822	0.2441	0.368232	NC	No	No	1	MTOR_exon_chr1:11107500	1	1	0	NA	1
175	UBIAD1	97.4161	100.716	0.0585	1	NC	No	No	1	UBIAD1_exon_chr1:11285643	1	1	0	NA	5	56.86	58.37	1.51	NA
176	DISP3	8.7237	8.429	-0.0651	1	NC	No	No	1	DISP3_exon_chr1:11536323	1	1	0	NA	1
177	FBXO2	491.312	352.541	-0.4888	0.000949948	DOWN	No	No	1	FBXO2_exon_chr1:11648828	1	1	0	NA	1
178	FBXO44	110.96	102.597	-0.1228	1	NC	No	No	1	FBXO44_exon_chr1:11661129	1	1	0	NA	2	66.73	68.46	1.72	NA
179	FBXO6	122.482	120.156	-0.0414	1	NC	No	No	1	FBXO6_exon_chr1:11673614	1	1	0	NA	2	85.15	89.08	3.93	NA
180	MAD2L2	552.245	534.303	-0.0488	0.743812	NC	No	No	1	MAD2L2_exon_chr1:11674816	1	1	0	NA	1
181	DRAXIN	23.5628	31.1502	0.3727	1	NC	No	No	1	DRAXIN_exon_chr1:11719583	1	1	0	NA	2	90.16	87.27	-2.89	NA
182	AGTRAP	362.986	352.833	-0.0467	0.783052	NC	No	No	1	AGTRAP_exon_chr1:11750076	1	1	0	NA	1
183	MTHFR	102.488	105.937	0.0547	1	NC	No	No	1	MTHFR_exon_chr1:11790898	1	1	0	NA	4	88.89	92.86	3.96	NA
184	AL021155.2	9.5073	15.7526	0.7061	1	NC	No	No	1	AL021155.2_exon_chr1:11847433	1	1	0	NA	1
185	KIAA2013	858.543	856.674	-0.0061	0.809735	NC	No	No	1	KIAA2013_exon_chr1:11920332	1	1	0	NA	2	40.52	44.98	4.46	NA
186	PLOD1	1466.02	1534.67	0.0654	0.558052	NC	No	No	1	PLOD1_exon_chr1:11974652	1	1	0	NA	1
187	MFN2	313.698	301.558	-0.0518	1	NC	No	No	1	MFN2_exon_chr1:12011495	1	1	0	NA	1
188	MIIP	606.115	570.003	-0.085	0.617656	NC	No	No	1	MIIP_exon_chr1:12031540	1	1	0	NA	1
189	VPS13D	70.273	74.0798	0.0588	1	NC	No	No	1	VPS13D_exon_chr1:12508892	1	1	0	NA	6	72.39	75.44	3.06	NA
190	DHRS3	420.564	399.525	-0.071	0.710159	NC	No	No	1	DHRS3_exon_chr1:12568424	1	1	0	NA	1
191	PRDM2	63.1256	57.4219	-0.1173	1	NC	No	No	3	PRDM2_exon_chr1:13778417	0.1844	0.0999	-0.0844	NA	1
192	PRDM2									PRDM2_exon_chr1:13786514	0.606	0.6519	0.0459	NA	3	71.14	72.59	1.45	NA
193	PRDM2									PRDM2_exon_chr1:13823158	0.1968	0.1863	-0.0105	NA	3	83.62	88.44	4.82	NA
194	KAZN	140.398	127.322	-0.1449	0.773857	NC	No	No	1	KAZN_exon_chr1:15065629	1	1	0	NA	1
195	TMEM51	40.575	45.8708	0.1694	1	NC	No	No	1	TMEM51_exon_chr1:15219325	1	1	0	NA	1
196	FHAD1	14.1214	14.193	0.0015	1	NC	No	No	3	FHAD1_exon_chr1:15328276	0.1759	0.1979	0.022	NA	3	57.85	22.96	-34.89	NA
197	FHAD1									FHAD1_exon_chr1:15352876	0.7099	0.7104	0.0005	NA	2	35.5	38.64	3.14	NA
198	FHAD1									FHAD1_exon_chr1:15397296	0.1142	0.0917	-0.0225	NA	2	17.03	50.36	33.33	NA
199	EFHD2	367.324	339.927	-0.1112	0.537622	NC	No	No	1	EFHD2_exon_chr1:15428592	1	1	0	NA	3	56.42	58.25	1.83	NA
200	CASP9	23.9162	32.7696	0.4322	1	NC	No	No	1	CASP9_exon_chr1:15494001	1	1	0	NA	1
201	DNAJC16	73.1978	83.8408	0.198	0.985454	NC	No	No	1	DNAJC16_exon_chr1:15567777	1	1	0	NA	1
202	DDI2	78.0168	104.581	0.4195	0.262349	NC	No	No	1	DDI2_exon_chr1:15659836	1	1	0	NA	5	87.76	87.37	-0.39	NA
203	PLEKHM2	306.386	266.851	-0.1947	0.412463	NC	No	No	2	PLEKHM2_exon_chr1:15727013	0.2842	0.2812	-0.003	NA	1
204	PLEKHM2									PLEKHM2_exon_chr1:15733796	0.6957	0.7064	0.0106	NA	1
205	FBLIM1	7.4563	7.7913	0.0529	1	NC	No	No	1	FBLIM1_exon_chr1:15784547	1	1	0	NA	2	16.86	38.22	21.36	NA
206	SPEN	155.933	131.782	-0.2578	0.465644	NC	No	No	2	SPEN_exon_chr1:15928090	0.5332	0.4479	-0.0853	NA	5	40.37	36.3	-4.08	NA
207	SPEN									SPEN_exon_chr1:15939295	0.4087	0.5457	0.1371	NA	1
208	ZBTB17	118.352	141.926	0.2631	0.504207	NC	No	No	1	ZBTB17_exon_chr1:15942901	1	1	0	NA	1
209	CLCNKB	5.4019	6.7273	0.3469	1	NC	No	No	1	CLCNKB_exon_chr1:16056868	1	1	0	NA	1
210	FAM131C	33.729	24.2647	-0.475	1	NC	No	No	1	FAM131C_exon_chr1:16058717	1	1	0	NA	1
211	EPHA2	215.761	281.114	0.3875	0.053899	NC	No	No	1	EPHA2_exon_chr1:16125320	1	1	0	NA	1
212	ARHGEF19	257.489	213.846	-0.2587	0.289566	NC	No	No	1	ARHGEF19_exon_chr1:16198744	1	1	0	NA	2	71.32	65.39	-5.93	NA
213	AL109627.1	10.0415	10.2138	0.0289	1	NC	No	No	1	AL109627.1_exon_chr1:16231335	1	1	0	NA	2	83.54	83.47	-0.07	NA
214	CPLANE2	6.5959	7.6383	0.2341	1	NC	No	No	1	CPLANE2_exon_chr1:16232297	1	1	0	NA	1
215	FBXO42	129.213	111.184	-0.2151	0.737118	NC	No	No	1	FBXO42_exon_chr1:16251785	1	1	0	NA	5	8.49	7.11	-1.38	NA
216	SZRD1	642.652	661.659	0.0414	0.753652	NC	No	No	1	SZRD1_exon_chr1:16395037	1	1	0	NA	6	60.64	54.76	-5.88	NA
217	NECAP2	166.113	196.712	0.2442	0.421375	NC	No	No	2	NECAP2_exon_chr1:16441165	0.1771	0.163	-0.0141	NA	1
218	NECAP2									NECAP2_exon_chr1:16458841	0.8229	0.837	0.0141	NA	1
219	RNU1-1	14.962	21.3894	0.4783	1	NC	No	No	1	RNU1-1_exon_chr1:16514285	1	1	0	NA	2	68.92	72.72	3.8	NA
220	NBPF1	81.9404	72.7631	-0.1803	1	NC	No	No	4	NBPF1_exon_chr1:16564186	0.2495	0.1869	-0.0626	NA	1
221	NBPF1									NBPF1_exon_chr1:16564918	0.2908	0.2692	-0.0216	NA	1
222	NBPF1									NBPF1_exon_chr1:16603049	0.3379	0.382	0.0441	NA	5	72.91	65.5	-7.4	NA
223	NBPF1									NBPF1_exon_chr1:16607691	0.1218	0.1619	0.0401	NA	2	78.07	81	2.94	NA
224	CROCCP2	60.3099	57.0987	-0.0751	1	NC	No	No	2	CROCCP2_exon_chr1:16619103	0.9255	0.9359	0.0104	NA	2	94.41	93.64	-0.76	NA
225	CROCCP2									CROCCP2_exon_chr1:16631109	0.0745	0.0641	-0.0104	NA	2	67.41	64.69	-2.72	NA
226	MST1P2	82.5499	74.2742	-0.1384	1	NC	No	No	1	MST1P2_exon_chr1:16650073	1	1	0	NA	2	46.57	37.44	-9.13	NA
227	EIF1AXP1	78.7356	82.9206	0.073	1	NC	No	No	1	EIF1AXP1_exon_chr1:16686055	1	1	0	NA	4	57.35	67.81	10.46	NA
228	RNU1-4	29.452	29.9346	0.0439	1	NC	No	No	1	RNU1-4_exon_chr1:16740515	1	1	0	NA	2	81.13	82.4	1.28	NA
229	MST1L	61.8795	72.2826	0.2405	1	NC	No	No	1	MST1L_exon_chr1:16757393	1	1	0	NA	1
230	RNU1-2	21.4325	16.6443	-0.3473	1	NC	No	No	1	RNU1-2_exon_chr1:16895979	1	1	0	NA	2	62.83	75.15	12.31	NA
231	CROCC	20.6464	24.9863	0.247	1	NC	No	No	2	CROCC_exon_chr1:16970635	0.1001	0.1056	0.0055	NA	1
232	CROCC									CROCC_exon_chr1:16972359	0.8999	0.8944	-0.0055	NA	1
233	MFAP2	299.215	392.69	0.3929	0.0104764	UP	No	No	1	MFAP2_exon_chr1:16975023	1	1	0	NA	1
234	ATP13A2	333.57	405.853	0.2765	0.168577	NC	No	No	1	ATP13A2_exon_chr1:16986358	1	1	0	NA	1
235	SDHB	617.698	697.266	0.1782	0.174568	NC	No	No	1	SDHB_exon_chr1:17018958	1	1	0	NA	1
236	PADI2	31.4971	28.2338	-0.157	1	NC	No	No	1	PADI2_exon_chr1:17069277	1	1	0	NA	1
237	RCC2	534.685	510.254	-0.0665	0.656963	NC	No	No	1	RCC2_exon_chr1:17409194	1	1	0	NA	1
238	ARHGEF10L	56.5868	62.0679	0.1132	1	NC	No	No	1	ARHGEF10L_exon_chr1:17696847	1	1	0	NA	1
239	ALDH4A1	85.4562	89.4086	0.0571	1	NC	No	No	2	ALDH4A1_exon_chr1:18872957	0.8415	0.823	-0.0184	NA	1
240	ALDH4A1									ALDH4A1_exon_chr1:18882672	0.1585	0.177	0.0184	NA	1
241	IFFO2	43.5368	71.8089	0.72	0.193206	NC	No	No	1	IFFO2_exon_chr1:18908666	1	1	0	NA	1
242	AL137127.1	257.464	232.615	-0.1444	0.745885	NC	No	No	1	AL137127.1_exon_chr1:19075511	1	1	0	NA	1
243	EMC1	344.176	337.599	-0.0194	0.866857	NC	No	No	1	EMC1_exon_chr1:19221916	1	1	0	NA	7	66.39	67.6	1.21	NA
244	MRTO4	1216.35	1156.9	-0.073	0.588772	NC	No	No	1	MRTO4_exon_chr1:19258680	1	1	0	NA	7	42.11	44.77	2.66	NA
245	AKR7L	6.3398	10.0452	0.6659	1	NC	No	No	1	AKR7L_exon_chr1:19267461	1	1	0	NA	2	77.87	85.99	8.11	NA
246	AKR7A3	15.6193	9.5223	-0.6579	1	NC	No	No	1	AKR7A3_exon_chr1:19282892	1	1	0	NA	1
247	AKR7A2	364.975	140.984	-1.3934	5.39819e-18	DOWN	No	No	1	AKR7A2_exon_chr1:19304386	1	1	0	NA	1
248	SLC66A1	113.286	101.847	-0.1396	1	NC	No	No	1	SLC66A1_exon_chr1:19328571	1	1	0	NA	3	94.91	93.96	-0.95	NA
249	CAPZB	1021.03	982.773	-0.052	0.70642	NC	No	No	1	CAPZB_exon_chr1:19339617	1	1	0	NA	3	73.55	72.25	-1.3	NA
250	AL031727.1	1134.45	1040.93	-0.1248	0.292395	NC	No	No	1	AL031727.1_exon_chr1:19608113	1	1	0	NA	1
251	MICOS10-NBL1	1054.78	1012.83	-0.0588	0.65176	NC	No	No	2	MICOS10-NBL1_exon_chr1:19626386	0.6644	0.6363	-0.0281	NA	1
252	MICOS10-NBL1									MICOS10-NBL1_exon_chr1:19656865	0.3356	0.3637	0.0281	NA	2	93.29	88.73	-4.56	NA
253	TMCO4	272.323	235.315	-0.2037	0.450935	NC	No	No	1	TMCO4_exon_chr1:19683444	1	1	0	NA	1
254	OTUD3	36.2161	40.0256	0.1491	1	NC	No	No	1	OTUD3_exon_chr1:19907569	1	1	0	NA	3	96.7	82.72	-13.98	NA
255	CAMK2N1	272.136	267.226	-0.0277	1	NC	No	No	1	CAMK2N1_exon_chr1:20483719	1	1	0	NA	3	30.84	29.61	-1.22	NA
256	MUL1	217.986	194.107	-0.1625	0.647382	NC	No	No	1	MUL1_exon_chr1:20501419	1	1	0	NA	1
257	CDA	41.5505	45.3611	0.1286	1	NC	No	No	1	CDA_exon_chr1:20618451	1	1	0	NA	1
258	DDOST	2367.24	2066.69	-0.1965	0.0567857	NC	No	No	1	DDOST_exon_chr1:20652727	1	1	0	NA	3	41.71	39.81	-1.9	NA
259	PINK1	106.102	101.271	-0.0759	1	NC	No	No	1	PINK1_exon_chr1:20650433	1	1	0	NA	3	69.8	68.85	-0.95	NA
260	KIF17	5.7586	6.5561	0.2688	1	NC	No	No	1	KIF17_exon_chr1:20664762	1	1	0	NA	1
261	SH2D5	16.4847	18.923	0.2057	1	NC	No	No	1	SH2D5_exon_chr1:20721995	1	1	0	NA	1
262	HP1BP3	430.006	426.046	-0.0125	0.864069	NC	No	No	3	HP1BP3_exon_chr1:20745091	0.7302	0.7158	-0.0144	NA	3	85.55	85.13	-0.42	NA
263	HP1BP3									HP1BP3_exon_chr1:20775005	0.1744	0.1913	0.0169	NA	1
264	HP1BP3									HP1BP3_exon_chr1:20776750	0.0944	0.0884	-0.0061	NA	3	12.66	9.28	-3.38	NA
265	EIF4G3	322.008	317.161	-0.0252	0.843326	NC	No	No	3	EIF4G3_exon_chr1:20807500	0.8222	0.8235	0.0013	NA	6	58	60.76	2.75	NA
266	EIF4G3									EIF4G3_exon_chr1:20862332	0.1068	0.0728	-0.034	NA	1
267	EIF4G3									EIF4G3_exon_chr1:21176358	0.0453	0.0554	0.0101	NA	2	80.61	79.37	-1.25	NA
268	ECE1	713.162	641.749	-0.1503	0.242792	NC	No	No	1	ECE1_exon_chr1:21220131	1	1	0	NA	3	84.47	83.65	-0.82	NA
269	NBPF3	9.5371	7.939	-0.2035	1	NC	No	No	1	NBPF3_exon_chr1:21483142	1	1	0	NA	1
270	RAP1GAP	66.5746	77.4671	0.2076	0.854865	NC	No	No	1	RAP1GAP_exon_chr1:21597264	1	1	0	NA	1
271	USP48	720.409	624.503	-0.2046	0.102655	NC	No	No	4	USP48_exon_chr1:21679439	0.1666	0.1774	0.0109	NA	4	34.12	33.18	-0.94	NA
272	USP48									USP48_exon_chr1:21715457	0.2405	0.2013	-0.0392	NA	1
273	USP48									USP48_exon_chr1:21721166	0.5223	0.5146	-0.0077	NA	1
274	USP48									USP48_exon_chr1:21728719	0.0551	0.0895	0.0344	NA	1
275	HSPG2	12.7574	15.1783	0.2568	1	NC	No	No	1	HSPG2_exon_chr1:21823488	1	1	0	NA	2	87.02	85.98	-1.04	NA
276	AL031281.2	45.6978	43.1637	-0.098	1	NC	No	No	1	AL031281.2_exon_chr1:22030279	1	1	0	NA	1
277	CDC42	901.04	979.072	0.1203	0.312387	NC	No	No	1	CDC42_exon_chr1:22091427	1	1	0	NA	6	82.43	82.15	-0.28	NA
278	WNT4	7.382	9.057	0.2541	1	NC	No	No	2	WNT4_exon_chr1:22120517	0.8894	0.9264	0.0371	NA	3	13.56	6.78	-6.78	NA
279	WNT4									WNT4_exon_chr1:22127481	0.1106	0.0736	-0.0371	NA	1
280	ZBTB40	105.207	116.985	0.1661	0.83467	NC	No	No	1	ZBTB40_exon_chr1:22526201	1	1	0	NA	7	93.94	91.22	-2.72	NA
281	EPHB2	377.101	361.498	-0.0674	0.702356	NC	No	No	1	EPHB2_exon_chr1:22912443	1	1	0	NA	6	40.77	41.24	0.47	NA
282	KDM1A	167.246	186.17	0.1666	0.670574	NC	No	No	2	KDM1A_exon_chr1:23069060	0.064	0.0424	-0.0216	NA	1
283	KDM1A									KDM1A_exon_chr1:23080872	0.9262	0.9448	0.0186	NA	1
284	AL031428.1	40.3488	49.6486	0.3205	1	NC	No	No	1	AL031428.1_exon_chr1:23089053	1	1	0	NA	2	49.87	43.65	-6.22	NA
285	LUZP1	559.499	575.077	0.0414	0.838223	NC	No	No	1	LUZP1_exon_chr1:23094380	1	1	0	NA	8	62.41	60.02	-2.39	NA
286	HTR1D	6.9518	12.3765	0.792	1	NC	No	No	1	HTR1D_exon_chr1:23194729	1	1	0	NA	3	83.46	84.79	1.33	NA
287	HNRNPR	698.124	648.379	-0.1081	0.465644	NC	No	No	2	HNRNPR_exon_chr1:23311066	0.7431	0.7389	-0.0041	NA	7	58.05	59.37	1.32	NA
288	HNRNPR									HNRNPR_exon_chr1:23311322	0.2197	0.2231	0.0034	NA	2	49.5	48.17	-1.34	NA
289	ZNF436	19.8083	23.1355	0.2377	1	NC	No	No	1	ZNF436_exon_chr1:23363221	1	1	0	NA	2	86.64	87.51	0.87	NA
290	Y	20.5636	18.3738	-0.1629	1	NC	No	No	4	Y_exon_chr1:23369198	0.1209	0.0729	-0.048	NA	1
291	Y									Y_exon_chr2:200863247	0.3125	0.3547	0.0422	NA	1
292	Y									Y_exon_chr3:125528349	0.3045	0.2487	-0.0558	NA	1
293	Y									Y_exon_chr9:37160136	0.1223	0.152	0.0297	NA	1
294	TCEA3	181.104	138.806	-0.3866	0.0931446	NC	No	No	1	TCEA3_exon_chr1:23381474	1	1	0	NA	2	17.89	22.1	4.2	NA
295	ASAP3	18.3129	19.5176	0.1143	1	NC	No	No	1	ASAP3_exon_chr1:23429930	1	1	0	NA	2	94.24	80.1	-14.14	NA
296	E2F2	27.5693	22.397	-0.2652	1	NC	No	No	1	E2F2_exon_chr1:23510148	1	1	0	NA	1
297	ID3	443.611	519.986	0.2238	0.124583	NC	No	No	1	ID3_exon_chr1:23559075	1	1	0	NA	1
298	RPL11	18882.4	18022.4	-0.0673	0.359235	NC	No	No	1	RPL11_exon_chr1:23696343	1	1	0	NA	1
299	ELOA	195.171	265.545	0.44	0.0248101	UP	No	No	2	ELOA_exon_chr1:23750844	0.3509	0.3316	-0.0193	NA	3	92.88	91.73	-1.16	NA
300	ELOA									ELOA_exon_chr1:23759511	0.6491	0.6684	0.0193	NA	3	68.95	64.01	-4.94	NA
301	ELOA-AS1	16.7928	13.9598	-0.3013	1	NC	No	No	1	ELOA-AS1_exon_chr1:23761151	1	1	0	NA	2	68.06	73.66	5.59	NA
302	PITHD1	65.0041	70.8836	0.1138	1	NC	No	No	1	PITHD1_exon_chr1:23787274	1	1	0	NA	2	92.42	95.89	3.47	NA
303	GALE	383.416	397.479	0.0489	0.785168	NC	No	No	1	GALE_exon_chr1:23796782	1	1	0	NA	1
304	LYPLA2	153.992	187.982	0.2797	0.309218	NC	No	No	1	LYPLA2_exon_chr1:23794223	1	1	0	NA	1
305	HMGCL	124.876	105.08	-0.2469	0.562495	NC	No	No	1	HMGCL_exon_chr1:23802564	1	1	0	NA	1
306	FUCA1	44.5635	43.9052	-0.0236	1	NC	No	No	1	FUCA1_exon_chr1:23845855	1	1	0	NA	1
307	AL590609.2	7.912	6.4691	-0.2961	1	NC	No	No	1	AL590609.2_exon_chr1:23949383	1	1	0	NA	1
308	PNRC2	539.5	524.457	-0.0382	0.792909	NC	No	No	1	PNRC2_exon_chr1:23961439	1	1	0	NA	10	71.66	71.85	0.19	NA
309	SRSF10	723.367	783.866	0.1165	0.375597	NC	No	No	1	SRSF10_exon_chr1:23972012	1	1	0	NA	15	46.27	47.56	1.29	NA
310	MYOM3	33.0445	22.1457	-0.58	1	NC	No	No	1	MYOM3_exon_chr1:24057627	1	1	0	NA	2	42.5	38.91	-3.59	NA
311	IL22RA1	23.1079	21.3038	-0.1549	1	NC	No	No	1	IL22RA1_exon_chr1:24121737	1	1	0	NA	1
312	IFNLR1	18.5093	21.3732	0.2063	1	NC	No	No	1	IFNLR1_exon_chr1:24157891	1	1	0	NA	2	96.99	91.66	-5.33	NA
313	STPG1	29.1157	23.7318	-0.2946	1	NC	No	No	3	STPG1_exon_chr1:24358619	0.8135	0.6659	-0.1476	NA	1
314	STPG1									STPG1_exon_chr1:24369839	0.0565	0.1526	0.0961	NA	2	33.59	35.38	1.79	NA
315	STPG1									STPG1_exon_chr1:24391679	0.0445	0.1192	0.0747	NA	2	22.82	39.01	16.19	NA
316	NIPAL3	71.2987	53.8484	-0.4095	0.691583	NC	No	No	2	NIPAL3_exon_chr1:24464025	0.5703	0.6535	0.0833	NA	1
317	NIPAL3									NIPAL3_exon_chr1:24468985	0.4297	0.3465	-0.0833	NA	5	89.96	89.14	-0.82	NA
318	RCAN3	88.23	85.3234	-0.0527	1	NC	No	No	2	RCAN3_exon_chr1:24514313	0.0607	0.0452	-0.0155	NA	1
319	RCAN3									RCAN3_exon_chr1:24535092	0.9393	0.9548	0.0155	NA	6	58.59	52.66	-5.92	NA
320	NCMAP	11.9936	22.6014	0.9402	1	NC	No	No	1	NCMAP_exon_chr1:24605605	1	1	0	NA	2	88.9	91.6	2.69	NA
321	SRRM1	3855.96	3615.3	-0.0915	0.45927	NC	No	No	4	SRRM1_exon_chr1:24646666	0.0961	0.0932	-0.0029	NA	1
322	SRRM1									SRRM1_exon_chr1:24649970	0.5793	0.5802	0.0009	NA	1
323	SRRM1									SRRM1_exon_chr1:24669122	0.0535	0.0502	-0.0033	NA	1
324	SRRM1									SRRM1_exon_chr1:24672181	0.2432	0.2443	0.0011	NA	1
325	CLIC4	356.229	373.399	0.0646	0.718543	NC	No	No	1	CLIC4_exon_chr1:24840772	1	1	0	NA	10	87.13	84.25	-2.88	NA
326	RUNX3	98.4181	76.2511	-0.3643	0.418087	NC	No	No	1	RUNX3_exon_chr1:24902666	1	1	0	NA	2	47.07	51.99	4.91	NA
327	SYF2	699.277	662.782	-0.0795	0.549409	NC	No	No	3	SYF2_exon_chr1:25223431	0.221	0.2339	0.0128	NA	5	68.39	66.78	-1.61	NA
328	SYF2									SYF2_exon_chr1:25228235	0.1165	0.1066	-0.0099	NA	1
329	SYF2									SYF2_exon_chr1:25229123	0.6577	0.655	-0.0028	NA	1
330	RSRP1	93.1164	98.2893	0.0739	1	NC	No	No	1	RSRP1_exon_chr1:25242705	1	1	0	NA	1
331	TMEM50A	483.627	570.139	0.2408	0.0921627	NC	No	No	1	TMEM50A_exon_chr1:25360659	1	1	0	NA	7	16.63	15.22	-1.41	NA
332	MACO1	71.1367	86.9061	0.291	0.698383	NC	No	No	2	MACO1_exon_chr1:25485612	0.3831	0.4148	0.0317	NA	1
333	MACO1									MACO1_exon_chr1:25498263	0.6112	0.5779	-0.0333	NA	6	24.45	25.25	0.8	NA
334	LDLRAP1	107.48	109.472	0.0082	1	NC	No	No	1	LDLRAP1_exon_chr1:25566847	1	1	0	NA	1
335	AL606491.1	16.9669	14.0895	-0.3048	1	NC	No	No	1	AL606491.1_exon_chr1:25590168	1	1	0	NA	1
336	MAN1C1	7.4101	9.5457	0.3141	1	NC	No	No	1	MAN1C1_exon_chr1:25783662	1	1	0	NA	1
337	SELENON	561.958	476.418	-0.2427	0.149017	NC	No	No	1	SELENON_exon_chr1:25815547	1	1	0	NA	1
338	MTFR1L	261.933	253.279	-0.0464	1	NC	No	No	1	MTFR1L_exon_chr1:25831920	1	1	0	NA	3	92.65	93.12	0.47	NA
339	AUNIP	136.799	148.693	0.1206	0.865555	NC	No	No	1	AUNIP_exon_chr1:25835846	1	1	0	NA	2	39.68	29.6	-10.08	NA
340	PAQR7	297.248	208.441	-0.5231	0.00180822	DOWN	No	No	1	PAQR7_exon_chr1:25863861	1	1	0	NA	1
341	STMN1	1327.54	1177.82	-0.1705	0.1261	NC	No	No	1	STMN1_exon_chr1:25901087	1	1	0	NA	8	20.44	19.09	-1.36	NA
342	PAFAH2	37.8881	27.4885	-0.45	1	NC	No	No	1	PAFAH2_exon_chr1:25962083	1	1	0	NA	2	93.2	94.44	1.24	NA
343	FAM110D	10.3001	7.9736	-0.3032	1	NC	No	No	1	FAM110D_exon_chr1:26161211	1	1	0	NA	2	19.23	17.2	-2.03	NA
344	ZNF593	670.962	699.726	0.06	0.654301	NC	No	No	1	ZNF593_exon_chr1:26170417	1	1	0	NA	1
345	CNKSR1	62.494	64.9123	0.0452	1	NC	No	No	1	CNKSR1_exon_chr1:26189278	1	1	0	NA	1
346	CEP85	127.228	136.567	0.1057	0.905111	NC	No	No	2	CEP85_exon_chr1:26268482	0.2615	0.267	0.0055	NA	1
347	CEP85									CEP85_exon_chr1:26277132	0.7385	0.733	-0.0055	NA	1
348	SH3BGRL3	992.701	961.483	-0.049	0.710022	NC	No	No	1	SH3BGRL3_exon_chr1:26280764	1	1	0	NA	1
349	CRYBG2	17.7795	19.0307	0.0977	1	NC	No	No	1	CRYBG2_exon_chr1:26322056	1	1	0	NA	1
350	DHDDS	62.7475	66.6212	0.0836	1	NC	No	No	2	DHDDS_exon_chr1:26447558	0.1903	0.1275	-0.0628	NA	2	65.56	63.47	-2.08	NA
351	DHDDS									DHDDS_exon_chr1:26468891	0.8097	0.8677	0.058	NA	5	90.47	85.77	-4.7	NA
352	AL513365.1	1273.96	1333.38	0.0635	0.61281	NC	No	No	1	AL513365.1_exon_chr1:26455187	1	1	0	NA	1
353	HMGN2	2027.42	1952.32	-0.0531	0.65886	NC	No	No	1	HMGN2_exon_chr1:26474571	1	1	0	NA	1
354	RPS6KA1	162.685	184.462	0.1842	0.74281	NC	No	No	1	RPS6KA1_exon_chr1:26574078	1	1	0	NA	1
355	ARID1A	110.343	96.7131	-0.208	0.829187	NC	No	No	1	ARID1A_exon_chr1:26778098	1	1	0	NA	1
356	PIGV	59.097	49.5736	-0.244	1	NC	No	No	1	PIGV_exon_chr1:26797562	1	1	0	NA	3	73.64	62.76	-10.88	NA
357	ZDHHC18	216.233	242.509	0.1572	0.661424	NC	No	No	1	ZDHHC18_exon_chr1:26853725	1	1	0	NA	1
358	SFN	665.439	582.893	-0.1941	0.238406	NC	No	No	1	SFN_exon_chr1:26863148	1	1	0	NA	1
359	GPN2	96.8844	80.3777	-0.2789	0.602461	NC	No	No	1	GPN2_exon_chr1:26879749	1	1	0	NA	3	42.79	38.74	-4.05	NA
360	GPATCH3	177.125	175.609	0.0014	1	NC	No	No	1	GPATCH3_exon_chr1:26891226	1	1	0	NA	1
361	NUDC	3576.42	3513.7	-0.0243	0.76967	NC	No	No	1	NUDC_exon_chr1:26946129	1	1	0	NA	3	19.4	17.66	-1.74	NA
362	KDF1	61.8343	64.4294	0.0349	1	NC	No	No	1	KDF1_exon_chr1:26950151	1	1	0	NA	1
363	RPL12P13	139.395	126.987	-0.1347	0.896859	NC	No	No	1	RPL12P13_exon_chr1:26980164	1	1	0	NA	1
364	TRNP1	343.048	387.507	0.1671	0.437035	NC	No	No	1	TRNP1_exon_chr1:26999846	1	1	0	NA	7	86.82	86.14	-0.68	NA
365	TENT5B	39.9263	34.4507	-0.2156	1	NC	No	No	1	TENT5B_exon_chr1:27006957	1	1	0	NA	1
366	SLC9A1	119.403	144.587	0.2751	0.444534	NC	No	No	1	SLC9A1_exon_chr1:27100644	1	1	0	NA	1
367	NPM1P39	41.7334	39.5946	-0.0557	1	NC	No	No	1	NPM1P39_exon_chr1:27206929	1	1	0	NA	1
368	WDTC1	172.89	151.918	-0.1893	0.710159	NC	No	No	1	WDTC1_exon_chr1:27306185	1	1	0	NA	1
369	TMEM222	154.161	139.048	-0.1467	0.814182	NC	No	No	1	TMEM222_exon_chr1:27334150	1	1	0	NA	1
370	SYTL1	139.585	96.7496	-0.5217	0.085984	NC	No	No	1	SYTL1_exon_chr1:27353712	1	1	0	NA	1
371	MAP3K6	248.102	273.737	0.1439	0.679788	NC	No	No	1	MAP3K6_exon_chr1:27355469	1	1	0	NA	1
372	CD164L2	35.5333	19.8864	-0.8744	1	NC	No	No	1	CD164L2_exon_chr1:27380195	1	1	0	NA	1
373	GPR3	15.6747	15.4309	-0.0407	1	NC	No	No	1	GPR3_exon_chr1:27393793	1	1	0	NA	1
374	WASF2	239.122	300.892	0.3268	0.125604	NC	No	No	1	WASF2_exon_chr1:27408346	1	1	0	NA	1
375	AHDC1	11.1622	20.2976	0.8372	1	NC	No	No	1	AHDC1_exon_chr1:27534916	1	1	0	NA	3	54.37	47.38	-6.98	NA
376	AL031729.1	24.7006	20.4565	-0.2594	1	NC	No	No	1	AL031729.1_exon_chr1:27649418	1	1	0	NA	1
377	IFI6	89.8336	98.5805	0.1221	1	NC	No	No	1	IFI6_exon_chr1:27666475	1	1	0	NA	1
378	FAM76A	42.2718	33.7439	-0.2999	1	NC	No	No	1	FAM76A_exon_chr1:27760494	1	1	0	NA	2	72.66	77.73	5.07	NA
379	RNU6-1245P	129.44	134.459	0.0639	1	NC	No	No	1	RNU6-1245P_exon_chr1:27822230	1	1	0	NA	5	49.49	37.76	-11.73	NA
380	PPP1R8	177.878	191.907	0.1054	0.868284	NC	No	No	1	PPP1R8_exon_chr1:27850092	1	1	0	NA	5	32.49	34.62	2.13	NA
381	THEMIS2	30.134	28.9064	-0.0709	1	NC	No	No	1	THEMIS2_exon_chr1:27885866	1	1	0	NA	1
382	RPA2	1549.27	1431.07	-0.1124	0.297663	NC	No	No	1	RPA2_exon_chr1:27892247	1	1	0	NA	1
383	SMPDL3B	50.4723	40.1719	-0.3452	1	NC	No	No	2	SMPDL3B_exon_chr1:27955683	0.1149	0.0656	-0.0493	NA	2	95.91	45.5	-50.41	NA
384	SMPDL3B									SMPDL3B_exon_chr1:27958475	0.8851	0.9344	0.0493	NA	1
385	XKR8	56.813	78.3341	0.4796	0.531711	NC	No	No	1	XKR8_exon_chr1:27966502	1	1	0	NA	1
386	EYA3	151.56	126.726	-0.2366	0.575684	NC	No	No	1	EYA3_exon_chr1:27974546	1	1	0	NA	1
387	SPCS2P4	481.721	491.946	0.0267	0.83467	NC	No	No	1	SPCS2P4_exon_chr1:28096422	1	1	0	NA	1
388	DNAJC8	843.986	883.865	0.0655	0.621993	NC	No	No	3	DNAJC8_exon_chr1:28201370	0.4611	0.4645	0.0035	NA	3	57.29	55.63	-1.66	NA
389	DNAJC8									DNAJC8_exon_chr1:28208809	0.4182	0.4334	0.0153	NA	1
390	DNAJC8									DNAJC8_exon_chr1:28210637	0.0962	0.0777	-0.0185	NA	1
391	ATP5IF1	653.141	553.594	-0.2383	0.108488	NC	No	No	1	ATP5IF1_exon_chr1:28236360	1	1	0	NA	2	81.77	83.86	2.09	NA
392	SESN2	99.6575	107.083	0.1072	1	NC	No	No	1	SESN2_exon_chr1:28280715	1	1	0	NA	1
393	MED18	267.458	284.907	0.0967	0.825781	NC	No	No	1	MED18_exon_chr1:28334416	1	1	0	NA	1
394	PHACTR4	90.1496	84.3775	-0.08	1	NC	No	No	2	PHACTR4_exon_chr1:28493014	0.2199	0.2345	0.0146	NA	1
395	PHACTR4									PHACTR4_exon_chr1:28496533	0.7291	0.6793	-0.0498	NA	7	72.09	72.32	0.22	NA
396	RCC1	1662.34	1585.96	-0.0663	0.554944	NC	No	No	2	RCC1_exon_chr1:28508558	0.2161	0.2165	0.0004	NA	1
397	RCC1									RCC1_exon_chr1:28537831	0.7826	0.7812	-0.0014	NA	7	22.94	22.44	-0.5	NA
398	TRNAU1AP	218.246	257.772	0.2443	0.334639	NC	No	No	1	TRNAU1AP_exon_chr1:28577499	1	1	0	NA	2	17.35	18.48	1.13	NA
399	SNHG12	1796.24	1842.64	0.0394	0.663136	NC	No	No	1	SNHG12_exon_chr1:28583132	1	1	0	NA	1
400	TAF12	117.782	102.085	-0.2063	0.738374	NC	No	No	1	TAF12_exon_chr1:28603574	1	1	0	NA	3	77.71	81.75	4.03	NA
401	AL360012.1	12.4271	14.5435	0.2342	1	NC	No	No	1	AL360012.1_exon_chr1:28648192	1	1	0	NA	4	64.23	65.02	0.78	NA
402	GMEB1	55.1854	50.899	-0.0961	1	NC	No	No	1	GMEB1_exon_chr1:28714072	1	1	0	NA	10	70.11	73.52	3.41	NA
403	YTHDF2	327.232	326.756	-0.0045	0.906504	NC	No	No	1	YTHDF2_exon_chr1:28768928	1	1	0	NA	1
404	EPB41	200.569	171.569	-0.2223	0.446043	NC	No	No	3	EPB41_exon_chr1:29053103	0.068	0.0752	0.0072	NA	1
405	EPB41									EPB41_exon_chr1:29058588	0.1078	0.0832	-0.0246	NA	1
406	EPB41									EPB41_exon_chr1:29116818	0.8221	0.8417	0.0196	NA	1
407	TMEM200B	122.07	83.3539	-0.5507	0.0601835	NC	No	No	1	TMEM200B_exon_chr1:29121848	1	1	0	NA	1
408	SRSF4	578.229	564.067	-0.0382	0.774377	NC	No	No	1	SRSF4_exon_chr1:29149226	1	1	0	NA	7	40.57	45.77	5.19	NA
409	MECR	72.4793	60.4419	-0.2525	1	NC	No	No	1	MECR_exon_chr1:29194179	1	1	0	NA	3	9.48	11.11	1.62	NA
410	PTPRU	179.56	182.77	0.0296	1	NC	No	No	1	PTPRU_exon_chr1:29325598	1	1	0	NA	1
411	SDC3	37.2822	30.5032	-0.2754	1	NC	No	No	1	SDC3_exon_chr1:30873377	1	1	0	NA	1
412	PUM1	142.952	182.567	0.3492	0.184163	NC	No	No	1	PUM1_exon_chr1:30933342	1	1	0	NA	5	94.71	91.38	-3.33	NA
413	NKAIN1	14.4303	11.7195	-0.2802	1	NC	No	No	1	NKAIN1_exon_chr1:31181712	1	1	0	NA	1
414	SNRNP40	156.738	188.903	0.2681	0.309218	NC	No	No	1	SNRNP40_exon_chr1:31260121	1	1	0	NA	2	38.39	36.43	-1.95	NA
415	ZCCHC17	521.595	542.293	0.0569	0.737118	NC	No	No	3	ZCCHC17_exon_chr1:31337174	0.1637	0.1591	-0.0046	NA	1
416	ZCCHC17									ZCCHC17_exon_chr1:31348828	0.6852	0.6605	-0.0247	NA	1
417	ZCCHC17									ZCCHC17_exon_chr1:31364031	0.1503	0.1804	0.0301	NA	1
418	SERINC2	85.117	72.1845	-0.2495	0.847293	NC	No	No	1	SERINC2_exon_chr1:31434063	1	1	0	NA	1
419	TINAGL1	84.2772	91.2122	0.1163	1	NC	No	No	1	TINAGL1_exon_chr1:31586838	1	1	0	NA	1
420	PEF1	279.546	251.457	-0.1461	0.647084	NC	No	No	1	PEF1_exon_chr1:31630842	1	1	0	NA	1
421	COL16A1	15.3939	10.3435	-0.5816	1	NC	No	No	1	COL16A1_exon_chr1:31652853	1	1	0	NA	2	54.58	62.04	7.46	NA
422	ADGRB2	96.5378	131.377	0.4322	0.27264	NC	No	No	1	ADGRB2_exon_chr1:31728081	1	1	0	NA	1
423	PTP4A2	2090.21	2087.68	-0.0018	0.871938	NC	No	No	1	PTP4A2_exon_chr1:31908960	1	1	0	NA	6	34.89	27.68	-7.21	NA
424	KHDRBS1	1075.56	982.796	-0.1305	0.296846	NC	No	No	1	KHDRBS1_exon_chr1:32042526	1	1	0	NA	9	81.9	83.11	1.21	NA
425	TMEM39B	263.077	256.286	-0.0287	1	NC	No	No	1	TMEM39B_exon_chr1:32102430	1	1	0	NA	1
426	AL049795.2	478.285	536.587	0.1692	0.265758	NC	No	No	1	AL049795.2_exon_chr1:32170706	1	1	0	NA	7	77.01	77.94	0.93	NA
427	TXLNA	174.327	175.521	-0.0016	1	NC	No	No	1	TXLNA_exon_chr1:32194901	1	1	0	NA	1
428	CCDC28B	57.0162	56.7719	0.0002	1	NC	No	No	1	CCDC28B_exon_chr1:32204597	1	1	0	NA	1
429	IQCC	175.535	137	-0.3466	0.212112	NC	No	No	1	IQCC_exon_chr1:32207239	1	1	0	NA	1
430	TMEM234	28.9332	38.2422	0.3713	1	NC	No	No	2	TMEM234_exon_chr1:32215049	0.1579	0.2761	0.1182	NA	3	55.91	83.33	27.43	NA
431	TMEM234									TMEM234_exon_chr1:32217427	0.8421	0.7239	-0.1182	NA	1
432	EIF3I	2240	2187.34	-0.0335	0.737118	NC	No	No	1	EIF3I_exon_chr1:32230926	1	1	0	NA	1
433	MTMR9LP	21.5101	17.3524	-0.3592	1	NC	No	No	1	MTMR9LP_exon_chr1:32231969	1	1	0	NA	1
434	HDAC1	557.36	588.368	0.0749	0.646224	NC	No	No	1	HDAC1_exon_chr1:32333016	1	1	0	NA	1
435	MARCKSL1	266.145	266.857	0.0092	1	NC	No	No	1	MARCKSL1_exon_chr1:32335097	1	1	0	NA	4	94.21	94.02	-0.18	NA
436	FAM229A	77.2366	64.2371	-0.261	0.744595	NC	No	No	1	FAM229A_exon_chr1:32364278	1	1	0	NA	1
437	BSDC1	34.725	37.1639	0.0864	1	NC	No	No	1	BSDC1_exon_chr1:32368550	1	1	0	NA	3	53.72	49.61	-4.11	NA
438	AL033529.1	76.8424	76.1225	-0.0026	1	NC	No	No	2	AL033529.1_exon_chr1:32485100	0.1508	0.1343	-0.0165	NA	6	42.45	44.19	1.74	NA
439	AL033529.1									AL033529.1_exon_chr1:32600086	0.8492	0.8657	0.0165	NA	11	71.68	75.22	3.54	NA
440	ZBTB8OS	448.879	425.005	-0.0779	0.630976	NC	No	No	1	ZBTB8OS_exon_chr1:32621948	1	1	0	NA	3	8.47	9.47	1	NA
441	RBBP4	1139.53	853.159	-0.4132	1.00535e-05	DOWN	No	No	1	RBBP4_exon_chr1:32679634	1	1	0	NA	5	16.86	15.91	-0.95	NA
442	KIAA1522	218.06	213.568	-0.0154	1	NC	No	No	1	KIAA1522_exon_chr1:32772864	1	1	0	NA	1
443	YARS	1305.38	1360.12	0.0596	0.582153	NC	No	No	1	YARS_exon_chr1:32776091	1	1	0	NA	3	95.55	94.9	-0.65	NA
444	S100PBP	45.2173	43.6321	-0.0378	1	NC	No	No	1	S100PBP_exon_chr1:32855923	1	1	0	NA	4	58.46	59.31	0.85	NA
445	TMEM54	406.123	438.374	0.1073	0.554944	NC	No	No	1	TMEM54_exon_chr1:32894879	1	1	0	NA	1
446	RNF19B	77.8358	91.6408	0.2556	0.805406	NC	No	No	1	RNF19B_exon_chr1:32937309	1	1	0	NA	1
447	AK2	1185.51	1139.95	-0.0547	0.646841	NC	No	No	1	AK2_exon_chr1:33013402	1	1	0	NA	9	63.23	59.85	-3.38	NA
448	AZIN2	15.289	8.0054	-0.9456	1	NC	No	No	1	AZIN2_exon_chr1:33117901	1	1	0	NA	1
449	AL662907.1	5.9336	6.0206	0.0421	1	NC	No	No	1	AL662907.1_exon_chr1:33143230	1	1	0	NA	1
450	TRIM62	41.6155	42.8066	0.0415	1	NC	No	No	1	TRIM62_exon_chr1:33147727	1	1	0	NA	1
451	ZNF362	68.3856	70.8112	0.0437	1	NC	No	No	1	ZNF362_exon_chr1:33298929	1	1	0	NA	2	62.1	65.36	3.26	NA
452	PHC2	862.201	757.957	-0.1855	0.235694	NC	No	No	1	PHC2_exon_chr1:33325019	1	1	0	NA	1
453	ZSCAN20	9.1564	9.0031	0.0015	1	NC	No	No	1	ZSCAN20_exon_chr1:33494217	1	1	0	NA	3	5.78	16.04	10.26	NA
454	GJB5	38.501	30.92	-0.3153	1	NC	No	No	1	GJB5_exon_chr1:34757306	1	1	0	NA	1
455	GJB3	69.7727	81.2679	0.2152	0.81954	NC	No	No	1	GJB3_exon_chr1:34784737	1	1	0	NA	1
456	SMIM12	281.111	263.138	-0.1063	0.798759	NC	No	No	1	SMIM12_exon_chr1:34855982	1	1	0	NA	4	6.36	7.9	1.54	NA
457	AC114490.2	42.5372	41.8167	-0.0101	1	NC	No	No	1	AC114490.2_exon_chr1:34982119	1	1	0	NA	1
458	ZMYM6	42.5816	47.4782	0.1315	1	NC	No	No	2	ZMYM6_exon_chr1:34990311	0.7505	0.762	0.0115	NA	4	21.12	28.98	7.86	NA
459	ZMYM6									ZMYM6_exon_chr1:35019602	0.2495	0.238	-0.0115	NA	3	95.61	96.7	1.1	NA
460	ZMYM1	42.4015	42.6918	0.0008	1	NC	No	No	1	ZMYM1_exon_chr1:35112976	1	1	0	NA	5	81.39	79.24	-2.15	NA
461	SFPQ	2032.67	1968.7	-0.0441	0.660219	NC	No	No	3	SFPQ_exon_chr1:35176474	0.5198	0.5087	-0.0111	NA	1
462	SFPQ									SFPQ_exon_chr1:35184593	0.2081	0.2491	0.041	NA	9	77.85	78.7	0.84	NA
463	SFPQ									SFPQ_exon_chr1:35189382	0.2587	0.2278	-0.0309	NA	1
464	RPL5P4	3686.73	3155.95	-0.2236	0.0549103	NC	No	No	1	RPL5P4_exon_chr1:35350721	1	1	0	NA	1
465	ZMYM4	283.508	294.421	0.0529	1	NC	No	No	1	ZMYM4_exon_chr1:35419469	1	1	0	NA	9	40.28	36.19	-4.09	NA
466	KIAA0319L	240.403	214.631	-0.1549	0.699147	NC	No	No	2	KIAA0319L_exon_chr1:35435597	0.9483	0.9479	-0.0004	NA	1
467	KIAA0319L									KIAA0319L_exon_chr1:35451776	0.0517	0.0521	0.0004	NA	1
468	NCDN	82.7513	82.4403	0.0006	1	NC	No	No	1	NCDN_exon_chr1:35565226	1	1	0	NA	2	7.43	8.96	1.53	NA
469	AC004865.2	12.3709	10.1074	-0.316	1	NC	No	No	1	AC004865.2_exon_chr1:35569919	1	1	0	NA	1
470	TFAP2E	8.6239	12.4194	0.5297	1	NC	No	No	1	TFAP2E_exon_chr1:35594393	1	1	0	NA	1
471	PSMB2	1275.2	1019.12	-0.3188	0.0101081	NC	No	No	1	PSMB2_exon_chr1:35603374	1	1	0	NA	10	42.78	35.6	-7.17	NA
472	C1orf216	162.518	123.284	-0.4096	0.107339	NC	No	No	1	C1orf216_exon_chr1:35716326	1	1	0	NA	1
473	CLSPN	1476.39	1656.53	0.1666	0.486939	NC	No	No	4	CLSPN_exon_chr1:35736606	0.0919	0.1014	0.0095	NA	6	56.69	62.39	5.7	NA
474	CLSPN									CLSPN_exon_chr1:35749811	0.2462	0.2252	-0.0211	NA	1
475	CLSPN									CLSPN_exon_chr1:35751506	0.3432	0.3201	-0.0231	NA	1
476	CLSPN									CLSPN_exon_chr1:35764714	0.3043	0.3428	0.0386	NA	4	95.42	93.6	-1.81	NA
477	AGO4	16.9166	16.7589	-0.0486	1	NC	No	No	1	AGO4_exon_chr1:35853487	1	1	0	NA	6	90.11	80.27	-9.84	NA
478	AGO1	282.526	318.885	0.1743	0.459933	NC	No	No	1	AGO1_exon_chr1:35919498	1	1	0	NA	12	41.78	41.54	-0.25	NA
479	AGO3	81.3873	82.9009	0.0228	1	NC	No	No	1	AGO3_exon_chr1:36055636	1	1	0	NA	11	71.61	66.17	-5.44	NA
480	ADPRHL2	151.631	147.89	-0.0454	1	NC	No	No	1	ADPRHL2_exon_chr1:36093096	1	1	0	NA	1
481	TRAPPC3	241.436	251.305	0.0647	1	NC	No	No	1	TRAPPC3_exon_chr1:36137978	1	1	0	NA	2	81.66	77.56	-4.1	NA
482	MAP7D1	399.673	424.091	0.0799	0.646286	NC	No	No	1	MAP7D1_exon_chr1:36180247	1	1	0	NA	1
483	THRAP3	1014.01	942.264	-0.1014	0.475791	NC	No	No	4	THRAP3_exon_chr1:36289059	0.0593	0.0645	0.0052	NA	2	23.06	27.24	4.17	NA
484	THRAP3									THRAP3_exon_chr1:36296582	0.1958	0.1871	-0.0087	NA	3	57.21	58	0.79	NA
485	THRAP3									THRAP3_exon_chr1:36301552	0.2487	0.2301	-0.0186	NA	1
486	THRAP3									THRAP3_exon_chr1:36303795	0.4867	0.5072	0.0205	NA	4	88.65	88.74	0.09	NA
487	SH3D21	23.8666	29.1007	0.2885	1	NC	No	No	2	SH3D21_exon_chr1:36321055	0.6811	0.6059	-0.0752	NA	2	89.13	92.41	3.29	NA
488	SH3D21									SH3D21_exon_chr1:36327719	0.3189	0.3941	0.0752	NA	3	52.96	64.07	11.11	NA
489	EVA1B	905.126	863.377	-0.0705	0.626514	NC	No	No	1	EVA1B_exon_chr1:36322725	1	1	0	NA	1
490	STK40	41.2143	44.7088	0.1	1	NC	No	No	1	STK40_exon_chr1:36343448	1	1	0	NA	4	78.89	69.64	-9.25	NA
491	LSM10	104.84	129.235	0.3102	0.344669	NC	No	No	1	LSM10_exon_chr1:36394153	1	1	0	NA	1
492	OSCP1	25.467	19.743	-0.378	1	NC	No	No	2	OSCP1_exon_chr1:36418578	0.8227	0.6474	-0.1753	NA	1
493	OSCP1									OSCP1_exon_chr1:36428475	0.1445	0.2852	0.1406	NA	1
494	MRPS15	1727.82	1876.59	0.1199	0.269021	NC	No	No	1	MRPS15_exon_chr1:36455925	1	1	0	NA	1
495	ZC3H12A	54.3029	35.8901	-0.5764	0.537383	NC	No	No	1	ZC3H12A_exon_chr1:37482349	1	1	0	NA	1
496	MEAF6	198.93	213.048	0.0922	0.866857	NC	No	No	1	MEAF6_exon_chr1:37494107	1	1	0	NA	5	16.73	14.08	-2.65	NA
497	SNIP1	56.5604	76.6419	0.4301	0.616594	NC	No	No	1	SNIP1_exon_chr1:37538012	1	1	0	NA	3	45.3	43.33	-1.98	NA
498	FTH1P1	136.608	130.526	-0.0836	1	NC	No	No	1	FTH1P1_exon_chr1:37544762	1	1	0	NA	1
499	GNL2	2390.25	2427.57	0.0247	0.774361	NC	No	No	2	GNL2_exon_chr1:37567007	0.7861	0.8247	0.0386	NA	4	90.4	92.27	1.86	NA
500	GNL2									GNL2_exon_chr1:37568417	0.1778	0.1448	-0.0331	NA	1
501	RSPO1	13.3105	11.1634	-0.207	1	NC	No	No	1	RSPO1_exon_chr1:37612921	1	1	0	NA	2	51.88	62.19	10.31	NA
502	C1orf109	156.651	169.498	0.109	0.963506	NC	No	No	1	C1orf109_exon_chr1:37684192	1	1	0	NA	1
503	CDCA8	199.483	213.253	0.0965	0.87044	NC	No	No	3	CDCA8_exon_chr1:37700435	0.3531	0.2998	-0.0533	NA	1
504	CDCA8									CDCA8_exon_chr1:37701753	0.0732	0.0719	-0.0013	NA	1
505	CDCA8									CDCA8_exon_chr1:37708321	0.5738	0.6283	0.0546	NA	2	70.24	75.75	5.51	NA
506	EPHA10	71.3159	77.7341	0.1092	1	NC	No	No	2	EPHA10_exon_chr1:37714097	0.0455	0.0589	0.0134	NA	1
507	EPHA10									EPHA10_exon_chr1:37718486	0.9545	0.9411	-0.0134	NA	1
508	MANEAL	117.981	96.3723	-0.2885	0.516324	NC	No	No	1	MANEAL_exon_chr1:37799566	1	1	0	NA	1
509	YRDC	209.567	276.512	0.4034	0.033143	UP	No	No	1	YRDC_exon_chr1:37803997	1	1	0	NA	5	82.34	80.85	-1.49	NA
510	C1orf122	527.962	509.081	-0.0502	0.746672	NC	No	No	1	C1orf122_exon_chr1:37806978	1	1	0	NA	1
511	MTF1	32.5845	47.8857	0.5445	0.683155	NC	No	No	1	MTF1_exon_chr1:37815566	1	1	0	NA	4	54.57	53.93	-0.64	NA
512	INPP5B	87.811	73.6119	-0.2604	0.734048	NC	No	No	1	INPP5B_exon_chr1:37862430	1	1	0	NA	3	85.09	85.94	0.85	NA
513	SF3A3	385.257	416.057	0.1149	0.500945	NC	No	No	1	SF3A3_exon_chr1:37958263	1	1	0	NA	3	32.48	27.44	-5.04	NA
514	FHL3	160.25	179.233	0.1505	0.772524	NC	No	No	1	FHL3_exon_chr1:37997559	1	1	0	NA	1
515	UTP11	203.63	195.006	-0.0686	1	NC	No	No	2	UTP11_exon_chr1:38016358	0.3413	0.3111	-0.0302	NA	2	89.64	84.99	-4.65	NA
516	UTP11									UTP11_exon_chr1:38023544	0.6185	0.6417	0.0233	NA	3	37.85	42.55	4.7	NA
517	AL354702.1	25.9383	15.9003	-0.697	1	NC	No	No	1	AL354702.1_exon_chr1:38708930	1	1	0	NA	1
518	AL139260.2	616.36	636.388	0.0471	0.736991	NC	No	No	2	AL139260.2_exon_chr1:38839704	0.1411	0.133	-0.0081	NA	1
519	AL139260.2									AL139260.2_exon_chr1:38864714	0.8589	0.867	0.0081	NA	9	81.54	81.21	-0.33	NA
520	AKIRIN1	197.745	202.461	0.039	1	NC	No	No	1	AKIRIN1_exon_chr1:39004044	1	1	0	NA	7	21.05	22.13	1.08	NA
521	NDUFS5	1119.32	1140.8	0.0263	0.796208	NC	No	No	1	NDUFS5_exon_chr1:39034391	1	1	0	NA	1
522	MACF1	283.54	298.235	0.0743	0.889209	NC	No	No	2	MACF1_exon_chr1:39429826	0.1518	0.1419	-0.0099	NA	1
523	MACF1									MACF1_exon_chr1:39484600	0.717	0.7114	-0.0056	NA	5	62.1	55.98	-6.12	NA
524	OXCT2P1	33.8246	31.7107	-0.0974	1	NC	No	No	1	OXCT2P1_exon_chr1:39514955	1	1	0	NA	1
525	PPIEL	161.471	184.481	0.1896	0.620891	NC	No	No	1	PPIEL_exon_chr1:39522505	1	1	0	NA	1
526	BMP8A	12.3298	6.7975	-0.857	1	NC	No	No	1	BMP8A_exon_chr1:39525648	1	1	0	NA	1
527	PABPC4	878.803	971.339	0.1426	0.23626	NC	No	No	2	PABPC4_exon_chr1:39564542	0.9248	0.9079	-0.0169	NA	1
528	PABPC4									PABPC4_exon_chr1:39576790	0.0498	0.0608	0.011	NA	1
529	HEYL	36.7248	40.1714	0.1212	1	NC	No	No	1	HEYL_exon_chr1:39627180	1	1	0	NA	3	68.09	76.46	8.37	NA
530	HPCAL4	52.6845	76.5825	0.5347	0.412089	NC	No	No	1	HPCAL4_exon_chr1:39682733	1	1	0	NA	3	34.13	29.45	-4.68	NA
531	PPIE	287.979	296.66	0.0355	1	NC	No	No	2	PPIE_exon_chr1:39752909	0.379	0.3152	-0.0637	NA	1
532	PPIE									PPIE_exon_chr1:39763688	0.621	0.6848	0.0637	NA	1
533	BMP8B	26.9052	21.9345	-0.3033	1	NC	No	No	1	BMP8B_exon_chr1:39760568	1	1	0	NA	1
534	OXCT2	34.23	32.6547	-0.0741	1	NC	No	No	1	OXCT2_exon_chr1:39771348	1	1	0	NA	1
535	TRIT1	58.3621	51.6373	-0.1983	1	NC	No	No	1	TRIT1_exon_chr1:39841913	1	1	0	NA	1
536	MYCL	22.5983	12.6539	-0.8278	1	NC	No	No	2	MYCL_exon_chr1:39897970	0.8517	0.7516	-0.1001	NA	3	87.22	83.26	-3.95	NA
537	MYCL									MYCL_exon_chr1:39902013	0.1483	0.2484	0.1001	NA	2	62.42	26.02	-36.4	NA
538	MFSD2A	42.6567	61.2784	0.5181	0.519069	NC	No	No	2	MFSD2A_exon_chr1:39955111	0.0864	0.11	0.0236	NA	1
539	MFSD2A									MFSD2A_exon_chr1:39969504	0.9136	0.89	-0.0236	NA	2	93.57	91.76	-1.81	NA
540	AL663070.1	43.8046	46.2558	0.0768	1	NC	No	No	1	AL663070.1_exon_chr1:39962679	1	1	0	NA	1
541	CAP1	1758.82	2060.74	0.2298	0.0135143	NC	No	No	1	CAP1_exon_chr1:40071449	1	1	0	NA	1
542	PPT1	474.648	462.322	-0.0345	0.796757	NC	No	No	1	PPT1_exon_chr1:40074183	1	1	0	NA	1
543	RLF	67.0858	66.2042	-0.0009	1	NC	No	No	1	RLF_exon_chr1:40235791	1	1	0	NA	7	89.79	95.36	5.57	NA
544	AL050341.2	14.9637	13.2338	-0.232	1	NC	No	No	1	AL050341.2_exon_chr1:40257967	1	1	0	NA	1
545	ZMPSTE24	185.109	220.857	0.2536	0.312475	NC	No	No	2	ZMPSTE24_exon_chr1:40281342	0.099	0.0785	-0.0205	NA	1
546	ZMPSTE24									ZMPSTE24_exon_chr1:40292444	0.901	0.9215	0.0205	NA	6	61.34	57.69	-3.65	NA
547	COL9A2	12.8854	6.6595	-1.0152	1	NC	No	No	1	COL9A2_exon_chr1:40301381	1	1	0	NA	3	82.53	86.66	4.12	NA
548	AL031985.2	13.2925	11.9472	-0.1627	1	NC	No	No	1	AL031985.2_exon_chr1:40333557	1	1	0	NA	1
549	SMAP2	59.5972	63.6132	0.0954	1	NC	No	No	1	SMAP2_exon_chr1:40421975	1	1	0	NA	3	78	61.01	-16.99	NA
550	ZNF684	48.1628	47.123	-0.0147	1	NC	No	No	2	ZNF684_exon_chr1:40544396	0.068	0.0613	-0.0067	NA	1
551	ZNF684									ZNF684_exon_chr1:40546561	0.932	0.9387	0.0067	NA	1
552	RIMS3	77.7973	86.5032	0.1689	1	NC	No	No	1	RIMS3_exon_chr1:40626729	1	1	0	NA	1
553	NFYC	209.873	186.938	-0.163	0.620843	NC	No	No	1	NFYC_exon_chr1:40770322	1	1	0	NA	2	28.31	28.49	0.18	NA
554	KCNQ4	13.3147	11.1827	-0.262	1	NC	No	No	1	KCNQ4_exon_chr1:40838310	1	1	0	NA	1
555	CITED4	57.5521	42.1659	-0.476	0.728634	NC	No	No	1	CITED4_exon_chr1:40862363	1	1	0	NA	1
556	CTPS1	472.026	474.009	0.0079	0.877468	NC	No	No	1	CTPS1_exon_chr1:41009444	1	1	0	NA	5	92.11	89.8	-2.3	NA
557	SCMH1	86.8403	74.4364	-0.22	1	NC	No	No	1	SCMH1_exon_chr1:41028319	1	1	0	NA	1
558	FOXO6	44.6642	52.6891	0.2412	1	NC	No	No	1	FOXO6_exon_chr1:41381615	1	1	0	NA	1
559	HIVEP3	42.4835	42.8134	0.0191	1	NC	No	No	2	HIVEP3_exon_chr1:41511266	0.7863	0.8618	0.0754	NA	4	22.8	14.09	-8.71	NA
560	HIVEP3									HIVEP3_exon_chr1:41848445	0.2137	0.1382	-0.0754	NA	2	95.85	81.55	-14.3	NA
561	FOXJ3	180.268	206.358	0.1974	0.549032	NC	No	No	1	FOXJ3_exon_chr1:42179825	1	1	0	NA	1
562	RIMKLA	28.9416	32.2725	0.1297	1	NC	No	No	1	RIMKLA_exon_chr1:42414483	1	1	0	NA	7	27.97	23.05	-4.92	NA
563	PPCS	690.343	637.254	-0.111	0.465448	NC	No	No	1	PPCS_exon_chr1:42459602	1	1	0	NA	1
564	CCDC30	16.9481	14.3821	-0.2439	1	NC	No	No	1	CCDC30_exon_chr1:42473121	1	1	0	NA	2	34.82	36.49	1.66	NA
565	PPIH	210.375	245.919	0.2306	0.364318	NC	No	No	1	PPIH_exon_chr1:42676583	1	1	0	NA	1
566	AC098484.2	12.76	11.8673	-0.1176	1	NC	No	No	2	AC098484.2_exon_chr1:42678734	0.1613	0.4914	0.3301	NA	1
567	AC098484.2									AC098484.2_exon_chr1:42681193	0.8387	0.5086	-0.3301	NA	2	70.05	93.3	23.25	NA
568	YBX1	9602.79	9682.32	0.0122	0.805406	NC	No	No	2	YBX1_exon_chr1:42700780	0.6786	0.6562	-0.0223	NA	1
569	YBX1									YBX1_exon_chr1:42701980	0.321	0.3434	0.0224	NA	1
570	P3H1	212.159	231.814	0.1292	0.778553	NC	No	No	1	P3H1_exon_chr1:42747798	1	1	0	NA	1
571	AC098484.3	53.4093	51.1018	-0.051	1	NC	No	No	1	AC098484.3_exon_chr1:42775208	1	1	0	NA	9	69.58	67	-2.58	NA
572	SVBP	67.9667	76.4371	0.1574	1	NC	No	No	1	SVBP_exon_chr1:42807500	1	1	0	NA	1
573	ZNF691	13.9506	11.8367	-0.2271	1	NC	No	No	1	ZNF691_exon_chr1:42850922	1	1	0	NA	2	75.24	70.23	-5	NA
574	SLC2A1	331.513	531.715	0.6769	4.24531e-08	UP	No	No	1	SLC2A1_exon_chr1:42927241	1	1	0	NA	1
575	EBNA1BP2	1705.72	1615.08	-0.0766	0.611362	NC	No	No	2	EBNA1BP2_exon_chr1:43164493	0.9326	0.9424	0.0098	NA	3	59.8	59.59	-0.21	NA
576	EBNA1BP2									EBNA1BP2_exon_chr1:43164805	0.0588	0.0484	-0.0105	NA	1
577	TMEM125	41.3226	30.1374	-0.4459	1	NC	No	No	1	TMEM125_exon_chr1:43272577	1	1	0	NA	1
578	C1orf210	12.9571	24.2202	0.882	1	NC	No	No	1	C1orf210_exon_chr1:43283107	1	1	0	NA	1
579	CDC20	2100.32	2141.91	0.0282	0.711629	NC	No	No	1	CDC20_exon_chr1:43362950	1	1	0	NA	1
580	ELOVL1	1222.21	1142.48	-0.0988	0.431531	NC	No	No	1	ELOVL1_exon_chr1:43364794	1	1	0	NA	1
581	MED8	303.545	329.455	0.1233	0.530934	NC	No	No	1	MED8_exon_chr1:43385106	1	1	0	NA	5	26.31	22.17	-4.14	NA
582	HYI-AS1	87.0162	89.4515	0.0402	1	NC	No	No	1	HYI-AS1_exon_chr1:43450336	1	1	0	NA	3	9.83	13.77	3.94	NA
583	HYI	70.5016	72.4138	0.0241	1	NC	No	No	1	HYI_exon_chr1:43451740	1	1	0	NA	1
584	PTPRF	265.284	289.094	0.1214	0.762963	NC	No	No	1	PTPRF_exon_chr1:43621934	1	1	0	NA	2	86.66	88.48	1.82	NA
585	KDM4A	162.078	169.635	0.0656	1	NC	No	No	1	KDM4A_exon_chr1:43704229	1	1	0	NA	3	55.29	55.77	0.48	NA
586	ARTN	23.3588	23.3287	-0.001	1	NC	No	No	1	ARTN_exon_chr1:43935806	1	1	0	NA	1
587	IPO13	23.2111	35.639	0.5977	1	NC	No	No	1	IPO13_exon_chr1:43967585	1	1	0	NA	2	49.57	40.54	-9.03	NA
588	DPH2	480.651	515.732	0.1001	0.538794	NC	No	No	1	DPH2_exon_chr1:43972414	1	1	0	NA	1
589	ATP6V0B	276.534	334.976	0.2693	0.281052	NC	No	No	1	ATP6V0B_exon_chr1:43976301	1	1	0	NA	1
590	B4GALT2	858.135	878.72	0.0338	0.752899	NC	No	No	1	B4GALT2_exon_chr1:43990297	1	1	0	NA	1
591	SLC6A9	12.8829	6.9827	-0.9401	1	NC	No	No	1	SLC6A9_exon_chr1:43997739	1	1	0	NA	1
592	CCDC24	220.484	164.05	-0.4205	0.0606675	NC	No	No	1	CCDC24_exon_chr1:43993803	1	1	0	NA	1
593	AL356653.1	22.8485	19.3217	-0.2322	1	NC	No	No	1	AL356653.1_exon_chr1:44122512	1	1	0	NA	1
594	DMAP1	135.895	147.781	0.1229	0.859766	NC	No	No	1	DMAP1_exon_chr1:44220558	1	1	0	NA	1
595	ERI3	486.145	404.257	-0.2604	0.0887948	NC	No	No	1	ERI3_exon_chr1:44221640	1	1	0	NA	1
596	RNF220	162.511	169.34	0.0703	1	NC	No	No	2	RNF220_exon_chr1:44636029	0.1961	0.1757	-0.0204	NA	2	79.67	84.58	4.9	NA
597	RNF220									RNF220_exon_chr1:44648307	0.7936	0.8053	0.0118	NA	1
598	TMEM53	50.4442	34.9957	-0.5486	0.561653	NC	No	No	2	TMEM53_exon_chr1:44636457	0.2946	0.3196	0.025	NA	1
599	TMEM53									TMEM53_exon_chr1:44655209	0.7054	0.6804	-0.025	NA	3	63.14	62.93	-0.21	NA
600	RNU5F-1	9.8683	7.485	-0.4124	1	NC	No	No	1	RNU5F-1_exon_chr1:44721902	1	1	0	NA	2	32.84	10.97	-21.88	NA
601	ARMH1	11.0862	8.7643	-0.4089	1	NC	No	No	1	ARMH1_exon_chr1:44725290	1	1	0	NA	1
602	KIF2C	234.964	232.237	-0.0133	1	NC	No	No	2	KIF2C_exon_chr1:44753732	0.0697	0.04	-0.0298	NA	1
603	KIF2C									KIF2C_exon_chr1:44766825	0.9303	0.96	0.0298	NA	3	83.64	83.38	-0.26	NA
604	RPS8	27834.8	26027.4	-0.097	0.191218	NC	No	No	1	RPS8_exon_chr1:44777842	1	1	0	NA	4	48.33	49.03	0.7	NA
605	RPS15AP11	134.424	143.295	0.0895	1	NC	No	No	1	RPS15AP11_exon_chr1:44780715	1	1	0	NA	1
606	PLK3	114.78	138.031	0.2575	0.554474	NC	No	No	1	PLK3_exon_chr1:44805486	1	1	0	NA	1
607	EIF2B3	77.8631	69.7086	-0.1721	0.943354	NC	No	No	2	EIF2B3_exon_chr1:44851003	0.6124	0.592	-0.0204	NA	2	44.71	58.21	13.5	NA
608	EIF2B3									EIF2B3_exon_chr1:44874826	0.3614	0.3936	0.0323	NA	1
609	HECTD3	96.2196	87.8219	-0.112	1	NC	No	No	1	HECTD3_exon_chr1:45003576	1	1	0	NA	1
610	UROD	382.452	394.881	0.0467	0.761856	NC	No	No	1	UROD_exon_chr1:45013135	1	1	0	NA	1
611	AL451136.1	82.9868	63.9087	-0.3732	0.448934	NC	No	No	1	AL451136.1_exon_chr1:45329437	1	1	0	NA	1
612	TOE1	98.1751	130.145	0.4018	0.185949	NC	No	No	1	TOE1_exon_chr1:45342734	1	1	0	NA	2	35.12	30.33	-4.8	NA
613	CCDC163	10.7261	13.3634	0.3181	1	NC	No	No	1	CCDC163_exon_chr1:45495166	1	1	0	NA	2	37.31	37.41	0.1	NA
614	MMACHC	117.855	117.618	-0.0038	1	NC	No	No	1	MMACHC_exon_chr1:45508795	1	1	0	NA	7	44.66	42.85	-1.81	NA
615	PRDX1	8088.86	7607.19	-0.0889	0.292395	NC	No	No	1	PRDX1_exon_chr1:45511414	1	1	0	NA	2	92.71	91.8	-0.9	NA
616	AKR1A1	1073.53	1026.06	-0.068	0.562917	NC	No	No	1	AKR1A1_exon_chr1:45569890	1	1	0	NA	1
617	NASP	2338.52	2348.2	0.0058	0.848631	NC	No	No	4	NASP_exon_chr1:45606481	0.1616	0.1469	-0.0148	NA	1
618	NASP									NASP_exon_chr1:45607320	0.0449	0.0653	0.0204	NA	5	20.67	23.87	3.19	NA
619	NASP									NASP_exon_chr1:45609299	0.1753	0.1743	-0.001	NA	1
620	NASP									NASP_exon_chr1:45618060	0.5999	0.6002	0.0003	NA	2	9.5	9.43	-0.07	NA
621	GPBP1L1	472.238	501.668	0.0866	0.574171	NC	No	No	1	GPBP1L1_exon_chr1:45628408	1	1	0	NA	7	38.5	41.64	3.13	NA
622	TMEM69	92.565	84.398	-0.1532	1	NC	No	No	1	TMEM69_exon_chr1:45693203	1	1	0	NA	2	84.94	84.86	-0.08	NA
623	AL604028.1	89.0971	70.3477	-0.3394	0.487853	NC	No	No	2	AL604028.1_exon_chr1:45694967	0.2871	0.2471	-0.04	NA	1
624	AL604028.1									AL604028.1_exon_chr1:45697332	0.7129	0.7529	0.04	NA	1
625	IPP	13.1654	13.0667	0.0002	1	NC	No	No	3	IPP_exon_chr1:45700190	0.4956	0.6238	0.1282	NA	3	68.13	73.1	4.97	NA
626	IPP									IPP_exon_chr1:45717017	0.314	0.1296	-0.1844	NA	1
627	IPP									IPP_exon_chr1:45741332	0.1904	0.2465	0.0561	NA	1
628	MAST2	175.396	172.46	-0.0349	1	NC	No	No	1	MAST2_exon_chr1:46034072	1	1	0	NA	1
629	AL358075.4	22.1691	20.3654	-0.1296	1	NC	No	No	1	AL358075.4_exon_chr1:46043871	1	1	0	NA	1
630	TSPAN1	54.4213	25.8157	-1.0757	0.0765394	NC	No	No	1	TSPAN1_exon_chr1:46184190	1	1	0	NA	2	91.99	91.88	-0.12	NA
631	POMGNT1	224.196	224.346	0.0036	1	NC	No	No	1	POMGNT1_exon_chr1:46189567	1	1	0	NA	1
632	LRRC41	97.1643	87.189	-0.1653	1	NC	No	No	2	LRRC41_exon_chr1:46279084	0.906	0.9388	0.0328	NA	1
633	LRRC41									LRRC41_exon_chr1:46284430	0.077	0.0478	-0.0292	NA	2	18.22	14.63	-3.59	NA
634	RAD54L	351.707	329.675	-0.0922	0.633992	NC	No	No	1	RAD54L_exon_chr1:46278071	1	1	0	NA	1
635	UQCRH	2441.92	2615.18	0.099	0.296515	NC	No	No	1	UQCRH_exon_chr1:46316551	1	1	0	NA	1
636	NSUN4	179.024	172.503	-0.0515	1	NC	No	No	1	NSUN4_exon_chr1:46361569	1	1	0	NA	4	22.52	19.79	-2.72	NA
637	FAAH	87.3661	86.8948	-0.025	1	NC	No	No	1	FAAH_exon_chr1:46413446	1	1	0	NA	1
638	FAAHP1	36.6565	20.1127	-0.8484	0.367956	NC	No	No	2	FAAHP1_exon_chr1:46445198	0.1259	0.0499	-0.076	NA	1
639	FAAHP1									FAAHP1_exon_chr1:46482209	0.8741	0.9501	0.076	NA	1
640	MKNK1	84.9097	76.392	-0.1431	1	NC	No	No	3	MKNK1_exon_chr1:46558800	0.6096	0.583	-0.0267	NA	1
641	MKNK1									MKNK1_exon_chr1:46576654	0.3372	0.3457	0.0085	NA	2	12.63	11.52	-1.11	NA
642	MKNK1									MKNK1_exon_chr1:46580627	0.0532	0.0714	0.0182	NA	1
643	MOB3C	62.3079	64.6723	0.0745	1	NC	No	No	1	MOB3C_exon_chr1:46609684	1	1	0	NA	1
644	ATPAF1	484.082	372.462	-0.3722	0.00504705	NC	No	No	1	ATPAF1_exon_chr1:46635970	1	1	0	NA	3	11.17	15.68	4.51	NA
645	EFCAB14	167.718	187.775	0.1617	0.659957	NC	No	No	1	EFCAB14_exon_chr1:46678636	1	1	0	NA	9	83.18	78.16	-5.02	NA
646	STIL	82.5372	88.3466	0.1038	1	NC	No	No	1	STIL_exon_chr1:47251922	1	1	0	NA	1
647	CMPK1	207.878	239.053	0.2102	0.48647	NC	No	No	1	CMPK1_exon_chr1:47376703	1	1	0	NA	5	54.62	62.22	7.59	NA
648	FOXD2	24.3506	19.9389	-0.2801	1	NC	No	No	1	FOXD2_exon_chr1:47436016	1	1	0	NA	1
649	SPATA6	9.1812	7.1758	-0.3348	1	NC	No	No	2	SPATA6_exon_chr1:48298893	0.8171	0.9065	0.0894	NA	5	74.21	67.16	-7.06	NA
650	SPATA6									SPATA6_exon_chr1:48399644	0.1829	0.0935	-0.0894	NA	1
651	FAF1	355.059	337.531	-0.0768	0.682688	NC	No	No	1	FAF1_exon_chr1:50441523	1	1	0	NA	1
652	CDKN2C	23.1625	20.9231	-0.1501	1	NC	No	No	2	CDKN2C_exon_chr1:50967935	0.0359	0.0732	0.0372	NA	1
653	CDKN2C									CDKN2C_exon_chr1:50973892	0.9641	0.9268	-0.0372	NA	2	82.76	88.66	5.91	NA
654	RNF11	131.491	155.933	0.234	0.563052	NC	No	No	1	RNF11_exon_chr1:51271150	1	1	0	NA	10	77.22	79.12	1.9	NA
655	TTC39A	68.5984	79.2336	0.213	0.824386	NC	No	No	1	TTC39A_exon_chr1:51288280	1	1	0	NA	5	65.4	69.66	4.26	NA
656	EPS15	174.025	167.939	-0.0376	1	NC	No	No	1	EPS15_exon_chr1:51356846	1	1	0	NA	6	38.91	38.53	-0.38	NA
657	OSBPL9	126.127	155.486	0.3092	0.303744	NC	No	No	1	OSBPL9_exon_chr1:51787714	1	1	0	NA	8	79.59	78.78	-0.81	NA
658	NRDC	868.751	914.018	0.0704	0.620843	NC	No	No	2	NRDC_exon_chr1:51789433	0.7763	0.8123	0.036	NA	1
659	NRDC									NRDC_exon_chr1:51840514	0.2185	0.1815	-0.0371	NA	3	58.18	53.21	-4.97	NA
660	RAB3B	105.867	116.849	0.147	0.825958	NC	No	No	1	RAB3B_exon_chr1:51920114	1	1	0	NA	10	47.59	44.73	-2.87	NA
661	AL445685.3	531.99	461.262	-0.2012	0.161874	NC	No	No	2	AL445685.3_exon_chr1:52021012	0.9272	0.9317	0.0045	NA	4	93.74	94.34	0.61	NA
662	AL445685.3									AL445685.3_exon_chr1:52034051	0.0728	0.0683	-0.0045	NA	1
663	BTF3L4	400.556	373.511	-0.1009	0.559132	NC	No	No	1	BTF3L4_exon_chr1:52086111	1	1	0	NA	7	43.01	36.85	-6.16	NA
664	CC2D1B	275.746	300.224	0.1262	0.734048	NC	No	No	1	CC2D1B_exon_chr1:52353647	1	1	0	NA	4	6.72	7.76	1.04	NA
665	ZFYVE9	190.429	160.089	-0.2426	0.412463	NC	No	No	1	ZFYVE9_exon_chr1:52346059	1	1	0	NA	1
666	ORC1	143.057	138.489	-0.03	1	NC	No	No	1	ORC1_exon_chr1:52373375	1	1	0	NA	1
667	PRPF38A	248.136	279.711	0.1701	0.586247	NC	No	No	1	PRPF38A_exon_chr1:52416647	1	1	0	NA	9	28.54	25.09	-3.46	NA
668	TUT4	125.852	117.285	-0.0866	1	NC	No	No	4	TUT4_exon_chr1:52425507	0.4452	0.5619	0.1167	NA	2	40.15	35.64	-4.5	NA
669	TUT4									TUT4_exon_chr1:52475535	0.2737	0.1898	-0.0839	NA	1
670	TUT4									TUT4_exon_chr1:52477882	0.1502	0.0904	-0.0598	NA	1
671	TUT4									TUT4_exon_chr1:52509712	0.0355	0.087	0.0515	NA	1
672	COA7	373.1	403.785	0.1169	0.534828	NC	No	No	1	COA7_exon_chr1:52688168	1	1	0	NA	10	80.07	81.97	1.9	NA
673	RPS13P2	5.7578	6.7646	0.25	1	NC	No	No	1	RPS13P2_exon_chr1:52772648	1	1	0	NA	1
674	ZYG11B	61.2181	71.7997	0.2317	1	NC	No	No	1	ZYG11B_exon_chr1:52821438	1	1	0	NA	2	85.13	93.38	8.25	NA
675	ECHDC2	70.7464	77.5084	0.1265	1	NC	No	No	1	ECHDC2_exon_chr1:52902041	1	1	0	NA	2	11.92	17.4	5.48	NA
676	AC099677.1	14.0505	11.0945	-0.4004	1	NC	No	No	1	AC099677.1_exon_chr1:52920421	1	1	0	NA	1
677	SCP2	234.154	283.605	0.2722	0.220416	NC	No	No	1	SCP2_exon_chr1:53047857	1	1	0	NA	6	86.7	90.27	3.57	NA
678	CZIB	134.545	115.129	-0.2286	0.540095	NC	No	No	1	CZIB_exon_chr1:53214736	1	1	0	NA	3	86.23	86.66	0.43	NA
679	CPT2	300.058	335.637	0.1566	0.413711	NC	No	No	1	CPT2_exon_chr1:53213263	1	1	0	NA	1
680	MAGOH	1276.53	1417.68	0.1547	0.185949	NC	No	No	1	MAGOH_exon_chr1:53227144	1	1	0	NA	1
681	LRP8	350.288	366.756	0.0656	0.737118	NC	No	No	2	LRP8_exon_chr1:53247056	0.9138	0.9047	-0.0091	NA	6	44.43	37.3	-7.13	NA
682	LRP8									LRP8_exon_chr1:53250862	0.0733	0.0745	0.0012	NA	1
683	NDC1	324.872	377.478	0.2133	0.204658	NC	No	No	1	NDC1_exon_chr1:53768033	1	1	0	NA	9	75.87	69.59	-6.28	NA
684	YIPF1	104.546	98.7294	-0.0626	1	NC	No	No	1	YIPF1_exon_chr1:53852270	1	1	0	NA	2	87.34	93.12	5.78	NA
685	HSPB11	170.837	165.489	-0.0449	1	NC	No	No	2	HSPB11_exon_chr1:53917116	0.0843	0.0321	-0.0523	NA	1
686	HSPB11									HSPB11_exon_chr1:53921767	0.9157	0.9679	0.0523	NA	1
687	LRRC42	852.251	956.64	0.1703	0.157262	NC	No	No	1	LRRC42_exon_chr1:53967664	1	1	0	NA	1
688	TMEM59	439.797	486.694	0.1431	0.369634	NC	No	No	1	TMEM59_exon_chr1:54032305	1	1	0	NA	4	72.92	74.82	1.9	NA
689	AL353898.1	293.026	303.138	0.0529	1	NC	No	No	1	AL353898.1_exon_chr1:54089855	1	1	0	NA	1
690	TCEANC2	47.5089	45.4387	-0.0626	1	NC	No	No	1	TCEANC2_exon_chr1:54096284	1	1	0	NA	5	75.7	77.27	1.56	NA
691	AL357673.1	16.6118	14.5186	-0.1834	1	NC	No	No	2	AL357673.1_exon_chr1:54133294	0.1258	0.0802	-0.0455	NA	1
692	AL357673.1									AL357673.1_exon_chr1:54174822	0.8742	0.9198	0.0455	NA	3	79.76	85.15	5.39	NA
693	MRPL37	504.183	528.922	0.0681	0.669992	NC	No	No	1	MRPL37_exon_chr1:54218171	1	1	0	NA	1
694	SSBP3	167.662	196.474	0.2295	0.422726	NC	No	No	1	SSBP3_exon_chr1:54227160	1	1	0	NA	6	50.28	44.39	-5.89	NA
695	AC099796.1	47.9424	51.0285	0.0773	1	NC	No	No	1	AC099796.1_exon_chr1:54524823	1	1	0	NA	1
696	ACOT11	52.5934	37.6415	-0.4471	0.855564	NC	No	No	1	ACOT11_exon_chr1:54608956	1	1	0	NA	2	15.85	24.87	9.01	NA
697	TTC4	17.3971	17.3205	-0.0157	1	NC	No	No	2	TTC4_exon_chr1:54717491	0.8544	0.7356	-0.1189	NA	2	11.62	16.38	4.76	NA
698	TTC4									TTC4_exon_chr1:54728345	0.1456	0.2644	0.1189	NA	1
699	MROH7-TTC4	95.8586	137.502	0.5216	0.0606591	NC	No	No	1	MROH7-TTC4_exon_chr1:54741410	1	1	0	NA	4	28.03	26.24	-1.79	NA
700	PARS2	18.6151	14.8623	-0.3204	1	NC	No	No	1	PARS2_exon_chr1:54759190	1	1	0	NA	1
701	TTC22	7.4076	9.387	0.3369	1	NC	No	No	1	TTC22_exon_chr1:54781779	1	1	0	NA	1
702	DHCR24	413.728	451.779	0.1195	0.542383	NC	No	No	1	DHCR24_exon_chr1:54853612	1	1	0	NA	1
703	DHCR24-DT	7.8856	7.7597	-0.0652	1	NC	No	No	1	DHCR24-DT_exon_chr1:54888499	1	1	0	NA	1
704	TMEM61	12.679	11.5112	-0.1512	1	NC	No	No	1	TMEM61_exon_chr1:54991835	1	1	0	NA	1
705	PCSK9	119.365	128.124	0.09	1	NC	No	No	1	PCSK9_exon_chr1:55063368	1	1	0	NA	1
706	USP24	123.263	131.917	0.1045	0.907409	NC	No	No	1	USP24_exon_chr1:55069107	1	1	0	NA	7	60.05	64.62	4.57	NA
707	AC099789.1	2115.37	2163.13	0.0334	0.747656	NC	No	No	1	AC099789.1_exon_chr1:56619549	1	1	0	NA	1
708	PRKAA2	25.0369	21.7274	-0.2424	1	NC	No	No	1	PRKAA2_exon_chr1:56707474	1	1	0	NA	6	76.43	65.94	-10.49	NA
709	RPS26P15	3678.69	3546.33	-0.0519	0.651359	NC	No	No	1	RPS26P15_exon_chr1:58056480	1	1	0	NA	1
710	OMA1	26.7865	33.4831	0.3116	1	NC	No	No	1	OMA1_exon_chr1:58481174	1	1	0	NA	3	89.03	91.93	2.89	NA
711	TACSTD2	9.5405	5.5319	-0.7365	1	NC	No	No	1	TACSTD2_exon_chr1:58577252	1	1	0	NA	1
712	MYSM1	76.0991	69.0088	-0.1199	1	NC	No	No	1	MYSM1_exon_chr1:58660155	1	1	0	NA	3	86.96	81.92	-5.04	NA
713	JUN	79.682	77.6875	-0.0486	1	NC	No	No	1	JUN_exon_chr1:58784047	1	1	0	NA	5	55.69	62.37	6.68	NA
714	HOOK1	115.583	123.124	0.0921	1	NC	No	No	2	HOOK1_exon_chr1:59848314	0.3565	0.3981	0.0416	NA	1
715	HOOK1									HOOK1_exon_chr1:59872794	0.6435	0.6019	-0.0416	NA	7	72.91	66.59	-6.31	NA
716	NFIA	84.6538	91.6752	0.1116	1	NC	No	No	2	NFIA_exon_chr1:61088148	0.1313	0.0771	-0.0542	NA	2	27.81	33.37	5.55	NA
717	NFIA									NFIA_exon_chr1:61455302	0.8687	0.9229	0.0542	NA	4	89.66	88.03	-1.63	NA
718	TM2D1	47.7821	48.4048	0.0133	1	NC	No	No	2	TM2D1_exon_chr1:61681350	0.7511	0.8843	0.1333	NA	1
719	TM2D1									TM2D1_exon_chr1:61700274	0.2489	0.1157	-0.1333	NA	1
720	PATJ	65.3626	67.26	0.0334	1	NC	No	No	2	PATJ_exon_chr1:62117131	0.3542	0.2243	-0.1299	NA	1
721	PATJ									PATJ_exon_chr1:62160907	0.6268	0.7532	0.1265	NA	5	34.12	41.24	7.12	NA
722	USP1	442.337	484.249	0.1298	0.468605	NC	No	No	2	USP1_exon_chr1:62444737	0.6225	0.5456	-0.0769	NA	3	52.52	53.71	1.2	NA
723	USP1									USP1_exon_chr1:62450245	0.3775	0.4544	0.0769	NA	5	27.9	28.18	0.28	NA
724	DOCK7	35.809	33.62	-0.0964	1	NC	No	No	1	DOCK7_exon_chr1:62455456	1	1	0	NA	2	17.58	7.99	-9.59	NA
725	ATG4C	79.8133	104.989	0.4099	0.359866	NC	No	No	1	ATG4C_exon_chr1:62863991	1	1	0	NA	7	74.42	72.18	-2.23	NA
726	FOXD3-AS1	13.7227	17.961	0.373	1	NC	No	No	1	FOXD3-AS1_exon_chr1:63321190	1	1	0	NA	1
727	ALG6	168.954	158.044	-0.0948	1	NC	No	No	1	ALG6_exon_chr1:63436822	1	1	0	NA	1
728	ITGB3BP	370.244	338.219	-0.1237	0.51287	NC	No	No	2	ITGB3BP_exon_chr1:63441103	0.8467	0.8155	-0.0312	NA	1
729	ITGB3BP									ITGB3BP_exon_chr1:63490218	0.1128	0.1532	0.0404	NA	1
730	EFCAB7	13.2652	8.2868	-0.6891	1	NC	No	No	2	EFCAB7_exon_chr1:63551724	0.1587	0.2364	0.0777	NA	1
731	EFCAB7									EFCAB7_exon_chr1:63572441	0.8105	0.7636	-0.0469	NA	1
732	PGM1	206.893	198.536	-0.0675	0.997702	NC	No	No	1	PGM1_exon_chr1:63659585	1	1	0	NA	1
733	ROR1	11.9961	12.501	0.019	1	NC	No	No	1	ROR1_exon_chr1:64177427	1	1	0	NA	4	34.86	21.95	-12.91	NA
734	CACHD1	28.6062	42.7779	0.6137	1	NC	No	No	1	CACHD1_exon_chr1:64691322	1	1	0	NA	1
735	RAVER2	91.3511	81.4947	-0.1578	1	NC	No	No	1	RAVER2_exon_chr1:64830838	1	1	0	NA	7	59.16	58.94	-0.22	NA
736	JAK1	231.562	257.242	0.148	0.676438	NC	No	No	3	JAK1_exon_chr1:64834657	0.4357	0.497	0.0614	NA	1
737	JAK1									JAK1_exon_chr1:64864972	0.4031	0.3537	-0.0494	NA	2	91.2	90.26	-0.94	NA
738	JAK1									JAK1_exon_chr1:64876473	0.1612	0.1492	-0.012	NA	1
739	AK4	270.06	236.379	-0.1949	0.491567	NC	No	No	1	AK4_exon_chr1:65226062	1	1	0	NA	6	16.45	16.97	0.51	NA
740	DNAJC6	37.4613	40.1813	0.1167	1	NC	No	No	1	DNAJC6_exon_chr1:65412923	1	1	0	NA	1
741	LEPROT	64.1421	81.536	0.3548	0.552417	NC	No	No	2	LEPROT_exon_chr1:65427781	0.0658	0.095	0.0293	NA	1
742	LEPROT									LEPROT_exon_chr1:65431802	0.9342	0.905	-0.0293	NA	5	43.12	34.93	-8.2	NA
743	LEPR	15.242	6.2069	-1.2545	1	NC	No	No	2	LEPR_exon_chr1:65633151	0.8628	0.9716	0.1088	NA	1
744	LEPR									LEPR_exon_chr1:65636190	0.1372	0.0284	-0.1088	NA	1
745	PDE4B	372.913	312.614	-0.2436	0.193148	NC	No	No	2	PDE4B_exon_chr1:66361614	0.0995	0.1108	0.0113	NA	1
746	PDE4B									PDE4B_exon_chr1:66372312	0.9005	0.8892	-0.0113	NA	3	78.19	80.84	2.65	NA
747	MIER1	73.5436	93.3599	0.346	0.474408	NC	No	No	4	MIER1_exon_chr1:66946149	0.0617	0.0622	0.0005	NA	1
748	MIER1									MIER1_exon_chr1:66958058	0.1617	0.1507	-0.011	NA	2	39.86	39.66	-0.2	NA
749	MIER1									MIER1_exon_chr1:66963087	0.2984	0.2641	-0.0344	NA	1
750	MIER1									MIER1_exon_chr1:66984571	0.4782	0.523	0.0448	NA	7	68.3	66.98	-1.32	NA
751	SLC35D1	63.3262	56.1466	-0.149	1	NC	No	No	1	SLC35D1_exon_chr1:67004448	1	1	0	NA	1
752	SERBP1	4024.19	4240.32	0.0759	0.411696	NC	No	No	2	SERBP1_exon_chr1:67413263	0.6035	0.6173	0.0138	NA	22	38.09	36.36	-1.73	NA
753	SERBP1									SERBP1_exon_chr1:67430415	0.3725	0.3611	-0.0115	NA	2	26.95	26.87	-0.08	NA
754	GADD45A	774.356	599.389	-0.3705	0.00229241	NC	No	No	1	GADD45A_exon_chr1:67687660	1	1	0	NA	4	28.15	27.47	-0.68	NA
755	GNG12	307.26	264.665	-0.2106	0.365939	NC	No	No	1	GNG12_exon_chr1:67705576	1	1	0	NA	5	51.67	51.27	-0.4	NA
756	WLS	93.1378	86.1238	-0.1264	1	NC	No	No	3	WLS_exon_chr1:68098753	0.3365	0.3854	0.0488	NA	1
757	WLS									WLS_exon_chr1:68126335	0.5609	0.5375	-0.0235	NA	5	21.34	17.92	-3.42	NA
758	WLS									WLS_exon_chr1:68142862	0.1025	0.0772	-0.0254	NA	2	13.58	10.53	-3.05	NA
759	RPS7P4	18.1542	18.9797	0.0376	1	NC	No	No	1	RPS7P4_exon_chr1:68243055	1	1	0	NA	1
760	DEPDC1	141.738	131.132	-0.1148	0.969618	NC	No	No	1	DEPDC1_exon_chr1:68477069	1	1	0	NA	11	51.95	52.12	0.17	NA
761	AL138789.1	85.1839	120.601	0.4966	0.154013	NC	No	No	1	AL138789.1_exon_chr1:68482760	1	1	0	NA	4	38.47	34.38	-4.09	NA
762	LRRC40	155.446	172.163	0.1519	0.882424	NC	No	No	1	LRRC40_exon_chr1:70145905	1	1	0	NA	1
763	SRSF11	3970.31	3253.45	-0.2875	0.000620518	NC	No	No	4	SRSF11_exon_chr1:70237424	0.0907	0.0975	0.0068	NA	1
764	SRSF11									SRSF11_exon_chr1:70244683	0.3622	0.2737	-0.0884	NA	1
765	SRSF11									SRSF11_exon_chr1:70246729	0.1229	0.1397	0.0168	NA	1
766	SRSF11									SRSF11_exon_chr1:70248393	0.4238	0.488	0.0642	NA	9	35.13	38.15	3.02	NA
767	ANKRD13C	109.973	136.606	0.3159	0.331274	NC	No	No	1	ANKRD13C_exon_chr1:70262847	1	1	0	NA	9	31.22	29.58	-1.64	NA
768	HHLA3	22.7298	13.3136	-0.7656	1	NC	No	No	1	HHLA3_exon_chr1:70367616	1	1	0	NA	1
769	CTH	18.4128	20.8331	0.1757	1	NC	No	No	1	CTH_exon_chr1:70439100	1	1	0	NA	3	52.85	51.38	-1.47	NA
770	ZRANB2	246.501	250.574	0.0189	1	NC	No	No	3	ZRANB2_exon_chr1:71065137	0.8671	0.8922	0.0251	NA	6	78.79	74.4	-4.39	NA
771	ZRANB2									ZRANB2_exon_chr1:71070996	0.0573	0.0451	-0.0122	NA	1
772	ZRANB2									ZRANB2_exon_chr1:71072548	0.0635	0.0497	-0.0139	NA	1
773	MIR186	6.6429	5.7363	-0.1778	1	NC	No	No	1	MIR186_exon_chr1:71067716	1	1	0	NA	2	41.67	38.91	-2.76	NA
774	FPGT	26.5825	26.0105	-0.0363	1	NC	No	No	1	FPGT_exon_chr1:74204390	1	1	0	NA	6	61.54	67.86	6.32	NA
775	CRYZ	92.2313	104.452	0.1628	0.951982	NC	No	No	1	CRYZ_exon_chr1:74706457	1	1	0	NA	1
776	TYW3	310.456	360.473	0.211	0.333784	NC	No	No	2	TYW3_exon_chr1:74752291	0.09	0.0601	-0.0299	NA	1
777	TYW3									TYW3_exon_chr1:74763892	0.91	0.9399	0.0299	NA	9	52.37	54.86	2.5	NA
778	ACADM	189.051	211.927	0.1547	0.695638	NC	No	No	1	ACADM_exon_chr1:75762691	1	1	0	NA	7	69.75	70.44	0.69	NA
779	RABGGTB	335.273	423.63	0.3414	0.0216692	NC	No	No	1	RABGGTB_exon_chr1:75794509	1	1	0	NA	2	55.28	53.39	-1.9	NA
780	ST6GALNAC3	11.2356	8.2523	-0.4672	1	NC	No	No	2	ST6GALNAC3_exon_chr1:76576845	0.4001	0.3567	-0.0435	NA	1
781	ST6GALNAC3									ST6GALNAC3_exon_chr1:76628619	0.5999	0.6433	0.0435	NA	2	56.95	28.25	-28.7	NA
782	ST6GALNAC5	6.9493	9.7251	0.495	1	NC	No	No	1	ST6GALNAC5_exon_chr1:77062974	1	1	0	NA	1
783	PIGK	117.103	133.601	0.1942	0.718362	NC	No	No	1	PIGK_exon_chr1:77092490	1	1	0	NA	7	60.8	54.93	-5.87	NA
784	AC113935.1	691.388	708.539	0.0331	0.790344	NC	No	No	1	AC113935.1_exon_chr1:77129113	1	1	0	NA	1
785	AC118549.1	120.014	118.387	-0.0113	1	NC	No	No	2	AC118549.1_exon_chr1:77565784	0.7624	0.7502	-0.0122	NA	5	20.35	16.3	-4.06	NA
786	AC118549.1									AC118549.1_exon_chr1:77633405	0.2241	0.1842	-0.0399	NA	1
787	USP33	343.881	409.419	0.2521	0.0902454	NC	No	No	2	USP33_exon_chr1:77697931	0.9371	0.9426	0.0055	NA	1
788	USP33									USP33_exon_chr1:77711855	0.0629	0.0574	-0.0055	NA	1
789	AC138392.1	26.044	25.6238	-0.0183	1	NC	No	No	1	AC138392.1_exon_chr1:77811781	1	1	0	NA	2	31.48	44.03	12.55	NA
790	NSRP1P1	57.1077	44.4641	-0.3552	1	NC	No	No	1	NSRP1P1_exon_chr1:77847109	1	1	0	NA	4	24.53	24.6	0.07	NA
791	MIGA1	86.0689	83.2323	-0.0259	1	NC	No	No	1	MIGA1_exon_chr1:77874845	1	1	0	NA	5	93.49	92.01	-1.48	NA
792	FUBP1	447.23	510.193	0.191	0.213831	NC	No	No	3	FUBP1_exon_chr1:77944269	0.0971	0.1061	0.009	NA	1
793	FUBP1									FUBP1_exon_chr1:77949300	0.4828	0.5859	0.103	Up	1
794	FUBP1									FUBP1_exon_chr1:77964356	0.4192	0.3068	-0.1124	NA	1
795	AC103591.3	42.9854	28.4247	-0.5462	1	NC	No	No	1	AC103591.3_exon_chr1:78004554	1	1	0	NA	1
796	DNAJB4	107.075	115.348	0.1161	1	NC	No	No	1	DNAJB4_exon_chr1:78016013	1	1	0	NA	9	52.5	44.36	-8.15	NA
797	TTLL7	96.346	97.4682	0.0093	1	NC	No	No	2	TTLL7_exon_chr1:83870082	0.6493	0.7034	0.0542	NA	9	59.18	54.69	-4.49	NA
798	TTLL7									TTLL7_exon_chr1:83911363	0.3335	0.293	-0.0406	NA	1
799	AL359504.2	15.2898	11.3537	-0.4138	1	NC	No	No	1	AL359504.2_exon_chr1:84077931	1	1	0	NA	2	6.06	20.54	14.49	NA
800	PRKACB	826.827	812.8	-0.0259	0.737118	NC	No	No	2	PRKACB_exon_chr1:84204478	0.043	0.0596	0.0166	NA	4	95.07	90.5	-4.58	NA
801	PRKACB									PRKACB_exon_chr1:84235179	0.957	0.9404	-0.0166	NA	1
802	AL359273.2	29.2686	19.1977	-0.6164	1	NC	No	No	1	AL359273.2_exon_chr1:84349630	1	1	0	NA	1
803	AL844170.1	27.1945	21.5494	-0.3198	1	NC	No	No	1	AL844170.1_exon_chr1:84478866	1	1	0	NA	1
804	RPF1	1727.28	1560.62	-0.1423	0.249899	NC	No	No	2	RPF1_exon_chr1:84480955	0.7282	0.7045	-0.0237	NA	1
805	RPF1									RPF1_exon_chr1:84497428	0.2718	0.2955	0.0237	NA	3	11.73	9.65	-2.08	NA
806	AL359762.3	1238.63	1278.6	0.0454	0.676556	NC	No	No	2	AL359762.3_exon_chr1:84498548	0.9501	0.9429	-0.0073	NA	1
807	AL359762.3									AL359762.3_exon_chr1:84556688	0.0499	0.0571	0.0073	NA	6	83.26	85.72	2.46	NA
808	SSX2IP	232.52	237.496	0.0288	1	NC	No	No	2	SSX2IP_exon_chr1:84647607	0.7148	0.7366	0.0219	NA	13	61.02	59.19	-1.83	NA
809	SSX2IP									SSX2IP_exon_chr1:84664552	0.2708	0.2503	-0.0205	NA	1
810	LPAR3	59.5775	67.2136	0.161	1	NC	No	No	1	LPAR3_exon_chr1:84814171	1	1	0	NA	1
811	MCOLN2	31.294	38.1111	0.2798	1	NC	No	No	1	MCOLN2_exon_chr1:84926721	1	1	0	NA	1
812	MCOLN3	44.6788	37.8433	-0.2508	1	NC	No	No	1	MCOLN3_exon_chr1:85019257	1	1	0	NA	4	83.02	80.23	-2.79	NA
813	C1orf52	90.4644	90.2379	0.0057	1	NC	No	No	1	C1orf52_exon_chr1:85252702	1	1	0	NA	7	26.85	25.18	-1.67	NA
814	BCL10	30.8169	45.0616	0.5369	1	NC	No	No	1	BCL10_exon_chr1:85267982	1	1	0	NA	1
815	DDAH1	75.1364	87.8369	0.2259	0.796549	NC	No	No	1	DDAH1_exon_chr1:85321568	1	1	0	NA	1
816	CCN1	256.289	421.555	0.7167	2.21184e-07	UP	No	No	1	CCN1_exon_chr1:85582739	1	1	0	NA	1
817	ZNHIT6	187.873	197.28	0.0701	0.997468	NC	No	No	2	ZNHIT6_exon_chr1:85654098	0.5278	0.5189	-0.0089	NA	7	5.39	8.22	2.83	NA
818	ZNHIT6									ZNHIT6_exon_chr1:85708433	0.4679	0.4776	0.0097	NA	4	39.51	34.2	-5.31	NA
819	ODF2L	131.879	150.568	0.1927	0.617321	NC	No	No	2	ODF2L_exon_chr1:86352208	0.6	0.6262	0.0262	NA	7	53.42	58.52	5.1	NA
820	ODF2L									ODF2L_exon_chr1:86358891	0.3522	0.3401	-0.0121	NA	1
821	SH3GLB1	138.245	164.154	0.2462	0.425714	NC	No	No	1	SH3GLB1_exon_chr1:86743127	1	1	0	NA	9	24.41	26.01	1.6	NA
822	AL049597.1	44.7845	52.337	0.221	1	NC	No	No	1	AL049597.1_exon_chr1:86784912	1	1	0	NA	1
823	SELENOF	831.612	902.195	0.1171	0.344669	NC	No	No	1	SELENOF_exon_chr1:86863605	1	1	0	NA	5	29.48	30.33	0.85	NA
824	HS2ST1	146.755	156.605	0.0975	0.893563	NC	No	No	1	HS2ST1_exon_chr1:87104469	1	1	0	NA	13	42.45	34.24	-8.21	NA
825	LMO4	169.786	208.443	0.2927	0.252656	NC	No	No	1	LMO4_exon_chr1:87344787	1	1	0	NA	8	66.35	64.8	-1.54	NA
826	PKN2	134.965	146.716	0.1133	0.886548	NC	No	No	2	PKN2_exon_chr1:88740987	0.1778	0.1542	-0.0236	NA	2	44.19	42.51	-1.69	NA
827	PKN2									PKN2_exon_chr1:88833244	0.8222	0.8458	0.0236	NA	8	82.26	83.26	1	NA
828	GTF2B	103.222	123.5	0.2614	0.531986	NC	No	No	1	GTF2B_exon_chr1:88853346	1	1	0	NA	4	9.27	11.94	2.66	NA
829	KYAT3	58.6379	57.0863	-0.0351	1	NC	No	No	1	KYAT3_exon_chr1:88936245	1	1	0	NA	2	87.92	79.57	-8.35	NA
830	RBMXL1	48.1081	58.1701	0.2751	1	NC	No	No	1	RBMXL1_exon_chr1:88984066	1	1	0	NA	6	43.66	43.88	0.22	NA
831	LRRC8B	28.1538	42.2533	0.5927	1	NC	No	No	1	LRRC8B_exon_chr1:89592770	1	1	0	NA	6	58.88	61.54	2.66	NA
832	LRRC8C	80.4955	100.062	0.3092	0.523024	NC	No	No	1	LRRC8C_exon_chr1:89712708	1	1	0	NA	4	58.64	51.28	-7.36	NA
833	AC093423.3	31.16	41.6158	0.4106	1	NC	No	No	1	AC093423.3_exon_chr1:89933066	1	1	0	NA	2	10.17	11.54	1.37	NA
834	ZNF326	460.8	493.59	0.0966	0.563386	NC	No	No	4	ZNF326_exon_chr1:90010087	0.0618	0.0535	-0.0083	NA	1
835	ZNF326									ZNF326_exon_chr1:90013125	0.2503	0.2444	-0.0059	NA	2	54.25	53.43	-0.81	NA
836	ZNF326									ZNF326_exon_chr1:90017316	0.2661	0.2343	-0.0318	NA	1
837	ZNF326									ZNF326_exon_chr1:90027353	0.4165	0.4613	0.0448	NA	11	17.85	16.42	-1.43	NA
838	LINC02609	15.7481	12.6443	-0.325	1	NC	No	No	2	LINC02609_exon_chr1:90783423	0.2147	0.2853	0.0707	NA	2	30.45	50.32	19.87	NA
839	LINC02609									LINC02609_exon_chr1:90832201	0.7853	0.7147	-0.0707	NA	5	25.49	19.81	-5.69	NA
840	ZNF644	260.953	276.955	0.0873	0.906783	NC	No	No	3	ZNF644_exon_chr1:90916990	0.6074	0.6117	0.0043	NA	7	59.54	60.93	1.39	NA
841	ZNF644									ZNF644_exon_chr1:90938090	0.1852	0.1769	-0.0082	NA	1
842	ZNF644									ZNF644_exon_chr1:90941309	0.1677	0.1915	0.0238	NA	3	31.74	38.11	6.36	NA
843	CDC7	59.2388	73.7321	0.2971	1	NC	No	No	2	CDC7_exon_chr1:91513057	0.2157	0.1527	-0.063	NA	1
844	CDC7									CDC7_exon_chr1:91524040	0.7843	0.8473	0.063	NA	4	64.09	65.44	1.35	NA
845	TGFBR3	22.0351	30.3888	0.4751	1	NC	No	No	1	TGFBR3_exon_chr1:91683857	1	1	0	NA	1
846	EPHX4	10.021	12.908	0.4146	1	NC	No	No	1	EPHX4_exon_chr1:92063054	1	1	0	NA	3	35.54	34.34	-1.2	NA
847	SETSIP	13.523	9.826	-0.4906	1	NC	No	No	1	SETSIP_exon_chr1:92075441	1	1	0	NA	1
848	GLMN	112.787	138.243	0.2862	0.423082	NC	No	No	1	GLMN_exon_chr1:92246646	1	1	0	NA	1
849	RPAP2	118.283	121.735	0.0388	1	NC	No	No	1	RPAP2_exon_chr1:92387010	1	1	0	NA	15	22.1	23.4	1.3	NA
850	GFI1	51.1799	61.5734	0.2678	1	NC	No	No	1	GFI1_exon_chr1:92476207	1	1	0	NA	1
851	EVI5	58.836	60.2611	0.0444	1	NC	No	No	2	EVI5_exon_chr1:92513970	0.7899	0.8106	0.0207	NA	2	66.82	48.43	-18.39	NA
852	EVI5									EVI5_exon_chr1:92704744	0.2101	0.1894	-0.0207	NA	1
853	RPL5	24895.8	22776.7	-0.1282	0.0435338	NC	No	No	2	RPL5_exon_chr1:92840524	0.4094	0.3874	-0.022	NA	1
854	RPL5									RPL5_exon_chr1:92841765	0.5891	0.6106	0.0216	NA	1
855	DIPK1A	24.0442	27.7248	0.163	1	NC	No	No	1	DIPK1A_exon_chr1:92844195	1	1	0	NA	7	76.8	82.06	5.26	NA
856	MTF2	117.595	166.678	0.4976	0.0490388	UP	No	No	2	MTF2_exon_chr1:93133702	0.2385	0.2259	-0.0126	NA	1
857	MTF2									MTF2_exon_chr1:93136669	0.7615	0.7741	0.0126	NA	8	44.77	47.42	2.65	NA
858	TMED5	275.541	291.468	0.0795	0.877128	NC	No	No	1	TMED5_exon_chr1:93154888	1	1	0	NA	8	55.07	53.22	-1.85	NA
859	CCDC18	340.025	319.183	-0.0892	0.682417	NC	No	No	7	CCDC18_exon_chr1:93201891	0.0537	0.0961	0.0424	NA	2	29.74	29.8	0.05	NA
860	CCDC18									CCDC18_exon_chr1:93205509	0.1153	0.0915	-0.0238	NA	1
861	CCDC18									CCDC18_exon_chr1:93207106	0.1123	0.1461	0.0338	NA	1
862	CCDC18									CCDC18_exon_chr1:93221608	0.164	0.1591	-0.0049	NA	2	92.95	96.89	3.95	NA
863	CCDC18									CCDC18_exon_chr1:93236247	0.1383	0.1286	-0.0096	NA	3	41.75	34.02	-7.73	NA
864	CCDC18									CCDC18_exon_chr1:93239309	0.172	0.1631	-0.009	NA	2	30.69	22.9	-7.79	NA
865	CCDC18									CCDC18_exon_chr1:93264700	0.0863	0.0715	-0.0148	NA	1
866	DR1	278.321	287.894	0.0424	1	NC	No	No	1	DR1_exon_chr1:93360492	1	1	0	NA	21	34.19	37.08	2.88	NA
867	FNBP1L	104.98	119.834	0.1891	0.727348	NC	No	No	3	FNBP1L_exon_chr1:93524260	0.1691	0.1359	-0.0331	NA	1
868	FNBP1L									FNBP1L_exon_chr1:93530754	0.2757	0.2038	-0.0719	NA	1
869	FNBP1L									FNBP1L_exon_chr1:93550946	0.5202	0.648	0.1278	NA	1
870	BCAR3	79.403	73.7837	-0.1049	1	NC	No	No	1	BCAR3_exon_chr1:93562419	1	1	0	NA	1
871	DNTTIP2	745.823	826.537	0.1473	0.274761	NC	No	No	3	DNTTIP2_exon_chr1:93869944	0.5572	0.5554	-0.0018	NA	1
872	DNTTIP2									DNTTIP2_exon_chr1:93872236	0.0837	0.0853	0.0017	NA	3	82.13	81.96	-0.17	NA
873	DNTTIP2									DNTTIP2_exon_chr1:93877883	0.2754	0.2734	-0.002	NA	4	84.15	84.82	0.66	NA
874	GCLM	181.371	198.99	0.1376	0.803053	NC	No	No	1	GCLM_exon_chr1:93889159	1	1	0	NA	14	35.02	34.68	-0.34	NA
875	ARHGAP29	1482.42	1299.23	-0.1899	0.460197	NC	No	No	3	ARHGAP29_exon_chr1:94174749	0.105	0.1308	0.0258	NA	23	33.39	30.55	-2.84	NA
876	ARHGAP29									ARHGAP29_exon_chr1:94202732	0.6192	0.6086	-0.0106	NA	3	85.5	86.34	0.84	NA
877	ARHGAP29									ARHGAP29_exon_chr1:94202998	0.2157	0.2206	0.0048	NA	1
878	ABCD3	209.216	206.147	-0.0223	1	NC	No	No	2	ABCD3_exon_chr1:94478523	0.1851	0.2049	0.0198	NA	1
879	ABCD3									ABCD3_exon_chr1:94517051	0.8149	0.7951	-0.0198	NA	5	45.35	36.52	-8.83	NA
880	F3	139.964	132.476	-0.0673	1	NC	No	No	1	F3_exon_chr1:94530596	1	1	0	NA	1
881	SLC44A3	27.2851	29.0002	0.1139	1	NC	No	No	1	SLC44A3_exon_chr1:94894817	1	1	0	NA	1
882	CNN3	367.637	421.212	0.1988	0.233625	NC	No	No	1	CNN3_exon_chr1:94898083	1	1	0	NA	4	51.74	52.61	0.87	NA
883	ALG14	44.1998	50.1772	0.1888	1	NC	No	No	1	ALG14_exon_chr1:94983633	1	1	0	NA	3	84.71	86.91	2.2	NA
884	TLCD4	81.6212	86.8683	0.0922	1	NC	No	No	1	TLCD4_exon_chr1:95191549	1	1	0	NA	13	48.89	47.05	-1.83	NA
885	RWDD3	76.6061	95.9138	0.3213	0.529196	NC	No	No	1	RWDD3_exon_chr1:95246755	1	1	0	NA	1
886	EEF1A1P11	33.6077	32.1539	-0.0481	1	NC	No	No	1	EEF1A1P11_exon_chr1:96446929	1	1	0	NA	2	56.59	57.16	0.57	NA
887	RPL7P9	13.721	12.4262	-0.1066	1	NC	No	No	1	RPL7P9_exon_chr1:96679620	1	1	0	NA	1
888	PTBP2	45.1669	49.2508	0.1287	1	NC	No	No	1	PTBP2_exon_chr1:96813272	1	1	0	NA	1
889	SEC63P1	30.6111	18.1377	-0.7781	1	NC	No	No	1	SEC63P1_exon_chr1:97545700	1	1	0	NA	2	69.7	64.3	-5.4	NA
890	SNX7	68.6597	55.8142	-0.2837	1	NC	No	No	1	SNX7_exon_chr1:98760053	1	1	0	NA	1
891	AGL	148.052	171.603	0.2124	0.520141	NC	No	No	3	AGL_exon_chr1:99864385	0.3582	0.3152	-0.043	NA	1
892	AGL									AGL_exon_chr1:99912404	0.0751	0.0828	0.0077	NA	1
893	AGL									AGL_exon_chr1:99921533	0.5667	0.602	0.0353	NA	3	83.04	79.17	-3.86	NA
894	SLC35A3	65.6752	77.3843	0.2589	0.83275	NC	No	No	1	SLC35A3_exon_chr1:100022385	1	1	0	NA	8	74.54	70.87	-3.67	NA
895	AC118553.2	80.9282	104.797	0.3713	0.398385	NC	No	No	1	AC118553.2_exon_chr1:100082002	1	1	0	NA	2	77.47	81.43	3.96	NA
896	AC093019.2	38.1161	54.4503	0.5142	0.594046	NC	No	No	1	AC093019.2_exon_chr1:100085434	1	1	0	NA	1
897	SASS6	82.5942	109.268	0.4137	0.359814	NC	No	No	3	SASS6_exon_chr1:100107553	0.5576	0.4858	-0.0718	NA	1
898	SASS6									SASS6_exon_chr1:100110483	0.2098	0.2905	0.0806	NA	2	26.27	18.68	-7.59	NA
899	SASS6									SASS6_exon_chr1:100119137	0.2019	0.1872	-0.0147	NA	1
900	TRMT13	27.6725	44.5554	0.6661	1	NC	No	No	1	TRMT13_exon_chr1:100148624	1	1	0	NA	7	88.03	90.78	2.75	NA
901	DBT	67.2029	66.1297	-0.0345	1	NC	No	No	1	DBT_exon_chr1:100196422	1	1	0	NA	11	26.62	23.17	-3.45	NA
902	RTCA	234.534	263.191	0.1685	0.544651	NC	No	No	1	RTCA_exon_chr1:100291402	1	1	0	NA	3	23.36	16.14	-7.23	NA
903	CDC14A	10.2447	7.6423	-0.3551	1	NC	No	No	1	CDC14A_exon_chr1:100518250	1	1	0	NA	2	73.22	88.34	15.12	NA
904	EXTL2	36.4961	28.9461	-0.3376	1	NC	No	No	1	EXTL2_exon_chr1:100874430	1	1	0	NA	4	65.77	70.43	4.66	NA
905	AC104506.1	9.2554	6.1684	-0.6252	1	NC	No	No	1	AC104506.1_exon_chr1:100894927	1	1	0	NA	1
906	SLC30A7	62.3012	85.4132	0.4628	0.366901	NC	No	No	1	SLC30A7_exon_chr1:100974809	1	1	0	NA	7	59.71	70.38	10.67	NA
907	DPH5	123.675	114.304	-0.1246	0.995521	NC	No	No	1	DPH5_exon_chr1:100990631	1	1	0	NA	2	41.96	37.58	-4.38	NA
908	AC093157.1	52.8801	41.6306	-0.357	1	NC	No	No	1	AC093157.1_exon_chr1:101086851	1	1	0	NA	1
909	RPSAP19	27138	25557.8	-0.0864	0.24589	NC	No	No	1	RPSAP19_exon_chr1:101787219	1	1	0	NA	1
910	AMY2B	17.7564	17.3234	-0.0552	1	NC	No	No	2	AMY2B_exon_chr1:103553273	0.9544	0.9156	-0.0388	NA	1
911	AMY2B									AMY2B_exon_chr1:103579310	0.0456	0.0844	0.0388	NA	1
912	PRMT6	28.334	23.4362	-0.2546	1	NC	No	No	1	PRMT6_exon_chr1:107056673	1	1	0	NA	2	84.98	86.38	1.4	NA
913	SLC25A24	149.696	162.387	0.1244	0.872159	NC	No	No	2	SLC25A24_exon_chr1:108136837	0.8342	0.7982	-0.036	NA	1
914	SLC25A24									SLC25A24_exon_chr1:108185954	0.1551	0.1959	0.0408	NA	1
915	FAM102B	28.0942	28.7847	0.0234	1	NC	No	No	1	FAM102B_exon_chr1:108635107	1	1	0	NA	1
916	PRPF38B	2830.48	2680.56	-0.0784	0.582551	NC	No	No	1	PRPF38B_exon_chr1:108699161	1	1	0	NA	20	45.53	45.25	-0.27	NA
917	STXBP3	105.212	131.923	0.3255	0.320267	NC	No	No	1	STXBP3_exon_chr1:108808782	1	1	0	NA	1
918	GPSM2	326.64	311.708	-0.0726	0.710159	NC	No	No	2	GPSM2_exon_chr1:108923999	0.0832	0.0473	-0.0359	NA	1
919	GPSM2									GPSM2_exon_chr1:108929700	0.9091	0.9473	0.0382	NA	8	8.26	6.22	-2.04	NA
920	CLCC1	39.5586	43.4812	0.1226	1	NC	No	No	2	CLCC1_exon_chr1:108932501	0.8944	0.9643	0.0699	NA	3	31.99	29.22	-2.77	NA
921	CLCC1									CLCC1_exon_chr1:108947718	0.1056	0.0357	-0.0699	NA	1
922	WDR47	28.3742	29.5508	0.0524	1	NC	No	No	1	WDR47_exon_chr1:108971572	1	1	0	NA	1
923	BX679664.3	11679.7	11468.1	-0.0268	0.76752	NC	No	No	1	BX679664.3_exon_chr1:108992281	1	1	0	NA	1
924	TAF13	244.236	351.551	0.529	0.00627739	UP	No	No	2	TAF13_exon_chr1:109063072	0.9354	0.9454	0.0099	NA	1
925	TAF13									TAF13_exon_chr1:109075065	0.0561	0.0492	-0.0069	NA	1
926	TMEM167B	58.7674	69.148	0.2317	1	NC	No	No	1	TMEM167B_exon_chr1:109094416	1	1	0	NA	3	80.46	82.32	1.86	NA
927	SARS	1254.29	1200.63	-0.0652	0.603439	NC	No	No	2	SARS_exon_chr1:109223977	0.1296	0.1142	-0.0154	NA	1
928	SARS									SARS_exon_chr1:109237730	0.851	0.8654	0.0144	NA	1
929	CELSR2	17.4475	20.7062	0.2529	1	NC	No	No	1	CELSR2_exon_chr1:109273165	1	1	0	NA	1
930	PSRC1	160.883	176.889	0.1291	0.875876	NC	No	No	2	PSRC1_exon_chr1:109280156	0.9464	0.9436	-0.0028	NA	1
931	PSRC1									PSRC1_exon_chr1:109282419	0.0536	0.0564	0.0028	NA	1
932	SORT1	106.541	117.441	0.1533	0.782023	NC	No	No	1	SORT1_exon_chr1:109314057	1	1	0	NA	5	65.6	65.67	0.08	NA
933	PSMA5	722.843	776.074	0.1048	0.537622	NC	No	No	1	PSMA5_exon_chr1:109402090	1	1	0	NA	1
934	SYPL2	10.8285	10.4538	-0.0004	1	NC	No	No	1	SYPL2_exon_chr1:109479377	1	1	0	NA	1
935	CYB561D1	67.6936	70.8884	0.0476	1	NC	No	No	1	CYB561D1_exon_chr1:109495678	1	1	0	NA	1
936	AL355310.1	484.109	482.467	-0.0058	0.896439	NC	No	No	1	AL355310.1_exon_chr1:109592344	1	1	0	NA	17	49.27	48.78	-0.5	NA
937	AMPD2	124.617	128.625	0.0601	1	NC	No	No	1	AMPD2_exon_chr1:109630942	1	1	0	NA	1
938	GSTM4	54.657	41.6208	-0.3817	0.896859	NC	No	No	2	GSTM4_exon_chr1:109658999	0.8618	0.8326	-0.0292	NA	1
939	GSTM4									GSTM4_exon_chr1:109665010	0.1382	0.1674	0.0292	NA	1
940	GSTM2	8.7758	14.3392	0.6757	1	NC	No	No	1	GSTM2_exon_chr1:109674746	1	1	0	NA	1
941	GSTM1	8.3447	13.3703	0.6481	1	NC	No	No	1	GSTM1_exon_chr1:109693205	1	1	0	NA	1
942	CSF1	13.6245	20.5917	0.6263	1	NC	No	No	1	CSF1_exon_chr1:109928851	1	1	0	NA	1
943	AHCYL1	1052.95	1072.66	0.0284	0.718655	NC	No	No	1	AHCYL1_exon_chr1:110021673	1	1	0	NA	1
944	STRIP1	79.2644	99.4885	0.3366	0.498715	NC	No	No	1	STRIP1_exon_chr1:110053664	1	1	0	NA	1
945	AL160006.1	44.6847	44.0184	-0.0107	1	NC	No	No	1	AL160006.1_exon_chr1:110058339	1	1	0	NA	1
946	SLC6A17	21.0015	33.0386	0.6315	1	NC	No	No	1	SLC6A17_exon_chr1:110198075	1	1	0	NA	2	71.21	76.78	5.57	NA
947	KCNC4	24.7288	17.3234	-0.5365	1	NC	No	No	2	KCNC4_exon_chr1:110219715	0.1881	0.1251	-0.063	NA	2	88.97	66.9	-22.07	NA
948	KCNC4									KCNC4_exon_chr1:110232220	0.8119	0.8749	0.063	NA	4	32.71	32.49	-0.22	NA
949	RBM15	38.7809	46.3899	0.2563	1	NC	No	No	1	RBM15_exon_chr1:110346307	1	1	0	NA	1
950	LAMTOR5-AS1	12.503	10.8362	-0.1968	1	NC	No	No	2	LAMTOR5-AS1_exon_chr1:110347115	0.2967	0.2988	0.0021	NA	1
951	LAMTOR5-AS1									LAMTOR5-AS1_exon_chr1:110415609	0.7033	0.7012	-0.0021	NA	1
952	AL355488.1	7.8864	11.2847	0.5153	1	NC	No	No	1	AL355488.1_exon_chr1:110370153	1	1	0	NA	1
953	LAMTOR5	1280.74	1414.75	0.1442	0.184291	NC	No	No	1	LAMTOR5_exon_chr1:110401583	1	1	0	NA	1
954	LRIF1	57.7896	58.1205	0.027	1	NC	No	No	1	LRIF1_exon_chr1:110948399	1	1	0	NA	6	92.46	98.67	6.22	NA
955	DRAM2	149.349	147.659	-0.0136	1	NC	No	No	2	DRAM2_exon_chr1:111118267	0.9593	0.9372	-0.0221	NA	5	49.93	51.16	1.23	NA
956	DRAM2									DRAM2_exon_chr1:111125650	0.0407	0.0628	0.0221	NA	1
957	CEPT1	104.238	102.213	-0.0278	1	NC	No	No	2	CEPT1_exon_chr1:111147641	0.1935	0.2724	0.0789	NA	1
958	CEPT1									CEPT1_exon_chr1:111184190	0.8065	0.7276	-0.0789	NA	4	71.08	72.05	0.97	NA
959	DENND2D	138.1	98.9962	-0.468	0.0894351	NC	No	No	1	DENND2D_exon_chr1:111187681	1	1	0	NA	1
960	PIFO	5.3498	9.151	0.7566	1	NC	No	No	1	PIFO_exon_chr1:111351258	1	1	0	NA	3	33.9	25.42	-8.48	NA
961	OVGP1	38.7323	59.4	0.6131	0.408693	NC	No	No	1	OVGP1_exon_chr1:111415344	1	1	0	NA	1
962	AL390195.1	536.75	470.673	-0.1871	0.224235	NC	No	No	1	AL390195.1_exon_chr1:111441389	1	1	0	NA	10	59.22	55.44	-3.78	NA
963	ATP5PB	688.366	646.188	-0.0871	0.580505	NC	No	No	1	ATP5PB_exon_chr1:111460916	1	1	0	NA	6	29.92	31.07	1.15	NA
964	RAP1A	208.951	258.68	0.2999	0.213208	NC	No	No	1	RAP1A_exon_chr1:111712430	1	1	0	NA	8	46.15	45.57	-0.58	NA
965	INKA2	14.4328	7.0489	-1.0313	1	NC	No	No	1	INKA2_exon_chr1:111727831	1	1	0	NA	6	60.61	39.95	-20.65	NA
966	DDX20	162.945	137.727	-0.2436	0.428533	NC	No	No	1	DDX20_exon_chr1:111765736	1	1	0	NA	4	17.54	19.8	2.25	NA
967	CTTNBP2NL	134.137	128.862	-0.0405	1	NC	No	No	1	CTTNBP2NL_exon_chr1:112455930	1	1	0	NA	11	30.56	36.76	6.2	NA
968	ST7L	26.3264	25.9137	-0.0254	1	NC	No	No	4	ST7L_exon_chr1:112526111	0.5123	0.467	-0.0452	NA	6	37.5	25.63	-11.87	NA
969	ST7L									ST7L_exon_chr1:112542090	0.1428	0.1339	-0.0089	NA	2	69.05	60.79	-8.25	NA
970	ST7L									ST7L_exon_chr1:112607597	0.0618	0.0455	-0.0162	NA	1
971	ST7L									ST7L_exon_chr1:112611003	0.2524	0.3161	0.0637	NA	1
972	WNT2B	6.5942	6.6073	-0.0718	1	NC	No	No	2	WNT2B_exon_chr1:112516139	0.124	0.0503	-0.0737	NA	4	90.43	29.96	-60.47	NA
973	WNT2B									WNT2B_exon_chr1:112520279	0.876	0.9497	0.0737	NA	1
974	CAPZA1	402.991	442.726	0.1329	0.440839	NC	No	No	1	CAPZA1_exon_chr1:112669991	1	1	0	NA	4	73.99	77.23	3.24	NA
975	MOV10	1494.9	1448.38	-0.0451	0.668864	NC	No	No	1	MOV10_exon_chr1:112698286	1	1	0	NA	1
976	RHOC	818.009	847.016	0.0498	0.714291	NC	No	No	1	RHOC_exon_chr1:112701713	1	1	0	NA	1
977	PPM1J	60.9167	63.9821	0.0944	1	NC	No	No	1	PPM1J_exon_chr1:112710310	1	1	0	NA	1
978	TAFA3	13.1893	22.0602	0.7499	1	NC	No	No	1	TAFA3_exon_chr1:112726628	1	1	0	NA	1
979	SLC16A1	614.425	592.469	-0.0482	0.761323	NC	No	No	1	SLC16A1_exon_chr1:112914165	1	1	0	NA	7	75.99	74.94	-1.05	NA
980	SLC16A1-AS1	30.332	34.3773	0.1753	1	NC	No	No	1	SLC16A1-AS1_exon_chr1:112963971	1	1	0	NA	1
981	LRIG2	43.7535	44.6104	0.0045	1	NC	No	No	1	LRIG2_exon_chr1:113123874	1	1	0	NA	5	29.39	22.07	-7.33	NA
982	MAGI3	36.9075	29.5082	-0.3038	1	NC	No	No	3	MAGI3_exon_chr1:113403654	0.1116	0.2325	0.1209	NA	1
983	MAGI3									MAGI3_exon_chr1:113619735	0.0337	0.0876	0.0539	NA	1
984	MAGI3									MAGI3_exon_chr1:113682896	0.8547	0.6799	-0.1749	NA	8	73.36	66.07	-7.29	NA
985	PHTF1	32.4335	38.1527	0.2015	1	NC	No	No	2	PHTF1_exon_chr1:113697725	0.2143	0.3412	0.1269	NA	1
986	PHTF1									PHTF1_exon_chr1:113706162	0.6974	0.6008	-0.0966	NA	1
987	AL133517.1	13.721	15.4185	0.1578	1	NC	No	No	1	AL133517.1_exon_chr1:113700243	1	1	0	NA	1
988	RSBN1	20.6183	19.1892	-0.0893	1	NC	No	No	1	RSBN1_exon_chr1:113766453	1	1	0	NA	3	66.37	66.86	0.49	NA
989	AP4B1	112.103	132.689	0.2558	0.60156	NC	No	No	1	AP4B1_exon_chr1:113897975	1	1	0	NA	1
990	DCLRE1B	30.3884	37.2787	0.2958	1	NC	No	No	1	DCLRE1B_exon_chr1:113911130	1	1	0	NA	4	70.58	63.04	-7.54	NA
991	HIPK1	100.198	139.837	0.483	0.0666496	NC	No	No	1	HIPK1_exon_chr1:113973023	1	1	0	NA	1
992	TRIM33	101.967	93.9346	-0.1133	1	NC	No	No	3	TRIM33_exon_chr1:114397990	0.8122	0.7635	-0.0487	NA	6	59.08	50.95	-8.13	NA
993	TRIM33									TRIM33_exon_chr1:114399609	0.065	0.0797	0.0147	NA	1
994	TRIM33									TRIM33_exon_chr1:114430912	0.1228	0.1568	0.034	NA	1
995	BCAS2	294.745	340.443	0.2102	0.218416	NC	No	No	1	BCAS2_exon_chr1:114568256	1	1	0	NA	6	69.29	64.62	-4.68	NA
996	DENND2C	9.2076	15.0294	0.7144	1	NC	No	No	1	DENND2C_exon_chr1:114585631	1	1	0	NA	1
997	NRAS	287.171	333.029	0.2096	0.271632	NC	No	No	1	NRAS_exon_chr1:114708050	1	1	0	NA	7	88.48	85.01	-3.47	NA
998	CSDE1	2046.52	1870.4	-0.1294	0.191903	NC	No	No	1	CSDE1_exon_chr1:114718216	1	1	0	NA	8	83.18	79.9	-3.27	NA
999	SIKE1	175.704	197.31	0.1569	0.682199	NC	No	No	2	SIKE1_exon_chr1:114774372	0.7531	0.8334	0.0803	NA	7	90.61	90.56	-0.05	NA
1000	SIKE1									SIKE1_exon_chr1:114779284	0.2469	0.1666	-0.0803	NA	1
1001	VANGL1	93.0829	90.7133	-0.0202	1	NC	No	No	1	VANGL1_exon_chr1:115691118	1	1	0	NA	6	42.25	42.17	-0.08	NA
1002	ATP1A1	2301.12	2296.99	-0.0011	0.873974	NC	No	No	1	ATP1A1_exon_chr1:116404415	1	1	0	NA	1
1003	RNU6-817P	13.1851	8.0025	-0.7136	1	NC	No	No	1	RNU6-817P_exon_chr1:116413869	1	1	0	NA	1
1004	CD58	40.0501	41.5026	0.0283	1	NC	No	No	2	CD58_exon_chr1:116514822	0.7844	0.7378	-0.0465	NA	1
1005	CD58									CD58_exon_chr1:116521983	0.2049	0.2622	0.0573	NA	1
1006	IGSF3	82.91	106.257	0.3671	0.503468	NC	No	No	1	IGSF3_exon_chr1:116577562	1	1	0	NA	4	90.63	90.47	-0.16	NA
1007	PTGFRN	160.68	161.074	0.0076	1	NC	No	No	1	PTGFRN_exon_chr1:116986800	1	1	0	NA	3	67.71	65.54	-2.17	NA
1008	TTF2	164.325	131.599	-0.3263	0.252855	NC	No	No	2	TTF2_exon_chr1:117074869	0.4522	0.3882	-0.0639	NA	2	23.53	33.41	9.88	NA
1009	TTF2									TTF2_exon_chr1:117101379	0.5255	0.5841	0.0586	NA	9	22.18	22.35	0.16	NA
1010	TRIM45	17.4789	5.6769	-1.5989	0.507632	NC	No	No	1	TRIM45_exon_chr1:117112453	1	1	0	NA	2	79.75	86.22	6.48	NA
1011	MAN1A2	542.013	621.126	0.1983	0.192576	NC	No	No	2	MAN1A2_exon_chr1:117402185	0.8343	0.8537	0.0194	NA	2	43.19	44.88	1.69	NA
1012	MAN1A2									MAN1A2_exon_chr1:117522824	0.1657	0.1463	-0.0194	NA	10	58.22	67.12	8.9	NA
1013	TENT5C	13.1868	23.0511	0.8131	1	NC	No	No	1	TENT5C_exon_chr1:117622841	1	1	0	NA	4	74.56	88.67	14.11	NA
1014	PNRC2P1	45.6013	50.6452	0.1243	1	NC	No	No	1	PNRC2P1_exon_chr1:117778506	1	1	0	NA	1
1015	GDAP2	44.3842	50.8881	0.1764	1	NC	No	No	2	GDAP2_exon_chr1:117870616	0.9434	0.8049	-0.1385	NA	8	66.61	56.84	-9.77	NA
1016	GDAP2									GDAP2_exon_chr1:117878152	0.0377	0.1536	0.1159	NA	1
1017	WDR3	235.82	251.377	0.0939	0.847365	NC	No	No	2	WDR3_exon_chr1:117941749	0.1925	0.151	-0.0415	NA	1
1018	WDR3									WDR3_exon_chr1:117959291	0.8075	0.849	0.0415	NA	6	26.61	25.42	-1.19	NA
1019	WARS2	60.6343	49.7822	-0.3077	1	NC	No	No	1	WARS2_exon_chr1:119033388	1	1	0	NA	3	19.4	19.81	0.41	NA
1020	RBMX2P3	9.1044	9.6271	0.132	1	NC	No	No	1	RBMX2P3_exon_chr1:119085954	1	1	0	NA	1
1021	WARS2-AS1	16.2039	17.3827	0.1423	1	NC	No	No	1	WARS2-AS1_exon_chr1:119178643	1	1	0	NA	2	79.04	88.41	9.37	NA
1022	ZNF697	14.0232	19.3358	0.4776	1	NC	No	No	1	ZNF697_exon_chr1:119624116	1	1	0	NA	5	88.17	92.78	4.61	NA
1023	PHGDH	905.965	919.754	0.0198	0.773857	NC	No	No	1	PHGDH_exon_chr1:119743866	1	1	0	NA	1
1024	NOTCH2	285.739	319.814	0.1661	0.508454	NC	No	No	2	NOTCH2_exon_chr1:119916694	0.5796	0.5693	-0.0104	NA	6	91.75	90.92	-0.84	NA
1025	NOTCH2									NOTCH2_exon_chr1:119996746	0.4204	0.4307	0.0104	NA	1
1026	SEC22B	466.442	461.12	-0.0181	0.85676	NC	No	No	1	SEC22B_exon_chr1:120159402	1	1	0	NA	14	79.48	76.91	-2.57	NA
1027	AC244669.1	81.1518	70.0133	-0.2155	0.853451	NC	No	No	1	AC244669.1_exon_chr1:120267838	1	1	0	NA	1
1028	NBPF8	206.751	225.164	0.1231	0.772115	NC	No	No	2	NBPF8_exon_chr1:120465262	0.6	0.6222	0.0222	NA	1
1029	NBPF8									NBPF8_exon_chr1:120465977	0.4	0.3778	-0.0222	NA	2	25.29	23.08	-2.21	NA
1030	AC241952.1	29.01	27.3849	-0.0854	1	NC	No	No	1	AC241952.1_exon_chr1:120536402	1	1	0	NA	2	92.62	96.16	3.55	NA
1031	AC253572.1	145.877	167.945	0.1982	0.597967	NC	No	No	1	AC253572.1_exon_chr1:120793746	1	1	0	NA	1
1032	NBPF26	25.344	24.6661	-0.0155	1	NC	No	No	1	NBPF26_exon_chr1:120840349	1	1	0	NA	2	57.06	64.26	7.2	NA
1033	AC241377.3	12.148	7.3457	-0.738	1	NC	No	No	1	AC241377.3_exon_chr1:120914238	1	1	0	NA	1
1034	LINC00623	30.682	41.4856	0.4327	1	NC	No	No	1	LINC00623_exon_chr1:120952438	1	1	0	NA	1
1035	FAM72B	136.846	164.353	0.2775	0.404055	NC	No	No	1	FAM72B_exon_chr1:121168835	1	1	0	NA	4	67	60.91	-6.08	NA
1036	SRGAP2C	39.3194	47.0895	0.2468	1	NC	No	No	1	SRGAP2C_exon_chr1:121387633	1	1	0	NA	5	62.63	47.95	-14.68	NA
1037	FAM72C	117.137	153.239	0.4034	0.190787	NC	No	No	1	FAM72C_exon_chr1:143956481	1	1	0	NA	4	66.11	61.83	-4.28	NA
1038	LINC02802	52.4548	62.9552	0.2589	1	NC	No	No	1	LINC02802_exon_chr1:144227379	1	1	0	NA	1
1039	NBPF15	74.595	80.3035	0.0958	1	NC	No	No	1	NBPF15_exon_chr1:144423256	1	1	0	NA	2	16.07	18.28	2.21	NA
1040	U1	75.7549	70.4458	-0.1018	1	NC	No	No	5	U1_exon_chr1:144560829	0.1265	0.1464	0.0199	NA	2	75	86.92	11.92	NA
1041	U1									U1_exon_chr1:146376806	0.4445	0.4378	-0.0067	NA	2	77.78	78.67	0.89	NA
1042	U1									U1_exon_chr1:149636765	0.0938	0.0722	-0.0216	NA	1
1043	U1									U1_exon_chr1:KI270713v1	0.2308	0.2165	-0.0143	NA	3	61.66	75.3	13.65	NA
1044	U1									U1_exon_chr1:KI270765v1	0.1045	0.1196	0.0152	NA	1
1045	SRGAP2B	65.2824	70.6265	0.1044	1	NC	No	No	1	SRGAP2B_exon_chr1:144892381	1	1	0	NA	7	59.65	42.76	-16.89	NA
1046	FAM72D	145.474	171.393	0.2506	0.446043	NC	No	No	1	FAM72D_exon_chr1:145111502	1	1	0	NA	4	67.55	60.46	-7.09	NA
1047	LINC01145	14.5344	10.923	-0.4627	1	NC	No	No	1	LINC01145_exon_chr1:145169086	1	1	0	NA	1
1048	AC241585.2	13.01	10.3339	-0.3456	1	NC	No	No	1	AC241585.2_exon_chr1:145214850	1	1	0	NA	1
1049	AC241585.1	6.5472	5.1938	-0.3283	1	NC	No	No	1	AC241585.1_exon_chr1:145233000	1	1	0	NA	1
1050	NBPF20	93.7469	118.534	0.3418	0.440714	NC	No	No	4	NBPF20_exon_chr1:145291769	0.4675	0.342	-0.1256	NA	3	34.96	38.87	3.92	NA
1051	NBPF20									NBPF20_exon_chr1:145292489	0.1578	0.1907	0.033	NA	1
1052	NBPF20									NBPF20_exon_chr1:145302009	0.2082	0.2582	0.05	NA	1
1053	NBPF20									NBPF20_exon_chr1:145305178	0.1665	0.209	0.0426	NA	1
1054	NBPF25P	11.1639	12.3351	0.1476	1	NC	No	No	1	NBPF25P_exon_chr1:145572933	1	1	0	NA	1
1055	GPR89A	153.376	144.387	-0.0806	1	NC	No	No	1	GPR89A_exon_chr1:145669833	1	1	0	NA	1
1056	RNF115	162.162	160.456	-0.0115	1	NC	No	No	1	RNF115_exon_chr1:145746997	1	1	0	NA	10	37.74	35.7	-2.04	NA
1057	POLR3C	266.966	212.501	-0.3203	0.212972	NC	No	No	1	POLR3C_exon_chr1:145842338	1	1	0	NA	7	26.85	30.77	3.92	NA
1058	PIAS3	50.0072	43.9492	-0.1621	1	NC	No	No	1	PIAS3_exon_chr1:145850269	1	1	0	NA	1
1059	NUDT17	22.1417	28.1635	0.3586	1	NC	No	No	1	NUDT17_exon_chr1:145848111	1	1	0	NA	1
1060	PEX11B	39.6967	35.9496	-0.1424	1	NC	No	No	1	PEX11B_exon_chr1:145912566	1	1	0	NA	1
1061	RBM8A	969.727	1060.04	0.1259	0.273642	NC	No	No	1	RBM8A_exon_chr1:145926177	1	1	0	NA	5	18.82	18.93	0.1	NA
1062	LIX1L	42.7259	41.676	-0.0462	1	NC	No	No	1	LIX1L_exon_chr1:145936552	1	1	0	NA	4	81.55	76.18	-5.37	NA
1063	AC243547.3	397.802	330.963	-0.2717	0.0944804	NC	No	No	1	AC243547.3_exon_chr1:145977482	1	1	0	NA	4	46.68	46.07	-0.61	NA
1064	NBPF10	49.4225	43.0715	-0.1799	1	NC	No	No	1	NBPF10_exon_chr1:146066561	1	1	0	NA	2	32.24	31.31	-0.93	NA
1065	NOTCH2NLA	310.505	364.212	0.2273	0.191218	NC	No	No	1	NOTCH2NLA_exon_chr1:146156229	1	1	0	NA	1
1066	SEC22B4P	53.2623	62.0508	0.2307	1	NC	No	No	1	SEC22B4P_exon_chr1:146321996	1	1	0	NA	2	29.35	27.18	-2.17	NA
1067	NBPF12	86.8685	91.2101	0.0501	1	NC	No	No	2	NBPF12_exon_chr1:146993598	0.138	0.1787	0.0407	NA	1
1068	NBPF12									NBPF12_exon_chr1:146994331	0.8142	0.7937	-0.0206	NA	2	12.15	12.18	0.03	NA
1069	PRKAB2	27.3413	24.2521	-0.1375	1	NC	No	No	1	PRKAB2_exon_chr1:147159642	1	1	0	NA	7	93.27	90.86	-2.41	NA
1070	AC242426.2	226.16	245.875	0.1245	0.776637	NC	No	No	1	AC242426.2_exon_chr1:147295430	1	1	0	NA	1
1071	PDIA3P1	11.9713	10.9426	-0.1083	1	NC	No	No	1	PDIA3P1_exon_chr1:147177892	1	1	0	NA	3	41.31	29.93	-11.38	NA
1072	CCT8P1	43.3199	39.8269	-0.1269	1	NC	No	No	1	CCT8P1_exon_chr1:147204932	1	1	0	NA	1
1073	CHD1L	27.5197	21.6491	-0.3772	1	NC	No	No	1	CHD1L_exon_chr1:147285323	1	1	0	NA	2	88.26	88.99	0.74	NA
1074	BCL9	67.2071	51.2479	-0.3699	0.833486	NC	No	No	1	BCL9_exon_chr1:147623841	1	1	0	NA	2	89.16	88.05	-1.11	NA
1075	ACP6	92.7875	91.7947	-0.0102	1	NC	No	No	1	ACP6_exon_chr1:147648411	1	1	0	NA	1
1076	GPR89B	133.139	119.872	-0.136	0.96851	NC	No	No	1	GPR89B_exon_chr1:147992710	1	1	0	NA	1
1077	LINC02804	20.7949	23.9622	0.2223	1	NC	No	No	1	LINC02804_exon_chr1:148025776	1	1	0	NA	1
1078	RNVU1-7	13.6681	10.7547	-0.3628	1	NC	No	No	1	RNVU1-7_exon_chr1:148038916	1	1	0	NA	2	66.16	60.38	-5.78	NA
1079	NBPF11	29.0159	29.9207	0.028	1	NC	No	No	1	NBPF11_exon_chr1:148103912	1	1	0	NA	2	39.03	43.01	3.98	NA
1080	AC245100.7	12.9844	8.0082	-0.7191	1	NC	No	No	1	AC245100.7_exon_chr1:148458813	1	1	0	NA	1
1081	PPIAL4G	12.7864	12.774	-0.0166	1	NC	No	No	1	PPIAL4G_exon_chr1:148483679	1	1	0	NA	1
1082	NBPF14	49.3218	49.2204	-0.0119	1	NC	No	No	1	NBPF14_exon_chr1:148533248	1	1	0	NA	2	33.59	36.59	3	NA
1083	NOTCH2NLB	312.561	369.174	0.2374	0.165461	NC	No	No	1	NOTCH2NLB_exon_chr1:148607159	1	1	0	NA	1
1084	NUDT4B	20.444	20.9452	0.0429	1	NC	No	No	1	NUDT4B_exon_chr1:148748893	1	1	0	NA	1
1085	PDE4DIP	29.8942	27.1036	-0.1731	1	NC	No	No	2	PDE4DIP_exon_chr1:148974513	0.069	0.0663	-0.0027	NA	1
1086	PDE4DIP									PDE4DIP_exon_chr1:148981269	0.9036	0.9085	0.0048	NA	4	57.18	58.42	1.24	NA
1087	NBPF9	77.485	81.7816	0.0619	1	NC	No	No	1	NBPF9_exon_chr1:149055899	1	1	0	NA	2	17.64	20.28	2.64	NA
1088	AC245297.3	61.5236	47.3998	-0.3856	0.845907	NC	No	No	1	AC245297.3_exon_chr1:149250564	1	1	0	NA	1
1089	NOTCH2NLC	330.793	382.488	0.207	0.227761	NC	No	No	1	NOTCH2NLC_exon_chr1:149464076	1	1	0	NA	1
1090	AC242842.3	72.8625	74.4304	0.0068	1	NC	No	No	1	AC242842.3_exon_chr1:149554494	1	1	0	NA	3	11.1	10.95	-0.15	NA
1091	LINC00869	45.825	43.4563	-0.0897	1	NC	No	No	2	LINC00869_exon_chr1:149646598	0.701	0.7414	0.0404	NA	1
1092	LINC00869									LINC00869_exon_chr1:149705177	0.299	0.2586	-0.0404	NA	1
1093	HIST2H4A	10.3232	5.7708	-0.782	1	NC	No	No	2	HIST2H4A_exon_chr1:149832658	0.1181	0.1459	0.0278	NA	3	27.63	23.66	-3.97	NA
1094	HIST2H4A									HIST2H4A_exon_chr1:149834134	0.8819	0.8541	-0.0278	NA	1
1095	HIST2H2AA3	36.3433	31.3855	-0.2123	1	NC	No	No	1	HIST2H2AA3_exon_chr1:149842736	1	1	0	NA	1
1096	HIST2H2BC	11.9415	5.0296	-1.2446	1	NC	No	No	1	HIST2H2BC_exon_chr1:149850937	1	1	0	NA	3	25.38	41.42	16.03	NA
1097	HIST2H2AA4	35.9643	31.5055	-0.1971	1	NC	No	No	1	HIST2H2AA4_exon_chr1:149851060	1	1	0	NA	2	98.05	89.33	-8.72	NA
1098	HIST2H4B	11.1605	6.61	-0.7135	1	NC	No	No	2	HIST2H4B_exon_chr1:149859681	0.8155	0.7719	-0.0436	NA	3	25.67	23.15	-2.53	NA
1099	HIST2H4B									HIST2H4B_exon_chr1:149861210	0.1845	0.2281	0.0436	NA	2	55.81	50.1	-5.72	NA
1100	HIST2H2AC	95.4327	81.2516	-0.2526	0.695517	NC	No	No	1	HIST2H2AC_exon_chr1:149886974	1	1	0	NA	1
1101	BOLA1	214.43	215.337	-0.0047	1	NC	No	No	1	BOLA1_exon_chr1:149899842	1	1	0	NA	1
1102	SF3B4	627.933	635.328	0.0204	0.83538	NC	No	No	1	SF3B4_exon_chr1:149923729	1	1	0	NA	1
1103	MTMR11	38.0435	25.0772	-0.577	1	NC	No	No	1	MTMR11_exon_chr1:149931592	1	1	0	NA	1
1104	OTUD7B	112.501	120.688	0.094	1	NC	No	No	1	OTUD7B_exon_chr1:149945065	1	1	0	NA	14	66.92	58.89	-8.03	NA
1105	AC244033.2	6.164	6.4595	0.0329	1	NC	No	No	2	AC244033.2_exon_chr1:150047945	0.1988	0.3492	0.1504	NA	1
1106	AC244033.2									AC244033.2_exon_chr1:150067701	0.8012	0.6508	-0.1504	NA	1
1107	VPS45	126.785	131.406	0.0539	1	NC	No	No	1	VPS45_exon_chr1:150144708	1	1	0	NA	1
1108	PLEKHO1	131.448	155.311	0.237	0.501249	NC	No	No	1	PLEKHO1_exon_chr1:150158818	1	1	0	NA	1
1109	ANP32E	790.697	920.408	0.2178	0.127173	NC	No	No	3	ANP32E_exon_chr1:150220761	0.3951	0.411	0.016	NA	7	75.38	69.79	-5.59	NA
1110	ANP32E									ANP32E_exon_chr1:150223294	0.0548	0.0568	0.0019	NA	1
1111	ANP32E									ANP32E_exon_chr1:150226795	0.5377	0.5228	-0.0149	NA	2	36.17	35.04	-1.13	NA
1112	APH1A	797.015	715.643	-0.1548	0.257279	NC	No	No	1	APH1A_exon_chr1:150266656	1	1	0	NA	1
1113	C1orf54	30.1852	38.968	0.3665	1	NC	No	No	1	C1orf54_exon_chr1:150280834	1	1	0	NA	1
1114	MRPS21	674.562	570.953	-0.246	0.0603081	NC	No	No	1	MRPS21_exon_chr1:150308047	1	1	0	NA	1
1115	PRPF3	71.5097	63.383	-0.1538	1	NC	No	No	1	PRPF3_exon_chr1:150352832	1	1	0	NA	3	23.76	20.22	-3.55	NA
1116	RPRD2	180.513	192.221	0.0821	0.980053	NC	No	No	1	RPRD2_exon_chr1:150470560	1	1	0	NA	6	28.51	25.38	-3.13	NA
1117	TARS2	181.436	174.999	-0.0521	1	NC	No	No	1	TARS2_exon_chr1:150506915	1	1	0	NA	2	87.33	83.49	-3.84	NA
1118	ADAMTSL4-AS1	341.699	400.638	0.2357	0.150341	NC	No	No	1	ADAMTSL4-AS1_exon_chr1:150577491	1	1	0	NA	5	82.96	81.13	-1.83	NA
1119	ENSA	1935.44	1801.92	-0.1024	0.276232	NC	No	No	1	ENSA_exon_chr1:150622859	1	1	0	NA	1
1120	GOLPH3L	57.8023	45.7463	-0.3457	1	NC	No	No	1	GOLPH3L_exon_chr1:150648748	1	1	0	NA	5	91.66	92.89	1.23	NA
1121	ARNT	70.4572	111.345	0.664	0.0205272	UP	No	No	1	ARNT_exon_chr1:150812110	1	1	0	NA	5	74.22	78.24	4.02	NA
1122	CYCSP51	15.242	19.6009	0.3573	1	NC	No	No	1	CYCSP51_exon_chr1:150903895	1	1	0	NA	1
1123	SETDB1	33.5523	37.8512	0.1845	1	NC	No	No	4	SETDB1_exon_chr1:150929966	0.0499	0.0614	0.0114	NA	2	100	60.49	-39.51	NA
1124	SETDB1									SETDB1_exon_chr1:150944917	0.0981	0.0805	-0.0176	NA	1
1125	SETDB1									SETDB1_exon_chr1:150962586	0.0734	0.1049	0.0315	NA	2	33.52	8.59	-24.93	NA
1126	SETDB1									SETDB1_exon_chr1:150964246	0.7786	0.7532	-0.0254	NA	1
1127	CERS2	978.787	917.319	-0.0918	0.464227	NC	No	No	1	CERS2_exon_chr1:150966629	1	1	0	NA	3	55.59	50.83	-4.77	NA
1128	PRUNE1	104.98	138.921	0.3934	0.213532	NC	No	No	1	PRUNE1_exon_chr1:151033805	1	1	0	NA	1
1129	CDC42SE1	182.542	236.704	0.3753	0.098573	NC	No	No	1	CDC42SE1_exon_chr1:151053327	1	1	0	NA	1
1130	GABPB2	53.4	47.8488	-0.1721	1	NC	No	No	1	GABPB2_exon_chr1:151117956	1	1	0	NA	5	48.62	45.41	-3.21	NA
1131	AL592424.1	75.9376	92.0398	0.2782	0.647084	NC	No	No	1	AL592424.1_exon_chr1:151133517	1	1	0	NA	1
1132	LYSMD1	14.2254	10.2704	-0.4432	1	NC	No	No	1	LYSMD1_exon_chr1:151161020	1	1	0	NA	1
1133	SCNM1	231.268	274.188	0.2487	0.267769	NC	No	No	1	SCNM1_exon_chr1:151168985	1	1	0	NA	1
1134	TMOD4	49.6811	49.7504	-0.0056	1	NC	No	No	2	TMOD4_exon_chr1:151170103	0.1755	0.105	-0.0705	NA	1
1135	TMOD4									TMOD4_exon_chr1:151177064	0.8245	0.895	0.0705	NA	4	51.4	56.18	4.78	NA
1136	PIP5K1A	337.695	461.163	0.4525	0.000775627	UP	No	No	1	PIP5K1A_exon_chr1:151247862	1	1	0	NA	1
1137	PSMD4	2516.52	2355.61	-0.0935	0.382577	NC	No	No	1	PSMD4_exon_chr1:151267172	1	1	0	NA	1
1138	ZNF687-AS1	9.8947	6.011	-0.7393	1	NC	No	No	1	ZNF687-AS1_exon_chr1:151280258	1	1	0	NA	1
1139	PI4KB	93.8724	104.568	0.1483	1	NC	No	No	1	PI4KB_exon_chr1:151293033	1	1	0	NA	2	11.58	16.82	5.24	NA
1140	ZNF687	212.998	200.608	-0.0886	0.975426	NC	No	No	1	ZNF687_exon_chr1:151290694	1	1	0	NA	1
1141	RFX5	110.712	100.219	-0.1547	1	NC	No	No	1	RFX5_exon_chr1:151343178	1	1	0	NA	4	92.84	94.7	1.86	NA
1142	PSMB4	643.607	733.665	0.184	0.215441	NC	No	No	1	PSMB4_exon_chr1:151399980	1	1	0	NA	1
1143	POGZ	286.487	266.623	-0.1105	0.793593	NC	No	No	1	POGZ_exon_chr1:151406464	1	1	0	NA	4	81.5	75.71	-5.78	NA
1144	CGN	13.593	17.6228	0.3887	1	NC	No	No	1	CGN_exon_chr1:151537204	1	1	0	NA	2	88.28	92.09	3.81	NA
1145	TUFT1	43.6417	43.066	-0.0149	1	NC	No	No	1	TUFT1_exon_chr1:151581643	1	1	0	NA	1
1146	SNX27	82.5243	79.311	-0.0446	1	NC	No	No	1	SNX27_exon_chr1:151692910	1	1	0	NA	1
1147	MRPL9	449.27	479.833	0.0907	0.594203	NC	No	No	1	MRPL9_exon_chr1:151760181	1	1	0	NA	1
1148	TDRKH	33.3014	34.0366	0.0562	1	NC	No	No	1	TDRKH_exon_chr1:151774504	1	1	0	NA	1
1149	THEM4	282.13	284.394	0.0121	1	NC	No	No	1	THEM4_exon_chr1:151874928	1	1	0	NA	6	9.74	9.65	-0.09	NA
1150	S100A10	1546.82	1421.92	-0.121	0.289566	NC	No	No	1	S100A10_exon_chr1:151983324	1	1	0	NA	1
1151	S100A11	2099.65	2065.68	-0.0249	0.790344	NC	No	No	1	S100A11_exon_chr1:152032823	1	1	0	NA	1
1152	S100A6	11996.7	8601.49	-0.4801	1.92514e-10	DOWN	No	No	1	S100A6_exon_chr1:153534830	1	1	0	NA	1
1153	S100A4	430.997	240.15	-0.8451	0.0965316	NC	No	No	1	S100A4_exon_chr1:153543939	1	1	0	NA	1
1154	S100A3	60.7895	45.4499	-0.4045	0.831556	NC	No	No	1	S100A3_exon_chr1:153547846	1	1	0	NA	1
1155	S100A2	53.3631	32.0227	-0.7626	0.183521	NC	No	No	1	S100A2_exon_chr1:153561591	1	1	0	NA	2	22.69	14.81	-7.88	NA
1156	S100A16	306.309	252.27	-0.2778	0.167926	NC	No	No	1	S100A16_exon_chr1:153607718	1	1	0	NA	1
1157	S100A14	1501.7	1161.41	-0.371	0.0893048	NC	No	No	1	S100A14_exon_chr1:153615022	1	1	0	NA	1
1158	S100A13	1332.6	1197.62	-0.1568	0.307089	NC	No	No	1	S100A13_exon_chr1:153619038	1	1	0	NA	2	91.46	92	0.54	NA
1159	CHTOP	199.483	201.168	0.0088	1	NC	No	No	1	CHTOP_exon_chr1:153645063	1	1	0	NA	9	43.6	37.4	-6.21	NA
1160	SNAPIN	463.264	473.705	0.0265	0.819803	NC	No	No	1	SNAPIN_exon_chr1:153661199	1	1	0	NA	2	95.72	93.45	-2.27	NA
1161	ILF2	467.878	463.88	-0.0069	0.906888	NC	No	No	1	ILF2_exon_chr1:153662556	1	1	0	NA	8	15.96	15.25	-0.71	NA
1162	INTS3	104.822	122.637	0.222	0.654301	NC	No	No	2	INTS3_exon_chr1:153773192	0.5098	0.5009	-0.0089	NA	1
1163	INTS3									INTS3_exon_chr1:GL383518v1	0.4902	0.4965	0.0063	NA	1
1164	SLC27A3	54.0408	58.9741	0.1109	1	NC	No	No	2	SLC27A3_exon_chr1:153777061	0.5232	0.5045	-0.0187	NA	1
1165	SLC27A3									SLC27A3_exon_chr1:GL383518v1	0.4768	0.4955	0.0187	NA	1
1166	GATAD2B	406.806	447.869	0.1402	0.419079	NC	No	No	2	GATAD2B_exon_chr1:153810310	0.5332	0.5326	-0.0005	NA	4	42.33	41.06	-1.28	NA
1167	GATAD2B									GATAD2B_exon_chr1:GL383518v1	0.4668	0.4674	0.0005	NA	4	44.46	43.89	-0.57	NA
1168	DENND4B	132.767	159.389	0.263	0.406454	NC	No	No	2	DENND4B_exon_chr1:153930442	0.8506	0.9013	0.0507	NA	1
1169	DENND4B									DENND4B_exon_chr1:153933319	0.1494	0.0987	-0.0507	NA	1
1170	CRTC2	194.393	213.821	0.1385	0.744364	NC	No	No	1	CRTC2_exon_chr1:153948329	1	1	0	NA	1
1171	AL358472.7	1060.53	1072.62	0.0191	0.809584	NC	No	No	2	AL358472.7_exon_chr1:153960754	0.5511	0.5402	-0.0109	NA	1
1172	AL358472.7									AL358472.7_exon_chr1:153974835	0.4489	0.4598	0.0109	NA	3	25.04	24.98	-0.06	NA
1173	CREB3L4	115.827	111.113	-0.0575	1	NC	No	No	1	CREB3L4_exon_chr1:153973871	1	1	0	NA	1
1174	AL358472.6	4151.5	4166.1	0.0044	0.895511	NC	No	No	1	AL358472.6_exon_chr1:153983581	1	1	0	NA	2	34.17	34.42	0.26	NA
1175	RPS27	30875.3	30551.3	-0.0152	0.726002	NC	No	No	1	RPS27_exon_chr1:153992064	1	1	0	NA	1
1176	NUP210L	3860.94	3772.02	-0.0334	0.681019	NC	No	No	1	NUP210L_exon_chr1:154159048	1	1	0	NA	1
1177	TPM3	552.313	482.926	-0.1863	0.288602	NC	No	No	2	TPM3_exon_chr1:154172978	0.1393	0.1414	0.0021	NA	2	87.11	88.53	1.42	NA
1178	TPM3									TPM3_exon_chr1:154173201	0.8607	0.8586	-0.0021	NA	1
1179	C1orf43	825.89	758.757	-0.1224	0.382764	NC	No	No	2	C1orf43_exon_chr1:154207648	0.9048	0.9205	0.0157	NA	1
1180	C1orf43									C1orf43_exon_chr1:154212378	0.0952	0.0795	-0.0157	NA	4	64.39	62.63	-1.76	NA
1181	UBAP2L	460.979	478.17	0.0532	0.737118	NC	No	No	2	UBAP2L_exon_chr1:154263102	0.684	0.7378	0.0538	NA	1
1182	UBAP2L									UBAP2L_exon_chr1:154270199	0.316	0.2622	-0.0538	NA	7	50.7	51.05	0.35	NA
1183	HAX1	485.356	593.091	0.2895	0.0282742	NC	No	No	1	HAX1_exon_chr1:154274949	1	1	0	NA	1
1184	ATP8B2	68.6496	78.9864	0.1907	0.932551	NC	No	No	1	ATP8B2_exon_chr1:154348839	1	1	0	NA	1
1185	IL6R	50.5415	45.2755	-0.1441	1	NC	No	No	1	IL6R_exon_chr1:154465133	1	1	0	NA	1
1186	UBE2Q1	425.908	477.312	0.1659	0.33223	NC	No	No	2	UBE2Q1_exon_chr1:154550469	0.8873	0.8823	-0.005	NA	2	9.28	8.87	-0.42	NA
1187	UBE2Q1									UBE2Q1_exon_chr1:154553172	0.1127	0.1177	0.005	NA	1
1188	ADAR	442.655	472.41	0.0917	0.568336	NC	No	No	1	ADAR_exon_chr1:154585043	1	1	0	NA	1
1189	PMVK	180.568	145.647	-0.3111	0.368232	NC	No	No	1	PMVK_exon_chr1:154925265	1	1	0	NA	1
1190	PBXIP1	146.815	146.235	-0.0058	1	NC	No	No	1	PBXIP1_exon_chr1:154945117	1	1	0	NA	1
1191	PYGO2	515.528	445.046	-0.2116	0.164668	NC	No	No	2	PYGO2_exon_chr1:154959846	0.4112	0.338	-0.0732	NA	1
1192	PYGO2									PYGO2_exon_chr1:154964368	0.5888	0.662	0.0732	NA	1
1193	CKS1B	1061.58	1015.77	-0.0633	0.620891	NC	No	No	1	CKS1B_exon_chr1:154977298	1	1	0	NA	1
1194	FLAD1	267.777	232.477	-0.1893	0.570962	NC	No	No	2	FLAD1_exon_chr1:154987465	0.1914	0.2197	0.0283	NA	1
1195	FLAD1									FLAD1_exon_chr1:154992564	0.8086	0.7803	-0.0283	NA	1
1196	ZBTB7B	153.03	173.179	0.1817	0.649001	NC	No	No	1	ZBTB7B_exon_chr1:155016219	1	1	0	NA	3	85.73	83.85	-1.88	NA
1197	DCST1-AS1	9.1547	6.0619	-0.5257	1	NC	No	No	1	DCST1-AS1_exon_chr1:155045853	1	1	0	NA	1
1198	ADAM15	1367.91	1360.49	-0.0069	0.888387	NC	No	No	1	ADAM15_exon_chr1:155062459	1	1	0	NA	1
1199	EFNA4	51.9915	46.2297	-0.1579	1	NC	No	No	1	EFNA4_exon_chr1:155068852	1	1	0	NA	1
1200	AL691442.1	84.2857	76.2354	-0.1477	1	NC	No	No	1	AL691442.1_exon_chr1:155086412	1	1	0	NA	1
1201	EFNA1	34.2906	40.7678	0.2153	1	NC	No	No	1	EFNA1_exon_chr1:155133954	1	1	0	NA	1
1202	SLC50A1	287.08	243.008	-0.2424	0.260968	NC	No	No	1	SLC50A1_exon_chr1:155138161	1	1	0	NA	1
1203	DPM3	60.3687	49.5596	-0.2974	1	NC	No	No	1	DPM3_exon_chr1:155140407	1	1	0	NA	1
1204	KRTCAP2	2923.58	2690.97	-0.1189	0.254347	NC	No	No	1	KRTCAP2_exon_chr1:155169619	1	1	0	NA	1
1205	TRIM46	16.0289	8.469	-0.8477	1	NC	No	No	2	TRIM46_exon_chr1:155180434	0.3307	0.2129	-0.1178	NA	1
1206	TRIM46									TRIM46_exon_chr1:155183796	0.6693	0.7871	0.1178	NA	1
1207	MUC1	10.2959	21.6917	1.0488	1	NC	No	No	1	MUC1_exon_chr1:155186209	1	1	0	NA	1
1208	THBS3	32.3497	25.8532	-0.3358	1	NC	No	No	1	THBS3_exon_chr1:155195899	1	1	0	NA	1
1209	MTX1	607.424	606.142	-0.0051	0.884405	NC	No	No	1	MTX1_exon_chr1:155213483	1	1	0	NA	1
1210	AC234582.2	318.894	318.905	0.0036	0.905111	NC	No	No	1	AC234582.2_exon_chr1:155214473	1	1	0	NA	1
1211	MTX1P1	1213.63	1218.39	0.0041	0.866266	NC	No	No	2	MTX1P1_exon_chr1:155234110	0.4988	0.5011	0.0023	NA	1
1212	MTX1P1									MTX1P1_exon_chr1:GL383519v1	0.5012	0.4989	-0.0023	NA	1
1213	GBA	644.486	639.019	-0.0102	0.871805	NC	No	No	2	GBA_exon_chr1:155235100	0.5031	0.5026	-0.0005	NA	1
1214	GBA									GBA_exon_chr1:GL383519v1	0.4969	0.4974	0.0005	NA	1
1215	FAM189B	205.271	279.329	0.4414	0.0187879	UP	No	No	2	FAM189B_exon_chr1:155248303	0.494	0.4899	-0.0041	NA	1
1216	FAM189B									FAM189B_exon_chr1:GL383519v1	0.506	0.5101	0.0041	NA	1
1217	SCAMP3	821.828	840.357	0.0346	0.780634	NC	No	No	2	SCAMP3_exon_chr1:155256419	0.4922	0.4912	-0.001	NA	1
1218	SCAMP3									SCAMP3_exon_chr1:GL383519v1	0.5078	0.5088	0.001	NA	1
1219	CLK2	490.395	470.605	-0.0514	0.750673	NC	No	No	2	CLK2_exon_chr1:155263400	0.4933	0.4943	0.001	NA	1
1220	CLK2									CLK2_exon_chr1:GL383519v1	0.5067	0.5057	-0.001	NA	1
1221	HCN3	87.2901	63.4893	-0.4738	0.296631	NC	No	No	2	HCN3_exon_chr1:155287780	0.5	0.4921	-0.0079	NA	3	93.72	88.25	-5.47	NA
1222	HCN3									HCN3_exon_chr1:GL383519v1	0.5	0.5079	0.0079	NA	3	93.72	87.72	-6	NA
1223	FDPS	2014.99	1886.31	-0.0929	0.369634	NC	No	No	1	FDPS_exon_chr1:155320408	1	1	0	NA	1
1224	RUSC1	90.3183	106.116	0.2295	0.76399	NC	No	No	1	RUSC1_exon_chr1:155330402	1	1	0	NA	3	89.94	86.2	-3.74	NA
1225	ASH1L	99.8139	102.575	0.0212	1	NC	No	No	3	ASH1L_exon_chr1:155337751	0.7111	0.7305	0.0194	NA	6	75.82	77	1.19	NA
1226	ASH1L									ASH1L_exon_chr1:155357749	0.087	0.1051	0.0181	NA	1
1227	ASH1L									ASH1L_exon_chr1:155482449	0.2018	0.1644	-0.0374	NA	1
1228	ASH1L-AS1	6.1145	8.3655	0.4664	1	NC	No	No	1	ASH1L-AS1_exon_chr1:155562980	1	1	0	NA	1
1229	MSTO1	626.865	672.934	0.1051	0.460058	NC	No	No	1	MSTO1_exon_chr1:155613656	1	1	0	NA	4	64.34	60.81	-3.53	NA
1230	AL353807.3	75.9384	76.6614	-0.0066	1	NC	No	No	1	AL353807.3_exon_chr1:155661423	1	1	0	NA	1
1231	DAP3	296.239	312.435	0.0783	0.868284	NC	No	No	1	DAP3_exon_chr1:155738156	1	1	0	NA	4	25.71	22.99	-2.71	NA
1232	GON4L	346.696	346.431	0.0007	0.900795	NC	No	No	3	GON4L_exon_chr1:155750733	0.3031	0.2907	-0.0124	NA	1
1233	GON4L									GON4L_exon_chr1:155766709	0.2819	0.32	0.0381	NA	1
1234	GON4L									GON4L_exon_chr1:155822476	0.408	0.3754	-0.0326	NA	1
1235	MSTO2P	239.442	282.69	0.2354	0.310541	NC	No	No	1	MSTO2P_exon_chr1:155749922	1	1	0	NA	2	15.66	16.36	0.7	NA
1236	RIT1	36.1657	45.763	0.3581	1	NC	No	No	1	RIT1_exon_chr1:155900618	1	1	0	NA	1
1237	KHDC4	73.1295	72.2827	-0.0157	1	NC	No	No	2	KHDC4_exon_chr1:155915964	0.8577	0.8554	-0.0023	NA	1
1238	KHDC4									KHDC4_exon_chr1:155921628	0.1138	0.0921	-0.0217	NA	1
1239	ARHGEF2	59.0458	53.3296	-0.149	1	NC	No	No	1	ARHGEF2_exon_chr1:155948015	1	1	0	NA	1
1240	SSR2	987.505	1013.15	0.0379	0.748113	NC	No	No	1	SSR2_exon_chr1:156009650	1	1	0	NA	1
1241	UBQLN4	131.032	109.707	-0.2676	0.556672	NC	No	No	1	UBQLN4_exon_chr1:156037130	1	1	0	NA	1
1242	LAMTOR2	1215.13	1257.95	0.0507	0.670748	NC	No	No	1	LAMTOR2_exon_chr1:156058277	1	1	0	NA	1
1243	RAB25	283.668	258.794	-0.1378	0.729591	NC	No	No	1	RAB25_exon_chr1:156069670	1	1	0	NA	1
1244	MEX3A	81.3659	54.8871	-0.5728	0.367956	NC	No	No	1	MEX3A_exon_chr1:156077682	1	1	0	NA	4	88.87	87.39	-1.47	NA
1245	LMNA	1546.25	1305.56	-0.2447	0.331929	NC	No	No	2	LMNA_exon_chr1:156136213	0.4208	0.4216	0.0009	NA	1
1246	LMNA									LMNA_exon_chr1:156139079	0.5763	0.577	0.0006	NA	3	67.76	65.67	-2.09	NA
1247	PMF1-BGLAP	70.2319	85.1499	0.2794	0.717396	NC	No	No	1	PMF1-BGLAP_exon_chr1:156210239	1	1	0	NA	1
1248	PMF1	39.2955	48.3452	0.2745	1	NC	No	No	1	PMF1_exon_chr1:156239547	1	1	0	NA	1
1249	BGLAP	13.1381	10.5202	-0.3325	1	NC	No	No	1	BGLAP_exon_chr1:156242761	1	1	0	NA	1
1250	PAQR6	155.643	144.113	-0.111	0.986839	NC	No	No	1	PAQR6_exon_chr1:156244403	1	1	0	NA	1
1251	SMG5	395.627	428.051	0.1149	0.538794	NC	No	No	1	SMG5_exon_chr1:156250670	1	1	0	NA	1
1252	GLMP	131.968	110.556	-0.2442	0.640678	NC	No	No	2	GLMP_exon_chr1:156291106	0.0556	0.0671	0.0114	NA	1
1253	GLMP									GLMP_exon_chr1:156294236	0.9444	0.9329	-0.0114	NA	1
1254	CCT3	1089.07	1048.96	-0.055	0.654292	NC	No	No	2	CCT3_exon_chr1:156309303	0.7739	0.7855	0.0116	NA	1
1255	CCT3									CCT3_exon_chr1:156321025	0.22	0.2088	-0.0112	NA	1
1256	TSACC	16.1322	7.0778	-1.118	1	NC	No	No	1	TSACC_exon_chr1:156346767	1	1	0	NA	1
1257	RHBG	31.0166	35.4056	0.1816	1	NC	No	No	1	RHBG_exon_chr1:156384413	1	1	0	NA	1
1258	C1orf61	39.7147	31.8874	-0.3284	1	NC	No	No	1	C1orf61_exon_chr1:156409030	1	1	0	NA	2	87.98	87.68	-0.31	NA
1259	MEF2D	57.4199	71.1167	0.3121	1	NC	No	No	1	MEF2D_exon_chr1:156467656	1	1	0	NA	4	55.15	47.83	-7.32	NA
1260	IQGAP3	60.735	74.4516	0.2827	1	NC	No	No	1	IQGAP3_exon_chr1:156526599	1	1	0	NA	1
1261	NAXE	794.566	745.581	-0.0891	0.579187	NC	No	No	1	NAXE_exon_chr1:156592556	1	1	0	NA	5	79.77	80.32	0.56	NA
1262	GPATCH4	1504.99	1374.55	-0.1283	0.25172	NC	No	No	1	GPATCH4_exon_chr1:156598319	1	1	0	NA	12	30.87	32.68	1.81	NA
1263	AL365181.2	22.2962	19.7386	-0.1889	1	NC	No	No	1	AL365181.2_exon_chr1:156641004	1	1	0	NA	1
1264	AL365181.3	372.135	288.272	-0.3635	0.0200891	NC	No	No	1	AL365181.3_exon_chr1:156644887	1	1	0	NA	1
1265	NES	116.283	59.1258	-0.9984	0.000869856	DOWN	No	No	1	NES_exon_chr1:156673205	1	1	0	NA	6	23.44	27.88	4.44	NA
1266	CRABP2	1304.93	1353.5	0.0519	0.82855	NC	No	No	1	CRABP2_exon_chr1:156700076	1	1	0	NA	1
1267	ISG20L2	127.175	108.387	-0.2206	0.606163	NC	No	No	1	ISG20L2_exon_chr1:156723462	1	1	0	NA	6	80.77	77.59	-3.19	NA
1268	RRNAD1	17.4773	16.4979	-0.1165	1	NC	No	No	1	RRNAD1_exon_chr1:156736631	1	1	0	NA	1
1269	MRPL24	247.66	228.276	-0.1227	0.773857	NC	No	No	1	MRPL24_exon_chr1:156737534	1	1	0	NA	1
1270	HDGF	1362.07	1262.88	-0.1081	0.370426	NC	No	No	1	HDGF_exon_chr1:156743878	1	1	0	NA	2	87.87	86.66	-1.21	NA
1271	PRCC	145.906	138.395	-0.0885	1	NC	No	No	1	PRCC_exon_chr1:156800373	1	1	0	NA	1
1272	SH2D2A	13.2891	11.6617	-0.1522	1	NC	No	No	1	SH2D2A_exon_chr1:156806573	1	1	0	NA	1
1273	NTRK1	10.7576	12.2881	0.1886	1	NC	No	No	1	NTRK1_exon_chr1:156881456	1	1	0	NA	1
1274	PEAR1	40.9104	39.2675	-0.0696	1	NC	No	No	1	PEAR1_exon_chr1:156914646	1	1	0	NA	1
1275	ARHGEF11	31.1395	38.8411	0.3182	1	NC	No	No	2	ARHGEF11_exon_chr1:156936244	0.5292	0.6144	0.0851	NA	1
1276	ARHGEF11									ARHGEF11_exon_chr1:157045370	0.4576	0.3382	-0.1194	NA	1
1277	ETV3	59.5171	76.8216	0.3758	0.87374	NC	No	No	1	ETV3_exon_chr1:157125979	1	1	0	NA	2	91.16	95.5	4.34	NA
1278	KIRREL1-IT1	12.1488	19.5676	0.675	1	NC	No	No	2	KIRREL1-IT1_exon_chr1:158025549	0.8992	0.94	0.0407	NA	1
1279	KIRREL1-IT1									KIRREL1-IT1_exon_chr1:158030716	0.1008	0.06	-0.0407	NA	1
1280	KIRREL1	21.2242	27.5274	0.3946	1	NC	No	No	1	KIRREL1_exon_chr1:158094643	1	1	0	NA	4	44.31	37.32	-7	NA
1281	DUSP23	512.159	469.308	-0.1271	0.45028	NC	No	No	1	DUSP23_exon_chr1:159782152	1	1	0	NA	1
1282	TAGLN2	2939.74	2730.03	-0.1071	0.287224	NC	No	No	1	TAGLN2_exon_chr1:159919376	1	1	0	NA	1
1283	IGSF9	11.2851	7.6962	-0.5322	1	NC	No	No	1	IGSF9_exon_chr1:159927526	1	1	0	NA	1
1284	PIGM	38.0981	34.6551	-0.1387	1	NC	No	No	1	PIGM_exon_chr1:160031990	1	1	0	NA	8	22.01	17.05	-4.96	NA
1285	IGSF8	59.1507	62.4265	0.0601	1	NC	No	No	1	IGSF8_exon_chr1:160091631	1	1	0	NA	1
1286	PEA15	225.881	237.318	0.0776	0.995557	NC	No	No	1	PEA15_exon_chr1:160213421	1	1	0	NA	3	76.45	83.33	6.88	NA
1287	AL139011.2	288.465	267.818	-0.1061	0.816937	NC	No	No	3	AL139011.2_exon_chr1:160218440	0.7031	0.6471	-0.056	NA	4	54.88	49.11	-5.77	NA
1288	AL139011.2									AL139011.2_exon_chr1:160240370	0.0913	0.0768	-0.0145	NA	2	42.66	31.5	-11.16	NA
1289	AL139011.2									AL139011.2_exon_chr1:160280246	0.2056	0.2761	0.0705	NA	5	26.26	34.62	8.36	NA
1290	DCAF8	26.0944	26.4368	0.0387	1	NC	No	No	1	DCAF8_exon_chr1:160231407	1	1	0	NA	1
1291	COPA	275.72	300.325	0.1206	0.745361	NC	No	No	1	COPA_exon_chr1:160290216	1	1	0	NA	5	88.31	91.59	3.28	NA
1292	NCSTN	138.776	159.231	0.2093	0.616594	NC	No	No	1	NCSTN_exon_chr1:160358148	1	1	0	NA	1
1293	AL354714.2	48.6364	30.8069	-0.6723	0.382796	NC	No	No	1	AL354714.2_exon_chr1:160894979	1	1	0	NA	1
1294	AL591806.4	270.861	245.846	-0.1415	0.629416	NC	No	No	1	AL591806.4_exon_chr1:160998906	1	1	0	NA	9	62.47	61.36	-1.11	NA
1295	TSTD1	1471.78	1159.78	-0.3425	0.000101523	NC	No	No	1	TSTD1_exon_chr1:161038729	1	1	0	NA	1
1296	PFDN2	1156.64	1230.45	0.0921	0.448934	NC	No	No	1	PFDN2_exon_chr1:161100859	1	1	0	NA	2	90.55	91.81	1.27	NA
1297	DEDD	210.192	231.112	0.1354	0.714923	NC	No	No	1	DEDD_exon_chr1:161122523	1	1	0	NA	6	50.15	49.3	-0.85	NA
1298	NIT1	206.299	212.604	0.0336	1	NC	No	No	1	NIT1_exon_chr1:161120498	1	1	0	NA	1
1299	UFC1	290.569	280.768	-0.0514	1	NC	No	No	1	UFC1_exon_chr1:161156949	1	1	0	NA	1
1300	USP21	27.3917	31.7	0.1825	1	NC	No	No	1	USP21_exon_chr1:161165356	1	1	0	NA	1
1301	PPOX	111.176	114.102	0.0462	1	NC	No	No	1	PPOX_exon_chr1:161170906	1	1	0	NA	1
1302	B4GALT3	166.75	204.519	0.2887	0.294941	NC	No	No	1	B4GALT3_exon_chr1:161172089	1	1	0	NA	1
1303	NDUFS2	309.462	299.889	-0.0429	1	NC	No	No	1	NDUFS2_exon_chr1:161213249	1	1	0	NA	1
1304	TOMM40L	96.1487	134.219	0.4801	0.0838708	NC	No	No	1	TOMM40L_exon_chr1:161228185	1	1	0	NA	2	27.43	18.76	-8.67	NA
1305	MPZ	26.8864	19.6987	-0.4177	1	NC	No	No	1	MPZ_exon_chr1:161306190	1	1	0	NA	1
1306	SDHC	339.651	353.747	0.0606	0.745242	NC	No	No	1	SDHC_exon_chr1:161362328	1	1	0	NA	12	16.23	16.05	-0.18	NA
1307	AL592295.1	55.5406	58.8916	0.0847	1	NC	No	No	1	AL592295.1_exon_chr1:161406472	1	1	0	NA	1
1308	DUSP12	118.233	120.868	0.0303	1	NC	No	No	1	DUSP12_exon_chr1:161756785	1	1	0	NA	1
1309	ATF6	49.4071	50.2791	0.0302	1	NC	No	No	1	ATF6_exon_chr1:161958445	1	1	0	NA	6	44.24	42.33	-1.91	NA
1310	OLFML2B	16.6358	20.2316	0.3104	1	NC	No	No	1	OLFML2B_exon_chr1:161984276	1	1	0	NA	1
1311	NOS1AP	37.0594	28.5485	-0.3633	1	NC	No	No	1	NOS1AP_exon_chr1:162287343	1	1	0	NA	1
1312	AL512785.2	53.8777	71.6058	0.406	0.878136	NC	No	No	1	AL512785.2_exon_chr1:162383181	1	1	0	NA	1
1313	UHMK1	736.246	842.606	0.1952	0.132562	NC	No	No	1	UHMK1_exon_chr1:162522403	1	1	0	NA	1
1314	UAP1	137.491	143.237	0.0535	1	NC	No	No	1	UAP1_exon_chr1:162599270	1	1	0	NA	1
1315	HSD17B7	169.115	176.401	0.0696	1	NC	No	No	1	HSD17B7_exon_chr1:162812297	1	1	0	NA	1
1316	RGS5	14.1785	19.9485	0.5127	1	NC	No	No	1	RGS5_exon_chr1:163147503	1	1	0	NA	3	8.66	9.44	0.78	NA
1317	NUF2	73.1773	74.7381	0.0309	1	NC	No	No	2	NUF2_exon_chr1:163343732	0.1288	0.0746	-0.0543	NA	1
1318	NUF2									NUF2_exon_chr1:163355334	0.8712	0.9254	0.0543	NA	2	89.07	96.32	7.25	NA
1319	PBX1	12.4552	9.9058	-0.3557	1	NC	No	No	1	PBX1_exon_chr1:164846583	1	1	0	NA	3	66.17	68.05	1.89	NA
1320	MGST3	166.94	173.397	0.0468	1	NC	No	No	1	MGST3_exon_chr1:165655367	1	1	0	NA	4	89.6	90.8	1.2	NA
1321	ALDH9A1	227.593	272.72	0.26	0.227123	NC	No	No	1	ALDH9A1_exon_chr1:165663144	1	1	0	NA	1
1322	TMCO1	532.816	555.073	0.0659	0.715562	NC	No	No	2	TMCO1_exon_chr1:165728121	0.8236	0.8321	0.0086	NA	8	72.45	65.64	-6.81	NA
1323	TMCO1									TMCO1_exon_chr1:165759584	0.1423	0.1524	0.0101	NA	1
1324	MIR3658	476.565	507.936	0.0902	0.565812	NC	No	No	1	MIR3658_exon_chr1:165907683	1	1	0	NA	4	29.5	26.32	-3.18	NA
1325	POGK	316.389	309.076	-0.0387	0.796208	NC	No	No	1	POGK_exon_chr1:166848937	1	1	0	NA	1
1326	TADA1	67.8618	54.0831	-0.3057	1	NC	No	No	1	TADA1_exon_chr1:166857719	1	1	0	NA	1
1327	ILDR2	5.401	7.5195	0.4868	1	NC	No	No	1	ILDR2_exon_chr1:166919390	1	1	0	NA	3	20.57	48.72	28.16	NA
1328	POU2F1	27.1416	23.5688	-0.2295	1	NC	No	No	1	POU2F1_exon_chr1:167415499	1	1	0	NA	2	46.08	36.09	-9.99	NA
1329	CREG1	335.798	349.508	0.0497	0.78996	NC	No	No	1	CREG1_exon_chr1:167542301	1	1	0	NA	1
1330	MPZL1	453.602	485.523	0.0998	0.531711	NC	No	No	1	MPZL1_exon_chr1:167787819	1	1	0	NA	10	74.74	72.24	-2.5	NA
1331	MPC2	191.565	231.172	0.2647	0.291756	NC	No	No	1	MPC2_exon_chr1:167918359	1	1	0	NA	5	10.88	12.67	1.79	NA
1332	GCSHP5	380.704	397.875	0.066	0.734026	NC	No	No	1	GCSHP5_exon_chr1:168056422	1	1	0	NA	1
1333	DCAF6	147.167	150.379	0.0381	1	NC	No	No	1	DCAF6_exon_chr1:168075370	1	1	0	NA	3	77.51	73.7	-3.81	NA
1334	GPR161	261.74	236.454	-0.1465	0.672346	NC	No	No	1	GPR161_exon_chr1:168085796	1	1	0	NA	4	44.47	44.92	0.46	NA
1335	TIPRL	249.097	264.96	0.0993	0.889481	NC	No	No	1	TIPRL_exon_chr1:168199902	1	1	0	NA	3	52.82	54.31	1.5	NA
1336	SFT2D2	47.3262	64.7483	0.4667	0.63446	NC	No	No	1	SFT2D2_exon_chr1:168242500	1	1	0	NA	5	84.94	86.79	1.86	NA
1337	ATP1B1	289.522	323.19	0.1577	0.595803	NC	No	No	1	ATP1B1_exon_chr1:169131291	1	1	0	NA	3	92.85	92.54	-0.31	NA
1338	NME7	117.166	129.128	0.1387	0.821222	NC	No	No	1	NME7_exon_chr1:169132817	1	1	0	NA	1
1339	BLZF1	41.7955	46.1884	0.1439	1	NC	No	No	2	BLZF1_exon_chr1:169386996	0.9295	0.8854	-0.0441	NA	7	86.28	92.12	5.84	NA
1340	BLZF1									BLZF1_exon_chr1:169395893	0.0498	0.1074	0.0576	NA	3	67.05	57.61	-9.44	NA
1341	SLC19A2	29.2593	44.9555	0.6332	1	NC	No	No	1	SLC19A2_exon_chr1:169465977	1	1	0	NA	1
1342	METTL18	44.6268	49.1309	0.1268	1	NC	No	No	1	METTL18_exon_chr1:169793897	1	1	0	NA	3	86.94	89.52	2.58	NA
1343	SCYL3	15.3171	16.2054	0.1129	1	NC	No	No	1	SCYL3_exon_chr1:169853772	1	1	0	NA	3	34.78	24.52	-10.25	NA
1344	C1orf112	74.3766	84.0098	0.1644	1	NC	No	No	1	C1orf112_exon_chr1:169852789	1	1	0	NA	2	16.3	14.5	-1.81	NA
1345	KIFAP3	58.1967	47.5248	-0.3058	1	NC	No	No	1	KIFAP3_exon_chr1:169921781	1	1	0	NA	1
1346	GORAB	18.1312	18.5392	0.0011	1	NC	No	No	1	GORAB_exon_chr1:170552014	1	1	0	NA	1
1347	FMO4	9.8922	7.699	-0.3714	1	NC	No	No	2	FMO4_exon_chr1:171332708	0.9174	0.8514	-0.066	NA	1
1348	FMO4									FMO4_exon_chr1:171341412	0.0826	0.1486	0.066	NA	1
1349	PRRC2C	9175.56	9088.43	-0.0135	0.834489	NC	No	No	2	PRRC2C_exon_chr1:171532342	0.8968	0.8805	-0.0162	NA	3	96.03	96.19	0.16	NA
1350	PRRC2C									PRRC2C_exon_chr1:171591586	0.0682	0.0838	0.0156	NA	1
1351	VAMP4	16.4797	20.4922	0.313	1	NC	No	No	1	VAMP4_exon_chr1:171704534	1	1	0	NA	6	38.17	36.28	-1.89	NA
1352	EEF1AKNMT	108.418	80.4567	-0.4268	0.217409	NC	No	No	1	EEF1AKNMT_exon_chr1:171796481	1	1	0	NA	3	52.49	44	-8.48	NA
1353	PIGC	49.6316	47.4786	-0.0843	1	NC	No	No	1	PIGC_exon_chr1:172444086	1	1	0	NA	2	91.37	95.96	4.59	NA
1354	DNM3	8.244	11.6713	0.5363	1	NC	No	No	3	DNM3_exon_chr1:172132888	0	0.0856	0.0856	NA	1
1355	DNM3									DNM3_exon_chr1:172407771	0.7008	0.482	-0.2187	NA	1
1356	DNM3									DNM3_exon_chr1:172418280	0.2992	0.4323	0.1331	NA	1
1357	SUCO	103.1	117.965	0.2014	0.674004	NC	No	No	1	SUCO_exon_chr1:172609815	1	1	0	NA	1
1358	PRDX6	2399.27	2475.42	0.0449	0.630976	NC	No	No	1	PRDX6_exon_chr1:173487734	1	1	0	NA	5	36.34	34.37	-1.97	NA
1359	KLHL20	25.6864	25.7054	-0.0195	1	NC	No	No	1	KLHL20_exon_chr1:173785162	1	1	0	NA	6	73.33	72.05	-1.28	NA
1360	CENPL	30.7886	37.5646	0.3005	1	NC	No	No	2	CENPL_exon_chr1:173800519	0.8918	0.7371	-0.1547	NA	3	97.49	88.19	-9.3	NA
1361	CENPL									CENPL_exon_chr1:173824473	0.1082	0.2629	0.1547	NA	2	28.81	25.17	-3.64	NA
1362	DARS2	257.933	266.297	0.0512	1	NC	No	No	1	DARS2_exon_chr1:173856665	1	1	0	NA	7	67.23	68.14	0.91	NA
1363	GAS5	1141.08	1018.46	-0.1655	0.224479	NC	No	No	1	GAS5_exon_chr1:173867815	1	1	0	NA	1
1364	ZBTB37	12.7327	11.8837	-0.0806	1	NC	No	No	1	ZBTB37_exon_chr1:173885635	1	1	0	NA	5	92.15	80.06	-12.09	NA
1365	RC3H1	79.2876	70.3488	-0.1631	1	NC	No	No	1	RC3H1_exon_chr1:173938874	1	1	0	NA	9	81.54	85.49	3.95	NA
1366	RABGAP1L	94.4519	103.985	0.1387	1	NC	No	No	2	RABGAP1L_exon_chr1:174957890	0.6932	0.8489	0.1558	NA	1
1367	RABGAP1L									RABGAP1L_exon_chr1:174989848	0.2283	0.093	-0.1353	NA	4	79.51	79.15	-0.36	NA
1368	CACYBP	893.788	953.053	0.0939	0.488354	NC	No	No	1	CACYBP_exon_chr1:175009922	1	1	0	NA	8	25.05	24.99	-0.06	NA
1369	MRPS14	170.99	164.558	-0.0625	1	NC	No	No	1	MRPS14_exon_chr1:175014851	1	1	0	NA	5	89.38	93.32	3.93	NA
1370	KIAA0040	106.201	92.6238	-0.1905	0.915076	NC	No	No	1	KIAA0040_exon_chr1:175161146	1	1	0	NA	6	19.63	19.06	-0.57	NA
1371	COP1	184.6	204.101	0.1504	0.701672	NC	No	No	1	COP1_exon_chr1:175945170	1	1	0	NA	1
1372	CRYZL2P	32.6903	19.3852	-0.7729	1	NC	No	No	1	CRYZL2P_exon_chr1:178008149	1	1	0	NA	1
1373	RASAL2	33.9535	47.3572	0.4739	0.78059	NC	No	No	1	RASAL2_exon_chr1:178473074	1	1	0	NA	6	86.35	76.52	-9.83	NA
1374	RALGPS2	47.5097	71.7737	0.5893	0.30743	NC	No	No	1	RALGPS2_exon_chr1:178916329	1	1	0	NA	11	63.6	58.27	-5.33	NA
1375	FAM20B	271.844	280.425	0.0511	1	NC	No	No	1	FAM20B_exon_chr1:179071912	1	1	0	NA	1
1376	TOR3A	593.125	595.924	0.0126	0.885944	NC	No	No	1	TOR3A_exon_chr1:179094967	1	1	0	NA	1
1377	ABL2	33.9398	45.1822	0.3977	1	NC	No	No	1	ABL2_exon_chr1:179109441	1	1	0	NA	6	38.36	49.63	11.27	NA
1378	SOAT1	96.6191	122.601	0.3488	0.353699	NC	No	No	1	SOAT1_exon_chr1:179353584	1	1	0	NA	15	27.45	21.73	-5.72	NA
1379	TOR1AIP2	495.901	539.655	0.125	0.480842	NC	No	No	3	TOR1AIP2_exon_chr1:179846828	0.4039	0.4658	0.0619	NA	13	57.09	56.33	-0.76	NA
1380	TOR1AIP2									TOR1AIP2_exon_chr1:179847636	0.1898	0.1732	-0.0166	NA	1
1381	TOR1AIP2									TOR1AIP2_exon_chr1:179865854	0.4005	0.3583	-0.0422	NA	7	10.22	11.38	1.16	NA
1382	TOR1AIP1	79.2347	90.4264	0.1685	1	NC	No	No	1	TOR1AIP1_exon_chr1:179917451	1	1	0	NA	7	94	93.61	-0.39	NA
1383	CEP350	146.462	139.547	-0.065	1	NC	No	No	4	CEP350_exon_chr1:180013846	0.1068	0.0929	-0.0139	NA	1
1384	CEP350									CEP350_exon_chr1:180075021	0.1469	0.1121	-0.0348	NA	2	85.15	95.81	10.66	NA
1385	CEP350									CEP350_exon_chr1:180084017	0.0738	0.0603	-0.0135	NA	3	19.14	23	3.86	NA
1386	CEP350									CEP350_exon_chr1:180110996	0.5563	0.6054	0.0491	NA	3	80.03	74.1	-5.94	NA
1387	QSOX1	272.526	274.063	0.0059	1	NC	No	No	1	QSOX1_exon_chr1:180196261	1	1	0	NA	6	41.69	37.52	-4.17	NA
1388	ACBD6	165.803	170.596	0.0286	1	NC	No	No	3	ACBD6_exon_chr1:180271971	0.0523	0.0624	0.0101	NA	1
1389	ACBD6									ACBD6_exon_chr1:180288517	0.8802	0.8507	-0.0295	NA	1
1390	ACBD6									ACBD6_exon_chr1:180413471	0.0601	0.08	0.0199	NA	1
1391	XPR1	172.683	138.536	-0.3105	0.352251	NC	No	No	1	XPR1_exon_chr1:180884005	1	1	0	NA	9	69.43	66.43	-3	NA
1392	AL162431.1	166.745	138.697	-0.2755	0.405204	NC	No	No	1	AL162431.1_exon_chr1:180976646	1	1	0	NA	7	73.02	70.67	-2.35	NA
1393	KIAA1614-AS1	16.6324	15.7775	-0.0987	1	NC	No	No	1	KIAA1614-AS1_exon_chr1:180950918	1	1	0	NA	1
1394	MR1	9.9186	15.2475	0.5879	1	NC	No	No	2	MR1_exon_chr1:181050010	0.1686	0.0532	-0.1154	NA	1
1395	MR1									MR1_exon_chr1:181055224	0.8314	0.9468	0.1154	NA	6	36.99	23.24	-13.75	NA
1396	IER5	194.793	196.414	0.0104	1	NC	No	No	1	IER5_exon_chr1:181088699	1	1	0	NA	1
1397	EIF1P3	499.698	542.815	0.119	0.456065	NC	No	No	1	EIF1P3_exon_chr1:182336000	1	1	0	NA	1
1398	GLUL	363.429	391.849	0.1059	0.558009	NC	No	No	1	GLUL_exon_chr1:182387292	1	1	0	NA	1
1399	RNASEL	13.1125	17.4339	0.3731	1	NC	No	No	2	RNASEL_exon_chr1:182575578	0.9074	0.7801	-0.1273	NA	2	71.48	68.14	-3.34	NA
1400	RNASEL									RNASEL_exon_chr1:182576389	0.0926	0.2199	0.1273	NA	1
1401	RGS16	11.9185	9.6781	-0.2922	1	NC	No	No	1	RGS16_exon_chr1:182600513	1	1	0	NA	1
1402	AL355999.1	15.7225	11.968	-0.3602	1	NC	No	No	1	AL355999.1_exon_chr1:182837934	1	1	0	NA	1
1403	DHX9	455.705	458.959	0.0066	0.89562	NC	No	No	1	DHX9_exon_chr1:182887082	1	1	0	NA	6	91.71	89.21	-2.49	NA
1404	HMGN1P4	48.8038	41.8652	-0.2117	1	NC	No	No	1	HMGN1P4_exon_chr1:182942404	1	1	0	NA	2	63.95	66.04	2.09	NA
1405	LAMC1	251.851	262.181	0.0533	1	NC	No	No	2	LAMC1_exon_chr1:183137668	0.2915	0.2312	-0.0604	NA	2	6.86	10.43	3.57	NA
1406	LAMC1									LAMC1_exon_chr1:183142533	0.6906	0.7297	0.0391	NA	7	50.71	60.12	9.41	NA
1407	LAMC2	47.6259	41.3282	-0.2031	1	NC	No	No	2	LAMC2_exon_chr1:183237351	0.2266	0.0789	-0.1477	NA	1
1408	LAMC2									LAMC2_exon_chr1:183243146	0.7734	0.9211	0.1477	NA	4	63.2	53.51	-9.69	NA
1409	SMG7	83.8026	75.9515	-0.1321	1	NC	No	No	2	SMG7_exon_chr1:183545965	0.2613	0.2941	0.0328	NA	1
1410	SMG7									SMG7_exon_chr1:183551817	0.7387	0.7059	-0.0328	NA	6	86.72	81.9	-4.82	NA
1411	ARPC5	348.593	381.737	0.131	0.486242	NC	No	No	1	ARPC5_exon_chr1:183627594	1	1	0	NA	1
1412	TSEN15	281.067	250.123	-0.1615	0.647382	NC	No	No	2	TSEN15_exon_chr1:184072050	0.8124	0.7941	-0.0182	NA	1
1413	TSEN15									TSEN15_exon_chr1:184093624	0.1862	0.2039	0.0177	NA	1
1414	C1orf21	33.0496	47.1473	0.4944	0.750698	NC	No	No	2	C1orf21_exon_chr1:184507587	0.0988	0.0709	-0.0279	NA	1
1415	C1orf21									C1orf21_exon_chr1:184619517	0.9012	0.9291	0.0279	NA	6	13.26	10.53	-2.73	NA
1416	EDEM3	44.2912	52.0054	0.2158	1	NC	No	No	1	EDEM3_exon_chr1:184694472	1	1	0	NA	1
1417	NIBAN1	29.854	19.5939	-0.5736	1	NC	No	No	1	NIBAN1_exon_chr1:184796097	1	1	0	NA	4	27.77	35.87	8.1	NA
1418	RNF2	181.579	170.48	-0.0926	0.884405	NC	No	No	1	RNF2_exon_chr1:185100199	1	1	0	NA	8	56.17	57.14	0.98	NA
1419	TRMT1L	66.7803	77.544	0.22	0.831418	NC	No	No	1	TRMT1L_exon_chr1:185120271	1	1	0	NA	7	58.39	62.29	3.9	NA
1420	SWT1	21.5307	18.7448	-0.2048	1	NC	No	No	2	SWT1_exon_chr1:185160832	0.5148	0.5168	0.002	NA	1
1421	SWT1									SWT1_exon_chr1:185290673	0.4852	0.4832	-0.002	NA	4	66.11	68.5	2.39	NA
1422	AL356273.3	6.9996	6.3739	-0.1198	1	NC	No	No	1	AL356273.3_exon_chr1:185294372	1	1	0	NA	1
1423	IVNS1ABP	339.512	329.454	-0.0505	0.756196	NC	No	No	1	IVNS1ABP_exon_chr1:185300918	1	1	0	NA	11	36.26	35.37	-0.89	NA
1424	RNU6-1240P	127.974	147.439	0.2195	0.631976	NC	No	No	1	RNU6-1240P_exon_chr1:186314026	1	1	0	NA	1
1425	TPR	1240.14	1246.78	0.0077	0.88946	NC	No	No	6	TPR_exon_chr1:186336694	0.105	0.1104	0.0054	NA	2	41.3	41.99	0.68	NA
1426	TPR									TPR_exon_chr1:186343473	0.056	0.0595	0.0036	NA	4	52.58	54.92	2.33	NA
1427	TPR									TPR_exon_chr1:186360905	0.0897	0.0906	0.001	NA	1
1428	TPR									TPR_exon_chr1:186363001	0.1862	0.191	0.0049	NA	2	88.74	90.25	1.51	NA
1429	TPR									TPR_exon_chr1:186367982	0.1065	0.1222	0.0157	NA	1
1430	TPR									TPR_exon_chr1:186371043	0.1798	0.1658	-0.014	NA	1
1431	ODR4	136.302	139.658	0.0494	1	NC	No	No	1	ODR4_exon_chr1:186419008	1	1	0	NA	8	56.05	55.67	-0.38	NA
1432	PLA2G4A	34.2931	46.4602	0.4338	0.885117	NC	No	No	1	PLA2G4A_exon_chr1:186988376	1	1	0	NA	1
1433	RGS2	117.972	56.4835	-1.0416	0.000136919	DOWN	No	No	1	RGS2_exon_chr1:192810165	1	1	0	NA	1
1434	AL390957.1	29.3642	18.97	-0.613	0.84976	NC	No	No	1	AL390957.1_exon_chr1:192935903	1	1	0	NA	1
1435	UCHL5	324.857	316.812	-0.0371	0.813909	NC	No	No	2	UCHL5_exon_chr1:193016395	0.8848	0.8705	-0.0143	NA	17	30.71	27.38	-3.32	NA
1436	UCHL5									UCHL5_exon_chr1:193023039	0.0856	0.0986	0.013	NA	1
1437	SCARNA18B	8.722	10.8847	0.3466	1	NC	No	No	1	SCARNA18B_exon_chr1:193057415	1	1	0	NA	1
1438	RO60	284.688	303.827	0.0886	0.829033	NC	No	No	2	RO60_exon_chr1:193084578	0.1445	0.2027	0.0583	NA	13	30.85	36.16	5.3	NA
1439	RO60									RO60_exon_chr1:193091650	0.8336	0.785	-0.0486	NA	2	93.98	95.18	1.2	NA
1440	GLRX2	230.011	238.421	0.0603	1	NC	No	No	2	GLRX2_exon_chr1:193095249	0.0806	0.0534	-0.0272	NA	3	89.91	90.3	0.39	NA
1441	GLRX2									GLRX2_exon_chr1:193096759	0.9194	0.9466	0.0272	NA	1
1442	CDC73	151.357	154.212	0.0278	1	NC	No	No	3	CDC73_exon_chr1:193150303	0.1156	0.1232	0.0076	NA	1
1443	CDC73									CDC73_exon_chr1:193232992	0.0711	0.0431	-0.0281	NA	1
1444	CDC73									CDC73_exon_chr1:193250675	0.7698	0.8115	0.0417	NA	13	45.57	50.11	4.54	NA
1445	ASPM	396.337	391.339	-0.0171	0.860514	NC	No	No	4	ASPM_exon_chr1:197084426	0.3038	0.2769	-0.027	NA	2	26.87	33.98	7.1	NA
1446	ASPM									ASPM_exon_chr1:197105185	0.3182	0.3134	-0.0047	NA	6	70.56	73.78	3.22	NA
1447	ASPM									ASPM_exon_chr1:197143810	0.2999	0.3275	0.0276	NA	4	70.29	63.34	-6.95	NA
1448	ASPM									ASPM_exon_chr1:197144100	0.076	0.0774	0.0015	NA	1
1449	ZBTB41	26.8352	30.0545	0.1291	1	NC	No	No	1	ZBTB41_exon_chr1:197160014	1	1	0	NA	5	50.32	60.31	9.99	NA
1450	DENND1B	37.0988	61.288	0.7183	0.210933	NC	No	No	2	DENND1B_exon_chr1:197510972	0.8034	0.8932	0.0898	NA	6	83.34	64.81	-18.53	NA
1451	DENND1B									DENND1B_exon_chr1:197541015	0.1855	0.0985	-0.0871	NA	1
1452	C1orf53	43.1766	44.7884	0.0725	1	NC	No	No	1	C1orf53_exon_chr1:197907148	1	1	0	NA	2	92.48	92.09	-0.39	NA
1453	NEK7	120.984	133.54	0.1462	0.815811	NC	No	No	1	NEK7_exon_chr1:198319411	1	1	0	NA	1
1454	AC096631.2	297.814	296.734	-0.0019	1	NC	No	No	1	AC096631.2_exon_chr1:198949015	1	1	0	NA	1
1455	ZNF281	67.5375	77.8575	0.2138	0.884405	NC	No	No	1	ZNF281_exon_chr1:200409723	1	1	0	NA	6	87.31	84.95	-2.36	NA
1456	KIF14	149.631	137.636	-0.1136	0.909951	NC	No	No	3	KIF14_exon_chr1:200553767	0.7906	0.7879	-0.0027	NA	1
1457	KIF14									KIF14_exon_chr1:200589369	0.1379	0.185	0.0472	NA	3	34.43	32.35	-2.08	NA
1458	KIF14									KIF14_exon_chr1:200618838	0.0715	0.0271	-0.0444	NA	1
1459	DDX59	38.0922	29.8503	-0.3299	1	NC	No	No	4	DDX59_exon_chr1:200641256	0.1198	0.203	0.0833	NA	2	60.98	81.79	20.81	NA
1460	DDX59									DDX59_exon_chr1:200644517	0.5568	0.5427	-0.0141	NA	2	32.02	31.49	-0.53	NA
1461	DDX59									DDX59_exon_chr1:200649226	0.0648	0.0912	0.0264	NA	1
1462	DDX59									DDX59_exon_chr1:200650676	0.2586	0.163	-0.0956	NA	1
1463	CAMSAP2	250.34	298.034	0.2571	0.236695	NC	No	No	3	CAMSAP2_exon_chr1:200848031	0.5474	0.5298	-0.0176	NA	7	18.27	17.51	-0.76	NA
1464	CAMSAP2									CAMSAP2_exon_chr1:200852540	0.0745	0.0661	-0.0084	NA	2	59.23	74.95	15.72	NA
1465	CAMSAP2									CAMSAP2_exon_chr1:200857305	0.3682	0.394	0.0258	NA	5	73.48	69.68	-3.8	NA
1466	INAVA	22.2442	21.3423	-0.0737	1	NC	No	No	1	INAVA_exon_chr1:200913536	1	1	0	NA	1
1467	KIF21B	10.878	8.7907	-0.2519	1	NC	No	No	1	KIF21B_exon_chr1:200974194	1	1	0	NA	3	83.36	86.23	2.87	NA
1468	ASCL5	6.5968	10.7189	0.7051	1	NC	No	No	1	ASCL5_exon_chr1:201115877	1	1	0	NA	1
1469	TMEM9	181.232	175.798	-0.0509	1	NC	No	No	1	TMEM9_exon_chr1:201135815	1	1	0	NA	2	89.81	90.31	0.5	NA
1470	LAD1	125.865	143.311	0.178	0.723259	NC	No	No	1	LAD1_exon_chr1:201381893	1	1	0	NA	1
1471	AC096677.2	248.306	216.665	-0.2032	0.445753	NC	No	No	1	AC096677.2_exon_chr1:201466178	1	1	0	NA	1
1472	CSRP1	521.987	491.147	-0.0952	0.616594	NC	No	No	1	CSRP1_exon_chr1:201484789	1	1	0	NA	1
1473	AC096677.1	21.0535	13.8436	-0.5901	1	NC	No	No	1	AC096677.1_exon_chr1:201533447	1	1	0	NA	2	61.88	87.19	25.31	NA
1474	NAV1	71.3731	84.7629	0.2358	0.767053	NC	No	No	1	NAV1_exon_chr1:201819836	1	1	0	NA	3	33.22	33.38	0.17	NA
1475	IPO9	338.296	311.92	-0.1154	0.568336	NC	No	No	1	IPO9_exon_chr1:201875943	1	1	0	NA	22	38.24	40.14	1.9	NA
1476	SHISA4	168.611	181.113	0.0944	0.98006	NC	No	No	1	SHISA4_exon_chr1:201891799	1	1	0	NA	1
1477	AL513217.1	5.0212	11.8935	1.2208	1	NC	No	No	1	AL513217.1_exon_chr1:201899729	1	1	0	NA	1
1478	TIMM17A	801.139	916.598	0.1967	0.200531	NC	No	No	1	TIMM17A_exon_chr1:201969468	1	1	0	NA	8	70.58	69.53	-1.05	NA
1479	RNPEP	204.935	183.115	-0.1585	0.651359	NC	No	No	1	RNPEP_exon_chr1:202005557	1	1	0	NA	1
1480	AL691482.3	121.14	91.7243	-0.4159	0.267769	NC	No	No	1	AL691482.3_exon_chr1:202014885	1	1	0	NA	6	16.74	12.6	-4.14	NA
1481	ARL8A	49.1272	65.8753	0.4003	0.913338	NC	No	No	1	ARL8A_exon_chr1:202134516	1	1	0	NA	1
1482	UBE2T	183.542	212.037	0.2087	0.553326	NC	No	No	1	UBE2T_exon_chr1:202331960	1	1	0	NA	2	94.75	94.37	-0.38	NA
1483	AC099336.2	15307.7	15525	0.0201	0.746135	NC	No	No	1	AC099336.2_exon_chr1:202472117	1	1	0	NA	1
1484	PPP1R12B	20.7496	18.4745	-0.1501	1	NC	No	No	1	PPP1R12B_exon_chr1:202580473	1	1	0	NA	1
1485	KDM5B	54.9592	60.0176	0.1165	1	NC	No	No	3	KDM5B_exon_chr1:202734315	0.8578	0.7879	-0.0699	NA	8	62.78	53.8	-8.98	NA
1486	KDM5B									KDM5B_exon_chr1:202735587	0.0379	0.0621	0.0242	NA	1
1487	KDM5B									KDM5B_exon_chr1:202762945	0.1043	0.15	0.0457	NA	1
1488	AC098934.3	9.3844	12.1817	0.3529	1	NC	No	No	1	AC098934.3_exon_chr1:202767418	1	1	0	NA	2	93.95	93.27	-0.67	NA
1489	RABIF	52.5959	60.8436	0.2006	1	NC	No	No	1	RABIF_exon_chr1:202881223	1	1	0	NA	7	26.84	18.58	-8.26	NA
1490	KLHL12	43.1645	39.1033	-0.1513	1	NC	No	No	1	KLHL12_exon_chr1:202892659	1	1	0	NA	5	75.91	85.14	9.23	NA
1491	ADIPOR1	688.494	738.213	0.0982	0.537049	NC	No	No	1	ADIPOR1_exon_chr1:202941701	1	1	0	NA	1
1492	CYB5R1	60.4773	62.7649	0.0496	1	NC	No	No	1	CYB5R1_exon_chr1:202963559	1	1	0	NA	1
1493	TMEM183A	327.275	354.743	0.1182	0.51779	NC	No	No	1	TMEM183A_exon_chr1:203022854	1	1	0	NA	7	32.88	26.48	-6.4	NA
1494	PPFIA4	30.0572	28.2271	-0.1322	1	NC	No	No	1	PPFIA4_exon_chr1:203075576	1	1	0	NA	1
1495	ADORA1	32.4863	30.7446	-0.0881	1	NC	No	No	1	ADORA1_exon_chr1:203165055	1	1	0	NA	1
1496	BTG2	119.453	116.876	-0.0466	1	NC	No	No	1	BTG2_exon_chr1:203307103	1	1	0	NA	1
1497	AL513343.1	90.608	74.9954	-0.2618	0.856928	NC	No	No	1	AL513343.1_exon_chr1:203657760	1	1	0	NA	1
1498	ATP2B4	268.089	243.049	-0.133	0.721039	NC	No	No	2	ATP2B4_exon_chr1:203700797	0.2605	0.2572	-0.0033	NA	1
1499	ATP2B4									ATP2B4_exon_chr1:203739545	0.7303	0.7351	0.0047	NA	3	91.36	90.15	-1.2	NA
1500	ZC3H11A	9.1052	7.7223	-0.2799	1	NC	No	No	1	ZC3H11A_exon_chr1:203847183	1	1	0	NA	2	59.18	41.24	-17.93	NA
1501	ZBED6	250.81	269.075	0.1038	0.860514	NC	No	No	1	ZBED6_exon_chr1:203852140	1	1	0	NA	4	89.78	90.08	0.3	NA
1502	SNRPE	1240.74	1221.65	-0.0196	0.814182	NC	No	No	1	SNRPE_exon_chr1:203869876	1	1	0	NA	4	35.13	31.48	-3.65	NA
1503	HSPE1P6	134.047	140.916	0.0651	1	NC	No	No	1	HSPE1P6_exon_chr1:203904013	1	1	0	NA	1
1504	SOX13	26.5586	19.849	-0.4468	1	NC	No	No	1	SOX13_exon_chr1:204125857	1	1	0	NA	2	76.92	81.93	5	NA
1505	ETNK2	43.016	60.595	0.4822	0.608	NC	No	No	1	ETNK2_exon_chr1:204132256	1	1	0	NA	1
1506	KISS1	9.514	10.3848	0.1504	1	NC	No	No	1	KISS1_exon_chr1:204190797	1	1	0	NA	1
1507	GOLT1A	66.0455	42.6198	-0.626	0.314919	NC	No	No	1	GOLT1A_exon_chr1:204198496	1	1	0	NA	1
1508	PLEKHA6	12.8044	10.9397	-0.1934	1	NC	No	No	1	PLEKHA6_exon_chr1:204222779	1	1	0	NA	3	45.92	70.14	24.22	NA
1509	AL592114.1	114.795	105.27	-0.127	1	NC	No	No	1	AL592114.1_exon_chr1:204347258	1	1	0	NA	2	40.34	47.84	7.5	NA
1510	PPP1R15B	224.731	231.531	0.0385	1	NC	No	No	1	PPP1R15B_exon_chr1:204406313	1	1	0	NA	8	73.91	76.67	2.76	NA
1511	PIK3C2B	7.8659	8.9369	0.1697	1	NC	No	No	1	PIK3C2B_exon_chr1:204425040	1	1	0	NA	1
1512	MDM4	168.553	188.009	0.1597	0.699147	NC	No	No	1	MDM4_exon_chr1:204549112	1	1	0	NA	11	90.3	84.92	-5.38	NA
1513	LRRN2	23.0815	19.6628	-0.2714	1	NC	No	No	1	LRRN2_exon_chr1:204622205	1	1	0	NA	1
1514	TMEM81	6.619	9.5762	0.535	1	NC	No	No	1	TMEM81_exon_chr1:205084460	1	1	0	NA	1
1515	RBBP5	33.9842	42.7765	0.3365	1	NC	No	No	1	RBBP5_exon_chr1:205088815	1	1	0	NA	4	86.56	85.85	-0.71	NA
1516	DSTYK	45.5757	41.8017	-0.1487	1	NC	No	No	1	DSTYK_exon_chr1:205147745	1	1	0	NA	4	86.92	80.86	-6.05	NA
1517	TMCC2	21.5135	14.5147	-0.5891	1	NC	No	No	1	TMCC2_exon_chr1:205271812	1	1	0	NA	1
1518	NUAK2	17.928	15.5843	-0.192	1	NC	No	No	1	NUAK2_exon_chr1:205304513	1	1	0	NA	2	87.82	79.65	-8.17	NA
1519	CDK18	40.8379	33.9387	-0.2529	1	NC	No	No	1	CDK18_exon_chr1:205531343	1	1	0	NA	1
1520	ELK4	156.909	159.13	0.0206	1	NC	No	No	2	ELK4_exon_chr1:205616644	0.7867	0.8165	0.0297	NA	1
1521	ELK4									ELK4_exon_chr1:205620838	0.2133	0.1835	-0.0297	NA	1
1522	SLC45A3	27.291	29.8944	0.1571	1	NC	No	No	1	SLC45A3_exon_chr1:205659671	1	1	0	NA	1
1523	NUCKS1	8529.92	6872.83	-0.3112	0.000152297	NC	No	No	3	NUCKS1_exon_chr1:205718479	0.1328	0.1608	0.028	NA	19	88.47	88.28	-0.19	NA
1524	NUCKS1									NUCKS1_exon_chr1:205719726	0.8085	0.7736	-0.0349	NA	2	82.97	84.03	1.06	NA
1525	NUCKS1									NUCKS1_exon_chr1:205720653	0.0577	0.065	0.0073	NA	1
1526	RAB29	109.824	120.809	0.1348	0.824118	NC	No	No	1	RAB29_exon_chr1:205770453	1	1	0	NA	1
1527	SLC41A1	48.2088	63.1917	0.3947	0.871402	NC	No	No	1	SLC41A1_exon_chr1:205791718	1	1	0	NA	1
1528	FAM72A	140.447	171.563	0.3011	0.323732	NC	No	No	1	FAM72A_exon_chr1:206187373	1	1	0	NA	5	66.34	60.19	-6.15	NA
1529	SRGAP2	200.018	186.65	-0.1	0.903468	NC	No	No	3	SRGAP2_exon_chr1:206406376	0.083	0.12	0.037	NA	3	28.58	18.58	-10	NA
1530	SRGAP2									SRGAP2_exon_chr1:206453660	0.166	0.1626	-0.0033	NA	1
1531	SRGAP2									SRGAP2_exon_chr1:206461036	0.7511	0.7174	-0.0337	NA	1
1532	IKBKE	22.012	24.1294	0.1083	1	NC	No	No	2	IKBKE_exon_chr1:206474802	0.3054	0.2657	-0.0397	NA	1
1533	IKBKE									IKBKE_exon_chr1:206496111	0.6946	0.7343	0.0397	NA	1
1534	RASSF5	20.0071	26.2217	0.3944	1	NC	No	No	1	RASSF5_exon_chr1:206584386	1	1	0	NA	1
1535	EIF2D	254.608	194.522	-0.3912	0.0435338	DOWN	No	No	2	EIF2D_exon_chr1:206591845	0.8796	0.9106	0.031	NA	1
1536	EIF2D									EIF2D_exon_chr1:206595838	0.1204	0.0894	-0.031	NA	2	42.66	56.18	13.52	NA
1537	DYRK3	74.3662	63.5282	-0.1965	1	NC	No	No	1	DYRK3_exon_chr1:206647387	1	1	0	NA	5	70.53	72.52	1.99	NA
1538	MAPKAPK2	182.239	228.379	0.3188	0.200531	NC	No	No	1	MAPKAPK2_exon_chr1:206731805	1	1	0	NA	2	93.68	93.67	-0.01	NA
1539	AC098935.1	48.2155	49.4591	0.0481	1	NC	No	No	1	AC098935.1_exon_chr1:206907618	1	1	0	NA	1
1540	C1orf116	11.134	5.4877	-1.0102	1	NC	No	No	1	C1orf116_exon_chr1:207023480	1	1	0	NA	5	44.72	46.55	1.83	NA
1541	YOD1	89.1143	127.112	0.5092	0.105444	NC	No	No	1	YOD1_exon_chr1:207049723	1	1	0	NA	10	93.86	91.9	-1.96	NA
1542	PFKFB2	51.2252	58.7884	0.2065	1	NC	No	No	1	PFKFB2_exon_chr1:207072203	1	1	0	NA	5	71.13	57.99	-13.14	NA
1543	CD55	144.833	142.575	-0.0293	1	NC	No	No	1	CD55_exon_chr1:207359545	1	1	0	NA	7	88.66	91.99	3.33	NA
1544	CR2	11.5642	10.1017	-0.1924	1	NC	No	No	1	CR2_exon_chr1:207489141	1	1	0	NA	1
1545	CD46	125.478	131.425	0.0665	1	NC	No	No	1	CD46_exon_chr1:207793518	1	1	0	NA	6	89.28	91.98	2.7	NA
1546	ATP5MC2P1	9.5329	12.382	0.3904	1	NC	No	No	1	ATP5MC2P1_exon_chr1:209268223	1	1	0	NA	1
1547	LAMB3	614.666	603.039	-0.0334	0.805747	NC	No	No	1	LAMB3_exon_chr1:209615407	1	1	0	NA	1
1548	C1orf74	49.6529	56.645	0.2005	1	NC	No	No	1	C1orf74_exon_chr1:209783709	1	1	0	NA	6	37.95	31.23	-6.71	NA
1549	IRF6	108.45	80.4235	-0.4346	0.191077	NC	No	No	1	IRF6_exon_chr1:209788644	1	1	0	NA	6	27.54	28.41	0.86	NA
1550	UTP25	67.8123	77.6468	0.202	1	NC	No	No	1	UTP25_exon_chr1:209851203	1	1	0	NA	8	17.59	22.91	5.32	NA
1551	ST13P19	43.9125	39.9594	-0.1398	1	NC	No	No	1	ST13P19_exon_chr1:210266182	1	1	0	NA	1
1552	RNU5A-8P	16.5888	10.8611	-0.6065	1	NC	No	No	1	RNU5A-8P_exon_chr1:210374267	1	1	0	NA	3	87.89	74.37	-13.52	NA
1553	AC092017.1	7.5049	7.2489	-0.0709	1	NC	No	No	1	AC092017.1_exon_chr1:211207238	1	1	0	NA	1
1554	RCOR3	89.6528	76.6005	-0.2306	0.906783	NC	No	No	2	RCOR3_exon_chr1:211260928	0.1148	0.1038	-0.011	NA	1
1555	RCOR3									RCOR3_exon_chr1:211312719	0.8852	0.8962	0.011	NA	9	63.38	58.52	-4.86	NA
1556	TRAF5	28.2	40.6768	0.5415	1	NC	No	No	1	TRAF5_exon_chr1:211372127	1	1	0	NA	8	73.89	83.07	9.18	NA
1557	LINC00467	123.89	100.582	-0.3023	0.399828	NC	No	No	2	LINC00467_exon_chr1:211396766	0.2092	0.1797	-0.0295	NA	1
1558	LINC00467									LINC00467_exon_chr1:211432045	0.7875	0.8203	0.0328	NA	3	31.65	26.2	-5.45	NA
1559	SLC30A1	49.3995	57.6606	0.2208	1	NC	No	No	1	SLC30A1_exon_chr1:211576289	1	1	0	NA	5	70.47	73.32	2.85	NA
1560	NEK2	41.8434	41.1824	-0.0153	1	NC	No	No	1	NEK2_exon_chr1:211663652	1	1	0	NA	1
1561	LPGAT1	201.625	240.665	0.2594	0.274788	NC	No	No	1	LPGAT1_exon_chr1:211750050	1	1	0	NA	11	67.24	67.45	0.21	NA
1562	INTS7	186.313	178.363	-0.0644	1	NC	No	No	1	INTS7_exon_chr1:211942111	1	1	0	NA	3	25.18	26.58	1.41	NA
1563	RPL21P28	2772.27	2880.38	0.0544	0.570634	NC	No	No	1	RPL21P28_exon_chr1:212052006	1	1	0	NA	1
1564	DTL	60.3833	70.9193	0.2166	1	NC	No	No	1	DTL_exon_chr1:212102841	1	1	0	NA	6	64.88	61.9	-2.98	NA
1565	PPP2R5A	384.394	358.638	-0.0936	0.625409	NC	No	No	1	PPP2R5A_exon_chr1:212360637	1	1	0	NA	1
1566	PACC1	108.162	102.401	-0.0657	1	NC	No	No	1	PACC1_exon_chr1:212365376	1	1	0	NA	4	84.29	77.99	-6.3	NA
1567	NENF	844.259	828.349	-0.0286	0.782686	NC	No	No	1	NENF_exon_chr1:212445829	1	1	0	NA	2	15.13	14.93	-0.2	NA
1568	ATF3	55.6379	49.163	-0.192	1	NC	No	No	1	ATF3_exon_chr1:212618126	1	1	0	NA	2	95.28	93.7	-1.58	NA
1569	BATF3	20.3169	28.6442	0.4972	1	NC	No	No	1	BATF3_exon_chr1:212686979	1	1	0	NA	2	42.22	40.09	-2.13	NA
1570	NSL1	98.4208	113.43	0.1919	0.834238	NC	No	No	1	NSL1_exon_chr1:212738686	1	1	0	NA	11	36.26	32.88	-3.38	NA
1571	TATDN3	93.7179	84.5627	-0.1365	1	NC	No	No	1	TATDN3_exon_chr1:212815012	1	1	0	NA	5	36.81	41.75	4.94	NA
1572	AC104333.2	12.4049	6.2001	-1.0133	1	NC	No	No	1	AC104333.2_exon_chr1:212857172	1	1	0	NA	3	66.84	79.36	12.52	NA
1573	FLVCR1	80.9042	83.1143	0.051	1	NC	No	No	1	FLVCR1_exon_chr1:212895215	1	1	0	NA	4	46.4	45.87	-0.53	NA
1574	VASH2	18.574	25.3672	0.4521	1	NC	No	No	1	VASH2_exon_chr1:212988511	1	1	0	NA	1
1575	ANGEL2	81.4821	59.1113	-0.4631	0.267769	NC	No	No	2	ANGEL2_exon_chr1:212995192	0.834	0.8216	-0.0124	NA	4	90.6	90.52	-0.08	NA
1576	ANGEL2									ANGEL2_exon_chr1:213007198	0.166	0.1784	0.0124	NA	2	32.87	61.28	28.41	NA
1577	RPS6KC1	177.102	180.185	0.019	1	NC	No	No	1	RPS6KC1_exon_chr1:213272523	1	1	0	NA	1
1578	SMYD2	140.235	122.782	-0.1857	0.721039	NC	No	No	1	SMYD2_exon_chr1:214336698	1	1	0	NA	1
1579	AL929236.1	38.95	36.0984	-0.0795	1	NC	No	No	1	AL929236.1_exon_chr1:214358050	1	1	0	NA	5	88.64	82.2	-6.44	NA
1580	ABHD17AP3	5.809	8.4884	0.5433	1	NC	No	No	1	ABHD17AP3_exon_chr1:214606079	1	1	0	NA	1
1581	CENPF	2737.11	2295.48	-0.253	0.0178203	NC	No	No	8	CENPF_exon_chr1:214613713	0.1341	0.1331	-0.001	NA	4	93.1	94.27	1.17	NA
1582	CENPF									CENPF_exon_chr1:214614831	0.1398	0.1371	-0.0027	NA	2	74.4	74.17	-0.23	NA
1583	CENPF									CENPF_exon_chr1:214619128	0.0603	0.0644	0.0042	NA	1
1584	CENPF									CENPF_exon_chr1:214622078	0.0761	0.0836	0.0076	NA	2	86.69	86.96	0.27	NA
1585	CENPF									CENPF_exon_chr1:214629045	0.0538	0.0567	0.0029	NA	3	36.38	43.79	7.41	NA
1586	CENPF									CENPF_exon_chr1:214639920	0.3088	0.2991	-0.0097	NA	9	52.88	53.64	0.76	NA
1587	CENPF									CENPF_exon_chr1:214644556	0.1215	0.1107	-0.0107	NA	12	60.06	62.32	2.26	NA
1588	CENPF									CENPF_exon_chr1:214663590	0.0836	0.094	0.0104	NA	5	17.05	15.26	-1.79	NA
1589	KCTD3	309.467	307.618	-0.0004	1	NC	No	No	1	KCTD3_exon_chr1:215620056	1	1	0	NA	6	55.46	64.6	9.14	NA
1590	GPATCH2	37.1533	37.1434	-0.0109	1	NC	No	No	2	GPATCH2_exon_chr1:217431365	0.7761	0.8906	0.1145	NA	3	61.45	66.01	4.57	NA
1591	GPATCH2									GPATCH2_exon_chr1:217610192	0.2239	0.1094	-0.1145	NA	3	49.33	84.19	34.86	NA
1592	SPATA17	9.87	6.7687	-0.6031	1	NC	No	No	1	SPATA17_exon_chr1:217866877	1	1	0	NA	2	14.58	11.9	-2.67	NA
1593	RRP15	695.852	809.976	0.2236	0.107641	NC	No	No	3	RRP15_exon_chr1:218285292	0.0789	0.0572	-0.0217	NA	1
1594	RRP15									RRP15_exon_chr1:218302293	0.6496	0.613	-0.0366	NA	2	93.5	92.47	-1.03	NA
1595	RRP15									RRP15_exon_chr1:218330947	0.2715	0.3298	0.0583	NA	6	70.78	73.22	2.44	NA
1596	LYPLAL1	216.85	212.755	-0.0128	1	NC	No	No	1	LYPLAL1_exon_chr1:219211491	1	1	0	NA	2	9.26	7	-2.26	NA
1597	EPRS	560.406	530.313	-0.0809	0.616594	NC	No	No	2	EPRS_exon_chr1:219968956	0.8158	0.8684	0.0526	NA	1
1598	EPRS									EPRS_exon_chr1:219984258	0.0666	0.0526	-0.014	NA	1
1599	BPNT1	58.817	73.3307	0.2935	1	NC	No	No	1	BPNT1_exon_chr1:220058992	1	1	0	NA	4	35.98	47.33	11.36	NA
1600	IARS2	586.016	640.43	0.1293	0.450935	NC	No	No	1	IARS2_exon_chr1:220147492	1	1	0	NA	1
1601	RPS15AP12	110.806	110.362	-0.013	1	NC	No	No	1	RPS15AP12_exon_chr1:220144351	1	1	0	NA	1
1602	RAB3GAP2	19.07	29.0139	0.622	1	NC	No	No	1	RAB3GAP2_exon_chr1:220151764	1	1	0	NA	3	25.38	33.79	8.4	NA
1603	MARK1	14.4517	14.0412	-0.0555	1	NC	No	No	1	MARK1_exon_chr1:220661811	1	1	0	NA	3	18.05	30.54	12.49	NA
1604	C1orf115	26.9317	24.0174	-0.1908	1	NC	No	No	1	C1orf115_exon_chr1:220696611	1	1	0	NA	3	95.59	92.77	-2.82	NA
1605	2020-03-02	28.9416	22.0603	-0.4246	1	NC	No	No	1	MARC2_exon_chr1:220783918	1	1	0	NA	2	63.06	29.48	-33.58	NA
1606	2020-03-01	79.0752	70.7335	-0.143	1	NC	No	No	1	MARC1_exon_chr1:220813291	1	1	0	NA	5	5.88	8.34	2.46	NA
1607	TAF1A	36.1615	41.7795	0.2072	1	NC	No	No	1	TAF1A_exon_chr1:222558772	1	1	0	NA	1
1608	MIA3	94.7893	88.9149	-0.1061	1	NC	No	No	2	MIA3_exon_chr1:222627574	0.3129	0.3121	-0.0007	NA	3	29.6	31.86	2.26	NA
1609	MIA3									MIA3_exon_chr1:222664882	0.5947	0.5784	-0.0163	NA	9	26.68	23.22	-3.46	NA
1610	AL592148.3	21.1244	14.6234	-0.5252	1	NC	No	No	1	AL592148.3_exon_chr1:222661512	1	1	0	NA	4	41.76	46.93	5.17	NA
1611	AIDA	316.351	340.101	0.1028	0.620993	NC	No	No	1	AIDA_exon_chr1:222670250	1	1	0	NA	6	88.57	88.92	0.36	NA
1612	BROX	150.138	148.593	-0.0215	1	NC	No	No	2	BROX_exon_chr1:222713587	0.2739	0.2128	-0.0611	NA	1
1613	BROX									BROX_exon_chr1:222732627	0.7261	0.7872	0.0611	NA	1
1614	AL392172.1	15.2156	24.6827	0.6651	1	NC	No	No	1	AL392172.1_exon_chr1:222836922	1	1	0	NA	1
1615	DISP1	16.896	22.3116	0.4083	1	NC	No	No	1	DISP1_exon_chr1:223002384	1	1	0	NA	1
1616	CAPN2	760.129	671	-0.1842	0.14466	NC	No	No	1	CAPN2_exon_chr1:223774833	1	1	0	NA	10	22.78	22.91	0.14	NA
1617	TP53BP2	68.0871	73.0518	0.0957	1	NC	No	No	2	TP53BP2_exon_chr1:223780894	0.8767	0.9549	0.0782	NA	2	19.71	26.86	7.16	NA
1618	TP53BP2									TP53BP2_exon_chr1:223804348	0.099	0.0359	-0.0631	NA	2	75	45.83	-29.17	NA
1619	GTF2IP20	20.3391	9.5167	-1.1033	0.855359	NC	No	No	1	GTF2IP20_exon_chr1:223953439	1	1	0	NA	2	28.7	24.78	-3.92	NA
1620	FBXO28	136.031	164.834	0.2809	0.408002	NC	No	No	1	FBXO28_exon_chr1:224157351	1	1	0	NA	10	78.51	78.12	-0.38	NA
1621	AC092809.3	12.1215	13.5485	0.2049	1	NC	No	No	1	AC092809.3_exon_chr1:224175706	1	1	0	NA	1
1622	DEGS1	334.733	382.481	0.1925	0.258133	NC	No	No	1	DEGS1_exon_chr1:224192331	1	1	0	NA	4	27.57	25.08	-2.5	NA
1623	NVL	65.3072	55.5421	-0.2446	1	NC	No	No	3	NVL_exon_chr1:224227670	0.5016	0.5038	0.0021	NA	1
1624	NVL									NVL_exon_chr1:224305166	0.3794	0.3989	0.0195	NA	1
1625	NVL									NVL_exon_chr1:224317930	0.0939	0.0942	0.0003	NA	1
1626	CNIH4	284.885	346.541	0.2748	0.121568	NC	No	No	1	CNIH4_exon_chr1:224375794	1	1	0	NA	3	10.71	11.02	0.31	NA
1627	WDR26	157.853	193.106	0.298	0.282099	NC	No	No	1	WDR26_exon_chr1:224389860	1	1	0	NA	9	15.03	8.27	-6.76	NA
1628	DNAH14	60.3183	53.2537	-0.1731	1	NC	No	No	5	DNAH14_exon_chr1:224952669	0.1354	0.1688	0.0334	NA	1
1629	DNAH14									DNAH14_exon_chr1:224954958	0.1234	0.1413	0.0179	NA	1
1630	DNAH14									DNAH14_exon_chr1:224967430	0.5286	0.5202	-0.0084	NA	3	86.26	64.32	-21.95	NA
1631	DNAH14									DNAH14_exon_chr1:224968758	0.0689	0.1	0.0311	NA	1
1632	DNAH14									DNAH14_exon_chr1:225399053	0.1437	0.0698	-0.074	NA	1
1633	LBR	374.033	429.268	0.1939	0.298434	NC	No	No	1	LBR_exon_chr1:225403463	1	1	0	NA	1
1634	ENAH	458.409	456.173	-0.0062	0.883777	NC	No	No	3	ENAH_exon_chr1:225497812	0.6648	0.7299	0.0651	NA	20	54.22	52.29	-1.93	NA
1635	ENAH									ENAH_exon_chr1:225498404	0.1652	0.1341	-0.0311	NA	1
1636	ENAH									ENAH_exon_chr1:225512714	0.1086	0.0758	-0.0327	NA	1
1637	SRP9	1900.72	1763.43	-0.1068	0.271946	NC	No	No	1	SRP9_exon_chr1:225789033	1	1	0	NA	1
1638	AL591895.1	48.7431	60.0866	0.2943	1	NC	No	No	2	AL591895.1_exon_chr1:225841187	0.3233	0.4087	0.0854	NA	2	87.59	97.7	10.11	NA
1639	AL591895.1									AL591895.1_exon_chr1:225847465	0.6767	0.5913	-0.0854	NA	2	74.21	58.39	-15.81	NA
1640	EPHX1	71.6093	75.7927	0.0682	1	NC	No	No	1	EPHX1_exon_chr1:225845145	1	1	0	NA	1
1641	PYCR2	311.029	300.673	-0.054	1	NC	No	No	1	PYCR2_exon_chr1:225920620	1	1	0	NA	1
1642	SDE2	81.7348	97.3691	0.2431	0.737118	NC	No	No	2	SDE2_exon_chr1:225985523	0.889	0.9252	0.0362	NA	4	95.21	93.06	-2.14	NA
1643	SDE2									SDE2_exon_chr1:225988388	0.111	0.0748	-0.0362	NA	1
1644	H3F3A	1821.48	1817.17	-0.0038	0.873869	NC	No	No	1	H3F3A_exon_chr1:226071350	1	1	0	NA	4	47.31	47.69	0.38	NA
1645	ACBD3	311.17	305.469	-0.0229	1	NC	No	No	3	ACBD3_exon_chr1:226146821	0.3294	0.3674	0.038	NA	5	77.78	71.46	-6.33	NA
1646	ACBD3									ACBD3_exon_chr1:226161689	0.1452	0.1462	0.0009	NA	1
1647	ACBD3									ACBD3_exon_chr1:226164929	0.5133	0.4769	-0.0364	NA	1
1648	LIN9	22.3201	25.5937	0.2025	1	NC	No	No	2	LIN9_exon_chr1:226233193	0.8184	0.8537	0.0353	NA	2	91.76	90.66	-1.1	NA
1649	LIN9									LIN9_exon_chr1:226250919	0.1816	0.1463	-0.0353	NA	1
1650	PARP1	958.859	944.584	-0.0189	0.821222	NC	No	No	1	PARP1_exon_chr1:226362252	1	1	0	NA	7	18.51	17.23	-1.28	NA
1651	CDKN2AIPNLP1	7.9368	5.9928	-0.3701	1	NC	No	No	1	CDKN2AIPNLP1_exon_chr1:226493489	1	1	0	NA	1
1652	ITPKB	19.8586	17.9886	-0.1191	1	NC	No	No	2	ITPKB_exon_chr1:226634886	0.9348	0.9265	-0.0082	NA	1
1653	ITPKB									ITPKB_exon_chr1:226707915	0.0652	0.0735	0.0082	NA	1
1654	PSEN2	61.096	78.3367	0.3539	0.503722	NC	No	No	1	PSEN2_exon_chr1:226895423	1	1	0	NA	1
1655	COQ8A	159.177	134.995	-0.2488	0.448934	NC	No	No	1	COQ8A_exon_chr1:226986452	1	1	0	NA	1
1656	CDC42BPA	362.777	330.861	-0.1331	0.484348	NC	No	No	3	CDC42BPA_exon_chr1:226994399	0.6624	0.67	0.0077	NA	6	61.71	67.65	5.94	NA
1657	CDC42BPA									CDC42BPA_exon_chr1:227101239	0.0446	0.0781	0.0336	NA	3	51.44	42.42	-9.02	NA
1658	CDC42BPA									CDC42BPA_exon_chr1:227119937	0.2875	0.2477	-0.0398	NA	1
1659	AL606462.1	163.077	171.311	0.058	1	NC	No	No	1	AL606462.1_exon_chr1:227429404	1	1	0	NA	1
1660	AL592310.1	12.8069	11.5734	-0.1552	1	NC	No	No	1	AL592310.1_exon_chr1:227599094	1	1	0	NA	1
1661	ZNF678	15.7993	19.729	0.3071	1	NC	No	No	1	ZNF678_exon_chr1:227654335	1	1	0	NA	5	82.02	81.88	-0.14	NA
1662	JMJD4	75.8633	78.5062	0.0375	1	NC	No	No	1	JMJD4_exon_chr1:227732676	1	1	0	NA	6	75.06	67.27	-7.79	NA
1663	SNAP47	108.135	104.523	-0.0482	1	NC	No	No	1	SNAP47_exon_chr1:227780526	1	1	0	NA	1
1664	WNT9A	31.0174	26.3899	-0.2172	1	NC	No	No	1	WNT9A_exon_chr1:227922000	1	1	0	NA	1
1665	WNT3A	10.2703	15.9542	0.6083	1	NC	No	No	1	WNT3A_exon_chr1:228058985	1	1	0	NA	2	38.5	29.06	-9.43	NA
1666	ARF1	1568.32	1540.86	-0.0291	0.76967	NC	No	No	1	ARF1_exon_chr1:228097077	1	1	0	NA	5	90.14	91.89	1.75	NA
1667	C1orf35	172.983	182.272	0.0811	1	NC	No	No	1	C1orf35_exon_chr1:228102688	1	1	0	NA	2	89.6	91	1.4	NA
1668	MRPL55	417.395	384.796	-0.116	0.503582	NC	No	No	1	MRPL55_exon_chr1:228106918	1	1	0	NA	1
1669	GUK1	765.665	742.4	-0.0485	0.737118	NC	No	No	1	GUK1_exon_chr1:228148090	1	1	0	NA	1
1670	GJC2	6.9501	7.8798	0.115	1	NC	No	No	1	GJC2_exon_chr1:228157739	1	1	0	NA	1
1671	IBA57	29.9333	37.8252	0.3381	1	NC	No	No	1	IBA57_exon_chr1:228175121	1	1	0	NA	4	27.39	41.04	13.65	NA
1672	OBSCN	53.3913	54.0342	0.0204	1	NC	No	No	5	OBSCN_exon_chr1:228217394	0.3641	0.2547	-0.1094	NA	3	87.28	91.65	4.37	NA
1673	OBSCN									OBSCN_exon_chr1:228288060	0.1471	0.1436	-0.0035	NA	1
1674	OBSCN									OBSCN_exon_chr1:228304302	0.1083	0.0772	-0.0311	NA	1
1675	OBSCN									OBSCN_exon_chr1:228359596	0.2323	0.3325	0.1002	NA	1
1676	OBSCN									OBSCN_exon_chr1:228378617	0.1244	0.159	0.0346	NA	1
1677	TRIM11	60.3124	61.2683	0.0188	1	NC	No	No	1	TRIM11_exon_chr1:228395252	1	1	0	NA	1
1678	HIST3H2A	24.3993	17.8269	-0.4777	1	NC	No	No	1	HIST3H2A_exon_chr1:228457873	1	1	0	NA	1
1679	RNF187	624.522	574.131	-0.1219	0.415951	NC	No	No	1	RNF187_exon_chr1:228493882	1	1	0	NA	1
1680	RHOU	8.6981	15.9501	0.8832	1	NC	No	No	1	RHOU_exon_chr1:228743284	1	1	0	NA	2	78.6	76.58	-2.03	NA
1681	AL162595.1	5.0468	7.0144	0.4766	1	NC	No	No	1	AL162595.1_exon_chr1:229269627	1	1	0	NA	2	85.76	76.93	-8.83	NA
1682	RAB4A	431.227	425.577	-0.0232	0.850765	NC	No	No	1	RAB4A_exon_chr1:229303805	1	1	0	NA	7	48.06	51.16	3.1	NA
1683	CCSAP	135.705	146.441	0.1111	0.924897	NC	No	No	1	CCSAP_exon_chr1:229325411	1	1	0	NA	5	94.07	91.16	-2.92	NA
1684	AL160004.1	277.958	272.39	-0.0232	1	NC	No	No	1	AL160004.1_exon_chr1:229442040	1	1	0	NA	6	91.81	91.12	-0.68	NA
1685	ABCB10	78.2659	69.5422	-0.1525	1	NC	No	No	1	ABCB10_exon_chr1:229518410	1	1	0	NA	3	79.99	84.24	4.25	NA
1686	TAF5L	169.649	143.978	-0.2162	0.614279	NC	No	No	2	TAF5L_exon_chr1:229595094	0.8883	0.8749	-0.0134	NA	2	90.15	89.75	-0.4	NA
1687	TAF5L									TAF5L_exon_chr1:229602919	0.1117	0.1251	0.0134	NA	1
1688	URB2	87.8006	93.1259	0.087	1	NC	No	No	1	URB2_exon_chr1:229659099	1	1	0	NA	5	58.49	63.07	4.58	NA
1689	GALNT2	172.447	230.276	0.4182	0.0500307	NC	No	No	2	GALNT2_exon_chr1:230178217	0.0649	0.0532	-0.0116	NA	1
1690	GALNT2									GALNT2_exon_chr1:230279302	0.9301	0.9425	0.0124	NA	4	72.55	70.34	-2.21	NA
1691	COG2	109.781	111.409	0.0322	1	NC	No	No	1	COG2_exon_chr1:230693291	1	1	0	NA	3	79.23	80.7	1.47	NA
1692	C1orf198	46.2875	42.6409	-0.1444	1	NC	No	No	1	C1orf198_exon_chr1:230839908	1	1	0	NA	8	91.71	78.86	-12.86	NA
1693	TTC13	15.7011	12.6692	-0.3215	1	NC	No	No	1	TTC13_exon_chr1:230907019	1	1	0	NA	2	84.16	67.96	-16.2	NA
1694	ARV1	6.2887	8.5795	0.4872	1	NC	No	No	1	ARV1_exon_chr1:231000137	1	1	0	NA	1
1695	FAM89A	125.492	85.3599	-0.5471	0.0956714	NC	No	No	1	FAM89A_exon_chr1:231020126	1	1	0	NA	4	90.79	94.27	3.48	NA
1696	C1orf131	324.408	255.635	-0.3371	0.137989	NC	No	No	3	C1orf131_exon_chr1:231225922	0.336	0.3522	0.0162	NA	3	72.64	83.13	10.48	NA
1697	C1orf131									C1orf131_exon_chr1:231226825	0.2635	0.2768	0.0133	NA	1
1698	C1orf131									C1orf131_exon_chr1:231239188	0.3863	0.3529	-0.0334	NA	1
1699	GNPAT	341.396	285.96	-0.2568	0.199664	NC	No	No	1	GNPAT_exon_chr1:231277498	1	1	0	NA	1
1700	EXOC8	109.792	119.319	0.1212	0.897544	NC	No	No	1	EXOC8_exon_chr1:231337852	1	1	0	NA	5	95.99	93.18	-2.81	NA
1701	SPRTN	57.575	74.2731	0.3797	0.895511	NC	No	No	1	SPRTN_exon_chr1:231351303	1	1	0	NA	10	62.12	68.8	6.68	NA
1702	AL445524.2	199.683	175.975	-0.1875	0.574063	NC	No	No	1	AL445524.2_exon_chr1:231366475	1	1	0	NA	6	80.5	82.8	2.29	NA
1703	AL445524.1	290.462	411.361	0.5017	0.000162169	UP	No	No	1	AL445524.1_exon_chr1:231522790	1	1	0	NA	1
1704	TSNAX	218.948	286.935	0.3881	0.0348769	UP	No	No	2	TSNAX_exon_chr1:231561127	0.0766	0.0373	-0.0393	NA	1
1705	TSNAX									TSNAX_exon_chr1:231564527	0.9234	0.9627	0.0393	NA	1
1706	SIPA1L2	24.4479	33.6929	0.4943	1	NC	No	No	1	SIPA1L2_exon_chr1:232399273	1	1	0	NA	2	76.48	96.1	19.62	NA
1707	NTPCR	125.998	113.641	-0.1509	0.766841	NC	No	No	2	NTPCR_exon_chr1:232976301	0.1371	0.1155	-0.0216	NA	1
1708	NTPCR									NTPCR_exon_chr1:232978162	0.8629	0.8845	0.0216	NA	8	33.49	33.89	0.4	NA
1709	PCNX2	35.075	30.0004	-0.2147	1	NC	No	No	2	PCNX2_exon_chr1:232986540	0.7899	0.8437	0.0538	NA	1
1710	PCNX2									PCNX2_exon_chr1:233095863	0.1276	0.0794	-0.0482	NA	1
1711	RPS7P3	13.1662	19.1892	0.553	1	NC	No	No	1	RPS7P3_exon_chr1:233289447	1	1	0	NA	1
1712	MAP3K21	45.3991	47.488	0.0658	1	NC	No	No	2	MAP3K21_exon_chr1:233375782	0.1731	0.1363	-0.0368	NA	1
1713	MAP3K21									MAP3K21_exon_chr1:233382304	0.8269	0.8637	0.0368	NA	5	87.09	88.25	1.16	NA
1714	KCNK1	138.981	155.027	0.1641	0.773857	NC	No	No	1	KCNK1_exon_chr1:233671270	1	1	0	NA	5	23.84	28	4.16	NA
1715	SLC35F3	99.5209	82.6412	-0.2464	0.734952	NC	No	No	2	SLC35F3_exon_chr1:234309100	0.4798	0.5904	0.1106	NA	1
1716	SLC35F3									SLC35F3_exon_chr1:234323007	0.5202	0.4096	-0.1106	NA	1
1717	COA6-AS1	16.9686	18.4775	0.0868	1	NC	No	No	1	COA6-AS1_exon_chr1:234373210	1	1	0	NA	2	23.47	39.78	16.31	NA
1718	COA6	391.524	376.998	-0.0533	0.778553	NC	No	No	1	COA6_exon_chr1:234383722	1	1	0	NA	1
1719	TARBP1	5.0459	8.2386	0.74	1	NC	No	No	1	TARBP1_exon_chr1:234391745	1	1	0	NA	2	69.52	90.53	21	NA
1720	IRF2BP2	83.4862	78.0022	-0.1076	1	NC	No	No	1	IRF2BP2_exon_chr1:234607852	1	1	0	NA	9	48.35	44.98	-3.37	NA
1721	TOMM20	1393.66	1211.89	-0.2013	0.0652378	NC	No	No	1	TOMM20_exon_chr1:235112108	1	1	0	NA	9	74.64	69.44	-5.2	NA
1722	ARID4B	1100.53	1110.19	0.0137	0.868284	NC	No	No	6	ARID4B_exon_chr1:235131997	0.2492	0.2767	0.0275	NA	1
1723	ARID4B									ARID4B_exon_chr1:235168652	0.05	0.0514	0.0014	NA	5	87.85	89.38	1.53	NA
1724	ARID4B									ARID4B_exon_chr1:235177913	0.1567	0.1333	-0.0234	NA	3	67.26	69.92	2.65	NA
1725	ARID4B									ARID4B_exon_chr1:235182793	0.0959	0.0979	0.0019	NA	5	19.39	18.62	-0.76	NA
1726	ARID4B									ARID4B_exon_chr1:235214026	0.2364	0.2243	-0.0122	NA	3	51.38	51.88	0.5	NA
1727	ARID4B									ARID4B_exon_chr1:235229385	0.0987	0.1004	0.0017	NA	3	7.36	6.37	-0.99	NA
1728	RBM34	157.452	146.738	-0.0866	1	NC	No	No	2	RBM34_exon_chr1:235155112	0.8656	0.8515	-0.014	NA	3	93.6	96.7	3.1	NA
1729	RBM34									RBM34_exon_chr1:235161171	0.1344	0.1485	0.014	NA	4	60.3	43.73	-16.57	NA
1730	GGPS1	72.9392	77.6737	0.0938	1	NC	No	No	1	GGPS1_exon_chr1:235342010	1	1	0	NA	6	42.97	40.17	-2.8	NA
1731	B3GALNT2	74.5227	59.4052	-0.3268	0.988714	NC	No	No	1	B3GALNT2_exon_chr1:235450340	1	1	0	NA	5	91.94	93.06	1.12	NA
1732	TBCE	124.827	149.476	0.2606	0.418032	NC	No	No	1	TBCE_exon_chr1:235448348	1	1	0	NA	2	92.42	91.38	-1.04	NA
1733	GNG4	44.5421	31.3753	-0.5011	0.832551	NC	No	No	1	GNG4_exon_chr1:235552237	1	1	0	NA	1
1734	LYST	10.1927	13.4048	0.3568	1	NC	No	No	2	LYST_exon_chr1:235663078	0.598	0.2118	-0.3862	NA	1
1735	LYST									LYST_exon_chr1:235829036	0.402	0.7619	0.36	NA	2	100	92.18	-7.82	NA
1736	GPR137B	23.6627	36.213	0.6244	1	NC	No	No	1	GPR137B_exon_chr1:236208049	1	1	0	NA	4	50.87	56.3	5.43	NA
1737	ERO1B	15.7762	19.6921	0.2959	1	NC	No	No	1	ERO1B_exon_chr1:236218576	1	1	0	NA	7	85.42	58.62	-26.79	NA
1738	AL359921.2	23.2812	23.9594	0.0648	1	NC	No	No	1	AL359921.2_exon_chr1:236536704	1	1	0	NA	1
1739	AL359921.1	210.086	195.597	-0.0945	0.961169	NC	No	No	1	AL359921.1_exon_chr1:236550990	1	1	0	NA	1
1740	LGALS8	92.0273	84.233	-0.149	1	NC	No	No	1	LGALS8_exon_chr1:236548011	1	1	0	NA	7	49.23	43.89	-5.34	NA
1741	HEATR1	36.0608	29.4046	-0.274	1	NC	No	No	3	HEATR1_exon_chr1:236558529	0.1458	0.0969	-0.0489	NA	1
1742	HEATR1									HEATR1_exon_chr1:236572828	0.6106	0.5596	-0.0511	NA	1
1743	HEATR1									HEATR1_exon_chr1:236596044	0.2316	0.3196	0.088	NA	1
1744	MTR	65.384	71.0671	0.1428	1	NC	No	No	1	MTR_exon_chr1:236897557	1	1	0	NA	6	36.63	38.17	1.54	NA
1745	FH	706.799	755.062	0.1013	0.492768	NC	No	No	1	FH_exon_chr1:241497970	1	1	0	NA	2	26.17	23.73	-2.44	NA
1746	CHML	62.5343	77.2327	0.286	0.847365	NC	No	No	1	CHML_exon_chr1:241636073	1	1	0	NA	4	73.1	71.33	-1.78	NA
1747	EXO1	90.4694	87.8932	-0.018	1	NC	No	No	1	EXO1_exon_chr1:241889464	1	1	0	NA	6	20.68	18.4	-2.27	NA
1748	CEP170	95.9903	99.0347	0.0469	1	NC	No	No	3	CEP170_exon_chr1:243126738	0.4358	0.4766	0.0408	NA	3	92.85	90.97	-1.88	NA
1749	CEP170									CEP170_exon_chr1:243166116	0.0812	0.0204	-0.0608	NA	1
1750	CEP170									CEP170_exon_chr1:KI270763v1	0.4273	0.4611	0.0337	NA	4	92.6	91.85	-0.74	NA
1751	SDCCAG8	301.247	301.972	0.0081	1	NC	No	No	2	SDCCAG8_exon_chr1:243499755	0.4322	0.4408	0.0086	NA	1
1752	SDCCAG8									SDCCAG8_exon_chr1:KI270763v1	0.4876	0.488	0.0004	NA	7	93.48	94.08	0.61	NA
1753	ZBTB18	19.0939	29.7994	0.6467	1	NC	No	No	1	ZBTB18_exon_chr1:244053787	1	1	0	NA	1
1754	ADSS	244.975	256.779	0.0652	1	NC	No	No	2	ADSS_exon_chr1:244409638	0.9381	0.957	0.0189	NA	4	73.12	73.91	0.79	NA
1755	ADSS									ADSS_exon_chr1:244436893	0.0619	0.043	-0.0189	NA	1
1756	DESI2	271.784	298.973	0.1288	0.703961	NC	No	No	1	DESI2_exon_chr1:244705555	1	1	0	NA	1
1757	HNRNPU	1581.51	1635.97	0.0493	0.657811	NC	No	No	3	HNRNPU_exon_chr1:244856625	0.7278	0.7154	-0.0124	NA	17	65.89	64.99	-0.89	NA
1758	HNRNPU									HNRNPU_exon_chr1:244863106	0.1226	0.1168	-0.0058	NA	1
1759	HNRNPU									HNRNPU_exon_chr1:244864560	0.1247	0.1488	0.0242	NA	3	90.24	93.3	3.07	NA
1760	COX20	1628.14	1477.13	-0.1408	0.194786	NC	No	No	1	COX20_exon_chr1:244843040	1	1	0	NA	10	15.41	15.35	-0.05	NA
1761	EFCAB2	43.1373	34.1597	-0.338	1	NC	No	No	2	EFCAB2_exon_chr1:245087244	0.8075	0.9305	0.123	NA	5	86.88	86.47	-0.41	NA
1762	EFCAB2									EFCAB2_exon_chr1:245121919	0.1343	0.055	-0.0793	NA	2	16.41	44.5	28.09	NA
1763	SMYD3	172.607	117.073	-0.5541	0.00896615	DOWN	No	No	1	SMYD3_exon_chr1:245749664	1	1	0	NA	1
1764	TFB2M	77.4732	68.0583	-0.1906	1	NC	No	No	1	TFB2M_exon_chr1:246541202	1	1	0	NA	2	91	92	1	NA
1765	CNST	19.8007	19.6628	-0.0431	1	NC	No	No	1	CNST_exon_chr1:246665699	1	1	0	NA	3	64.92	74.51	9.59	NA
1766	AHCTF1	398.437	415.405	0.0653	0.732116	NC	No	No	3	AHCTF1_exon_chr1:246840998	0.408	0.4612	0.0532	NA	8	32.51	27.31	-5.2	NA
1767	AHCTF1									AHCTF1_exon_chr1:246842776	0.3457	0.2973	-0.0483	NA	1
1768	AHCTF1									AHCTF1_exon_chr1:246851442	0.2463	0.2415	-0.0048	NA	5	78.22	70.58	-7.64	NA
1769	ZNF670-ZNF695	12.4254	15.6999	0.3255	1	NC	No	No	2	ZNF670-ZNF695_exon_chr1:246945827	0.274	0.356	0.082	NA	2	83.7	61.6	-22.1	NA
1770	ZNF670-ZNF695									ZNF670-ZNF695_exon_chr1:246969678	0.726	0.644	-0.082	NA	1
1771	ZNF695	8.2201	8.8955	0.1468	1	NC	No	No	1	ZNF695_exon_chr1:246988255	1	1	0	NA	5	65.77	78.97	13.19	NA
1772	ZNF670	32.4556	24.7835	-0.3999	1	NC	No	No	1	ZNF670_exon_chr1:247038427	1	1	0	NA	3	29.47	21.89	-7.59	NA
1773	ZNF669	24.5717	21.6531	-0.1861	1	NC	No	No	1	ZNF669_exon_chr1:247101319	1	1	0	NA	4	43.84	47.46	3.62	NA
1774	ZNF124	8.2432	10.3061	0.3119	1	NC	No	No	2	ZNF124_exon_chr1:247123871	0.2499	0.323	0.0732	NA	1
1775	ZNF124									ZNF124_exon_chr1:247157403	0.7501	0.677	-0.0732	NA	2	94.75	89.07	-5.69	NA
1776	AL390728.6	14.1	13.5525	-0.0493	1	NC	No	No	1	AL390728.6_exon_chr1:247188526	1	1	0	NA	5	78.81	83.36	4.54	NA
1777	ZNF496	107.841	89.4991	-0.2793	0.617321	NC	No	No	1	ZNF496_exon_chr1:247301276	1	1	0	NA	5	72.02	70.93	-1.09	NA
1778	SH3BP5L	263.232	256.501	-0.0414	1	NC	No	No	1	SH3BP5L_exon_chr1:248812370	1	1	0	NA	1
1779	ZNF672	225.796	199.496	-0.1691	0.606516	NC	No	No	1	ZNF672_exon_chr1:248847051	1	1	0	NA	1
1780	ZNF692	304.501	302.44	-0.0113	1	NC	No	No	1	ZNF692_exon_chr1:248850516	1	1	0	NA	1
1781	PGBD2	8.2457	12.501	0.5644	1	NC	No	No	1	PGBD2_exon_chr1:248916601	1	1	0	NA	4	88.93	68.88	-20.05	NA
1782	RPL23AP25	46.4931	51.2452	0.1456	1	NC	No	No	1	RPL23AP25_exon_chr1:248936580	1	1	0	NA	1
1783	ZMYND11	107.913	79.3224	-0.4356	0.265336	NC	No	No	2	ZMYND11_exon_chr10:209888	0.0884	0.0805	-0.0079	NA	1
1784	ZMYND11									ZMYND11_exon_chr10:252347	0.8919	0.9153	0.0234	NA	5	91.36	90.96	-0.39	NA
1785	DIP2C	37.4281	33.6941	-0.1252	1	NC	No	No	1	DIP2C_exon_chr10:277577	1	1	0	NA	4	71.3	81.82	10.52	NA
1786	LARP4B	235.733	259.72	0.1422	0.660145	NC	No	No	1	LARP4B_exon_chr10:813213	1	1	0	NA	8	54.96	54.18	-0.78	NA
1787	GTPBP4	607.009	602.227	-0.0082	0.889209	NC	No	No	3	GTPBP4_exon_chr10:1010419	0.2056	0.198	-0.0076	NA	1
1788	GTPBP4									GTPBP4_exon_chr10:1012399	0.3111	0.2907	-0.0204	NA	3	51.75	46.52	-5.23	NA
1789	GTPBP4									GTPBP4_exon_chr10:1017074	0.4567	0.4925	0.0358	NA	10	35.04	29.07	-5.97	NA
1790	IDI1	361.998	446.505	0.3052	0.0916995	NC	No	No	2	IDI1_exon_chr10:1041504	0.8922	0.9517	0.0594	NA	9	89.94	91.09	1.15	NA
1791	IDI1									IDI1_exon_chr10:1042762	0.1078	0.0483	-0.0594	NA	1
1792	IDI2-AS1	6.6949	11.3236	0.7769	1	NC	No	No	1	IDI2-AS1_exon_chr10:1043528	1	1	0	NA	1
1793	WDR37	18.1874	18.0991	-0.0032	1	NC	No	No	1	WDR37_exon_chr10:1129212	1	1	0	NA	4	86.78	79.2	-7.58	NA
1794	PFKP	758.823	748.073	-0.0198	0.814182	NC	No	No	1	PFKP_exon_chr10:3136449	1	1	0	NA	1
1795	PITRM1	171.776	185.564	0.1056	0.882013	NC	No	No	1	PITRM1_exon_chr10:3138124	1	1	0	NA	1
1796	KLF6	61.9538	57.3669	-0.0921	1	NC	No	No	1	KLF6_exon_chr10:3779590	1	1	0	NA	1
1797	AKR1C3	5.4019	8.7037	0.6501	1	NC	No	No	1	AKR1C3_exon_chr10:5107460	1	1	0	NA	1
1798	NET1	313.505	362.203	0.2152	0.235694	NC	No	No	1	NET1_exon_chr10:5456086	1	1	0	NA	1
1799	ASB13	110.988	71.6287	-0.6339	0.0240339	DOWN	No	No	1	ASB13_exon_chr10:5640830	1	1	0	NA	3	93.55	89.77	-3.78	NA
1800	TASOR2	256.342	271.7	0.0799	0.913338	NC	No	No	3	TASOR2_exon_chr10:5712822	0.0483	0.0604	0.0121	NA	1
1801	TASOR2									TASOR2_exon_chr10:5730486	0.0922	0.0737	-0.0184	NA	1
1802	TASOR2									TASOR2_exon_chr10:5762531	0.8273	0.8341	0.0068	NA	1
1803	GDI2	890.667	771.095	-0.2074	0.0592935	NC	No	No	1	GDI2_exon_chr10:5766152	1	1	0	NA	1
1804	AL596094.1	7.3291	6.1848	-0.2424	1	NC	No	No	1	AL596094.1_exon_chr10:5814226	1	1	0	NA	1
1805	ANKRD16	82.7505	64.9225	-0.3338	0.670329	NC	No	No	2	ANKRD16_exon_chr10:5862691	0.0646	0.1045	0.0399	NA	1
1806	ANKRD16									ANKRD16_exon_chr10:5878287	0.9354	0.8955	-0.0399	NA	1
1807	FBH1	22.2656	17.6959	-0.3315	1	NC	No	No	1	FBH1_exon_chr10:5937109	1	1	0	NA	1
1808	IL15RA	12.8564	8.6016	-0.5262	1	NC	No	No	3	IL15RA_exon_chr10:5949240	0.1617	0.135	-0.0267	NA	1
1809	IL15RA									IL15RA_exon_chr10:5953326	0.7411	0.865	0.1239	NA	1
1810	IL15RA									IL15RA_exon_chr10:5958351	0.0972	0	-0.0972	NA	1
1811	RBM17	1132.7	1177.69	0.0583	0.693443	NC	No	No	2	RBM17_exon_chr10:6104930	0.6782	0.6371	-0.0411	NA	1
1812	RBM17									RBM17_exon_chr10:6113906	0.3218	0.3629	0.0411	NA	5	22.25	18.1	-4.15	NA
1813	PFKFB3	94.2756	93.4472	-0.019	1	NC	No	No	1	PFKFB3_exon_chr10:6232894	1	1	0	NA	1
1814	PRKCQ-AS1	24.3456	23.0721	-0.0854	1	NC	No	No	1	PRKCQ-AS1_exon_chr10:6583675	1	1	0	NA	2	6.87	6.18	-0.69	NA
1815	AL392086.2	16.9959	11.9653	-0.5438	1	NC	No	No	1	AL392086.2_exon_chr10:6737275	1	1	0	NA	1
1816	KIN	84.3721	113.085	0.4237	0.220416	NC	No	No	3	KIN_exon_chr10:7756142	0.2875	0.3145	0.0271	NA	3	17.7	10.63	-7.07	NA
1817	KIN									KIN_exon_chr10:7769345	0.4969	0.4917	-0.0052	NA	1
1818	KIN									KIN_exon_chr10:7779019	0.2156	0.1938	-0.0219	NA	2	39.95	32.97	-6.98	NA
1819	ATP5F1C	978.104	1073.73	0.1381	0.265758	NC	No	No	1	ATP5F1C_exon_chr10:7807658	1	1	0	NA	1
1820	TAF3	563.725	570.71	0.0189	0.862016	NC	No	No	2	TAF3_exon_chr10:7963919	0.8996	0.8788	-0.0208	NA	6	67.36	67.45	0.1	NA
1821	TAF3									TAF3_exon_chr10:8014636	0.1004	0.1212	0.0208	NA	3	91.12	84.29	-6.82	NA
1822	USP6NL	89.8378	91.3728	0.0277	1	NC	No	No	2	USP6NL_exon_chr10:11463849	0.8631	0.8728	0.0097	NA	16	77.43	83.34	5.91	NA
1823	USP6NL									USP6NL_exon_chr10:11565638	0.1369	0.1272	-0.0097	NA	2	40.02	36	-4.03	NA
1824	ECHDC3	50.1684	52.7153	0.0686	1	NC	No	No	1	ECHDC3_exon_chr10:11763223	1	1	0	NA	1
1825	PROSER2	66.7035	79.9677	0.2612	0.802935	NC	No	No	1	PROSER2_exon_chr10:11869489	1	1	0	NA	2	49.37	51.38	2.01	NA
1826	UPF2	828.49	765.92	-0.1115	0.48647	NC	No	No	2	UPF2_exon_chr10:11921307	0.0526	0.056	0.0034	NA	4	90.69	92.52	1.83	NA
1827	UPF2									UPF2_exon_chr10:12035897	0.9383	0.9345	-0.0038	NA	4	63.99	65.55	1.56	NA
1828	DHTKD1	61.8019	49.4771	-0.3031	1	NC	No	No	1	DHTKD1_exon_chr10:12120786	1	1	0	NA	5	48.8	52.83	4.04	NA
1829	SEC61A2	63.7069	58.2363	-0.1238	1	NC	No	No	2	SEC61A2_exon_chr10:12164267	0.9028	0.9079	0.0051	NA	3	85.39	78.66	-6.74	NA
1830	SEC61A2									SEC61A2_exon_chr10:12169257	0.0972	0.0921	-0.0051	NA	1
1831	NUDT5	611.561	651.394	0.0931	0.562096	NC	No	No	1	NUDT5_exon_chr10:12167811	1	1	0	NA	8	13.32	13.2	-0.12	NA
1832	CDC123	1168.35	1309.08	0.1653	0.124889	NC	No	No	1	CDC123_exon_chr10:12249580	1	1	0	NA	1
1833	CAMK1D	21.3847	15.0555	-0.5411	1	NC	No	No	1	CAMK1D_exon_chr10:12828768	1	1	0	NA	3	96	80.01	-15.99	NA
1834	CCDC3	76.2884	80.2712	0.0748	1	NC	No	No	1	CCDC3_exon_chr10:12898679	1	1	0	NA	2	95.31	92.91	-2.4	NA
1835	OPTN	118.422	135.53	0.1824	0.736991	NC	No	No	4	OPTN_exon_chr10:13110179	0.0974	0.0508	-0.0466	NA	1
1836	OPTN									OPTN_exon_chr10:13122384	0.1322	0.1756	0.0434	NA	2	81.81	76.02	-5.79	NA
1837	OPTN									OPTN_exon_chr10:13125945	0.1121	0.1951	0.083	NA	1
1838	OPTN									OPTN_exon_chr10:13136744	0.5955	0.4951	-0.1003	NA	2	37.51	22.81	-14.71	NA
1839	MCM10	232.768	241.296	0.0521	1	NC	No	No	3	MCM10_exon_chr10:13197622	0.0928	0.0559	-0.0369	NA	1
1840	MCM10									MCM10_exon_chr10:13201420	0.2283	0.2012	-0.0271	NA	1
1841	MCM10									MCM10_exon_chr10:13209090	0.6772	0.7429	0.0658	NA	8	68.34	68.61	0.27	NA
1842	RNU6-6P	53.3505	87.1828	0.7149	0.0654892	NC	No	No	1	RNU6-6P_exon_chr10:13217268	1	1	0	NA	1
1843	PHYH	50.8257	37.6638	-0.4431	0.796208	NC	No	No	1	PHYH_exon_chr10:13278354	1	1	0	NA	2	42.84	31.56	-11.28	NA
1844	SEPHS1	380.564	361.065	-0.0756	0.673367	NC	No	No	1	SEPHS1_exon_chr10:13319356	1	1	0	NA	8	49.04	44.12	-4.92	NA
1845	BEND7	22.95	18.9661	-0.2756	1	NC	No	No	3	BEND7_exon_chr10:13447319	0.7125	0.6723	-0.0402	NA	2	91.06	98.21	7.15	NA
1846	BEND7									BEND7_exon_chr10:13481124	0.1789	0.2111	0.0322	NA	1
1847	BEND7									BEND7_exon_chr10:13500080	0.1086	0.1165	0.008	NA	1
1848	PRPF18	31.2708	24.2855	-0.3455	1	NC	No	No	2	PRPF18_exon_chr10:13586938	0.788	0.7758	-0.0122	NA	1
1849	PRPF18									PRPF18_exon_chr10:13597457	0.212	0.2242	0.0122	NA	1
1850	AL157392.5	105.605	93.6712	-0.1713	0.875292	NC	No	No	1	AL157392.5_exon_chr10:13630259	1	1	0	NA	4	36.18	47.22	11.04	NA
1851	AL157392.3	29.7277	42.3027	0.4994	1	NC	No	No	2	AL157392.3_exon_chr10:13637854	0.0833	0.0519	-0.0315	NA	2	67.83	66.67	-1.16	NA
1852	AL157392.3									AL157392.3_exon_chr10:13653824	0.8329	0.9365	0.1036	NA	1
1853	FAM107B	88.9169	128.013	0.5379	0.088464	NC	No	No	3	FAM107B_exon_chr10:14521306	0.7726	0.8176	0.045	NA	3	65.18	63.83	-1.36	NA
1854	FAM107B									FAM107B_exon_chr10:14522225	0.1249	0.1009	-0.0241	NA	1
1855	FAM107B									FAM107B_exon_chr10:14602850	0.1025	0.0816	-0.0209	NA	2	67.52	66.15	-1.37	NA
1856	HSPA14	213.092	258.662	0.2742	0.240105	NC	No	No	4	HSPA14_exon_chr10:14843370	0.2023	0.2151	0.0127	NA	3	54.21	64.29	10.08	NA
1857	HSPA14									HSPA14_exon_chr10:14849432	0.1279	0.083	-0.0448	NA	1
1858	HSPA14									HSPA14_exon_chr10:14870596	0.1878	0.2529	0.0651	NA	1
1859	HSPA14									HSPA14_exon_chr10:14871527	0.457	0.4399	-0.0171	NA	1
1860	AC069544.1	5.3746	6.7963	0.3877	1	NC	No	No	1	AC069544.1_exon_chr10:14878686	1	1	0	NA	1
1861	SUV39H2	62.4847	65.2524	0.0566	1	NC	No	No	2	SUV39H2_exon_chr10:14896845	0.0732	0.062	-0.0112	NA	2	64.87	39.46	-25.4	NA
1862	SUV39H2									SUV39H2_exon_chr10:14902405	0.9268	0.938	0.0112	NA	1
1863	DCLRE1C	90.7641	97.0965	0.1077	1	NC	No	No	1	DCLRE1C_exon_chr10:14909330	1	1	0	NA	5	11.76	13.85	2.08	NA
1864	ACBD7	55.1136	43.1848	-0.3448	1	NC	No	No	1	ACBD7_exon_chr10:15078603	1	1	0	NA	1
1865	NMT2	194.758	238.944	0.2893	0.254928	NC	No	No	2	NMT2_exon_chr10:15109215	0.5989	0.575	-0.0239	NA	11	32.21	32.12	-0.09	NA
1866	NMT2									NMT2_exon_chr10:15141557	0.3799	0.4147	0.0348	NA	1
1867	RPP38	269.434	238.397	-0.1694	0.533966	NC	No	No	1	RPP38_exon_chr10:15103304	1	1	0	NA	4	66.84	68.5	1.67	NA
1868	FAM171A1	169.015	154.085	-0.1351	0.882767	NC	No	No	1	FAM171A1_exon_chr10:15214601	1	1	0	NA	1
1869	MINDY3	47.3775	46.6686	-0.022	1	NC	No	No	1	MINDY3_exon_chr10:15779141	1	1	0	NA	4	65.1	65.64	0.54	NA
1870	PTER	68.9132	70.7067	0.0356	1	NC	No	No	1	PTER_exon_chr10:16511045	1	1	0	NA	11	69.44	63.99	-5.46	NA
1871	RSU1	101.906	82.5266	-0.3018	0.594203	NC	No	No	1	RSU1_exon_chr10:16593496	1	1	0	NA	7	14.63	17.65	3.02	NA
1872	AC067747.1	27.4659	40.8756	0.5922	0.707003	NC	No	No	1	AC067747.1_exon_chr10:17149140	1	1	0	NA	5	41.66	43.19	1.54	NA
1873	VIM	46.5359	22.0365	-1.0807	0.411696	NC	No	No	1	VIM_exon_chr10:17237229	1	1	0	NA	2	71.38	60.92	-10.46	NA
1874	HACD1	128.591	108.158	-0.2479	0.60156	NC	No	No	3	HACD1_exon_chr10:17590446	0.6101	0.7288	0.1187	NA	1
1875	HACD1									HACD1_exon_chr10:17599411	0.345	0.2072	-0.1378	NA	1
1876	HACD1									HACD1_exon_chr10:17615964	0.045	0.0641	0.0191	NA	1
1877	STAM	72.4587	82.7657	0.1827	0.916394	NC	No	No	1	STAM_exon_chr10:17714542	1	1	0	NA	8	57.21	60.77	3.56	NA
1878	AL450384.2	29.4188	31.0362	0.06	1	NC	No	No	1	AL450384.2_exon_chr10:18546145	1	1	0	NA	3	87.29	84.91	-2.37	NA
1879	ARL5B	90.4601	144.722	0.6773	0.00473252	UP	No	No	1	ARL5B_exon_chr10:18675167	1	1	0	NA	1
1880	NEBL	62.6775	63.8397	0.0252	1	NC	No	No	3	NEBL_exon_chr10:20785923	0.7808	0.7924	0.0116	NA	5	68.27	60.48	-7.79	NA
1881	NEBL									NEBL_exon_chr10:20814043	0.0993	0.1298	0.0304	NA	1
1882	NEBL									NEBL_exon_chr10:20840849	0.0939	0.0494	-0.0445	NA	1
1883	MIR1915HG	59.4034	50.5168	-0.2264	1	NC	No	No	1	MIR1915HG_exon_chr10:21495945	1	1	0	NA	4	33.63	34.53	0.9	NA
1884	SKIDA1	13.3386	16.197	0.2874	1	NC	No	No	1	SKIDA1_exon_chr10:21519658	1	1	0	NA	1
1885	MLLT10	83.7098	85.7724	0.0304	1	NC	No	No	3	MLLT10_exon_chr10:21556642	0.0441	0.0626	0.0184	NA	1
1886	MLLT10									MLLT10_exon_chr10:21617111	0.1912	0.1722	-0.019	NA	1
1887	MLLT10									MLLT10_exon_chr10:21741938	0.6656	0.7101	0.0445	NA	1
1888	DNAJC1	389.363	384.175	-0.0154	0.887259	NC	No	No	3	DNAJC1_exon_chr10:21756755	0.1466	0.1502	0.0035	NA	1
1889	DNAJC1									DNAJC1_exon_chr10:21904612	0.387	0.3834	-0.0036	NA	1
1890	DNAJC1									DNAJC1_exon_chr10:21919929	0.4663	0.4652	-0.0012	NA	2	39.06	39.9	0.85	NA
1891	COMMD3-BMI1	74.9434	79.7566	0.0735	1	NC	No	No	1	COMMD3-BMI1_exon_chr10:22317856	1	1	0	NA	1
1892	BMI1	275.504	319.957	0.2134	0.326812	NC	No	No	1	BMI1_exon_chr10:22329047	1	1	0	NA	10	32.41	33.58	1.18	NA
1893	PIP4K2A	150.101	134.807	-0.1519	0.853451	NC	No	No	1	PIP4K2A_exon_chr10:22537281	1	1	0	NA	7	86.15	83.95	-2.2	NA
1894	MSRB2	56.9657	52.0318	-0.1223	1	NC	No	No	1	MSRB2_exon_chr10:23120757	1	1	0	NA	2	13.99	19.69	5.7	NA
1895	OTUD1	36.2161	30.9131	-0.2025	1	NC	No	No	1	OTUD1_exon_chr10:23439457	1	1	0	NA	2	15.51	20.24	4.73	NA
1896	KIAA1217	15.2915	26.1193	0.7765	1	NC	No	No	4	KIAA1217_exon_chr10:24527935	0.1053	0.1005	-0.0048	NA	1
1897	KIAA1217									KIAA1217_exon_chr10:24533069	0.0829	0.069	-0.0139	NA	5	70.78	67.02	-3.76	NA
1898	KIAA1217									KIAA1217_exon_chr10:24542882	0.0263	0.0957	0.0694	NA	1
1899	KIAA1217									KIAA1217_exon_chr10:24544980	0.7855	0.7348	-0.0507	NA	1
1900	ARHGAP21	337.209	334.741	-0.0083	0.889763	NC	No	No	2	ARHGAP21_exon_chr10:24586106	0.9081	0.923	0.0149	NA	5	24.8	24.82	0.02	NA
1901	ARHGAP21									ARHGAP21_exon_chr10:24722279	0.0919	0.077	-0.0149	NA	1
1902	THNSL1	25.1812	19.3481	-0.3236	1	NC	No	No	1	THNSL1_exon_chr10:25023175	1	1	0	NA	2	10.31	14.98	4.67	NA
1903	GPR158	9.5602	9.0474	-0.1296	1	NC	No	No	1	GPR158_exon_chr10:25597771	1	1	0	NA	1
1904	ABI1	97.4351	110.538	0.1942	0.81954	NC	No	No	1	ABI1_exon_chr10:26748745	1	1	0	NA	10	33.36	31.28	-2.08	NA
1905	PDSS1	116.734	117.201	0.0106	1	NC	No	No	1	PDSS1_exon_chr10:26746332	1	1	0	NA	1
1906	FAM238C	14.8869	21.0224	0.464	1	NC	No	No	1	FAM238C_exon_chr10:26931562	1	1	0	NA	1
1907	ANKRD26	334.782	302.631	-0.1456	0.443282	NC	No	No	5	ANKRD26_exon_chr10:27024559	0.0556	0.052	-0.0036	NA	1
1908	ANKRD26									ANKRD26_exon_chr10:27035752	0.5453	0.4983	-0.047	NA	1
1909	ANKRD26									ANKRD26_exon_chr10:27038054	0.1918	0.2112	0.0193	NA	2	54.54	56.45	1.91	NA
1910	ANKRD26									ANKRD26_exon_chr10:27040178	0.0666	0.0922	0.0256	NA	2	37	30.76	-6.24	NA
1911	ANKRD26									ANKRD26_exon_chr10:27048979	0.0676	0.055	-0.0126	NA	2	9.29	19.88	10.59	NA
1912	YME1L1	1029.22	1139.29	0.1481	0.248323	NC	No	No	1	YME1L1_exon_chr10:27112120	1	1	0	NA	11	28.18	29.48	1.3	NA
1913	MASTL	39.7096	42.3167	0.109	1	NC	No	No	1	MASTL_exon_chr10:27186378	1	1	0	NA	2	37.19	32.22	-4.96	NA
1914	ACBD5	59.9515	59.7284	-0.0048	1	NC	No	No	2	ACBD5_exon_chr10:27197442	0.8962	0.8905	-0.0058	NA	4	76.2	80.11	3.9	NA
1915	ACBD5									ACBD5_exon_chr10:27231820	0.1038	0.0815	-0.0222	NA	1
1916	RAB18	277.817	320.926	0.2048	0.408002	NC	No	No	1	RAB18_exon_chr10:27537875	1	1	0	NA	13	43.67	43.78	0.11	NA
1917	MKX	41.4438	20.5255	-0.9801	0.657005	NC	No	No	1	MKX_exon_chr10:27675415	1	1	0	NA	4	75.34	80.14	4.81	NA
1918	ARMC4	25.2118	21.0375	-0.2612	1	NC	No	No	1	ARMC4_exon_chr10:27812625	1	1	0	NA	2	86.09	95.23	9.14	NA
1919	MPP7	163.648	128.337	-0.3582	0.176161	NC	No	No	1	MPP7_exon_chr10:28054244	1	1	0	NA	6	86.81	85.5	-1.31	NA
1920	WAC-AS1	334.635	314.967	-0.0825	0.710159	NC	No	No	1	WAC-AS1_exon_chr10:28524611	1	1	0	NA	1
1921	WAC	1129.03	1239.21	0.1354	0.280823	NC	No	No	1	WAC_exon_chr10:28619536	1	1	0	NA	3	31.98	33.83	1.84	NA
1922	BAMBI	18.0347	25.1327	0.48	1	NC	No	No	1	BAMBI_exon_chr10:28681257	1	1	0	NA	3	54.85	57.67	2.82	NA
1923	RPL21P93	3051.45	3163.14	0.0506	0.61281	NC	No	No	1	RPL21P93_exon_chr10:28899484	1	1	0	NA	1
1924	SVIL-AS1	41.448	39.3218	-0.0813	1	NC	No	No	3	SVIL-AS1_exon_chr10:29420490	0.7355	0.7449	0.0094	NA	5	18.88	21.46	2.58	NA
1925	SVIL-AS1									SVIL-AS1_exon_chr10:29468919	0.1238	0.1524	0.0286	NA	1
1926	SVIL-AS1									SVIL-AS1_exon_chr10:29482832	0.1407	0.1028	-0.038	NA	1
1927	SVIL	74.765	77.9555	0.0688	1	NC	No	No	2	SVIL_exon_chr10:29458333	0.689	0.6677	-0.0213	NA	2	75.89	69.39	-6.49	NA
1928	SVIL									SVIL_exon_chr10:29555108	0.311	0.3323	0.0213	NA	1
1929	JCAD	127.244	159.084	0.3258	0.240105	NC	No	No	1	JCAD_exon_chr10:30017917	1	1	0	NA	9	83.6	75.29	-8.31	NA
1930	AL353796.1	10.2728	7.9294	-0.3312	1	NC	No	No	1	AL353796.1_exon_chr10:30306066	1	1	0	NA	2	31.83	60.22	28.39	NA
1931	MTPAP	130.34	125.102	-0.0594	1	NC	No	No	2	MTPAP_exon_chr10:30313971	0.8795	0.8894	0.0099	NA	5	34.52	26.21	-8.31	NA
1932	MTPAP									MTPAP_exon_chr10:30340450	0.1205	0.1106	-0.0099	NA	1
1933	MAP3K8	6.1632	7.3565	0.2057	1	NC	No	No	2	MAP3K8_exon_chr10:30438821	0.8646	0.8875	0.0228	NA	1
1934	MAP3K8									MAP3K8_exon_chr10:30460705	0.1354	0.1125	-0.0228	NA	2	35.42	6.25	-29.17	NA
1935	ZNF438	12.8078	13.8822	0.1008	1	NC	No	No	1	ZNF438_exon_chr10:30845573	1	1	0	NA	1
1936	ZEB1-AS1	8.5189	6.28	-0.4367	1	NC	No	No	1	ZEB1-AS1_exon_chr10:31319092	1	1	0	NA	1
1937	ZEB1	70.8969	65.4158	-0.124	1	NC	No	No	1	ZEB1_exon_chr10:31526671	1	1	0	NA	5	12.94	7.58	-5.36	NA
1938	ARHGAP12	281.966	283.123	0.0026	1	NC	No	No	1	ARHGAP12_exon_chr10:31807832	1	1	0	NA	6	16.46	12.47	-3.99	NA
1939	KIF5B	1353.23	1463.1	0.1137	0.630435	NC	No	No	2	KIF5B_exon_chr10:32011516	0.6996	0.733	0.0334	NA	14	76.61	77.79	1.18	NA
1940	KIF5B									KIF5B_exon_chr10:32023036	0.2403	0.2132	-0.0272	NA	1
1941	EPC1	65.8414	62.8503	-0.0613	1	NC	No	No	4	EPC1_exon_chr10:32269135	0.5863	0.5441	-0.0423	NA	2	90.53	86.35	-4.18	NA
1942	EPC1									EPC1_exon_chr10:32293194	0.1686	0.1594	-0.0092	NA	1
1943	EPC1									EPC1_exon_chr10:32293737	0.0805	0.0662	-0.0143	NA	1
1944	EPC1									EPC1_exon_chr10:32345623	0.1585	0.225	0.0666	NA	2	75.28	87.18	11.9	NA
1945	AL365203.2	8.3191	12.4512	0.5482	1	NC	No	No	1	AL365203.2_exon_chr10:32889311	1	1	0	NA	1
1946	ITGB1	935.611	978.572	0.0669	0.646224	NC	No	No	2	ITGB1_exon_chr10:32901635	0.5957	0.6196	0.0239	NA	5	28.89	28.74	-0.15	NA
1947	ITGB1									ITGB1_exon_chr10:32930044	0.4043	0.3794	-0.0248	NA	1
1948	NRP1	13.6195	9.4849	-0.4576	1	NC	No	No	2	NRP1_exon_chr10:33180365	0.5824	0.6855	0.1031	NA	2	89.85	94.47	4.61	NA
1949	NRP1									NRP1_exon_chr10:33197709	0.3881	0.2959	-0.0921	NA	1
1950	PARD3	242.292	230.224	-0.0711	0.92409	NC	No	No	4	PARD3_exon_chr10:34111562	0.2237	0.1678	-0.0559	NA	3	25.88	17.34	-8.54	NA
1951	PARD3									PARD3_exon_chr10:34284245	0.0649	0.0497	-0.0151	NA	1
1952	PARD3									PARD3_exon_chr10:34312382	0.3003	0.3818	0.0816	NA	1
1953	PARD3									PARD3_exon_chr10:34317338	0.4061	0.3992	-0.0069	NA	2	46.46	43.26	-3.2	NA
1954	CUL2	231.031	218.12	-0.0886	0.898433	NC	No	No	1	CUL2_exon_chr10:35010442	1	1	0	NA	5	10.69	10.83	0.14	NA
1955	CREM	61.7813	75.5286	0.2983	1	NC	No	No	2	CREM_exon_chr10:35179133	0.4822	0.4433	-0.0388	NA	1
1956	CREM									CREM_exon_chr10:35211253	0.5178	0.5567	0.0388	NA	6	29.2	39.68	10.48	NA
1957	AL117336.2	22.2186	15.384	-0.5582	1	NC	No	No	1	AL117336.2_exon_chr10:35315425	1	1	0	NA	2	67.24	72.39	5.15	NA
1958	CCNY	239.403	233.744	-0.0315	1	NC	No	No	1	CCNY_exon_chr10:35569053	1	1	0	NA	8	54.96	59.6	4.65	NA
1959	NAMPTP1	160.497	154.693	-0.0637	1	NC	No	No	1	NAMPTP1_exon_chr10:36524234	1	1	0	NA	3	31.73	27.64	-4.09	NA
1960	ZNF248	27.5777	22.0919	-0.3021	1	NC	No	No	1	ZNF248_exon_chr10:37833116	1	1	0	NA	1
1961	ZNF25	5.3754	10.2992	0.9801	1	NC	No	No	1	ZNF25_exon_chr10:37953195	1	1	0	NA	1
1962	ZNF33A	173.008	162.617	-0.1012	0.900793	NC	No	No	1	ZNF33A_exon_chr10:38054374	1	1	0	NA	8	90.23	83.78	-6.46	NA
1963	ZNF37A	162.833	155.669	-0.0751	1	NC	No	No	1	ZNF37A_exon_chr10:38117389	1	1	0	NA	15	57.68	61.18	3.49	NA
1964	HSD17B7P2	170.411	174.607	0.0435	1	NC	No	No	1	HSD17B7P2_exon_chr10:38377984	1	1	0	NA	1
1965	AL133216.2	6.9757	8.3752	0.2025	1	NC	No	No	1	AL133216.2_exon_chr10:38447814	1	1	0	NA	2	55.31	47.92	-7.39	NA
1966	AL133173.2	30.5352	36.1236	0.2213	1	NC	No	No	1	AL133173.2_exon_chr10:38617254	1	1	0	NA	2	90.32	82.06	-8.27	NA
1967	CCNYL2	18.942	14.0701	-0.4164	1	NC	No	No	1	CCNYL2_exon_chr10:42410193	1	1	0	NA	3	58.15	62.74	4.59	NA
1968	LINC00839	36.2418	33.0509	-0.1288	1	NC	No	No	2	LINC00839_exon_chr10:42477061	0.2043	0.1966	-0.0077	NA	3	74.32	62.97	-11.35	NA
1969	LINC00839									LINC00839_exon_chr10:42492079	0.7957	0.8034	0.0077	NA	3	43.18	51	7.82	NA
1970	ZNF37BP	70.6033	72.9946	0.0509	1	NC	No	No	1	ZNF37BP_exon_chr10:42521127	1	1	0	NA	14	53.7	63.68	9.98	NA
1971	ZNF33B	91.0352	76.2824	-0.2556	0.715087	NC	No	No	2	ZNF33B_exon_chr10:42583123	0.1259	0.1468	0.0209	NA	4	71.94	83.36	11.42	NA
1972	ZNF33B									ZNF33B_exon_chr10:42594699	0.8741	0.8532	-0.0209	NA	8	62.09	55.82	-6.26	NA
1973	BMS1	701.093	751.678	0.1055	0.51779	NC	No	No	3	BMS1_exon_chr10:42796473	0.2035	0.1975	-0.006	NA	3	93.17	96.43	3.26	NA
1974	BMS1									BMS1_exon_chr10:42817317	0.1721	0.1759	0.0038	NA	2	61.43	62.53	1.1	NA
1975	BMS1									BMS1_exon_chr10:42830865	0.5448	0.5507	0.0059	NA	1
1976	RET	16.5334	8.9012	-0.8773	1	NC	No	No	3	RET_exon_chr10:43102301	0.6044	0.6993	0.0949	NA	1
1977	RET									RET_exon_chr10:43126574	0.1226	0.1166	-0.006	NA	1
1978	RET									RET_exon_chr10:43128111	0.273	0.1841	-0.0889	NA	3	53.98	66.18	12.2	NA
1979	CSGALNACT2	46.4566	57.7035	0.3202	1	NC	No	No	2	CSGALNACT2_exon_chr10:43154896	0.2002	0.2031	0.0029	NA	1
1980	CSGALNACT2									CSGALNACT2_exon_chr10:43183249	0.7998	0.7969	-0.0029	NA	1
1981	RASGEF1A	96.3715	115.092	0.2625	0.623101	NC	No	No	1	RASGEF1A_exon_chr10:43196268	1	1	0	NA	3	45.7	39.38	-6.32	NA
1982	HNRNPF	1737.02	1758.19	0.0206	0.824267	NC	No	No	1	HNRNPF_exon_chr10:43387936	1	1	0	NA	6	40.4	40.72	0.32	NA
1983	ZNF487	11.2356	9.2694	-0.3274	1	NC	No	No	2	ZNF487_exon_chr10:43451919	0.2615	0.3488	0.0873	NA	1
1984	ZNF487									ZNF487_exon_chr10:43481428	0.7385	0.6512	-0.0873	NA	1
1985	ZNF239	10.7551	9.3276	-0.2174	1	NC	No	No	1	ZNF239_exon_chr10:43558171	1	1	0	NA	1
1986	ZNF485	12.0439	17.2282	0.5128	1	NC	No	No	1	ZNF485_exon_chr10:43616290	1	1	0	NA	3	44.61	53.64	9.03	NA
1987	ZNF32	46.1134	42.7488	-0.1056	1	NC	No	No	1	ZNF32_exon_chr10:43644801	1	1	0	NA	1
1988	RASSF4	8.1639	12.1199	0.5294	1	NC	No	No	2	RASSF4_exon_chr10:44990947	0.0989	0.0274	-0.0714	NA	1
1989	RASSF4									RASSF4_exon_chr10:44993268	0.9011	0.9726	0.0714	NA	1
1990	ZNF22	56.7576	60.5704	0.1076	1	NC	No	No	1	ZNF22_exon_chr10:45003279	1	1	0	NA	2	93.57	91.35	-2.22	NA
1991	RPS19P7	92.7014	124.438	0.4138	0.273658	NC	No	No	1	RPS19P7_exon_chr10:45073541	1	1	0	NA	1
1992	2020-03-08	102.118	105.295	0.0452	1	NC	No	No	2	MARCH8_exon_chr10:45458543	0.502	0.5048	0.0029	NA	1
1993	2020-03-08									MARCH8_exon_chr10:GL383546v1	0.498	0.4952	-0.0029	NA	1
1994	ZFAND4	21.8866	24.9877	0.208	1	NC	No	No	3	ZFAND4_exon_chr10:45616571	0.396	0.4626	0.0667	NA	3	88.98	77.58	-11.4	NA
1995	ZFAND4									ZFAND4_exon_chr10:45618260	0.4725	0.5037	0.0311	NA	2	84.75	58.51	-26.25	NA
1996	ZFAND4									ZFAND4_exon_chr10:45639963	0.1315	0.0337	-0.0978	NA	1
1997	WASHC2C	93.6394	92.008	-0.0144	1	NC	No	No	2	WASHC2C_exon_chr10:45751481	0.0536	0.0569	0.0033	NA	1
1998	WASHC2C									WASHC2C_exon_chr10:45792260	0.8626	0.8768	0.0142	NA	2	65.8	59.41	-6.39	NA
[truncated: 16,496 more rows]

## Sheet: PUM1&2 RNAi
PUM1&2 RNAi PAC-Seq Differential Expression Analysis
Sort Refresh	Gene Name	Mean Counts NTC RNAi	Mean Counts PUM1&2 RNAi	Log2 Fold Change (PUM1&2 relative to NTC)	pAdj	DE Result	Any Splicing APA?	Any Tandem APA?	#Exons with a PAC	Exon Names	Exon fraction NTC RNAi	Exon fraction PUM1&2 RNAi	Exon Fraction Change	Exon Results_x000D_ (NA = Not significant)	#PACs per Exon	PDU per Exon NTC RNAi	PDU per Exon PUM1&2 RNAi	delta-PDU per Exon	PAC Changes
36	DVL1	172.412	251.244	0.5387	0.000182577	UP	No	No	1	DVL1_exon_chr1:1336515	1	1	0	NA	1
43	ATAD3B	158.199	232.147	0.5519	0.000358534	UP	No	No	1	ATAD3B_exon_chr1:1495484	1	1	0	NA	1
88	WRAP73	89.4493	122.782	0.4685	0.0416859	UP	No	No	2	WRAP73_exon_chr1:3637098	0.8824	0.9592	0.0768	NA	1
93	CEP104	118.613	156.406	0.4112	0.028226	UP	No	No	1	CEP104_exon_chr1:3815517	1	1	0	NA	7	20.55	16.56	-3.99	NA
114	KLHL21	81.0898	120.458	0.5615	0.0132128	UP	No	No	1	KLHL21_exon_chr1:6595557	1	1	0	NA	1
133	SPSB1	34.0788	63.4038	0.9004	0.002883	UP	No	Yes	1	SPSB1_exon_chr1:9367447	1	1	0	NA	2	78.64	67.94	-10.7	Shortening
154	PEX14	153.947	216.922	0.491	0.0023335	UP	No	No	1	PEX14_exon_chr1:10629530	1	1	0	NA	1
175	VPS13D	49.417	86.9181	0.8192	0.00177691	UP	No	No	1	VPS13D_exon_chr1:12508892	1	1	0	NA	6	72.39	73.94	1.56	NA
196	EPHA2	151.722	231.312	0.6134	0.000104743	UP	No	No	1	EPHA2_exon_chr1:16125320	1	1	0	NA	1
201	NECAP2	116.8	153.719	0.387	0.0482529	UP	No	No	2	NECAP2_exon_chr1:16441165	0.1771	0.1609	-0.0162	NA	1
217	MFAP2	210.379	279.787	0.4117	0.00705568	UP	No	No	1	MFAP2_exon_chr1:16975023	1	1	0	NA	1
218	ATP13A2	234.535	305.804	0.381	0.0187603	UP	No	No	1	ATP13A2_exon_chr1:16986358	1	1	0	NA	1
222	ARHGEF10L	39.789	85.1255	1.0773	7.99556e-05	UP	No	No	1	ARHGEF10L_exon_chr1:17696847	1	1	0	NA	1
225	IFFO2	30.6172	100.265	1.7181	3.68945e-11	UP	No	No	1	IFFO2_exon_chr1:18908666	1	1	0	NA	3	97.72	91.36	-6.36	NA
276	ELOA	137.241	181.148	0.4072	0.0185574	UP	No	Yes	2	ELOA_exon_chr1:23750844	0.3508	0.2907	-0.0601	NA	3	92.88	88.69	-4.19	NA
301	CLIC4	250.49	395.976	0.6582	1.05814e-08	UP	No	No	1	CLIC4_exon_chr1:24840772	1	1	0	NA	10	87.13	84.08	-3.05	NA
307	TMEM50A	340.09	461.137	0.4386	0.000145128	UP	No	No	1	TMEM50A_exon_chr1:25360659	1	1	0	NA	7	16.63	13.39	-3.24	NA
342	SLC9A1	83.9569	140.786	0.7367	0.000234703	UP	No	No	1	SLC9A1_exon_chr1:27100644	1	1	0	NA	1
368	SESN2	70.072	111.418	0.6697	0.0121496	UP	No	No	1	SESN2_exon_chr1:28280715	1	1	0	NA	1
394	TINAGL1	59.2568	145.063	1.2913	4.15358e-11	UP	No	No	1	TINAGL1_exon_chr1:31586838	1	1	0	NA	1
429	GJB3	49.0629	81.5813	0.7544	0.00902213	UP	No	No	1	GJB3_exon_chr1:34784737	1	1	0	NA	1
470	SNIP1	39.7714	71.3044	0.8473	0.00402086	UP	No	Yes	1	SNIP1_exon_chr1:37538012	1	1	0	NA	3	45.3	34.6	-10.71	Both
481	YRDC	147.356	200.346	0.4473	0.00459041	UP	No	No	1	YRDC_exon_chr1:37803997	1	1	0	NA	5	82.34	88.06	5.72	NA
486	FHL3	112.679	166.692	0.5711	0.00221141	UP	No	No	1	FHL3_exon_chr1:37997559	1	1	0	NA	1
494	MACF1	199.377	317.394	0.6679	6.66773e-07	UP	No	No	2	MACF1_exon_chr1:39429826	0.1518	0.0946	-0.0572	NA	1
513	CAP1	1236.73	1610.44	0.3826	3.81137e-08	UP	No	No	1	CAP1_exon_chr1:40071449	1	1	0	NA	1
532	FOXJ3	126.769	170.44	0.4354	0.0187223	UP	No	No	1	FOXJ3_exon_chr1:42179825	1	1	0	NA	1
536	PPIH	147.927	205.799	0.4896	0.00310345	UP	No	No	1	PPIH_exon_chr1:42676583	1	1	0	NA	1
541	P3H1	149.175	199.343	0.4076	0.0234544	UP	No	No	1	P3H1_exon_chr1:42747798	1	1	0	NA	1
545	SLC2A1	233.097	736.649	1.663	3.28859e-64	UP	No	No	1	SLC2A1_exon_chr1:42927241	1	1	0	NA	1
560	ATP6V0B	194.434	268.737	0.4586	0.00463322	UP	No	No	1	ATP6V0B_exon_chr1:43976301	1	1	0	NA	1
566	RNF220	114.272	173.221	0.5933	0.000850202	UP	Yes	No	2	RNF220_exon_chr1:44636029	0.1961	0.0864	-0.1096	NA	2	79.67	72.3	-7.38	NA
576	PLK3	80.7172	141.369	0.8038	5.43438e-05	UP	No	No	1	PLK3_exon_chr1:44805486	1	1	0	NA	1
615	EFCAB14	117.931	162.525	0.4552	0.0115062	UP	No	No	1	EFCAB14_exon_chr1:46678636	1	1	0	NA	9	88.61	82.12	-6.48	NA
624	RNF11	92.4605	128.716	0.4845	0.0256252	UP	No	No	1	RNF11_exon_chr1:51271150	1	1	0	NA	10	77.22	77.28	0.07	NA
627	OSBPL9	88.6879	125.502	0.5085	0.0197462	UP	No	No	1	OSBPL9_exon_chr1:51787714	1	1	0	NA	8	79.59	79.62	0.04	NA
634	CC2D1B	193.88	285.519	0.5643	8.11233e-05	UP	No	No	1	CC2D1B_exon_chr1:52353647	1	1	0	NA	1
673	USP24	86.6726	120.611	0.4691	0.0385916	UP	No	No	1	USP24_exon_chr1:55069107	1	1	0	NA	6	60.05	57.75	-2.29	NA
708	LEPROT	45.1014	72.7976	0.674	0.0218472	UP	No	No	1	LEPROT_exon_chr1:65431802	1	1	0	NA	6	43.12	38.71	-4.41	NA
711	MIER1	51.718	82.0238	0.6678	0.0142277	UP	Yes	No	4	MIER1_exon_chr1:66946149	0.0617	0.0658	0.0042	NA	1
725	AL138789.1	59.9088	100.82	0.754	0.00448651	UP	No	Yes	1	AL138789.1_exon_chr1:68482760	1	1	0	NA	4	38.47	27.9	-10.56	Shortening
734	ZRANB2	173.334	237.856	0.4601	0.00241993	UP	No	No	3	ZRANB2_exon_chr1:71065137	0.867	0.8688	0.0017	NA	6	78.79	80.62	1.83	NA
738	CRYZ	64.8596	100.052	0.6279	0.0111724	UP	No	No	1	CRYZ_exon_chr1:74706457	1	1	0	NA	1
739	TYW3	218.325	293.525	0.429	0.0122178	UP	No	No	2	TYW3_exon_chr1:74752291	0.09	0.0518	-0.0381	NA	1
742	RABGGTB	235.75	455.055	0.9519	1.53163e-17	UP	No	No	1	RABGGTB_exon_chr1:75794509	1	1	0	NA	2	55.28	50.28	-5.01	NA
747	USP33	241.805	325.209	0.4209	0.00173892	UP	No	No	1	USP33_exon_chr1:77697931	1	1	0	NA	1
751	FUBP1	314.485	413.504	0.3997	0.0010874	UP	No	No	3	FUBP1_exon_chr1:77944269	0.0971	0.0811	-0.016	NA	1
755	DNAJB4	75.2942	151.069	1.0017	1.42463e-07	UP	No	Yes	1	DNAJB4_exon_chr1:78016013	1	1	0	NA	8	52.5	44.15	-8.35	Both
772	C1orf52	63.6144	94.6483	0.5732	0.037031	UP	No	No	1	C1orf52_exon_chr1:85252702	1	1	0	NA	7	67.29	60.85	-6.44	NA
773	BCL10	21.6714	45.6886	1.0753	0.0117517	UP	No	No	1	BCL10_exon_chr1:85267982	1	1	0	NA	7	23.26	25.06	1.8	NA
775	CCN1	180.214	313.726	0.8008	2.30089e-07	UP	No	No	1	CCN1_exon_chr1:85582739	1	1	0	NA	1
787	GTF2B	72.5796	114.29	0.6464	0.00518337	UP	No	No	1	GTF2B_exon_chr1:88853346	1	1	0	NA	1
813	MTF2	82.6917	121.002	0.5538	0.00985544	UP	Yes	No	2	MTF2_exon_chr1:93133702	0.2385	0.1149	-0.1236	NA	1
831	GCLM	127.541	245.125	0.9544	2.03521e-09	UP	No	No	1	GCLM_exon_chr1:93889159	1	1	0	NA	14	35.02	28.42	-6.59	NA
837	F3	98.4143	151.257	0.6302	0.0016622	UP	No	No	1	F3_exon_chr1:94530596	1	1	0	NA	1
839	CNN3	258.498	343.682	0.4141	0.00163899	UP	No	No	1	CNN3_exon_chr1:94898083	1	1	0	NA	4	51.74	52.57	0.83	NA
840	ALG14	31.0778	54.4868	0.8215	0.0253397	UP	No	No	1	ALG14_exon_chr1:94983633	1	1	0	NA	3	84.71	88.63	3.92	NA
852	AC118553.2	56.9092	124.769	1.1307	5.6005e-08	UP	No	No	1	AC118553.2_exon_chr1:100082002	1	1	0	NA	2	77.47	82.07	4.6	NA
853	AC093019.2	26.8027	56.9977	1.1036	0.000669423	UP	No	No	1	AC093019.2_exon_chr1:100085434	1	1	0	NA	1
854	SASS6	58.0786	100.719	0.8101	0.00105896	UP	No	Yes	3	SASS6_exon_chr1:100107553	0.5576	0.496	-0.0616	NA	1
863	SLC30A7	43.8113	75.717	0.8007	0.00908678	UP	No	No	1	SLC30A7_exon_chr1:100974809	1	1	0	NA	7	59.27	62.92	3.65	NA
880	TAF13	171.742	298.082	0.7968	1.30184e-08	UP	No	No	1	TAF13_exon_chr1:109063072	1	1	0	NA	1
881	TMEM167B	41.3148	77.9237	0.9021	0.00416347	UP	No	No	1	TMEM167B_exon_chr1:109094416	1	1	0	NA	2	80.46	72.76	-7.7	NA
907	LAMTOR5	900.549	1340.54	0.5741	5.30516e-16	UP	No	No	1	LAMTOR5_exon_chr1:110401583	1	1	0	NA	1
940	HIPK1	70.4583	104.045	0.5665	0.0178973	UP	No	No	1	HIPK1_exon_chr1:113973023	1	1	0	NA	1
952	CD58	28.1612	47.3157	0.7655	0.0435979	UP	No	No	2	CD58_exon_chr1:116514822	0.7843	0.7167	-0.0676	NA	1
954	IGSF3	58.3022	100.289	0.7742	0.00119909	UP	No	No	1	IGSF3_exon_chr1:116577562	1	1	0	NA	4	90.63	88.97	-1.67	NA
970	ZNF697	9.8623	25.6759	1.3906	0.0140429	UP	No	Yes	1	ZNF697_exon_chr1:119624116	1	1	0	NA	5	88.74	93.39	4.65	Lengthening
982	FAM72B	96.2305	132.63	0.4676	0.0252472	UP	No	No	1	FAM72B_exon_chr1:121168835	1	1	0	NA	4	67	60.96	-6.04	NA
984	FAM72C	82.371	124.607	0.6023	0.00518452	UP	No	No	1	FAM72C_exon_chr1:143956481	1	1	0	NA	4	66.11	63.51	-2.6	NA
1009	NOTCH2NLA	218.346	306.236	0.4892	0.000462549	UP	No	No	1	NOTCH2NLA_exon_chr1:146156229	1	1	0	NA	1
1027	NOTCH2NLB	219.791	313.843	0.5153	0.000155705	UP	No	No	1	NOTCH2NLB_exon_chr1:148607159	1	1	0	NA	1
1032	NOTCH2NLC	232.613	327.662	0.4961	0.000204507	UP	No	No	1	NOTCH2NLC_exon_chr1:149464076	1	1	0	NA	1
1058	ADAMTSL4-AS1	240.267	351.832	0.5558	1.00497e-05	UP	No	No	1	ADAMTSL4-AS1_exon_chr1:150577491	1	1	0	NA	5	82.96	73.33	-9.63	NA
1069	CDC42SE1	128.357	190.54	0.5557	0.00372709	UP	No	No	1	CDC42SE1_exon_chr1:151053327	1	1	0	NA	1
1091	S100A11	1476.34	2184.87	0.5635	1.08525e-13	UP	No	No	1	S100A11_exon_chr1:152032823	1	1	0	NA	1
1173	MSTO2P	168.369	245.446	0.5537	0.000239282	UP	No	No	1	MSTO2P_exon_chr1:155749922	1	1	0	NA	2	15.66	14.94	-0.73	NA
1224	PEA15	158.823	217.188	0.459	0.00984317	UP	No	No	1	PEA15_exon_chr1:160213421	1	1	0	NA	3	76.45	80.51	4.06	NA
1230	NCSTN	97.5822	156.322	0.6684	0.000615976	UP	No	No	1	NCSTN_exon_chr1:160358148	1	1	0	NA	1
1243	TOMM40L	67.6052	106.958	0.6682	0.00367652	UP	No	No	1	TOMM40L_exon_chr1:161228185	1	1	0	NA	2	27.43	23.98	-3.45	NA
1253	UAP1	96.6883	149.327	0.6189	0.00288057	UP	No	No	1	UAP1_exon_chr1:162599270	1	1	0	NA	1
1275	ATP1B1	203.581	316.901	0.6467	1.67663e-05	UP	No	No	1	ATP1B1_exon_chr1:169131291	1	1	0	NA	3	92.85	87.72	-5.13	NA
1293	SUCO	72.4993	109.784	0.6002	0.0105375	UP	No	No	1	SUCO_exon_chr1:172609815	1	1	0	NA	1
1309	RASAL2	23.8778	50.881	1.1174	0.002762	UP	No	No	1	RASAL2_exon_chr1:178473074	1	1	0	NA	6	91.39	88.44	-2.96	NA
1313	ABL2	23.8622	47.5608	1.0044	0.00597586	UP	No	No	1	ABL2_exon_chr1:179109441	1	1	0	NA	5	38.36	55.92	17.56	NA
1332	EIF1P3	351.376	457.16	0.3859	0.000858196	UP	No	No	1	EIF1P3_exon_chr1:182336000	1	1	0	NA	1
1342	LAMC2	33.4902	54.6216	0.6985	0.0364947	UP	Yes	No	2	LAMC2_exon_chr1:183237351	0.2267	0.071	-0.1556	NA	1
1351	EDEM3	31.145	70.9881	1.1852	0.000368282	UP	No	No	1	EDEM3_exon_chr1:184694472	1	1	0	NA	1
1384	DENND1B	26.0916	57.1889	1.1286	0.00085861	UP	No	Yes	2	DENND1B_exon_chr1:197510972	0.8033	0.9611	0.1577	Up	6	83.34	61.07	-22.27	Shortening
1397	CAMSAP2	176.034	278.551	0.6568	2.69121e-06	UP	No	No	3	CAMSAP2_exon_chr1:200848031	0.5474	0.4914	-0.056	NA	6	13.17	11.3	-1.87	NA
1413	ARL8A	34.5455	85.7631	1.3065	4.32318e-07	UP	No	No	1	ARL8A_exon_chr1:202134516	1	1	0	NA	1
1417	KDM5B	38.6465	72.4018	0.9133	0.001227	UP	No	No	2	KDM5B_exon_chr1:202734315	0.8579	0.8588	0.0009	NA	8	64.41	61.06	-3.35	NA
1426	BTG2	83.9978	128.086	0.6064	0.00991595	UP	No	No	1	BTG2_exon_chr1:203307103	1	1	0	NA	1
1433	HSPE1P6	94.2586	159.072	0.7529	7.06004e-05	UP	No	No	1	HSPE1P6_exon_chr1:203904013	1	1	0	NA	1
1456	FAM72A	98.7646	136.167	0.4646	0.0303807	UP	No	No	1	FAM72A_exon_chr1:206187373	1	1	0	NA	5	66.34	59.99	-6.34	NA
1466	MAPKAPK2	128.134	166.687	0.3832	0.0342597	UP	No	No	1	MAPKAPK2_exon_chr1:206731805	1	1	0	NA	2	93.68	93.34	-0.34	NA
1469	YOD1	62.6698	98.7519	0.6598	0.00879863	UP	No	No	1	YOD1_exon_chr1:207049723	1	1	0	NA	8	93.86	91.35	-2.51	NA
1471	CD55	101.846	150.533	0.5598	0.00386132	UP	No	No	1	CD55_exon_chr1:207359545	1	1	0	NA	7	88.66	89.61	0.95	NA
1475	LAMB3	432.217	611.132	0.4949	7.95056e-07	UP	No	No	1	LAMB3_exon_chr1:209615407	1	1	0	NA	1
1497	BATF3	14.2844	37.8346	1.4057	0.00107196	UP	No	No	1	BATF3_exon_chr1:212686979	1	1	0	NA	2	42.22	42.26	0.04	NA
1552	WDR26	110.993	183.836	0.7274	7.78261e-06	UP	No	No	1	WDR26_exon_chr1:224389860	1	1	0	NA	1
1558	LBR	263.017	370.467	0.5007	0.000140139	UP	No	No	1	LBR_exon_chr1:225403463	1	1	0	NA	1
1568	SDE2	57.4794	86.1396	0.5835	0.0299801	UP	No	No	2	SDE2_exon_chr1:225985523	0.8889	0.9221	0.0332	NA	4	95.21	91.06	-4.14	NA
1580	PSEN2	42.9631	65.7271	0.6077	0.0436559	UP	No	No	1	PSEN2_exon_chr1:226895423	1	1	0	NA	2	94.1	93.63	-0.47	NA
1592	ARF1	1102.8	1529.79	0.472	3.48229e-12	UP	No	No	1	ARF1_exon_chr1:228097077	1	1	0	NA	5	90.14	91.62	1.48	NA
1607	CCSAP	95.4204	141.302	0.5606	0.00905916	UP	No	No	1	CCSAP_exon_chr1:229325411	1	1	0	NA	5	94.07	94.06	-0.01	NA
[truncated: 17,579 more rows]

## Sheet: CNOT1 RNAi
CNOT1 RNAi PAC-Seq Differential Expression Analysis
[truncated: 18,287 more rows]

## Sheet: CNOT7&8 RNAi
CNOT7&8 RNAi PAC-Seq Differential Expression Analysis
[truncated: 18,604 more rows]
