# Supplementary material
Source: HighWire-hosted journal article supplement (doi:10.1101/rna.078436.120)
Supplement: Supplemental_Table_S3.xlsx [file Supplemental_Table_S3.xlsx]

## Sheet: Fig 2F
Supplemental Table S3. Gene lists from comparisons and GO term results
Enwerem et al
Figure S2F
		Stastical Significance:	p<0.000001	p<0.000001	p<0.000001	p<0.000001
PUM1&2 RNAi	CNOT1 RNAi	CNOT7&8 RNAi	[PUM1&2] vs [CNOT1]	[PUM1&2] vs [CNOT78]	[CNOT7&8 RNAi] vs [CNOT1]	[PUM1&2] vs [CNOT1] vs [CNOT7&8]
MARCH_6	MARCH_3	MARCH_3	7SK	A4GALT	MARCH_3	A4GALT
7SK	MARCH_5	MARCH_5	A4GALT	ABHD17B	MARCH_5	ABHD17B
A4GALT	MARCH_7	MARCH_8	ABHD17B	ABL2	MARCH_8	ABL2
ABHD17B	MARCH_8	A4GALT	ABL2	AC004997.1	A4GALT	AC004997.1
ABL2	7SK	AADACP1	AC004997.1	AC006511.5	AAR2	AC006511.5
AC004997.1	A4GALT	AAR2	AC006511.5	AC012213.5	ABAT	AC012213.5
AC006511.5	AAR2	ABAT	AC010198.2	AC027644.4	ABCF3	AC027644.4
AC009041.2	AASS	ABCF3	AC012213.5	AC044839.3	ABHD15	AC044839.3
AC009088.3	ABAT	ABHD15	AC027644.4	AC051619.6	ABHD17B	AC051619.6
AC010198.2	ABCD1	ABHD17B	AC044839.3	AC118553.2	ABHD3	AC118553.2
AC012213.5	ABCF3	ABHD3	AC051619.6	AC136616.1	ABHD4	AC136616.1
AC012488.2	ABHD15	ABHD4	AC118553.2	ADGRG6	ABHD6	AFF4
AC027644.4	ABHD17B	ABHD6	AC136616.1	AFF4	ABHD8	AL121758.1
AC044839.3	ABHD18	ABHD8	ACBD5	AGPAT5	ABL1	AL133500.1
AC051619.6	ABHD3	ABL1	ADAMTSL4-AS1	AL049844.1	ABL2	ANKRD33B
AC060771.1	ABHD4	ABL2	AFF4	AL121758.1	ABRAXAS2	ANKRD50
AC068896.1	ABHD5	ABRAXAS2	AL121758.1	AL133500.1	ABT1	AP000944.5
AC092143.1	ABHD6	ABT1	AL133500.1	ALDH1A3	ABTB2	ARHGAP12
AC093019.2	ABHD8	ABTB2	ALKBH8	ANKRD33B	AC000120.2	ARHGAP27P1-BPTFP1-KPNA2P3
AC099811.2	ABI1	AC000120.2	AMMECR1	ANKRD50	AC004223.3	ARHGEF10L
AC110275.1	ABL1	AC004223.3	ANKRD33B	ANKRD52	AC004925.1	ARHGEF7
AC118553.2	ABL2	AC004510.1	ANKRD50	ANLN	AC004997.1	ARID3A
AC136616.1	ABRAXAS2	AC004925.1	AP000944.5	AP000944.5	AC005324.3	ARL5B
AC141586.1	ABT1	AC004997.1	APC	ARHGAP12	AC005410.2	ARL8A
ACAP2	ABTB2	AC005324.3	ARHGAP12	ARHGAP27P1-BPTFP1-KPNA2P3	AC006329.1	ASAP1
ACBD5	AC000120.2	AC005410.2	ARHGAP27P1-BPTFP1-KPNA2P3	ARHGEF10L	AC006511.5	ATP6V0E1
ADAMTSL4-AS1	AC002116.1	AC006329.1	ARHGEF10L	ARHGEF7	AC006978.2	ATP6V1B2
ADAMTSL5	AC004223.3	AC006453.2	ARHGEF7	ARID3A	AC007283.1	ATP6V1H
ADGRG6	AC004889.1	AC006511.5	ARID2	ARL5B	AC007773.1	B3GNT2
AFF4	AC004925.1	AC006538.2	ARID3A	ARL8A	AC008126.1	BAK1
AGO2	AC004997.1	AC006978.2	ARL5B	ASAP1	AC008738.2	BATF3
AGPAT5	AC005062.1	AC007283.1	ARL8A	ATP6V0E1	AC008966.1	BAZ1A
AGPS	AC005229.4	AC007773.1	ASAP1	ATP6V1B2	AC009065.2	BCL10
AIFM2	AC005324.3	AC008126.1	ATP6V0E1	ATP6V1H	AC009412.1	BHLHE40
AL049629.2	AC005410.2	AC008575.1	ATP6V1B2	B3GNT2	AC010624.5	BTG1
AL049844.1	AC005586.2	AC008738.2	ATP6V1H	BAK1	AC011497.2	BTG2
AL121758.1	AC006064.6	AC008966.1	B3GNT2	BAP1	AC012213.5	C17orf80
AL133500.1	AC006329.1	AC009065.2	BAG4	BATF3	AC012313.4	C18orf21
AL138789.1	AC006511.5	AC009412.1	BAK1	BAZ1A	AC013489.1	C1orf52
AL358113.1	AC006978.2	AC009487.2	BATF3	BCL10	AC018450.1	C2CD2L
AL365205.1	AC007283.1	AC010624.5	BAZ1A	BHLHE40	AC018512.1	C6orf136
AL445524.1	AC007773.1	AC010996.1	BCL10	BTG1	AC019069.1	CASKIN2
ALDH1A3	AC008012.1	AC011497.2	BHLHE40	BTG2	AC020934.1	CCDC12
ALG14	AC008126.1	AC012213.5	BTG1	C17orf80	AC020978.7	CCN1
ALKBH8	AC008687.1	AC012313.4	BTG2	C18orf21	AC021078.1	CCN2
AMMECR1	AC008738.2	AC013489.1	C17orf80	C1orf52	AC022167.2	CCNE2
AMMECR1L	AC008915.2	AC016397.2	C18orf21	C2CD2L	AC025165.3	CCNG2
ANK2	AC008966.1	AC017002.6	C1orf52	C6orf136	AC026464.6	CD2AP
ANKRD33B	AC009065.2	AC018450.1	C2CD2L	CARMIL1	AC027031.2	CD55
ANKRD50	AC009412.1	AC018512.1	C6orf136	CASKIN2	AC027644.4	CD58
ANKRD52	AC009779.2	AC019069.1	CA13	CCDC12	AC027801.4	CDC123
ANLN	AC010198.2	AC020934.1	CA2	CCN1	AC037459.1	CDC34
ANXA1	AC010624.5	AC020978.7	CALM2	CCN2	AC044839.3	CDC42SE1
AP000944.5	AC011497.2	AC021078.1	CAMSAP2	CCNE1	AC051619.6	CDK12
AP002807.1	AC011815.1	AC022167.2	CASKIN2	CCNE2	AC073610.1	CDK7
AP005263.1	AC012213.5	AC025165.3	CC2D1B	CCNG2	AC074143.1	CDK8
AP1AR	AC012313.4	AC026464.6	CCDC12	CD2AP	AC080079.2	CDKN1A
APC	AC013489.1	AC027031.2	CCDC126	CD47	AC083855.2	CDYL
APOOL	AC015813.6	AC027644.4	CCDC186	CD55	AC084035.1	CHST11
ARF1	AC015849.1	AC027801.4	CCN1	CD58	AC090004.1	CKS2
ARFGEF1	AC015849.12	AC037459.1	CCN2	CDC123	AC093866.1	CLN8
ARFIP1	AC016394.1	AC044839.3	CCNE2	CDC34	AC096677.2	CMIP
ARHGAP12	AC018450.1	AC051619.6	CCNG2	CDC42SE1	AC099850.2	CNEP1R1
ARHGAP27P1-BPTFP1-KPNA2P3	AC018512.1	AC055811.2	CCSAP	CDK12	AC100827.3	CNN3
ARHGEF10L	AC019069.1	AC073610.1	CD2AP	CDK7	AC103702.2	COMT
ARHGEF7	AC020765.5	AC073840.1	CD55	CDK8	AC103810.2	COQ10B
ARID2	AC020934.1	AC074143.1	CD58	CDKN1A	AC104447.1	CRIM1
ARID3A	AC020978.7	AC080079.2	CDC123	CDYL	AC105460.1	CSNK1G3
ARL5B	AC021078.1	AC083855.2	CDC34	CHST11	AC106886.5	CTSC
ARL6IP1	AC022107.1	AC084035.1	CDC42SE1	CHUK	AC108174.1	CYTH1
ARL8A	AC022167.2	AC089983.1	CDCP1	CKS2	AC114271.1	CYTH2
ARL8B	AC022210.2	AC090004.1	CDK12	CLASP2	AC118553.2	DENND3
ARMC7	AC025165.3	AC093866.1	CDK7	CLCN2	AC131009.3	DIP2B
ARNTL	AC025423.2	AC096677.2	CDK8	CLN8	AC136616.1	DKK1
ARPP19	AC026464.6	AC099850.2	CDKN1A	CMIP	AC137499.1	DLGAP4
ARRDC3	AC027031.2	AC100827.3	CDYL	CNEP1R1	AC234775.3	DNAJA2
ASAP1	AC027644.4	AC103702.2	CEMIP2	CNN3	AC243964.4	DNAJB4
ATAD3B	AC027801.4	AC103810.2	CENPC	COMT	AC253572.1	DNAJB9
ATP11B	AC036214.3	AC104447.1	CHCHD7	COQ10B	ACTR8	DNAJC24
ATP13A2	AC037459.1	AC105250.1	CHST11	CREB3L2	ADGRE5	DTX2
ATP13A3	AC044839.3	AC105460.1	CKS2	CRIM1	ADGRF1	DUSP16
ATP1B1	AC051619.6	AC106886.5	CLN8	CSNK1G3	ADM2	DUSP2
ATP6V0B	AC067852.2	AC108174.1	CMIP	CTSC	ADNP	DUSP4
ATP6V0E1	AC068491.1	AC114271.1	CNEP1R1	CYTH1	ADNP2	DUSP5
ATP6V1B2	AC068633.1	AC118553.2	CNN3	CYTH2	ADORA2B	DUSP8
ATP6V1H	AC073610.1	AC131009.3	CNOT6L	DENND3	ADPGK	EHD1
ATRN	AC074091.2	AC136616.1	CNOT8	DIP2B	ADPRHL2	EIF1P3
B3GNT2	AC074143.1	AC137499.1	COMT	DKK1	ADRB1	EIF4A3
B4GALNT1	AC074386.1	AC138894.1	COQ10B	DLAT	AFAP1	EIF4ENIF1
B4GALNT3	AC079949.2	AC147067.1	CRIM1	DLGAP4	AFF4	ELK1
BAG4	AC080079.2	AC234775.3	CSF2RA	DNAJA2	AFG1L	ELOA
BAK1	AC083855.2	AC243964.4	CSNK1G3	DNAJB4	AGFG1	EMC2
BAP1	AC084035.1	AC253572.1	CTAGE9	DNAJB9	AGFG2	EMC7
BATF3	AC087190.2	ACTR8	CTSC	DNAJC24	AGPAT4	ENTPD7
BAZ1A	AC090004.1	ADAP1	CTSL	DOCK9	AHCTF1	EPB41L5
BBS4	AC090517.4	ADAT3	CYP4F11	DTX2	AHDC1	EPC2
BCL10	AC093157.1	ADGRE5	CYTH1	DUSP16	AHR	EPHA2
BHLHE40	AC093423.3	ADGRF1	CYTH2	DUSP2	AHSA1	EPN2
BICDL1	AC093673.1	ADGRG6	DAAM1	DUSP4	AIMP2	EPS8L1
BMI1	AC093866.1	ADIPOR2	DAB2	DUSP5	AK6	ERCC1
BNIP2	AC096677.2	ADM2	DCUN1D1	DUSP8	AKAP8L	ETS1
BRAF	AC096711.1	ADNP	DENND3	EHD1	AKIRIN2	ETV5
BRD7	AC098487.1	ADNP2	DIP2B	EIF1P3	AKNA	EXOC8
BRD7P2	AC098934.3	ADORA2B	DKK1	EIF4A3	AKR1B10	F3
BRI3	AC099518.1	ADPGK	DLGAP4	EIF4ENIF1	AL031708.1	FAM104A
BTBD1	AC099518.3	ADPRHL2	DNAJA2	ELK1	AL035446.1	FAM126A
BTG1	AC099850.2	ADRB1	DNAJB4	ELOA	AL049795.2	FAM160B1
BTG2	AC100827.3	AFAP1	DNAJB9	EMC2	AL121758.1	FAM169A
C17orf80	AC100861.1	AFF4	DNAJC24	EMC7	AL121845.3	FAM214B
C18orf21	AC103702.2	AFG1L	DTX2	ENTPD7	AL133173.2	FBXO30
C1orf52	AC103810.2	AFG3L2	DUSP16	EPB41L5	AL133500.1	FEM1C
C2CD2L	AC104447.1	AFTPH	DUSP2	EPC2	AL135924.2	FERMT2
C4B	AC104472.3	AGAP3	DUSP4	EPHA2	AL139300.1	FGD4
C6orf136	AC105460.1	AGFG1	DUSP5	EPN2	AL158801.5	FGFR1OP
CA13	AC106886.2	AGFG2	DUSP8	EPS8L1	AL353807.3	FNIP1
CA2	AC106886.5	AGPAT4	E2F6	ERCC1	AL355315.1	FOSL1
CALM2	AC108174.1	AGPAT5	EDEM3	ERLEC1	AL355512.1	FOXN2
CAMSAP2	AC108676.1	AHCTF1	EEA1	ETS1	AL445524.2	FRMD8
CAP1	AC112220.2	AHDC1	EHD1	ETV5	AL671762.1	FXR2
CAPN5	AC113189.9	AHR	EIF1P3	EXOC8	AL691482.3	GCLM
CARMIL1	AC114271.1	AHSA1	EIF4A3	F3	ALAS1	GDPD1
CARNMT1	AC114490.2	AIMP2	EIF4ENIF1	FAM104A	ALDH1B1	GFOD1
CASKIN2	AC118553.2	AK6	ELK1	FAM126A	ALG2	GJB3
CASTOR2	AC131009.3	AKAP8L	ELOA	FAM160B1	ALKBH2	GNAI1
CBFB	AC133644.1	AKIRIN2	EMC2	FAM169A	AMBRA1	GOSR2
CC2D1B	AC136616.1	AKNA	EMC7	FAM214B	AMOTL2	GPAT3
CCDC12	AC137499.1	AKR1B10	ENTPD7	FBXO30	ANGPTL4	GRB10
CCDC126	AC139677.2	AL031708.1	EPB41L4B	FBXW11	ANKHD1-EIF4EBP3	GSK3B
CCDC186	AC234775.3	AL035446.1	EPB41L5	FEM1C	ANKRD13C	GTF2B
CCDC82	AC243964.4	AL049795.2	EPC2	FERMT2	ANKRD33B	GTF3C4
CCN1	AC244669.1	AL049844.1	EPHA2	FGD4	ANKRD37	H3F3B
CCN2	AC253572.1	AL121758.1	EPN2	FGFR1OP	ANKRD39	H3F3C
CCNE1	ACAD11	AL121845.3	EPS8L1	FGFR2	ANKRD50	HBEGF
CCNE2	ACBD3	AL133173.2	ERBIN	FKBP14	AP000769.1	HERC4
CCNG2	ACBD5	AL133500.1	ERCC1	FNIP1	AP000944.5	HIPK3
CCSAP	ACHE	AL135924.2	ERCC3	FOSL1	AP001160.4	HK2
CD2AP	ACP2	AL139300.1	EREG	FOXN2	AP001458.2	HMGCR
CD47	ACSL4	AL158801.5	ETS1	FRMD8	AP001469.3	HMGCS1
CD55	ACTN1	AL162417.1	ETV5	FXR2	AP001486.2	HMOX1
CD58	ACTN4	AL163636.2	EXOC8	GCLM	AP003108.2	HSPA13
CDC123	ACTR8	AL353807.3	F3	GDPD1	AP5B1	IFFO2
CDC34	ACTRT3	AL355315.1	FAM104A	GFOD1	APBA3	IFRD1
CDC42SE1	ACVR2A	AL355512.1	FAM126A	GFPT2	APBB1	INSIG2
CDC42SE2	ADAM22	AL365232.1	FAM160B1	GJB3	APBB2	IREB2
CDCP1	ADAMTSL4-AS1	AL445524.2	FAM169A	GNAI1	APOLD1	ISCA2
CDH1	ADGRE5	AL512430.2	FAM214B	GOSR2	ARC	ITCH
CDK1	ADGRF1	AL671762.1	FBXO30	GPAT3	ARFGAP2	ITGA2
CDK12	ADGRG1	AL691442.1	FCHSD1	GPCPD1	ARG2	ITGA5
CDK7	ADGRG5	AL691482.3	FEM1C	GRB10	ARHGAP1	ITPKC
CDK8	ADH5	AL928654.4	FERMT2	GSK3B	ARHGAP10	JMJD1C
CDKN1A	ADM2	ALAS1	FGD4	GTF2B	ARHGAP12	KCNK1
CDYL	ADNP	ALDH1A3	FGFR1OP	GTF3C4	ARHGAP27P1-BPTFP1-KPNA2P3	KDM2A
CEMIP2	ADNP2	ALDH1B1	FHL3	H3F3B	ARHGAP29	KDM5B
CENPC	ADORA2B	ALG1	FNIP1	H3F3C	ARHGAP32	KDM6B
CEP104	ADPGK	ALG2	FOSL1	HBEGF	ARHGAP42	KIAA1217
CEP135	ADPRH	ALKBH2	FOXJ3	HERC4	ARHGAP8	KLF2
CERT1	ADPRHL2	ALKBH5	FOXN2	HIPK3	ARHGDIB	KLF5
CHCHD7	ADRB1	ALS2CL	FRMD6	HK2	ARHGEF10L	KPNA2
CHMP6	ADRM1	AMBRA1	FRMD8	HMBOX1	ARHGEF2	KPNA4
CHST11	AEBP2	AMOTL2	FUBP1	HMGCR	ARHGEF28	KRAS
CHUK	AFAP1	ANGPTL4	FXR2	HMGCS1	ARHGEF35	LAMB3
CKS2	AFAP1L1	ANKHD1-EIF4EBP3	GABARAPL1	HMOX1	ARHGEF7	LDB1
CLASP2	AFAP1L2	ANKRD13B	GCLC	HSPA13	ARID1A	LDLR
CLCN2	AFDN	ANKRD13C	GCLM	IFFO2	ARID1B	LETM2
CLIC4	AFF4	ANKRD29	GDPD1	IFRD1	ARID3A	LIG4
CLN8	AFG1L	ANKRD33B	GFOD1	INSIG2	ARID3B	LIMA1
CMIP	AGAP2	ANKRD37	GJB3	IREB2	ARID5A	LIN54
CNEP1R1	AGAP2-AS1	ANKRD39	GNAI1	ISCA2	ARL14EPL	LIPH
CNN3	AGFG1	ANKRD50	GNL3	ITCH	ARL17A	LMBR1L
CNOT6L	AGFG2	ANKRD52	GOSR2	ITGA2	ARL4D	LMX1B
CNOT8	AGPAT4	ANKRD54	GPAT3	ITGA5	ARL5B	LRCH1
COG5	AHCTF1	ANKRD9	GRB10	ITPKC	ARL8A	LRCH3
COMT	AHDC1	ANLN	GSK3B	JMJD1C	ARMCX5-GPRASP2	LRP6
COQ10B	AHR	ANO4	GTF2B	KCNK1	ARNT	MAP1LC3B2
CREB3L2	AHSA1	AOPEP	GTF3C4	KDM2A	ARTN	MAP2K1
CRIM1	AIMP2	AP000769.1	GTPBP2	KDM5B	ASAH2B	MAP2K3
CRYZ	AJUBA	AP000944.5	H3F3B	KDM6B	ASAP1	MAP3K2
CSF2RA	AK6	AP001160.4	H3F3C	KIAA1217	ASB7	MAP3K7
CSNK1G3	AKAP10	AP001458.2	HBEGF	KLF2	ASCC1	MARK2
CTAGE9	AKAP13	AP001469.3	HELZ2	KLF5	ASF1A	MBIP
CTSC	AKAP17A	AP001486.2	HERC4	KPNA2	ASPHD1	MED13
CTSL	AKAP8L	AP003108.2	HHEX	KPNA4	ATAD1	MED17
CTU2	AKIRIN2	AP5B1	HIPK3	KRAS	ATF5	METRNL
CXADR	AKNA	APBA3	HK2	LAMB3	ATF7IP	MFSD9
CYP24A1	AKR1B10	APBB1	HLA-E	LDB1	ATF7IP2	MICB
CYP4F11	AKR1C3	APBB2	HMGCR	LDLR	ATG101	MIER1
CYTH1	AL031708.1	APOLD1	HMGCS1	LETM2	ATG4A	MIR6751
CYTH2	AL035446.1	ARC	HMOX1	LIG4	ATL2	MISP
DAAM1	AL049555.1	ARFGAP2	HSPA13	LIMA1	ATP5MF-PTCD1	MKNK2
DAB2	AL049697.1	ARFIP2	IFFO2	LIN54	ATP6V0E1	MON1A
DCK	AL049795.2	ARG2	IFNGR2	LIPH	ATP6V1B2	MORC3
DCTN6	AL121758.1	ARHGAP1	IFRD1	LMBR1L	ATP6V1H	MRPL39
DCUN1D1	AL121845.3	ARHGAP10	IMPA1	LMX1B	ATP8B1	MTF2
DCUN1D4	AL133173.2	ARHGAP12	INSIG2	LRCH1	ATXN2	MYADM
DENND1B	AL133500.1	ARHGAP23	IPMK	LRCH3	AUNIP	MYEOV
DENND3	AL135924.2	ARHGAP27P1-BPTFP1-KPNA2P3	IREB2	LRP6	AURKA	MYL9
DEPDC1B	AL136982.6	ARHGAP29	ISCA2	MAP1LC3B2	AVPI1	NABP1
DIP2B	AL138724.1	ARHGAP32	ITCH	MAP2K1	AZIN2	NBN
DKK1	AL139174.1	ARHGAP42	ITGA2	MAP2K3	B3GALT4	NCOA6
DLAT	AL139300.1	ARHGAP8	ITGA5	MAP3K2	B3GNT2	NDEL1
DLGAP4	AL157394.1	ARHGDIB	ITPKC	MAP3K7	B3GNT3	NECAP2
DNAJA2	AL157871.6	ARHGEF10L	JAZF1	MAPKAPK2	B3GNT4	NEDD4L
DNAJB4	AL158801.5	ARHGEF2	JMJD1C	MARK2	B3GNTL1	NEU1
DNAJB9	AL158835.3	ARHGEF28	JUNB	MARK4	B4GALT3	NFE2L3
DNAJC24	AL162431.1	ARHGEF35	KCNK1	MBIP	B4GALT4	NFKB2
DOCK9	AL162742.2	ARHGEF7	KDM2A	MED1	BACH1	NFKBIE
DPP8	AL353807.3	ARID1A	KDM5B	MED13	BAG2	NGFR
DTX2	AL355315.1	ARID1B	KDM6B	MED17	BAG3	NOP16
DUSP16	AL355512.1	ARID3A	KIAA0355	MED4	BAHD1	NOTCH2NLA
DUSP2	AL359921.1	ARID3B	KIAA1217	METRNL	BAIAP2	NOTCH2NLB
DUSP4	AL390719.1	ARID5A	KIF21A	MFAP2	BAIAP2L1	NOTCH2NLC
DUSP5	AL392086.2	ARID5B	KIF2A	MFSD9	BAK1	NPC1
DUSP6	AL445524.2	ARL14EPL	KLF2	MICB	BAMBI	NR1H2
DUSP8	AL512506.3	ARL17A	KLF5	MIER1	BATF3	NR4A1
DVL1	AL591806.4	ARL2-SNX15	KLK10	MINDY3	BAZ1A	NUDT4
E2F6	AL596442.3	ARL4D	KMT2E	MINK1	BAZ2A	NUP98
EAF1	AL662854.1	ARL5B	KPNA2	MIR6751	BBC3	OSBP
EDEM3	AL669830.1	ARL6IP5	KPNA4	MISP	BCAR1	OSBPL2
EEA1	AL671762.1	ARL8A	KRAS	MKNK2	BCAR3	OSBPL9
EFCAB14	AL691482.3	ARMCX5-GPRASP2	KRT15	MON1A	BCAS2	PANX1
EGR1	AL773541.1	ARNT	KRT18	MORC3	BCL10	PBDC1
EHD1	AL929236.1	ARTN	LAMB3	MRPL39	BCL2L11	PCGF2
EIF1P3	ALAS1	ASAH2B	LDB1	MTF2	BCL3	PDCD10
EIF3J	ALDH1B1	ASAP1	LDLR	MTMR6	BCL6	PDGFA
EIF4A3	ALDOC	ASB7	LEMD3	MYADM	BCL9L	PDGFB
EIF4E	ALG2	ASCC1	LEO1	MYEOV	BDH1	PEX14
EIF4ENIF1	ALG5	ASF1A	LETM2	MYL9	BDNF	PGM2L1
ELK1	ALKBH1	ASNSD1	LIG4	NABP1	BFSP1	PIAS1
ELK3	ALKBH2	ASPHD1	LIMA1	NBN	BHLHE40	PIAS4
ELOA	ALKBH8	ATAD1	LIN54	NCOA6	BIK	PIP4P1
EMC2	AMBRA1	ATF5	LIPH	NDEL1	BLCAP	PLAGL2
EMC7	AMMECR1	ATF7IP	LMBR1L	NECAP2	BMP4	PLAUR
ENTPD7	AMOTL1	ATF7IP2	LMBRD1	NEDD4L	BMP7	PLK3
EOGT	AMOTL2	ATG101	LMX1B	NEU1	BMPR1A	PNRC1
EPB41L4B	ANAPC10	ATG12	LRCH1	NFE2L3	BRD2	POLR2A
EPB41L5	ANGPTL4	ATG3	LRCH3	NFKB2	BRD4	POLR2B
EPC2	ANKHD1-EIF4EBP3	ATG4A	LRP6	NFKBIE	BRMS1L	PPM1B
EPHA1	ANKRD13C	ATL2	MAFF	NGFR	BSDC1	PPP2CB
EPHA2	ANKRD17	ATP5MF-PTCD1	MAP1LC3B	NIPA1	BTAF1	PPP2R1B
EPN2	ANKRD33B	ATP6V0E1	MAP1LC3B2	NOP16	BTBD10	PPP2R5B
EPS8L1	ANKRD37	ATP6V1B2	MAP2K1	NOTCH2NLA	BTG1	PPP4R2
ERBB2	ANKRD39	ATP6V1H	MAP2K3	NOTCH2NLB	BTG2	PPT2
ERBIN	ANKRD40	ATP8B1	MAP3K2	NOTCH2NLC	BYSL	PPTC7
ERCC1	ANKRD46	ATXN2	MAP3K7	NPC1	C12orf45	PRAG1
ERCC3	ANKRD50	AUNIP	MAP4K3	NR1H2	C12orf65	PRKCD
EREG	AP000357.1	AURKA	MAPK6	NR4A1	C15orf39	PRSS8
ERLEC1	AP000769.1	AVPI1	MARK2	NUDT4	C16orf72	PSD3
ERP44	AP000769.4	AXIN1	MBIP	NUP98	C16orf91	PSEN2
ESAM	AP000781.2	AZIN2	MCAM	OSBP	C17orf53	PSMG2
ETFDH	AP000944.5	B3GALT4	MED13	OSBPL2	C17orf67	PTP4A2P2
ETS1	AP001160.4	B3GNT2	MED17	OSBPL9	C17orf80	RAB22A
ETV5	AP001458.2	B3GNT3	MEF2A	OXR1	C18orf21	RAB5IF
EXOC6	AP001469.3	B3GNT4	METRNL	PANK3	C19orf47	RALGAPB
EXOC8	AP001486.2	B3GNTL1	MFSD9	PANX1	C1orf116	RAP1B
EXT2	AP003108.2	B4GALT3	MICB	PBDC1	C1orf52	RASAL2
EXTL3	AP003419.1	B4GALT4	MIER1	PCGF2	C2CD2L	RBM19
F3	AP4B1	BACE1	MIR21	PDCD10	C3orf52	RBM27
FAM104A	AP5B1	BACH1	MIR6751	PDGFA	C6orf136	RBM38
FAM107B	AP5M1	BAG2	MISP	PDGFB	C6orf223	RCL1
FAM126A	APBA3	BAG3	MKLN1	PEX14	C7orf26	RELB
FAM160B1	APBB1	BAHD1	MKNK2	PGM2L1	C8orf58	RESF1
FAM169A	APBB2	BAIAP2	MLLT6	PGM3	C8orf76	RGS14
FAM177A1	APC	BAIAP2L1	MND1	PIAS1	CA12	RHEB
FAM214B	APEX2	BAK1	MON1A	PIAS4	CAB39	RHOF
FAM72A	APH1B	BAMBI	MORC3	PIP4P1	CABLES1	RHPN2
FAM72B	APOBEC3F	BAP1	MRPL39	PLAGL2	CACHD1	RIC1
FAM72C	APOC1	BATF3	MSL1	PLAUR	CACYBPP2	RIOK1
FAM8A1	APOL2	BAZ1A	MSRB1	PLK3	CALHM2	RNF216
FBXO30	APOLD1	BAZ2A	MTF2	PNRC1	CAMSAP3	RNF38
FBXW11	APPBP2	BBC3	MTM1	POLR2A	CAPN12	RNFT1
FCHSD1	APTR	BBS9	MYADM	POLR2B	CARMIL2	SACM1L
FEM1C	ARC	BCAR1	MYEOV	PPARG	CASKIN2	SASH1
FERMT2	AREG	BCAR3	MYL9	PPM1B	CASP10	SBDS
FGD4	ARFGAP2	BCAS2	NABP1	PPP1R13L	CASP4	SBNO2
FGFR1OP	ARG2	BCCIP	NAGK	PPP2CB	CASP8	SCAMP2
FGFR1OP2	ARHGAP1	BCDIN3D	NAMPT	PPP2R1B	CASP9	SCYL1
FGFR2	ARHGAP10	BCL10	NAMPTP1	PPP2R5B	CAV1	SDE2
FGFR3	ARHGAP12	BCL2L1	NBN	PPP3R1	CBX4	SDF2
FHL3	ARHGAP17	BCL2L11	NCEH1	PPP4R2	CBX5	SEC24B
FKBP14	ARHGAP27	BCL3	NCOA3	PPT2	CBX8	SEC24D
FLNC	ARHGAP27P1-BPTFP1-KPNA2P3	BCL6	NCOA6	PPTC7	CCDC102A	SECISBP2L
FMNL2	ARHGAP29	BCL7A	NCSTN	PRAG1	CCDC107	SELENOI
FNIP1	ARHGAP32	BCL9L	NDEL1	PRKCD	CCDC117	SELENOS
FOSL1	ARHGAP42	BCLAF1P1	NDRG1	PRSS8	CCDC12	SERPINE1
FOXJ3	ARHGAP5	BCO2	NECAP2	PSD3	CCDC134	SERTAD1
FOXN2	ARHGAP5-AS1	BDH1	NEDD4L	PSEN2	CCDC32	SESN2
FP565260.6	ARHGAP8	BDNF	NEU1	PSMG2	CCDC59	SGTB
FRG1	ARHGDIB	BFSP1	NFE2L3	PTP4A2P2	CCDC71	SH2B3
FRMD6	ARHGEF1	BHLHE40	NFKB2	PTPRJ	CCL26	SH3BP2
FRMD8	ARHGEF10L	BIK	NFKBIE	PTPRK	CCN1	SIN3A
FTL	ARHGEF2	BLCAP	NGFR	RAB22A	CCN2	SKIL
FUBP1	ARHGEF26	BMP2K	NOP16	RAB5IF	CCNE2	SLC26A11
FUBP3	ARHGEF28	BMP4	NOTCH2NLA	RALGAPB	CCNG1	SLC2A1
FUNDC1	ARHGEF3	BMP6	NOTCH2NLB	RAP1B	CCNG2	SLC30A7
FXR2	ARHGEF34P	BMP7	NOTCH2NLC	RASAL2	CCR10	SLC37A3
FZD6	ARHGEF35	BMPR1A	NPC1	RBM19	CCSER2	SLC43A2
GABARAPL1	ARHGEF5	BNIP3	NR1H2	RBM27	CD2AP	SLC6A10P
GAL	ARHGEF7	BRD1	NR4A1	RBM38	CD40	SLC9A1
GALNT2	ARID1A	BRD2	NUDT4	RCL1	CD55	SMAD7
GCLC	ARID1B	BRD4	NUFIP2	RELB	CD58	SNAI1
GCLM	ARID2	BRMS1L	NUP98	RESF1	CDA	SNIP1
GDPD1	ARID3A	BRPF1	OSBP	RGS14	CDC123	SNX4
GFOD1	ARID3B	BRSK2	OSBPL2	RHEB	CDC34	SNX9
GFPT2	ARID4A	BSDC1	OSBPL9	RHOF	CDC37L1	SP100
GJB3	ARID4B	BTAF1	OSGIN1	RHPN2	CDC42SE1	SPINDOC
GMFB	ARID5A	BTBD10	PANX1	RIC1	CDC5L	SPRY2
GNAI1	ARL14EPL	BTG1	PARD6B	RIOK1	CDC73	SPSB1
GNAQ	ARL17A	BTG2	PARP12	RNF216	CDIP1	STXBP5
GNL3	ARL4D	BYSL	PBDC1	RNF220	CDK12	SYNJ2
GNPTAB	ARL5B	C11orf24	PCGF2	RNF38	CDK17	TACC1
GOLIM4	ARL8A	C12orf45	PDCD10	RNFT1	CDK18	TAF13
GOSR2	ARMC6	C12orf65	PDGFA	SACM1L	CDK7	TAF4
GPAT3	ARMC8	C15orf39	PDGFB	SASH1	CDK8	TAF4B
GPATCH1	ARMCX5-GPRASP2	C15orf41	PDLIM7	SBDS	CDK9	TANC1
GPCPD1	ARMH1	C16orf72	PEX14	SBNO1	CDKN1A	TAOK1
GRB10	ARNT	C16orf91	PGM2L1	SBNO2	CDKN1B	TASOR2
GRHL1	ARTN	C17orf53	PIAS1	SCAMP2	CDKN2B	TBC1D12
GRK3	ASAH2B	C17orf67	PIAS4	SCYL1	CDR2	TBPL1
GSK3A	ASAP1	C17orf80	PIGG	SDE2	CDR2L	TBX18
GSK3B	ASB3	C18orf21	PIKFYVE	SDF2	CDV3	TEX10
GTF2B	ASB6	C19orf47	PIP4P1	SEC24B	CDX2	TIPARP
GTF3C4	ASB7	C1orf116	PLAGL2	SEC24D	CDYL	TJP1
GTPBP2	ASCC1	C1orf52	PLAT	SECISBP2L	CEBPA	TMED7-TICAM2
H3F3B	ASCL5	C2CD2L	PLAUR	SELENOI	CEBPB	TMEM248
H3F3C	ASF1A	C2orf69	PLEKHA5	SELENOS	CEBPD	TMEM92
HBEGF	ASPHD1	C3orf52	PLK3	SERPINE1	CEBPZ	TNFAIP1
HELZ2	ASPHD2	C6orf136	PNRC1	SERTAD1	CELF1	TNFRSF10A
HERC4	ASTE1	C6orf223	POLR2A	SESN2	CENPA	TNFRSF10B
HES1	ASTN2	C7orf26	POLR2B	SGTB	CEP350	TNFRSF12A
HHEX	ASXL2	C8orf58	POPDC3	SH2B3	CEP76	TNFSF9
HIPK1	ATAD1	C8orf76	PPM1A	SH3BP2	CEP85	TOB2
HIPK2	ATF3	CA12	PPM1B	SIN3A	CEP85L	TOMM70
HIPK3	ATF5	CAB39	PPP2CB	SKIL	CFLAR	TOR1A
HK2	ATF6	CABLES1	PPP2R1B	SLC26A11	CHAC1	TRABD2A
HLA-E	ATF7IP	CACHD1	PPP2R5B	SLC2A1	CHD8	TRIM8
HMBOX1	ATF7IP2	CACYBP	PPP4R2	SLC30A7	CHIC2	TRIML2
HMGCR	ATG101	CACYBPP2	PPT2	SLC36A1	CHMP7	TRIO
HMGCS1	ATG13	CALHM2	PPTC7	SLC37A3	CHORDC1	TSC22D2
HMGN3	ATG14	CAMSAP1	PRAG1	SLC43A2	CHRNA5	TSPAN14
HMGXB4	ATG16L1	CAMSAP3	PRKCD	SLC6A10P	CHRNA7	TTK
HMOX1	ATG2A	CAPN12	PRKCH	SLC7A6	CHST11	TUBB2A
HSPA13	ATG4A	CARMIL1	PRSS8	SLC9A1	CHST12	TUBB6
HSPE1	ATL2	CARMIL2	PSD3	SMAD7	CHST7	TXNL1
HSPE1-MOB4	ATOX1	CASKIN2	PSEN2	SNAI1	CHSY1	TYW3
HSPE1P6	ATP5MF-PTCD1	CASP10	PSMG2	SNIP1	CITED2	UAP1
ID2	ATP6V0E1	CASP4	PTP4A2P2	SNX4	CKS2	UBASH3B
IER2	ATP6V1B2	CASP8	QKI	SNX9	CLDN23	UBE2A
IFFO2	ATP6V1H	CASP9	RAB22A	SP100	CLDN4	UBE2B
IFI30	ATP8B1	CASZ1	RAB5B	SPAG9	CLMP	UBR1
IFNAR1	ATP8B3	CATSPERB	RAB5IF	SPINDOC	CLN8	UBTD2
IFNGR2	ATP8B5P	CAV1	RAD1	SPRY2	CLPX	UNC50
IFRD1	ATXN1	CBFA2T3	RALGAPB	SPSB1	CMIP	UPP1
IGF2R	ATXN1L	CBLL1	RAP1B	SRPRB	CMTM3	USP47
IGSF3	ATXN2	CBX2	RASA2	STK38	CNEP1R1	USP53
IL13RA1	ATXN3	CBX4	RASAL2	STXBP5	CNN3	VCL
ILK	ATXN7	CBX5	RBM19	SYNJ2	CNNM2	VPS37A
ILKAP	AUNIP	CBX8	RBM24	TACC1	CNNM4	VSIR
IMPA1	AURKA	CCDC102A	RBM27	TAF13	CNOT2	VTI1A
INPPL1	AVPI1	CCDC107	RBM38	TAF4	CNOT3	WAC
INSIG2	AZIN2	CCDC117	RBMS1	TAF4B	CNPY2	WDR20
IPMK	B3GALT4	CCDC12	RCL1	TANC1	CNTD2	WDR26
IREB2	B3GNT2	CCDC134	RELB	TAOK1	COIL	WNT7B
ISCA2	B3GNT3	CCDC32	RESF1	TASOR2	COMT	YPEL5
ISCU	B3GNT4	CCDC43	RGS14	TBC1D12	COQ10B	YRDC
ITCH	B3GNT5	CCDC50	RHEB	TBPL1	CORO7-PAM16	ZC3H15
ITGA2	B3GNT7	CCDC59	RHOF	TBX18	COX10	ZFAND3
ITGA3	B3GNTL1	CCDC71	RHPN2	TEX10	COX6B2	ZFAND5
ITGA5	B4GALT3	CCDC88C	RIC1	TIPARP	CPA4	ZNF706
ITGA6	B4GALT4	CCL26	RIOK1	TJP1	CPEB4	ZYX
ITGB4	B9D2	CCM2	RMND5A	TLK1	CPTP
ITPKC	BACH1	CCN1	RNA5SP202	TMED7-TICAM2	CRB3
JAZF1	BAG2	CCN2	RNF216	TMEM185B	CREB1
JMJD1C	BAG3	CCNE1	RNF38	TMEM248	CREBBP
JUNB	BAG4	CCNE2	RNFT1	TMEM92	CRIM1
KCNK1	BAHD1	CCNG1	RNU6-9	TNFAIP1	CRK
KCTD15	BAIAP2	CCNG2	SACM1L	TNFRSF10A	CRKL
KCTD2	BAIAP2L1	CCR10	SACS	TNFRSF10B	CRNKL1
KDM2A	BAK1	CCSER2	SASH1	TNFRSF12A	CRY1
KDM5B	BAMBI	CD27-AS1	SBDS	TNFSF9	CRY2
KDM6B	BATF3	CD2AP	SBNO2	TNS4	CSF1
KIAA0355	BAZ1A	CD40	SCAMP2	TOB2	CSK
KIAA1217	BAZ2A	CD47	SCYL1	TOMM70	CSNK1A1
KIAA2026	BAZ2B	CD55	SDC4	TOR1A	CSNK1D
KIF21A	BBC3	CD58	SDCBP	TRABD2A	CSNK1E
KIF2A	BBS12	CDA	SDE2	TRIM8	CSNK1G1
KIF3B	BCAR1	CDC123	SDF2	TRIML2	CSNK1G3
KLC2	BCAR3	CDC25B	SEC24A	TRIO	CSRNP2
KLF10	BCAS2	CDC27	SEC24B	TSC22D2	CSTF2
KLF2	BCL10	CDC34	SEC24D	TSPAN14	CSTF3
KLF5	BCL2L11	CDC37L1	SECISBP2L	TTK	CTDP1
KLHL21	BCL2L13	CDC42SE1	SELENOI	TUBB2A	CTDSP2
KLK10	BCL3	CDC5L	SELENOS	TUBB6	CTH
KLK6	BCL6	CDC73	SERPINE1	TXNL1	CTNS
KMT2E	BCL9L	CDCA2	SERTAD1	TYW3	CTPS1
KPNA2	BCORL1	CDIP1	SESN2	UAP1	CTSC
KPNA4	BDH1	CDK12	SGTB	UBASH3B	CTU1
KPNA5	BDNF	CDK17	SH2B3	UBE2A	CUL1
KRAS	BFAR	CDK18	SH3BP2	UBE2B	CWC22
KRT15	BFSP1	CDK5R2	SIN3A	UBR1	CXorf40A
KRT18	BHLHE40	CDK7	SKIL	UBTD2	CXorf40B
KRT8P3	BIK	CDK8	SLC20A2	UNC50	CXXC5
LAMB3	BIN3	CDK9	SLC26A11	UPP1	CYCSP27
LAMC2	BIRC7	CDKN1A	SLC2A1	USP47	CYCSP55
LAMTOR5	BLCAP	CDKN1B	SLC30A7	USP53	CYTH1
LBR	BLOC1S4	CDKN2B	SLC37A3	UTP20	CYTH2
LDB1	BLZF1	CDR2	SLC3A2	VCL	DACT3
LDLR	BMP4	CDR2L	SLC43A2	VPS37A	DAGLB
LEMD3	BMP7	CDV3	SLC6A10P	VSIR	DAPK3
LEO1	BMPR1A	CDX2	SLC7A11	VTI1A	DAXX
LEPROT	BMPR2	CDYL	SLC9A1	WAC	DBR1
LETM2	BMS1	CEBPA	SMAD7	WDR20	DCAF12
LGALS1	BOC	CEBPB	SNAI1	WDR26	DCP1A
LIF	BOLA1	CEBPD	SNIP1	WNT7B	DDIT3
LIFR	BRD2	CEBPG	SNX4	WTIP	DDIT4
LIG4	BRD4	CEBPZ	SNX9	YPEL5	DDX28
LIMA1	BRIX1	CELF1	SP100	YRDC	DDX56
LIN54	BRMS1L	CENPA	SPINDOC	ZBTB4	DDX58
LINC00659	BRWD3	CEP350	SPRY2	ZC3H15	DDX59
LINC02693	BSDC1	CEP76	SPSB1	ZFAND3	DEDD2
LIPH	BTAF1	CEP85	SRSF6	ZFAND5	DEGS1
LMBR1L	BTBD10	CEP85L	STRN3	ZNF655	DENND2C
LMBRD1	BTG1	CERS4	STXBP5	ZNF706	DENND3
LMX1B	BTG2	CFLAR	SUCO	ZYX	DENND5A
LRCH1	BTN2A2	CHAC1	SYNJ2		DEPDC7
LRCH3	BTN3A1	CHD8	SYNRG		DGAT2
LRP4	BTN3A2	CHIC2	TACC1		DGCR11
LRP5	BTRC	CHKA	TAF13		DGKA
LRP6	BUD13	CHMP7	TAF1B		DGKE
LRPAP1	BX927194.1	CHORDC1	TAF4		DHX30
LRRC37A	BYSL	CHRNA5	TAF4B		DHX32
LRRC37A2	C11orf68	CHRNA7	TANC1		DIMT1
LSM1	C11orf98	CHST11	TAOK1		DIP2B
LSM8	C12orf29	CHST12	TASOR2		DIPK1A
LYN	C12orf43	CHST7	TBC1D12		DIS3
MACF1	C12orf45	CHSY1	TBPL1		DISC1FP1
MAFF	C12orf65	CHUK	TBX18		DKK1
MAFG	C14orf119	CITED2	TEP1		DLG4
MAP1LC3B	C15orf39	CITED4	TEX10		DLGAP4
MAP1LC3B2	C16orf70	CKAP5	THBS1		DLK2
MAP2K1	C16orf72	CKS2	TINAGL1		DNAH14
MAP2K3	C16orf91	CLASP2	TIPARP		DNAJA1
MAP3K2	C17orf53	CLCN2	TJP1		DNAJA2
MAP3K7	C17orf67	CLDN23	TMED7-TICAM2		DNAJA3
MAP4K3	C17orf80	CLDN4	TMEM248		DNAJA4
MAPK6	C18orf21	CLMP	TMEM41B		DNAJB1
MAPKAP1	C18orf25	CLN8	TMEM50A		DNAJB4
MAPKAPK2	C19orf47	CLPX	TMEM92		DNAJB5
MAPRE1	C1GALT1	CMIP	TNFAIP1		DNAJB9
MARK2	C1orf116	CMTM3	TNFRSF10A		DNAJC1
MARK4	C1orf52	CNEP1R1	TNFRSF10B		DNAJC12
MBD2	C1orf54	CNN3	TNFRSF12A		DNAJC22
MBD6	C1QTNF1	CNNM2	TNFSF9		DNAJC24
MBIP	C1QTNF6	CNNM4	TOB2		DNAJC3
MCAM	C21orf91-OT1	CNOT2	TOMM70		DNAJC30
MED1	C2CD2L	CNOT3	TOR1A		DNMT3B
MED13	C2orf27A	CNPY2	TRABD2A		DNTTIP2
MED17	C2orf49	CNTD2	TRAPPC4		DOHH
MED28	C2orf88	COIL	TRIM8		DOLK
MED31	C3orf38	COMT	TRIML2		DPEP1
MED4	C3orf52	COP1	TRIO		DPF2
MEF2A	C5AR1	COQ10B	TSC22D2		DSE
MEGF9	C5orf24	CORO7-PAM16	TSPAN14		DTWD1
METRNL	C5orf51	COX10	TTK		DTX2
MEX3C	C6orf136	COX6B2	TUBB2A		DUS2
MFAP2	C6orf141	CPA4	TUBB6		DUSP1
MFSD14B	C6orf223	CPEB3	TVP23B		DUSP11
MFSD9	C6orf47	CPEB4	TVP23C		DUSP14
MICB	C7orf26	CPTP	TXLNG		DUSP16
MIER1	C7orf61	CRB3	TXNL1		DUSP2
MINDY3	C8orf58	CREB1	TYW3		DUSP4
MINK1	C8orf76	CREB3L2	UAP1		DUSP5
MIR21	C9orf72	CREBBP	UBASH3B		DUSP7
MIR4435-2HG	CA12	CRIM1	UBE2A		DUSP8
MIR6516	CA13	CRK	UBE2B		DVL2
MIR6751	CA2	CRKL	UBE2G1		DYNC1LI1
MIR6820	CAB39	CRLF3	UBE2Z		DYRK1A
MISP	CABLES1	CRNKL1	UBR1		DYRK2
MKLN1	CACHD1	CRY1	UBTD2		DYRK3
MKNK2	CACNB1	CRY2	UNC50		EAPP
MLLT6	CACYBPP2	CSF1	UPP1		EBI3
MND1	CALHM2	CSK	USP24		ECD
MOB1B	CALM2	CSNK1A1	USP32		ECM1
MOCS2	CAMLG	CSNK1D	USP47		EDRF1
MON1A	CAMSAP2	CSNK1E	USP53		EEF1AKMT4
MORC3	CAMSAP3	CSNK1G1	VASP		EEF1AKNMT
MOSPD1	CAP2	CSNK1G3	VCAN		EFNA4
MRPL22	CAPN12	CSNK2A3	VCL		EFNB1
MRPL39	CAPS2	CSRNP2	VPS37A		EFNB2
MSL1	CARD10	CSTF2	VSIR		EGFR
MSLN	CARMIL2	CSTF3	VTI1A		EGLN3
MSRB1	CASKIN2	CTDP1	WAC		EHD1
MSTO2P	CASP10	CTDSP2	WDR20		EHD2
MSX1	CASP3	CTH	WDR26		EIF1AD
MT1X	CASP4	CTNS	WDR45		EIF1P3
MTF2	CASP7	CTPS1	WNT7B		EIF4A3
MTM1	CASP8	CTSC	YOD1		EIF4ENIF1
MTMR12	CASP9	CTU1	YPEL5		ELAC1
MTMR6	CATSPER1	CUL1	YRDC		ELF1
MYADM	CAV1	CWC22	ZC3H15		ELK1
MYBL1	CBFA2T2	CXorf40A	ZFAND3		ELL
MYEOV	CBX4	CXorf40B	ZFAND5		ELOA
MYL9	CBX5	CXXC5	ZNF697		ELOF1
MYO1B	CBX8	CYCSP27	ZNF706		ELOVL3
N6AMT1	CC2D1B	CYCSP55	ZRANB2		ELOVL5
NABP1	CCDC102A	CYTH1	ZYX		ELP4
NAGK	CCDC107	CYTH2			EMC2
NAMPT	CCDC117	CYTOR			EMC7
NAMPTP1	CCDC12	DACT3			EMILIN2
NBN	CCDC126	DAGLB			EMP1
NCEH1	CCDC134	DAPK3			ENTPD1-AS1
NCKAP1	CCDC186	DAXX			ENTPD7
NCOA3	CCDC28B	DBR1			EPB41L5
NCOA6	CCDC32	DCAF12			EPC2
NCSTN	CCDC51	DCBLD1			EPHA2
NDEL1	CCDC59	DCP1A			EPHB3
NDFIP1	CCDC71	DDIT3			EPN2
NDFIP2	CCDC71L	DDIT4			EPOP
NDRG1	CCDC86	DDN-AS1			EPOR
NECAP2	CCDC90B	DDRGK1			EPS15L1
NEDD4	CCL26	DDX24			EPS8
NEDD4L	CCN1	DDX28			EPS8L1
NEO1	CCN2	DDX56			ERCC1
NETO2	CCNC	DDX58			ERCC6
NEU1	CCNE2	DDX59			ERLIN1
NFE2L3	CCNG1	DEDD2			ERRFI1
NFKB2	CCNG2	DEGS1			ESCO1
NFKBIE	CCNH	DENND2C			ESF1
NGFR	CCNJL	DENND3			ESS2
NHLRC2	CCNO	DENND5A			ETS1
NINL	CCR10	DENND5B			ETV3
NIPA1	CCS	DEPDC7			ETV5
NOP16	CCSAP	DEPP1			EVA1C
NOTCH2NLA	CCSER2	DGAT2			EXO1
NOTCH2NLB	CD22	DGCR11			EXOC8
NOTCH2NLC	CD2AP	DGKA			EXOSC3
NPAS2	CD2BP2	DGKD			EXOSC4
NPC1	CD33	DGKE			EXT1
NPEPPS	CD40	DHRSX			F3
NPTN	CD55	DHX30			F8A1
NR1H2	CD58	DHX32			F8A3
NR4A1	CDA	DIMT1			FADD
NTN1	CDC123	DIP2A			FAM104A
NUDT4	CDC25A	DIP2B			FAM117A
NUFIP2	CDC34	DIPK1A			FAM126A
NUP98	CDC37L1	DIPK1B			FAM131A
ORMDL3	CDC42EP1	DIS3			FAM135A
OSBP	CDC42EP3	DISC1FP1			FAM149A
OSBPL2	CDC42EP5	DKK1			FAM160A1
OSBPL9	CDC42SE1	DLAT			FAM160B1
OSGIN1	CDC5L	DLG4			FAM169A
OXR1	CDC73	DLGAP4			FAM174A
P3H1	CDCP1	DLK2			FAM184A
PAIP1	CDIP1	DMWD			FAM207A
PANK3	CDK12	DNAH14			FAM207CP
PANX1	CDK13	DNAJA1			FAM210A
PAQR5	CDK17	DNAJA2			FAM214B
PARD6B	CDK18	DNAJA3			FAM216A
PARP12	CDK5R1	DNAJA4			FAM219A
PARP2	CDK7	DNAJB1			FAM222B
PBDC1	CDK8	DNAJB4			FAM241B
PCGF2	CDK9	DNAJB5			FAM43A
PCTP	CDKL1	DNAJB9			FAM47E-STBD1
PDCD10	CDKN1A	DNAJC1			FAM83D
PDE6D	CDKN1B	DNAJC12			FAM86HP
PDGFA	CDKN2B	DNAJC22			FAM86KP
PDGFB	CDR2	DNAJC24			FANCL
PDLIM3	CDR2L	DNAJC3			FARS2
PDLIM7	CDV3	DNAJC30			FASTKD3
PEA15	CDX2	DNMT3B			FAXC
PEX14	CDYL	DNTTIP2			FBXL12
PGM2L1	CEBPA	DOCK9			FBXL3
PGM3	CEBPB	DOHH			FBXL5
PHACTR2	CEBPD	DOLK			FBXO11
PHETA1	CEBPZ	DOT1L			FBXO22
PIAS1	CECR2	DPEP1			FBXO30
PIAS4	CELF1	DPF2			FBXO32
PIGG	CEMIP2	DSE			FBXO34
PIKFYVE	CENPA	DTWD1			FBXO36
PIP4K2C	CENPC	DTX2			FBXO46
PIP4P1	CEP350	DUS2			FBXO8
PLAGL2	CEP68	DUSP1			FBXW7
PLAT	CEP76	DUSP11			FEM1A
PLAUR	CEP85	DUSP14			FEM1C
PLEKHA5	CEP85L	DUSP16			FERMT2
PLK3	CERS5	DUSP2			FGD4
PLOD2	CFAP20	DUSP4			FGD6
PNRC1	CFLAR	DUSP5			FGF18
POLR2A	CGB5	DUSP7			FGF2
POLR2B	CGB8	DUSP8			FGFBP1
POLR2J	CGN	DVL2			FGFR1OP
POLR2K	CGRRF1	DYNC1LI1			FHL2
POPDC3	CHAC1	DYRK1A			FJX1
PPARG	CHCHD7	DYRK2			FKBP15
PPIH	CHD1	DYRK3			FKRP
PPM1A	CHD7	E2F7			FLYWCH1
PPM1B	CHD8	EAPP			FNDC3A
PPP1R13L	CHD9	EBI3			FNDC3B
PPP1R26	CHIC2	ECD			FNIP1
PPP1R9B	CHMP1B	ECM1			FOSL1
PPP2CB	CHMP7	EDRF1			FOXN2
PPP2R1B	CHORDC1	EEF1AKMT4			FOXO1
PPP2R5B	CHRFAM7A	EEF1AKNMT			FP565260.1
PPP3R1	CHRNA5	EFNA4			FRAT2
PPP4R2	CHRNA7	EFNB1			FRK
PPP6R3	CHST11	EFNB2			FRMD5
PPT2	CHST12	EGFR			FRMD8
PPTC7	CHST15	EGLN3			FRS2
PRAG1	CHST7	EHD1			FUT11
PRKCD	CHSY1	EHD2			FUT4
PRKCH	CHTOP	EHMT1			FUT8
PRKD3	CIR1	EIF1AD			FXR1
PRR12	CITED2	EIF1P3			FXR2
PRRC1	CKS2	EIF4A3			FZD1
PRSS8	CLASP1	EIF4ENIF1			FZD2
PSD3	CLCC1	ELAC1			FZD3
PSEN2	CLCF1	ELF1			FZD7
PSMG2	CLCN1	ELK1			FZR1
PTP4A2P2	CLDN23	ELL			GAD1
PTPRA	CLDN4	ELOA			GALNT5
PTPRJ	CLIC3	ELOF1			GAN
PTPRK	CLIP4	ELOVL3			GAR1
PTS	CLK1	ELOVL5			GAREM1
QKI	CLK3	ELP4			GATA2
RAB11A	CLMP	EMC2			GATA6
RAB14	CLN8	EMC6			GCLM
RAB18	CLNS1A	EMC7			GDF15
RAB22A	CLP1	EMILIN2			GDPD1
RAB5B	CLPX	EML2-AS1			GEM
RAB5IF	CLU	EMP1			GEMIN2
RABGGTB	CLUAP1	ENTPD1-AS1			GEMIN4
RABL3	CMIP	ENTPD7			GEMIN5
RAD1	CMTM3	EPB41L5			GEMIN6
RAD21	CMTR1	EPC2			GEMIN7
RALGAPB	CMTR2	EPHA2			GFM2
RAP1B	CNEP1R1	EPHB3			GFOD1
RAPGEF5	CNIH4	EPHX4			GFOD2
RASA2	CNKSR3	EPN2			GIPR
RASAL2	CNN3	EPOP			GIT2
RBL1	CNNM2	EPOR			GJB3
RBM19	CNNM4	EPS15L1			GJB5
RBM24	CNOT2	EPS8			GJC1
RBM27	CNOT3	EPS8L1			GLA
RBM38	CNOT4	ERCC1			GLIS2
RBMS1	CNOT6L	ERCC6			GLIS3
RBP1	CNOT8	ERLEC1			GLMN
RCL1	CNP	ERLIN1			GLRX2
RELB	CNPPD1	ERRFI1			GLUL
RESF1	CNPY2	ESCO1			GNA13
RGS14	CNST	ESF1			GNAI1
RHEB	CNTD2	ESS2			GNE
RHOF	COCH	ETS1			GOLGA5
RHOT1	COG2	ETV3			GOLGA7B
RHPN2	COIL	ETV5			GOLPH3
RIC1	COMMD3-BMI1	EVA1C			GOLPH3L
RIOK1	COMT	EVI5L			GORASP2
RMND5A	COPS2	EVPL			GOSR1
RNA5SP202	COQ10A	EXO1			GOSR2
RNF11	COQ10B	EXOC8			GPAT3
RNF145	COQ8A	EXOSC10			GPATCH3
RNF216	CORO2A	EXOSC3			GPBP1
RNF220	CORO7-PAM16	EXOSC4			GPN2
RNF38	COX10	EXT1			GPR157
RNFT1	COX10-AS1	F3			GPR180
RNU6-2	COX6B2	F8A1			GPR39
RNU6-33P	CPA4	F8A3			GPR89A
RNU6-36P	CPEB4	FADD			GPR89B
RNU6-3P	CPM	FAM102A			GPRC5A
RNU6-4P	CPT2	FAM104A			GPRC5C
RNU6-5P	CPTP	FAM117A			GPX8
RNU6-6P	CR759747.1	FAM126A			GRAMD1A
RNU6-7	CR936875.1	FAM131A			GRAMD1B
RNU6-9	CRABP2	FAM135A			GRAMD2B
RPS6KA3	CRB3	FAM149A			GRB10
RRAS	CREB1	FAM160A1			GRIN2D
RTEL1-TNFRSF6B	CREBBP	FAM160B1			GRPEL1
S100A11	CREBRF	FAM169A			GRWD1
SACM1L	CREM	FAM174A			GSK3B
SACS	CRIM1	FAM184A			GTF2B
SASH1	CRISPLD2	FAM207A			GTF2E1
SASS6	CRK	FAM207CP			GTF2E2
SBDS	CRKL	FAM20C			GTF2H2
SBF1	CRNKL1	FAM210A			GTF2H2B
SBF2	CRY1	FAM214B			GTF2H2C
SBNO1	CRY2	FAM216A			GTF3C4
SBNO2	CSF1	FAM219A			GTF3C5
SCAMP2	CSF2RA	FAM222B			GTPBP8
SCML1	CSK	FAM241B			GXYLT1
SCYL1	CSNK1A1	FAM43A			H3F3B
SCYL2	CSNK1D	FAM47E-STBD1			H3F3C
SDC4	CSNK1E	FAM83D			HAUS8
SDCBP	CSNK1G1	FAM86HP			HBEGF
SDE2	CSNK1G3	FAM86KP			HBP1
SDF2	CSNK2A2	FANCL			HCCS
SEC23A	CSRNP2	FARS2			HCP5
SEC24A	CSTF1	FASTKD3			HDHD3
SEC24B	CSTF2	FAXC			HECA
SEC24D	CSTF3	FBRSL1			HERC4
SECISBP2L	CTAGE9	FBXL12			HERPUD1
SELENOI	CTBP2	FBXL3			HIF1A
SELENOS	CTDP1	FBXL5			HIP1R
SEPTIN6	CTDSP2	FBXO11			HIPK3
SEPTIN7P3	CTH	FBXO22			HIST1H2AC
SERPINE1	CTNND1	FBXO30			HIST1H2BD
SERTAD1	CTNS	FBXO32			HIST1H3E
SESN2	CTPS1	FBXO34			HIST2H4A
SETX	CTSC	FBXO36			HIST2H4B
SFSWAP	CTSL	FBXO46			HK2
SGPL1	CTTNBP2NL	FBXO5			HMGCR
SGTB	CTU1	FBXO8			HMGCS1
SH2B3	CUL1	FBXW11			HMGXB3
SH3BP2	CWC22	FBXW7			HMOX1
SH3TC1	CXorf40A	FEM1A			HMOX2
SHROOM1	CXorf40B	FEM1C			HNF4A
SIN3A	CXXC5	FER			HOMER1
SKIL	CYB561D2	FERMT2			HOMEZ
SLBP	CYB5R1	FGD4			HOXB9
SLC20A2	CYBRD1	FGD6			HOXC13
SLC25A12	CYCSP27	FGF18			HPS5
SLC26A11	CYCSP55	FGF2			HPS6
SLC2A1	CYP27B1	FGFBP1			HS3ST1
SLC30A7	CYP2S1	FGFBP2			HSF2
SLC36A1	CYP2U1	FGFR1OP			HSPA13
SLC37A3	CYP4F11	FGFR2			HSPA1B
SLC3A2	CYREN	FGFRL1			HSPA2
SLC43A2	CYTH1	FHL2			HSPA5
SLC4A7	CYTH2	FJX1			HSPA8P7
SLC6A10P	CYTH4	FKBP14			HSPH1
SLC7A11	DAAM1	FKBP15			HTR1D
SLC7A6	DAB2	FKRP			HYAL1
SLC9A1	DACT3	FLT3LG			HYAL2
SMAD7	DAGLB	FLYWCH1			ICAM1
SMIM29	DAPK3	FNDC3A			IER5
SNAI1	DAXX	FNDC3B			IFFO2
SNIP1	DBNDD2	FNIP1			IFI35
SNORD3B-1	DBR1	FOSL1			IFNGR1
SNX12	DCAF12	FOXK2			IFRD1
SNX25	DCAF15	FOXN2			IFT46
SNX3	DCAF5	FOXN3			IL18
SNX30	DCLRE1B	FOXO1			IL4R
SNX4	DCP1A	FOXO6			ING1
SNX9	DCP1B	FP565260.1			INSIG1
SP100	DCUN1D1	FRAT2			INSIG2
SPAG9	DCUN1D3	FRK			INTS10
SPC25	DDIT3	FRMD5			INTS12
SPECC1	DDIT4	FRMD8			IP6K2
SPINDOC	DDX20	FRS2			IQCJ-SCHIP1
SPINT1	DDX28	FUT11			IRAK2
SPIRE2	DDX42	FUT4			IREB2
SPPL2A	DDX52	FUT8			IRF1
SPRY2	DDX56	FXN			IRF2BP2
SPRY4	DDX58	FXR1			IRS1
SPSB1	DDX59	FXR2			IRS2
SRPRB	DEDD	FZD1			IRX5
SRSF6	DEDD2	FZD2			ISCA2
ST14	DEGS1	FZD3			IST1
STK24	DENND2C	FZD7			ITCH
STK38	DENND3	FZD9			ITGA2
STRN3	DENND5A	FZR1			ITGA5
STXBP5	DEPDC7	GABRD			ITPKC
SUCO	DERL2	GABRQ			IVNS1ABP
SYNJ2	DES	GAD1			JAGN1
SYNRG	DESI1	GALNT14			JMJD1C
TACC1	DGAT2	GALNT5			JMJD6
TAF13	DGCR11	GAN			JOSD1
TAF1B	DGKA	GAR1			JRKL
TAF4	DGKE	GAREM1			JUN
TAF4B	DGKG	GAREM2			KALRN
TANC1	DHRS13	GATA2			KANSL2
TAOK1	DHRS7	GATA6			KATNB1
TAP1	DHX30	GBF1			KATNBL1
TASOR2	DHX32	GCFC2			KCNG1
TBC1D12	DHX36	GCLM			KCNK1
TBC1D13	DHX8	GDF15			KCNK13
TBC1D14	DIMT1	GDPD1			KCNK6
TBPL1	DIP2B	GEM			KCTD1
TBX18	DIPK1A	GEMIN2			KCTD14
TDG	DIPK2A	GEMIN4			KCTD5
TEP1	DIS3	GEMIN5			KDM2A
TEX10	DISC1FP1	GEMIN6			KDM3A
TGFB1	DISP1	GEMIN7			KDM5B
TGFBR1	DKK1	GFM2			KDM6A
THBS1	DLG4	GFOD1			KDM6B
THSD1	DLGAP4	GFOD2			KDSR
TIMP1	DLK2	GFPT2			KEAP1
TIMP2	DLX2	GIPR			KHDC1
TINAGL1	DMTF1	GIT2			KHDC4
TIPARP	DNAAF2	GJB3			KIAA0513
TJP1	DNAH14	GJB5			KIAA1217
TLK1	DNAH17-AS1	GJC1			KIF1B
TM9SF2	DNAJA1	GLA			KIF5A
TMED7-TICAM2	DNAJA2	GLI2			KIRREL2
TMEM128	DNAJA3	GLIS2			KLC1
TMEM167B	DNAJA4	GLIS3			KLF2
TMEM185B	DNAJB1	GLMN			KLF3
TMEM248	DNAJB14	GLRX			KLF4
TMEM41B	DNAJB4	GLRX2			KLF5
TMEM50A	DNAJB5	GLUL			KLF9
TMEM92	DNAJB9	GNA12			KLHDC10
TMEM98	DNAJC1	GNA13			KLHL26
TMSB10	DNAJC12	GNAI1			KLHL36
TMTC3	DNAJC16	GNE			KMT5B
TNFAIP1	DNAJC18	GNG7			KNSTRN
TNFRSF10A	DNAJC2	GOLGA5			KPNA2
TNFRSF10B	DNAJC22	GOLGA7B			KPNA4
TNFRSF10D	DNAJC24	GOLPH3			KRAS
TNFRSF12A	DNAJC3	GOLPH3L			KRCC1
TNFSF9	DNAJC30	GORASP2			KRT7
TNKS2	DNASE1	GOSR1			KRT80
TNS4	DNMT3B	GOSR2			KRTAP2-3
TOB2	DNTTIP1	GPALPP1			LAD1
TOMM40L	DNTTIP2	GPAT3			LAMB3
TOMM70	DOHH	GPATCH2L			LANCL2
TOPBP1	DOK1	GPATCH3			LARP4B
TOR1A	DOK4	GPBP1			LATS2
TPM4	DOLK	GPCPD1			LCA5
TPMT	DPEP1	GPN2			LCAT
TRABD2A	DPF2	GPR137B			LDB1
TRAPPC10	DR1	GPR157			LDLR
TRAPPC4	DRAM2	GPR180			LENG1
TRIM8	DSE	GPR39			LENG9
TRIML2	DSTYK	GPR89A			LETM1
TRIO	DTL	GPR89B			LETM2
TSC22D2	DTWD1	GPRC5A			LGMN
TSNAX	DTX2	GPRC5B			LHX2
TSPAN14	DTX3L	GPRC5C			LIG4
TSTA3	DUOXA1	GPX8			LIMA1
TTK	DUS2	GRAMD1A			LIN54
TUBB2A	DUSP1	GRAMD1B			LINC00973
TUBB6	DUSP11	GRAMD2B			LINC01273
TUBGCP3	DUSP14	GRB10			LINC01338
TVP23B	DUSP16	GREB1L			LINC01405
TVP23C	DUSP2	GRID1			LINC02273
TXLNG	DUSP4	GRIN2D			LINC02323
TXNL1	DUSP5	GRK5			LINC02608
TYW3	DUSP7	GRM4			LIPH
UAP1	DUSP8	GRPEL1			LIPT1
UBA2	DVL2	GRWD1			LMAN2L
UBASH3B	DYNC1LI1	GSEC			LMBR1
UBE2A	DYNLL1	GSK3B			LMBR1L
UBE2B	DYNLT1	GTF2B			LMCD1
UBE2G1	DYRK1A	GTF2E1			LMO4
UBE2Z	DYRK2	GTF2E2			LMX1B
UBL3	DYRK3	GTF2H2			LPAR1
UBR1	E2F5	GTF2H2B			LPAR5
UBTD2	E2F6	GTF2H2C			LPP
UNC119	EAPP	GTF3C4			LRCH1
UNC50	EBI3	GTF3C5			LRCH3
UPP1	ECD	GTPBP8			LRFN3
USP24	ECM1	GXYLT1			LRIG3
USP32	ECPAS	H3F3B			LRP4-AS1
USP33	EDEM3	H3F3C			LRP6
USP47	EDRF1	HAUS8			LRRC3
USP53	EEA1	HBEGF			LRRC41
UTP20	EED	HBP1			LRRC42
VASP	EEF1AKMT4	HCCS			LRRC59
VCAN	EEF1AKNMT	HCP5			LRRC8A
VCL	EEF1E1	HDHD3			LRRC8C
VEZF1	EEPD1	HECA			LRRFIP2
VGF	EFNA1	HERC4			LSM10
VPS13A	EFNA4	HERPUD1			LTBR
VPS13D	EFNB1	HES4			LTV1
VPS37A	EFNB2	HIC2			LYPLA2
VPS54	EGFR	HIF1A			LZTS2
VSIR	EGLN2	HIP1R			MACO1
VTI1A	EGLN3	HIPK3			MAD2L1BP
WAC	EHD1	HIST1H2AC			MAFA
WBP11	EHD2	HIST1H2BD			MAFG-DT
WDR20	EIF1	HIST1H3E			MAGEA2
WDR26	EIF1AD	HIST2H2BD			MAGEA2B
WDR45	EIF1B	HIST2H4A			MANEAL
WNT7B	EIF1P3	HIST2H4B			MAP1LC3B2
WRAP73	EIF4A3	HK2			MAP1S
WTIP	EIF4ENIF1	HKDC1			MAP2K1
WWC1	ELAC1	HMBOX1			MAP2K3
YOD1	ELF1	HMGCR			MAP2K4
YPEL5	ELF2	HMGCS1			MAP3K2
YRDC	ELF4	HMGXB3			MAP3K20
ZBTB38	ELK1	HMOX1			MAP3K3
ZBTB4	ELL	HMOX2			MAP3K7
ZC3H15	ELOA	HNF4A			MAP3K8
ZFAND3	ELOF1	HOMER1			MAP3K9
ZFAND5	ELOVL1	HOMEZ			MAP7D1
ZFYVE21	ELOVL3	HOXB6			MAPK8IP2
ZHX1	ELOVL5	HOXB9			MARK2
ZNF503	ELOVL6	HOXC13			MARK3
ZNF655	ELP4	HOXD8			MAST2
ZNF697	EMC2	HPS5			MAST3
ZNF706	EMC7	HPS6			MAX
ZRANB2	EMG1	HRK			MBIP
ZYX	EMILIN2	HS3ST1			MBLAC1
	EMP1	HSBP1L1			MBNL2
	ENAH	HSD17B12			MBOAT1
	ENPP4	HSF2			MCC
	ENTPD1-AS1	HSPA13			MCMBP
	ENTPD7	HSPA1B			MDFI
	EOMES	HSPA2			MED13
	EPB41L4B	HSPA4L			MED15
	EPB41L5	HSPA5			MED17
	EPC2	HSPA8P7			MED19
	EPDR1	HSPA9			MED21
	EPHA2	HSPH1			MED6
	EPHB3	HTR1D			MED8
	EPN2	HYAL1			MEF2D
	EPN3	HYAL2			METRNL
	EPOP	HYLS1			MFAP3L
	EPOR	ICAM1			MFSD12
	EPS15L1	ID3			MFSD2A
	EPS8	IER5			MFSD5
	EPS8L1	IFFO2			MFSD9
	EPS8L2	IFI35			MGAT1
	ERAL1	IFNGR1			MGAT2
	ERBIN	IFRD1			MGLL
	ERCC1	IFT46			MIA2
	ERCC3	IL17RB			MICA
	ERCC6	IL18			MICB
	EREG	IL4R			MIEF2
	ERFL	ING1			MIER1
	ERICH5	INKA1			MIER2
	ERLIN1	INO80C			MIR1909
	ERRFI1	INPP4A			MIR3658
	ESCO1	INPP5F			MIR4800
	ESF1	INSIG1			MIR6751
	ESRRA	INSIG2			MIR6881
	ESS2	INTS10			MISP
	ETS1	INTS12			MKNK2
	ETS2	IP6K2			MKRN1
	ETV3	IQCJ-SCHIP1			MNT
	ETV5	IRAK2			MNX1-AS1
	EVA1A	IREB2			MOB2
	EVA1B	IRF1			MOB3A
	EVA1C	IRF2BP2			MON1A
	EXO1	IRS1			MORC2
	EXOC8	IRS2			MORC3
	EXOSC3	IRX5			MOSMO
	EXOSC4	ISCA2			MOSPD2
	EXOSC7	ISL2			MPHOSPH10
	EXT1	IST1			MPLKIP
	F2RL1	ITCH			MPP5
	F3	ITGA2			MPV17L2
	F8A1	ITGA5			MPZL1
	F8A3	ITPKC			MPZL2
	FADD	ITPRID2			MR1
	FAF2	ITSN1			MRM1
	FAM104A	IVNS1ABP			MRM3
	FAM110A	JAG1			MRPL14
	FAM110D	JAGN1			MRPL17
	FAM117A	JMJD1C			MRPL32
	FAM117B	JMJD6			MRPL36
	FAM118B	JOSD1			MRPL39
	FAM122A	JRKL			MRPL50
	FAM124A	JUN			MRPL55
	FAM126A	JUND			MRPS30
	FAM131A	KALRN			MRPS35
	FAM135A	KANSL2			MRTFA
	FAM13A	KATNB1			MSMO1
	FAM149A	KATNBL1			MTATP6P2
	FAM160A1	KAZN			MTERF3
	FAM160A2	KBTBD7			MTF1
	FAM160B1	KCMF1			MTF2
	FAM169A	KCNG1			MTFMT
	FAM171B	KCNIP2-AS1			MTFR1
	FAM174A	KCNJ12			MTFR2
	FAM184A	KCNK1			MTND6P3
	FAM207A	KCNK13			MTPAP
	FAM207CP	KCNK6			MUS81
	FAM210A	KCTD1			MYADM
	FAM214B	KCTD14			MYEOV
	FAM216A	KCTD20			MYL9
	FAM217B	KCTD5			MYLIP
	FAM219A	KCTD7			MYO1E
	FAM222B	KDM2A			NAA35
	FAM241B	KDM3A			NABP1
	FAM43A	KDM4B			NACC2
	FAM47E-STBD1	KDM5B			NAF1
	FAM53C	KDM6A			NAV1
	FAM83D	KDM6B			NAV3
	FAM83G	KDSR			NBN
	FAM86C1	KEAP1			NCK1
	FAM86EP	KHDC1			NCK1-DT
	FAM86HP	KHDC4			NCOA6
	FAM86KP	KIAA0513			NDEL1
	FANCF	KIAA0586			NDUFAF4
	FANCL	KIAA1217			NDUFV3
	FANK1	KIAA2013			NECAP2
	FARP2	KIF13A			NECTIN2
	FARS2	KIF18A			NECTIN3
	FASTKD2	KIF1B			NEDD4L
	FASTKD3	KIF5A			NEK3
	FAXC	KIF5B			NELFA
	FBLIM1	KIRREL1			NET1
	FBXL12	KIRREL2			NEU1
	FBXL3	KLC1			NFATC1
	FBXL5	KLF11			NFE2L3
	FBXO11	KLF2			NFIL3
	FBXO22	KLF3			NFKB2
	FBXO28	KLF4			NFKBIA
	FBXO30	KLF5			NFKBIE
	FBXO32	KLF9			NFKBIL1
	FBXO34	KLHDC10			NGFR
	FBXO36	KLHL26			NGLY1
	FBXO38	KLHL29			NINJ1
	FBXO42	KLHL36			NIP7
	FBXO46	KMT5B			NIPAL1
	FBXO6	KMT5C			NIPAL3
	FBXO8	KNSTRN			NIT1
	FBXW7	KPNA2			NKD2
	FCHO2	KPNA4			NKIRAS1
	FCHSD1	KRAS			NKX6-1
	FDFT1	KRCC1			NMI
	FEM1A	KRT7			NOB1
	FEM1B	KRT80			NOCT
	FEM1C	KRTAP2-3			NOLC1
	FERMT1	LAD1			NOP16
	FERMT2	LAMB3			NOTCH2NLA
	FGD1	LANCL2			NOTCH2NLB
	FGD4	LARP4B			NOTCH2NLC
	FGD6	LATS2			NOVA2
	FGF18	LCA5			NPC1
	FGF2	LCAT			NPIPB2
	FGFBP1	LDB1			NR1H2
	FGFR1OP	LDLR			NR2F2
	FHL2	LDLRAP1			NR2F6
	FHL3	LENG1			NR4A1
	FIP1L1	LENG9			NRBF2
	FJX1	LETM1			NRIP1
	FKBP15	LETM2			NSDHL
	FKBPL	LGMN			NSMCE3
	FKRP	LHX2			NT5C1B-RDH14
	FLVCR1	LIG4			NUBP1
	FLYWCH1	LIMA1			NUDCD1
	FLYWCH2	LIN54			NUDT16
	FNDC3A	LINC00973			NUDT4
	FNDC3B	LINC01273			NUDT4B
	FNIP1	LINC01338			NUFIP1
	FNTA	LINC01405			NUMBL
	FOSB	LINC02273			NUP54
	FOSL1	LINC02323			NUP98
	FOXA3	LINC02356			NXT1
	FOXD1	LINC02608			OCEL1
	FOXJ3	LINC02802			OGFR
	FOXN2	LINGO1			ORAI1
	FOXO1	LIPE			ORC2
	FOXO3	LIPH			OSBP
	FOXO3B	LIPT1			OSBPL2
	FP565260.1	LMAN2L			OSBPL9
	FPGS	LMBR1			OSGIN2
	FRAT2	LMBR1L			OSMR
	FRK	LMCD1			OSR2
	FRMD5	LMO4			OTUB2
	FRMD6	LMX1B			OXNAD1
	FRMD8	LNX2			OXSM
	FRS2	LPAR1			OXSR1
	FUBP1	LPAR5			P2RY1
	FUT1	LPP			P2RY2
	FUT10	LRCH1			P4HA1
	FUT11	LRCH3			P4HA2
	FUT4	LRFN3			PACC1
	FUT8	LRFN4			PAFAH1B1
	FUZ	LRIF1			PAG1
	FXR1	LRIG1			PAIP1P1
	FXR2	LRIG3			PAK1IP1
	FXYD5	LRP4-AS1			PAK4
	FZD1	LRP6			PAK6
	FZD2	LRRC3			PALM2-AKAP2
	FZD3	LRRC37A9P			PANX1
	FZD7	LRRC41			PAPOLG
	FZR1	LRRC42			PAX2
	GABARAPL1	LRRC59			PAX9
	GABPB1	LRRC8A			PBDC1
	GAD1	LRRC8C			PCGF1
	GALNT5	LRRFIP2			PCGF2
	GAN	LSM10			PCOLCE2
	GAR1	LSM12P1			PDCD10
	GAREM1	LSP1P4			PDCD2L
	GART	LTBR			PDGFA
	GATA2	LTV1			PDGFB
	GATA6	LYPLA2			PELI1
	GATAD2B	LZTS1			PELO
	GBX2	LZTS2			PER1
	GCC1	MACO1			PER2
	GCC2	MAD2L1BP			PEX11A
	GCH1	MAFA			PEX13
	GCLC	MAFG-DT			PEX14
	GCLM	MAGEA2			PFKFB3
	GCNT1	MAGEA2B			PGF
	GDF15	MAML1			PGM2L1
	GDPD1	MAN1A1			PHC2
	GEM	MANEAL			PHF13
	GEMIN2	MAP1LC3B2			PHF23
	GEMIN4	MAP1S			PHLDB3
	GEMIN5	MAP2K1			PHLPP1
	GEMIN6	MAP2K3			PHLPP2
	GEMIN7	MAP2K4			PI4KB
	GFM2	MAP3K14			PIAS1
	GFOD1	MAP3K2			PIAS4
	GFOD2	MAP3K20			PIGBOS1
	GGPS1	MAP3K21			PIK3CB
	GIPR	MAP3K3			PIM2
	GIT2	MAP3K7			PIP4K2A
	GJB3	MAP3K8			PIP4P1
	GJB5	MAP3K9			PIP5K1A
	GJC1	MAP7D1			PISD
	GLA	MAPK8IP2			PITPNC1
	GLIS2	MAPKAPK2			PITX1
	GLIS3	MARK2			PITX3
	GLMN	MARK3			PLA2G7
	GLMP	MARK4			PLAA
	GLRX2	MAST2			PLAGL1
	GLS	MAST3			PLAGL2
	GLUL	MAX			PLAU
	GMIP	MBIP			PLAUR
	GNA13	MBLAC1			PLCH2
	GNAI1	MBNL2			PLCL2
	GNE	MBOAT1			PLEK2
	GNL3	MBTPS2			PLEKHF1
	GOLGA5	MCC			PLEKHF2
	GOLGA7B	MCMBP			PLEKHG1
	GOLPH3	MDFI			PLEKHM1
	GOLPH3L	MED1			PLEKHN1
	GON4L	MED13			PLEKHO1
	GOPC	MED13L			PLIN2
	GORASP2	MED15			PLIN3
	GOSR1	MED17			PLK2
	GOSR2	MED19			PLK3
	GPANK1	MED21			PLPP5
	GPAT3	MED4			PMAIP1
	GPATCH2	MED6			PMF1
	GPATCH3	MED8			PML
	GPBP1	MEF2D			PMP22
	GPD1	MESD			PNO1
	GPER1	MESP1			PNP
	GPKOW	METRNL			PNRC1
	GPN1	MFAP2			POGK
	GPN2	MFAP3L			POLR1C
	GPR157	MFSD12			POLR1E
	GPR162	MFSD2A			POLR2A
	GPR180	MFSD5			POLR2B
	GPR3	MFSD9			POLR3A
	GPR39	MGAT1			POLR3B
	GPR63	MGAT2			POLR3C
	GPR89A	MGLL			POLR3D
	GPR89B	MIA2			POLR3H
	GPRC5A	MICA			POMGNT2
	GPRC5C	MICB			POP1
	GPX8	MIEF2			POP7
	GRAMD1A	MIER1			POU6F1
	GRAMD1B	MIER2			PPARD
	GRAMD2B	MINDY3			PPIF
	GRB10	MINK1			PPM1B
	GRB2	MIR1825			PPM1D
	GRB7	MIR1909			PPM1K
	GREB1	MIR3658			PPME1
	GRIN2D	MIR4800			PPP1R10
	GRPEL1	MIR6751			PPP1R1C
	GRWD1	MIR6881			PPP1R8
	GSK3B	MISP			PPP2CB
	GTF2B	MKNK2			PPP2R1B
	GTF2E1	MKRN1			PPP2R2A
	GTF2E2	MKRN2			PPP2R3A
	GTF2H2	MLLT10			PPP2R5B
	GTF2H2B	MNT			PPP4R1
	GTF2H2C	MNX1-AS1			PPP4R2
	GTF2H5	MOB2			PPP4R3A
	GTF3C4	MOB3A			PPP4R3B
	GTF3C5	MOB3B			PPT2
	GTPBP1	MOGS			PPTC7
	GTPBP2	MON1A			PRAG1
	GTPBP8	MORC2			PRCC
	GULP1	MORC3			PREX1
	GXYLT1	MOSMO			PRKCD
	H3F3B	MOSPD2			PRKCE
	H3F3C	MPHOSPH10			PRKCI
	HAP1	MPHOSPH6			PRKCQ-AS1
	HARBI1	MPLKIP			PRKD2
	HAS3	MPP5			PROCR
	HAUS8	MPRIP			PROSER2
	HBEGF	MPV17L2			PRPF4
	HBP1	MPZL1			PRRG1
	HCCS	MPZL2			PRRT4
	HCP5	MR1			PRRX2
	HDAC7	MRAP2			PRSS8
	HDHD3	MRM1			PRUNE1
	HEATR6	MRM3			PRXL2C
	HECA	MRPL14			PSD3
	HECW1	MRPL17			PSEN1
	HELB	MRPL27			PSEN2
	HELZ2	MRPL32			PSMC1
	HERC4	MRPL36			PSMD11
	HERPUD1	MRPL39			PSMD12
	HERPUD2	MRPL50			PSMG1
	HES2	MRPL55			PSMG2
	HEXIM1	MRPS2			PSMG4
	HHEX	MRPS30			PSTK
	HIF1A	MRPS35			PSTPIP2
	HIF1AN	MRTFA			PTEN
	HIP1R	MSMO1			PTER
	HIPK3	MTATP6P2			PTGS1
	HIST1H2AC	MTERF3			PTK2
	HIST1H2BD	MTF1			PTP4A2P2
	HIST1H3E	MTF2			PTP4A3
	HIST2H2AA3	MTFMT			PTPN21
	HIST2H2AA4	MTFR1			PTPN4
	HIST2H4A	MTFR2			PTPN9
	HIST2H4B	MTMR6			PTPRE
	HIVEP2	MTND6P3			PTPRH
	HK2	MTPAP			PTRH2
	HLA-DRB1	MUS81			PUM1
	HLA-DRB3	MYADM			PURA
	HLA-E	MYEOV			PWP1
	HMGA2	MYL9			PWP2
	HMGCR	MYLIP			QPCTL
	HMGCS1	MYO1E			QRICH1
	HMGXB3	NAA35			QRSL1
	HMOX1	NABP1			QTRT2
	HMOX2	NACC2			RAB11FIP1
	HNF1B	NAF1			RAB11FIP5
	HNF4A	NAV1			RAB22A
	HOMER1	NAV3			RAB35
	HOMEZ	NBN			RAB3GAP2
	HOXA1	NCK1			RAB3IL1
	HOXB13	NCK1-DT			RAB5A
	HOXB9	NCK2			RAB5IF
	HOXC13	NCOA1			RAB9A
	HOXC9	NCOA6			RABIF
	HPCAL4	NDEL1			RAF1
	HPS5	NDUFAF4			RALGAPB
	HPS6	NDUFV3			RAMACL
	HRH1	NECAP2			RANBP3
	HS3ST1	NECTIN2			RANBP9
	HSD17B14	NECTIN3			RAP1B
	HSF2	NEDD4L			RAPGEF2
	HSPA13	NEK3			RAPH1
	HSPA1B	NELFA			RARA
	HSPA2	NET1			RARA-AS1
	HSPA5	NEU1			RASAL2
	HSPA8P7	NFATC1			RASL10A
	HSPB1	NFE2L3			RASSF2
	HSPBAP1	NFIL3			RASSF5
	HSPH1	NFKB2			RASSF8-AS1
	HTR1D	NFKBIA			RBM15
	HYAL1	NFKBIE			RBM15B
	HYAL2	NFKBIL1			RBM19
	ICAM1	NFS1			RBM23
	IDI1	NGFR			RBM26
	IER5	NGLY1			RBM27
	IFFO2	NINJ1			RBM38
	IFI27	NIP7			RBM42
	IFI35	NIPA1			RBM48
	IFI6	NIPAL1			RBM7
	IFIT1	NIPAL3			RCE1
	IFIT5	NIT1			RCL1
	IFNGR1	NKD1			RCOR2
	IFNGR2	NKD2			RDH10
	IFNLR1	NKIRAS1			RELB
	IFRD1	NKIRAS2			RELT
	IFT46	NKX6-1			REPS1
	IGFBP6	NMI			RESF1
	IKBKE	NMT2			REXO2
	IL10RA	NOB1			RFT1
	IL11	NOCT			RFWD3
	IL15	NOLC1			RGCC
	IL15RA	NOP16			RGMA
	IL17RA	NOTCH2NLA			RGPD5
	IL18	NOTCH2NLB			RGPD6
	IL20RB	NOTCH2NLC			RGPD8
	IL27RA	NOVA2			RGS10
	IL4R	NPC1			RGS14
	IMPA1	NPIPB2			RGS20
	INAVA	NR1H2			RHEB
	ING1	NR2F2			RHEBL1
	INPP1	NR2F6			RHOB
	INSIG1	NR4A1			RHOF
	INSIG2	NRBF2			RHOG
	INTS10	NRIP1			RHOU
	INTS12	NRTN			RHPN2
	INTS14	NSDHL			RIC1
	INTS6	NSMCE3			RIN1
	INTS7	NT5C1B-RDH14			RIOK1
	IP6K2	NUBP1			RIOK2
	IPMK	NUDCD1			RIOX1
	IPPK	NUDT16			RIPK2
	IQCD	NUDT4			RITA1
	IQCJ-SCHIP1	NUDT4B			RLF
	IRAK2	NUFIP1			RMC1
	IREB2	NUMBL			RNASE1
	IRF1	NUP54			RNF103
	IRF2	NUP98			RNF113A
	IRF2BP2	NXT1			RNF114
	IRF2BPL	OCEL1			RNF122
	IRF5	OGFR			RNF126
	IRF7	OLFM1			RNF128
	IRS1	ONECUT1			RNF13
	IRS2	ORAI1			RNF139
	IRX3	ORC2			RNF146
	IRX5	ORMDL1			RNF149
	ISCA2	OSBP			RNF170
	ISG20	OSBPL11			RNF19A
	ISG20L2	OSBPL2			RNF19B
	IST1	OSBPL9			RNF216
	ITCH	OSGIN2			RNF216P1
	ITGA2	OSMR			RNF223
	ITGA5	OSR2			RNF25
	ITGAX	OTUB2			RNF26
	ITPKC	OTULINL			RNF34
	ITPRIPL1	OVOL2			RNF38
	IVNS1ABP	OXNAD1			RNF4
	IWS1	OXR1			RNF44
	IZUMO4	OXSM			RNF8
	JAGN1	OXSR1			RNFT1
	JARID2	P2RY1			RP2
	JAZF1	P2RY2			RPP38
	JHY	P4HA1			RPP40
	JKAMP	P4HA2			RPS20P21
	JMJD1C	PACC1			RPS6KA5
	JMJD6	PAFAH1B1			RRAS2
	JMY	PAG1			RRP1
	JOSD1	PAIP1P1			RRP15
	JRKL	PAK1IP1			RRP36
	JUN	PAK4			RRP8
	JUNB	PAK6			RSL1D1
	KALRN	PALM2-AKAP2			RSPRY1
	KANSL2	PAM16			RTN4
	KATNB1	PANK3			RTN4IP1
	KATNBL1	PANK4			RTN4R
	KBTBD2	PANX1			RUSC2
	KBTBD8	PAPOLG			RWDD2A
	KCNG1	PAX2			RWDD2B
	KCNK1	PAX9			RYBP
	KCNK13	PBDC1			S1PR2
	KCNK6	PCGF1			SACM1L
	KCNK9	PCGF2			SAMD8
	KCNN4	PCOLCE2			SAP130
	KCNRG	PCSK9			SASH1
	KCTD1	PDCD10			SAV1
	KCTD14	PDCD2L			SBDS
	KCTD5	PDE12			SBNO2
	KCTD9	PDGFA			SCAF4
	KDM2A	PDGFB			SCAMP2
	KDM3A	PDGFC			SCARA3
	KDM5B	PEF1			SCML2
	KDM6A	PELI1			SCO1
	KDM6B	PELO			SCYL1
	KDM7A-DT	PER1			SDE2
	KDSR	PER2			SDF2
	KEAP1	PEX11A			SEC14L1
	KHDC1	PEX13			SEC22A
	KHDC4	PEX14			SEC22C
	KIAA0355	PFKFB3			SEC24B
	KIAA0513	PGAP1			SEC24D
	KIAA1217	PGF			SECISBP2L
	KIAA1614-AS1	PGM2L1			SELENOI
	KIF1B	PGM3			SELENOK
	KIF21A	PGS1			SELENOS
	KIF2A	PHC2			SEMA4B
	KIF5A	PHF13			SEMA4C
	KIN	PHF23			SEMA6A
	KIRREL2	PHLDB3			SENP5
	KLC1	PHLPP1			SEPHS2
	KLF14	PHLPP2			SERINC1
	KLF2	PHRF1			SERP1
	KLF3	PI4KB			SERPINB5
	KLF4	PIAS1			SERPINE1
	KLF5	PIAS4			SERPINH1
	KLF7	PIGBOS1			SERTAD1
	KLF9	PIK3CB			SERTAD2
	KLHDC10	PIM2			SERTAD3
	KLHDC8B	PIP4K2A			SESN2
	KLHL15	PIP4P1			SETD1A
	KLHL18	PIP5K1A			SF3A1
	KLHL26	PISD			SFN
	KLHL28	PITPNC1			SGMS1
	KLHL36	PITX1			SGSH
	KLHL7	PITX3			SGTB
	KLK10	PLA2G7			SH2B3
	KMT2E	PLAA			SH2D2A
	KMT5B	PLAGL1			SH2D3A
	KNSTRN	PLAGL2			SH3BP2
	KPNA2	PLAU			SH3GLB1
	KPNA4	PLAUR			SH3RF1
	KRAS	PLCB4			SHB
	KRCC1	PLCH2			SHOC2
	KRT15	PLCL2			SIAH2
	KRT18	PLEK2			SIK1
	KRT18P17	PLEKHA8			SIK1B
	KRT18P54	PLEKHF1			SIK3
	KRT19	PLEKHF2			SIL1
	KRT7	PLEKHG1			SIN3A
	KRT80	PLEKHG6			SIN3B
	KRTAP2-3	PLEKHM1			SIRT1
	KTN1-AS1	PLEKHM2			SKIL
	KYAT3	PLEKHN1			SLC10A3
	L1CAM	PLEKHO1			SLC10A4
	LACTB	PLIN2			SLC13A3
	LAD1	PLIN3			SLC16A14
	LAMB3	PLK2			SLC16A9
	LANCL2	PLK3			SLC19A2
	LARP4	PLPP5			SLC25A19
	LARP4B	PMAIP1			SLC25A22
	LAT2	PMF1			SLC25A33
	LATS2	PML			SLC26A11
	LCA5	PMP22			SLC29A1
	LCAT	PNO1			SLC29A3
	LDB1	PNP			SLC2A1
	LDLR	PNRC1			SLC2A3
	LEMD3	POGK			SLC2A4
	LENG1	POLR1C			SLC2A6
	LENG9	POLR1E			SLC30A1
	LEO1	POLR2A			SLC30A6
	LETM1	POLR2B			SLC30A7
	LETM2	POLR3A			SLC31A2
	LGALSL	POLR3B			SLC35A2
	LGMN	POLR3C			SLC35E4
	LHFPL2	POLR3D			SLC35G2
	LHX2	POLR3H			SLC37A3
	LHX5	POM121			SLC38A2
	LIG4	POM121C			SLC43A2
	LIMA1	POMGNT2			SLC45A4
	LIN54	POP1			SLC4A1AP
	LIN9	POP7			SLC66A1
	LINC00346	POU6F1			SLC6A10P
	LINC00592	PPARD			SLC6A17
	LINC00623	PPARG			SLC9A1
	LINC00973	PPAT			SLC9A3R1
	LINC01128	PPIF			SLMAP
	LINC01273	PPM1B			SMAD3
	LINC01338	PPM1D			SMAD7
	LINC01405	PPM1K			SMAGP
	LINC01547	PPME1			SMARCAL1
	LINC02210	PPP1R10			SMIM12
	LINC02273	PPP1R13L			SMIM13
	LINC02323	PPP1R1C			SMIM15
	LINC02608	PPP1R26-AS1			SMNDC1
	LIPH	PPP1R8			SMTN
	LIPT1	PPP2CB			SNAI1
	LMAN2L	PPP2R1B			SNAP47
	LMBR1	PPP2R2A			SNIP1
	LMBR1L	PPP2R2D			SNRK
	LMBRD1	PPP2R3A			SNW1
	LMCD1	PPP2R5B			SNX13
	LMO4	PPP3CC			SNX16
	LMX1B	PPP3R1			SNX4
	LPAR1	PPP4R1			SNX9
	LPAR2	PPP4R2			SOAT1
	LPAR5	PPP4R3A			SOCS1
	LPCAT4	PPP4R3B			SOCS2
	LPP	PPT2			SOCS3
	LRCH1	PPTC7			SOCS6
	LRCH3	PRAG1			SOS1
	LRFN1	PRCC			SOWAHC
	LRFN3	PREB			SOX18
	LRIG3	PREX1			SP100
	LRP4-AS1	PRIMA1			SP3
	LRP6	PRKCD			SPATA2
	LRRC3	PRKCE			SPATS2
	LRRC41	PRKCI			SPCS2P4
	LRRC42	PRKCQ-AS1			SPHK1
	LRRC59	PRKD2			SPINDOC
	LRRC75B	PROCR			SPIRE1
	LRRC8A	PROSER1			SPRED2
	LRRC8B	PROSER2			SPRY2
	LRRC8C	PRPF4			SPSB1
	LRRFIP2	PRR5			SQLE
	LSM10	PRRG1			SRC
	LTBR	PRRT4			SRF
	LTV1	PRRX2			SRGAP2
	LURAP1L	PRSS8			SRP68
	LYL1	PRUNE1			SRRD
	LYPLA2	PRXL2C			SS18L2
	LYST	PSD3			STAM
	LZTS2	PSEN1			STARD8
	M1AP	PSEN2			STAT4
	MACO1	PSKH1			STC2
	MAD2L1BP	PSMC1			STEAP3
	MAEA	PSMD11			STK10
	MAFA	PSMD12			STK17A
	MAFF	PSMG1			STK40
	MAFG-DT	PSMG2			STOM
	MAGEA2	PSMG4			STPG1
	MAGEA2B	PSTK			STRIP1
	MAMDC2	PSTPIP2			STX11
	MAMSTR	PTDSS1			STXBP3
	MANEAL	PTEN			STXBP5
	MAP11	PTER			SUFU
	MAP1B	PTGES			SUGT1
	MAP1LC3B	PTGS1			SUN3
	MAP1LC3B2	PTK2			SUPT20H
	MAP1S	PTP4A2P2			SUPT7L
	MAP2K1	PTP4A3			SVIL
	MAP2K3	PTPN1			SWSAP1
	MAP2K4	PTPN21			SYBU
	MAP3K1	PTPN4			SYDE1
	MAP3K2	PTPN9			SYN2
	MAP3K20	PTPRE			SYNE1
	MAP3K2-DT	PTPRH			SYNE4
	MAP3K3	PTPRJ			SYNJ2
	MAP3K7	PTPRK			SYS1
	MAP3K8	PTRH2			SYTL3
	MAP3K9	PUM1			TAB2
	MAP4K3	PURA			TACC1
	MAP7D1	PWP1			TACC2
	MAP7D3	PWP2			TADA2B
	MAPK6	PWWP2B			TAF11
	MAPK8IP2	PXDC1			TAF13
	MAPKAPK5-AS1	QPCTL			TAF4
	MAPRE2	QRICH1			TAF4B
	MARCKS	QRSL1			TAF5
	MARK1	QTRT2			TANC1
	MARK2	RAB11FIP1			TANGO6
	MARK3	RAB11FIP5			TAOK1
	MARVELD2	RAB22A			TASOR2
	MAST2	RAB35			TAX1BP1
	MAST3	RAB3A			TBC1D12
	MAT2A	RAB3B			TBC1D17
	MAX	RAB3GAP2			TBC1D2
	MB21D2	RAB3IL1			TBC1D20
	MBD1	RAB5A			TBC1D22B
	MBIP	RAB5IF			TBC1D23
	MBLAC1	RAB9A			TBC1D30
	MBNL2	RABIF			TBC1D4
	MBOAT1	RAF1			TBC1D9
	MBOAT7	RALGAPA1			TBC1D9B
	MCAM	RALGAPB			TBK1
	MCC	RAMACL			TBPL1
	MCMBP	RANBP3			TBX18
	MDFI	RANBP9			TBXA2R
	MEAK7	RANGAP1			TCAIM
	MECOM	RAP1B			TCF20
	MED13	RAPGEF2			TEAD4
	MED15	RAPH1			TENT2
	MED17	RARA			TENT5A
	MED19	RARA-AS1			TENT5B
	MED20	RARG			TERF2
	MED21	RASAL2			TEX10
	MED29	RASL10A			TEX264
	MED6	RASSF2			TEX54
	MED7	RASSF5			TFDP2
	MED8	RASSF8-AS1			TFG
	MEF2A	RBM15			TFIP11
	MEF2C	RBM15B			TFPT
	MEF2D	RBM19			TGFB1I1
	METRNL	RBM23			TGFBR3
	METTL16	RBM26			TGS1
	METTL18	RBM27			THAP11
	METTL23	RBM34			THAP4
	METTL3	RBM38			THEMIS2
	METTL7B	RBM42			TICAM1
	MFAP1	RBM48			TICAM2
	MFAP3	RBM7			TIFA
	MFAP3L	RCE1			TIGD2
	MFSD11	RCL1			TIGD5
	MFSD12	RCOR2			TIMM23
	MFSD2A	RDH10			TIMM8AP1
	MFSD5	RELB			TIMM9
	MFSD9	RELT			TINF2
	MGAT1	REPS1			TIPARP
	MGAT2	RESF1			TIPIN
	MGLL	REXO2			TJP1
	MGRN1	RFK			TLCD1
	MGST2	RFT1			TLCD3A
	MIA2	RFWD3			TLCD5
	MIB1	RGCC			TLX3
	MICA	RGMA			TM2D2
	MICB	RGPD5			TMBIM1
	MIEF2	RGPD6			TMC8
	MIER1	RGPD8			TMCC1
	MIER2	RGS10			TMED7-TICAM2
	MIER3	RGS14			TMEM101
	MIIP	RGS2			TMEM106A
	MINPP1	RGS20			TMEM11
	MIR1304	RHEB			TMEM115
	MIR186	RHEBL1			TMEM121
	MIR1909	RHOB			TMEM127
	MIR21	RHOF			TMEM131L
	MIR3658	RHOG			TMEM151A
	MIR4750	RHOU			TMEM171
	MIR4800	RHPN2			TMEM177
	MIR6514	RIC1			TMEM216
	MIR6748	RIMKLA			TMEM243
	MIR6751	RIN1			TMEM246
	MIR6764	RINT1			TMEM248
	MIR6834	RIOK1			TMEM37
	MIR6881	RIOK2			TMEM39A
	MISP	RIOX1			TMEM41A
	MKLN1	RIPK2			TMEM51
	MKNK2	RITA1			TMEM60
	MKRN1	RLF			TMEM68
	MLKL	RMC1			TMEM86A
	MLLT6	RNASE1			TMEM87A
	MNAT1	RNF103			TMEM92
	MND1	RNF113A			TNFAIP1
	MNT	RNF114			TNFRSF10A
	MNX1-AS1	RNF122			TNFRSF10B
	MOB2	RNF126			TNFRSF12A
	MOB3A	RNF128			TNFRSF1A
	MOCS3	RNF13			TNFRSF21
	MON1A	RNF139			TNFSF9
	MON1B	RNF144A			TNIP1
	MORC2	RNF146			TNK1
	MORC3	RNF149			TNK2
	MOSMO	RNF170			TNRC18
	MOSPD2	RNF182			TNS1
	MPHOSPH10	RNF19A			TOB1
	MPLKIP	RNF19B			TOB2
	MPP5	RNF216			TOMM70
	MPP6	RNF216P1			TOR1A
	MPV17L2	RNF220			TOR1AIP1
	MPZL1	RNF223			TP53BP2
	MPZL2	RNF25			TP53INP2
	MPZL3	RNF26			TPGS1
	MR1	RNF34			TPST2
	MRGPRF	RNF38			TPT1-AS1
	MRM1	RNF4			TRABD2A
	MRM3	RNF44			TRAF3IP2
	MROH7-TTC4	RNF8			TRAF4
	MRPL10	RNFT1			TRAPPC3
	MRPL14	RP2			TRAPPC8
	MRPL15	RPP25			TRIB1
	MRPL16	RPP38			TRIB3
	MRPL17	RPP40			TRIM16L
	MRPL18	RPS20P21			TRIM21
	MRPL32	RPS6KA5			TRIM24
	MRPL34	RPSAP52			TRIM27
	MRPL36	RPUSD1			TRIM44
	MRPL39	RRAS2			TRIM47
	MRPL44	RRP1			TRIM5
	MRPL50	RRP15			TRIM62
	MRPL55	RRP36			TRIM8
	MRPS12	RRP8			TRIML2
	MRPS18C	RSL1D1			TRIO
	MRPS25	RSPRY1			TRIP10
	MRPS30	RTN4			TRIP4
	MRPS30-DT	RTN4IP1			TRIP6
	MRPS35	RTN4R			TRMT12
	MRTFA	RTN4RL1			TRMT1L
	MSL1	RUNX3			TSC22D2
	MSMO1	RUSC2			TSC22D4
	MSRB1	RWDD2A			TSHZ1
	MTA2	RWDD2B			TSKU
	MTATP6P2	RYBP			TSPAN14
	MTBP	S1PR2			TSPAN5
	MTERF3	SAC3D1			TTC22
	MTF1	SACM1L			TTC9
	MTF2	SAMD8			TTC9C
	MTFMT	SAP130			TTK
	MTFR1	SAP30			TTLL4
	MTFR2	SASH1			TTPAL
	MTHFS	SAV1			TTYH1
	MTM1	SBDS			TUBB2A
	MTMR3	SBK1			TUBB6
	MTND6P3	SBNO1			TUBD1
	MTPAP	SBNO2			TUBGCP5
	MTX2	SCAF4			TUFT1
	MUS81	SCAMP2			TWISTNB
	MXD1	SCARA3			TXNDC11
	MYADM	SCML2			TXNL1
	MYEOV	SCO1			TYW3
	MYL12A	SCYL1			UAP1
	MYL9	SDE2			UBALD1
	MYLIP	SDF2			UBALD2
	MYO1E	SEC14L1			UBASH3B
	N4BP1	SEC22A			UBC
	N4BP3	SEC22C			UBE2A
	NAA35	SEC24B			UBE2B
	NAA40	SEC24D			UBE2J2
	NABP1	SEC31A			UBE2L5
	NACC2	SECISBP2L			UBE2O
	NAF1	SELENOI			UBE2R2
	NAGK	SELENOK			UBE3A
	NAGS	SELENOS			UBIAD1
	NAMPT	SEMA4B			UBR1
	NAMPTP1	SEMA4C			UBR2
	NAT1	SEMA6A			UBTD1
	NAT10	SENP5			UBTD2
	NAV1	SEPHS2			UBXN1
	NAV3	SERINC1			UGCG
	NBN	SERP1			ULBP2
	NCEH1	SERPINB5			ULBP3
	NCK1	SERPINE1			UMPS
	NCK1-DT	SERPINH1			UNC50
	NCKAP5L	SERTAD1			UPP1
	NCOA3	SERTAD2			URB2
	NCOA6	SERTAD3			USP15
	NCSTN	SESN2			USP2
	NDEL1	SETD1A			USP25
	NDRG1	SETD2			USP38
	NDST1	SETD3			USP45
	NDUFAF1	SETDB2			USP47
	NDUFAF4	SF3A1			USP53
	NDUFV3	SFN			USP7
	NECAB3	SGMS1			UTP11
	NECAP2	SGSH			UTP25
	NECTIN2	SGTB			UTP6
	NECTIN3	SH2B3			VAPA
	NEDD4L	SH2D2A			VASN
	NEK3	SH2D3A			VCL
	NELFA	SH3BP2			VDR
	NEPRO	SH3GLB1			VPS18
	NET1	SH3RF1			VPS25
	NEU1	SH3TC2			VPS37A
	NEU3	SHB			VPS37B
	NFATC1	SHOC2			VRK2
	NFATC2	SHROOM2			VSIR
	NFE2L2	SIAH2			VTI1A
	NFE2L3	SIDT2			WAC
	NFIL3	SIK1			WAPL
	NFKB1	SIK1B			WBP4
	NFKB2	SIK3			WDR20
	NFKBIA	SIL1			WDR25
	NFKBIE	SIN3A			WDR26
	NFKBIL1	SIN3B			WDR33
	NFKBIZ	SIPA1L2			WDR43
	NFYA	SIRT1			WDR53
	NGDN	SIRT4			WDR75
	NGFR	SKIL			WEE1
	NGLY1	SLAIN2			WFDC21P
	NINJ1	SLC10A3			WFS1
	NIP7	SLC10A4			WHAMM
	NIPAL1	SLC13A3			WIPI1
	NIPAL3	SLC16A10			WNT10B
	NIPBL	SLC16A14			WNT6
	NIT1	SLC16A9			WNT7B
	NKD2	SLC19A2			WNT9A
	NKIRAS1	SLC1A3			WTAP
	NKX2-8	SLC25A19			XBP1
	NKX6-1	SLC25A22			XKR8
	NLRP1	SLC25A33			XRCC4
	NMI	SLC25A48			YAE1
	NOB1	SLC25A51			YARS2
	NOC3L	SLC26A11			YIPF4
	NOCT	SLC29A1			YJU2
	NOD2	SLC29A3			YPEL5
	NOL11	SLC2A1			YRDC
	NOL12	SLC2A3			YTHDF1
	NOL7	SLC2A4			YWHAG
	NOLC1	SLC2A6			ZADH2
	NOP14-AS1	SLC2A8			ZBTB10
	NOP16	SLC30A1			ZBTB5
	NOTCH2	SLC30A6			ZC3H15
	NOTCH2NLA	SLC30A7			ZC3HC1
	NOTCH2NLB	SLC31A2			ZCCHC14
	NOTCH2NLC	SLC35A2			ZCCHC3
	NOVA2	SLC35E4			ZCCHC7
	NPAT	SLC35F3			ZCCHC9
	NPC1	SLC35G2			ZDHHC13
	NPIPB2	SLC36A1			ZDHHC9
	NR1H2	SLC37A1			ZFAND3
	NR2C1	SLC37A3			ZFAND5
	NR2C2AP	SLC38A2			ZFP36
	NR2F2	SLC39A3			ZFP64
	NR2F2-AS1	SLC43A2			ZFYVE9
	NR2F6	SLC45A4			ZMIZ1
	NR3C1	SLC46A3			ZMYM5
	NR4A1	SLC4A1AP			ZMYND19
	NRAV	SLC66A1			ZNF174
	NRBF2	SLC6A10P			ZNF217
	NRG1	SLC6A17			ZNF274
	NRG2	SLC7A6			ZNF280B
	NRIP1	SLC9A1			ZNF296
	NRP1	SLC9A3R1			ZNF330
	NSD3	SLMAP			ZNF346
	NSDHL	SMAD3			ZNF467
	NSFL1C	SMAD7			ZNF507
	NSMCE3	SMAGP			ZNF526
	NSUN4	SMAP2			ZNF576
	NT5C1B-RDH14	SMARCAL1			ZNF579
	NT5C3A	SMARCD1			ZNF609
	NTMT1	SMIM10L1			ZNF639
	NUAK2	SMIM12			ZNF653
	NUBP1	SMIM13			ZNF706
	NUDCD1	SMIM15			ZNF771
	NUDT16	SMNDC1			ZNF777
	NUDT16P1	SMTN			ZNF786
	NUDT4	SNAI1			ZNF79
	NUDT4B	SNAP47			ZNF821
	NUFIP1	SNIP1			ZNF92
	NUFIP2	SNRK			ZNRD1
	NUMBL	SNW1			ZNRD2
	NUP50-DT	SNX13			ZRANB1
	NUP54	SNX16			ZSCAN26
	NUP98	SNX4			ZSWIM6
	NUPR1	SNX9			ZYG11B
	NXT1	SOAT1			ZYX
	NYAP1	SOCS1
	OASL	SOCS2
	OBSCN	SOCS3
	OCEL1	SOCS6
	OCLN	SOS1
	OFD1	SOWAHC
	OGFR	SOX18
	OGFRP1	SOX8
	OGT	SP100
	OPHN1	SP3
	OPLAH	SPAG9
	OR2A1-AS1	SPATA2
	OR2A4	SPATS2
	OR2A7	SPCS2P4
	OR2A9P	SPHK1
	ORAI1	SPINDOC
	ORC2	SPIRE1
	ORMDL2	SPRED1
	OSBP	SPRED2
	OSBPL2	SPRY2
	OSBPL5	SPSB1
	OSBPL9	SQLE
	OSER1	SRC
	OSGIN1	SRF
	OSGIN2	SRGAP1
	OSMR	SRGAP2
	OSR2	SRP68
	OTUB2	SRPRB
	OTUD4	SRRD
	OTUD7B	SS18L2
	OVOL1	ST3GAL4
	OXNAD1	ST3GAL5
	OXSM	STAM
	OXSR1	STARD8
	P2RY1	STAT3
	P2RY2	STAT4
	P4HA1	STC2
	P4HA2	STEAP3
	PABPC1P3	STK10
	PACC1	STK17A
	PACSIN3	STK38
	PAFAH1B1	STK40
	PAG1	STOM
	PAIP1P1	STPG1
	PAK1IP1	STRIP1
	PAK4	STX11
	PAK6	STXBP3
	PALB2	STXBP5
	PALM2-AKAP2	SUFU
	PANX1	SUGT1
	PAPOLG	SUN3
	PAQR7	SUPT20H
	PARD3	SUPT7L
	PARD6B	SURF4
	PARP12	SVIL
	PARP8	SWSAP1
	PARP9	SYBU
	PARS2	SYDE1
	PAWR	SYN2
	PAX2	SYNE1
	PAX8-AS1	SYNE4
	PAX9	SYNJ2
	PBDC1	SYS1
	PBXIP1	SYT1
	PCCA-DT	SYTL3
	PCDH1	TAB2
	PCGF1	TACC1
	PCGF2	TACC2
	PCID2	TADA2B
	PCOLCE2	TAF11
	PCYT1A	TAF13
	PCYT2	TAF4
	PDCD10	TAF4B
	PDCD2L	TAF5
	PDGFA	TANC1
	PDGFB	TANGO6
	PDHB	TAOK1
	PDLIM7	TASOR2
	PDP2	TAX1BP1
	PELI1	TBC1D12
	PELO	TBC1D17
	PER1	TBC1D2
	PER2	TBC1D20
	PEX11A	TBC1D22B
	PEX13	TBC1D23
	PEX14	TBC1D30
	PFDN2	TBC1D4
	PFDN6	TBC1D9
	PFKFB3	TBC1D9B
	PGF	TBK1
	PGM2L1	TBPL1
	PGRMC2	TBX18
	PHAX	TBXA2R
	PHC2	TCAIM
	PHF11	TCF20
	PHF12	TEAD4
	PHF13	TENT2
	PHF23	TENT5A
	PHF8	TENT5B
	PHKG2	TERF2
	PHLDA1	TERF2IP
	PHLDB3	TET3
	PHLPP1	TEX10
	PHLPP2	TEX2
	PI4KB	TEX264
	PIAS1	TEX54
	PIAS4	TFAP2A
	PICK1	TFDP2
	PIGBOS1	TFG
	PIGC	TFIP11
	PIGG	TFPT
	PIGM	TGFB1I1
	PIK3C2A	TGFBR3
	PIK3CA	TGFBRAP1
	PIK3CB	TGS1
	PIK3CD	THAP11
	PIK3R1	THAP4
	PIKFYVE	THEMIS2
	PIM1	TIAL1
	PIM2	TICAM1
	PIP4K2A	TICAM2
	PIP4P1	TIFA
	PIP5K1A	TIGD2
	PIP5KL1	TIGD5
	PISD	TIMM23
	PITPNB	TIMM8AP1
	PITPNC1	TIMM9
	PITX1	TINF2
	PITX2	TIPARP
	PITX3	TIPIN
	PKN2	TJP1
	PKNOX1	TLCD1
	PLA2G15	TLCD3A
	PLA2G4A	TLCD5
	PLA2G7	TLK1
	PLAA	TLX3
	PLAGL1	TM2D2
	PLAGL2	TM9SF4
	PLAT	TMA16
	PLAU	TMBIM1
	PLAUR	TMC8
	PLCH2	TMCC1
	PLCL2	TMCC2
	PLEK2	TMED7-TICAM2
	PLEKHA5	TMEM101
	PLEKHF1	TMEM106A
	PLEKHF2	TMEM109
	PLEKHG1	TMEM11
	PLEKHG2	TMEM115
	PLEKHG3	TMEM121
	PLEKHM1	TMEM127
	PLEKHN1	TMEM131L
	PLEKHO1	TMEM135
	PLIN2	TMEM151A
	PLIN3	TMEM161B
	PLK2	TMEM165
	PLK3	TMEM171
	PLPP5	TMEM177
	PLPP6	TMEM185B
	PLSCR1	TMEM189
	PMAIP1	TMEM216
	PMF1	TMEM243
	PML	TMEM246
	PMP22	TMEM248
	PMPCA	TMEM250
	PNMA1	TMEM37
	PNO1	TMEM39A
	PNP	TMEM41A
	PNPLA8	TMEM42
	PNRC1	TMEM51
	PNRC2	TMEM52
	PNRC2P1	TMEM60
	POC5	TMEM68
	POGK	TMEM86A
	POLA2	TMEM87A
	POLB	TMEM92
	POLG2	TNFAIP1
	POLH	TNFRSF10A
	POLR1A	TNFRSF10B
	POLR1C	TNFRSF12A
	POLR1D	TNFRSF1A
	POLR1E	TNFRSF21
	POLR2A	TNFSF9
	POLR2B	TNIP1
	POLR3A	TNK1
	POLR3B	TNK2
	POLR3C	TNRC18
	POLR3D	TNS1
	POLR3E	TNS4
	POLR3H	TOB1
	POMGNT2	TOB2
	POP1	TOM1L2
	POP7	TOMM20P1
	POPDC3	TOMM20P4
	POR	TOMM40
	POU6F1	TOMM70
	PPARD	TOP3B
	PPHLN1	TOP3BP1
	PPIF	TOR1A
	PPM1A	TOR1AIP1
	PPM1B	TP53BP2
	PPM1D	TP53INP2
	PPM1K	TPGS1
	PPME1	TPPP
	PPP1R10	TPST2
	PPP1R15A	TPT1-AS1
	PPP1R15B	TRABD2A
	PPP1R1C	TRAF3IP2
	PPP1R21	TRAF4
	PPP1R2B	TRAM2
	PPP1R3D	TRAPPC3
	PPP1R8	TRAPPC8
	PPP2CA	TRIB1
[truncated: 1,066 more rows]

## Sheet: PUM1&2 GO Term Analysis
Gene Ontology Analysis of Significantly Upregulated Genes by PUM1&2 RNAi
PUM1&2 RNAi
Biological Process
Term	Count	%	PValue	Genes	List Total	Pop Hits	Pop Total	Fold Enrichment	Bonferroni	Benjamini	FDR
GO:0045893~positive regulation of transcription, DNA-templated	50	5.9952	3.11742e-07	ILK, ETS1, ELK1, ELK3, MED17, MED13, CDH1, CREB3L2, MYBL1, MAP2K3, MED1, MAP2K1, NCOA6, FBXW11, NCOA3, MED4, TGFBR1, PIAS1, PPM1A, CCNE1, CKS2, WAC, PPARG, IFNAR1, KMT2E, SP100, PDGFB, LRP5, BCL10, NPAS2, ARNTL, LRP6, HMBOX1, DVL1, BRD7, MAP3K2, EGR1, TGFB1, NR1H2, FOXN2, KLF2, HIPK2, DAB2, CDK7, KLF5, FUBP3, ID2, NFE2L3, SNAI1, TAF4	739	515	16792	2.20608	0.00100642	0.00100693	0.000996017
GO:0016055~Wnt signaling pathway	26	3.11751	7.02189e-07	MACF1, GSK3B, GSK3A, LDB1, LRP5, LRP4, LRP6, SNX3, HHEX, HMGXB4, TNKS2, DVL1, LEO1, MARK4, BRD7, MARK2, PIAS4, CSNK1G3, FBXW11, WNT7B, PPM1A, DAB2, APC, CCNE1, FERMT2, TRABD2A	739	187	16792	3.15929	0.0022655	0.00113403	0.00112175
GO:0030335~positive regulation of cell migration	24	2.8777	6.16673e-06	LYN, SPAG9, CARMIL1, TGFB1, MCAM, PDGFB, PDGFA, ILK, LAMC2, F3, THBS1, TGFBR1, SDCBP, DAB2, APC, PDCD10, MYADM, SNAI1, FGFR1OP, ITGA6, ITGA5, MAPRE1, EPHA1, HBEGF	739	184	16792	2.96382	0.0197215	0.00526934	0.00521224
GO:0045944~positive regulation of transcription from RNA polymerase II promoter	74	8.8729	6.5255e-06	GSK3B, LDB1, EIF4A3, SERPINE1, ETS1, ELK1, ELK3, MED17, RPS6KA3, HHEX, MED13, SIN3A, NAMPT, CREB3L2, JUNB, HMGN3, MYBL1, KDM6B, MEF2A, MED1, CHUK, NCOA6, NCOA3, ZBTB38, PPP2R5B, ETV5, GAL, RBL1, MTF2, ITGA6, PPARG, LMX1B, CBFB, LRP5, MOSPD1, NPAS2, STRN3, SLC9A1, ARNTL, LRP6, RELB, HELZ2, PPP3R1, SBNO2, SERTAD1, RAD21, LEO1, PLAGL2, HES1, MSX1, EGR1, TGFB1, NR1H2, LIF, ARID3A, GRHL1, KLF2, NFKB2,…	739	981	16792	1.71404	0.0208569	0.00526934	0.00521224
GO:0006897~endocytosis	20	2.39808	1.08123e-05	LMBR1L, CSNK1G3, SYNRG, USP33, LRP5, INPPL1, LRP4, SNX30, RAB22A, EPN2, EHD1, EEA1, CYTH2, SNX4, NECAP2, NPC1, UNC119, ATP6V1H, SNX9, LDLR	739	139	16792	3.26944	0.0343213	0.00698478	0.00690909
GO:0009791~post-embryonic development	14	1.67866	1.54497e-05	KDM5B, MORC3, TIPARP, IREB2, INPPL1, TGFBR1, IGF2R, SGPL1, CHST11, PPP1R13L, GNAQ, AGO2, PLAGL2, FGFR2	739	73	16792	4.35776	0.0486783	0.0074453	0.00736463
GO:0043434~response to peptide hormone	11	1.31894	1.61353e-05	BTG2, HHEX, BTG1, ANXA1, LRP5, BRAF, TIMP1, GNAI1, CD55, EREG, LRP6	739	44	16792	5.68065	0.0507827	0.0074453	0.00736463
GO:0098609~cell-cell adhesion	29	3.47722	2.50091e-05	MACF1, DOCK9, ASAP1, SLC3A2, NDRG1, CNN3, LIMA1, SDCBP, KLC2, PPP1R13L, STK38, EPS8L1, ARFIP1, SNX9, S100A11, MARK2, ZC3H15, SCYL1, VASP, EPN2, TJP1, EHD1, ANLN, MYO1B, KRT18, FMNL2, STK24, MAPRE1, EPHA2	739	271	16792	2.43157	0.0776038	0.0100974	0.00998801
GO:0006367~transcription initiation from RNA polymerase II promoter	20	2.39808	3.88528e-05	MED1, TAF13, NCOA6, GTF2B, NR1H2, MED4, MED17, CDK8, NR4A1, CDK7, MED13, POLR2A, ERCC3, POLR2B, MED31, TAF4B, PPARG, TAF4, POLR2J, POLR2K	739	152	16792	2.98982	0.117942	0.0139438	0.0137927
GO:0006468~protein phosphorylation	40	4.79616	5.82812e-05	GSK3B, GSK3A, GMFB, TRIO, PDGFB, ILK, RPS6KA3, GRK3, STK38, ERBB2, MKNK2, TLK1, RIOK1, MAPK6, MARK4, SCYL2, MARK2, MAP4K3, LYN, MAP3K2, PLK3, MORC3, TGFB1, PRKCH, CHUK, PRKCD, MINK1, BRAF, HIPK1, HIPK3, TGFBR1, HIPK2, CDK8, CDK7, ERCC3, STK24, CCNE1, PRKD3, TAOK1, MAPKAPK2	739	456	16792	1.99321	0.171596	0.0188248	0.0186209
GO:0016477~cell migration	21	2.51799	6.95036e-05	USP24, CARMIL1, GSK3B, TGFB1, BTG1, SDC4, WWC1, USP33, PTPRK, TNFAIP1, THBS1, PPP1R9B, SLC9A1, DEPDC1B, APC, SNAI1, CDK1, ABL2, HES1, EPHA2, NDEL1	739	172	16792	2.77427	0.201088	0.0198877	0.0196722
GO:0042327~positive regulation of phosphorylation	8	0.959233	7.38861e-05	MOB1B, SDCBP, GRB10, ILK, ITGA6, BCL10, THBS1, EREG	739	25	16792	7.27123	0.212318	0.0198877	0.0196722
GO:0018108~peptidyl-tyrosine phosphorylation	19	2.27818	0.000135867	LYN, MAP2K3, MAP2K1, PRKCD, PDGFB, TTK, CSF2RA, EREG, FGFR1OP2, ERBB2, NPTN, FGFR1OP, ABL2, EPHA1, FGFR3, FGFR2, SCYL1, HBEGF, EPHA2	739	153	16792	2.82176	0.355242	0.0337577	0.0333919
GO:0032091~negative regulation of protein binding	11	1.31894	0.000167623	GSK3B, EPB41L5, LRPAP1, DAB2, TDG, USP33, PRKCD, DVL1, PDGFB, DKK1, PEX14	739	57	16792	4.38506	0.418107	0.038673	0.038254
GO:0048008~platelet-derived growth factor receptor signaling pathway	8	0.959233	0.000205763	SGPL1, RGS14, TIPARP, ZFAND5, PDGFB, PDGFA, PTPRJ, PLAT	739	29	16792	6.2683	0.485564	0.0443077	0.0438276
Molecular Function
Term	Count	%	PValue	Genes	List Total	Pop Hits	Pop Total	Fold Enrichment	Bonferroni	Benjamini	FDR
GO:0005515~protein binding	519	62.2302	1.36745e-23	NCKAP1, TRIO, SERPINE1, ELK1, ALKBH8, ELK3, PPP4R2, UBASH3B, FGFR1OP2, NAMPT, PRSS8, JUNB, MEF2A, MED1, GABARAPL1, CXADR, PRKCD, ZFYVE21, ARMC7, GTPBP2, MED4, DKK1, CD2AP, SCAMP2, DAAM1, PRKD3, TBPL1, NHLRC2, NUP98, SLBP, LRPAP1, MAPKAP1, PDGFB, PDGFA, NEDD4L, BCL10, MTMR6, PPP3R1, NCSTN, RHOT1, RNF216, RAD21, VTI1A, HMOX1, S100A11, LYN, PLK3, NGFR, NDFIP2, NDFIP1, APOOL, H3F3B, H3F3C, FZD6, BRAF…	746	8785	16881	1.33686	1.22934e-20	1.22934e-20	1.2184e-20
GO:0098641~cadherin binding involved in cell-cell adhesion	34	4.07674	6.22715e-07	MACF1, DOCK9, ASAP1, SLC3A2, NDRG1, CNN3, LIMA1, SDCBP, KLC2, PPP1R13L, CDH1, STK38, EPS8L1, ARFIP1, SNX9, S100A11, MARK2, ZC3H15, SCYL1, VASP, ANXA1, CD2AP, EPN2, TJP1, EHD1, ANLN, MYO1B, KRT18, FMNL2, STK24, ITGA6, MAPRE1, VCL, EPHA2	746	290	16881	2.65302	0.000559664	0.00027991	0.00027742
GO:0046966~thyroid hormone receptor binding	9	1.07914	1.45689e-05	MED1, MED13, NCOA6, NCOA3, GTF2B, JMJD1C, MED4, HMGN3, MED17	746	27	16881	7.5429	0.0130122	0.00436583	0.00432698
GO:0004672~protein kinase activity	34	4.07674	5.76004e-05	GSK3B, ILK, PPP1R9B, RPS6KA3, GRK3, ERBB2, MKNK2, ABL2, MAP3K7, SCYL2, MAP4K3, SCYL1, MAP2K3, MAP3K2, CSNK1G3, MAP2K1, PRKCH, CHUK, PRKCD, MINK1, BRAF, HIPK1, HIPK3, TGFBR1, HIPK2, CDK8, CDK7, ERCC3, STK24, TAOK1, MAPKAPK2, CDK1, CDK12, EPHA1	746	359	16881	2.14311	0.0504663	0.0129457	0.0128305
GO:0004674~protein serine/threonine kinase activity	34	4.07674	0.000139799	GSK3B, GSK3A, TRIO, ILK, TTK, RPS6KA3, STK38, MKNK2, TLK1, RIOK1, MAPK6, MARK4, MAP3K7, MARK2, MAP4K3, MAP2K3, MAP3K2, PLK3, CSNK1G3, MAP2K1, PRKCH, PRKCD, MINK1, BRAF, HIPK1, HIPK3, TGFBR1, HIPK2, CDK8, CDK7, STK24, TAOK1, MAPKAPK2, CDK1	746	376	16881	2.04621	0.11811	0.0206861	0.020502
GO:0017017~MAP kinase tyrosine/serine/threonine phosphatase activity	6	0.719424	0.000158101	DUSP4, DUSP5, DUSP2, DUSP8, DUSP16, DUSP6	746	13	16881	10.444	0.132504	0.0206861	0.020502
GO:0008022~protein C-terminus binding	21	2.51799	0.000161071	PIAS4, MAP2K1, CEP135, TAF13, LIG4, BCL10, ATP1B1, PIAS1, CD2AP, TJP1, PPP2CB, SDCBP, DAB2, CDK7, ERCC3, ERCC1, ERBB2, AGO2, TOPBP1, MAPRE1, SASH1	746	182	16881	2.611	0.134817	0.0206861	0.020502
KEGG Pathway
hsa04010:MAPK signaling pathway	35	4.19664	1.33511e-07	PDGFB, PDGFA, ELK1, DUSP16, RELB, RAP1B, RPS6KA3, PPP3R1, RRAS, MKNK2, FLNC, MAP3K7, MAP4K3, MAP2K3, DUSP4, MAP3K2, DUSP5, MAP2K1, DUSP2, TGFB1, CHUK, BRAF, DUSP8, TGFBR1, DUSP6, NFKB2, NR4A1, PPM1A, PPM1B, TAOK1, RASA2, MAPKAPK2, KRAS, FGFR3, FGFR2	350	253	6879	2.71897	3.33772e-05	3.33777e-05	3.19091e-05
hsa04144:Endocytosis	30	3.59712	1.09543e-05	RAB5B, ARF1, SNX12, NEDD4L, ASAP1, RAB22A, SNX3, EEA1, SNX4, CYTH2, PARD6B, GRK3, PSD3, LDLR, CYTH1, ARFGEF1, VPS37A, TGFBR1, IGF2R, RAB11A, EPN2, HLA-E, EHD1, DAB2, ITCH, ACAP2, NEDD4, CHMP6, FGFR3, FGFR2	350	241	6879	2.44659	0.00273483	0.00136928	0.00130903
Disease
ovarian cancer	40	4.79616	1.88269e-06	CDKN1A, SERPINE1, PDGFB, PLAT, PLOD2, COMT, PANX1, CDH1, ERBB2, NBN, TIMP1, E2F6, KLF10, DUSP5, GABARAPL1, TNFRSF12A, TIPARP, NCOA3, PLAUR, MIR21, TNFRSF10A, BRAF, HSPE1, KLK10, DKK1, TGFBR1, NFKB2, DAB2, CDK7, RBL1, CCNE2, CCNE1, CCNG2, ID2, ERCC1, SNAI1, TNFSF9, KRAS, ITGA6, FGFR2	610	370	12971	2.2988	0.00413524	0.00414381	0.00414192

## Sheet: PUM1&2+CNOT1+CNOT7&8 GO Term
Gene Ontology Analysis of Significantly Upregulated Genes by PUM1&2+CNOT1+CNOT7&8 RNAi
PUM1&2 + CNOT1 + CNOT7&8 RNAi
Biological Process
Term	Count	%	PValue	Genes	List Total	Pop Hits	Pop Total	Fold Enrichment	Bonferroni	Benjamini	FDR
GO:0045893~positive regulation of transcription, DNA-templated	50	5.9952	3.11742e-07	ILK, ETS1, ELK1, ELK3, MED17, MED13, CDH1, CREB3L2, MYBL1, MAP2K3, MED1, MAP2K1, NCOA6, FBXW11, NCOA3, MED4, TGFBR1, PIAS1, PPM1A, CCNE1, CKS2, WAC, PPARG, IFNAR1, KMT2E, SP100, PDGFB, LRP5, BCL10, NPAS2, ARNTL, LRP6, HMBOX1, DVL1, BRD7, MAP3K2, EGR1, TGFB1, NR1H2, FOXN2, KLF2, HIPK2, DAB2, CDK7, KLF5, FUBP3, ID2, NFE2L3, SNAI1, TAF4	739	515	16792	2.20608	0.00100642	0.00100693	0.000996017
GO:0016055~Wnt signaling pathway	26	3.11751	7.02189e-07	MACF1, GSK3B, GSK3A, LDB1, LRP5, LRP4, LRP6, SNX3, HHEX, HMGXB4, TNKS2, DVL1, LEO1, MARK4, BRD7, MARK2, PIAS4, CSNK1G3, FBXW11, WNT7B, PPM1A, DAB2, APC, CCNE1, FERMT2, TRABD2A	739	187	16792	3.15929	0.0022655	0.00113403	0.00112175
GO:0030335~positive regulation of cell migration	24	2.8777	6.16673e-06	LYN, SPAG9, CARMIL1, TGFB1, MCAM, PDGFB, PDGFA, ILK, LAMC2, F3, THBS1, TGFBR1, SDCBP, DAB2, APC, PDCD10, MYADM, SNAI1, FGFR1OP, ITGA6, ITGA5, MAPRE1, EPHA1, HBEGF	739	184	16792	2.96382	0.0197215	0.00526934	0.00521224
GO:0045944~positive regulation of transcription from RNA polymerase II promoter	74	8.8729	6.5255e-06	GSK3B, LDB1, EIF4A3, SERPINE1, ETS1, ELK1, ELK3, MED17, RPS6KA3, HHEX, MED13, SIN3A, NAMPT, CREB3L2, JUNB, HMGN3, MYBL1, KDM6B, MEF2A, MED1, CHUK, NCOA6, NCOA3, ZBTB38, PPP2R5B, ETV5, GAL, RBL1, MTF2, ITGA6, PPARG, LMX1B, CBFB, LRP5, MOSPD1, NPAS2, STRN3, SLC9A1, ARNTL, LRP6, RELB, HELZ2, PPP3R1, SBNO2, SERTAD1, RAD21, LEO1, PLAGL2, HES1, MSX1, EGR1, TGFB1, NR1H2, LIF, ARID3A, GRHL1, KLF2, NFKB2,…	739	981	16792	1.71404	0.0208569	0.00526934	0.00521224
GO:0006897~endocytosis	20	2.39808	1.08123e-05	LMBR1L, CSNK1G3, SYNRG, USP33, LRP5, INPPL1, LRP4, SNX30, RAB22A, EPN2, EHD1, EEA1, CYTH2, SNX4, NECAP2, NPC1, UNC119, ATP6V1H, SNX9, LDLR	739	139	16792	3.26944	0.0343213	0.00698478	0.00690909
GO:0009791~post-embryonic development	14	1.67866	1.54497e-05	KDM5B, MORC3, TIPARP, IREB2, INPPL1, TGFBR1, IGF2R, SGPL1, CHST11, PPP1R13L, GNAQ, AGO2, PLAGL2, FGFR2	739	73	16792	4.35776	0.0486783	0.0074453	0.00736463
GO:0043434~response to peptide hormone	11	1.31894	1.61353e-05	BTG2, HHEX, BTG1, ANXA1, LRP5, BRAF, TIMP1, GNAI1, CD55, EREG, LRP6	739	44	16792	5.68065	0.0507827	0.0074453	0.00736463
GO:0098609~cell-cell adhesion	29	3.47722	2.50091e-05	MACF1, DOCK9, ASAP1, SLC3A2, NDRG1, CNN3, LIMA1, SDCBP, KLC2, PPP1R13L, STK38, EPS8L1, ARFIP1, SNX9, S100A11, MARK2, ZC3H15, SCYL1, VASP, EPN2, TJP1, EHD1, ANLN, MYO1B, KRT18, FMNL2, STK24, MAPRE1, EPHA2	739	271	16792	2.43157	0.0776038	0.0100974	0.00998801
GO:0006367~transcription initiation from RNA polymerase II promoter	20	2.39808	3.88528e-05	MED1, TAF13, NCOA6, GTF2B, NR1H2, MED4, MED17, CDK8, NR4A1, CDK7, MED13, POLR2A, ERCC3, POLR2B, MED31, TAF4B, PPARG, TAF4, POLR2J, POLR2K	739	152	16792	2.98982	0.117942	0.0139438	0.0137927
GO:0006468~protein phosphorylation	40	4.79616	5.82812e-05	GSK3B, GSK3A, GMFB, TRIO, PDGFB, ILK, RPS6KA3, GRK3, STK38, ERBB2, MKNK2, TLK1, RIOK1, MAPK6, MARK4, SCYL2, MARK2, MAP4K3, LYN, MAP3K2, PLK3, MORC3, TGFB1, PRKCH, CHUK, PRKCD, MINK1, BRAF, HIPK1, HIPK3, TGFBR1, HIPK2, CDK8, CDK7, ERCC3, STK24, CCNE1, PRKD3, TAOK1, MAPKAPK2	739	456	16792	1.99321	0.171596	0.0188248	0.0186209
GO:0016477~cell migration	21	2.51799	6.95036e-05	USP24, CARMIL1, GSK3B, TGFB1, BTG1, SDC4, WWC1, USP33, PTPRK, TNFAIP1, THBS1, PPP1R9B, SLC9A1, DEPDC1B, APC, SNAI1, CDK1, ABL2, HES1, EPHA2, NDEL1	739	172	16792	2.77427	0.201088	0.0198877	0.0196722
GO:0042327~positive regulation of phosphorylation	8	0.959233	7.38861e-05	MOB1B, SDCBP, GRB10, ILK, ITGA6, BCL10, THBS1, EREG	739	25	16792	7.27123	0.212318	0.0198877	0.0196722
GO:0018108~peptidyl-tyrosine phosphorylation	19	2.27818	0.000135867	LYN, MAP2K3, MAP2K1, PRKCD, PDGFB, TTK, CSF2RA, EREG, FGFR1OP2, ERBB2, NPTN, FGFR1OP, ABL2, EPHA1, FGFR3, FGFR2, SCYL1, HBEGF, EPHA2	739	153	16792	2.82176	0.355242	0.0337577	0.0333919
GO:0032091~negative regulation of protein binding	11	1.31894	0.000167623	GSK3B, EPB41L5, LRPAP1, DAB2, TDG, USP33, PRKCD, DVL1, PDGFB, DKK1, PEX14	739	57	16792	4.38506	0.418107	0.038673	0.038254
GO:0048008~platelet-derived growth factor receptor signaling pathway	8	0.959233	0.000205763	SGPL1, RGS14, TIPARP, ZFAND5, PDGFB, PDGFA, PTPRJ, PLAT	739	29	16792	6.2683	0.485564	0.0443077	0.0438276
Molecular Function
Term	Count	%	PValue	Genes	List Total	Pop Hits	Pop Total	Fold Enrichment	Bonferroni	Benjamini	FDR
GO:0006367~transcription initiation from RNA polymerase II promoter	13	0.0229487	2.41406e-05	TAF13, NCOA6, GTF2B, NR1H2, MED17, CDK8, NR4A1, CDK7, MED13, POLR2A, POLR2B, TAF4B, TAF4	309	152	16792	4.64776	0.0432624	0.0442256	0.0440084
GO:0006897~endocytosis	12	0.0211834	5.14708e-05	LMBR1L, EHD1, CSNK1G3, CYTH2, SNX4, NECAP2, NPC1, ATP6V1H, SNX9, LDLR, RAB22A, EPN2	309	139	16792	4.69149	0.0899875	0.0471472	0.0469156
KEGG Pathway
Term	Count	%	PValue	Genes	List Total	Pop Hits	Pop Total	Fold Enrichment	Bonferroni	Benjamini	FDR
hsa04010:MAPK signaling pathway	20	0.0353057	6.0737e-06	MAP2K3, DUSP4, MAP3K2, DUSP5, MAP2K1, DUSP2, PDGFB, PDGFA, DUSP8, ELK1, DUSP16, RELB, NFKB2, RAP1B, NR4A1, PPM1B, TAOK1, MKNK2, KRAS, MAP3K7	162	253	6879	3.35676	0.00121401	0.00121474	0.00119652
Disease
Term	Count	%	PValue	Genes	List Total	Pop Hits	Pop Total	Fold Enrichment	Bonferroni	Benjamini	FDR
ovarian cancer	20	0.0353057	0.000152994	DUSP5, CDKN1A, TNFRSF12A, TIPARP, SERPINE1, PDGFB, PLAUR, TNFRSF10A, COMT, DKK1, NFKB2, PANX1, CDK7, CCNE2, CCNG2, ERCC1, SNAI1, TNFSF9, KRAS, NBN	259	370	12971	2.70709	0.178868	0.197056	0.197056
Colorectal Neoplasms	9	0.0158876	0.00102575	CDKN1A, CDK7, ERCC1, LIG4, KRAS, RHPN2, DIP2B, NBN, SMAD7	259	103	12971	4.37602	0.733358	0.580429	0.580429
Hodgkin Disease|Leukemia, Lymphocytic, Chronic, B-Cell|Lymphoproliferative Disorders|Waldenstrom Macroglobulinemia	10	0.0176529	0.00135193	TNFRSF12A, ERCC1, TNFSF9, TNFRSF10B, LIG4, BCL10, NBN, NFKBIE, RELB, NFKB2	259	133	12971	3.76549	0.824912	0.580429	0.580429

## Sheet: Fig S2D
Figure S2D
		Statistical Significance:	p<0.000001	p<0.000001	p<0.000001
PUM1&2 RNAi	PUM1 RNAi	PUM2 RNAi	[PUM1] vs [PUM1&2]	[PUM2] vs [PUM1&2]	[PUM1] vs [PUM2] vs [PUM1&2]
MARCH_6	AC011479.1	AC012488.2	AC136616.1	AC012488.2	AGO2
7SK	AC087893.1	AC145207.5	AGO2	ADGRG6	ARL5B
A4GALT	AC136616.1	ADGRG6	AL121758.1	AGO2	ATP13A3
ABHD17B	AGO2	AGO2	AL365205.1	AGPS	ATRN
ABL2	AHNAK2	AGPS	ANKRD52	AL445524.1	C6orf136
AC004997.1	AL121758.1	AL445524.1	ARHGAP12	ARL5B	CLN8
AC006511.5	AL162742.2	ARL5B	ARL5B	ATAD3B	CSNK1G3
AC009041.2	AL365205.1	ARNT	ATP13A3	ATP13A3	EGR1
AC009088.3	ANKRD52	ATAD3B	ATRN	ATRN	FAM160B1
AC010198.2	AP000769.4	ATP13A3	B4GALNT3	B4GALNT1	ITGA5
AC012213.5	ARHGAP12	ATRN	BRI3	C6orf136	LIF
AC012488.2	ARL5B	B4GALNT1	C6orf136	CARNMT1	NCKAP1
AC027644.4	ATL2	C6orf136	CALM2	CBFB	SERTAD1
AC044839.3	ATP13A3	CARNMT1	CAMSAP2	CCN1	SLC2A1
AC051619.6	ATRN	CBFB	CDKN1A	CCNE2	TOR1A
AC060771.1	B4GALNT3	CCN1	CEP104	CDK7	UBASH3B
AC068896.1	BRI3	CCND3	CLIC4	CHUK	UBE2B
AC092143.1	C6orf136	CCNE2	CLN8	CLCN2	VSIR
AC093019.2	CALM2	CDK7	CNN3	CLN8
AC099811.2	CAMSAP2	CHUK	CSNK1G3	CSNK1G3
AC110275.1	CDKN1A	CLCN2	DUSP4	CYP24A1
AC118553.2	CEP104	CLN8	DUSP5	CYTH1
AC136616.1	CLIC4	CR936875.1	DUSP8	DKK1
AC141586.1	CLN8	CSNK1G3	EFCAB14	DUSP6
ACAP2	CNN3	CTDSP2	EGR1	EGR1
ACBD5	CSNK1G3	CYP24A1	EPHA2	ELOA
ADAMTSL4-AS1	DUSP4	CYTH1	EXTL3	ETFDH
ADAMTSL5	DUSP5	DKK1	FAM160B1	FAM160B1
ADGRG6	DUSP8	DUSP6	FOSL1	FZD6
AFF4	EFCAB14	EGR1	GCLC	GFPT2
AGO2	EGR1	ELOA	GPAT3	GPCPD1
AGPAT5	EMP1	ELP1	GTPBP2	ID2
AGPS	EPHA2	ETFDH	H3F3B	ITGA5
AIFM2	EXTL3	FAM160B1	HIPK3	JUNB
AL049629.2	FAM160B1	FAM189B	HMOX1	KLF10
AL049844.1	FOSL1	FZD6	ISCA2	KLF2
AL121758.1	FOXD1	GFPT2	ITGA2	LIF
AL133500.1	GCLC	GPCPD1	ITGA5	LIG4
AL138789.1	GPAT3	ID2	ITGA6	MAPK6
AL358113.1	GTPBP2	IL27RA	ITGB4	METRNL
AL365205.1	H3F3B	ITGA5	KLF5	MFAP2
AL445524.1	HIPK3	JUNB	LDLR	MICB
ALDH1A3	HMOX1	KCTD20	LEO1	MIR6516
ALG14	HOXB8	KLF10	LGALS1	MOSPD1
ALKBH8	ISCA2	KLF2	LIF	MSX1
AMMECR1	ITGA2	LIF	MACF1	MTF2
AMMECR1L	ITGA5	LIG4	MAP1LC3B	NCEH1
ANK2	ITGA6	MAPK6	MAPKAP1	NCKAP1
ANKRD33B	ITGB4	METRNL	MEX3C	NDFIP2
ANKRD50	KLF5	MFAP2	MIR21	NEU1
ANKRD52	LATS2	MICB	MIR6820	NGFR
ANLN	LDLR	MIR6516	MYEOV	PARP12
ANXA1	LEO1	MOSPD1	NCKAP1	PHETA1
AP000944.5	LGALS1	MRPL32	NCSTN	POLR2K
AP002807.1	LIF	MSX1	NDRG1	PPP2R1B
AP005263.1	MACF1	MTF2	NOP16	PTS
AP1AR	MAP1LC3B	NCEH1	PCGF2	RNA5SP202
APC	MAPKAP1	NCKAP1	PDLIM7	RNFT1
APOOL	MEX3C	NDFIP2	PLAUR	RNU6-2
ARF1	MIR21	NEU1	PLK3	SDC4
ARFGEF1	MIR6820	NGFR	PPTC7	SELENOI
ARFIP1	MT-TQ	OIP5-AS1	PRKCD	SERTAD1
ARHGAP12	MYEOV	PARP12	PSMG2	SLC2A1
ARHGAP27P1-BPTFP1-KPNA2P3	NCKAP1	PHETA1	RAB14	SLC36A1
ARHGEF10L	NCSTN	PHTF2	RAB22A	SLC37A3
ARHGEF7	NDRG1	PILRA	RABGGTB	SLC4A7
ARID2	NOP16	PIP5K1A	RBP1	SNAI1
ARID3A	PCGF2	POLR2K	RHEB	SYNRG
ARL5B	PDLIM7	PPP2R1B	RIC1	TAF13
ARL6IP1	PITPNC1	PTS	RTEL1-TNFRSF6B	TDG
ARL8A	PLAUR	RNA5SP202	S100A11	TGFBR1
ARL8B	PLK3	RNFT1	SCAMP2	TIMP1
ARMC7	PPTC7	RNU6-2	SERPINE1	TMEM98
ARNTL	PRKCD	SCARNA18	SERTAD1	TMTC3
ARPP19	PSMG2	SDC4	SH3BP2	TOR1A
ARRDC3	PSMG4	SELENOI	SLC2A1	TSNAX
ASAP1	PTMA	SERTAD1	SLC6A10P	UBASH3B
ATAD3B	PUM2	SKA1	SMIM29	UBE2B
ATP11B	RAB14	SLC2A1	SNX9	VCL
ATP13A2	RAB22A	SLC30A5	SPAG9	VSIR
ATP13A3	RABGGTB	SLC36A1	SPINDOC	YRDC
ATP1B1	RBP1	SLC37A3	SPRY4	ZNF503
ATP6V0B	RHEB	SLC4A7	TAOK1
ATP6V0E1	RIC1	SNAI1	TINAGL1
ATP6V1B2	RPL23AP42	SYNRG	TJP1
ATP6V1H	RTEL1-TNFRSF6B	TAF13	TNFAIP1
ATRN	S100A11	TAP2	TNFRSF10D
B3GNT2	SCAMP2	TDG	TNFRSF12A
B4GALNT1	SERPINE1	TGFBR1	TNFSF9
B4GALNT3	SERTAD1	TIMP1	TNS4
BAG4	SH3BP2	TMEM98	TOR1A
BAK1	SLC2A1	TMTC3	TRAPPC4
BAP1	SLC6A10P	TOR1A	TRIM8
BATF3	SMIM29	TSNAX	TSTA3
BAZ1A	SMURF2	UBASH3B	UBASH3B
BBS4	SNX9	UBE2B	UBE2A
BCL10	SPAG9	UBXN1	UBE2B
BHLHE40	SPINDOC	VCL	UPP1
BICDL1	SPRY4	VSIR	VCAN
BMI1	STC2	WDR45B	VSIR
BNIP2	SUMF2	YRDC	WWC1
BRAF	TAOK1	ZNF503	ZBTB4
BRD7	TGIF2		ZFYVE21
BRD7P2	TGM2		ZNF655
BRI3	TINAGL1		ZNF706
BTBD1	TJP1
BTG1	TMEM9B
BTG2	TNFAIP1
C17orf80	TNFRSF10D
C18orf21	TNFRSF12A
C1orf52	TNFSF9
C2CD2L	TNS2
C4B	TNS4
C6orf136	TOR1A
CA13	TRAPPC4
CA2	TRIM8
CALM2	TSTA3
CAMSAP2	UBASH3B
CAP1	UBE2A
CAPN5	UBE2B
CARMIL1	UPP1
CARNMT1	USP12
CASKIN2	VCAN
CASTOR2	VSIR
CBFB	WWC1
CC2D1B	ZBTB4
CCDC12	ZDHHC2
CCDC126	ZFP36L1
CCDC186	ZFYVE21
CCDC82	ZNF367
CCN1	ZNF655
CCN2	ZNF706
CCNE1
CCNE2
CCNG2
CCSAP
CD2AP
CD47
CD55
CD58
CDC123
CDC34
CDC42SE1
CDC42SE2
CDCP1
CDH1
CDK1
CDK12
CDK7
CDK8
CDKN1A
CDYL
CEMIP2
CENPC
CEP104
CEP135
CERT1
CHCHD7
CHMP6
CHST11
CHUK
CKS2
CLASP2
CLCN2
CLIC4
CLN8
CMIP
CNEP1R1
CNN3
CNOT6L
CNOT8
COG5
COMT
COQ10B
CREB3L2
CRIM1
CRYZ
CSF2RA
CSNK1G3
CTAGE9
CTSC
CTSL
CTU2
CXADR
CYP24A1
CYP4F11
CYTH1
CYTH2
DAAM1
DAB2
DCK
DCTN6
DCUN1D1
DCUN1D4
DENND1B
DENND3
DEPDC1B
DIP2B
DKK1
DLAT
DLGAP4
DNAJA2
DNAJB4
DNAJB9
DNAJC24
DOCK9
DPP8
DTX2
DUSP16
DUSP2
DUSP4
DUSP5
DUSP6
DUSP8
DVL1
E2F6
EAF1
EDEM3
EEA1
EFCAB14
EGR1
EHD1
EIF1P3
EIF3J
EIF4A3
EIF4E
EIF4ENIF1
ELK1
ELK3
ELOA
EMC2
EMC7
ENTPD7
EOGT
EPB41L4B
EPB41L5
EPC2
EPHA1
EPHA2
EPN2
EPS8L1
ERBB2
ERBIN
ERCC1
ERCC3
EREG
ERLEC1
ERP44
ESAM
ETFDH
ETS1
ETV5
EXOC6
EXOC8
EXT2
EXTL3
F3
FAM104A
FAM107B
FAM126A
FAM160B1
FAM169A
FAM177A1
FAM214B
FAM72A
FAM72B
FAM72C
FAM8A1
FBXO30
FBXW11
FCHSD1
FEM1C
FERMT2
FGD4
FGFR1OP
FGFR1OP2
FGFR2
FGFR3
FHL3
FKBP14
FLNC
FMNL2
FNIP1
FOSL1
FOXJ3
FOXN2
FP565260.6
FRG1
FRMD6
FRMD8
FTL
FUBP1
FUBP3
FUNDC1
FXR2
FZD6
GABARAPL1
GAL
GALNT2
GCLC
GCLM
GDPD1
GFOD1
GFPT2
GJB3
GMFB
GNAI1
GNAQ
GNL3
GNPTAB
GOLIM4
GOSR2
GPAT3
GPATCH1
GPCPD1
GRB10
GRHL1
GRK3
GSK3A
GSK3B
GTF2B
GTF3C4
GTPBP2
H3F3B
H3F3C
HBEGF
HELZ2
HERC4
HES1
HHEX
HIPK1
HIPK2
HIPK3
HK2
HLA-E
HMBOX1
HMGCR
HMGCS1
HMGN3
HMGXB4
HMOX1
HSPA13
HSPE1
HSPE1-MOB4
HSPE1P6
ID2
IER2
IFFO2
IFI30
IFNAR1
IFNGR2
IFRD1
IGF2R
IGSF3
IL13RA1
ILK
ILKAP
IMPA1
INPPL1
INSIG2
IPMK
IREB2
ISCA2
ISCU
ITCH
ITGA2
ITGA3
ITGA5
ITGA6
ITGB4
ITPKC
JAZF1
JMJD1C
JUNB
KCNK1
KCTD15
KCTD2
KDM2A
KDM5B
KDM6B
KIAA0355
KIAA1217
KIAA2026
KIF21A
KIF2A
KIF3B
KLC2
KLF10
KLF2
KLF5
KLHL21
KLK10
KLK6
KMT2E
KPNA2
KPNA4
KPNA5
KRAS
KRT15
KRT18
KRT8P3
LAMB3
LAMC2
LAMTOR5
LBR
LDB1
LDLR
LEMD3
LEO1
LEPROT
LETM2
LGALS1
LIF
LIFR
LIG4
LIMA1
LIN54
LINC00659
LINC02693
LIPH
LMBR1L
LMBRD1
LMX1B
LRCH1
LRCH3
LRP4
LRP5
LRP6
LRPAP1
LRRC37A
LRRC37A2
LSM1
LSM8
LYN
MACF1
MAFF
MAFG
MAP1LC3B
MAP1LC3B2
MAP2K1
MAP2K3
MAP3K2
MAP3K7
MAP4K3
MAPK6
MAPKAP1
MAPKAPK2
MAPRE1
MARK2
MARK4
MBD2
MBD6
MBIP
MCAM
MED1
MED13
MED17
MED28
MED31
MED4
MEF2A
MEGF9
METRNL
MEX3C
MFAP2
MFSD14B
MFSD9
MICB
MIER1
MINDY3
MINK1
MIR21
MIR4435-2HG
MIR6516
MIR6751
MIR6820
MISP
MKLN1
MKNK2
MLLT6
MND1
MOB1B
MOCS2
MON1A
MORC3
MOSPD1
MRPL22
MRPL39
MSL1
MSLN
MSRB1
MSTO2P
MSX1
MT1X
MTF2
MTM1
MTMR12
MTMR6
MYADM
MYBL1
MYEOV
MYL9
MYO1B
N6AMT1
NABP1
NAGK
NAMPT
NAMPTP1
NBN
NCEH1
NCKAP1
NCOA3
NCOA6
NCSTN
NDEL1
NDFIP1
NDFIP2
NDRG1
NECAP2
NEDD4
NEDD4L
NEO1
NETO2
NEU1
NFE2L3
NFKB2
NFKBIE
NGFR
NHLRC2
NINL
NIPA1
NOP16
NOTCH2NLA
NOTCH2NLB
NOTCH2NLC
NPAS2
NPC1
NPEPPS
NPTN
NR1H2
NR4A1
NTN1
NUDT4
NUFIP2
NUP98
ORMDL3
OSBP
OSBPL2
OSBPL9
OSGIN1
OXR1
P3H1
PAIP1
PANK3
PANX1
PAQR5
PARD6B
PARP12
PARP2
PBDC1
PCGF2
PCTP
PDCD10
PDE6D
PDGFA
PDGFB
PDLIM3
PDLIM7
PEA15
PEX14
PGM2L1
PGM3
PHACTR2
PHETA1
PIAS1
PIAS4
PIGG
PIKFYVE
PIP4K2C
PIP4P1
PLAGL2
PLAT
PLAUR
PLEKHA5
PLK3
PLOD2
PNRC1
POLR2A
POLR2B
POLR2J
POLR2K
POPDC3
PPARG
PPIH
PPM1A
PPM1B
PPP1R13L
PPP1R26
PPP1R9B
PPP2CB
PPP2R1B
PPP2R5B
PPP3R1
PPP4R2
PPP6R3
PPT2
PPTC7
PRAG1
PRKCD
PRKCH
PRKD3
PRR12
PRRC1
PRSS8
PSD3
PSEN2
PSMG2
PTP4A2P2
PTPRA
PTPRJ
PTPRK
PTS
QKI
RAB11A
RAB14
RAB18
RAB22A
RAB5B
RAB5IF
RABGGTB
RABL3
RAD1
RAD21
RALGAPB
RAP1B
RAPGEF5
RASA2
RASAL2
RBL1
RBM19
RBM24
RBM27
RBM38
RBMS1
RBP1
RCL1
RELB
RESF1
RGS14
RHEB
RHOF
RHOT1
RHPN2
RIC1
RIOK1
RMND5A
RNA5SP202
RNF11
RNF145
RNF216
RNF220
RNF38
RNFT1
RNU6-2
RNU6-33P
RNU6-36P
RNU6-3P
RNU6-4P
RNU6-5P
RNU6-6P
RNU6-7
RNU6-9
RPS6KA3
RRAS
RTEL1-TNFRSF6B
S100A11
SACM1L
SACS
SASH1
SASS6
SBDS
SBF1
SBF2
SBNO1
SBNO2
SCAMP2
SCML1
SCYL1
SCYL2
SDC4
SDCBP
SDE2
SDF2
SEC23A
SEC24A
SEC24B
SEC24D
SECISBP2L
SELENOI
SELENOS
SEPTIN6
SEPTIN7P3
SERPINE1
SERTAD1
SESN2
SETX
SFSWAP
SGPL1
SGTB
SH2B3
SH3BP2
SH3TC1
SHROOM1
SIN3A
SKIL
SLBP
SLC20A2
SLC25A12
SLC26A11
SLC2A1
SLC30A7
SLC36A1
SLC37A3
SLC3A2
SLC43A2
SLC4A7
SLC6A10P
SLC7A11
SLC7A6
SLC9A1
SMAD7
SMIM29
SNAI1
SNIP1
SNORD3B-1
SNX12
SNX25
SNX3
SNX30
SNX4
SNX9
SP100
SPAG9
SPC25
SPECC1
SPINDOC
SPINT1
SPIRE2
SPPL2A
SPRY2
SPRY4
SPSB1
SRPRB
SRSF6
ST14
STK24
STK38
STRN3
STXBP5
SUCO
SYNJ2
SYNRG
TACC1
TAF13
TAF1B
TAF4
TAF4B
TANC1
TAOK1
TAP1
TASOR2
TBC1D12
TBC1D13
TBC1D14
TBPL1
TBX18
TDG
TEP1
TEX10
TGFB1
TGFBR1
THBS1
THSD1
TIMP1
TIMP2
TINAGL1
TIPARP
TJP1
TLK1
TM9SF2
TMED7-TICAM2
TMEM128
TMEM167B
TMEM185B
TMEM248
TMEM41B
TMEM50A
TMEM92
TMEM98
TMSB10
TMTC3
TNFAIP1
TNFRSF10A
TNFRSF10B
TNFRSF10D
TNFRSF12A
TNFSF9
TNKS2
TNS4
TOB2
TOMM40L
TOMM70
TOPBP1
TOR1A
TPM4
TPMT
TRABD2A
TRAPPC10
TRAPPC4
TRIM8
TRIML2
TRIO
TSC22D2
TSNAX
TSPAN14
TSTA3
TTK
TUBB2A
TUBB6
TUBGCP3
TVP23B
TVP23C
TXLNG
TXNL1
TYW3
UAP1
UBA2
UBASH3B
UBE2A
UBE2B
UBE2G1
UBE2Z
UBL3
UBR1
UBTD2
UNC119
UNC50
UPP1
USP24
USP32
USP33
USP47
USP53
UTP20
VASP
VCAN
VCL
VEZF1
VGF
VPS13A
VPS13D
VPS37A
VPS54
VSIR
VTI1A
WAC
WBP11
WDR20
WDR26
WDR45
WNT7B
WRAP73
WTIP
WWC1
YOD1
YPEL5
YRDC
ZBTB38
ZBTB4
ZC3H15
ZFAND3
ZFAND5
ZFYVE21
ZHX1
ZNF503
ZNF655
ZNF697
ZNF706
ZRANB2
ZYX

## Sheet: Fig S2E
Figure S2E
		Statistical Significance:	p<0.000001	p<0.000001	p<0.000002508	p<0.000001
PUM1&2 RNAi	PRE	BOUND	[PRE] vs [BOUND]	[BOUND] vs [PUM1&2]	[PRE] vs [PUM1&2]	[PUM1&2] vs [PRE] vs [BOUND]
MARCH_6	MARCH_1	AAMP	AAMP	ABL2	MARCH_6	ABL2
7SK	MARCH_5	AASDHPPT	AASDHPPT	ACAP2	ABL2	ACAP2
A4GALT	MARCH_6	ABAT	ABCC5	ACBD5	ACAP2	ACBD5
ABHD17B	MARCH_7	ABCB1	ABHD10	AFF4	ACBD5	AGPAT5
ABL2	SEPT_1	ABCC5	ABHD13	AGPAT5	AGPAT5	AGPS
AC004997.1	SEPT_7	ABHD10	ABHD3	AGPS	AGPS	ANK2
AC006511.5	SEPT_8	ABHD13	ABHD5	AMMECR1L	ALKBH8	ANKRD50
AC009041.2	SEPT_10	ABHD3	ABI1	ANK2	AMMECR1	ANLN
AC009088.3	A1CF	ABHD5	ABI2	ANKRD50	ANK2	APC
AC010198.2	A2M	ABI1	ABL2	ANLN	ANKRD33B	ARF1
AC012213.5	AADACL3	ABI2	ABLIM1	APC	ANKRD50	ARFGEF1
AC012488.2	AAGAB	ABL2	ABLIM3	APOOL	ANKRD52	ARFIP1
AC027644.4	AAK1	ABLIM1	ACAP2	ARF1	ANLN	ARHGAP12
AC044839.3	AAMP	ABLIM3	ACBD3	ARFGEF1	AP1AR	ARHGEF7
AC051619.6	AASDH	ACAP2	ACBD5	ARFIP1	APC	ARID2
AC060771.1	AASDHPPT	ACBD3	ACHE	ARHGAP12	ARF1	ARL5B
AC068896.1	AASS	ACBD5	ACSL3	ARHGEF7	ARFGEF1	ARL6IP1
AC092143.1	ABCA1	ACBD6	ACSL4	ARID2	ARFIP1	ARL8A
AC093019.2	ABCA10	ACHE	ACTG1	ARL5B	ARHGAP12	ARL8B
AC099811.2	ABCA13	ACOT4	ACTR10	ARL6IP1	ARHGEF10L	ARNTL
AC110275.1	ABCA2	ACOT9	ACTR3	ARL8A	ARHGEF7	ASAP1
AC118553.2	ABCA4	ACSL3	ACTR3B	ARL8B	ARID2	ATP11B
AC136616.1	ABCA5	ACSL4	ACVR1B	ARNTL	ARID3A	ATP13A3
AC141586.1	ABCA6	ACTG1	ACVR2A	ASAP1	ARL5B	ATP6V1B2
ACAP2	ABCA8	ACTL6A	ACVR2B	ATP11B	ARL6IP1	ATRN
ACBD5	ABCA9	ACTR10	ADAM22	ATP13A3	ARL8A	BAG4
ADAMTSL4-AS1	ABCB11	ACTR1B	ADAM9	ATP6V1B2	ARL8B	BAP1
ADAMTSL5	ABCB5	ACTR3	ADAMTS1	ATP6V1H	ARNTL	BCL10
ADGRG6	ABCB7	ACTR3B	ADAMTS4	ATRN	ARPP19	BNIP2
AFF4	ABCC10	ACVR1	ADAMTS5	B3GNT2	ASAP1	BRD7
AGO2	ABCC2	ACVR1B	ADAMTS6	BAG4	ATP11B	BTBD1
AGPAT5	ABCC3	ACVR2A	ADAR	BAP1	ATP13A2	BTG1
AGPS	ABCC4	ACVR2B	ADCY10	BCL10	ATP13A3	C18orf21
AIFM2	ABCC5	ACYP1	ADCY7	BMI1	ATP1B1	C1orf52
AL049629.2	ABCC8	ADAM19	ADCY9	BNIP2	ATP6V1B2	C6orf136
AL049844.1	ABCC9	ADAM22	ADD3	BRAF	ATRN	CALM2
AL121758.1	ABCE1	ADAM9	ADIPOR2	BRD7	BAG4	CBFB
AL133500.1	ABCF1	ADAMTS1	ADM	BRI3	BAP1	CCDC12
AL138789.1	ABCF3	ADAMTS4	ADNP	BTBD1	BAZ1A	CCDC126
AL358113.1	ABCG1	ADAMTS5	ADNP2	BTG1	BCL10	CCDC82
AL365205.1	ABCG5	ADAMTS6	ADSS	C18orf21	BHLHE40	CCNE2
AL445524.1	ABHD10	ADAR	AEBP2	C1orf52	BNIP2	CCNG2
ALDH1A3	ABHD11	ADARB1	AFF1	C6orf136	BRD7	CD2AP
ALG14	ABHD12	ADCK2	AFF3	CA2	BTBD1	CD47
ALKBH8	ABHD12B	ADCY10	AFTPH	CALM2	BTG1	CD58
AMMECR1	ABHD13	ADCY3	AGA	CBFB	C18orf21	CDC123
AMMECR1L	ABHD2	ADCY7	AGAP3	CCDC12	C1orf52	CDC42SE2
ANK2	ABHD3	ADCY9	AGFG1	CCDC126	C6orf136	CDK7
ANKRD33B	ABHD5	ADD2	AGGF1	CCDC82	CA13	CDKN1A
ANKRD50	ABI1	ADD3	AGPAT3	CCNE2	CALM2	CEP135
ANKRD52	ABI2	ADIPOR2	AGPAT5	CCNG2	CAP1	CHUK
ANLN	ABI3BP	ADM	AGPS	CD2AP	CASKIN2	CKS2
ANXA1	ABL2	ADNP	AGTPBP1	CD47	CBFB	CLASP2
AP000944.5	ABLIM1	ADNP2	AHCTF1	CD55	CC2D1B	CLIC4
AP002807.1	ABLIM2	ADO	AHDC1	CD58	CCDC12	CMIP
AP005263.1	ABLIM3	ADSS	AHR	CDC123	CCDC126	CNOT8
AP1AR	ABR	AEBP2	AHSA1	CDC42SE2	CCDC82	COQ10B
APC	ABRA	AFAP1L2	AHSG	CDK7	CCNE2	CREB3L2
APOOL	ACAD8	AFF1	AICDA	CDKN1A	CCNG2	CRIM1
ARF1	ACADL	AFF3	AIG1	CEP135	CD2AP	CSNK1G3
ARFGEF1	ACADM	AFF4	AIP	CHUK	CD47	CXADR
ARFIP1	ACADSB	AFTPH	AKAP1	CKS2	CD58	CYTH1
ARHGAP12	ACAN	AGA	AKAP12	CLASP2	CDC123	DAB2
ARHGAP27P1-BPTFP1-KPNA2P3	ACAP2	AGAP3	AKAP13	CLIC4	CDC42SE2	DCK
ARHGEF10L	ACBD3	AGFG1	AKAP7	CMIP	CDH1	DCUN1D1
ARHGEF7	ACBD5	AGGF1	AKT2	CNOT8	CDK1	DCUN1D4
ARID2	ACBD7	AGPAT3	AKT3	COG5	CDK12	DEPDC1B
ARID3A	ACCSL	AGPAT5	AKTIP	COQ10B	CDK7	DIP2B
ARL5B	ACHE	AGPS	ALG10	CREB3L2	CDK8	DKK1
ARL6IP1	ACOT11	AGTPBP1	ALG10B	CRIM1	CDKN1A	DLAT
ARL8A	ACOXL	AGXT	AMIGO2	CSNK1G3	CEP135	DLGAP4
ARL8B	ACP1	AHCTF1	AMOTL1	CXADR	CHCHD7	DNAJA2
ARMC7	ACP6	AHCYL2	AMOTL2	CYTH1	CHST11	DNAJC24
ARNTL	ACSL1	AHDC1	ANAPC13	DAB2	CHUK	DOCK9
ARPP19	ACSL3	AHR	ANGEL2	DCK	CKS2	DUSP16
ARRDC3	ACSL4	AHSA1	ANGPT1	DCTN6	CLASP2	DUSP6
ASAP1	ACSL5	AHSG	ANK2	DCUN1D1	CLCN2	DUSP8
ATAD3B	ACSL6	AICDA	ANK3	DCUN1D4	CLIC4	E2F6
ATP11B	ACSS3	AIFM1	ANKH	DEPDC1B	CLN8	EDEM3
ATP13A2	ACTA1	AIG1	ANKLE2	DIP2B	CMIP	EEA1
ATP13A3	ACTA2	AIP	ANKRD10	DKK1	CNOT6L	EGR1
ATP1B1	ACTB	AK2	ANKRD12	DLAT	CNOT8	EIF3J
ATP6V0B	ACTC1	AKAP1	ANKRD17	DLGAP4	COQ10B	EIF4A3
ATP6V0E1	ACTG1	AKAP12	ANKRD36B	DNAJA2	CREB3L2	EIF4E
ATP6V1B2	ACTN1	AKAP13	ANKRD40	DNAJC24	CRIM1	EIF4ENIF1
ATP6V1H	ACTR10	AKAP7	ANKRD50	DOCK9	CSNK1G3	ELK1
ATRN	ACTR2	AKAP8	ANKS1B	DUSP16	CTAGE9	ENTPD7
B3GNT2	ACTR3	AKT2	ANLN	DUSP6	CTSC	EPB41L4B
B4GALNT1	ACTR3B	AKT3	ANO5	DUSP8	CXADR	EPC2
B4GALNT3	ACTR5	AKTIP	ANP32A	E2F6	CYP24A1	ERCC3
BAG4	ACTR6	ALB	ANP32B	EDEM3	CYP4F11	ETFDH
BAK1	ACVR1B	ALDH1A2	ANP32E	EEA1	CYTH1	EXOC6
BAP1	ACVR1C	ALDOB	AOC3	EGR1	DAAM1	EXOC8
BATF3	ACVR2A	ALG10	AP1S1	EIF3J	DAB2	F3
BAZ1A	ACVR2B	ALG10B	AP1S3	EIF4A3	DCK	FAM104A
BBS4	ACVRL1	ALKBH1	AP3M2	EIF4E	DCUN1D1	FAM107B
BCL10	ADAM10	ALPL	APBB2	EIF4ENIF1	DCUN1D4	FAM126A
BHLHE40	ADAM11	ALS2CL	APC	ELK1	DENND1B	FAM177A1
BICDL1	ADAM12	AMH	API5	ENTPD7	DENND3	FAM72B
BMI1	ADAM17	AMIGO2	APP	EPB41L4B	DEPDC1B	FBXO30
BNIP2	ADAM22	AMMECR1L	APPL1	EPC2	DIP2B	FBXW11
BRAF	ADAM23	AMOTL1	AQP3	ERCC3	DKK1	FEM1C
BRD7	ADAM32	AMOTL2	ARAF	ETFDH	DLAT	FERMT2
BRD7P2	ADAM33	AMPH	ARCN1	EXOC6	DLGAP4	FGD4
BRI3	ADAM8	ANAPC10	AREG	EXOC8	DNAJA2	FGFR1OP2
BTBD1	ADAM9	ANAPC13	ARF1	F3	DNAJB4	FGFR2
BTG1	ADAMTS1	ANGEL2	ARF6	FAM104A	DNAJB9	FNIP1
BTG2	ADAMTS10	ANGPT1	ARFGAP3	FAM107B	DNAJC24	FOXN2
C17orf80	ADAMTS12	ANK2	ARFGEF1	FAM126A	DOCK9	FRMD6
C18orf21	ADAMTS18	ANK3	ARFGEF2	FAM177A1	DUSP16	FUNDC1
C1orf52	ADAMTS19	ANKAR	ARFIP1	FAM72B	DUSP4	FZD6
C2CD2L	ADAMTS20	ANKFN1	ARGLU1	FBXO30	DUSP6	GCLC
C4B	ADAMTS3	ANKH	ARHGAP12	FBXW11	DUSP8	GCLM
C6orf136	ADAMTS4	ANKHD1	ARHGAP28	FEM1C	DVL1	GNAI1
CA13	ADAMTS5	ANKLE2	ARHGAP5	FERMT2	E2F6	GNPTAB
CA2	ADAMTS6	ANKRD10	ARHGEF11	FGD4	EAF1	GRB10
CALM2	ADAMTS9	ANKRD12	ARHGEF12	FGFR1OP2	EDEM3	GRHL1
CAMSAP2	ADAMTSL1	ANKRD16	ARHGEF19	FGFR2	EEA1	GSK3A
CAP1	ADAMTSL3	ANKRD17	ARHGEF3	FNIP1	EGR1	GSK3B
CAPN5	ADAR	ANKRD36B	ARHGEF7	FOXN2	EIF3J	GTF2B
CARMIL1	ADARB2	ANKRD40	ARID1B	FRMD6	EIF4A3	GTPBP2
CARNMT1	ADAT2	ANKRD50	ARID2	FUNDC1	EIF4E	HERC4
CASKIN2	ADCK3	ANKRD9	ARID4A	FXR2	EIF4ENIF1	HHEX
CASTOR2	ADCK4	ANKS1B	ARID4B	FZD6	ELK1	HIPK2
CBFB	ADCY1	ANLN	ARID5B	GCLC	ENTPD7	HK2
CC2D1B	ADCY10	ANO10	ARL5A	GCLM	EPB41L4B	HMGCR
CCDC12	ADCY2	ANO5	ARL5B	GMFB	EPB41L5	HSPA13
CCDC126	ADCY5	ANO6	ARL6	GNAI1	EPC2	ID2
CCDC186	ADCY7	ANP32A	ARL6IP1	GNAQ	EPHA1	IFFO2
CCDC82	ADCY9	ANP32B	ARL6IP5	GNPTAB	ERCC3	IFNAR1
CCN1	ADCYAP1	ANP32E	ARL6IP6	GOLIM4	EREG	IFNGR2
CCN2	ADCYAP1R1	ANXA5	ARL8A	GRB10	ERLEC1	IFRD1
CCNE1	ADD1	AOC3	ARL8B	GRHL1	ETFDH	IGF2R
CCNE2	ADD3	AP1G1	ARMC1	GSK3A	ETS1	ILKAP
CCNG2	ADH1B	AP1S1	ARMCX6	GSK3B	ETV5	IMPA1
CCSAP	ADH4	AP1S3	ARNTL	GTF2B	EXOC6	INSIG2
CD2AP	ADHFE1	AP3M2	ARPC5	GTF3C4	EXOC8	IPMK
CD47	ADIPOR2	AP4S1	ARRDC1	GTPBP2	EXTL3	IREB2
CD55	ADK	APBB2	ARSK	H3F3B	F3	ISCU
CD58	ADM	APC	ARV1	HBEGF	FAM104A	ITCH
CDC123	ADNP	APEX1	ASAH1	HERC4	FAM107B	ITGA2
CDC34	ADNP2	APEX2	ASAP1	HHEX	FAM126A	ITGA6
CDC42SE1	ADRA1A	API5	ASAP2	HIPK2	FAM160B1	JAZF1
CDC42SE2	ADRA1B	APIP	ASCC2	HK2	FAM169A	JMJD1C
CDCP1	ADRA1D	APOLD1	ASCC3	HMGCR	FAM177A1	KCNK1
CDH1	ADRA2A	APOOL	ASF1A	HMOX1	FAM72A	KIAA1217
CDK1	ADRB1	APP	ASH1L	HSPA13	FAM72B	KIAA2026
CDK12	ADRBK2	APPL1	ASPH	ID2	FAM8A1	KIF21A
CDK7	ADRM1	AQP3	ASPM	IFFO2	FBXO30	KLF10
CDK8	ADSS	ARAF	ASXL1	IFNAR1	FBXW11	KLF5
CDKN1A	ADSSL1	ARCN1	ASXL2	IFNGR2	FEM1C	KPNA2
CDYL	AEBP2	AREG	ATAD1	IFRD1	FERMT2	KPNA4
CEMIP2	AES	ARF1	ATAD2	IGF2R	FGD4	LBR
CENPC	AFAP1	ARF4	ATF2	ILKAP	FGFR1OP	LEMD3
CEP104	AFF1	ARF6	ATF7IP	IMPA1	FGFR1OP2	LIFR
CEP135	AFF2	ARFGAP3	ATG10	INSIG2	FGFR2	LIG4
CERT1	AFF3	ARFGEF1	ATG3	IPMK	FGFR3	LIN54
CHCHD7	AFG3L2	ARFGEF2	ATL1	IREB2	FKBP14	LMBRD1
CHMP6	AFTPH	ARFIP1	ATL2	ISCU	FMNL2	LMX1B
CHST11	AGA	ARGLU1	ATM	ITCH	FNIP1	LRP5
CHUK	AGAP1	ARHGAP12	ATMIN	ITGA2	FOXJ3	LSM1
CKS2	AGAP3	ARHGAP25	ATP11A	ITGA6	FOXN2	LYN
CLASP2	AGBL2	ARHGAP28	ATP11B	JAZF1	FRMD6	MAFG
CLCN2	AGBL3	ARHGAP5	ATP11C	JMJD1C	FUBP1	MAP1LC3B
CLIC4	AGBL4	ARHGDIB	ATP13A3	KCNK1	FUBP3	MAP4K3
CLN8	AGER	ARHGEF11	ATP1B3	KIAA1217	FUNDC1	MAPK6
CMIP	AGFG1	ARHGEF12	ATP2A1	KIAA2026	FZD6	MAPKAP1
CNEP1R1	AGGF1	ARHGEF19	ATP2B1	KIF21A	GALNT2	MARK4
CNN3	AGK	ARHGEF2	ATP5C1	KLF10	GCLC	MBIP
CNOT6L	AGL	ARHGEF3	ATP5G3	KLF5	GCLM	MED13
CNOT8	AGPAT3	ARHGEF7	ATP5S	KPNA2	GDPD1	MED17
COG5	AGPAT5	ARID1B	ATP6AP1	KPNA4	GNAI1	MED28
COMT	AGPS	ARID2	ATP6AP2	KPNA5	GNL3	MED4
COQ10B	AGT	ARID4A	ATP6V1B2	LBR	GNPTAB	MEGF9
CREB3L2	AGTPBP1	ARID4B	ATP6V1C1	LEMD3	GPATCH1	MIER1
CRIM1	AGTR1	ARID5B	ATP9A	LIFR	GPCPD1	MKLN1
CRYZ	AHCTF1	ARL1	ATR	LIG4	GRB10	MKNK2
CSF2RA	AHDC1	ARL5A	ATRN	LIN54	GRHL1	MND1
CSNK1G3	AHI1	ARL5B	ATRNL1	LMBRD1	GSK3A	MORC3
CTAGE9	AHNAK	ARL6	ATXN1L	LMX1B	GSK3B	MRPL22
CTSC	AHR	ARL6IP1	ATXN2	LRCH3	GTF2B	MSX1
CTSL	AHSA1	ARL6IP5	ATXN7	LRP5	GTPBP2	MTF2
CTU2	AHSG	ARL6IP6	AURKA	LSM1	HERC4	MTM1
CXADR	AICDA	ARL8A	AXIN1	LYN	HES1	MTMR12
CYP24A1	AIDA	ARL8B	AXIN2	MAFG	HHEX	MTMR6
CYP4F11	AIG1	ARMC1	AZI2	MAP1LC3B	HIPK1	NCKAP1
CYTH1	AIM1	ARMC10	AZIN1	MAP2K1	HIPK2	NCOA3
CYTH2	AIMP1	ARMC9	B3GNT5	MAP4K3	HK2	NCOA6
DAAM1	AIP	ARMCX2	B4GALT1	MAPK6	HMBOX1	NDEL1
DAB2	AK3	ARMCX3	B4GALT5	MAPKAP1	HMGCR	NDFIP1
DCK	AK5	ARMCX6	B4GALT6	MAPKAPK2	HMGCS1	NHLRC2
DCTN6	AK7	ARNTL	BAALC	MAPRE1	HMGN3	NIPA1
DCUN1D1	AKAP1	ARPC3	BACH1	MARK4	HMGXB4	NPC1
DCUN1D4	AKAP10	ARPC5	BACH2	MBIP	HSPA13	NPEPPS
DENND1B	AKAP11	ARPC5L	BAG4	MED13	HSPE1	NR4A1
DENND3	AKAP12	ARRDC1	BAHCC1	MED17	ID2	NUDT4
DEPDC1B	AKAP13	ARSK	BAHD1	MED28	IFFO2	NUFIP2
DIP2B	AKAP2	ARTN	BAIAP2	MED4	IFNAR1	NUP98
DKK1	AKAP5	ARV1	BAIAP2L1	MEGF9	IFNGR2	OSBPL9
DLAT	AKAP6	ASAH1	BAP1	MIER1	IFRD1	OXR1
DLGAP4	AKAP7	ASAP1	BAZ2B	MKLN1	IGF2R	PAIP1
DNAJA2	AKAP8L	ASAP2	BBC3	MKNK2	ILKAP	PANK3
DNAJB4	AKAP9	ASB1	BBS10	MND1	IMPA1	PARD6B
DNAJB9	AKIRIN1	ASB8	BBS7	MORC3	INSIG2	PARP2
DNAJC24	AKIRIN2	ASCC2	BCAP29	MRPL22	IPMK	PDCD10
DOCK9	AKNA	ASCC3	BCAR1	MRPL39	IREB2	PDE6D
DPP8	AKR1C2	ASF1A	BCAR3	MSX1	ISCA2	PDLIM3
DTX2	AKT2	ASH1L	BCAS3	MTF2	ISCU	PEA15
DUSP16	AKT3	ASNSD1	BCKDHB	MTM1	ITCH	PEX14
DUSP2	AKTIP	ASPH	BCL10	MTMR12	ITGA2	PHACTR2
DUSP4	ALAS1	ASPM	BCL11A	MTMR6	ITGA3	PIAS1
DUSP5	ALCAM	ASTE1	BCL2L1	MYADM	ITGA6	PLEKHA5
DUSP6	ALDH1A1	ASXL1	BCL2L11	NCKAP1	JAZF1	PNRC1
DUSP8	ALDH1L2	ASXL2	BCL3	NCOA3	JMJD1C	POLR2B
DVL1	ALDH6A1	ATAD1	BCL6	NCOA6	KCNK1	POLR2J
E2F6	ALDH7A1	ATAD2	BCL9L	NDEL1	KDM2A	PPIH
EAF1	ALDH9A1	ATF2	BCOR	NDFIP1	KDM6B	PPM1A
EDEM3	ALG1	ATF7IP	BEND7	NETO2	KIAA0355	PPM1B
EEA1	ALG10	ATG10	BEX4	NHLRC2	KIAA1217	PPP1R9B
EFCAB14	ALG10B	ATG3	BICD1	NIPA1	KIAA2026	PPP2R1B
EGR1	ALG2	ATL1	BLCAP	NPC1	KIF21A	PPP3R1
EHD1	ALG5	ATL2	BLOC1S2	NPEPPS	KIF2A	PPTC7
EIF1P3	ALG6	ATM	BLZF1	NR4A1	KLC2	PRKCD
EIF3J	ALG9	ATMIN	BMP2	NUDT4	KLF10	PRKD3
EIF4A3	ALKBH8	ATN1	BMPR1B	NUFIP2	KLF2	PRR12
EIF4E	ALLC	ATP11A	BMPR2	NUP98	KLF5	PRRC1
EIF4ENIF1	ALMS1	ATP11B	BNIP2	ORMDL3	KLHL21	PSD3
ELK1	ALPK1	ATP11C	BNIP3L	OSBPL9	KPNA2	PSMG2
ELK3	ALPK2	ATP13A3	BPTF	OXR1	KPNA4	PTPRA
ELOA	ALPK3	ATP1B3	BRD1	PAIP1	KRAS	PTPRJ
EMC2	ALS2	ATP2A1	BRD2	PANK3	LAMC2	QKI
EMC7	ALS2CR11	ATP2B1	BRD3	PARD6B	LBR	RAB11A
ENTPD7	AMD1	ATP5C1	BRD7	PARP2	LDLR	RAB14
EOGT	AMDHD1	ATP5G3	BRMS1L	PDCD10	LEMD3	RAB18
EPB41L4B	AMHR2	ATP5S	BRPF1	PDE6D	LEPROT	RAB22A
EPB41L5	AMIGO2	ATP6AP1	BRPF3	PDLIM3	LIFR	RAB5B
EPC2	AMMECR1	ATP6AP2	BRWD1	PEA15	LIG4	RABGGTB
EPHA1	AMN1	ATP6V1B2	BTAF1	PEX14	LIMA1	RABL3
EPHA2	AMOTL1	ATP6V1C1	BTBD1	PHACTR2	LIN54	RAD1
EPN2	AMOTL2	ATP6V1G1	BTBD2	PIAS1	LMBRD1	RAD21
EPS8L1	AMTN	ATP6V1H	BTBD3	PLAT	LMX1B	RAP1B
ERBB2	AMY1A	ATP8B2	BTBD7	PLEKHA5	LRCH1	RASAL2
ERBIN	AMY2B	ATP9A	BTG1	PNRC1	LRP5	RBM27
ERCC1	AMZ2	ATR	BTNL8	POLR2B	LRP6	RBMS1
ERCC3	ANAPC1	ATRN	BUB1	POLR2J	LSM1	RCL1
EREG	ANAPC13	ATRNL1	BUB1B	POLR2K	LYN	RHEB
ERLEC1	ANAPC16	ATXN1L	BUB3	PPIH	MACF1	RHOF
ERP44	ANAPC4	ATXN2	C10orf88	PPM1A	MAFG	RHOT1
ESAM	ANGEL1	ATXN7	C12orf29	PPM1B	MAP1LC3B	RHPN2
ETFDH	ANGEL2	AUH	C12orf4	PPP1R9B	MAP2K3	RIOK1
ETS1	ANGPT1	AURKA	C12orf66	PPP2R1B	MAP3K2	RMND5A
ETV5	ANGPT2	AXIN1	C14orf119	PPP3R1	MAP3K7	RNF216
EXOC6	ANGPTL1	AXIN2	C14orf2	PPP4R2	MAP4K3	RPS6KA3
EXOC8	ANGPTL2	AZI2	C14orf37	PPTC7	MAPK6	SACM1L
EXT2	ANGPTL3	AZIN1	C14orf79	PRKCD	MAPKAP1	SACS
EXTL3	ANGPTL7	B3GAT2	C15orf40	PRKD3	MARK2	SASH1
F3	ANK2	B3GNT2	C15orf61	PRR12	MARK4	SASS6
FAM104A	ANK3	B3GNT5	C16orf52	PRRC1	MBD2	SBF2
FAM107B	ANKFY1	B4GALT1	C16orf70	PSD3	MBIP	SBNO1
FAM126A	ANKH	B4GALT5	C16orf87	PSMG2	MCAM	SCML1
FAM160B1	ANKIB1	B4GALT6	C17orf58	PTPRA	MED1	SEC23A
FAM169A	ANKLE2	BAALC	C18orf21	PTPRJ	MED13	SEC24A
FAM177A1	ANKMY2	BACE2	C18orf25	PTS	MED17	SEC24B
FAM214B	ANKRA2	BACH1	C18orf54	QKI	MED28	SEC24D
FAM72A	ANKRD1	BACH2	C1orf52	RAB11A	MED31	SETX
FAM72B	ANKRD10	BAG3	C21orf91	RAB14	MED4	SIN3A
FAM72C	ANKRD11	BAG4	C2orf49	RAB18	MEF2A	SLBP
FAM8A1	ANKRD12	BAHCC1	C3orf33	RAB22A	MEGF9	SLC20A2
FBXO30	ANKRD13A	BAHD1	C3orf58	RAB5B	MEX3C	SLC25A12
FBXW11	ANKRD13C	BAIAP2	C4orf33	RABGGTB	MICB	SLC2A1
FCHSD1	ANKRD17	BAIAP2L1	C4orf46	RABL3	MIER1	SLC30A7
FEM1C	ANKRD18A	BAP1	C5orf15	RAD1	MINK1	SLC37A3
FERMT2	ANKRD20A3	BARD1	C5orf24	RAD21	MKLN1	SLC4A7
FGD4	ANKRD20A4	BAZ2A	C6orf1	RAP1B	MKNK2	SLC7A11
FGFR1OP	ANKRD20A8P	BAZ2B	C6orf106	RASAL2	MLLT6	SLC7A6
FGFR1OP2	ANKRD22	BBC3	C6orf136	RBM27	MND1	SMAD7
FGFR2	ANKRD26	BBS10	C7orf31	RBMS1	MORC3	SNX12
FGFR3	ANKRD26P1	BBS7	C8orf34	RCL1	MOSPD1	SNX25
FHL3	ANKRD27	BCAP29	C9orf78	RHEB	MRPL22	SNX30
FKBP14	ANKRD28	BCAR1	CA8	RHOF	MSL1	SNX4
FLNC	ANKRD31	BCAR3	CAB39	RHOT1	MSX1	SNX9
FMNL2	ANKRD33B	BCAS2	CACNB2	RHPN2	MT1X	SPC25
FNIP1	ANKRD34B	BCAS3	CACNB4	RIOK1	MTF2	SPIRE2
FOSL1	ANKRD34C	BCDIN3D	CADM1	RMND5A	MTM1	SPRY2
FOXJ3	ANKRD36	BCKDHB	CADPS2	RNF145	MTMR12	STK24
FOXN2	ANKRD36B	BCL10	CALCOCO2	RNF216	MTMR6	STRN3
FP565260.6	ANKRD36BP2	BCL11A	CALCRL	RPS6KA3	MYBL1	TAF1B
FRG1	ANKRD40	BCL2L1	CALD1	SACM1L	MYO1B	TAF4
FRMD6	ANKRD42	BCL2L11	CALM1	SACS	NCEH1	TAF4B
FRMD8	ANKRD44	BCL2L2	CALM2	SASH1	NCKAP1	TANC1
FTL	ANKRD45	BCL3	CALM3	SASS6	NCOA3	TBC1D12
FUBP1	ANKRD46	BCL6	CALU	SBDS	NCOA6	TBC1D14
FUBP3	ANKRD49	BCL9L	CAMK2D	SBF2	NCSTN	TBX18
FUNDC1	ANKRD50	BCOR	CAMKK2	SBNO1	NDEL1	TEP1
FXR2	ANKRD52	BEND7	CAMTA2	SCAMP2	NDFIP1	TLK1
FZD6	ANKRD55	BEX4	CAND1	SCML1	NDFIP2	TM9SF2
GABARAPL1	ANKRD6	BICD1	CANX	SEC23A	NEDD4	TMEM128
GAL	ANKRD7	BID	CAPN2	SEC24A	NEDD4L	TMEM185B
GALNT2	ANKS1A	BIRC3	CAPN7	SEC24B	NFE2L3	TMEM41B
GCLC	ANKS1B	BIRC6	CAPRIN1	SEC24D	NHLRC2	TMTC3
GCLM	ANKS4B	BLCAP	CAPS2	SETX	NINL	TNKS2
GDPD1	ANKS6	BLMH	CAPZA2	SIN3A	NIPA1	TOB2
GFOD1	ANKZF1	BLOC1S2	CASC4	SLBP	NOP16	TOPBP1
GFPT2	ANLN	BLZF1	CASD1	SLC20A2	NPAS2	TRAPPC10
GJB3	ANO1	BMI1	CASK	SLC25A12	NPC1	TRAPPC4
GMFB	ANO3	BMP2	CASP3	SLC2A1	NPEPPS	TRIO
GNAI1	ANO4	BMP2K	CASQ2	SLC30A7	NPTN	TSC22D2
GNAQ	ANO5	BMPR1B	CAV1	SLC37A3	NR4A1	TSNAX
GNL3	ANP32A	BMPR2	CBFB	SLC3A2	NUDT4	TTK
GNPTAB	ANP32B	BNIP2	CBL	SLC4A7	NUFIP2	TUBGCP3
GOLIM4	ANP32E	BNIP3L	CBWD1	SLC7A11	NUP98	TXNL1
GOSR2	ANPEP	BOK	CBX3	SLC7A6	OSBP	UBA2
GPAT3	ANTXR1	BPTF	CBX4	SMAD7	OSBPL9	UBE2A
GPATCH1	ANTXR2	BRAF	CBX8	SNX12	OXR1	UBE2G1
GPCPD1	ANXA11	BRD1	CCAR1	SNX25	PAIP1	UBE2Z
GRB10	ANXA2P3	BRD2	CCDC117	SNX30	PANK3	UBL3
GRHL1	AOC3	BRD3	CCDC12	SNX4	PARD6B	UBTD2
GRK3	AP1AR	BRD7	CCDC125	SNX9	PARP2	UNC119
GSK3A	AP1S1	BRI3	CCDC126	SPC25	PCGF2	UNC50
GSK3B	AP1S3	BRMS1L	CCDC14	SPIRE2	PDCD10	USP32
GTF2B	AP2B1	BRPF1	CCDC25	SPRY2	PDE6D	USP33
GTF3C4	AP2M1	BRPF3	CCDC43	STK24	PDGFB	USP53
GTPBP2	AP3M2	BRWD1	CCDC50	STRN3	PDLIM3	VCAN
H3F3B	AP4B1	BSDC1	CCDC6	TAF1B	PEA15	VPS54
H3F3C	AP4E1	BTAF1	CCDC61	TAF4	PEX14	WAC
HBEGF	APAF1	BTBD1	CCDC77	TAF4B	PGM2L1	WBP11
HELZ2	APBA1	BTBD2	CCDC82	TANC1	PGM3	WDR26
HERC4	APBA2	BTBD3	CCNA2	TBC1D12	PHACTR2	WWC1
HES1	APBB1IP	BTBD7	CCNB2	TBC1D14	PIAS1	YOD1
HHEX	APBB2	BTG1	CCND2	TBPL1	PIKFYVE	ZBTB38
HIPK1	APC	BTG3	CCNE2	TBX18	PLEKHA5	ZC3H15
HIPK2	APC2	BTN3A3	CCNG2	TEP1	PLOD2	ZHX1
HIPK3	APCDD1	BTNL8	CCNH	TIMP2	PNRC1	ZNF503
HK2	APH1B	BUB1	CCNL1	TLK1	POLR2A	ZNF706
HLA-E	API5	BUB1B	CCNT2	TM9SF2	POLR2B	ZRANB2
HMBOX1	APLF	BUB3	CCNY	TMEM128	POLR2J
HMGCR	APLN	C10orf11	CCR5	TMEM167B	PPIH
HMGCS1	APOBEC4	C10orf88	CCR6	TMEM185B	PPM1A
HMGN3	APOF	C11orf58	CD2AP	TMEM41B	PPM1B
HMGXB4	APOL3	C11orf63	CD46	TMTC3	PPP1R13L
HMOX1	APOL6	C12orf29	CD47	TNFRSF10B	PPP1R9B
HSPA13	APP	C12orf4	CD58	TNFRSF10D	PPP2CB
HSPE1	APPBP2	C12orf49	CD9	TNKS2	PPP2R1B
HSPE1-MOB4	APPL1	C12orf66	CDC123	TOB2	PPP3R1
HSPE1P6	APTX	C14orf119	CDC14A	TOPBP1	PPP6R3
ID2	AQP2	C14orf2	CDC14B	TRAPPC10	PPTC7
IER2	AQP3	C14orf37	CDC27	TRAPPC4	PRKCD
IFFO2	AQP4	C14orf79	CDC42EP3	TRIO	PRKD3
IFI30	AQP6	C15orf40	CDC42SE2	TSC22D2	PRR12
IFNAR1	AQR	C15orf61	CDC7	TSNAX	PRRC1
IFNGR2	AR	C16orf52	CDCA7	TTK	PSD3
IFRD1	ARAF	C16orf62	CDCA8	TUBGCP3	PSMG2
IGF2R	ARAP1	C16orf70	CDH18	TXNL1	PTPRA
IGSF3	ARAP2	C16orf72	CDH2	UBA2	PTPRJ
IL13RA1	ARCN1	C16orf87	CDH7	UBASH3B	PTPRK
ILK	AREG	C17orf58	CDK6	UBE2A	QKI
ILKAP	ARF1	C18orf21	CDK7	UBE2B	RAB11A
IMPA1	ARF3	C18orf25	CDKN1A	UBE2G1	RAB14
INPPL1	ARF6	C18orf32	CDKN1B	UBE2Z	RAB18
INSIG2	ARFGAP3	C18orf54	CDKN2AIP	UBL3	RAB22A
IPMK	ARFGEF1	C1GALT1	CDON	UBTD2	RAB5B
IREB2	ARFGEF2	C1GALT1C1	CDR2	UNC119	RABGGTB
ISCA2	ARFIP1	C1orf131	CDS2	UNC50	RABL3
ISCU	ARG1	C1orf27	CEBPB	USP32	RAD1
ITCH	ARG2	C1orf35	CEBPD	USP33	RAD21
ITGA2	ARGLU1	C1orf43	CENPA	USP53	RALGAPB
ITGA3	ARHGAP11A	C1orf52	CENPE	VCAN	RAP1B
ITGA5	ARHGAP12	C20orf24	CENPJ	VCL	RAPGEF5
ITGA6	ARHGAP17	C21orf91	CENPN	VPS54	RASA2
ITGB4	ARHGAP18	C2orf49	CEP120	WAC	RASAL2
ITPKC	ARHGAP21	C2orf61	CEP135	WBP11	RBM24
JAZF1	ARHGAP23	C3AR1	CEP170	WDR20	RBM27
JMJD1C	ARHGAP24	C3orf33	CEP290	WDR26	RBMS1
JUNB	ARHGAP26	C3orf58	CEP350	WDR45	RCL1
KCNK1	ARHGAP28	C4orf32	CEP70	WWC1	RELB
KCTD15	ARHGAP29	C4orf33	CEP76	YOD1	RGS14
KCTD2	ARHGAP31	C4orf46	CERK	ZBTB38	RHEB
KDM2A	ARHGAP32	C5orf15	CGGBP1	ZC3H15	RHOF
KDM5B	ARHGAP39	C5orf24	CHD1	ZFAND3	RHOT1
KDM6B	ARHGAP42	C6orf1	CHD2	ZHX1	RHPN2
KIAA0355	ARHGAP44	C6orf106	CHD7	ZNF503	RIOK1
KIAA1217	ARHGAP5	C6orf136	CHD9	ZNF706	RMND5A
KIAA2026	ARHGAP8	C6orf141	CHEK1	ZRANB2	RNF216
KIF21A	ARHGEF10	C6orf203	CHEK2		RNF220
KIF2A	ARHGEF10L	C7orf31	CHIC1		RNF38
KIF3B	ARHGEF11	C8orf34	CHM		RPS6KA3
KLC2	ARHGEF12	C8orf37	CHMP1A		RRAS
KLF10	ARHGEF15	C9orf40	CHMP2B		SACM1L
KLF2	ARHGEF16	C9orf64	CHMP4C		SACS
KLF5	ARHGEF18	C9orf78	CHMP7		SASH1
KLHL21	ARHGEF19	CA12	CHN2		SASS6
KLK10	ARHGEF26	CA2	CHRAC1		SBF1
KLK6	ARHGEF3	CA8	CHST9		SBF2
KMT2E	ARHGEF33	CAB39	CHSY1		SBNO1
KPNA2	ARHGEF37	CACHD1	CHSY3		SBNO2
KPNA4	ARHGEF38	CACNA1A	CHUK		SCML1
KPNA5	ARHGEF6	CACNA1D	CISD1		SCYL1
KRAS	ARHGEF7	CACNB2	CISD2		SCYL2
KRT15	ARHGEF9	CACNB4	CISD3		SDCBP
KRT18	ARID1A	CADM1	CKAP2L		SEC23A
KRT8P3	ARID1B	CADM4	CKAP5		SEC24A
LAMB3	ARID2	CADPS2	CKS2		SEC24B
LAMC2	ARID3A	CALCOCO2	CLASP1		SEC24D
LAMTOR5	ARID4A	CALCRL	CLASP2		SECISBP2L
LBR	ARID4B	CALD1	CLCN3		SETX
LDB1	ARID5B	CALM1	CLDN1		SFSWAP
LDLR	ARIH1	CALM2	CLDND1		SGTB
LEMD3	ARL13B	CALM3	CLEC16A		SH3BP2
LEO1	ARL14	CALU	CLIC4		SIN3A
LEPROT	ARL17A	CAMK2D	CLINT1		SKIL
LETM2	ARL4A	CAMK2N2	CLIP1		SLBP
LGALS1	ARL5A	CAMKK2	CLIP4		SLC20A2
LIF	ARL5B	CAMTA2	CLK1		SLC25A12
LIFR	ARL6	CAND1	CLK2		SLC2A1
LIG4	ARL6IP1	CANX	CLK4		SLC30A7
LIMA1	ARL6IP5	CAPN2	CLSTN1		SLC37A3
LIN54	ARL6IP6	CAPN7	CLSTN3		SLC4A7
LINC00659	ARL8A	CAPRIN1	CMIP		SLC7A11
LINC02693	ARL8B	CAPS	CMTM4		SLC7A6
LIPH	ARMC1	CAPS2	CNBP		SMAD7
LMBR1L	ARMC3	CAPZA1	CNNM1		SNIP1
LMBRD1	ARMC8	CAPZA2	CNOT1		SNX12
LMX1B	ARMCX1	CARS2	CNOT10		SNX25
LRCH1	ARMCX4	CASC4	CNOT7		SNX30
LRCH3	ARMCX6	CASD1	CNOT8		SNX4
LRP4	ARNT2	CASK	CNTN3		SNX9
LRP5	ARNTL	CASKIN1	CNTNAP1		SP100
LRP6	ARNTL2	CASP3	COBL		SPAG9
LRPAP1	ARPC1A	CASP8	COBLL1		SPC25
LRRC37A	ARPC4-TTLL3	CASP8AP2	COCH		SPECC1
LRRC37A2	ARPC5	CASQ2	COG3		SPIRE2
LSM1	ARPP19	CAV1	COG6		SPRY2
LSM8	ARPP21	CBFB	COIL		SPRY4
LYN	ARRDC1	CBL	COL14A1		SPSB1
MACF1	ARRDC4	CBR3	COL4A5		SRPRB
MAFF	ARSB	CBWD1	COLEC12		SRSF6
MAFG	ARSK	CBX3	COMMD5		STK24
MAP1LC3B	ART3	CBX4	COMMD8		STRN3
MAP1LC3B2	ARV1	CBX8	COPZ1		STXBP5
MAP2K1	ARX	CCAR1	COQ10B		SYNJ2
MAP2K3	ASAH1	CCDC106	COQ7		SYNRG
MAP3K2	ASAP1	CCDC112	CP		TACC1
MAP3K7	ASAP2	CCDC113	CPE		TAF13
MAP4K3	ASB11	CCDC117	CPEB3		TAF1B
MAPK6	ASB13	CCDC12	CPEB4		TAF4
MAPKAP1	ASB5	CCDC121	CPNE4		TAF4B
MAPKAPK2	ASB7	CCDC125	CPNE8		TANC1
MAPRE1	ASCC2	CCDC126	CPSF2		TAOK1
MARK2	ASCC3	CCDC14	CPSF6		TBC1D12
MARK4	ASCL1	CCDC25	CRB1		TBC1D14
MBD2	ASCL4	CCDC43	CRBN		TBX18
MBD6	ASF1A	CCDC47	CREB1		TDG
MBIP	ASF1B	CCDC50	CREB3L2		TEP1
MCAM	ASH1L	CCDC57	CREB5		TEX10
MED1	ASPH	CCDC6	CREBBP		TGFB1
MED13	ASPHD2	CCDC61	CREBL2		TGFBR1
MED17	ASPM	CCDC77	CREBZF		THBS1
MED28	ASPN	CCDC80	CRIM1		TIPARP
MED31	ASTN1	CCDC82	CRLS1		TJP1
MED4	ASTN2	CCDC91	CRY1		TLK1
MEF2A	ASXL1	CCNA2	CSNK1D		TM9SF2
MEGF9	ASXL2	CCNB2	CSNK1E		TMED7-TICAM2
METRNL	ASXL3	CCNC	CSNK1G3		TMEM128
MEX3C	ATAD1	CCND1	CSNK2A1		TMEM185B
MFAP2	ATAD2	CCND2	CSNK2A2		TMEM41B
MFSD14B	ATAD2B	CCNE2	CSPP1		TMTC3
MFSD9	ATAD5	CCNF	CSTF2		TNKS2
MICB	ATF1	CCNG1	CTCF		TOB2
MIER1	ATF2	CCNG2	CTDSP1		TOPBP1
MINDY3	ATF4	CCNH	CTGF		TPM4
MINK1	ATF6	CCNI	CTNND1		TPMT
MIR21	ATF7	CCNL1	CTTNBP2		TRAPPC10
MIR4435-2HG	ATF7IP	CCNT2	CUL1		TRAPPC4
MIR6516	ATG10	CCNY	CUL2		TRIO
MIR6751	ATG12	CCNYL1	CUL3		TSC22D2
MIR6820	ATG14	CCR5	CUL5		TSNAX
MISP	ATG16L1	CCR6	CUTC		TSPAN14
MKLN1	ATG2B	CCT3	CUX1		TTK
MKNK2	ATG3	CD2AP	CXADR		TUBGCP3
MLLT6	ATG7	CD46	CYLD		TXLNG
MND1	ATL1	CD47	CYP20A1		TXNL1
MOB1B	ATL2	CD55	CYP26A1		TYW3
MOCS2	ATL3	CD58	CYP2B6		UAP1
MON1A	ATM	CD69	CYP2U1		UBA2
MORC3	ATMIN	CD74	CYR61		UBE2A
MOSPD1	ATOH7	CD9	CYTH1		UBE2G1
MRPL22	ATOH8	CDC123	CYTH3		UBE2Z
MRPL39	ATP10D	CDC14A	DAB2		UBL3
MSL1	ATP11A	CDC14B	DACH1		UBR1
MSLN	ATP11B	CDC23	DAGLA		UBTD2
MSRB1	ATP11C	CDC25A	DBF4		UNC119
MSTO2P	ATP13A2	CDC27	DBR1		UNC50
MSX1	ATP13A3	CDC42EP3	DBT		USP24
MT1X	ATP1B1	CDC42SE2	DCBLD1		USP32
MTF2	ATP1B3	CDC7	DCC		USP33
MTM1	ATP1B4	CDCA4	DCK		USP47
MTMR12	ATP2A1	CDCA7	DCLRE1C		USP53
MTMR6	ATP2A2	CDCA8	DCP1A		UTP20
MYADM	ATP2B1	CDH18	DCP2		VCAN
MYBL1	ATP2B2	CDH2	DCT		VEZF1
MYEOV	ATP2B4	CDH23	DCUN1D1		VGF
MYL9	ATP2C1	CDH3	DCUN1D4		VPS13A
MYO1B	ATP5C1	CDH7	DDHD1		VPS13D
N6AMT1	ATP5G3	CDK2	DDHD2		VPS37A
NABP1	ATP5S	CDK2AP1	DDIT3		VPS54
NAGK	ATP6AP1	CDK6	DDX10		VTI1A
NAMPT	ATP6AP2	CDK7	DDX17		WAC
NAMPTP1	ATP6V0A2	CDKAL1	DDX18		WBP11
NBN	ATP6V1A	CDKN1A	DDX21		WDR26
NCEH1	ATP6V1B1	CDKN1B	DDX3X		WNT7B
NCKAP1	ATP6V1B2	CDKN2AIP	DDX50		WWC1
NCOA3	ATP6V1C1	CDON	DDX55		YOD1
NCOA6	ATP7A	CDR2	DDX59		ZBTB38
NCSTN	ATP7B	CDS2	DDX6		ZC3H15
NDEL1	ATP8A1	CEBPB	DEAF1		ZFAND5
NDFIP1	ATP8A2	CEBPD	DEK		ZFYVE21
NDFIP2	ATP8B1	CENPA	DENND4B		ZHX1
NDRG1	ATP8B4	CENPE	DENND4C		ZNF503
NECAP2	ATP9A	CENPJ	DEPDC1B		ZNF697
NEDD4	ATP9B	CENPN	DEPDC5		ZNF706
NEDD4L	ATPIF1	CENPO	DEPDC7		ZRANB2
NEO1	ATR	CEP120	DGAT1
NETO2	ATRN	CEP135	DGKD
NEU1	ATRNL1	CEP170	DGKE
NFE2L3	ATRX	CEP290	DHX32
NFKB2	ATXN1	CEP350	DHX33
NFKBIE	ATXN1L	CEP55	DHX35
NGFR	ATXN2	CEP57	DHX36
NHLRC2	ATXN3	CEP70	DIAPH1
NINL	ATXN7	CEP76	DIAPH3
NIPA1	ATXN7L1	CERK	DICER1
NOP16	ATXN7L3	CETN3	DIO3
NOTCH2NLA	ATXN7L3B	CFD	DIP2B
NOTCH2NLB	AURKA	CFDP1	DIP2C
NOTCH2NLC	AUTS2	CGGBP1	DIS3
NPAS2	AVPR1A	CGN	DISC1
NPC1	AXIN1	CHAC2	DKK1
NPEPPS	AXIN2	CHCHD3	DLAT
NPTN	AZGP1	CHCHD4	DLC1
NR1H2	AZI2	CHD1	DLD
NR4A1	AZIN1	CHD2	DLG1
NTN1	B3GALT1	CHD7	DLGAP4
NUDT4	B3GALT2	CHD8	DLGAP5
NUFIP2	B3GALT5	CHD9	DLL3
NUP98	B3GAT1	CHEK1	DLL4
ORMDL3	B3GNT5	CHEK2	DLX2
OSBP	B4GALT1	CHERP	DMXL1
OSBPL2	B4GALT2	CHIC1	DNAH11
OSBPL9	B4GALT4	CHIC2	DNAJA2
OSGIN1	B4GALT5	CHM	DNAJA3
OXR1	B4GALT6	CHMP1A	DNAJB1
P3H1	B9D2	CHMP2B	DNAJB14
PAIP1	BAALC	CHMP4C	DNAJB5
PANK3	BAAT	CHMP7	DNAJC19
PANX1	BACE1	CHN2	DNAJC2
PAQR5	BACH1	CHPF	DNAJC24
PARD6B	BACH2	CHRAC1	DNAJC5
PARP12	BAD	CHST9	DNMBP
PARP2	BAG1	CHSY1	DOCK1
PBDC1	BAG4	CHSY3	DOCK2
PCGF2	BAG5	CHUK	DOCK4
PCTP	BAGE	CISD1	DOCK9
PDCD10	BAHCC1	CISD2	DONSON
PDE6D	BAHD1	CISD3	DOPEY1
PDGFA	BAIAP2	CITED2	DPY19L1
PDGFB	BAIAP2L1	CKAP2L	DPY19L2P1
PDLIM3	BAP1	CKAP5	DPY19L2P2
PDLIM7	BARHL1	CKS2	DPY19L4
PEA15	BAZ1A	CLASP1	DSC2
PEX14	BAZ2B	CLASP2	DSC3
PGM2L1	BBC3	CLCC1	DSE
PGM3	BBOX1	CLCN3	DSG2
PHACTR2	BBS10	CLDN1	DST
PHETA1	BBS12	CLDND1	DTWD1
PIAS1	BBS2	CLEC16A	DTWD2
PIAS4	BBS7	CLIC2	DUSP1
PIGG	BBS9	CLIC4	DUSP11
PIKFYVE	BBX	CLINT1	DUSP16
PIP4K2C	BCAP29	CLIP1	DUSP18
PIP4P1	BCAR1	CLIP4	DUSP6
PLAGL2	BCAR3	CLK1	DUSP8
PLAT	BCAR4	CLK2	DYNC1I2
PLAUR	BCAS1	CLK4	DYNC1LI2
PLEKHA5	BCAS3	CLPTM1	DYNLT3
PLK3	BCAT1	CLSTN1	DYRK1A
PLOD2	BCCIP	CLSTN3	DYRK2
PNRC1	BCKDHB	CMIP	DZIP1
POLR2A	BCL10	CMTM3	E2F3
POLR2B	BCL11A	CMTM4	E2F5
POLR2J	BCL11B	CMTM6	E2F6
POLR2K	BCL2	CNBP	E2F8
POPDC3	BCL2L1	CNNM1	EAPP
PPARG	BCL2L11	CNOT1	EBAG9
PPIH	BCL2L13	CNOT10	EBF3
PPM1A	BCL2L15	CNOT4	EDA
PPM1B	BCL2L2-PABPN1	CNOT7	EDEM1
PPP1R13L	BCL3	CNOT8	EDEM3
PPP1R26	BCL6	CNTN3	EDIL3
PPP1R9B	BCL6B	CNTNAP1	EDNRA
PPP2CB	BCL9L	COBL	EEA1
PPP2R1B	BCLAF1	COBLL1	EED
PPP2R5B	BCOR	COCH	EEF2
PPP3R1	BCORL1	COG3	EFNA1
PPP4R2	BDH2	COG5	EFNA5
PPP6R3	BDNF	COG6	EFNB1
PPT2	BDP1	COIL	EFNB2
PPTC7	BEND2	COL14A1	EFR3A
PRAG1	BEND4	COL1A1	EGLN1
PRKCD	BEND6	COL4A1	EGR1
PRKCH	BEND7	COL4A5	EIF1AX
PRKD3	BEX4	COLEC12	EIF2AK3
PRR12	BFAR	COMMD5	EIF3F
PRRC1	BHLHB9	COMMD8	EIF3J
PRSS8	BHLHE22	COPB1	EIF4A3
PSD3	BHLHE40	COPE	EIF4E
PSEN2	BHLHE41	COPS2	EIF4ENIF1
PSMG2	BICD1	COPS5	EIF4G2
PTP4A2P2	BIVM	COPS8	EIF4G3
PTPRA	BLCAP	COPZ1	EIF5
PTPRJ	BLM	COQ10A	EIF5A2
PTPRK	BLOC1S2	COQ10B	ELAVL1
PTS	BLZF1	COQ6	ELF1
QKI	BMF	COQ7	ELF2
RAB11A	BMP2	CORO1C	ELF3
RAB14	BMP3	CP	ELK1
RAB18	BMP6	CPE	ELK4
RAB22A	BMP7	CPEB2	ELL2
RAB5B	BMP8A	CPEB3	ELMOD2
RAB5IF	BMP8B	CPEB4	ELP4
RABGGTB	BMPER	CPNE1	EML4
RABL3	BMPR1A	CPNE3	EMP1
RAD1	BMPR1B	CPNE4	EMP2
RAD21	BMPR2	CPNE8	EMX2
RALGAPB	BMS1	CPOX	EN1
RAP1B	BNC1	CPSF2	EN2
RAPGEF5	BNC2	CPSF6	ENAH
RASA2	BNIP2	CR1L	ENSA
RASAL2	BNIP3L	CRB1	ENTPD5
RBL1	BOC	CRBN	ENTPD7
RBM19	BOLL	CREB1	ENY2
RBM24	BPTF	CREB3L2	EPB41L4B
RBM27	BRCA2	CREB5	EPC1
RBM38	BRD1	CREBBP	EPC2
RBMS1	BRD2	CREBL2	EPHB4
RBP1	BRD3	CREBZF	EPHX2
RCL1	BRD4	CREM	EPS15
RELB	BRD7	CRIM1	ERBB4
RESF1	BRF1	CRLS1	ERC1
RGS14	BRF2	CRY1	ERCC3
RHEB	BRIP1	CSDE1	ERCC4
RHOF	BRIX1	CSGALNACT2	ERRFI1
RHOT1	BRMS1L	CSNK1A1	ESCO2
RHPN2	BRPF1	CSNK1D	ESD
RIC1	BRPF3	CSNK1E	ESF1
RIOK1	BRSK1	CSNK1G2	ETFDH
RMND5A	BRWD1	CSNK1G3	ETNK1
RNA5SP202	BRWD3	CSNK2A1	ETS2
RNF11	BSN	CSNK2A2	ETV3
RNF145	BST1	CSPP1	ETV4
RNF216	BTAF1	CSTF1	EVI5
RNF220	BTBD1	CSTF2	EWSR1
RNF38	BTBD11	CTBP2	EXO1
RNFT1	BTBD18	CTCF	EXOC5
RNU6-2	BTBD2	CTDSP1	EXOC6
RNU6-33P	BTBD3	CTGF	EXOC6B
RNU6-36P	BTBD7	CTH	EXOC8
RNU6-3P	BTBD9	CTNNA1	EXOSC10
RNU6-4P	BTC	CTNNAL1	EXOSC9
RNU6-5P	BTF3	CTNND1	EYA1
RNU6-6P	BTF3L4	CTTNBP2	EYA4
RNU6-7	BTG1	CUL1	EZR
RNU6-9	BTG4	CUL2	F2R
RPS6KA3	BTK	CUL3	F2RL1
RRAS	BTLA	CUL5	F3
RTEL1-TNFRSF6B	BTN2A2	CUTC	FAM103A1
S100A11	BTNL8	CUX1	FAM104A
SACM1L	BTRC	CXADR	FAM107B
SACS	BUB1	CXCR4	FAM120A
SASH1	BUB1B	CYB5R3	FAM122A
SASS6	BUB3	CYLD	FAM126A
SBDS	BZRAP1	CYP20A1	FAM126B
SBF1	BZW1	CYP26A1	FAM129A
SBF2	BZW2	CYP2A7	FAM133B
SBNO1	C10orf105	CYP2B6	FAM134A
SBNO2	C10orf113	CYP2U1	FAM135A
SCAMP2	C10orf128	CYP3A4	FAM149A
SCML1	C10orf131	CYR61	FAM168B
SCYL1	C10orf2	CYTH1	FAM172A
SCYL2	C10orf53	CYTH3	FAM177A1
SDC4	C10orf55	DAB1	FAM179A
SDCBP	C10orf88	DAB2	FAM19A5
SDE2	C11orf57	DACH1	FAM3C
SDF2	C11orf84	DAG1	FAM46A
SEC23A	C11orf87	DAGLA	FAM53C
SEC24A	C11orf88	DARS	FAM60A
SEC24B	C11orf95	DAXX	FAM63B
SEC24D	C12orf29	DBF4	FAM64A
SECISBP2L	C12orf4	DBR1	FAM72B
SELENOI	C12orf50	DBT	FAM76B
SELENOS	C12orf66	DCBLD1	FAM84A
SEPTIN6	C14orf105	DCC	FAM86B1
SEPTIN7P3	C14orf119	DCK	FAM96A
SERPINE1	C14orf132	DCLRE1C	FAR1
SERTAD1	C14orf2	DCP1A	FAS
SESN2	C14orf37	DCP2	FASTKD1
SETX	C14orf39	DCT	FAT1
SFSWAP	C14orf79	DCTN4	FAT3
SGPL1	C15orf40	DCTN6	FAT4
SGTB	C15orf48	DCUN1D1	FBN1
SH2B3	C15orf54	DCUN1D4	FBN2
SH3BP2	C15orf57	DDHD1	FBRS
SH3TC1	C15orf61	DDHD2	FBXL14
SHROOM1	C16orf45	DDIT3	FBXL16
SIN3A	C16orf52	DDX10	FBXL17
SKIL	C16orf70	DDX17	FBXO11
SLBP	C16orf87	DDX18	FBXO21
SLC20A2	C17orf51	DDX21	FBXO25
SLC25A12	C17orf58	DDX24	FBXO3
SLC26A11	C17orf67	DDX31	FBXO30
SLC2A1	C17orf75	DDX3X	FBXO32
SLC30A7	C17orf77	DDX50	FBXO33
SLC36A1	C17orf78	DDX55	FBXO34
SLC37A3	C18orf21	DDX59	FBXO36
SLC3A2	C18orf25	DDX6	FBXO38
SLC43A2	C18orf54	DEAF1	FBXO45
SLC4A7	C19orf12	DEK	FBXO5
SLC6A10P	C19orf43	DENND1C	FBXO8
SLC7A11	C19orf45	DENND4B	FBXW11
SLC7A6	C1D	DENND4C	FBXW2
SLC9A1	C1orf101	DENND5A	FCHO2
SMAD7	C1orf109	DEPDC1B	FEM1C
SMIM29	C1orf112	DEPDC5	FERMT2
SNAI1	C1orf115	DEPDC7	FEZF1
SNIP1	C1orf116	DFNA5	FGB
SNORD3B-1	C1orf198	DGAT1	FGD4
SNX12	C1orf21	DGKD	FGF13
SNX25	C1orf216	DGKE	FGF2
SNX3	C1orf226	DHRSX	FGF5
SNX30	C1orf52	DHX15	FGF9
SNX4	C1orf74	DHX32	FGFR1
SNX9	C1orf95	DHX33	FGFR1OP2
SP100	C1QTNF6	DHX35	FGFR2
SPAG9	C1QTNF7	DHX36	FGR
SPC25	C1RL	DIAPH1	FHDC1
SPECC1	C1S	DIAPH3	FHL1
SPINDOC	C20orf197	DICER1	FIGN
SPINT1	C21orf59	DIO3	FJX1
SPIRE2	C21orf91	DIP2B	FKBP5
SPPL2A	C2CD4C	DIP2C	FLNB
SPRY2	C2orf42	DIS3	FLT1
SPRY4	C2orf47	DIS3L2	FLT3LG
SPSB1	C2orf49	DISC1	FLVCR1
SRPRB	C2orf54	DKK1	FMN2
SRSF6	C2orf69	DLAT	FMO1
ST14	C2orf70	DLC1	FMR1
STK24	C2orf78	DLD	FN1
STK38	C2orf83	DLG1	FNBP1
STRN3	C3orf33	DLGAP4	FNBP1L
STXBP5	C3orf35	DLGAP5	FNBP4
SUCO	C3orf52	DLL3	FNDC3A
SYNJ2	C3orf58	DLL4	FNDC3B
SYNRG	C3orf67	DLX2	FNIP1
TACC1	C3orf70	DMXL1	FOXA1
TAF13	C4orf33	DNAH11	FOXF1
TAF1B	C4orf46	DNAJA2	FOXF2
TAF4	C5orf15	DNAJA3	FOXK2
TAF4B	C5orf22	DNAJB1	FOXM1
TANC1	C5orf24	DNAJB14	FOXN2
TAOK1	C5orf28	DNAJB5	FOXN3
TAP1	C5orf30	DNAJC18	FOXO1
TASOR2	C5orf34	DNAJC19	FOXO3
TBC1D12	C5orf42	DNAJC2	FOXP1
TBC1D13	C5orf56	DNAJC24	FOXP2
TBC1D14	C6orf1	DNAJC5	FPGT
TBPL1	C6orf106	DNMBP	FRMD4B
TBX18	C6orf120	DNMT1	FRMD6
TDG	C6orf132	DNMT3A	FRMPD4
TEP1	C6orf136	DNPEP	FRS2
TEX10	C6orf222	DOCK1	FSD1L
TGFB1	C6orf58	DOCK2	FST
TGFBR1	C6orf62	DOCK4	FSTL1
THBS1	C6orf89	DOCK9	FUNDC1
THSD1	C7orf31	DOK2	FYN
TIMP1	C7orf33	DONSON	FYTTD1
TIMP2	C7orf57	DOPEY1	FZD3
TINAGL1	C7orf60	DPH3	FZD5
TIPARP	C7orf65	DPY19L1	FZD6
TJP1	C8orf34	DPY19L2P1	FZD7
TLK1	C8orf46	DPY19L2P2	FZD8
TM9SF2	C8orf86	DPY19L4	GAB1
TMED7-TICAM2	C9orf114	DSC2	GABARAPL2
TMEM128	C9orf152	DSC3	GABRB2
TMEM167B	C9orf170	DSE	GAD1
TMEM185B	C9orf47	DSG2	GALNT1
TMEM248	C9orf66	DST	GAN
TMEM41B	C9orf78	DTWD1	GAS1
TMEM50A	C9orf84	DTWD2	GAS2L1
TMEM92	C9orf85	DUOX1	GAS6
TMEM98	C9orf91	DUSP1	GATA2
TMSB10	CA1	DUSP11	GATA3
TMTC3	CA10	DUSP16	GATA6
TNFAIP1	CA13	DUSP18	GATAD1
TNFRSF10A	CA14	DUSP6	GBX2
TNFRSF10B	CA5B	DUSP8	GCA
TNFRSF10D	CA8	DYNC1I2	GCLC
TNFRSF12A	CAB39	DYNC1LI1	GCLM
TNFSF9	CAB39L	DYNC1LI2	GFPT1
TNKS2	CABP1	DYNLT3	GIGYF1
TNS4	CABP4	DYRK1A	GIGYF2
TOB2	CABP7	DYRK2	GINS1
TOMM40L	CABYR	DYRK4	GIT1
TOMM70	CACNA1B	DZIP1	GIT2
TOPBP1	CACNA1C	E2F3	GK5
TOR1A	CACNA1E	E2F5	GKAP1
TPM4	CACNA1G	E2F6	GLCCI1
TPMT	CACNA2D1	E2F7	GLCE
TRABD2A	CACNA2D3	E2F8	GLI2
TRAPPC10	CACNA2D4	EAPP	GLI3
TRAPPC4	CACNB2	EBAG9	GLS
TRIM8	CACNB4	EBF3	GM2A
TRIML2	CACNG1	ECHDC2	GMCL1
TRIO	CACNG2	ECHS1	GNA13
TSC22D2	CACNG6	EDA	GNAI1
TSNAX	CACNG7	EDEM1	GNAL
TSPAN14	CACNG8	EDEM3	GNB5
TSTA3	CADM1	EDIL3	GNE
TTK	CADM2	EDNRA	GNG10
TUBB2A	CADPS	EEA1	GNPDA2
TUBB6	CADPS2	EED	GNPNAT1
TUBGCP3	CAGE1	EEF1A2	GNPTAB
TVP23B	CALB1	EEF2	GOLGA1
TVP23C	CALCA	EFCAB9	GOLM1
TXLNG	CALCB	EFNA1	GOLPH3
TXNL1	CALCOCO2	EFNA5	GOLT1B
TYW3	CALCR	EFNB1	GOPC
UAP1	CALCRL	EFNB2	GORASP2
UBA2	CALD1	EFR3A	GPATCH2
UBASH3B	CALM1	EGFR	GPATCH8
UBE2A	CALM2	EGLN1	GPM6B
UBE2B	CALM3	EGR1	GPN3
UBE2G1	CALML4	EHMT1	GPR1
UBE2Z	CALN1	EI24	GPR161
UBL3	CALU	EIF1AX	GPRC5A
UBR1	CAMK1D	EIF2A	GPRIN3
UBTD2	CAMK2A	EIF2AK3	GRAMD1B
UNC119	CAMK2D	EIF2B5	GRAMD1C
UNC50	CAMK2N1	EIF2S2	GRAMD4
UPP1	CAMK4	EIF2S3	GRB10
USP24	CAMKK2	EIF3D	GRB2
USP32	CAMKV	EIF3F	GRHL1
USP33	CAMSAP1	EIF3J	GRIA3
USP47	CAMTA1	EIF4A3	GRID1
USP53	CAMTA2	EIF4E	GRIK2
UTP20	CAND1	EIF4ENIF1	GRTP1
VASP	CANX	EIF4G2	GSK3A
VCAN	CAP1	EIF4G3	GSK3B
VCL	CAP2	EIF5	GSPT1
VEZF1	CAPN10	EIF5A2	GSTCD
VGF	CAPN2	ELAVL1	GSTM3
VPS13A	CAPN7	ELAVL4	GTF2A1
VPS13D	CAPRIN1	ELF1	GTF2B
VPS37A	CAPRIN2	ELF2	GTF3C3
VPS54	CAPS2	ELF3	GTPBP10
VSIR	CAPZA2	ELF4	GTPBP2
VTI1A	CARD14	ELF5	GTSE1
WAC	CARD8	ELK1	GUCY1A3
WBP11	CASC1	ELK4	GUCY1B3
WDR20	CASC4	ELL2	H1F0
WDR26	CASC5	ELMOD2	HBP1
WDR45	CASD1	ELP4	HCCS
WNT7B	CASK	EML2	HCFC1
WRAP73	CASKIN2	EML4	HCG11
WTIP	CASP10	EMP1	HDAC4
WWC1	CASP3	EMP2	HDAC9
YOD1	CASP4	EMX2	HEATR3
YPEL5	CASP9	EN1	HEATR5A
YRDC	CASQ2	EN2	HEATR5B
ZBTB38	CASR	ENAH	HEBP2
ZBTB4	CAST	ENDOD1	HECA
ZC3H15	CASZ1	ENSA	HECTD1
ZFAND3	CAV1	ENTPD5	HECTD2
ZFAND5	CAV2	ENTPD7	HELZ
ZFYVE21	CBFA2T2	ENY2	HERC3
ZHX1	CBFA2T3	EP300	HERC4
ZNF503	CBFB	EPB41L3	HERPUD1
ZNF655	CBL	EPB41L4B	HESX1
ZNF697	CBR4	EPC1	HHEX
ZNF706	CBWD1	EPC2	HIF1A
ZRANB2	CBWD2	EPHB4	HIPK2
ZYX	CBWD3	EPHX2	HK2
	CBWD6	EPOR	HLX
	CBX3	EPRS	HMGA2
	CBX4	EPS15	HMGB1
	CBX5	ERBB4	HMGB2
	CBX8	ERC1	HMGB3
	CC2D1B	ERCC2	HMGCR
	CC2D2B	ERCC3	HMX2
	CCAR1	ERCC4	HNMT
	CCBL2	ERH	HNRNPA0
	CCDC102B	ERLIN1	HNRNPA1
	CCDC107	ERN1	HNRNPA2B1
	CCDC109B	ERRFI1	HNRNPA3P1
	CCDC110	ESCO2	HNRNPC
	CCDC117	ESD	HNRNPH3
	CCDC12	ESF1	HNRNPR
	CCDC120	ETAA1	HNRNPU
	CCDC125	ETFDH	HNRNPUL2
	CCDC126	ETNK1	HOMER1
	CCDC14	ETS2	HOXA10
	CCDC141	ETV3	HOXA11
	CCDC144A	ETV4	HOXA13
	CCDC144NL	EVI5	HOXA9
	CCDC149	EWSR1	HOXC11
	CCDC15	EXO1	HOXC13
	CCDC150	EXOC1	HOXC9
	CCDC158	EXOC2	HP1BP3
	CCDC163P	EXOC5	HS6ST2
	CCDC25	EXOC6	HSD17B12
	CCDC30	EXOC6B	HSD17B4
	CCDC36	EXOC8	HSF2
	CCDC43	EXOSC10	HSPA12A
	CCDC50	EXOSC9	HSPA13
	CCDC54	EYA1	HSPA14
	CCDC6	EYA4	HSPBAP1
	CCDC61	EZR	HSPD1
	CCDC62	F11R	HSPH1
	CCDC64	F13A1	HTR2A
	CCDC66	F2R	HTT
	CCDC68	F2RL1	IARS2
	CCDC73	F3	ICA1
	CCDC77	FAM101B	ICK
	CCDC82	FAM103A1	ID2
	CCDC85A	FAM104A	IDH3A
	CCDC85C	FAM107B	IDI1
	CCDC86	FAM117B	IER3IP1
	CCDC88A	FAM120A	IER5
	CCDC89	FAM122A	IFFO2
	CCDC97	FAM126A	IFI16
	CCIN	FAM126B	IFIT1
	CCL8	FAM127B	IFIT5
	CCNA2	FAM129A	IFNAR1
	CCNB1	FAM133B	IFNGR1
	CCNB2	FAM134A	IFNGR2
	CCND2	FAM135A	IFRD1
	CCNDBP1	FAM149A	IFT80
	CCNE2	FAM155A	IGF2BP2
	CCNG2	FAM168B	IGF2R
	CCNH	FAM172A	IKZF4
	CCNK	FAM175B	IL15
	CCNL1	FAM177A1	IL1R1
	CCNL2	FAM179A	IL1RAP
	CCNO	FAM19A5	ILKAP
	CCNT2	FAM21C	IMMP1L
	CCNY	FAM3C	IMPA1
	CCPG1	FAM46A	IMPAD1
	CCR1	FAM53C	ING3
	CCR5	FAM60A	INO80D
	CCR6	FAM63B	INPP4B
	CCRL2	FAM64A	INSIG1
	CCT6B	FAM65A	INSIG2
	CCT7	FAM72B	INSM1
	CCZ1	FAM76B	INSR
	CD109	FAM78B	INTS10
	CD163	FAM84A	INTS2
	CD164	FAM86B1	INTS6
	CD1D	FAM96A	INTS7
	CD200R1	FAM98A	IPMK
	CD209	FAM98B	IPO7
	CD226	FAR1	IQUB
	CD24	FARP1	IRAK1BP1
	CD247	FAS	IREB2
	CD28	FASTKD1	IRF1
	CD2AP	FASTKD3	IRF2
	CD300LG	FASTKD5	IRF2BP1
	CD302	FAT1	IRF2BP2
	CD34	FAT3	IRF6
	CD36	FAT4	IRS1
	CD37	FBN1	IRS2
	CD40	FBN2	IRX3
	CD44	FBRS	IRX5
	CD46	FBXL14	ISCU
	CD47	FBXL16	ITCH
	CD58	FBXL17	ITFG1
	CD59	FBXL3	ITGA2
	CD81	FBXO10	ITGA4
	CD82	FBXO11	ITGA6
	CD86	FBXO18	ITGB3BP
	CD8A	FBXO21	ITM2C
	CD9	FBXO25	ITPR1
	CD93	FBXO3	ITSN2
	CDC123	FBXO30	IVNS1ABP
	CDC14A	FBXO32	JAG1
	CDC14B	FBXO33	JAG2
	CDC14C	FBXO34	JAK2
	CDC16	FBXO36	JAZF1
	CDC27	FBXO38	JMJD1C
	CDC37L1	FBXO45	JRKL
	CDC40	FBXO5	JUN
	CDC42	FBXO8	KALRN
	CDC42BPA	FBXW11	KATNAL1
	CDC42BPB	FBXW2	KBTBD2
	CDC42EP3	FCER1A	KBTBD8
	CDC42SE2	FCHO2	KCMF1
	CDC5L	FDX1	KCNAB2
	CDC6	FEM1B	KCNG3
	CDC7	FEM1C	KCNJ4
	CDC73	FERMT2	KCNK1
	CDCA2	FEZF1	KCNQ5
	CDCA5	FGB	KCNT2
	CDCA7	FGD4	KCTD12
	CDCA8	FGF13	KCTD3
	CDH1	FGF2	KDELC2
	CDH10	FGF5	KEAP1
	CDH11	FGF9	KIAA0391
	CDH13	FGFR1	KIAA0907
	CDH17	FGFR1OP2	KIAA1109
	CDH18	FGFR2	KIAA1143
	CDH2	FGR	KIAA1147
	CDH22	FH	KIAA1217
	CDH26	FHDC1	KIAA1429
	CDH4	FHL1	KIAA1468
	CDH5	FHOD3	KIAA1586
	CDH6	FIGN	KIAA1715
	CDH7	FILIP1L	KIAA1804
	CDH8	FJX1	KIAA2026
	CDH9	FKBP3	KIF11
	CDK1	FKBP4	KIF16B
	CDK11A	FKBP5	KIF18A
	CDK12	FKBP7	KIF1B
	CDK13	FLNA	KIF20B
	CDK14	FLNB	KIF21A
	CDK17	FLT1	KIF3A
	CDK19	FLT3LG	KIT
	CDK5R1	FLVCR1	KITLG
	CDK5RAP1	FMN2	KLC1
	CDK5RAP2	FMO1	KLF10
	CDK6	FMO4	KLF12
	CDK7	FMR1	KLF13
	CDK8	FN1	KLF15
	CDKL1	FNBP1	KLF3
	CDKL2	FNBP1L	KLF4
	CDKN1A	FNBP4	KLF5
	CDKN1B	FNDC3A	KLF9
	CDKN1C	FNDC3B	KLHDC10
	CDKN2AIP	FNIP1	KLHL13
	CDKN2B	FOSL2	KLHL20
	CDKN3	FOXA1	KLHL23
	CDO1	FOXF1	KLHL28
	CDON	FOXF2	KLHL29
	CDR2	FOXK2	KLHL8
	CDS1	FOXM1	KPNA1
	CDS2	FOXN2	KPNA2
	CDX1	FOXN3	KPNA4
	CDYL2	FOXO1	KRIT1
	CEACAM7	FOXO3	KRR1
	CEBPB	FOXP1	KSR2
	CEBPD	FOXP2	L1CAM
	CEBPZ	FOXP4	L2HGDH
	CECR2	FOXRED1	L3MBTL3
	CELF1	FPGT	L3MBTL4
	CELF2	FRMD4B	LACTB2
	CELF3	FRMD6	LAMP2
	CELF4	FRMPD2	LANCL1
	CELF5	FRMPD4	LARP4
	CELF6	FRS2	LBR
	CELSR1	FSD1L	LCOR
	CELSR2	FST	LDOC1L
	CELSR3	FSTL1	LEMD3
	CENPA	FTH1	LENG8
	CENPBD1	FUNDC1	LEPROTL1
	CENPE	FUT11	LGR4
	CENPF	FXR2	LGR5
	CENPJ	FYN	LHX2
	CENPK	FYTTD1	LIFR
	CENPN	FZD3	LIG4
	CEP120	FZD5	LIMCH1
	CEP135	FZD6	LIN54
	CEP170	FZD7	LIN7C
	CEP192	FZD8	LIN9
	CEP290	GAB1	LIX1L
	CEP350	GABARAPL2	LMBR1
	CEP63	GABPA	LMBRD1
	CEP68	GABPB2	LMNB2
	CEP70	GABRB2	LMX1B
	CEP76	GAD1	LONP2
	CEP78	GADD45A	LONRF1
	CEPT1	GALNT1	LONRF2
	CERK	GAN	LONRF3
	CERKL	GARNL3	LPGAT1
	CES3	GART	LPP
	CFHR5	GAS1	LRIG2
	CFLAR	GAS2L1	LRP12
	CGGBP1	GAS2L3	LRP2
	CGNL1	GAS6	LRP5
	CH25H	GATA2	LRP8
	CHCHD1	GATA3	LRPPRC
	CHCHD7	GATA6	LRRC57
	CHD1	GATAD1	LRRC58
	CHD2	GBGT1	LRRFIP2
	CHD3	GBX2	LRRTM4
	CHD6	GCA	LSM1
	CHD7	GCLC	LSM14A
	CHD9	GCLM	LSM14B
	CHEK1	GCSH	LSM5
	CHEK2	GDE1	LTV1
	CHFR	GDI1	LUC7L
	CHIC1	GEN1	LUC7L2
	CHL1	GFM1	LYN
	CHM	GFPT1	LYPD6
	CHMP1A	GIGYF1	LYPLAL1
	CHMP1B	GIGYF2	LYRM7
	CHMP2B	GINS1	LYSMD3
	CHMP4C	GINS3	LZTFL1
	CHMP7	GIT1	LZTS2
	CHN2	GIT2	MADD
	CHODL	GK5	MAFG
	CHORDC1	GKAP1	MAK16
	CHP2	GLCCI1	MAL2
	CHPT1	GLCE	MALT1
	CHRAC1	GLI2	MAML1
	CHRD	GLI3	MAML2
	CHRM5	GLO1	MAML3
	CHRNB4	GLRX5	MAN1A1
	CHST1	GLS	MANBA
	CHST11	GLUL	MANEA
	CHST15	GM2A	MAP1B
	CHST3	GMCL1	MAP1LC3B
	CHST9	GMFB	MAP3K1
	CHSY1	GNA13	MAP3K4
	CHSY3	GNAI1	MAP4K3
	CHUK	GNAL	MAP7D3
	CHURC1	GNAQ	MAP9
	CIC	GNAS	MAPK6
	CILP	GNB5	MAPKAP1
	CISD1	GNE	MAPKAPK5
	CISD2	GNG10	MAPRE2
	CISD3	GNPDA2	MARCKS
	CIT	GNPNAT1	MARK4
	CITED1	GNPTAB	MASTL
	CKAP2	GOLGA1	MAT2B
	CKAP2L	GOLGA5	MAX
	CKAP5	GOLIM4	MBD5
	CKS2	GOLM1	MBIP
	CLASP1	GOLPH3	MBNL1
	CLASP2	GOLPH3L	MBNL2
	CLCA4	GOLT1B	MBNL3
	CLCN2	GOPC	MBTD1
	CLCN3	GORASP2	MCEE
	CLCN5	GPATCH2	MCM3
	CLCN6	GPATCH8	MCM4
	CLDN1	GPD2	MCM8
	CLDN10	GPHN	MCPH1
	CLDN11	GPM6B	MCRS1
	CLDN12	GPN3	MDGA2
	CLDN23	GPR1	MDM1
	CLDND1	GPR137	MDM2
	CLEC16A	GPR143	ME2
	CLEC1A	GPR161	MECP2
	CLEC2D	GPR89A	MED13
	CLEC3A	GPRC5A	MED13L
	CLEC4A	GPRIN3	MED14
	CLEC4D	GRAMD1B	MED17
	CLIC4	GRAMD1C	MED23
	CLINT1	GRAMD4	MED28
	CLIP1	GRB10	MED4
	CLIP4	GRB2	MEF2D
	CLK1	GRHL1	MEGF10
	CLK2	GRIA3	MEGF9
	CLK4	GRID1	MELK
	CLMN	GRIK2	MET
	CLN5	GRIK4	METTL10
	CLN8	GRTP1	METTL7A
	CLOCK	GSK3A	METTL8
	CLPTM1L	GSK3B	MFAP1
	CLPX	GSPT1	MFAP3
	CLSTN1	GSTCD	MFF
	CLSTN3	GSTK1	MFGE8
	CLTC	GSTM3	MFN1
	CLU	GTF2A1	MFSD8
	CLUL1	GTF2A1L	MGAT2
	CLVS1	GTF2B	MGAT3
	CLYBL	GTF2E1	MGAT4A
	CMIP	GTF3C3	MGEA5
	CMKLR1	GTF3C4	MIB1
	CMPK2	GTPBP1	MIER1
	CMTM4	GTPBP10	MIER3
	CMTM8	GTPBP2	MINA
	CNBP	GTSE1	MINPP1
	CNDP1	GUCY1A3	MIPOL1
	CNDP2	GUCY1B3	MITF
	CNGA1	GYG2	MKI67
	CNGA2	H1F0	MKL1
	CNGA3	H2AFV	MKL2
	CNIH3	H2AFY2	MKLN1
	CNIH4	H3F3B	MKNK2
	CNKSR2	HAGH	MLLT10
	CNKSR3	HAND1	MLLT4
	CNNM1	HAVCR2	MMAA
	CNNM4	HBEGF	MMGT1
	CNOT1	HBP1	MMP14
	CNOT10	HCCS	MMP15
	CNOT2	HCFC1	MN1
	CNOT6	HCG11	MND1
	CNOT6L	HDAC3	MNT
	CNOT7	HDAC4	MNX1
	CNOT8	HDAC9	MORC3
	CNPY3	HEATR3	MORF4L2
	CNR1	HEATR5A	MOSPD2
	CNRIP1	HEATR5B	MPHOSPH10
	CNTF	HEBP2	MPHOSPH6
	CNTFR	HECA	MPHOSPH8
	CNTLN	HECTD1	MPHOSPH9
	CNTN1	HECTD2	MPP5
	CNTN2	HELB	MPP6
	CNTN3	HELZ	MPP7
	CNTN4	HERC3	MPZL2
	CNTN5	HERC4	MREG
	CNTN6	HERPUD1	MRPL16
	CNTNAP1	HESX1	MRPL18
	CNTNAP2	HHEX	MRPL19
	CNTNAP3	HIBADH	MRPL22
	COBL	HIF1A	MRPL3
	COBLL1	HIPK2	MRPL30
	COCH	HIST1H2AC	MRPL34
	COG3	HK2	MRPL35
	COG6	HLA-DRB1	MRPL49
	COG7	HLX	MRPL50
	COIL	HMBS	MRPS18B
	COL12A1	HMGA2	MRPS22
	COL13A1	HMGB1	MRPS23
	COL14A1	HMGB2	MRPS26
	COL15A1	HMGB3	MRPS27
	COL17A1	HMGCR	MRPS35
	COL19A1	HMMR	MRPS36
	COL21A1	HMOX1	MSC
	COL24A1	HMX2	MSH2
	COL25A1	HNMT	MSI1
	COL28A1	HNRNPA0	MSI2
	COL3A1	HNRNPA1	MSX1
	COL4A3BP	HNRNPA2B1	MTA3
	COL4A4	HNRNPA3P1	MTAP
	COL4A5	HNRNPAB	MTDH
	COL4A6	HNRNPC	MTF1
	COL5A2	HNRNPF	MTF2
	COL5A3	HNRNPH3	MTM1
	COL6A3	HNRNPK	MTMR1
	COL6A4P1	HNRNPL	MTMR12
	COL6A5	HNRNPR	MTMR3
	COL8A1	HNRNPU	MTMR6
	COL9A2	HNRNPUL2	MTRF1
	COL9A3	HOMER1	MTUS1
	COLEC11	HORMAD1	MTX3
	COLEC12	HOXA10	MUC16
	COMMD10	HOXA11	MXD1
	COMMD2	HOXA13	MXI1
	COMMD3	HOXA5	MYB
	COMMD5	HOXA9	MYC
	COMMD6	HOXC11	MYCBP2
	COMMD7	HOXC13	MYO1E
	COMMD8	HOXC4	MYO5A
	COPS4	HOXC9	MYO5B
	COPZ1	HOXD13	MYO9A
	COQ10B	HP1BP3	MYSM1
	COQ7	HRC	MYT1
	COQ9	HRK	N4BP2L2
	CORIN	HS6ST2	NAALADL2
	CORO2A	HSD17B12	NAB1
	COX18	HSD17B4	NANP
	COX4I1	HSF2	NAP1L1
	COX6B2	HSF2BP	NAPB
	CP	HSPA12A	NASP
	CPD	HSPA13	NAT8L
	CPE	HSPA14	NBEA
	CPEB1	HSPA1B	NCAM1
	CPEB3	HSPBAP1	NCAPH
	CPEB4	HSPD1	NCBP2
	CPLX3	HSPH1	NCK1
	CPM	HTR2A	NCKAP1
	CPNE4	HTT	NCOA1
	CPNE8	HUNK	NCOA3
	CPPED1	IARS2	NCOA6
	CPSF2	ICA1	NCOA7
	CPSF4	ICK	NDC80
	CPSF6	ICMT	NDEL1
	CPT1A	ID2	NDFIP1
	CPZ	IDH3A	NDUFA12
	CR1	IDI1	NDUFS3
	CR2	IER3IP1	NDUFV2
	CRB1	IER5	NEK1
	CRBN	IFFO2	NEK2
	CREB1	IFI16	NEK3
	CREB3L1	IFI27	NEK7
	CREB3L2	IFIT1	NET1
	CREB5	IFIT5	NEXN
	CREBBP	IFNAR1	NF1
	CREBL2	IFNGR1	NFAT5
	CREBZF	IFNGR2	NFE2L2
	CREG2	IFRD1	NFIA
	CRELD2	IFT52	NFIL3
	CRHR2	IFT80	NFKBIA
	CRIM1	IGBP1	NFKBIZ
	CRISP2	IGF2BP2	NFS1
	CRISPLD1	IGF2R	NFYA
	CRISPLD2	IKBKG	NFYB
	CRKL	IKZF4	NGDN
	CRLF3	IL10RB	NHEJ1
	CRLS1	IL15	NHLRC2
	CRNKL1	IL16	NHS
	CROT	IL1R1	NIF3L1
	CRTAP	IL1RAP	NIN
	CRTC1	ILKAP	NINJ1
	CRTC3	IMMP1L	NIPA1
	CRX	IMMP2L	NIPA2
	CRY1	IMMT	NKRF
	CSAD	IMPA1	NKTR
	CSE1L	IMPAD1	NLGN1
	CSF2RB	ING3	NLGN2
	CSMD1	ING5	NLGN4X
	CSMD2	INO80D	NLK
	CSMD3	INPP4B	NOL8
	CSNK1D	INPP5E	NOLC1
	CSNK1E	INSIG1	NOTCH2
	CSNK1G3	INSIG2	NOV
	CSNK2A1	INSM1	NOVA1
	CSNK2A2	INSR	NPAT
	CSPG5	INTS10	NPC1
	CSPP1	INTS12	NPEPPS
	CSRNP3	INTS2	NPM3
	CSTF2	INTS5	NPNT
	CSTF3	INTS6	NPTX1
	CTAGE10P	INTS7	NR1D1
	CTAGE11P	INTS8	NR2C2
	CTAGE5	IPMK	NR2F2
	CTAGE9	IPO7	NR3C1
	CTBS	IQCE	NR4A1
	CTCF	IQGAP2	NR5A2
	CTDNEP1	IQSEC1	NRCAM
	CTDP1	IQUB	NRF1
	CTDSP1	IRAK1BP1	NRIP1
	CTDSPL	IREB2	NRP1
	CTDSPL2	IRF1	NRXN2
	CTF1	IRF2	NRXN3
	CTGF	IRF2BP1	NSL1
	CTHRC1	IRF2BP2	NT5DC3
	CTNNA3	IRF6	NTN4
	CTNNB1	IRS1	NUCKS1
	CTNNBIP1	IRS2	NUDCD1
	CTNND1	IRS4	NUDT10
	CTNND2	IRX3	NUDT12
	CTNS	IRX5	NUDT21
	CTPS2	ISCA1	NUDT3
	CTR9	ISCU	NUDT4
	CTSC	ITCH	NUF2
	CTSO	ITFG1	NUFIP2
	CTSZ	ITGA2	NUMB
	CTTNBP2	ITGA4	NUP153
	CTTNBP2NL	ITGA6	NUP160
	CTXN2	ITGB1	NUP54
	CTXN3	ITGB3BP	NUP93
	CUBN	ITM2C	NUP98
	CUL1	ITPR1	NUPL2
	CUL2	ITPRIPL2	NUS1
	CUL3	ITSN2	NUSAP1
	CUL4A	IVNS1ABP	NXF1
	CUL4B	IWS1	OAT
	CUL5	JAG1	OBFC1
	CUTC	JAG2	OCIAD1
	CUX1	JAK1	OGFRL1
	CWC22	JAK2	OIP5
	CWC27	JAZF1	ONECUT2
	CXADR	JMJD1C	OPA1
	CXCL10	JRKL	ORMDL1
	CXCL12	JUN	OSBPL10
	CXCL14	KALRN	OSBPL11
	CXCL5	KATNAL1	OSBPL6
	CXCR2	KBTBD2	OSBPL8
	CXCR2P1	KBTBD7	OSBPL9
	CXCR6	KBTBD8	OSGEPL1
	CXorf23	KCMF1	OSR2
	CXorf36	KCNAB2	OTUD1
	CXorf38	KCNG3	OTUD4
	CXorf56	KCNJ4	OTX1
	CXXC4	KCNK1	OXA1L
	CYB5B	KCNQ5	OXR1
	CYB5D2	KCNT2	PACRGL
	CYB5R4	KCTD12	PAFAH1B1
	CYCS	KCTD3	PAFAH1B2
	CYFIP1	KDELC2	PAG1
	CYLD	KEAP1	PAIP1
	CYP19A1	KHSRP	PAK1IP1
	CYP20A1	KIAA0319L	PAK2
	CYP24A1	KIAA0391	PALB2
	CYP26A1	KIAA0907	PALM2-AKAP2
	CYP26B1	KIAA1109	PAM
	CYP2B6	KIAA1143	PANK1
	CYP2R1	KIAA1147	PANK2
	CYP2U1	KIAA1217	PANK3
	CYP3A5	KIAA1429	PAPD4
	CYP4A11	KIAA1468	PAPD5
	CYP4A22	KIAA1586	PAPOLA
	CYP4F11	KIAA1715	PAPOLG
	CYP4F3	KIAA1804	PAQR3
	CYP51A1	KIAA2026	PARD3
	CYR61	KIF11	PARD3B
	CYSLTR1	KIF16B	PARD6B
	CYTH1	KIF18A	PARG
	CYTH3	KIF1B	PARP14
	CYTIP	KIF20B	PARP2
	CYYR1	KIF21A	PARP6
	DAAM1	KIF3A	PASK
	DAB2	KIF5A	PATL1
	DAB2IP	KIF5B	PAX9
	DACH1	KIF5C	PBX3
	DACH2	KIFC1	PCBP2
	DACT1	KIRREL3	PCDH11Y
	DACT3	KIT	PCDH7
	DAD1	KITLG	PCDH9
	DAGLA	KLC1	PCDHGA8
	DAPK1	KLF10	PCF11
	DAPP1	KLF12	PCGF3
	DBF4	KLF13	PCGF5
	DBF4B	KLF15	PCGF6
	DBIL5P	KLF3	PCM1
	DBR1	KLF4	PCNA
	DBT	KLF5	PCNP
	DBX2	KLF9	PCNT
	DCAF10	KLHDC10	PCSK2
	DCAF12	KLHDC9	PCSK5
	DCAF16	KLHL13	PDCD10
	DCAF17	KLHL15	PDCD2
	DCAF4	KLHL20	PDCD4
	DCAF4L1	KLHL23	PDCD7
	DCAF4L2	KLHL28	PDCL
	DCAF5	KLHL29	PDE10A
	DCAF7	KLHL36	PDE1A
	DCAF8L1	KLHL8	PDE5A
	DCBLD1	KLK7	PDE6D
	DCBLD2	KLRC4	PDE7A
	DCC	KLRK1	PDE7B
	DCDC5	KPNA1	PDE8B
	DCHS1	KPNA2	PDGFC
	DCK	KPNA4	PDGFRA
	DCLK1	KPNA5	PDHX
	DCLK2	KRIT1	PDIK1L
	DCLK3	KRR1	PDK4
	DCLRE1B	KSR2	PDLIM3
	DCLRE1C	L1CAM	PDLIM5
	DCP1A	L2HGDH	PDS5B
	DCP2	L3MBTL3	PDXK
	DCT	L3MBTL4	PDZD8
	DCTN5	LACTB2	PEA15
	DCUN1D1	LAMA4	PELI1
	DCUN1D3	LAMP2	PELI2
	DCUN1D4	LANCL1	PEX11B
	DCUN1D5	LARGE	PEX13
	DCX	LARP1	PEX14
	DDAH1	LARP4	PEX3
	DDHD1	LASP1	PFDN1
	DDHD2	LATS2	PFDN4
	DDIT3	LBR	PGAP1
	DDIT4L	LCOR	PGGT1B
	DDR1	LDOC1L	PGM2
	DDTL	LEMD3	PGRMC2
	DDX10	LENG8	PHACTR2
	DDX17	LEPROTL1	PHAX
	DDX18	LGR4	PHC2
	DDX20	LGR5	PHC3
	DDX21	LHFP	PHF10
	DDX23	LHX2	PHF12
	DDX3X	LIFR	PHF13
	DDX3Y	LIG4	PHF14
	DDX42	LIMCH1	PHF2
	DDX43	LIN28B	PHF20L1
	DDX46	LIN52	PHF23
	DDX5	LIN54	PHF3
	DDX50	LIN7C	PHF6
	DDX52	LIN9	PHLDA1
	DDX53	LIX1L	PIAS1
	DDX55	LMBR1	PIAS2
	DDX56	LMBRD1	PICALM
	DDX58	LMNB2	PIGM
	DDX59	LMX1B	PIK3AP1
	DDX6	LNX2	PIK3C2A
	DDX60	LOC728554	PIK3C3
	DDX60L	LONP2	PIK3CB
	DEAF1	LONRF1	PIM1
	DEGS1	LONRF2	PIM2
	DEK	LONRF3	PIP4K2A
	DENND1B	LPGAT1	PIP4K2B
	DENND3	LPP	PITPNB
	DENND4A	LRCH3	PITX2
	DENND4B	LRIG2	PJA2
	DENND4C	LRIG3	PKN2
	DENND5B	LRP12	PKNOX1
	DENR	LRP2	PLA2G12A
	DEPDC1	LRP5	PLA2R1
	DEPDC1B	LRP8	PLAG1
	DEPDC5	LRPPRC	PLEKHA1
	DEPDC7	LRRC57	PLEKHA5
	DEPTOR	LRRC58	PLEKHB2
	DERL1	LRRFIP2	PLK4
	DFFA	LRRTM4	PLS3
	DGAT1	LSM1	PLSCR1
	DGAT2	LSM14A	PLSCR4
	DGCR2	LSM14B	PLXNA2
	DGCR8	LSM5	PLXNA4
	DGKA	LSM6	PM20D2
	DGKB	LTBP3	PMAIP1
	DGKD	LTV1	PMP22
	DGKE	LUC7L	PMPCB
	DGKG	LUC7L2	PNMA1
	DGKH	LYAR	PNMA2
	DGKI	LYN	PNN
	DHDDS	LYPD6	PNPT1
	DHFR	LYPLAL1	PNRC1
	DHFRL1	LYRM7	PNRC2
	DHODH	LYSMD3	PODXL
	DHRS12	LZTFL1	POFUT1
	DHRS2	LZTS2	POGK
	DHRS4L2	MADD	POLD2
	DHTKD1	MAFG	POLH
	DHX32	MAGEF1	POLI
	DHX33	MAK16	POLK
	DHX35	MAL2	POLR1B
	DHX36	MALT1	POLR1C
	DHX57	MAML1	POLR2B
	DIAPH1	MAML2	POLR2F
	DIAPH2	MAML3	POLR2J
	DIAPH3	MAN1A1	POM121C
	DICER1	MAN1C1	POR
	DIDO1	MANBA	POU3F2
	DIO2	MANEA	POU4F2
	DIO3	MAP1B	PPA2
	DIP2A	MAP1LC3B	PPARGC1A
	DIP2B	MAP2K1	PPAT
	DIP2C	MAP3K1	PPFIA1
	DIRAS1	MAP3K4	PPFIBP1
	DIRAS2	MAP4K3	PPHLN1
	DIRC2	MAP7D3	PPIH
	DIS3	MAP9	PPM1A
	DIS3L	MAPK1	PPM1B
	DISC1	MAPK6	PPM1G
	DISP1	MAPKAP1	PPM1H
	DIXDC1	MAPKAPK2	PPM1K
	DKFZP434L187	MAPKAPK5	PPP1CB
	DKK1	MAPKBP1	PPP1CC
	DKK2	MAPRE1	PPP1R10
	DLAT	MAPRE2	PPP1R12A
	DLC1	MAPRE3	PPP1R14C
	DLD	MARCKS	PPP1R15B
	DLEU7	MARK4	PPP1R1C
	DLG1	MAST1	PPP1R3C
	DLG2	MASTL	PPP1R9B
	DLG3	MAT2B	PPP2CA
	DLGAP1	MATN2	PPP2R1B
	DLGAP2	MAX	PPP2R2A
	DLGAP4	MBD5	PPP2R2C
	DLGAP5	MBIP	PPP2R2D
	DLL1	MBNL1	PPP2R5A
	DLL3	MBNL2	PPP2R5C
	DLL4	MBNL3	PPP3R1
	DLX1	MBOAT2	PPP4R1
	DLX2	MBTD1	PPP6C
	DLX5	MCC	PPTC7
	DLX6	MCEE	PRDM10
	DMAP1	MCM3	PRDM8
	DMBT1	MCM4	PRDX6
	DMBX1	MCM8	PREPL
	DMC1	MCPH1	PRKAA1
	DMD	MCRS1	PRKACB
	DMPK	MDFIC	PRKAG2
	DMRT2	MDGA2	PRKAR1A
	DMRTC2	MDH1	PRKCA
	DMTF1	MDM1	PRKCD
	DMXL1	MDM2	PRKCE
	DMXL2	ME2	PRKD3
	DNA2	MECP2	PRKDC
	DNAH11	MED13	PRKG1
	DNAH12	MED13L	PRMT2
	DNAH14	MED14	PRNP
	DNAH3	MED17	PROM1
	DNAH5	MED23	PRPF18
	DNAH6	MED28	PRPF3
	DNAH8	MED4	PRPF39
	DNAH9	MED6	PRPF40A
	DNAJA2	MEF2D	PRR11
	DNAJA3	MEGF10	PRR12
	DNAJA4	MEGF9	PRRC1
	DNAJB1	MELK	PRRX1
	DNAJB12	MEMO1	PSD3
	DNAJB14	MET	PSEN1
	DNAJB4	METAP1	PSMA2
	DNAJB5	METTL10	PSMA4
	DNAJB7	METTL3	PSMC2
	DNAJB9	METTL7A	PSMD14
	DNAJC10	METTL8	PSMD7
	DNAJC13	MFAP1	PSMF1
	DNAJC15	MFAP3	PSMG1
	DNAJC16	MFF	PSMG2
	DNAJC19	MFGE8	PSPC1
	DNAJC2	MFHAS1	PSPH
	DNAJC21	MFN1	PTAR1
	DNAJC24	MFSD8	PTBP2
	DNAJC25-GNG10	MGAT2	PTCH1
	DNAJC3	MGAT3	PTCHD1
	DNAJC5	MGAT4A	PTEN
	DNAJC6	MGAT4B	PTER
	DNAJC8	MGEA5	PTGFRN
	DNAJC9	MIB1	PTK2B
	DNAL1	MIB2	PTP4A1
	DNM1L	MIER1	PTPN1
	DNM2	MIER3	PTPN13
	DNM3	MINA	PTPN14
	DNMBP	MINPP1	PTPN21
	DNTT	MIPOL1	PTPN6
	DNTTIP2	MITF	PTPRA
	DOCK1	MKI67	PTPRE
	DOCK10	MKL1	PTPRJ
	DOCK11	MKL2	PUM1
	DOCK2	MKLN1	PUM2
	DOCK3	MKNK2	PURA
	DOCK4	MKRN1	PURB
	DOCK5	MLLT10	PUS7
	DOCK6	MLLT4	PWP1
	DOCK7	MMAA	PWWP2A
	DOCK9	MMAB	PXDN
	DOK1	MMGT1	PXMP4
	DOK4	MMP14	PYGL
	DOK5	MMP15	QKI
	DOK6	MN1	QSER1
	DONSON	MND1	QSOX2
	DOPEY1	MNT	RAB10
	DPAGT1	MNX1	RAB11A
	DPH5	MOAP1	RAB11B
	DPM1	MON1B	RAB11FIP1
	DPP4	MORC2	RAB12
	DPY19L1	MORC3	RAB14
	DPY19L2	MORF4L2	RAB18
	DPY19L2P1	MOSPD2	RAB21
	DPY19L2P2	MOSPD3	RAB22A
	DPY19L3	MPHOSPH10	RAB27A
	DPY19L4	MPHOSPH6	RAB28
	DPY30	MPHOSPH8	RAB2A
	DPYS	MPHOSPH9	RAB2B
	DPYSL3	MPL	RAB31
	DRAM1	MPP5	RAB3GAP2
	DRD1	MPP6	RAB3IP
	DRD2	MPP7	RAB40C
	DROSHA	MPZL2	RAB5B
	DSC1	MREG	RAB6A
	DSC2	MRPL15	RAB6B
	DSC3	MRPL16	RABGAP1
	DSCAM	MRPL17	RABGEF1
	DSCAML1	MRPL18	RABGGTB
	DSCR3	MRPL19	RABL3
	DSE	MRPL22	RAD1
	DSEL	MRPL28	RAD17
	DSG1	MRPL3	RAD18
	DSG2	MRPL30	RAD21
	DSG3	MRPL34	RAD23B
	DST	MRPL35	RAD50
	DSTYK	MRPL39	RAD54B
	DTD1	MRPL44	RAI1
	DTL	MRPL49	RALBP1
	DTNA	MRPL50	RALGPS2
	DTWD1	MRPS16	RANBP2
	DTWD2	MRPS17	RAP1A
	DTX3	MRPS18A	RAP1B
	DTX4	MRPS18B	RAP1GDS1
	DUOXA2	MRPS22	RAP2C
	DUSP1	MRPS23	RAPGEF2
	DUSP11	MRPS25	RAPGEF4
	DUSP12	MRPS26	RAPGEF6
	DUSP16	MRPS27	RAPH1
	DUSP18	MRPS35	RASAL2
	DUSP19	MRPS36	RASGEF1B
	DUSP28	MRPS9	RASSF8
	DUSP4	MSC	RBAK
	DUSP6	MSH2	RBBP5
	DUSP8	MSH3	RBBP6
	DVL1	MSI1	RBBP8
	DYM	MSI2	RBM12B
	DYNC1H1	MSX1	RBM22
	DYNC1I2	MSX2	RBM23
	DYNC1LI2	MTA1	RBM25
	DYNC2LI1	MTA3	RBM26
	DYNLT3	MTAP	RBM27
	DYRK1A	MTBP	RBM28
	DYRK2	MTDH	RBM33
	DYRK3	MTF1	RBM39
	DYX1C1	MTF2	RBM5
	DZIP1	MTFR1	RBM7
	DZIP1L	MTHFD2	RBMS1
	DZIP3	MTHFS	RBMS2
	E2F3	MTM1	RBMX
	E2F5	MTMR1	RBPJ
	E2F6	MTMR12	RBPMS2
	E2F8	MTMR3	RC3H2
	E4F1	MTMR6	RCAN1
	EAF1	MTRF1	RCAN2
	EAPP	MTUS1	RCL1
	EBAG9	MTX3	RDH10
	EBF1	MUC16	RDH11
	EBF2	MXD1	REEP1
	EBF3	MXI1	REEP3
	ECHDC1	MYADM	REEP5
	ECM2	MYB	REL
	ECSCR	MYBPC3	RELL1
	ECT2	MYC	RERE
	ECT2L	MYCBP2	REST
	EDA	MYD88	REV1
	EDA2R	MYO15B	RFC3
	EDAR	MYO19	RFC4
	EDEM1	MYO1E	RFX2
	EDEM3	MYO5A	RGMA
	EDIL3	MYO5B	RGMB
	EDN2	MYO9A	RHBDD1
	EDNRA	MYSM1	RHEB
	EDNRB	MYT1	RHOF
	EEA1	N4BP2L2	RHOT1
	EED	NAALADL2	RHPN2
	EEF1E1	NAB1	RIC8B
	EEF2	NAF1	RICTOR
	EEF2K	NANP	RIF1
	EFCAB1	NAP1L1	RIMKLB
	EFCAB10	NAPB	RIOK1
	EFCAB5	NARS	RIOK2
	EFCAB7	NASP	RIT1
	EFEMP1	NAT1	RMND5A
	EFEMP2	NAT8L	RNF122
	EFHC1	NBEA	RNF125
	EFHC2	NBPF14	RNF128
	EFHD1	NBPF15	RNF13
	EFNA1	NCAM1	RNF138
	EFNA2	NCAPD2	RNF139
	EFNA5	NCAPD3	RNF149
	EFNB1	NCAPH	RNF169
	EFNB2	NCBP2	RNF180
	EFR3A	NCDN	RNF19A
	EFR3B	NCK1	RNF2
	EFTUD2	NCKAP1	RNF214
	EGF	NCL	RNF216
	EGFEM1P	NCOA1	RNF4
	EGFL6	NCOA3	RNF41
	EGFLAM	NCOA4	RNF44
	EGLN1	NCOA6	RNF6
	EGLN3	NCOA7	RNF8
	EGR1	NDC80	RNMT
	EGR2	NDEL1	RNPS1
	EGR3	NDFIP1	ROBO1
	EHBP1	NDUFA12	ROCK1
	EHF	NDUFB4	ROCK2
	EHHADH	NDUFC2	RP2
	EID1	NDUFS3	RPAIN
	EID2	NDUFV2	RPE
	EIF1AD	NEK1	RPGRIP1L
	EIF1AX	NEK2	RPL32P3
	EIF2AK1	NEK3	RPRD1A
	EIF2AK2	NEK7	RPRD1B
	EIF2AK3	NENF	RPRD2
	EIF2AK4	NET1	RPS29
	EIF2S1	NETO2	RPS3
	EIF3E	NEXN	RPS6KA3
	EIF3F	NF1	RPS6KA5
	EIF3G	NFAT5	RQCD1
	EIF3H	NFE2L2	RRM2B
	EIF3J	NFIA	RRN3
	EIF4A2	NFIL3	RRP15
	EIF4A3	NFKBIA	RSBN1
	EIF4B	NFKBIB	RSBN1L
	EIF4E	NFKBIZ	RSRC2
	EIF4E3	NFS1	RTN4
	EIF4ENIF1	NFYA	RUFY2
	EIF4G2	NFYB	RUNX1T1
	EIF4G3	NGDN	RWDD2A
	EIF5	NHEJ1	RWDD3
	EIF5A2	NHLRC2	RYBP
	EIF5AL1	NHS	SACM1L
	ELAC2	NIF3L1	SACS
	ELAVL1	NIN	SALL1
	ELAVL2	NINJ1	SAP18
	ELAVL3	NIP7	SAP30L
	ELF1	NIPA1	SASH1
	ELF2	NIPA2	SASS6
	ELF3	NISCH	SATB1
	ELK1	NKRF	SATB2
	ELK4	NKTR	SAV1
	ELL2	NLE1	SBF2
	ELMO1	NLGN1	SBNO1
	ELMO2	NLGN2	SCAMP1
	ELMOD1	NLGN4X	SCAPER
	ELMOD2	NLK	SCARB2
	ELOVL2	NLRP2	SCHIP1
	ELOVL4	NOL8	SCLT1
	ELOVL5	NOLC1	SCML1
	ELOVL6	NOMO2	SCML2
	ELOVL7	NOTCH2	SCN2A
	ELP2	NOV	SCRN1
	ELP4	NOVA1	SDC2
	EMB	NPAT	SDHD
	EMBP1	NPC1	SEC22B
	EMG1	NPEPPS	SEC23A
	EML1	NPM3	SEC24A
	EML4	NPNT	SEC24B
	EML5	NPTX1	SEC24D
	EMP1	NR1D1	SEC31A
	EMP2	NR2C2	SEC62
	EMX2	NR2F1	SEH1L
	EN1	NR2F2	SEL1L
	EN2	NR3C1	SEMA3C
	ENAH	NR4A1	SEMA3D
	ENAM	NR5A2	SEMA3E
	ENC1	NRCAM	SEMA4D
	ENOPH1	NRF1	SEMA6D
	ENOX2	NRIP1	SENP2
	ENPEP	NRP1	SENP6
	ENPP1	NRXN2	SEPHS1
	ENPP2	NRXN3	SEPSECS
	ENPP4	NSL1	SERAC1
	ENPP5	NSMCE2	SERBP1
	ENPP6	NT5DC1	SERINC1
	ENSA	NT5DC3	SERP1
	ENTHD1	NTN4	SERPINB5
	ENTPD1	NUCB2	SERPINB8
	ENTPD3	NUCKS1	SERPINH1
	ENTPD5	NUDCD1	SERTAD2
	ENTPD7	NUDCD2	SESTD1
	ENY2	NUDT10	SETD1A
	EOMES	NUDT12	SETD2
	EP400	NUDT21	SETD7
	EPAS1	NUDT3	SETX
	EPB41	NUDT4	SF3B1
	EPB41L1	NUDT7	SF3B2
	EPB41L2	NUF2	SF3B3
	EPB41L4A	NUFIP2	SFMBT2
	EPB41L4B	NUMB	SFRP1
	EPB41L5	NUP153	SFRP2
	EPC1	NUP160	SGCB
	EPC2	NUP205	SGK3
	EPCAM	NUP37	SGMS2
	EPGN	NUP50	SGOL1
	EPHA1	NUP54	SGPP1
	EPHA3	NUP93	SH2D3C
	EPHA4	NUP98	SH3BGRL
	EPHA5	NUPL2	SH3BGRL2
	EPHA7	NUS1	SH3BP5
	EPHA8	NUSAP1	SHC1
	EPHB1	NXF1	SHC3
	EPHB4	OAS2	SHISA3
	EPHX2	OAT	SHOC2
	EPM2AIP1	OBFC1	SIAH1
	EPS15	OCIAD1	SIN3A
	EPS15L1	OGFRL1	SIRT1
	EPS8	OIP5	SIX1
	EPT1	ONECUT2	SKI
	ERAP1	OPA1	SKP1
	ERAP2	OR1K1	SLBP
	ERBB4	ORMDL1	SLC12A7
	ERC1	ORMDL3	SLC16A1
	ERC2	OSBPL10	SLC16A14
	ERCC3	OSBPL11	SLC17A5
	ERCC4	OSBPL6	SLC19A2
	ERCC6	OSBPL8	SLC1A1
	ERCC6L	OSBPL9	SLC20A1
	EREG	OSGEPL1	SLC20A2
	ERI1	OSGIN2	SLC23A2
	ERI2	OSR2	SLC25A12
	ERLEC1	OSTM1	SLC25A21
	ERLIN2	OTUD1	SLC25A27
	ERMN	OTUD4	SLC25A32
	ERRFI1	OTUD6B	SLC25A37
	ESCO1	OTX1	SLC25A40
	ESCO2	OXA1L	SLC25A44
	ESD	OXR1	SLC26A2
	ESF1	P2RY6	SLC2A1
	ESM1	PA2G4	SLC2A12
	ESR1	PACRGL	SLC2A13
	ESRP1	PAFAH1B1	SLC30A5
	ESRRA	PAFAH1B2	SLC30A6
	ESRRB	PAG1	SLC30A7
	ESRRG	PAH	SLC30A9
	ESYT2	PAICS	SLC35A1
	ESYT3	PAIP1	SLC35A3
	ETF1	PAIP2	SLC35A5
	ETFB	PAK1IP1	SLC35E1
	ETFDH	PAK2	SLC35F2
	ETNK1	PAK3	SLC35F5
	ETNK2	PALB2	SLC37A3
	ETS1	PALM2-AKAP2	SLC38A1
	ETS2	PAM	SLC38A2
	ETV1	PANK1	SLC39A10
	ETV3	PANK2	SLC39A14
	ETV4	PANK3	SLC39A6
	ETV5	PANK4	SLC39A9
	EVI5	PAPD4	SLC41A2
	EVPLL	PAPD5	SLC44A5
	EWSR1	PAPOLA	SLC4A7
	EXD2	PAPOLG	SLC5A3
	EXO1	PAQR3	SLC5A8
	EXOC5	PARD3	SLC6A15
	EXOC6	PARD3B	SLC7A1
	EXOC6B	PARD6B	SLC7A11
	EXOC8	PARG	SLC7A14
	EXOG	PARP1	SLC7A2
	EXOSC10	PARP14	SLC7A6
	EXOSC9	PARP2	SLC9A2
	EXPH5	PARP6	SLC9A6
	EXTL2	PASK	SLC9A7
	EXTL3	PATL1	SLCO4C1
	EYA1	PAX3	SLK
	EYA4	PAX9	SLTM
	EYS	PBK	SLU7
	EZH1	PBX3	SMAD1
	EZR	PCBP1	SMAD2
	F11	PCBP2	SMAD4
	F2R	PCDH11Y	SMAD7
	F2RL1	PCDH7	SMAP1
	F2RL2	PCDH9	SMARCA2
	F3	PCDHA5	SMARCAD1
	F5	PCDHGA12	SMC1A
	F7	PCDHGA8	SMC3
	FA2H	PCF11	SMC6
	FAAH2	PCGF3	SMCHD1
	FABP2	PCGF5	SMNDC1
	FADS1	PCGF6	SMOC1
	FAF2	PCM1	SMPDL3A
	FAH	PCNA	SNAI2
	FAHD1	PCNP	SNAP23
	FAIM2	PCNT	SNAP29
	FAM102B	PCSK2	SNAPC1
	FAM103A1	PCSK5	SNCA
	FAM104A	PDCD10	SNRK
	FAM105A	PDCD2	SNRPB
	FAM107A	PDCD4	SNRPB2
	FAM107B	PDCD7	SNRPE
	FAM110B	PDCL	SNTB1
	FAM110C	PDCL2	SNTB2
	FAM111A	PDE10A	SNUPN
	FAM114A1	PDE1A	SNX10
	FAM117A	PDE5A	SNX12
	FAM120A	PDE6D	SNX13
	FAM120C	PDE7A	SNX16
	FAM122A	PDE7B	SNX2
	FAM122B	PDE8B	SNX25
	FAM124A	PDGFC	SNX30
	FAM126A	PDGFRA	SNX4
	FAM126B	PDGFRL	SNX9
	FAM127A	PDHX	SOCS4
	FAM129A	PDIA6	SOCS5
	FAM133A	PDIK1L	SOCS6
	FAM133B	PDK4	SON
	FAM134A	PDLIM3	SORBS1
	FAM135A	PDLIM5	SORBS2
	FAM136A	PDS5B	SORCS1
	FAM13A	PDXK	SORCS3
	FAM13B	PDZD8	SORT1
	FAM13C	PEA15	SOS2
	FAM149A	PELI1	SOX6
	FAM149B1	PELI2	SOX9
	FAM150A	PEX11B	SP1
	FAM150B	PEX13	SP3
	FAM151B	PEX14	SP4
	FAM160B1	PEX3	SPAG1
	FAM161A	PEX5	SPAG16
	FAM161B	PFDN1	SPAST
	FAM162A	PFDN4	SPATA13
	FAM163A	PFDN5	SPATA6
	FAM167A	PFDN6	SPC25
	FAM168B	PFKM	SPCS1
	FAM169A	PFN2	SPCS3
	FAM171A1	PGAM1	SPECC1L
	FAM171B	PGAP1	SPIN1
	FAM172A	PGGT1B	SPIRE1
	FAM173B	PGM2	SPIRE2
	FAM174A	PGRMC2	SPRED2
	FAM177A1	PHACTR2	SPRY1
	FAM179A	PHACTR3	SPRY2
	FAM179B	PHAX	SPTBN1
	FAM184A	PHC2	SPTLC1
	FAM185A	PHC3	SPTLC2
	FAM186A	PHF1	SQLE
	FAM188A	PHF10	SRD5A1
	FAM196A	PHF12	SREBF1
	FAM198B	PHF13	SRFBP1
	FAM199X	PHF14	SRGAP1
	FAM19A2	PHF2	SRI
	FAM19A4	PHF20L1	SRRM1
	FAM19A5	PHF21A	SS18L1
	FAM200B	PHF23	SS18L2
	FAM201A	PHF3	SSBP1
	FAM20B	PHF6	SSBP2
	FAM26E	PHF8	SSTR1
	FAM26F	PHLDA1	SSX2IP
	FAM32A	PHTF1	ST18
	FAM35A	PI4K2A	ST7L
	FAM3C	PIAS1	ST8SIA4
	FAM43A	PIAS2	STAG1
[truncated: 4,903 more rows]

## Sheet: Fig S2F
Figure S2F
		Statistical Significance:	p<0.000001	p<0.000001	p<0.000001	p<0.000001
PUM1&2 DOWN	PRE	BOUND	[PRE] vs [BOUND]	[PUM1&2DOWN] vs [BOUND]	[PUM1&2DOWN] vs [PRE]	[PUM1&2DOWN] vs [PRE] vs [BOUND]
AARS	MARCH_1	AAMP	AAMP	APEX1	ABCA2	ARF6
AARSD1	MARCH_5	AASDHPPT	AASDHPPT	ARF6	ABCC2	ARHGEF19
ABCA2	MARCH_6	ABAT	ABCC5	ARHGEF19	ABCC3	ARID5B
ABCB9	MARCH_7	ABCB1	ABHD10	ARID5B	AMZ2	BRD3
ABCC2	SEPT_1	ABCC5	ABHD13	BRD3	ANAPC4	BTBD2
ABCC3	SEPT_7	ABHD10	ABHD3	BTBD2	ANKRD26	C12orf66
ABHD14B	SEPT_8	ABHD13	ABHD5	C12orf66	ANKRD36	C17orf58
AC002310.4	SEPT_10	ABHD3	ABI1	C17orf58	APPBP2	CALD1
AC007637.1	A1CF	ABHD5	ABI2	C1orf131	ARF6	CAV1
AC008035.1	A2M	ABI1	ABL2	CALD1	ARHGAP18	CCDC25
AC008443.5	AADACL3	ABI2	ABLIM1	CAV1	ARHGEF19	CEP290
AC008878.1	AAGAB	ABL2	ABLIM3	CCDC112	ARID5B	CERK
AC009065.9	AAK1	ABLIM1	ACAP2	CCDC25	ARL4A	CMTM4
AC010503.4	AAMP	ABLIM3	ACBD3	CCDC57	ASF1B	CREBL2
AC010655.2	AASDH	ACAP2	ACBD5	CDC23	ATP2B4	DEAF1
AC012314.4	AASDHPPT	ACBD3	ACHE	CEP290	ATXN7L3B	DHX32
AC012314.6	AASS	ACBD5	ACSL3	CERK	BDNF	DIAPH3
AC015813.1	ABCA1	ACBD6	ACSL4	CETN3	BRD3	DST
AC017116.2	ABCA10	ACHE	ACTG1	CFDP1	BTBD2	EEF2
AC018521.1	ABCA13	ACOT4	ACTR10	CMTM4	C12orf66	ELAVL1
AC020688.1	ABCA2	ACOT9	ACTR3	CPOX	C17orf58	GPR161
AC022596.2	ABCA4	ACSL3	ACTR3B	CREBL2	CALD1	GTSE1
AC024293.1	ABCA5	ACSL4	ACVR1B	CSDE1	CAV1	HMGB1
AC025183.1	ABCA6	ACTG1	ACVR2A	DEAF1	CCDC25	HNRNPUL2
AC025362.1	ABCA8	ACTL6A	ACVR2B	DHX32	CD44	HOXA10
AC026362.1	ABCA9	ACTR10	ADAM22	DIAPH3	CDCA5	INPP4B
AC034102.1	ABCB11	ACTR1B	ADAM9	DST	CEP290	ITGB3BP
AC046185.1	ABCB5	ACTR3	ADAMTS1	EEF2	CEP63	KITLG
AC079781.5	ABCB7	ACTR3B	ADAMTS4	ELAVL1	CERK	L3MBTL3
AC084125.4	ABCC10	ACVR1	ADAMTS5	EML2	CHD6	LMNB2
AC091729.3	ABCC2	ACVR1B	ADAMTS6	GPR161	CHPT1	MAL2
AC093010.3	ABCC3	ACVR2A	ADAR	GTSE1	CIT	MBNL2
AC093323.1	ABCC4	ACVR2B	ADCY10	H2AFY2	CMTM4	MKI67
AC093525.1	ABCC5	ACYP1	ADCY7	HMGB1	CREBL2	MPP7
AC099518.3	ABCC8	ADAM19	ADCY9	HMMR	CRLF3	MTUS1
AC103591.3	ABCC9	ADAM22	ADD3	HNRNPUL2	CWC27	NAP1L1
AC104024.2	ABCE1	ADAM9	ADIPOR2	HOXA10	DDX46	NKTR
AC105219.1	ABCF1	ADAMTS1	ADM	IGBP1	DEAF1	NUCKS1
AC105219.5	ABCF3	ADAMTS4	ADNP	ING5	DFFA	NUDT3
AC115223.1	ABCG1	ADAMTS5	ADNP2	INPP4B	DHFR	PDCD7
AC135050.2	ABCG5	ADAMTS6	ADSS	IQCE	DHRS2	PIP4K2B
AC135586.2	ABHD10	ADAR	AEBP2	ITGB3BP	DHRS4L2	PRKDC
AC139530.1	ABHD11	ADARB1	AFF1	KIF5C	DHX32	PRMT2
AC231657.3	ABHD12	ADCK2	AFF3	KITLG	DIAPH3	PYGL
AC243547.3	ABHD12B	ADCY10	AFTPH	L3MBTL3	DNAJC21	RAD50
AC244107.1	ABHD13	ADCY3	AGA	LMNB2	DST	RBBP8
AC246787.1	ABHD2	ADCY7	AGAP3	MAGEF1	EEF2	SERTAD2
AC246787.3	ABHD3	ADCY9	AGFG1	MAL2	EIF4A2	SPECC1L
ACAD9	ABHD5	ADD2	AGGF1	MBNL2	ELAVL1	STK39
AD000671.2	ABI1	ADD3	AGPAT3	MKI67	ETFB	SURF6
AGBL5	ABI2	ADIPOR2	AGPAT5	MPP7	ETV1	TCF7L2
AGPAT1	ABI3BP	ADM	AGPS	MTUS1	FAM122B	TIAM1
AHCY	ABL2	ADNP	AGTPBP1	NAP1L1	FAM149B1	TMEM209
AIF1L	ABLIM1	ADNP2	AHCTF1	NKTR	FBXO9	TNRC6B
AKR7A2	ABLIM2	ADO	AHDC1	NR2F1	GINS2	TRIB1
AL009174.1	ABLIM3	ADSS	AHR	NT5DC1	GMPR2	UBE3C
AL121845.2	ABR	AEBP2	AHSA1	NUCKS1	GNAZ	UPF2
AL133325.3	ABRA	AFAP1L2	AHSG	NUDCD2	GNPAT	VPS26A
AL133477.1	ACAD8	AFF1	AICDA	NUDT3	GNPDA1	ZC3H13
AL136419.1	ACADL	AFF3	AIG1	PAICS	GPR161	ZC3H6
AL138759.1	ACADM	AFF4	AIP	PDCD7	GTSE1	ZMYND11
AL160236.1	ACADSB	AFTPH	AKAP1	PIP4K2B	H2AFJ	ZNF397
AL355987.4	ACAN	AGA	AKAP12	PKIG	H6PD
AL355987.6	ACAP2	AGAP3	AKAP13	PPP3CA	HIRA
AL356124.1	ACBD3	AGFG1	AKAP7	PRC1	HMGB1
AL365181.3	ACBD5	AGGF1	AKT2	PRKDC	HNRNPUL2
AL451136.1	ACBD7	AGPAT3	AKT3	PRMT2	HOXA10
ALDH3B1	ACCSL	AGPAT5	AKTIP	PYCR1	HS1BP3
AMZ2	ACHE	AGPS	ALG10	PYGL	HS6ST1
AMZ2P1	ACOT11	AGTPBP1	ALG10B	RAD50	IBTK
ANAPC4	ACOXL	AGXT	AMIGO2	RBBP8	IFT122
ANKRD13B	ACP1	AHCTF1	AMOTL1	RBM15B	INPP4B
ANKRD26	ACP6	AHCYL2	AMOTL2	SERTAD2	ITGB3BP
ANKRD36	ACSL1	AHDC1	ANAPC13	SMYD3	JMY
ANKRD36C	ACSL3	AHR	ANGEL2	SPECC1L	KIF15
AP000769.3	ACSL4	AHSA1	ANGPT1	SSU72	KITLG
AP001816.1	ACSL5	AHSG	ANK2	STK39	L3MBTL3
AP001931.1	ACSL6	AICDA	ANK3	STX2	LARS
AP002360.1	ACSS3	AIFM1	ANKH	SURF6	LIAS
APEH	ACTA1	AIG1	ANKLE2	TCF7L2	LMNB2
APEX1	ACTA2	AIP	ANKRD10	THYN1	MAGI1
APOBEC3C	ACTB	AK2	ANKRD12	TIAM1	MAL2
APPBP2	ACTC1	AKAP1	ANKRD17	TMED8	MBNL2
ARF6	ACTG1	AKAP12	ANKRD36B	TMEM209	MCM7
ARHGAP18	ACTN1	AKAP13	ANKRD40	TNRC6B	MKI67
ARHGAP4	ACTR10	AKAP7	ANKRD50	TRIAP1	MKX
ARHGEF19	ACTR2	AKAP8	ANKS1B	TRIB1	MPP7
ARID5B	ACTR3	AKT2	ANLN	UBE3C	MSH6
ARL2	ACTR3B	AKT3	ANO5	UPF2	MTIF2
ARL4A	ACTR5	AKTIP	ANP32A	VPS26A	MTUS1
ASF1B	ACTR6	ALB	ANP32B	XRCC1	MYH14
ASIC1	ACVR1B	ALDH1A2	ANP32E	ZC3H13	NAP1L1
ASMTL	ACVR1C	ALDOB	AOC3	ZC3H6	NDRG4
ATF5	ACVR2A	ALG10	AP1S1	ZMYND11	NEBL
ATF6B	ACVR2B	ALG10B	AP1S3	ZNF397	NEK9
ATP2B4	ACVRL1	ALKBH1	AP3M2		NFIC
ATP5MC2	ADAM10	ALPL	APBB2		NKTR
ATP6AP1L	ADAM11	ALS2CL	APC		NPM1
ATP6V0E2	ADAM12	AMH	API5		NPTXR
ATRAID	ADAM17	AMIGO2	APP		NR1D2
ATRIP	ADAM22	AMMECR1L	APPL1		NRARP
ATXN7L3B	ADAM23	AMOTL1	AQP3		NUCKS1
BAIAP2-DT	ADAM32	AMOTL2	ARAF		NUDT3
BAZ1B	ADAM33	AMPH	ARCN1		NUP210
BBOF1	ADAM8	ANAPC10	AREG		OGDHL
BDH1	ADAM9	ANAPC13	ARF1		PCLO
BDNF	ADAMTS1	ANGEL2	ARF6		PDCD7
BEX2	ADAMTS10	ANGPT1	ARFGAP3		PDE4B
BEX3	ADAMTS12	ANK2	ARFGEF1		PHLDB2
BIRC5	ADAMTS18	ANK3	ARFGEF2		PIGX
BMP4	ADAMTS19	ANKAR	ARFIP1		PIP4K2B
BOD1	ADAMTS20	ANKFN1	ARGLU1		PMS1
BOP1	ADAMTS3	ANKH	ARHGAP12		PRKDC
BRD3	ADAMTS4	ANKHD1	ARHGAP28		PRMT2
BRK1	ADAMTS5	ANKLE2	ARHGAP5		PRPF31
BTBD2	ADAMTS6	ANKRD10	ARHGEF11		PSIP1
C12orf66	ADAMTS9	ANKRD12	ARHGEF12		PSMD1
C17orf58	ADAMTSL1	ANKRD16	ARHGEF19		PTPN18
C19orf54	ADAMTSL3	ANKRD17	ARHGEF3		PYGL
C19orf81	ADAR	ANKRD36B	ARHGEF7		RAB3A
C1orf131	ADARB2	ANKRD40	ARID1B		RAD50
C2CD2	ADAT2	ANKRD50	ARID2		RAP2B
C9orf116	ADCK3	ANKRD9	ARID4A		RASSF3
CALD1	ADCK4	ANKS1B	ARID4B		RBBP4
CASC8	ADCY1	ANLN	ARID5B		RBBP8
CAV1	ADCY10	ANO10	ARL5A		RDX
CBLC	ADCY2	ANO5	ARL5B		SAE1
CBX7	ADCY5	ANO6	ARL6		SCNN1A
CBY1	ADCY7	ANP32A	ARL6IP1		SERTAD2
CCDC112	ADCY9	ANP32B	ARL6IP5		SH3RF1
CCDC18	ADCYAP1	ANP32E	ARL6IP6		SHMT1
CCDC24	ADCYAP1R1	ANXA5	ARL8A		SKA1
CCDC25	ADD1	AOC3	ARL8B		SLC25A11
CCDC34	ADD3	AP1G1	ARMC1		SMC5
CCDC57	ADH1B	AP1S1	ARMCX6		SOX4
CCDC85B	ADH4	AP1S3	ARNTL		SPATS2
CD44	ADHFE1	AP3M2	ARPC5		SPECC1L
CDC23	ADIPOR2	AP4S1	ARRDC1		SPEN
CDCA5	ADK	APBB2	ARSK		SRD5A3
CDCA7L	ADM	APC	ARV1		SREK1
CDH24	ADNP	APEX1	ASAH1		ST13
CDPF1	ADNP2	APEX2	ASAP1		STK39
CENPB	ADRA1A	API5	ASAP2		SUPT16H
CENPM	ADRA1B	APIP	ASCC2		SURF6
CENPS-CORT	ADRA1D	APOLD1	ASCC3		TADA2A
CEP152	ADRA2A	APOOL	ASF1A		TCF7L2
CEP250	ADRB1	APP	ASH1L		TIAM1
CEP290	ADRBK2	APPL1	ASPH		TMCO4
CEP295	ADRM1	AQP3	ASPM		TMEM209
CEP63	ADSS	ARAF	ASXL1		TMOD2
CEP89	ADSSL1	ARCN1	ASXL2		TNRC6B
CERK	AEBP2	AREG	ATAD1		TRAF3IP1
CES2	AES	ARF1	ATAD2		TRIB1
CETN3	AFAP1	ARF4	ATF2		TRIM69
CFAP97	AFF1	ARF6	ATF7IP		TSEN34
CFDP1	AFF2	ARFGAP3	ATG10		TTC3
CHAF1B	AFF3	ARFGEF1	ATG3		TYW1
CHD6	AFG3L2	ARFGEF2	ATL1		UBE3C
CHID1	AFTPH	ARFIP1	ATL2		UPF2
CHPT1	AGA	ARGLU1	ATM		UPF3B
CIRBP	AGAP1	ARHGAP12	ATMIN		USP48
CIT	AGAP3	ARHGAP25	ATP11A		VPS26A
CLEC11A	AGBL2	ARHGAP28	ATP11B		VPS39
CMTM4	AGBL3	ARHGAP5	ATP11C		WNT16
CNFN	AGBL4	ARHGDIB	ATP13A3		ZC3H13
CNNM3	AGER	ARHGEF11	ATP1B3		ZC3H6
CNPY2	AGFG1	ARHGEF12	ATP2A1		ZMYND11
COASY	AGGF1	ARHGEF19	ATP2B1		ZNF182
COMTD1	AGK	ARHGEF2	ATP5C1		ZNF397
COQ4	AGL	ARHGEF3	ATP5G3		ZNF627
COQ5	AGPAT3	ARHGEF7	ATP5S		ZNF76
COX14	AGPAT5	ARID1B	ATP6AP1
CPNE7	AGPS	ARID2	ATP6AP2
CPOX	AGT	ARID4A	ATP6V1B2
CREB3L4	AGTPBP1	ARID4B	ATP6V1C1
CREBL2	AGTR1	ARID5B	ATP9A
CRLF3	AHCTF1	ARL1	ATR
CSDE1	AHDC1	ARL5A	ATRN
CTXN1	AHI1	ARL5B	ATRNL1
CUTA	AHNAK	ARL6	ATXN1L
CWC27	AHR	ARL6IP1	ATXN2
D2HGDH	AHSA1	ARL6IP5	ATXN7
DANCR	AHSG	ARL6IP6	AURKA
DBP	AICDA	ARL8A	AXIN1
DCPS	AIDA	ARL8B	AXIN2
DCTPP1	AIG1	ARMC1	AZI2
DDB2	AIM1	ARMC10	AZIN1
DDN-AS1	AIMP1	ARMC9	B3GNT5
DDX19A	AIP	ARMCX2	B4GALT1
DDX46	AK3	ARMCX3	B4GALT5
DEAF1	AK5	ARMCX6	B4GALT6
DENND6A	AK7	ARNTL	BAALC
DFFA	AKAP1	ARPC3	BACH1
DGLUCY	AKAP10	ARPC5	BACH2
DGUOK-AS1	AKAP11	ARPC5L	BAG4
DHFR	AKAP12	ARRDC1	BAHCC1
DHRS11	AKAP13	ARSK	BAHD1
DHRS2	AKAP2	ARTN	BAIAP2
DHRS4L2	AKAP5	ARV1	BAIAP2L1
DHX32	AKAP6	ASAH1	BAP1
DIAPH3	AKAP7	ASAP1	BAZ2B
DLGAP1-AS1	AKAP8L	ASAP2	BBC3
DNAJC21	AKAP9	ASB1	BBS10
DNAJC4	AKIRIN1	ASB8	BBS7
DNAL4	AKIRIN2	ASCC2	BCAP29
DNPH1	AKNA	ASCC3	BCAR1
DOHH	AKR1C2	ASF1A	BCAR3
DPM3	AKT2	ASH1L	BCAS3
DPYSL5	AKT3	ASNSD1	BCKDHB
DSN1	AKTIP	ASPH	BCL10
DST	ALAS1	ASPM	BCL11A
EDEM2	ALCAM	ASTE1	BCL2L1
EEF2	ALDH1A1	ASXL1	BCL2L11
EHMT2	ALDH1L2	ASXL2	BCL3
EIF2D	ALDH6A1	ATAD1	BCL6
EIF3A	ALDH7A1	ATAD2	BCL9L
EIF4A2	ALDH9A1	ATF2	BCOR
ELAVL1	ALG1	ATF7IP	BEND7
ELFN1-AS1	ALG10	ATG10	BEX4
EMC3-AS1	ALG10B	ATG3	BICD1
EME1	ALG2	ATL1	BLCAP
EML2	ALG5	ATL2	BLOC1S2
ENDOG	ALG6	ATM	BLZF1
ENOSF1	ALG9	ATMIN	BMP2
ENTR1	ALKBH8	ATN1	BMPR1B
ERI3	ALLC	ATP11A	BMPR2
ERP29	ALMS1	ATP11B	BNIP2
ERVFRD-3	ALPK1	ATP11C	BNIP3L
ETFB	ALPK2	ATP13A3	BPTF
ETV1	ALPK3	ATP1B3	BRD1
EVA1C	ALS2	ATP2A1	BRD2
EXOSC6	ALS2CR11	ATP2B1	BRD3
F12	AMD1	ATP5C1	BRD7
FADS2	AMDHD1	ATP5G3	BRMS1L
FAM122B	AMHR2	ATP5S	BRPF1
FAM133DP	AMIGO2	ATP6AP1	BRPF3
FAM149B1	AMMECR1	ATP6AP2	BRWD1
FAM192A	AMN1	ATP6V1B2	BTAF1
FAM20C	AMOTL1	ATP6V1C1	BTBD1
FAM210B	AMOTL2	ATP6V1G1	BTBD2
FAM216A	AMTN	ATP6V1H	BTBD3
FAM234A	AMY1A	ATP8B2	BTBD7
FAM71E1	AMY2B	ATP9A	BTG1
FAM89B	AMZ2	ATR	BTNL8
FAM92A	ANAPC1	ATRN	BUB1
FBL	ANAPC13	ATRNL1	BUB1B
FBXO2	ANAPC16	ATXN1L	BUB3
FBXO24	ANAPC4	ATXN2	C10orf88
FBXO44	ANGEL1	ATXN7	C12orf29
FBXO9	ANGEL2	AUH	C12orf4
FEN1	ANGPT1	AURKA	C12orf66
FLOT1	ANGPT2	AXIN1	C14orf119
FP565260.2	ANGPTL1	AXIN2	C14orf2
FTO	ANGPTL2	AZI2	C14orf37
FTSJ3	ANGPTL3	AZIN1	C14orf79
G6PC3	ANGPTL7	B3GAT2	C15orf40
GAA	ANK2	B3GNT2	C15orf61
GAMT	ANK3	B3GNT5	C16orf52
GAS5	ANKFY1	B4GALT1	C16orf70
GAS6-AS1	ANKH	B4GALT5	C16orf87
GATD1	ANKIB1	B4GALT6	C17orf58
GATD3A	ANKLE2	BAALC	C18orf21
GFY	ANKMY2	BACE2	C18orf25
GINS2	ANKRA2	BACH1	C18orf54
GMPR2	ANKRD1	BACH2	C1orf52
GNAZ	ANKRD10	BAG3	C21orf91
GNB1L	ANKRD11	BAG4	C2orf49
GNPAT	ANKRD12	BAHCC1	C3orf33
GNPDA1	ANKRD13A	BAHD1	C3orf58
GOLGA8A	ANKRD13C	BAIAP2	C4orf33
GOLGA8B	ANKRD17	BAIAP2L1	C4orf46
GPAT2	ANKRD18A	BAP1	C5orf15
GPAT2P2	ANKRD20A3	BARD1	C5orf24
GPR161	ANKRD20A4	BAZ2A	C6orf1
GSS	ANKRD20A8P	BAZ2B	C6orf106
GSTZ1	ANKRD22	BBC3	C6orf136
GTF2H3	ANKRD26	BBS10	C7orf31
GTSE1	ANKRD26P1	BBS7	C8orf34
H1FX	ANKRD27	BCAP29	C9orf78
H2AFJ	ANKRD28	BCAR1	CA8
H2AFX	ANKRD31	BCAR3	CAB39
H2AFY	ANKRD33B	BCAS2	CACNB2
H2AFY2	ANKRD34B	BCAS3	CACNB4
H3F3BP1	ANKRD34C	BCDIN3D	CADM1
H6PD	ANKRD36	BCKDHB	CADPS2
HADH	ANKRD36B	BCL10	CALCOCO2
HAGHL	ANKRD36BP2	BCL11A	CALCRL
HCFC1R1	ANKRD40	BCL2L1	CALD1
HELLPAR	ANKRD42	BCL2L11	CALM1
HELLS	ANKRD44	BCL2L2	CALM2
HEXD	ANKRD45	BCL3	CALM3
HIGD2A	ANKRD46	BCL6	CALU
HINT2	ANKRD49	BCL9L	CAMK2D
HIRA	ANKRD50	BCOR	CAMKK2
HIRIP3	ANKRD52	BEND7	CAMTA2
HIST1H1C	ANKRD55	BEX4	CAND1
HIST2H2AC	ANKRD6	BICD1	CANX
HJURP	ANKRD7	BID	CAPN2
HMGB1	ANKS1A	BIRC3	CAPN7
HMGB1P10	ANKS1B	BIRC6	CAPRIN1
HMGB1P20	ANKS4B	BLCAP	CAPS2
HMGB1P37	ANKS6	BLMH	CAPZA2
HMGB1P4	ANKZF1	BLOC1S2	CASC4
HMGB1P5	ANLN	BLZF1	CASD1
HMGB1P6	ANO1	BMI1	CASK
HMGB1P8	ANO3	BMP2	CASP3
HMMR	ANO4	BMP2K	CASQ2
HNRNPUL2	ANO5	BMPR1B	CAV1
HOXA10	ANP32A	BMPR2	CBFB
HOXB7	ANP32B	BNIP2	CBL
HOXB9	ANP32E	BNIP3L	CBWD1
HOXC-AS1	ANPEP	BOK	CBX3
HS1BP3	ANTXR1	BPTF	CBX4
HS3ST1	ANTXR2	BRAF	CBX8
HS6ST1	ANXA11	BRD1	CCAR1
HSPBP1	ANXA2P3	BRD2	CCDC117
HSPD1P4	AOC3	BRD3	CCDC12
HTR7	AP1AR	BRD7	CCDC125
IAH1	AP1S1	BRI3	CCDC126
IBTK	AP1S3	BRMS1L	CCDC14
IFT122	AP2B1	BRPF1	CCDC25
IFT27	AP2M1	BRPF3	CCDC43
IFT57	AP3M2	BRWD1	CCDC50
IGBP1	AP4B1	BSDC1	CCDC6
IMPA2	AP4E1	BTAF1	CCDC61
IMPDH2	APAF1	BTBD1	CCDC77
ING4	APBA1	BTBD2	CCDC82
ING5	APBA2	BTBD3	CCNA2
INO80B-WBP1	APBB1IP	BTBD7	CCNB2
INPP4B	APBB2	BTG1	CCND2
IQCE	APC	BTG3	CCNE2
ISYNA1	APC2	BTN3A3	CCNG2
ITGB3BP	APCDD1	BTNL8	CCNH
JMY	APH1B	BUB1	CCNL1
JPX	API5	BUB1B	CCNT2
JUND	APLF	BUB3	CCNY
KANSL3	APLN	C10orf11	CCR5
KAT6B	APOBEC4	C10orf88	CCR6
KAZALD1	APOF	C11orf58	CD2AP
KCNH3	APOL3	C11orf63	CD46
KCNQ1OT1	APOL6	C12orf29	CD47
KIF15	APP	C12orf4	CD58
KIF5C	APPBP2	C12orf49	CD9
KIFAP3	APPL1	C12orf66	CDC123
KITLG	APTX	C14orf119	CDC14A
KMT2E-AS1	AQP2	C14orf2	CDC14B
KNOP1	AQP3	C14orf37	CDC27
KRT19	AQP4	C14orf79	CDC42EP3
L3MBTL3	AQP6	C15orf40	CDC42SE2
LAGE3	AQR	C15orf61	CDC7
LARS	AR	C16orf52	CDCA7
LENG9	ARAF	C16orf62	CDCA8
LHPP	ARAP1	C16orf70	CDH18
LIAS	ARAP2	C16orf72	CDH2
LIG1	ARCN1	C16orf87	CDH7
LINC01315	AREG	C17orf58	CDK6
LINC01405	ARF1	C18orf21	CDK7
LINC01963	ARF3	C18orf25	CDKN1A
LIPE-AS1	ARF6	C18orf32	CDKN1B
LMNB2	ARFGAP3	C18orf54	CDKN2AIP
LMTK3	ARFGEF1	C1GALT1	CDON
LOXL1	ARFGEF2	C1GALT1C1	CDR2
LRRC20	ARFIP1	C1orf131	CDS2
LRRCC1	ARG1	C1orf27	CEBPB
LSM4	ARG2	C1orf35	CEBPD
LTBP4	ARGLU1	C1orf43	CENPA
LYRM1	ARHGAP11A	C1orf52	CENPE
MACROD1	ARHGAP12	C20orf24	CENPJ
MAGEF1	ARHGAP17	C21orf91	CENPN
MAGI1	ARHGAP18	C2orf49	CEP120
MAL2	ARHGAP21	C2orf61	CEP135
MANBAL	ARHGAP23	C3AR1	CEP170
MARVELD1	ARHGAP24	C3orf33	CEP290
MBNL2	ARHGAP26	C3orf58	CEP350
MCM2	ARHGAP28	C4orf32	CEP70
MCM5	ARHGAP29	C4orf33	CEP76
MCM6	ARHGAP31	C4orf46	CERK
MCM7	ARHGAP32	C5orf15	CGGBP1
MCRIP1	ARHGAP39	C5orf24	CHD1
MCRIP2	ARHGAP42	C6orf1	CHD2
MED11	ARHGAP44	C6orf106	CHD7
MED29	ARHGAP5	C6orf136	CHD9
METAP2	ARHGAP8	C6orf141	CHEK1
METRN	ARHGEF10	C6orf203	CHEK2
METTL23	ARHGEF10L	C7orf31	CHIC1
METTL27	ARHGEF11	C8orf34	CHM
MEX3D	ARHGEF12	C8orf37	CHMP1A
MFSD3	ARHGEF15	C9orf40	CHMP2B
MIEN1	ARHGEF16	C9orf64	CHMP4C
MINCR	ARHGEF18	C9orf78	CHMP7
MIR378I	ARHGEF19	CA12	CHN2
MIR4680	ARHGEF26	CA2	CHRAC1
MIR7705	ARHGEF3	CA8	CHST9
MKI67	ARHGEF33	CAB39	CHSY1
MKX	ARHGEF37	CACHD1	CHSY3
MLST8	ARHGEF38	CACNA1A	CHUK
MMP24OS	ARHGEF6	CACNA1D	CISD1
MNX1-AS1	ARHGEF7	CACNB2	CISD2
MPI	ARHGEF9	CACNB4	CISD3
MPND	ARID1A	CADM1	CKAP2L
MPP7	ARID1B	CADM4	CKAP5
MRPL1	ARID2	CADPS2	CKS2
MRPL48	ARID3A	CALCOCO2	CLASP1
MRPS21	ARID4A	CALCRL	CLASP2
MSH5-SAPCD1	ARID4B	CALD1	CLCN3
MSH6	ARID5B	CALM1	CLDN1
MT2A	ARIH1	CALM2	CLDND1
MTHFD1	ARL13B	CALM3	CLEC16A
MTIF2	ARL14	CALU	CLIC4
MTUS1	ARL17A	CAMK2D	CLINT1
MYH14	ARL4A	CAMK2N2	CLIP1
NAP1L1	ARL5A	CAMKK2	CLIP4
NCOR2	ARL5B	CAMTA2	CLK1
NDRG4	ARL6	CAND1	CLK2
NDUFA7	ARL6IP1	CANX	CLK4
NDUFS2	ARL6IP5	CAPN2	CLSTN1
NEBL	ARL6IP6	CAPN7	CLSTN3
NEIL2	ARL8A	CAPRIN1	CMIP
NEK9	ARL8B	CAPS	CMTM4
NES	ARMC1	CAPS2	CNBP
NFIC	ARMC3	CAPZA1	CNNM1
NHP2	ARMC8	CAPZA2	CNOT1
NIPSNAP1	ARMCX1	CARS2	CNOT10
NKTR	ARMCX4	CASC4	CNOT7
NMRAL1	ARMCX6	CASD1	CNOT8
NOA1	ARNT2	CASK	CNTN3
NOXO1	ARNTL	CASKIN1	CNTNAP1
NPDC1	ARNTL2	CASP3	COBL
NPM1	ARPC1A	CASP8	COBLL1
NPM1P39	ARPC4-TTLL3	CASP8AP2	COCH
NPTXR	ARPC5	CASQ2	COG3
NR1D2	ARPP19	CAV1	COG6
NR2F1	ARPP21	CBFB	COIL
NR2F1-AS1	ARRDC1	CBL	COL14A1
NRARP	ARRDC4	CBR3	COL4A5
NRM	ARSB	CBWD1	COLEC12
NRTN	ARSK	CBX3	COMMD5
NSD2	ART3	CBX4	COMMD8
NT5C	ARV1	CBX8	COPZ1
NT5DC1	ARX	CCAR1	COQ10B
NT5DC2	ASAH1	CCDC106	COQ7
NTHL1	ASAP1	CCDC112	CP
NTSR1	ASAP2	CCDC113	CPE
NUCKS1	ASB11	CCDC117	CPEB3
NUDCD2	ASB13	CCDC12	CPEB4
NUDT2	ASB5	CCDC121	CPNE4
NUDT3	ASB7	CCDC125	CPNE8
NUP210	ASCC2	CCDC126	CPSF2
NXPH4	ASCC3	CCDC14	CPSF6
OBSL1	ASCL1	CCDC25	CRB1
OGDHL	ASCL4	CCDC43	CRBN
OGG1	ASF1A	CCDC47	CREB1
OR51I1	ASF1B	CCDC50	CREB3L2
OTUD5	ASH1L	CCDC57	CREB5
OXNAD1	ASPH	CCDC6	CREBBP
P4HTM	ASPHD2	CCDC61	CREBL2
PABPC1	ASPM	CCDC77	CREBZF
PAFAH1B3	ASPN	CCDC80	CRIM1
PAICS	ASTN1	CCDC82	CRLS1
PALM	ASTN2	CCDC91	CRY1
PALM3	ASXL1	CCNA2	CSNK1D
PAQR4	ASXL2	CCNB2	CSNK1E
PAQR6	ASXL3	CCNC	CSNK1G3
PARD6A	ATAD1	CCND1	CSNK2A1
PARN	ATAD2	CCND2	CSNK2A2
PCLO	ATAD2B	CCNE2	CSPP1
PDCD7	ATAD5	CCNF	CSTF2
PDE4B	ATF1	CCNG1	CTCF
PDXP	ATF2	CCNG2	CTDSP1
PEBP1	ATF4	CCNH	CTGF
PES1	ATF6	CCNI	CTNND1
PEX11G	ATF7	CCNL1	CTTNBP2
PGLS	ATF7IP	CCNT2	CUL1
PGM1	ATG10	CCNY	CUL2
PHLDB2	ATG12	CCNYL1	CUL3
PIGF	ATG14	CCR5	CUL5
PIGX	ATG16L1	CCR6	CUTC
PIP4K2B	ATG2B	CCT3	CUX1
PITPNA-AS1	ATG3	CD2AP	CXADR
PKIG	ATG7	CD46	CYLD
PLLP	ATL1	CD47	CYP20A1
PMM1	ATL2	CD55	CYP26A1
PMS1	ATL3	CD58	CYP2B6
PNKD	ATM	CD69	CYP2U1
POLR2J3	ATMIN	CD74	CYR61
POMZP3	ATOH7	CD9	CYTH1
PPCDC	ATOH8	CDC123	CYTH3
PPIP5K1	ATP10D	CDC14A	DAB2
PPP3CA	ATP11A	CDC14B	DACH1
PPP6R2	ATP11B	CDC23	DAGLA
PRC1	ATP11C	CDC25A	DBF4
PRKAG1	ATP13A2	CDC27	DBR1
PRKDC	ATP13A3	CDC42EP3	DBT
PRMT2	ATP1B1	CDC42SE2	DCBLD1
PRPF31	ATP1B3	CDC7	DCC
PRPF6	ATP1B4	CDCA4	DCK
PRR7	ATP2A1	CDCA7	DCLRE1C
PRRT1	ATP2A2	CDCA8	DCP1A
PSIP1	ATP2B1	CDH18	DCP2
PSMC1P1	ATP2B2	CDH2	DCT
PSMC3IP	ATP2B4	CDH23	DCUN1D1
PSMD1	ATP2C1	CDH3	DCUN1D4
PTP4A3	ATP5C1	CDH7	DDHD1
PTPA	ATP5G3	CDK2	DDHD2
PTPN18	ATP5S	CDK2AP1	DDIT3
PYCR1	ATP6AP1	CDK6	DDX10
PYCR3	ATP6AP2	CDK7	DDX17
PYGL	ATP6V0A2	CDKAL1	DDX18
QTRT1	ATP6V1A	CDKN1A	DDX21
RAB3A	ATP6V1B1	CDKN1B	DDX3X
RAB3GAP1	ATP6V1B2	CDKN2AIP	DDX50
RABL6	ATP6V1C1	CDON	DDX55
RAC3	ATP7A	CDR2	DDX59
RAD50	ATP7B	CDS2	DDX6
RAD54L	ATP8A1	CEBPB	DEAF1
RAP2B	ATP8A2	CEBPD	DEK
RASSF3	ATP8B1	CENPA	DENND4B
RBBP4	ATP8B4	CENPE	DENND4C
RBBP8	ATP9A	CENPJ	DEPDC1B
RBM15B	ATP9B	CENPN	DEPDC5
RBM34	ATPIF1	CENPO	DEPDC7
RDX	ATR	CEP120	DGAT1
REEP6	ATRN	CEP135	DGKD
RFC2	ATRNL1	CEP170	DGKE
RFLNB	ATRX	CEP290	DHX32
RGS2	ATXN1	CEP350	DHX33
RILPL1	ATXN1L	CEP55	DHX35
RNASEH2A	ATXN2	CEP57	DHX36
RNF166	ATXN3	CEP70	DIAPH1
RNF20	ATXN7	CEP76	DIAPH3
RNF7	ATXN7L1	CERK	DICER1
RNFT2	ATXN7L3	CETN3	DIO3
RPA3	ATXN7L3B	CFD	DIP2B
RPL12P17	AURKA	CFDP1	DIP2C
RPL12P41	AUTS2	CGGBP1	DIS3
RPL21P75	AVPR1A	CGN	DISC1
RPL29P11	AXIN1	CHAC2	DKK1
RPL34	AXIN2	CHCHD3	DLAT
RPL37P23	AZGP1	CHCHD4	DLC1
RPL41P2	AZI2	CHD1	DLD
RPL5P12	AZIN1	CHD2	DLG1
RPL5P34	B3GALT1	CHD7	DLGAP4
RPL5P4	B3GALT2	CHD8	DLGAP5
RPL9P7	B3GALT5	CHD9	DLL3
RPP25L	B3GAT1	CHEK1	DLL4
RPS15AP30	B3GNT5	CHEK2	DLX2
RPS24P8	B4GALT1	CHERP	DMXL1
RPSAP12	B4GALT2	CHIC1	DNAH11
RRM1	B4GALT4	CHIC2	DNAJA2
RUVBL1	B4GALT5	CHM	DNAJA3
S100A4	B4GALT6	CHMP1A	DNAJB1
SAC3D1	B9D2	CHMP2B	DNAJB14
SAE1	BAALC	CHMP4C	DNAJB5
SAPCD2	BAAT	CHMP7	DNAJC19
SCLY	BACE1	CHN2	DNAJC2
SCNN1A	BACH1	CHPF	DNAJC24
SEPHS2	BACH2	CHRAC1	DNAJC5
SERPINB6	BAD	CHST9	DNMBP
SERTAD2	BAG1	CHSY1	DOCK1
SFXN2	BAG4	CHSY3	DOCK2
SH3GLB2	BAG5	CHUK	DOCK4
SH3RF1	BAGE	CISD1	DOCK9
SHMT1	BAHCC1	CISD2	DONSON
SIVA1	BAHD1	CISD3	DOPEY1
SKA1	BAIAP2	CITED2	DPY19L1
SLC22A31	BAIAP2L1	CKAP2L	DPY19L2P1
SLC25A1	BAP1	CKAP5	DPY19L2P2
SLC25A11	BARHL1	CKS2	DPY19L4
SLC25A6	BAZ1A	CLASP1	DSC2
SLC27A1	BAZ2B	CLASP2	DSC3
SLC27A5	BBC3	CLCC1	DSE
SLC2A4RG	BBOX1	CLCN3	DSG2
SLC37A4	BBS10	CLDN1	DST
SLC39A11	BBS12	CLDND1	DTWD1
SLC9A3R2	BBS2	CLEC16A	DTWD2
SLC9B2	BBS7	CLIC2	DUSP1
SLX4IP	BBS9	CLIC4	DUSP11
SMAD6	BBX	CLINT1	DUSP16
SMC5	BCAP29	CLIP1	DUSP18
SMIM19	BCAR1	CLIP4	DUSP6
SMYD3	BCAR3	CLK1	DUSP8
SNHG15	BCAR4	CLK2	DYNC1I2
SNHG17	BCAS1	CLK4	DYNC1LI2
SNHG9	BCAS3	CLPTM1	DYNLT3
SNX22	BCAT1	CLSTN1	DYRK1A
SOX12	BCCIP	CLSTN3	DYRK2
SOX4	BCKDHB	CMIP	DZIP1
SPATS2	BCL10	CMTM3	E2F3
SPC24	BCL11A	CMTM4	E2F5
SPECC1L	BCL11B	CMTM6	E2F6
SPEN	BCL2	CNBP	E2F8
SPOP	BCL2L1	CNNM1	EAPP
SRD5A3	BCL2L11	CNOT1	EBAG9
SREK1	BCL2L13	CNOT10	EBF3
SSU72	BCL2L15	CNOT4	EDA
ST13	BCL2L2-PABPN1	CNOT7	EDEM1
ST13P3	BCL3	CNOT8	EDEM3
ST3GAL4	BCL6	CNTN3	EDIL3
STK11	BCL6B	CNTNAP1	EDNRA
STK16	BCL9L	COBL	EEA1
STK39	BCLAF1	COBLL1	EED
STX2	BCOR	COCH	EEF2
STYXL1	BCORL1	COG3	EFNA1
SUCLG2	BDH2	COG5	EFNA5
SULT1A1	BDNF	COG6	EFNB1
SUMF1	BDP1	COIL	EFNB2
SUMF2	BEND2	COL14A1	EFR3A
SUPT16H	BEND4	COL1A1	EGLN1
SUPT16HP1	BEND6	COL4A1	EGR1
SURF6	BEND7	COL4A5	EIF1AX
SUSD2	BEX4	COLEC12	EIF2AK3
SYNE4	BFAR	COMMD5	EIF3F
TADA2A	BHLHB9	COMMD8	EIF3J
TAF15	BHLHE22	COPB1	EIF4A3
TBC1D22A	BHLHE40	COPE	EIF4E
TBCA	BHLHE41	COPS2	EIF4ENIF1
TCEAL4	BICD1	COPS5	EIF4G2
TCERG1	BIVM	COPS8	EIF4G3
TCF7L2	BLCAP	COPZ1	EIF5
TCTA	BLM	COQ10A	EIF5A2
TEF	BLOC1S2	COQ10B	ELAVL1
TENT4A	BLZF1	COQ6	ELF1
TERT	BMF	COQ7	ELF2
TFAP4	BMP2	CORO1C	ELF3
THAP9-AS1	BMP3	CP	ELK1
THEM6	BMP6	CPE	ELK4
THOC7	BMP7	CPEB2	ELL2
THOP1	BMP8A	CPEB3	ELMOD2
THYN1	BMP8B	CPEB4	ELP4
TIAM1	BMPER	CPNE1	EML4
TIMELESS	BMPR1A	CPNE3	EMP1
TLCD1	BMPR1B	CPNE4	EMP2
TMCO4	BMPR2	CPNE8	EMX2
TMED8	BMS1	CPOX	EN1
TMEM129	BNC1	CPSF2	EN2
TMEM132A	BNC2	CPSF6	ENAH
TMEM187	BNIP2	CR1L	ENSA
TMEM198B	BNIP3L	CRB1	ENTPD5
TMEM200B	BOC	CRBN	ENTPD7
TMEM203	BOLL	CREB1	ENY2
TMEM209	BPTF	CREB3L2	EPB41L4B
TMEM238	BRCA2	CREB5	EPC1
TMEM97	BRD1	CREBBP	EPC2
TMOD2	BRD2	CREBL2	EPHB4
TNRC6B	BRD3	CREBZF	EPHX2
TP53	BRD4	CREM	EPS15
TPM3	BRD7	CRIM1	ERBB4
TRAF3IP1	BRF1	CRLS1	ERC1
TRAIP	BRF2	CRY1	ERCC3
TRAPPC6A	BRIP1	CSDE1	ERCC4
TRIAP1	BRIX1	CSGALNACT2	ERRFI1
TRIB1	BRMS1L	CSNK1A1	ESCO2
TRIM47	BRPF1	CSNK1D	ESD
TRIM52-AS1	BRPF3	CSNK1E	ESF1
TRIM65	BRSK1	CSNK1G2	ETFDH
TRIM66	BRWD1	CSNK1G3	ETNK1
TRIM69	BRWD3	CSNK2A1	ETS2
TRIM7	BSN	CSNK2A2	ETV3
TSEN34	BST1	CSPP1	ETV4
TSPAN1	BTAF1	CSTF1	EVI5
TSTD1	BTBD1	CSTF2	EWSR1
TTC3	BTBD11	CTBP2	EXO1
TYW1	BTBD18	CTCF	EXOC5
UACA	BTBD2	CTDSP1	EXOC6
UBE3C	BTBD3	CTGF	EXOC6B
UNC45A	BTBD7	CTH	EXOC8
UNC93B1	BTBD9	CTNNA1	EXOSC10
UNC93B6	BTC	CTNNAL1	EXOSC9
UPF2	BTF3	CTNND1	EYA1
UPF3B	BTF3L4	CTTNBP2	EYA4
UQCC2	BTG1	CUL1	EZR
UQCC3	BTG4	CUL2	F2R
UQCR10	BTK	CUL3	F2RL1
USP48	BTLA	CUL5	F3
VARS2	BTN2A2	CUTC	FAM103A1
VEGFB	BTNL8	CUX1	FAM104A
VIM	BTRC	CXADR	FAM107B
VPS26A	BUB1	CXCR4	FAM120A
VPS39	BUB1B	CYB5R3	FAM122A
VPS52	BUB3	CYLD	FAM126A
VSIG10	BZRAP1	CYP20A1	FAM126B
WDR34	BZW1	CYP26A1	FAM129A
WDR54	BZW2	CYP2A7	FAM133B
WNT16	C10orf105	CYP2B6	FAM134A
XPA	C10orf113	CYP2U1	FAM135A
XRCC1	C10orf128	CYP3A4	FAM149A
YBX1P6	C10orf131	CYR61	FAM168B
YDJC	C10orf2	CYTH1	FAM172A
ZC3H13	C10orf53	CYTH3	FAM177A1
ZC3H6	C10orf55	DAB1	FAM179A
ZDHHC12	C10orf88	DAB2	FAM19A5
ZDHHC4	C11orf57	DACH1	FAM3C
ZMYND11	C11orf84	DAG1	FAM46A
ZNF182	C11orf87	DAGLA	FAM53C
ZNF397	C11orf88	DARS	FAM60A
ZNF428	C11orf95	DAXX	FAM63B
ZNF627	C12orf29	DBF4	FAM64A
ZNF629	C12orf4	DBR1	FAM72B
ZNF76	C12orf50	DBT	FAM76B
ZP3	C12orf66	DCBLD1	FAM84A
	C14orf105	DCC	FAM86B1
	C14orf119	DCK	FAM96A
	C14orf132	DCLRE1C	FAR1
	C14orf2	DCP1A	FAS
	C14orf37	DCP2	FASTKD1
	C14orf39	DCT	FAT1
	C14orf79	DCTN4	FAT3
	C15orf40	DCTN6	FAT4
	C15orf48	DCUN1D1	FBN1
	C15orf54	DCUN1D4	FBN2
	C15orf57	DDHD1	FBRS
	C15orf61	DDHD2	FBXL14
	C16orf45	DDIT3	FBXL16
	C16orf52	DDX10	FBXL17
	C16orf70	DDX17	FBXO11
	C16orf87	DDX18	FBXO21
	C17orf51	DDX21	FBXO25
	C17orf58	DDX24	FBXO3
	C17orf67	DDX31	FBXO30
	C17orf75	DDX3X	FBXO32
	C17orf77	DDX50	FBXO33
	C17orf78	DDX55	FBXO34
	C18orf21	DDX59	FBXO36
	C18orf25	DDX6	FBXO38
	C18orf54	DEAF1	FBXO45
	C19orf12	DEK	FBXO5
	C19orf43	DENND1C	FBXO8
	C19orf45	DENND4B	FBXW11
	C1D	DENND4C	FBXW2
	C1orf101	DENND5A	FCHO2
	C1orf109	DEPDC1B	FEM1C
	C1orf112	DEPDC5	FERMT2
	C1orf115	DEPDC7	FEZF1
	C1orf116	DFNA5	FGB
	C1orf198	DGAT1	FGD4
	C1orf21	DGKD	FGF13
	C1orf216	DGKE	FGF2
	C1orf226	DHRSX	FGF5
	C1orf52	DHX15	FGF9
	C1orf74	DHX32	FGFR1
	C1orf95	DHX33	FGFR1OP2
	C1QTNF6	DHX35	FGFR2
	C1QTNF7	DHX36	FGR
	C1RL	DIAPH1	FHDC1
	C1S	DIAPH3	FHL1
	C20orf197	DICER1	FIGN
	C21orf59	DIO3	FJX1
	C21orf91	DIP2B	FKBP5
	C2CD4C	DIP2C	FLNB
	C2orf42	DIS3	FLT1
	C2orf47	DIS3L2	FLT3LG
	C2orf49	DISC1	FLVCR1
	C2orf54	DKK1	FMN2
	C2orf69	DLAT	FMO1
	C2orf70	DLC1	FMR1
	C2orf78	DLD	FN1
	C2orf83	DLG1	FNBP1
	C3orf33	DLGAP4	FNBP1L
	C3orf35	DLGAP5	FNBP4
	C3orf52	DLL3	FNDC3A
	C3orf58	DLL4	FNDC3B
	C3orf67	DLX2	FNIP1
	C3orf70	DMXL1	FOXA1
	C4orf33	DNAH11	FOXF1
	C4orf46	DNAJA2	FOXF2
	C5orf15	DNAJA3	FOXK2
	C5orf22	DNAJB1	FOXM1
	C5orf24	DNAJB14	FOXN2
	C5orf28	DNAJB5	FOXN3
	C5orf30	DNAJC18	FOXO1
	C5orf34	DNAJC19	FOXO3
	C5orf42	DNAJC2	FOXP1
	C5orf56	DNAJC24	FOXP2
	C6orf1	DNAJC5	FPGT
	C6orf106	DNMBP	FRMD4B
	C6orf120	DNMT1	FRMD6
	C6orf132	DNMT3A	FRMPD4
	C6orf136	DNPEP	FRS2
	C6orf222	DOCK1	FSD1L
	C6orf58	DOCK2	FST
	C6orf62	DOCK4	FSTL1
	C6orf89	DOCK9	FUNDC1
	C7orf31	DOK2	FYN
	C7orf33	DONSON	FYTTD1
	C7orf57	DOPEY1	FZD3
	C7orf60	DPH3	FZD5
	C7orf65	DPY19L1	FZD6
	C8orf34	DPY19L2P1	FZD7
	C8orf46	DPY19L2P2	FZD8
	C8orf86	DPY19L4	GAB1
	C9orf114	DSC2	GABARAPL2
	C9orf152	DSC3	GABRB2
	C9orf170	DSE	GAD1
	C9orf47	DSG2	GALNT1
	C9orf66	DST	GAN
	C9orf78	DTWD1	GAS1
	C9orf84	DTWD2	GAS2L1
	C9orf85	DUOX1	GAS6
	C9orf91	DUSP1	GATA2
	CA1	DUSP11	GATA3
	CA10	DUSP16	GATA6
	CA13	DUSP18	GATAD1
	CA14	DUSP6	GBX2
	CA5B	DUSP8	GCA
	CA8	DYNC1I2	GCLC
	CAB39	DYNC1LI1	GCLM
	CAB39L	DYNC1LI2	GFPT1
	CABP1	DYNLT3	GIGYF1
	CABP4	DYRK1A	GIGYF2
	CABP7	DYRK2	GINS1
	CABYR	DYRK4	GIT1
	CACNA1B	DZIP1	GIT2
	CACNA1C	E2F3	GK5
	CACNA1E	E2F5	GKAP1
	CACNA1G	E2F6	GLCCI1
	CACNA2D1	E2F7	GLCE
	CACNA2D3	E2F8	GLI2
	CACNA2D4	EAPP	GLI3
	CACNB2	EBAG9	GLS
	CACNB4	EBF3	GM2A
	CACNG1	ECHDC2	GMCL1
	CACNG2	ECHS1	GNA13
	CACNG6	EDA	GNAI1
	CACNG7	EDEM1	GNAL
	CACNG8	EDEM3	GNB5
	CADM1	EDIL3	GNE
	CADM2	EDNRA	GNG10
	CADPS	EEA1	GNPDA2
	CADPS2	EED	GNPNAT1
	CAGE1	EEF1A2	GNPTAB
	CALB1	EEF2	GOLGA1
	CALCA	EFCAB9	GOLM1
	CALCB	EFNA1	GOLPH3
	CALCOCO2	EFNA5	GOLT1B
	CALCR	EFNB1	GOPC
	CALCRL	EFNB2	GORASP2
	CALD1	EFR3A	GPATCH2
	CALM1	EGFR	GPATCH8
	CALM2	EGLN1	GPM6B
	CALM3	EGR1	GPN3
	CALML4	EHMT1	GPR1
	CALN1	EI24	GPR161
	CALU	EIF1AX	GPRC5A
	CAMK1D	EIF2A	GPRIN3
	CAMK2A	EIF2AK3	GRAMD1B
	CAMK2D	EIF2B5	GRAMD1C
	CAMK2N1	EIF2S2	GRAMD4
	CAMK4	EIF2S3	GRB10
	CAMKK2	EIF3D	GRB2
	CAMKV	EIF3F	GRHL1
	CAMSAP1	EIF3J	GRIA3
	CAMTA1	EIF4A3	GRID1
	CAMTA2	EIF4E	GRIK2
	CAND1	EIF4ENIF1	GRTP1
	CANX	EIF4G2	GSK3A
	CAP1	EIF4G3	GSK3B
	CAP2	EIF5	GSPT1
	CAPN10	EIF5A2	GSTCD
	CAPN2	ELAVL1	GSTM3
	CAPN7	ELAVL4	GTF2A1
	CAPRIN1	ELF1	GTF2B
	CAPRIN2	ELF2	GTF3C3
	CAPS2	ELF3	GTPBP10
	CAPZA2	ELF4	GTPBP2
	CARD14	ELF5	GTSE1
	CARD8	ELK1	GUCY1A3
	CASC1	ELK4	GUCY1B3
	CASC4	ELL2	H1F0
	CASC5	ELMOD2	HBP1
	CASD1	ELP4	HCCS
	CASK	EML2	HCFC1
	CASKIN2	EML4	HCG11
	CASP10	EMP1	HDAC4
	CASP3	EMP2	HDAC9
	CASP4	EMX2	HEATR3
	CASP9	EN1	HEATR5A
	CASQ2	EN2	HEATR5B
	CASR	ENAH	HEBP2
	CAST	ENDOD1	HECA
	CASZ1	ENSA	HECTD1
	CAV1	ENTPD5	HECTD2
	CAV2	ENTPD7	HELZ
	CBFA2T2	ENY2	HERC3
	CBFA2T3	EP300	HERC4
	CBFB	EPB41L3	HERPUD1
	CBL	EPB41L4B	HESX1
	CBR4	EPC1	HHEX
	CBWD1	EPC2	HIF1A
	CBWD2	EPHB4	HIPK2
	CBWD3	EPHX2	HK2
	CBWD6	EPOR	HLX
	CBX3	EPRS	HMGA2
	CBX4	EPS15	HMGB1
	CBX5	ERBB4	HMGB2
	CBX8	ERC1	HMGB3
	CC2D1B	ERCC2	HMGCR
	CC2D2B	ERCC3	HMX2
	CCAR1	ERCC4	HNMT
	CCBL2	ERH	HNRNPA0
	CCDC102B	ERLIN1	HNRNPA1
	CCDC107	ERN1	HNRNPA2B1
	CCDC109B	ERRFI1	HNRNPA3P1
	CCDC110	ESCO2	HNRNPC
	CCDC117	ESD	HNRNPH3
	CCDC12	ESF1	HNRNPR
	CCDC120	ETAA1	HNRNPU
	CCDC125	ETFDH	HNRNPUL2
	CCDC126	ETNK1	HOMER1
	CCDC14	ETS2	HOXA10
	CCDC141	ETV3	HOXA11
	CCDC144A	ETV4	HOXA13
	CCDC144NL	EVI5	HOXA9
	CCDC149	EWSR1	HOXC11
	CCDC15	EXO1	HOXC13
	CCDC150	EXOC1	HOXC9
	CCDC158	EXOC2	HP1BP3
	CCDC163P	EXOC5	HS6ST2
	CCDC25	EXOC6	HSD17B12
	CCDC30	EXOC6B	HSD17B4
	CCDC36	EXOC8	HSF2
	CCDC43	EXOSC10	HSPA12A
	CCDC50	EXOSC9	HSPA13
	CCDC54	EYA1	HSPA14
	CCDC6	EYA4	HSPBAP1
	CCDC61	EZR	HSPD1
	CCDC62	F11R	HSPH1
	CCDC64	F13A1	HTR2A
	CCDC66	F2R	HTT
	CCDC68	F2RL1	IARS2
	CCDC73	F3	ICA1
	CCDC77	FAM101B	ICK
	CCDC82	FAM103A1	ID2
	CCDC85A	FAM104A	IDH3A
	CCDC85C	FAM107B	IDI1
	CCDC86	FAM117B	IER3IP1
	CCDC88A	FAM120A	IER5
	CCDC89	FAM122A	IFFO2
	CCDC97	FAM126A	IFI16
	CCIN	FAM126B	IFIT1
	CCL8	FAM127B	IFIT5
	CCNA2	FAM129A	IFNAR1
	CCNB1	FAM133B	IFNGR1
	CCNB2	FAM134A	IFNGR2
	CCND2	FAM135A	IFRD1
	CCNDBP1	FAM149A	IFT80
	CCNE2	FAM155A	IGF2BP2
	CCNG2	FAM168B	IGF2R
	CCNH	FAM172A	IKZF4
	CCNK	FAM175B	IL15
	CCNL1	FAM177A1	IL1R1
	CCNL2	FAM179A	IL1RAP
	CCNO	FAM19A5	ILKAP
	CCNT2	FAM21C	IMMP1L
	CCNY	FAM3C	IMPA1
	CCPG1	FAM46A	IMPAD1
	CCR1	FAM53C	ING3
	CCR5	FAM60A	INO80D
	CCR6	FAM63B	INPP4B
	CCRL2	FAM64A	INSIG1
	CCT6B	FAM65A	INSIG2
	CCT7	FAM72B	INSM1
	CCZ1	FAM76B	INSR
	CD109	FAM78B	INTS10
	CD163	FAM84A	INTS2
	CD164	FAM86B1	INTS6
	CD1D	FAM96A	INTS7
	CD200R1	FAM98A	IPMK
	CD209	FAM98B	IPO7
	CD226	FAR1	IQUB
	CD24	FARP1	IRAK1BP1
	CD247	FAS	IREB2
	CD28	FASTKD1	IRF1
	CD2AP	FASTKD3	IRF2
	CD300LG	FASTKD5	IRF2BP1
	CD302	FAT1	IRF2BP2
	CD34	FAT3	IRF6
	CD36	FAT4	IRS1
	CD37	FBN1	IRS2
	CD40	FBN2	IRX3
	CD44	FBRS	IRX5
	CD46	FBXL14	ISCU
	CD47	FBXL16	ITCH
	CD58	FBXL17	ITFG1
	CD59	FBXL3	ITGA2
	CD81	FBXO10	ITGA4
	CD82	FBXO11	ITGA6
	CD86	FBXO18	ITGB3BP
	CD8A	FBXO21	ITM2C
	CD9	FBXO25	ITPR1
	CD93	FBXO3	ITSN2
	CDC123	FBXO30	IVNS1ABP
	CDC14A	FBXO32	JAG1
	CDC14B	FBXO33	JAG2
	CDC14C	FBXO34	JAK2
	CDC16	FBXO36	JAZF1
	CDC27	FBXO38	JMJD1C
	CDC37L1	FBXO45	JRKL
	CDC40	FBXO5	JUN
	CDC42	FBXO8	KALRN
	CDC42BPA	FBXW11	KATNAL1
	CDC42BPB	FBXW2	KBTBD2
	CDC42EP3	FCER1A	KBTBD8
	CDC42SE2	FCHO2	KCMF1
	CDC5L	FDX1	KCNAB2
	CDC6	FEM1B	KCNG3
	CDC7	FEM1C	KCNJ4
	CDC73	FERMT2	KCNK1
	CDCA2	FEZF1	KCNQ5
	CDCA5	FGB	KCNT2
	CDCA7	FGD4	KCTD12
	CDCA8	FGF13	KCTD3
	CDH1	FGF2	KDELC2
	CDH10	FGF5	KEAP1
	CDH11	FGF9	KIAA0391
	CDH13	FGFR1	KIAA0907
	CDH17	FGFR1OP2	KIAA1109
	CDH18	FGFR2	KIAA1143
	CDH2	FGR	KIAA1147
	CDH22	FH	KIAA1217
	CDH26	FHDC1	KIAA1429
	CDH4	FHL1	KIAA1468
	CDH5	FHOD3	KIAA1586
	CDH6	FIGN	KIAA1715
	CDH7	FILIP1L	KIAA1804
	CDH8	FJX1	KIAA2026
	CDH9	FKBP3	KIF11
	CDK1	FKBP4	KIF16B
	CDK11A	FKBP5	KIF18A
	CDK12	FKBP7	KIF1B
	CDK13	FLNA	KIF20B
	CDK14	FLNB	KIF21A
	CDK17	FLT1	KIF3A
	CDK19	FLT3LG	KIT
	CDK5R1	FLVCR1	KITLG
	CDK5RAP1	FMN2	KLC1
	CDK5RAP2	FMO1	KLF10
	CDK6	FMO4	KLF12
	CDK7	FMR1	KLF13
	CDK8	FN1	KLF15
	CDKL1	FNBP1	KLF3
	CDKL2	FNBP1L	KLF4
	CDKN1A	FNBP4	KLF5
	CDKN1B	FNDC3A	KLF9
	CDKN1C	FNDC3B	KLHDC10
	CDKN2AIP	FNIP1	KLHL13
	CDKN2B	FOSL2	KLHL20
	CDKN3	FOXA1	KLHL23
	CDO1	FOXF1	KLHL28
	CDON	FOXF2	KLHL29
	CDR2	FOXK2	KLHL8
	CDS1	FOXM1	KPNA1
	CDS2	FOXN2	KPNA2
	CDX1	FOXN3	KPNA4
	CDYL2	FOXO1	KRIT1
	CEACAM7	FOXO3	KRR1
	CEBPB	FOXP1	KSR2
	CEBPD	FOXP2	L1CAM
	CEBPZ	FOXP4	L2HGDH
	CECR2	FOXRED1	L3MBTL3
	CELF1	FPGT	L3MBTL4
	CELF2	FRMD4B	LACTB2
	CELF3	FRMD6	LAMP2
	CELF4	FRMPD2	LANCL1
	CELF5	FRMPD4	LARP4
	CELF6	FRS2	LBR
	CELSR1	FSD1L	LCOR
	CELSR2	FST	LDOC1L
	CELSR3	FSTL1	LEMD3
	CENPA	FTH1	LENG8
	CENPBD1	FUNDC1	LEPROTL1
	CENPE	FUT11	LGR4
	CENPF	FXR2	LGR5
	CENPJ	FYN	LHX2
	CENPK	FYTTD1	LIFR
	CENPN	FZD3	LIG4
	CEP120	FZD5	LIMCH1
	CEP135	FZD6	LIN54
	CEP170	FZD7	LIN7C
	CEP192	FZD8	LIN9
	CEP290	GAB1	LIX1L
	CEP350	GABARAPL2	LMBR1
	CEP63	GABPA	LMBRD1
	CEP68	GABPB2	LMNB2
	CEP70	GABRB2	LMX1B
	CEP76	GAD1	LONP2
	CEP78	GADD45A	LONRF1
	CEPT1	GALNT1	LONRF2
	CERK	GAN	LONRF3
	CERKL	GARNL3	LPGAT1
	CES3	GART	LPP
	CFHR5	GAS1	LRIG2
	CFLAR	GAS2L1	LRP12
	CGGBP1	GAS2L3	LRP2
	CGNL1	GAS6	LRP5
	CH25H	GATA2	LRP8
	CHCHD1	GATA3	LRPPRC
	CHCHD7	GATA6	LRRC57
	CHD1	GATAD1	LRRC58
	CHD2	GBGT1	LRRFIP2
	CHD3	GBX2	LRRTM4
	CHD6	GCA	LSM1
	CHD7	GCLC	LSM14A
	CHD9	GCLM	LSM14B
	CHEK1	GCSH	LSM5
	CHEK2	GDE1	LTV1
	CHFR	GDI1	LUC7L
	CHIC1	GEN1	LUC7L2
	CHL1	GFM1	LYN
	CHM	GFPT1	LYPD6
	CHMP1A	GIGYF1	LYPLAL1
	CHMP1B	GIGYF2	LYRM7
	CHMP2B	GINS1	LYSMD3
	CHMP4C	GINS3	LZTFL1
	CHMP7	GIT1	LZTS2
	CHN2	GIT2	MADD
	CHODL	GK5	MAFG
	CHORDC1	GKAP1	MAK16
	CHP2	GLCCI1	MAL2
	CHPT1	GLCE	MALT1
	CHRAC1	GLI2	MAML1
	CHRD	GLI3	MAML2
	CHRM5	GLO1	MAML3
	CHRNB4	GLRX5	MAN1A1
	CHST1	GLS	MANBA
	CHST11	GLUL	MANEA
	CHST15	GM2A	MAP1B
	CHST3	GMCL1	MAP1LC3B
	CHST9	GMFB	MAP3K1
	CHSY1	GNA13	MAP3K4
	CHSY3	GNAI1	MAP4K3
	CHUK	GNAL	MAP7D3
	CHURC1	GNAQ	MAP9
	CIC	GNAS	MAPK6
	CILP	GNB5	MAPKAP1
	CISD1	GNE	MAPKAPK5
	CISD2	GNG10	MAPRE2
	CISD3	GNPDA2	MARCKS
	CIT	GNPNAT1	MARK4
	CITED1	GNPTAB	MASTL
	CKAP2	GOLGA1	MAT2B
	CKAP2L	GOLGA5	MAX
	CKAP5	GOLIM4	MBD5
	CKS2	GOLM1	MBIP
	CLASP1	GOLPH3	MBNL1
	CLASP2	GOLPH3L	MBNL2
	CLCA4	GOLT1B	MBNL3
	CLCN2	GOPC	MBTD1
	CLCN3	GORASP2	MCEE
	CLCN5	GPATCH2	MCM3
	CLCN6	GPATCH8	MCM4
	CLDN1	GPD2	MCM8
	CLDN10	GPHN	MCPH1
	CLDN11	GPM6B	MCRS1
	CLDN12	GPN3	MDGA2
	CLDN23	GPR1	MDM1
	CLDND1	GPR137	MDM2
	CLEC16A	GPR143	ME2
	CLEC1A	GPR161	MECP2
	CLEC2D	GPR89A	MED13
	CLEC3A	GPRC5A	MED13L
	CLEC4A	GPRIN3	MED14
	CLEC4D	GRAMD1B	MED17
	CLIC4	GRAMD1C	MED23
	CLINT1	GRAMD4	MED28
	CLIP1	GRB10	MED4
	CLIP4	GRB2	MEF2D
	CLK1	GRHL1	MEGF10
	CLK2	GRIA3	MEGF9
	CLK4	GRID1	MELK
	CLMN	GRIK2	MET
	CLN5	GRIK4	METTL10
	CLN8	GRTP1	METTL7A
	CLOCK	GSK3A	METTL8
	CLPTM1L	GSK3B	MFAP1
	CLPX	GSPT1	MFAP3
	CLSTN1	GSTCD	MFF
	CLSTN3	GSTK1	MFGE8
	CLTC	GSTM3	MFN1
	CLU	GTF2A1	MFSD8
	CLUL1	GTF2A1L	MGAT2
	CLVS1	GTF2B	MGAT3
	CLYBL	GTF2E1	MGAT4A
	CMIP	GTF3C3	MGEA5
	CMKLR1	GTF3C4	MIB1
	CMPK2	GTPBP1	MIER1
	CMTM4	GTPBP10	MIER3
	CMTM8	GTPBP2	MINA
	CNBP	GTSE1	MINPP1
	CNDP1	GUCY1A3	MIPOL1
	CNDP2	GUCY1B3	MITF
	CNGA1	GYG2	MKI67
	CNGA2	H1F0	MKL1
	CNGA3	H2AFV	MKL2
	CNIH3	H2AFY2	MKLN1
	CNIH4	H3F3B	MKNK2
	CNKSR2	HAGH	MLLT10
	CNKSR3	HAND1	MLLT4
	CNNM1	HAVCR2	MMAA
	CNNM4	HBEGF	MMGT1
	CNOT1	HBP1	MMP14
	CNOT10	HCCS	MMP15
	CNOT2	HCFC1	MN1
	CNOT6	HCG11	MND1
	CNOT6L	HDAC3	MNT
	CNOT7	HDAC4	MNX1
	CNOT8	HDAC9	MORC3
	CNPY3	HEATR3	MORF4L2
	CNR1	HEATR5A	MOSPD2
	CNRIP1	HEATR5B	MPHOSPH10
	CNTF	HEBP2	MPHOSPH6
	CNTFR	HECA	MPHOSPH8
	CNTLN	HECTD1	MPHOSPH9
	CNTN1	HECTD2	MPP5
	CNTN2	HELB	MPP6
	CNTN3	HELZ	MPP7
	CNTN4	HERC3	MPZL2
	CNTN5	HERC4	MREG
	CNTN6	HERPUD1	MRPL16
	CNTNAP1	HESX1	MRPL18
	CNTNAP2	HHEX	MRPL19
	CNTNAP3	HIBADH	MRPL22
	COBL	HIF1A	MRPL3
	COBLL1	HIPK2	MRPL30
	COCH	HIST1H2AC	MRPL34
	COG3	HK2	MRPL35
	COG6	HLA-DRB1	MRPL49
	COG7	HLX	MRPL50
	COIL	HMBS	MRPS18B
	COL12A1	HMGA2	MRPS22
	COL13A1	HMGB1	MRPS23
	COL14A1	HMGB2	MRPS26
	COL15A1	HMGB3	MRPS27
	COL17A1	HMGCR	MRPS35
	COL19A1	HMMR	MRPS36
	COL21A1	HMOX1	MSC
	COL24A1	HMX2	MSH2
	COL25A1	HNMT	MSI1
	COL28A1	HNRNPA0	MSI2
	COL3A1	HNRNPA1	MSX1
	COL4A3BP	HNRNPA2B1	MTA3
	COL4A4	HNRNPA3P1	MTAP
	COL4A5	HNRNPAB	MTDH
	COL4A6	HNRNPC	MTF1
	COL5A2	HNRNPF	MTF2
	COL5A3	HNRNPH3	MTM1
	COL6A3	HNRNPK	MTMR1
	COL6A4P1	HNRNPL	MTMR12
	COL6A5	HNRNPR	MTMR3
	COL8A1	HNRNPU	MTMR6
	COL9A2	HNRNPUL2	MTRF1
	COL9A3	HOMER1	MTUS1
	COLEC11	HORMAD1	MTX3
	COLEC12	HOXA10	MUC16
	COMMD10	HOXA11	MXD1
	COMMD2	HOXA13	MXI1
	COMMD3	HOXA5	MYB
	COMMD5	HOXA9	MYC
	COMMD6	HOXC11	MYCBP2
	COMMD7	HOXC13	MYO1E
	COMMD8	HOXC4	MYO5A
	COPS4	HOXC9	MYO5B
	COPZ1	HOXD13	MYO9A
	COQ10B	HP1BP3	MYSM1
	COQ7	HRC	MYT1
	COQ9	HRK	N4BP2L2
	CORIN	HS6ST2	NAALADL2
	CORO2A	HSD17B12	NAB1
	COX18	HSD17B4	NANP
	COX4I1	HSF2	NAP1L1
	COX6B2	HSF2BP	NAPB
	CP	HSPA12A	NASP
	CPD	HSPA13	NAT8L
	CPE	HSPA14	NBEA
	CPEB1	HSPA1B	NCAM1
	CPEB3	HSPBAP1	NCAPH
	CPEB4	HSPD1	NCBP2
	CPLX3	HSPH1	NCK1
	CPM	HTR2A	NCKAP1
	CPNE4	HTT	NCOA1
	CPNE8	HUNK	NCOA3
	CPPED1	IARS2	NCOA6
	CPSF2	ICA1	NCOA7
	CPSF4	ICK	NDC80
	CPSF6	ICMT	NDEL1
	CPT1A	ID2	NDFIP1
	CPZ	IDH3A	NDUFA12
	CR1	IDI1	NDUFS3
	CR2	IER3IP1	NDUFV2
	CRB1	IER5	NEK1
	CRBN	IFFO2	NEK2
	CREB1	IFI16	NEK3
	CREB3L1	IFI27	NEK7
	CREB3L2	IFIT1	NET1
	CREB5	IFIT5	NEXN
	CREBBP	IFNAR1	NF1
	CREBL2	IFNGR1	NFAT5
	CREBZF	IFNGR2	NFE2L2
	CREG2	IFRD1	NFIA
	CRELD2	IFT52	NFIL3
	CRHR2	IFT80	NFKBIA
	CRIM1	IGBP1	NFKBIZ
	CRISP2	IGF2BP2	NFS1
	CRISPLD1	IGF2R	NFYA
	CRISPLD2	IKBKG	NFYB
	CRKL	IKZF4	NGDN
	CRLF3	IL10RB	NHEJ1
	CRLS1	IL15	NHLRC2
	CRNKL1	IL16	NHS
	CROT	IL1R1	NIF3L1
	CRTAP	IL1RAP	NIN
	CRTC1	ILKAP	NINJ1
	CRTC3	IMMP1L	NIPA1
	CRX	IMMP2L	NIPA2
	CRY1	IMMT	NKRF
	CSAD	IMPA1	NKTR
	CSE1L	IMPAD1	NLGN1
	CSF2RB	ING3	NLGN2
	CSMD1	ING5	NLGN4X
	CSMD2	INO80D	NLK
	CSMD3	INPP4B	NOL8
	CSNK1D	INPP5E	NOLC1
	CSNK1E	INSIG1	NOTCH2
	CSNK1G3	INSIG2	NOV
	CSNK2A1	INSM1	NOVA1
	CSNK2A2	INSR	NPAT
	CSPG5	INTS10	NPC1
	CSPP1	INTS12	NPEPPS
	CSRNP3	INTS2	NPM3
	CSTF2	INTS5	NPNT
	CSTF3	INTS6	NPTX1
	CTAGE10P	INTS7	NR1D1
	CTAGE11P	INTS8	NR2C2
	CTAGE5	IPMK	NR2F2
	CTAGE9	IPO7	NR3C1
	CTBS	IQCE	NR4A1
	CTCF	IQGAP2	NR5A2
	CTDNEP1	IQSEC1	NRCAM
	CTDP1	IQUB	NRF1
	CTDSP1	IRAK1BP1	NRIP1
	CTDSPL	IREB2	NRP1
	CTDSPL2	IRF1	NRXN2
	CTF1	IRF2	NRXN3
	CTGF	IRF2BP1	NSL1
	CTHRC1	IRF2BP2	NT5DC3
	CTNNA3	IRF6	NTN4
	CTNNB1	IRS1	NUCKS1
	CTNNBIP1	IRS2	NUDCD1
	CTNND1	IRS4	NUDT10
	CTNND2	IRX3	NUDT12
	CTNS	IRX5	NUDT21
	CTPS2	ISCA1	NUDT3
	CTR9	ISCU	NUDT4
	CTSC	ITCH	NUF2
	CTSO	ITFG1	NUFIP2
	CTSZ	ITGA2	NUMB
	CTTNBP2	ITGA4	NUP153
	CTTNBP2NL	ITGA6	NUP160
	CTXN2	ITGB1	NUP54
	CTXN3	ITGB3BP	NUP93
	CUBN	ITM2C	NUP98
	CUL1	ITPR1	NUPL2
	CUL2	ITPRIPL2	NUS1
	CUL3	ITSN2	NUSAP1
	CUL4A	IVNS1ABP	NXF1
	CUL4B	IWS1	OAT
	CUL5	JAG1	OBFC1
	CUTC	JAG2	OCIAD1
	CUX1	JAK1	OGFRL1
	CWC22	JAK2	OIP5
	CWC27	JAZF1	ONECUT2
	CXADR	JMJD1C	OPA1
	CXCL10	JRKL	ORMDL1
	CXCL12	JUN	OSBPL10
	CXCL14	KALRN	OSBPL11
	CXCL5	KATNAL1	OSBPL6
	CXCR2	KBTBD2	OSBPL8
	CXCR2P1	KBTBD7	OSBPL9
	CXCR6	KBTBD8	OSGEPL1
	CXorf23	KCMF1	OSR2
	CXorf36	KCNAB2	OTUD1
	CXorf38	KCNG3	OTUD4
	CXorf56	KCNJ4	OTX1
	CXXC4	KCNK1	OXA1L
	CYB5B	KCNQ5	OXR1
	CYB5D2	KCNT2	PACRGL
	CYB5R4	KCTD12	PAFAH1B1
	CYCS	KCTD3	PAFAH1B2
	CYFIP1	KDELC2	PAG1
	CYLD	KEAP1	PAIP1
	CYP19A1	KHSRP	PAK1IP1
	CYP20A1	KIAA0319L	PAK2
	CYP24A1	KIAA0391	PALB2
	CYP26A1	KIAA0907	PALM2-AKAP2
	CYP26B1	KIAA1109	PAM
	CYP2B6	KIAA1143	PANK1
	CYP2R1	KIAA1147	PANK2
	CYP2U1	KIAA1217	PANK3
	CYP3A5	KIAA1429	PAPD4
	CYP4A11	KIAA1468	PAPD5
	CYP4A22	KIAA1586	PAPOLA
	CYP4F11	KIAA1715	PAPOLG
	CYP4F3	KIAA1804	PAQR3
	CYP51A1	KIAA2026	PARD3
	CYR61	KIF11	PARD3B
	CYSLTR1	KIF16B	PARD6B
	CYTH1	KIF18A	PARG
	CYTH3	KIF1B	PARP14
	CYTIP	KIF20B	PARP2
	CYYR1	KIF21A	PARP6
	DAAM1	KIF3A	PASK
	DAB2	KIF5A	PATL1
	DAB2IP	KIF5B	PAX9
	DACH1	KIF5C	PBX3
	DACH2	KIFC1	PCBP2
	DACT1	KIRREL3	PCDH11Y
	DACT3	KIT	PCDH7
	DAD1	KITLG	PCDH9
	DAGLA	KLC1	PCDHGA8
	DAPK1	KLF10	PCF11
	DAPP1	KLF12	PCGF3
	DBF4	KLF13	PCGF5
	DBF4B	KLF15	PCGF6
	DBIL5P	KLF3	PCM1
	DBR1	KLF4	PCNA
	DBT	KLF5	PCNP
	DBX2	KLF9	PCNT
	DCAF10	KLHDC10	PCSK2
	DCAF12	KLHDC9	PCSK5
	DCAF16	KLHL13	PDCD10
	DCAF17	KLHL15	PDCD2
	DCAF4	KLHL20	PDCD4
	DCAF4L1	KLHL23	PDCD7
	DCAF4L2	KLHL28	PDCL
	DCAF5	KLHL29	PDE10A
	DCAF7	KLHL36	PDE1A
	DCAF8L1	KLHL8	PDE5A
	DCBLD1	KLK7	PDE6D
	DCBLD2	KLRC4	PDE7A
	DCC	KLRK1	PDE7B
	DCDC5	KPNA1	PDE8B
	DCHS1	KPNA2	PDGFC
	DCK	KPNA4	PDGFRA
	DCLK1	KPNA5	PDHX
	DCLK2	KRIT1	PDIK1L
	DCLK3	KRR1	PDK4
	DCLRE1B	KSR2	PDLIM3
	DCLRE1C	L1CAM	PDLIM5
	DCP1A	L2HGDH	PDS5B
	DCP2	L3MBTL3	PDXK
	DCT	L3MBTL4	PDZD8
	DCTN5	LACTB2	PEA15
	DCUN1D1	LAMA4	PELI1
	DCUN1D3	LAMP2	PELI2
	DCUN1D4	LANCL1	PEX11B
	DCUN1D5	LARGE	PEX13
	DCX	LARP1	PEX14
	DDAH1	LARP4	PEX3
	DDHD1	LASP1	PFDN1
	DDHD2	LATS2	PFDN4
	DDIT3	LBR	PGAP1
	DDIT4L	LCOR	PGGT1B
	DDR1	LDOC1L	PGM2
	DDTL	LEMD3	PGRMC2
	DDX10	LENG8	PHACTR2
	DDX17	LEPROTL1	PHAX
	DDX18	LGR4	PHC2
	DDX20	LGR5	PHC3
	DDX21	LHFP	PHF10
	DDX23	LHX2	PHF12
	DDX3X	LIFR	PHF13
	DDX3Y	LIG4	PHF14
	DDX42	LIMCH1	PHF2
	DDX43	LIN28B	PHF20L1
	DDX46	LIN52	PHF23
	DDX5	LIN54	PHF3
	DDX50	LIN7C	PHF6
	DDX52	LIN9	PHLDA1
	DDX53	LIX1L	PIAS1
	DDX55	LMBR1	PIAS2
	DDX56	LMBRD1	PICALM
	DDX58	LMNB2	PIGM
	DDX59	LMX1B	PIK3AP1
	DDX6	LNX2	PIK3C2A
	DDX60	LOC728554	PIK3C3
	DDX60L	LONP2	PIK3CB
	DEAF1	LONRF1	PIM1
	DEGS1	LONRF2	PIM2
	DEK	LONRF3	PIP4K2A
	DENND1B	LPGAT1	PIP4K2B
	DENND3	LPP	PITPNB
	DENND4A	LRCH3	PITX2
	DENND4B	LRIG2	PJA2
	DENND4C	LRIG3	PKN2
	DENND5B	LRP12	PKNOX1
	DENR	LRP2	PLA2G12A
	DEPDC1	LRP5	PLA2R1
	DEPDC1B	LRP8	PLAG1
	DEPDC5	LRPPRC	PLEKHA1
	DEPDC7	LRRC57	PLEKHA5
	DEPTOR	LRRC58	PLEKHB2
	DERL1	LRRFIP2	PLK4
	DFFA	LRRTM4	PLS3
	DGAT1	LSM1	PLSCR1
	DGAT2	LSM14A	PLSCR4
	DGCR2	LSM14B	PLXNA2
	DGCR8	LSM5	PLXNA4
	DGKA	LSM6	PM20D2
	DGKB	LTBP3	PMAIP1
	DGKD	LTV1	PMP22
	DGKE	LUC7L	PMPCB
	DGKG	LUC7L2	PNMA1
	DGKH	LYAR	PNMA2
	DGKI	LYN	PNN
	DHDDS	LYPD6	PNPT1
	DHFR	LYPLAL1	PNRC1
	DHFRL1	LYRM7	PNRC2
	DHODH	LYSMD3	PODXL
	DHRS12	LZTFL1	POFUT1
	DHRS2	LZTS2	POGK
	DHRS4L2	MADD	POLD2
	DHTKD1	MAFG	POLH
	DHX32	MAGEF1	POLI
	DHX33	MAK16	POLK
	DHX35	MAL2	POLR1B
	DHX36	MALT1	POLR1C
	DHX57	MAML1	POLR2B
	DIAPH1	MAML2	POLR2F
	DIAPH2	MAML3	POLR2J
	DIAPH3	MAN1A1	POM121C
	DICER1	MAN1C1	POR
	DIDO1	MANBA	POU3F2
	DIO2	MANEA	POU4F2
	DIO3	MAP1B	PPA2
	DIP2A	MAP1LC3B	PPARGC1A
	DIP2B	MAP2K1	PPAT
	DIP2C	MAP3K1	PPFIA1
	DIRAS1	MAP3K4	PPFIBP1
	DIRAS2	MAP4K3	PPHLN1
	DIRC2	MAP7D3	PPIH
	DIS3	MAP9	PPM1A
	DIS3L	MAPK1	PPM1B
	DISC1	MAPK6	PPM1G
	DISP1	MAPKAP1	PPM1H
	DIXDC1	MAPKAPK2	PPM1K
	DKFZP434L187	MAPKAPK5	PPP1CB
	DKK1	MAPKBP1	PPP1CC
	DKK2	MAPRE1	PPP1R10
	DLAT	MAPRE2	PPP1R12A
	DLC1	MAPRE3	PPP1R14C
	DLD	MARCKS	PPP1R15B
	DLEU7	MARK4	PPP1R1C
	DLG1	MAST1	PPP1R3C
	DLG2	MASTL	PPP1R9B
	DLG3	MAT2B	PPP2CA
	DLGAP1	MATN2	PPP2R1B
	DLGAP2	MAX	PPP2R2A
	DLGAP4	MBD5	PPP2R2C
	DLGAP5	MBIP	PPP2R2D
	DLL1	MBNL1	PPP2R5A
	DLL3	MBNL2	PPP2R5C
	DLL4	MBNL3	PPP3R1
	DLX1	MBOAT2	PPP4R1
	DLX2	MBTD1	PPP6C
	DLX5	MCC	PPTC7
	DLX6	MCEE	PRDM10
	DMAP1	MCM3	PRDM8
	DMBT1	MCM4	PRDX6
	DMBX1	MCM8	PREPL
	DMC1	MCPH1	PRKAA1
	DMD	MCRS1	PRKACB
	DMPK	MDFIC	PRKAG2
	DMRT2	MDGA2	PRKAR1A
	DMRTC2	MDH1	PRKCA
	DMTF1	MDM1	PRKCD
	DMXL1	MDM2	PRKCE
	DMXL2	ME2	PRKD3
	DNA2	MECP2	PRKDC
	DNAH11	MED13	PRKG1
	DNAH12	MED13L	PRMT2
	DNAH14	MED14	PRNP
	DNAH3	MED17	PROM1
	DNAH5	MED23	PRPF18
	DNAH6	MED28	PRPF3
	DNAH8	MED4	PRPF39
	DNAH9	MED6	PRPF40A
	DNAJA2	MEF2D	PRR11
	DNAJA3	MEGF10	PRR12
	DNAJA4	MEGF9	PRRC1
	DNAJB1	MELK	PRRX1
	DNAJB12	MEMO1	PSD3
	DNAJB14	MET	PSEN1
	DNAJB4	METAP1	PSMA2
	DNAJB5	METTL10	PSMA4
	DNAJB7	METTL3	PSMC2
	DNAJB9	METTL7A	PSMD14
	DNAJC10	METTL8	PSMD7
	DNAJC13	MFAP1	PSMF1
	DNAJC15	MFAP3	PSMG1
	DNAJC16	MFF	PSMG2
	DNAJC19	MFGE8	PSPC1
	DNAJC2	MFHAS1	PSPH
	DNAJC21	MFN1	PTAR1
	DNAJC24	MFSD8	PTBP2
	DNAJC25-GNG10	MGAT2	PTCH1
	DNAJC3	MGAT3	PTCHD1
	DNAJC5	MGAT4A	PTEN
	DNAJC6	MGAT4B	PTER
	DNAJC8	MGEA5	PTGFRN
	DNAJC9	MIB1	PTK2B
	DNAL1	MIB2	PTP4A1
	DNM1L	MIER1	PTPN1
	DNM2	MIER3	PTPN13
	DNM3	MINA	PTPN14
	DNMBP	MINPP1	PTPN21
	DNTT	MIPOL1	PTPN6
	DNTTIP2	MITF	PTPRA
	DOCK1	MKI67	PTPRE
	DOCK10	MKL1	PTPRJ
	DOCK11	MKL2	PUM1
	DOCK2	MKLN1	PUM2
	DOCK3	MKNK2	PURA
	DOCK4	MKRN1	PURB
	DOCK5	MLLT10	PUS7
	DOCK6	MLLT4	PWP1
	DOCK7	MMAA	PWWP2A
	DOCK9	MMAB	PXDN
	DOK1	MMGT1	PXMP4
	DOK4	MMP14	PYGL
	DOK5	MMP15	QKI
	DOK6	MN1	QSER1
	DONSON	MND1	QSOX2
	DOPEY1	MNT	RAB10
	DPAGT1	MNX1	RAB11A
	DPH5	MOAP1	RAB11B
	DPM1	MON1B	RAB11FIP1
	DPP4	MORC2	RAB12
	DPY19L1	MORC3	RAB14
	DPY19L2	MORF4L2	RAB18
	DPY19L2P1	MOSPD2	RAB21
	DPY19L2P2	MOSPD3	RAB22A
	DPY19L3	MPHOSPH10	RAB27A
	DPY19L4	MPHOSPH6	RAB28
	DPY30	MPHOSPH8	RAB2A
	DPYS	MPHOSPH9	RAB2B
	DPYSL3	MPL	RAB31
	DRAM1	MPP5	RAB3GAP2
	DRD1	MPP6	RAB3IP
	DRD2	MPP7	RAB40C
	DROSHA	MPZL2	RAB5B
	DSC1	MREG	RAB6A
	DSC2	MRPL15	RAB6B
	DSC3	MRPL16	RABGAP1
	DSCAM	MRPL17	RABGEF1
	DSCAML1	MRPL18	RABGGTB
	DSCR3	MRPL19	RABL3
	DSE	MRPL22	RAD1
	DSEL	MRPL28	RAD17
	DSG1	MRPL3	RAD18
	DSG2	MRPL30	RAD21
	DSG3	MRPL34	RAD23B
	DST	MRPL35	RAD50
	DSTYK	MRPL39	RAD54B
	DTD1	MRPL44	RAI1
	DTL	MRPL49	RALBP1
	DTNA	MRPL50	RALGPS2
	DTWD1	MRPS16	RANBP2
	DTWD2	MRPS17	RAP1A
	DTX3	MRPS18A	RAP1B
	DTX4	MRPS18B	RAP1GDS1
	DUOXA2	MRPS22	RAP2C
	DUSP1	MRPS23	RAPGEF2
	DUSP11	MRPS25	RAPGEF4
	DUSP12	MRPS26	RAPGEF6
	DUSP16	MRPS27	RAPH1
	DUSP18	MRPS35	RASAL2
	DUSP19	MRPS36	RASGEF1B
	DUSP28	MRPS9	RASSF8
	DUSP4	MSC	RBAK
	DUSP6	MSH2	RBBP5
	DUSP8	MSH3	RBBP6
	DVL1	MSI1	RBBP8
	DYM	MSI2	RBM12B
	DYNC1H1	MSX1	RBM22
	DYNC1I2	MSX2	RBM23
	DYNC1LI2	MTA1	RBM25
	DYNC2LI1	MTA3	RBM26
	DYNLT3	MTAP	RBM27
	DYRK1A	MTBP	RBM28
	DYRK2	MTDH	RBM33
	DYRK3	MTF1	RBM39
	DYX1C1	MTF2	RBM5
	DZIP1	MTFR1	RBM7
	DZIP1L	MTHFD2	RBMS1
	DZIP3	MTHFS	RBMS2
	E2F3	MTM1	RBMX
	E2F5	MTMR1	RBPJ
	E2F6	MTMR12	RBPMS2
	E2F8	MTMR3	RC3H2
	E4F1	MTMR6	RCAN1
	EAF1	MTRF1	RCAN2
	EAPP	MTUS1	RCL1
	EBAG9	MTX3	RDH10
	EBF1	MUC16	RDH11
	EBF2	MXD1	REEP1
	EBF3	MXI1	REEP3
	ECHDC1	MYADM	REEP5
	ECM2	MYB	REL
	ECSCR	MYBPC3	RELL1
	ECT2	MYC	RERE
	ECT2L	MYCBP2	REST
	EDA	MYD88	REV1
	EDA2R	MYO15B	RFC3
	EDAR	MYO19	RFC4
	EDEM1	MYO1E	RFX2
	EDEM3	MYO5A	RGMA
	EDIL3	MYO5B	RGMB
	EDN2	MYO9A	RHBDD1
	EDNRA	MYSM1	RHEB
	EDNRB	MYT1	RHOF
	EEA1	N4BP2L2	RHOT1
	EED	NAALADL2	RHPN2
	EEF1E1	NAB1	RIC8B
	EEF2	NAF1	RICTOR
	EEF2K	NANP	RIF1
	EFCAB1	NAP1L1	RIMKLB
	EFCAB10	NAPB	RIOK1
	EFCAB5	NARS	RIOK2
	EFCAB7	NASP	RIT1
	EFEMP1	NAT1	RMND5A
	EFEMP2	NAT8L	RNF122
	EFHC1	NBEA	RNF125
	EFHC2	NBPF14	RNF128
	EFHD1	NBPF15	RNF13
	EFNA1	NCAM1	RNF138
	EFNA2	NCAPD2	RNF139
	EFNA5	NCAPD3	RNF149
	EFNB1	NCAPH	RNF169
	EFNB2	NCBP2	RNF180
	EFR3A	NCDN	RNF19A
	EFR3B	NCK1	RNF2
	EFTUD2	NCKAP1	RNF214
	EGF	NCL	RNF216
	EGFEM1P	NCOA1	RNF4
	EGFL6	NCOA3	RNF41
	EGFLAM	NCOA4	RNF44
	EGLN1	NCOA6	RNF6
	EGLN3	NCOA7	RNF8
	EGR1	NDC80	RNMT
	EGR2	NDEL1	RNPS1
	EGR3	NDFIP1	ROBO1
	EHBP1	NDUFA12	ROCK1
	EHF	NDUFB4	ROCK2
	EHHADH	NDUFC2	RP2
	EID1	NDUFS3	RPAIN
	EID2	NDUFV2	RPE
	EIF1AD	NEK1	RPGRIP1L
	EIF1AX	NEK2	RPL32P3
	EIF2AK1	NEK3	RPRD1A
	EIF2AK2	NEK7	RPRD1B
	EIF2AK3	NENF	RPRD2
	EIF2AK4	NET1	RPS29
	EIF2S1	NETO2	RPS3
	EIF3E	NEXN	RPS6KA3
	EIF3F	NF1	RPS6KA5
	EIF3G	NFAT5	RQCD1
	EIF3H	NFE2L2	RRM2B
	EIF3J	NFIA	RRN3
	EIF4A2	NFIL3	RRP15
	EIF4A3	NFKBIA	RSBN1
	EIF4B	NFKBIB	RSBN1L
	EIF4E	NFKBIZ	RSRC2
	EIF4E3	NFS1	RTN4
	EIF4ENIF1	NFYA	RUFY2
	EIF4G2	NFYB	RUNX1T1
	EIF4G3	NGDN	RWDD2A
	EIF5	NHEJ1	RWDD3
	EIF5A2	NHLRC2	RYBP
	EIF5AL1	NHS	SACM1L
	ELAC2	NIF3L1	SACS
	ELAVL1	NIN	SALL1
	ELAVL2	NINJ1	SAP18
	ELAVL3	NIP7	SAP30L
	ELF1	NIPA1	SASH1
	ELF2	NIPA2	SASS6
	ELF3	NISCH	SATB1
	ELK1	NKRF	SATB2
	ELK4	NKTR	SAV1
	ELL2	NLE1	SBF2
	ELMO1	NLGN1	SBNO1
	ELMO2	NLGN2	SCAMP1
	ELMOD1	NLGN4X	SCAPER
	ELMOD2	NLK	SCARB2
	ELOVL2	NLRP2	SCHIP1
	ELOVL4	NOL8	SCLT1
	ELOVL5	NOLC1	SCML1
	ELOVL6	NOMO2	SCML2
	ELOVL7	NOTCH2	SCN2A
	ELP2	NOV	SCRN1
	ELP4	NOVA1	SDC2
	EMB	NPAT	SDHD
	EMBP1	NPC1	SEC22B
	EMG1	NPEPPS	SEC23A
	EML1	NPM3	SEC24A
	EML4	NPNT	SEC24B
	EML5	NPTX1	SEC24D
	EMP1	NR1D1	SEC31A
	EMP2	NR2C2	SEC62
	EMX2	NR2F1	SEH1L
	EN1	NR2F2	SEL1L
	EN2	NR3C1	SEMA3C
	ENAH	NR4A1	SEMA3D
	ENAM	NR5A2	SEMA3E
	ENC1	NRCAM	SEMA4D
	ENOPH1	NRF1	SEMA6D
	ENOX2	NRIP1	SENP2
	ENPEP	NRP1	SENP6
	ENPP1	NRXN2	SEPHS1
	ENPP2	NRXN3	SEPSECS
	ENPP4	NSL1	SERAC1
	ENPP5	NSMCE2	SERBP1
	ENPP6	NT5DC1	SERINC1
	ENSA	NT5DC3	SERP1
	ENTHD1	NTN4	SERPINB5
	ENTPD1	NUCB2	SERPINB8
	ENTPD3	NUCKS1	SERPINH1
	ENTPD5	NUDCD1	SERTAD2
	ENTPD7	NUDCD2	SESTD1
	ENY2	NUDT10	SETD1A
	EOMES	NUDT12	SETD2
	EP400	NUDT21	SETD7
	EPAS1	NUDT3	SETX
	EPB41	NUDT4	SF3B1
	EPB41L1	NUDT7	SF3B2
	EPB41L2	NUF2	SF3B3
	EPB41L4A	NUFIP2	SFMBT2
	EPB41L4B	NUMB	SFRP1
	EPB41L5	NUP153	SFRP2
	EPC1	NUP160	SGCB
	EPC2	NUP205	SGK3
	EPCAM	NUP37	SGMS2
	EPGN	NUP50	SGOL1
	EPHA1	NUP54	SGPP1
	EPHA3	NUP93	SH2D3C
	EPHA4	NUP98	SH3BGRL
	EPHA5	NUPL2	SH3BGRL2
	EPHA7	NUS1	SH3BP5
	EPHA8	NUSAP1	SHC1
	EPHB1	NXF1	SHC3
	EPHB4	OAS2	SHISA3
	EPHX2	OAT	SHOC2
	EPM2AIP1	OBFC1	SIAH1
	EPS15	OCIAD1	SIN3A
	EPS15L1	OGFRL1	SIRT1
	EPS8	OIP5	SIX1
	EPT1	ONECUT2	SKI
	ERAP1	OPA1	SKP1
	ERAP2	OR1K1	SLBP
	ERBB4	ORMDL1	SLC12A7
	ERC1	ORMDL3	SLC16A1
	ERC2	OSBPL10	SLC16A14
	ERCC3	OSBPL11	SLC17A5
	ERCC4	OSBPL6	SLC19A2
	ERCC6	OSBPL8	SLC1A1
	ERCC6L	OSBPL9	SLC20A1
	EREG	OSGEPL1	SLC20A2
	ERI1	OSGIN2	SLC23A2
	ERI2	OSR2	SLC25A12
	ERLEC1	OSTM1	SLC25A21
	ERLIN2	OTUD1	SLC25A27
	ERMN	OTUD4	SLC25A32
	ERRFI1	OTUD6B	SLC25A37
	ESCO1	OTX1	SLC25A40
	ESCO2	OXA1L	SLC25A44
	ESD	OXR1	SLC26A2
	ESF1	P2RY6	SLC2A1
	ESM1	PA2G4	SLC2A12
	ESR1	PACRGL	SLC2A13
	ESRP1	PAFAH1B1	SLC30A5
	ESRRA	PAFAH1B2	SLC30A6
	ESRRB	PAG1	SLC30A7
	ESRRG	PAH	SLC30A9
	ESYT2	PAICS	SLC35A1
	ESYT3	PAIP1	SLC35A3
	ETF1	PAIP2	SLC35A5
	ETFB	PAK1IP1	SLC35E1
	ETFDH	PAK2	SLC35F2
	ETNK1	PAK3	SLC35F5
	ETNK2	PALB2	SLC37A3
	ETS1	PALM2-AKAP2	SLC38A1
	ETS2	PAM	SLC38A2
	ETV1	PANK1	SLC39A10
	ETV3	PANK2	SLC39A14
	ETV4	PANK3	SLC39A6
	ETV5	PANK4	SLC39A9
	EVI5	PAPD4	SLC41A2
	EVPLL	PAPD5	SLC44A5
	EWSR1	PAPOLA	SLC4A7
	EXD2	PAPOLG	SLC5A3
	EXO1	PAQR3	SLC5A8
	EXOC5	PARD3	SLC6A15
	EXOC6	PARD3B	SLC7A1
	EXOC6B	PARD6B	SLC7A11
	EXOC8	PARG	SLC7A14
	EXOG	PARP1	SLC7A2
	EXOSC10	PARP14	SLC7A6
	EXOSC9	PARP2	SLC9A2
	EXPH5	PARP6	SLC9A6
	EXTL2	PASK	SLC9A7
	EXTL3	PATL1	SLCO4C1
	EYA1	PAX3	SLK
	EYA4	PAX9	SLTM
	EYS	PBK	SLU7
	EZH1	PBX3	SMAD1
	EZR	PCBP1	SMAD2
	F11	PCBP2	SMAD4
	F2R	PCDH11Y	SMAD7
	F2RL1	PCDH7	SMAP1
	F2RL2	PCDH9	SMARCA2
	F3	PCDHA5	SMARCAD1
	F5	PCDHGA12	SMC1A
	F7	PCDHGA8	SMC3
	FA2H	PCF11	SMC6
	FAAH2	PCGF3	SMCHD1
	FABP2	PCGF5	SMNDC1
	FADS1	PCGF6	SMOC1
	FAF2	PCM1	SMPDL3A
	FAH	PCNA	SNAI2
	FAHD1	PCNP	SNAP23
	FAIM2	PCNT	SNAP29
	FAM102B	PCSK2	SNAPC1
	FAM103A1	PCSK5	SNCA
	FAM104A	PDCD10	SNRK
	FAM105A	PDCD2	SNRPB
	FAM107A	PDCD4	SNRPB2
	FAM107B	PDCD7	SNRPE
	FAM110B	PDCL	SNTB1
	FAM110C	PDCL2	SNTB2
	FAM111A	PDE10A	SNUPN
	FAM114A1	PDE1A	SNX10
	FAM117A	PDE5A	SNX12
	FAM120A	PDE6D	SNX13
	FAM120C	PDE7A	SNX16
	FAM122A	PDE7B	SNX2
	FAM122B	PDE8B	SNX25
	FAM124A	PDGFC	SNX30
	FAM126A	PDGFRA	SNX4
	FAM126B	PDGFRL	SNX9
	FAM127A	PDHX	SOCS4
	FAM129A	PDIA6	SOCS5
	FAM133A	PDIK1L	SOCS6
	FAM133B	PDK4	SON
	FAM134A	PDLIM3	SORBS1
	FAM135A	PDLIM5	SORBS2
	FAM136A	PDS5B	SORCS1
	FAM13A	PDXK	SORCS3
	FAM13B	PDZD8	SORT1
	FAM13C	PEA15	SOS2
	FAM149A	PELI1	SOX6
	FAM149B1	PELI2	SOX9
	FAM150A	PEX11B	SP1
	FAM150B	PEX13	SP3
	FAM151B	PEX14	SP4
	FAM160B1	PEX3	SPAG1
	FAM161A	PEX5	SPAG16
	FAM161B	PFDN1	SPAST
	FAM162A	PFDN4	SPATA13
	FAM163A	PFDN5	SPATA6
	FAM167A	PFDN6	SPC25
	FAM168B	PFKM	SPCS1
	FAM169A	PFN2	SPCS3
	FAM171A1	PGAM1	SPECC1L
	FAM171B	PGAP1	SPIN1
	FAM172A	PGGT1B	SPIRE1
	FAM173B	PGM2	SPIRE2
	FAM174A	PGRMC2	SPRED2
	FAM177A1	PHACTR2	SPRY1
	FAM179A	PHACTR3	SPRY2
	FAM179B	PHAX	SPTBN1
	FAM184A	PHC2	SPTLC1
	FAM185A	PHC3	SPTLC2
	FAM186A	PHF1	SQLE
	FAM188A	PHF10	SRD5A1
	FAM196A	PHF12	SREBF1
	FAM198B	PHF13	SRFBP1
	FAM199X	PHF14	SRGAP1
	FAM19A2	PHF2	SRI
	FAM19A4	PHF20L1	SRRM1
	FAM19A5	PHF21A	SS18L1
	FAM200B	PHF23	SS18L2
	FAM201A	PHF3	SSBP1
	FAM20B	PHF6	SSBP2
	FAM26E	PHF8	SSTR1
	FAM26F	PHLDA1	SSX2IP
	FAM32A	PHTF1	ST18
	FAM35A	PI4K2A	ST7L
	FAM3C	PIAS1	ST8SIA4
	FAM43A	PIAS2	STAG1
[truncated: 4,903 more rows]

## Sheet: Fig S2G
	Figure S2G
Figure S2F
		Statistical Significance:	p<0.000001	p<0.000001	p<0.000001	p<0.000001
[PUM1&2] vs [CNOT1] vs [CNOT7&8] = PUM+CNOT	PRE	BOUND	[PRE] vs [BOUND]	[BOUND] vs [PUM+CNOT]	[PRE] vs [PUM+CNOT]	[BOUND] vs [PRE] vs [PUM+CNOT]
A4GALT	MARCH_1	AAMP	AAMP	ABL2	ABL2	ABL2
ABHD17B	MARCH_5	AASDHPPT	AASDHPPT	AFF4	ANKRD33B	ANKRD50
ABL2	MARCH_6	ABAT	ABCC5	ANKRD50	ANKRD50	ARHGAP12
AC004997.1	MARCH_7	ABCB1	ABHD10	ARHGAP12	ARHGAP12	ARHGEF7
AC006511.5	SEPT_1	ABCC5	ABHD13	ARHGEF7	ARHGEF10L	ARL5B
AC012213.5	SEPT_7	ABHD10	ABHD3	ARL5B	ARHGEF7	ARL8A
AC027644.4	SEPT_8	ABHD13	ABHD5	ARL8A	ARID3A	ASAP1
AC044839.3	SEPT_10	ABHD3	ABI1	ASAP1	ARL5B	ATP6V1B2
AC051619.6	A1CF	ABHD5	ABI2	ATP6V1B2	ARL8A	BCL10
AC118553.2	A2M	ABI1	ABL2	ATP6V1H	ASAP1	BTG1
AC136616.1	AADACL3	ABI2	ABLIM1	B3GNT2	ATP6V1B2	C18orf21
AFF4	AAGAB	ABL2	ABLIM3	BCL10	BAZ1A	C1orf52
AL121758.1	AAK1	ABLIM1	ACAP2	BTG1	BCL10	C6orf136
AL133500.1	AAMP	ABLIM3	ACBD3	C18orf21	BHLHE40	CCDC12
ANKRD33B	AASDH	ACAP2	ACBD5	C1orf52	BTG1	CCNE2
ANKRD50	AASDHPPT	ACBD3	ACHE	C6orf136	C18orf21	CCNG2
AP000944.5	AASS	ACBD5	ACSL3	CCDC12	C1orf52	CD2AP
ARHGAP12	ABCA1	ACBD6	ACSL4	CCNE2	C6orf136	CD58
ARHGAP27P1-BPTFP1-KPNA2P3	ABCA10	ACHE	ACTG1	CCNG2	CASKIN2	CDC123
ARHGEF10L	ABCA13	ACOT4	ACTR10	CD2AP	CCDC12	CDK7
ARHGEF7	ABCA2	ACOT9	ACTR3	CD55	CCNE2	CDKN1A
ARID3A	ABCA4	ACSL3	ACTR3B	CD58	CCNG2	CKS2
ARL5B	ABCA5	ACSL4	ACVR1B	CDC123	CD2AP	CMIP
ARL8A	ABCA6	ACTG1	ACVR2A	CDK7	CD58	COQ10B
ASAP1	ABCA8	ACTL6A	ACVR2B	CDKN1A	CDC123	CRIM1
ATP6V0E1	ABCA9	ACTR10	ADAM22	CKS2	CDK12	CSNK1G3
ATP6V1B2	ABCB11	ACTR1B	ADAM9	CMIP	CDK7	CYTH1
ATP6V1H	ABCB5	ACTR3	ADAMTS1	COQ10B	CDK8	DIP2B
B3GNT2	ABCB7	ACTR3B	ADAMTS4	CRIM1	CDKN1A	DKK1
BAK1	ABCC10	ACVR1	ADAMTS5	CSNK1G3	CHST11	DLGAP4
BATF3	ABCC2	ACVR1B	ADAMTS6	CYTH1	CKS2	DNAJA2
BAZ1A	ABCC3	ACVR2A	ADAR	DIP2B	CLN8	DNAJC24
BCL10	ABCC4	ACVR2B	ADCY10	DKK1	CMIP	DUSP16
BHLHE40	ABCC5	ACYP1	ADCY7	DLGAP4	COQ10B	DUSP8
BTG1	ABCC8	ADAM19	ADCY9	DNAJA2	CRIM1	EIF4A3
BTG2	ABCC9	ADAM22	ADD3	DNAJC24	CSNK1G3	EIF4ENIF1
C17orf80	ABCE1	ADAM9	ADIPOR2	DUSP16	CTSC	ELK1
C18orf21	ABCF1	ADAMTS1	ADM	DUSP8	CYTH1	ENTPD7
C1orf52	ABCF3	ADAMTS4	ADNP	EIF4A3	DENND3	EPC2
C2CD2L	ABCG1	ADAMTS5	ADNP2	EIF4ENIF1	DIP2B	EXOC8
C6orf136	ABCG5	ADAMTS6	ADSS	ELK1	DKK1	F3
CASKIN2	ABHD10	ADAR	AEBP2	ENTPD7	DLGAP4	FAM104A
CCDC12	ABHD11	ADARB1	AFF1	EPC2	DNAJA2	FAM126A
CCN1	ABHD12	ADCK2	AFF3	EXOC8	DNAJB4	FBXO30
CCN2	ABHD12B	ADCY10	AFTPH	F3	DNAJB9	FEM1C
CCNE2	ABHD13	ADCY3	AGA	FAM104A	DNAJC24	FERMT2
CCNG2	ABHD2	ADCY7	AGAP3	FAM126A	DUSP16	FGD4
CD2AP	ABHD3	ADCY9	AGFG1	FBXO30	DUSP4	FNIP1
CD55	ABHD5	ADD2	AGGF1	FEM1C	DUSP8	FOXN2
CD58	ABI1	ADD3	AGPAT3	FERMT2	EIF4A3	GCLM
CDC123	ABI2	ADIPOR2	AGPAT5	FGD4	EIF4ENIF1	GNAI1
CDC34	ABI3BP	ADM	AGPS	FNIP1	ELK1	GRB10
CDC42SE1	ABL2	ADNP	AGTPBP1	FOXN2	ENTPD7	GSK3B
CDK12	ABLIM1	ADNP2	AHCTF1	FXR2	EPB41L5	GTF2B
CDK7	ABLIM2	ADO	AHDC1	GCLM	EPC2	HERC4
CDK8	ABLIM3	ADSS	AHR	GNAI1	ETS1	HK2
CDKN1A	ABR	AEBP2	AHSA1	GRB10	ETV5	HMGCR
CDYL	ABRA	AFAP1L2	AHSG	GSK3B	EXOC8	HSPA13
CHST11	ACAD8	AFF1	AICDA	GTF2B	F3	IFFO2
CKS2	ACADL	AFF3	AIG1	GTF3C4	FAM104A	IFRD1
CLN8	ACADM	AFF4	AIP	H3F3B	FAM126A	INSIG2
CMIP	ACADSB	AFTPH	AKAP1	HBEGF	FAM160B1	IREB2
CNEP1R1	ACAN	AGA	AKAP12	HERC4	FAM169A	ITCH
CNN3	ACAP2	AGAP3	AKAP13	HK2	FBXO30	ITGA2
COMT	ACBD3	AGFG1	AKAP7	HMGCR	FEM1C	JMJD1C
COQ10B	ACBD5	AGGF1	AKT2	HMOX1	FERMT2	KCNK1
CRIM1	ACBD7	AGPAT3	AKT3	HSPA13	FGD4	KIAA1217
CSNK1G3	ACCSL	AGPAT5	AKTIP	IFFO2	FGFR1OP	KLF5
CTSC	ACHE	AGPS	ALG10	IFRD1	FNIP1	KPNA2
CYTH1	ACOT11	AGTPBP1	ALG10B	INSIG2	FOXN2	KPNA4
CYTH2	ACOXL	AGXT	AMIGO2	IREB2	GCLM	LIG4
DENND3	ACP1	AHCTF1	AMOTL1	ITCH	GDPD1	LIN54
DIP2B	ACP6	AHCYL2	AMOTL2	ITGA2	GNAI1	LMX1B
DKK1	ACSL1	AHDC1	ANAPC13	JMJD1C	GRB10	MBIP
DLGAP4	ACSL3	AHR	ANGEL2	KCNK1	GSK3B	MED13
DNAJA2	ACSL4	AHSA1	ANGPT1	KIAA1217	GTF2B	MED17
DNAJB4	ACSL5	AHSG	ANK2	KLF5	HERC4	MIER1
DNAJB9	ACSL6	AICDA	ANK3	KPNA2	HK2	MKNK2
DNAJC24	ACSS3	AIFM1	ANKH	KPNA4	HMGCR	MORC3
DTX2	ACTA1	AIG1	ANKLE2	LIG4	HMGCS1	MTF2
DUSP16	ACTA2	AIP	ANKRD10	LIN54	HSPA13	NCOA6
DUSP2	ACTB	AK2	ANKRD12	LMX1B	IFFO2	NDEL1
DUSP4	ACTC1	AKAP1	ANKRD17	LRCH3	IFRD1	NPC1
DUSP5	ACTG1	AKAP12	ANKRD36B	MAP2K1	INSIG2	NR4A1
DUSP8	ACTN1	AKAP13	ANKRD40	MBIP	IREB2	NUDT4
EHD1	ACTR10	AKAP7	ANKRD50	MED13	ISCA2	NUP98
EIF1P3	ACTR2	AKAP8	ANKS1B	MED17	ITCH	OSBPL9
EIF4A3	ACTR3	AKT2	ANLN	MIER1	ITGA2	PDCD10
EIF4ENIF1	ACTR3B	AKT3	ANO5	MKNK2	JMJD1C	PEX14
ELK1	ACTR5	AKTIP	ANP32A	MORC3	KCNK1	PIAS1
ELOA	ACTR6	ALB	ANP32B	MRPL39	KDM2A	PNRC1
EMC2	ACVR1B	ALDH1A2	ANP32E	MTF2	KDM6B	POLR2B
EMC7	ACVR1C	ALDOB	AOC3	MYADM	KIAA1217	PPM1B
ENTPD7	ACVR2A	ALG10	AP1S1	NCOA6	KLF2	PPP2R1B
EPB41L5	ACVR2B	ALG10B	AP1S3	NDEL1	KLF5	PPTC7
EPC2	ACVRL1	ALKBH1	AP3M2	NPC1	KPNA2	PRKCD
EPHA2	ADAM10	ALPL	APBB2	NR4A1	KPNA4	PSD3
EPN2	ADAM11	ALS2CL	APC	NUDT4	KRAS	PSMG2
EPS8L1	ADAM12	AMH	API5	NUP98	LDLR	RAB22A
ERCC1	ADAM17	AMIGO2	APP	OSBPL9	LIG4	RAP1B
ETS1	ADAM22	AMMECR1L	APPL1	PDCD10	LIMA1	RASAL2
ETV5	ADAM23	AMOTL1	AQP3	PEX14	LIN54	RBM27
EXOC8	ADAM32	AMOTL2	ARAF	PIAS1	LMX1B	RCL1
F3	ADAM33	AMPH	ARCN1	PNRC1	LRCH1	RHEB
FAM104A	ADAM8	ANAPC10	AREG	POLR2B	LRP6	RHOF
FAM126A	ADAM9	ANAPC13	ARF1	PPM1B	MAP2K3	RHPN2
FAM160B1	ADAMTS1	ANGEL2	ARF6	PPP2R1B	MAP3K2	RIOK1
FAM169A	ADAMTS10	ANGPT1	ARFGAP3	PPP4R2	MAP3K7	RNF216
FAM214B	ADAMTS12	ANK2	ARFGEF1	PPTC7	MARK2	SACM1L
FBXO30	ADAMTS18	ANK3	ARFGEF2	PRKCD	MBIP	SASH1
FEM1C	ADAMTS19	ANKAR	ARFIP1	PSD3	MED13	SEC24B
FERMT2	ADAMTS20	ANKFN1	ARGLU1	PSMG2	MED17	SEC24D
FGD4	ADAMTS3	ANKH	ARHGAP12	RAB22A	MICB	SIN3A
FGFR1OP	ADAMTS4	ANKHD1	ARHGAP28	RAP1B	MIER1	SLC2A1
FNIP1	ADAMTS5	ANKLE2	ARHGAP5	RASAL2	MKNK2	SLC30A7
FOSL1	ADAMTS6	ANKRD10	ARHGEF11	RBM27	MORC3	SLC37A3
FOXN2	ADAMTS9	ANKRD12	ARHGEF12	RCL1	MTF2	SMAD7
FRMD8	ADAMTSL1	ANKRD16	ARHGEF19	RHEB	NCOA6	SNX4
FXR2	ADAMTSL3	ANKRD17	ARHGEF3	RHOF	NDEL1	SNX9
GCLM	ADAR	ANKRD36B	ARHGEF7	RHPN2	NEDD4L	SPRY2
GDPD1	ADARB2	ANKRD40	ARID1B	RIOK1	NFE2L3	TAF4
GFOD1	ADAT2	ANKRD50	ARID2	RNF216	NOP16	TAF4B
GJB3	ADCK3	ANKRD9	ARID4A	SACM1L	NPC1	TANC1
GNAI1	ADCK4	ANKS1B	ARID4B	SASH1	NR4A1	TBC1D12
GOSR2	ADCY1	ANLN	ARID5B	SBDS	NUDT4	TBX18
GPAT3	ADCY10	ANO10	ARL5A	SCAMP2	NUP98	TOB2
GRB10	ADCY2	ANO5	ARL5B	SEC24B	OSBP	TRIO
GSK3B	ADCY5	ANO6	ARL6	SEC24D	OSBPL9	TSC22D2
GTF2B	ADCY7	ANP32A	ARL6IP1	SIN3A	PCGF2	TTK
GTF3C4	ADCY9	ANP32B	ARL6IP5	SLC2A1	PDCD10	TXNL1
H3F3B	ADCYAP1	ANP32E	ARL6IP6	SLC30A7	PDGFB	UBE2A
H3F3C	ADCYAP1R1	ANXA5	ARL8A	SLC37A3	PEX14	UBTD2
HBEGF	ADD1	AOC3	ARL8B	SMAD7	PGM2L1	UNC50
HERC4	ADD3	AP1G1	ARMC1	SNX4	PIAS1	USP53
HIPK3	ADH1B	AP1S1	ARMCX6	SNX9	PNRC1	WAC
HK2	ADH4	AP1S3	ARNTL	SPRY2	POLR2A	WDR26
HMGCR	ADHFE1	AP3M2	ARPC5	TAF4	POLR2B	ZC3H15
HMGCS1	ADIPOR2	AP4S1	ARRDC1	TAF4B	PPM1B	ZNF706
HMOX1	ADK	APBB2	ARSK	TANC1	PPP2CB
HSPA13	ADM	APC	ARV1	TBC1D12	PPP2R1B
IFFO2	ADNP	APEX1	ASAH1	TBPL1	PPTC7
IFRD1	ADNP2	APEX2	ASAP1	TBX18	PRKCD
INSIG2	ADRA1A	API5	ASAP2	TNFRSF10B	PSD3
IREB2	ADRA1B	APIP	ASCC2	TOB2	PSMG2
ISCA2	ADRA1D	APOLD1	ASCC3	TRIO	RAB22A
ITCH	ADRA2A	APOOL	ASF1A	TSC22D2	RALGAPB
ITGA2	ADRB1	APP	ASH1L	TTK	RAP1B
ITGA5	ADRBK2	APPL1	ASPH	TXNL1	RASAL2
ITPKC	ADRM1	AQP3	ASPM	UBASH3B	RBM27
JMJD1C	ADSS	ARAF	ASXL1	UBE2A	RCL1
KCNK1	ADSSL1	ARCN1	ASXL2	UBE2B	RELB
KDM2A	AEBP2	AREG	ATAD1	UBTD2	RGS14
KDM5B	AES	ARF1	ATAD2	UNC50	RHEB
KDM6B	AFAP1	ARF4	ATF2	USP53	RHOF
KIAA1217	AFF1	ARF6	ATF7IP	VCL	RHPN2
KLF2	AFF2	ARFGAP3	ATG10	WAC	RIOK1
KLF5	AFF3	ARFGEF1	ATG3	WDR20	RNF216
KPNA2	AFG3L2	ARFGEF2	ATL1	WDR26	RNF38
KPNA4	AFTPH	ARFIP1	ATL2	ZC3H15	SACM1L
KRAS	AGA	ARGLU1	ATM	ZFAND3	SASH1
LAMB3	AGAP1	ARHGAP12	ATMIN	ZNF706	SBNO2
LDB1	AGAP3	ARHGAP25	ATP11A		SCYL1
LDLR	AGBL2	ARHGAP28	ATP11B		SEC24B
LETM2	AGBL3	ARHGAP5	ATP11C		SEC24D
LIG4	AGBL4	ARHGDIB	ATP13A3		SECISBP2L
LIMA1	AGER	ARHGEF11	ATP1B3		SGTB
LIN54	AGFG1	ARHGEF12	ATP2A1		SH3BP2
LIPH	AGGF1	ARHGEF19	ATP2B1		SIN3A
LMBR1L	AGK	ARHGEF2	ATP5C1		SKIL
LMX1B	AGL	ARHGEF3	ATP5G3		SLC2A1
LRCH1	AGPAT3	ARHGEF7	ATP5S		SLC30A7
LRCH3	AGPAT5	ARID1B	ATP6AP1		SLC37A3
LRP6	AGPS	ARID2	ATP6AP2		SMAD7
MAP1LC3B2	AGT	ARID4A	ATP6V1B2		SNIP1
MAP2K1	AGTPBP1	ARID4B	ATP6V1C1		SNX4
MAP2K3	AGTR1	ARID5B	ATP9A		SNX9
MAP3K2	AHCTF1	ARL1	ATR		SP100
MAP3K7	AHDC1	ARL5A	ATRN		SPRY2
MARK2	AHI1	ARL5B	ATRNL1		SPSB1
MBIP	AHNAK	ARL6	ATXN1L		STXBP5
MED13	AHR	ARL6IP1	ATXN2		SYNJ2
MED17	AHSA1	ARL6IP5	ATXN7		TACC1
METRNL	AHSG	ARL6IP6	AURKA		TAF13
MFSD9	AICDA	ARL8A	AXIN1		TAF4
MICB	AIDA	ARL8B	AXIN2		TAF4B
MIER1	AIG1	ARMC1	AZI2		TANC1
MIR6751	AIM1	ARMC10	AZIN1		TAOK1
MISP	AIMP1	ARMC9	B3GNT5		TBC1D12
MKNK2	AIP	ARMCX2	B4GALT1		TBX18
MON1A	AK3	ARMCX3	B4GALT5		TEX10
MORC3	AK5	ARMCX6	B4GALT6		TIPARP
MRPL39	AK7	ARNTL	BAALC		TJP1
MTF2	AKAP1	ARPC3	BACH1		TMED7-TICAM2
MYADM	AKAP10	ARPC5	BACH2		TOB2
MYEOV	AKAP11	ARPC5L	BAG4		TRIO
MYL9	AKAP12	ARRDC1	BAHCC1		TSC22D2
NABP1	AKAP13	ARSK	BAHD1		TSPAN14
NBN	AKAP2	ARTN	BAIAP2		TTK
NCOA6	AKAP5	ARV1	BAIAP2L1		TXNL1
NDEL1	AKAP6	ASAH1	BAP1		TYW3
NECAP2	AKAP7	ASAP1	BAZ2B		UAP1
NEDD4L	AKAP8L	ASAP2	BBC3		UBE2A
NEU1	AKAP9	ASB1	BBS10		UBR1
NFE2L3	AKIRIN1	ASB8	BBS7		UBTD2
NFKB2	AKIRIN2	ASCC2	BCAP29		UNC50
NFKBIE	AKNA	ASCC3	BCAR1		USP47
NGFR	AKR1C2	ASF1A	BCAR3		USP53
NOP16	AKT2	ASH1L	BCAS3		VPS37A
NOTCH2NLA	AKT3	ASNSD1	BCKDHB		VTI1A
NOTCH2NLB	AKTIP	ASPH	BCL10		WAC
NOTCH2NLC	ALAS1	ASPM	BCL11A		WDR26
NPC1	ALCAM	ASTE1	BCL2L1		WNT7B
NR1H2	ALDH1A1	ASXL1	BCL2L11		ZC3H15
NR4A1	ALDH1L2	ASXL2	BCL3		ZFAND5
NUDT4	ALDH6A1	ATAD1	BCL6		ZNF706
NUP98	ALDH7A1	ATAD2	BCL9L
OSBP	ALDH9A1	ATF2	BCOR
OSBPL2	ALG1	ATF7IP	BEND7
OSBPL9	ALG10	ATG10	BEX4
PANX1	ALG10B	ATG3	BICD1
PBDC1	ALG2	ATL1	BLCAP
PCGF2	ALG5	ATL2	BLOC1S2
PDCD10	ALG6	ATM	BLZF1
PDGFA	ALG9	ATMIN	BMP2
PDGFB	ALKBH8	ATN1	BMPR1B
PEX14	ALLC	ATP11A	BMPR2
PGM2L1	ALMS1	ATP11B	BNIP2
PIAS1	ALPK1	ATP11C	BNIP3L
PIAS4	ALPK2	ATP13A3	BPTF
PIP4P1	ALPK3	ATP1B3	BRD1
PLAGL2	ALS2	ATP2A1	BRD2
PLAUR	ALS2CR11	ATP2B1	BRD3
PLK3	AMD1	ATP5C1	BRD7
PNRC1	AMDHD1	ATP5G3	BRMS1L
POLR2A	AMHR2	ATP5S	BRPF1
POLR2B	AMIGO2	ATP6AP1	BRPF3
PPM1B	AMMECR1	ATP6AP2	BRWD1
PPP2CB	AMN1	ATP6V1B2	BTAF1
PPP2R1B	AMOTL1	ATP6V1C1	BTBD1
PPP2R5B	AMOTL2	ATP6V1G1	BTBD2
PPP4R2	AMTN	ATP6V1H	BTBD3
PPT2	AMY1A	ATP8B2	BTBD7
PPTC7	AMY2B	ATP9A	BTG1
PRAG1	AMZ2	ATR	BTNL8
PRKCD	ANAPC1	ATRN	BUB1
PRSS8	ANAPC13	ATRNL1	BUB1B
PSD3	ANAPC16	ATXN1L	BUB3
PSEN2	ANAPC4	ATXN2	C10orf88
PSMG2	ANGEL1	ATXN7	C12orf29
PTP4A2P2	ANGEL2	AUH	C12orf4
RAB22A	ANGPT1	AURKA	C12orf66
RAB5IF	ANGPT2	AXIN1	C14orf119
RALGAPB	ANGPTL1	AXIN2	C14orf2
RAP1B	ANGPTL2	AZI2	C14orf37
RASAL2	ANGPTL3	AZIN1	C14orf79
RBM19	ANGPTL7	B3GAT2	C15orf40
RBM27	ANK2	B3GNT2	C15orf61
RBM38	ANK3	B3GNT5	C16orf52
RCL1	ANKFY1	B4GALT1	C16orf70
RELB	ANKH	B4GALT5	C16orf87
RESF1	ANKIB1	B4GALT6	C17orf58
RGS14	ANKLE2	BAALC	C18orf21
RHEB	ANKMY2	BACE2	C18orf25
RHOF	ANKRA2	BACH1	C18orf54
RHPN2	ANKRD1	BACH2	C1orf52
RIC1	ANKRD10	BAG3	C21orf91
RIOK1	ANKRD11	BAG4	C2orf49
RNF216	ANKRD12	BAHCC1	C3orf33
RNF38	ANKRD13A	BAHD1	C3orf58
RNFT1	ANKRD13C	BAIAP2	C4orf33
SACM1L	ANKRD17	BAIAP2L1	C4orf46
SASH1	ANKRD18A	BAP1	C5orf15
SBDS	ANKRD20A3	BARD1	C5orf24
SBNO2	ANKRD20A4	BAZ2A	C6orf1
SCAMP2	ANKRD20A8P	BAZ2B	C6orf106
SCYL1	ANKRD22	BBC3	C6orf136
SDE2	ANKRD26	BBS10	C7orf31
SDF2	ANKRD26P1	BBS7	C8orf34
SEC24B	ANKRD27	BCAP29	C9orf78
SEC24D	ANKRD28	BCAR1	CA8
SECISBP2L	ANKRD31	BCAR3	CAB39
SELENOI	ANKRD33B	BCAS2	CACNB2
SELENOS	ANKRD34B	BCAS3	CACNB4
SERPINE1	ANKRD34C	BCDIN3D	CADM1
SERTAD1	ANKRD36	BCKDHB	CADPS2
SESN2	ANKRD36B	BCL10	CALCOCO2
SGTB	ANKRD36BP2	BCL11A	CALCRL
SH2B3	ANKRD40	BCL2L1	CALD1
SH3BP2	ANKRD42	BCL2L11	CALM1
SIN3A	ANKRD44	BCL2L2	CALM2
SKIL	ANKRD45	BCL3	CALM3
SLC26A11	ANKRD46	BCL6	CALU
SLC2A1	ANKRD49	BCL9L	CAMK2D
SLC30A7	ANKRD50	BCOR	CAMKK2
SLC37A3	ANKRD52	BEND7	CAMTA2
SLC43A2	ANKRD55	BEX4	CAND1
SLC6A10P	ANKRD6	BICD1	CANX
SLC9A1	ANKRD7	BID	CAPN2
SMAD7	ANKS1A	BIRC3	CAPN7
SNAI1	ANKS1B	BIRC6	CAPRIN1
SNIP1	ANKS4B	BLCAP	CAPS2
SNX4	ANKS6	BLMH	CAPZA2
SNX9	ANKZF1	BLOC1S2	CASC4
SP100	ANLN	BLZF1	CASD1
SPINDOC	ANO1	BMI1	CASK
SPRY2	ANO3	BMP2	CASP3
SPSB1	ANO4	BMP2K	CASQ2
STXBP5	ANO5	BMPR1B	CAV1
SYNJ2	ANP32A	BMPR2	CBFB
TACC1	ANP32B	BNIP2	CBL
TAF13	ANP32E	BNIP3L	CBWD1
TAF4	ANPEP	BOK	CBX3
TAF4B	ANTXR1	BPTF	CBX4
TANC1	ANTXR2	BRAF	CBX8
TAOK1	ANXA11	BRD1	CCAR1
TASOR2	ANXA2P3	BRD2	CCDC117
TBC1D12	AOC3	BRD3	CCDC12
TBPL1	AP1AR	BRD7	CCDC125
TBX18	AP1S1	BRI3	CCDC126
TEX10	AP1S3	BRMS1L	CCDC14
TIPARP	AP2B1	BRPF1	CCDC25
TJP1	AP2M1	BRPF3	CCDC43
TMED7-TICAM2	AP3M2	BRWD1	CCDC50
TMEM248	AP4B1	BSDC1	CCDC6
TMEM92	AP4E1	BTAF1	CCDC61
TNFAIP1	APAF1	BTBD1	CCDC77
TNFRSF10A	APBA1	BTBD2	CCDC82
TNFRSF10B	APBA2	BTBD3	CCNA2
TNFRSF12A	APBB1IP	BTBD7	CCNB2
TNFSF9	APBB2	BTG1	CCND2
TOB2	APC	BTG3	CCNE2
TOMM70	APC2	BTN3A3	CCNG2
TOR1A	APCDD1	BTNL8	CCNH
TRABD2A	APH1B	BUB1	CCNL1
TRIM8	API5	BUB1B	CCNT2
TRIML2	APLF	BUB3	CCNY
TRIO	APLN	C10orf11	CCR5
TSC22D2	APOBEC4	C10orf88	CCR6
TSPAN14	APOF	C11orf58	CD2AP
TTK	APOL3	C11orf63	CD46
TUBB2A	APOL6	C12orf29	CD47
TUBB6	APP	C12orf4	CD58
TXNL1	APPBP2	C12orf49	CD9
TYW3	APPL1	C12orf66	CDC123
UAP1	APTX	C14orf119	CDC14A
UBASH3B	AQP2	C14orf2	CDC14B
UBE2A	AQP3	C14orf37	CDC27
UBE2B	AQP4	C14orf79	CDC42EP3
UBR1	AQP6	C15orf40	CDC42SE2
UBTD2	AQR	C15orf61	CDC7
UNC50	AR	C16orf52	CDCA7
UPP1	ARAF	C16orf62	CDCA8
USP47	ARAP1	C16orf70	CDH18
USP53	ARAP2	C16orf72	CDH2
VCL	ARCN1	C16orf87	CDH7
VPS37A	AREG	C17orf58	CDK6
VSIR	ARF1	C18orf21	CDK7
VTI1A	ARF3	C18orf25	CDKN1A
WAC	ARF6	C18orf32	CDKN1B
WDR20	ARFGAP3	C18orf54	CDKN2AIP
WDR26	ARFGEF1	C1GALT1	CDON
WNT7B	ARFGEF2	C1GALT1C1	CDR2
YPEL5	ARFIP1	C1orf131	CDS2
YRDC	ARG1	C1orf27	CEBPB
ZC3H15	ARG2	C1orf35	CEBPD
ZFAND3	ARGLU1	C1orf43	CENPA
ZFAND5	ARHGAP11A	C1orf52	CENPE
ZNF706	ARHGAP12	C20orf24	CENPJ
ZYX	ARHGAP17	C21orf91	CENPN
	ARHGAP18	C2orf49	CEP120
	ARHGAP21	C2orf61	CEP135
	ARHGAP23	C3AR1	CEP170
	ARHGAP24	C3orf33	CEP290
	ARHGAP26	C3orf58	CEP350
	ARHGAP28	C4orf32	CEP70
	ARHGAP29	C4orf33	CEP76
	ARHGAP31	C4orf46	CERK
	ARHGAP32	C5orf15	CGGBP1
	ARHGAP39	C5orf24	CHD1
	ARHGAP42	C6orf1	CHD2
	ARHGAP44	C6orf106	CHD7
	ARHGAP5	C6orf136	CHD9
	ARHGAP8	C6orf141	CHEK1
	ARHGEF10	C6orf203	CHEK2
	ARHGEF10L	C7orf31	CHIC1
	ARHGEF11	C8orf34	CHM
	ARHGEF12	C8orf37	CHMP1A
	ARHGEF15	C9orf40	CHMP2B
	ARHGEF16	C9orf64	CHMP4C
	ARHGEF18	C9orf78	CHMP7
	ARHGEF19	CA12	CHN2
	ARHGEF26	CA2	CHRAC1
	ARHGEF3	CA8	CHST9
	ARHGEF33	CAB39	CHSY1
	ARHGEF37	CACHD1	CHSY3
	ARHGEF38	CACNA1A	CHUK
	ARHGEF6	CACNA1D	CISD1
	ARHGEF7	CACNB2	CISD2
	ARHGEF9	CACNB4	CISD3
	ARID1A	CADM1	CKAP2L
	ARID1B	CADM4	CKAP5
	ARID2	CADPS2	CKS2
	ARID3A	CALCOCO2	CLASP1
	ARID4A	CALCRL	CLASP2
	ARID4B	CALD1	CLCN3
	ARID5B	CALM1	CLDN1
	ARIH1	CALM2	CLDND1
	ARL13B	CALM3	CLEC16A
	ARL14	CALU	CLIC4
	ARL17A	CAMK2D	CLINT1
	ARL4A	CAMK2N2	CLIP1
	ARL5A	CAMKK2	CLIP4
	ARL5B	CAMTA2	CLK1
	ARL6	CAND1	CLK2
	ARL6IP1	CANX	CLK4
	ARL6IP5	CAPN2	CLSTN1
	ARL6IP6	CAPN7	CLSTN3
	ARL8A	CAPRIN1	CMIP
	ARL8B	CAPS	CMTM4
	ARMC1	CAPS2	CNBP
	ARMC3	CAPZA1	CNNM1
	ARMC8	CAPZA2	CNOT1
	ARMCX1	CARS2	CNOT10
	ARMCX4	CASC4	CNOT7
	ARMCX6	CASD1	CNOT8
	ARNT2	CASK	CNTN3
	ARNTL	CASKIN1	CNTNAP1
	ARNTL2	CASP3	COBL
	ARPC1A	CASP8	COBLL1
	ARPC4-TTLL3	CASP8AP2	COCH
	ARPC5	CASQ2	COG3
	ARPP19	CAV1	COG6
	ARPP21	CBFB	COIL
	ARRDC1	CBL	COL14A1
	ARRDC4	CBR3	COL4A5
	ARSB	CBWD1	COLEC12
	ARSK	CBX3	COMMD5
	ART3	CBX4	COMMD8
	ARV1	CBX8	COPZ1
	ARX	CCAR1	COQ10B
	ASAH1	CCDC106	COQ7
	ASAP1	CCDC112	CP
	ASAP2	CCDC113	CPE
	ASB11	CCDC117	CPEB3
	ASB13	CCDC12	CPEB4
	ASB5	CCDC121	CPNE4
	ASB7	CCDC125	CPNE8
	ASCC2	CCDC126	CPSF2
	ASCC3	CCDC14	CPSF6
	ASCL1	CCDC25	CRB1
	ASCL4	CCDC43	CRBN
	ASF1A	CCDC47	CREB1
	ASF1B	CCDC50	CREB3L2
	ASH1L	CCDC57	CREB5
	ASPH	CCDC6	CREBBP
	ASPHD2	CCDC61	CREBL2
	ASPM	CCDC77	CREBZF
	ASPN	CCDC80	CRIM1
	ASTN1	CCDC82	CRLS1
	ASTN2	CCDC91	CRY1
	ASXL1	CCNA2	CSNK1D
	ASXL2	CCNB2	CSNK1E
	ASXL3	CCNC	CSNK1G3
	ATAD1	CCND1	CSNK2A1
	ATAD2	CCND2	CSNK2A2
	ATAD2B	CCNE2	CSPP1
	ATAD5	CCNF	CSTF2
	ATF1	CCNG1	CTCF
	ATF2	CCNG2	CTDSP1
	ATF4	CCNH	CTGF
	ATF6	CCNI	CTNND1
	ATF7	CCNL1	CTTNBP2
	ATF7IP	CCNT2	CUL1
	ATG10	CCNY	CUL2
	ATG12	CCNYL1	CUL3
	ATG14	CCR5	CUL5
	ATG16L1	CCR6	CUTC
	ATG2B	CCT3	CUX1
	ATG3	CD2AP	CXADR
	ATG7	CD46	CYLD
	ATL1	CD47	CYP20A1
	ATL2	CD55	CYP26A1
	ATL3	CD58	CYP2B6
	ATM	CD69	CYP2U1
	ATMIN	CD74	CYR61
	ATOH7	CD9	CYTH1
	ATOH8	CDC123	CYTH3
	ATP10D	CDC14A	DAB2
	ATP11A	CDC14B	DACH1
	ATP11B	CDC23	DAGLA
	ATP11C	CDC25A	DBF4
	ATP13A2	CDC27	DBR1
	ATP13A3	CDC42EP3	DBT
	ATP1B1	CDC42SE2	DCBLD1
	ATP1B3	CDC7	DCC
	ATP1B4	CDCA4	DCK
	ATP2A1	CDCA7	DCLRE1C
	ATP2A2	CDCA8	DCP1A
	ATP2B1	CDH18	DCP2
	ATP2B2	CDH2	DCT
	ATP2B4	CDH23	DCUN1D1
	ATP2C1	CDH3	DCUN1D4
	ATP5C1	CDH7	DDHD1
	ATP5G3	CDK2	DDHD2
	ATP5S	CDK2AP1	DDIT3
	ATP6AP1	CDK6	DDX10
	ATP6AP2	CDK7	DDX17
	ATP6V0A2	CDKAL1	DDX18
	ATP6V1A	CDKN1A	DDX21
	ATP6V1B1	CDKN1B	DDX3X
	ATP6V1B2	CDKN2AIP	DDX50
	ATP6V1C1	CDON	DDX55
	ATP7A	CDR2	DDX59
	ATP7B	CDS2	DDX6
	ATP8A1	CEBPB	DEAF1
	ATP8A2	CEBPD	DEK
	ATP8B1	CENPA	DENND4B
	ATP8B4	CENPE	DENND4C
	ATP9A	CENPJ	DEPDC1B
	ATP9B	CENPN	DEPDC5
	ATPIF1	CENPO	DEPDC7
	ATR	CEP120	DGAT1
	ATRN	CEP135	DGKD
	ATRNL1	CEP170	DGKE
	ATRX	CEP290	DHX32
	ATXN1	CEP350	DHX33
	ATXN1L	CEP55	DHX35
	ATXN2	CEP57	DHX36
	ATXN3	CEP70	DIAPH1
	ATXN7	CEP76	DIAPH3
	ATXN7L1	CERK	DICER1
	ATXN7L3	CETN3	DIO3
	ATXN7L3B	CFD	DIP2B
	AURKA	CFDP1	DIP2C
	AUTS2	CGGBP1	DIS3
	AVPR1A	CGN	DISC1
	AXIN1	CHAC2	DKK1
	AXIN2	CHCHD3	DLAT
	AZGP1	CHCHD4	DLC1
	AZI2	CHD1	DLD
	AZIN1	CHD2	DLG1
	B3GALT1	CHD7	DLGAP4
	B3GALT2	CHD8	DLGAP5
	B3GALT5	CHD9	DLL3
	B3GAT1	CHEK1	DLL4
	B3GNT5	CHEK2	DLX2
	B4GALT1	CHERP	DMXL1
	B4GALT2	CHIC1	DNAH11
	B4GALT4	CHIC2	DNAJA2
	B4GALT5	CHM	DNAJA3
	B4GALT6	CHMP1A	DNAJB1
	B9D2	CHMP2B	DNAJB14
	BAALC	CHMP4C	DNAJB5
	BAAT	CHMP7	DNAJC19
	BACE1	CHN2	DNAJC2
	BACH1	CHPF	DNAJC24
	BACH2	CHRAC1	DNAJC5
	BAD	CHST9	DNMBP
	BAG1	CHSY1	DOCK1
	BAG4	CHSY3	DOCK2
	BAG5	CHUK	DOCK4
	BAGE	CISD1	DOCK9
	BAHCC1	CISD2	DONSON
	BAHD1	CISD3	DOPEY1
	BAIAP2	CITED2	DPY19L1
	BAIAP2L1	CKAP2L	DPY19L2P1
	BAP1	CKAP5	DPY19L2P2
	BARHL1	CKS2	DPY19L4
	BAZ1A	CLASP1	DSC2
	BAZ2B	CLASP2	DSC3
	BBC3	CLCC1	DSE
	BBOX1	CLCN3	DSG2
	BBS10	CLDN1	DST
	BBS12	CLDND1	DTWD1
	BBS2	CLEC16A	DTWD2
	BBS7	CLIC2	DUSP1
	BBS9	CLIC4	DUSP11
	BBX	CLINT1	DUSP16
	BCAP29	CLIP1	DUSP18
	BCAR1	CLIP4	DUSP6
	BCAR3	CLK1	DUSP8
	BCAR4	CLK2	DYNC1I2
	BCAS1	CLK4	DYNC1LI2
	BCAS3	CLPTM1	DYNLT3
	BCAT1	CLSTN1	DYRK1A
	BCCIP	CLSTN3	DYRK2
	BCKDHB	CMIP	DZIP1
	BCL10	CMTM3	E2F3
	BCL11A	CMTM4	E2F5
	BCL11B	CMTM6	E2F6
	BCL2	CNBP	E2F8
	BCL2L1	CNNM1	EAPP
	BCL2L11	CNOT1	EBAG9
	BCL2L13	CNOT10	EBF3
	BCL2L15	CNOT4	EDA
	BCL2L2-PABPN1	CNOT7	EDEM1
	BCL3	CNOT8	EDEM3
	BCL6	CNTN3	EDIL3
	BCL6B	CNTNAP1	EDNRA
	BCL9L	COBL	EEA1
	BCLAF1	COBLL1	EED
	BCOR	COCH	EEF2
	BCORL1	COG3	EFNA1
	BDH2	COG5	EFNA5
	BDNF	COG6	EFNB1
	BDP1	COIL	EFNB2
	BEND2	COL14A1	EFR3A
	BEND4	COL1A1	EGLN1
	BEND6	COL4A1	EGR1
	BEND7	COL4A5	EIF1AX
	BEX4	COLEC12	EIF2AK3
	BFAR	COMMD5	EIF3F
	BHLHB9	COMMD8	EIF3J
	BHLHE22	COPB1	EIF4A3
	BHLHE40	COPE	EIF4E
	BHLHE41	COPS2	EIF4ENIF1
	BICD1	COPS5	EIF4G2
	BIVM	COPS8	EIF4G3
	BLCAP	COPZ1	EIF5
	BLM	COQ10A	EIF5A2
	BLOC1S2	COQ10B	ELAVL1
	BLZF1	COQ6	ELF1
	BMF	COQ7	ELF2
	BMP2	CORO1C	ELF3
	BMP3	CP	ELK1
	BMP6	CPE	ELK4
	BMP7	CPEB2	ELL2
	BMP8A	CPEB3	ELMOD2
	BMP8B	CPEB4	ELP4
	BMPER	CPNE1	EML4
	BMPR1A	CPNE3	EMP1
	BMPR1B	CPNE4	EMP2
	BMPR2	CPNE8	EMX2
	BMS1	CPOX	EN1
	BNC1	CPSF2	EN2
	BNC2	CPSF6	ENAH
	BNIP2	CR1L	ENSA
	BNIP3L	CRB1	ENTPD5
	BOC	CRBN	ENTPD7
	BOLL	CREB1	ENY2
	BPTF	CREB3L2	EPB41L4B
	BRCA2	CREB5	EPC1
	BRD1	CREBBP	EPC2
	BRD2	CREBL2	EPHB4
	BRD3	CREBZF	EPHX2
	BRD4	CREM	EPS15
	BRD7	CRIM1	ERBB4
	BRF1	CRLS1	ERC1
	BRF2	CRY1	ERCC3
	BRIP1	CSDE1	ERCC4
	BRIX1	CSGALNACT2	ERRFI1
	BRMS1L	CSNK1A1	ESCO2
	BRPF1	CSNK1D	ESD
	BRPF3	CSNK1E	ESF1
	BRSK1	CSNK1G2	ETFDH
	BRWD1	CSNK1G3	ETNK1
	BRWD3	CSNK2A1	ETS2
	BSN	CSNK2A2	ETV3
	BST1	CSPP1	ETV4
	BTAF1	CSTF1	EVI5
	BTBD1	CSTF2	EWSR1
	BTBD11	CTBP2	EXO1
	BTBD18	CTCF	EXOC5
	BTBD2	CTDSP1	EXOC6
	BTBD3	CTGF	EXOC6B
	BTBD7	CTH	EXOC8
	BTBD9	CTNNA1	EXOSC10
	BTC	CTNNAL1	EXOSC9
	BTF3	CTNND1	EYA1
	BTF3L4	CTTNBP2	EYA4
	BTG1	CUL1	EZR
	BTG4	CUL2	F2R
	BTK	CUL3	F2RL1
	BTLA	CUL5	F3
	BTN2A2	CUTC	FAM103A1
	BTNL8	CUX1	FAM104A
	BTRC	CXADR	FAM107B
	BUB1	CXCR4	FAM120A
	BUB1B	CYB5R3	FAM122A
	BUB3	CYLD	FAM126A
	BZRAP1	CYP20A1	FAM126B
	BZW1	CYP26A1	FAM129A
	BZW2	CYP2A7	FAM133B
	C10orf105	CYP2B6	FAM134A
	C10orf113	CYP2U1	FAM135A
	C10orf128	CYP3A4	FAM149A
	C10orf131	CYR61	FAM168B
	C10orf2	CYTH1	FAM172A
	C10orf53	CYTH3	FAM177A1
	C10orf55	DAB1	FAM179A
	C10orf88	DAB2	FAM19A5
	C11orf57	DACH1	FAM3C
	C11orf84	DAG1	FAM46A
	C11orf87	DAGLA	FAM53C
	C11orf88	DARS	FAM60A
	C11orf95	DAXX	FAM63B
	C12orf29	DBF4	FAM64A
	C12orf4	DBR1	FAM72B
	C12orf50	DBT	FAM76B
	C12orf66	DCBLD1	FAM84A
	C14orf105	DCC	FAM86B1
	C14orf119	DCK	FAM96A
	C14orf132	DCLRE1C	FAR1
	C14orf2	DCP1A	FAS
	C14orf37	DCP2	FASTKD1
	C14orf39	DCT	FAT1
	C14orf79	DCTN4	FAT3
	C15orf40	DCTN6	FAT4
	C15orf48	DCUN1D1	FBN1
	C15orf54	DCUN1D4	FBN2
	C15orf57	DDHD1	FBRS
	C15orf61	DDHD2	FBXL14
	C16orf45	DDIT3	FBXL16
	C16orf52	DDX10	FBXL17
	C16orf70	DDX17	FBXO11
	C16orf87	DDX18	FBXO21
	C17orf51	DDX21	FBXO25
	C17orf58	DDX24	FBXO3
	C17orf67	DDX31	FBXO30
	C17orf75	DDX3X	FBXO32
	C17orf77	DDX50	FBXO33
	C17orf78	DDX55	FBXO34
	C18orf21	DDX59	FBXO36
	C18orf25	DDX6	FBXO38
	C18orf54	DEAF1	FBXO45
	C19orf12	DEK	FBXO5
	C19orf43	DENND1C	FBXO8
	C19orf45	DENND4B	FBXW11
	C1D	DENND4C	FBXW2
	C1orf101	DENND5A	FCHO2
	C1orf109	DEPDC1B	FEM1C
	C1orf112	DEPDC5	FERMT2
	C1orf115	DEPDC7	FEZF1
	C1orf116	DFNA5	FGB
	C1orf198	DGAT1	FGD4
	C1orf21	DGKD	FGF13
	C1orf216	DGKE	FGF2
	C1orf226	DHRSX	FGF5
	C1orf52	DHX15	FGF9
	C1orf74	DHX32	FGFR1
	C1orf95	DHX33	FGFR1OP2
	C1QTNF6	DHX35	FGFR2
	C1QTNF7	DHX36	FGR
	C1RL	DIAPH1	FHDC1
	C1S	DIAPH3	FHL1
	C20orf197	DICER1	FIGN
	C21orf59	DIO3	FJX1
	C21orf91	DIP2B	FKBP5
	C2CD4C	DIP2C	FLNB
	C2orf42	DIS3	FLT1
	C2orf47	DIS3L2	FLT3LG
	C2orf49	DISC1	FLVCR1
	C2orf54	DKK1	FMN2
	C2orf69	DLAT	FMO1
	C2orf70	DLC1	FMR1
	C2orf78	DLD	FN1
	C2orf83	DLG1	FNBP1
	C3orf33	DLGAP4	FNBP1L
	C3orf35	DLGAP5	FNBP4
	C3orf52	DLL3	FNDC3A
	C3orf58	DLL4	FNDC3B
	C3orf67	DLX2	FNIP1
	C3orf70	DMXL1	FOXA1
	C4orf33	DNAH11	FOXF1
	C4orf46	DNAJA2	FOXF2
	C5orf15	DNAJA3	FOXK2
	C5orf22	DNAJB1	FOXM1
	C5orf24	DNAJB14	FOXN2
	C5orf28	DNAJB5	FOXN3
	C5orf30	DNAJC18	FOXO1
	C5orf34	DNAJC19	FOXO3
	C5orf42	DNAJC2	FOXP1
	C5orf56	DNAJC24	FOXP2
	C6orf1	DNAJC5	FPGT
	C6orf106	DNMBP	FRMD4B
	C6orf120	DNMT1	FRMD6
	C6orf132	DNMT3A	FRMPD4
	C6orf136	DNPEP	FRS2
	C6orf222	DOCK1	FSD1L
	C6orf58	DOCK2	FST
	C6orf62	DOCK4	FSTL1
	C6orf89	DOCK9	FUNDC1
	C7orf31	DOK2	FYN
	C7orf33	DONSON	FYTTD1
	C7orf57	DOPEY1	FZD3
	C7orf60	DPH3	FZD5
	C7orf65	DPY19L1	FZD6
	C8orf34	DPY19L2P1	FZD7
	C8orf46	DPY19L2P2	FZD8
	C8orf86	DPY19L4	GAB1
	C9orf114	DSC2	GABARAPL2
	C9orf152	DSC3	GABRB2
	C9orf170	DSE	GAD1
	C9orf47	DSG2	GALNT1
	C9orf66	DST	GAN
	C9orf78	DTWD1	GAS1
	C9orf84	DTWD2	GAS2L1
	C9orf85	DUOX1	GAS6
	C9orf91	DUSP1	GATA2
	CA1	DUSP11	GATA3
	CA10	DUSP16	GATA6
	CA13	DUSP18	GATAD1
	CA14	DUSP6	GBX2
	CA5B	DUSP8	GCA
	CA8	DYNC1I2	GCLC
	CAB39	DYNC1LI1	GCLM
	CAB39L	DYNC1LI2	GFPT1
	CABP1	DYNLT3	GIGYF1
	CABP4	DYRK1A	GIGYF2
	CABP7	DYRK2	GINS1
	CABYR	DYRK4	GIT1
	CACNA1B	DZIP1	GIT2
	CACNA1C	E2F3	GK5
	CACNA1E	E2F5	GKAP1
	CACNA1G	E2F6	GLCCI1
	CACNA2D1	E2F7	GLCE
	CACNA2D3	E2F8	GLI2
	CACNA2D4	EAPP	GLI3
	CACNB2	EBAG9	GLS
	CACNB4	EBF3	GM2A
	CACNG1	ECHDC2	GMCL1
	CACNG2	ECHS1	GNA13
	CACNG6	EDA	GNAI1
	CACNG7	EDEM1	GNAL
	CACNG8	EDEM3	GNB5
	CADM1	EDIL3	GNE
	CADM2	EDNRA	GNG10
	CADPS	EEA1	GNPDA2
	CADPS2	EED	GNPNAT1
	CAGE1	EEF1A2	GNPTAB
	CALB1	EEF2	GOLGA1
	CALCA	EFCAB9	GOLM1
	CALCB	EFNA1	GOLPH3
	CALCOCO2	EFNA5	GOLT1B
	CALCR	EFNB1	GOPC
	CALCRL	EFNB2	GORASP2
	CALD1	EFR3A	GPATCH2
	CALM1	EGFR	GPATCH8
	CALM2	EGLN1	GPM6B
	CALM3	EGR1	GPN3
	CALML4	EHMT1	GPR1
	CALN1	EI24	GPR161
	CALU	EIF1AX	GPRC5A
	CAMK1D	EIF2A	GPRIN3
	CAMK2A	EIF2AK3	GRAMD1B
	CAMK2D	EIF2B5	GRAMD1C
	CAMK2N1	EIF2S2	GRAMD4
	CAMK4	EIF2S3	GRB10
	CAMKK2	EIF3D	GRB2
	CAMKV	EIF3F	GRHL1
	CAMSAP1	EIF3J	GRIA3
	CAMTA1	EIF4A3	GRID1
	CAMTA2	EIF4E	GRIK2
	CAND1	EIF4ENIF1	GRTP1
	CANX	EIF4G2	GSK3A
	CAP1	EIF4G3	GSK3B
	CAP2	EIF5	GSPT1
	CAPN10	EIF5A2	GSTCD
	CAPN2	ELAVL1	GSTM3
	CAPN7	ELAVL4	GTF2A1
	CAPRIN1	ELF1	GTF2B
	CAPRIN2	ELF2	GTF3C3
	CAPS2	ELF3	GTPBP10
	CAPZA2	ELF4	GTPBP2
	CARD14	ELF5	GTSE1
	CARD8	ELK1	GUCY1A3
	CASC1	ELK4	GUCY1B3
	CASC4	ELL2	H1F0
	CASC5	ELMOD2	HBP1
	CASD1	ELP4	HCCS
	CASK	EML2	HCFC1
	CASKIN2	EML4	HCG11
	CASP10	EMP1	HDAC4
	CASP3	EMP2	HDAC9
	CASP4	EMX2	HEATR3
	CASP9	EN1	HEATR5A
	CASQ2	EN2	HEATR5B
	CASR	ENAH	HEBP2
	CAST	ENDOD1	HECA
	CASZ1	ENSA	HECTD1
	CAV1	ENTPD5	HECTD2
	CAV2	ENTPD7	HELZ
	CBFA2T2	ENY2	HERC3
	CBFA2T3	EP300	HERC4
	CBFB	EPB41L3	HERPUD1
	CBL	EPB41L4B	HESX1
	CBR4	EPC1	HHEX
	CBWD1	EPC2	HIF1A
	CBWD2	EPHB4	HIPK2
	CBWD3	EPHX2	HK2
	CBWD6	EPOR	HLX
	CBX3	EPRS	HMGA2
	CBX4	EPS15	HMGB1
	CBX5	ERBB4	HMGB2
	CBX8	ERC1	HMGB3
	CC2D1B	ERCC2	HMGCR
	CC2D2B	ERCC3	HMX2
	CCAR1	ERCC4	HNMT
	CCBL2	ERH	HNRNPA0
	CCDC102B	ERLIN1	HNRNPA1
	CCDC107	ERN1	HNRNPA2B1
	CCDC109B	ERRFI1	HNRNPA3P1
	CCDC110	ESCO2	HNRNPC
	CCDC117	ESD	HNRNPH3
	CCDC12	ESF1	HNRNPR
	CCDC120	ETAA1	HNRNPU
	CCDC125	ETFDH	HNRNPUL2
	CCDC126	ETNK1	HOMER1
	CCDC14	ETS2	HOXA10
	CCDC141	ETV3	HOXA11
	CCDC144A	ETV4	HOXA13
	CCDC144NL	EVI5	HOXA9
	CCDC149	EWSR1	HOXC11
	CCDC15	EXO1	HOXC13
	CCDC150	EXOC1	HOXC9
	CCDC158	EXOC2	HP1BP3
	CCDC163P	EXOC5	HS6ST2
	CCDC25	EXOC6	HSD17B12
	CCDC30	EXOC6B	HSD17B4
	CCDC36	EXOC8	HSF2
	CCDC43	EXOSC10	HSPA12A
	CCDC50	EXOSC9	HSPA13
	CCDC54	EYA1	HSPA14
	CCDC6	EYA4	HSPBAP1
	CCDC61	EZR	HSPD1
	CCDC62	F11R	HSPH1
	CCDC64	F13A1	HTR2A
	CCDC66	F2R	HTT
	CCDC68	F2RL1	IARS2
	CCDC73	F3	ICA1
	CCDC77	FAM101B	ICK
	CCDC82	FAM103A1	ID2
	CCDC85A	FAM104A	IDH3A
	CCDC85C	FAM107B	IDI1
	CCDC86	FAM117B	IER3IP1
	CCDC88A	FAM120A	IER5
	CCDC89	FAM122A	IFFO2
	CCDC97	FAM126A	IFI16
	CCIN	FAM126B	IFIT1
	CCL8	FAM127B	IFIT5
	CCNA2	FAM129A	IFNAR1
	CCNB1	FAM133B	IFNGR1
	CCNB2	FAM134A	IFNGR2
	CCND2	FAM135A	IFRD1
	CCNDBP1	FAM149A	IFT80
	CCNE2	FAM155A	IGF2BP2
	CCNG2	FAM168B	IGF2R
	CCNH	FAM172A	IKZF4
	CCNK	FAM175B	IL15
	CCNL1	FAM177A1	IL1R1
	CCNL2	FAM179A	IL1RAP
	CCNO	FAM19A5	ILKAP
	CCNT2	FAM21C	IMMP1L
	CCNY	FAM3C	IMPA1
	CCPG1	FAM46A	IMPAD1
	CCR1	FAM53C	ING3
	CCR5	FAM60A	INO80D
	CCR6	FAM63B	INPP4B
	CCRL2	FAM64A	INSIG1
	CCT6B	FAM65A	INSIG2
	CCT7	FAM72B	INSM1
	CCZ1	FAM76B	INSR
	CD109	FAM78B	INTS10
	CD163	FAM84A	INTS2
	CD164	FAM86B1	INTS6
	CD1D	FAM96A	INTS7
	CD200R1	FAM98A	IPMK
	CD209	FAM98B	IPO7
	CD226	FAR1	IQUB
	CD24	FARP1	IRAK1BP1
	CD247	FAS	IREB2
	CD28	FASTKD1	IRF1
	CD2AP	FASTKD3	IRF2
	CD300LG	FASTKD5	IRF2BP1
	CD302	FAT1	IRF2BP2
	CD34	FAT3	IRF6
	CD36	FAT4	IRS1
	CD37	FBN1	IRS2
	CD40	FBN2	IRX3
	CD44	FBRS	IRX5
	CD46	FBXL14	ISCU
	CD47	FBXL16	ITCH
	CD58	FBXL17	ITFG1
	CD59	FBXL3	ITGA2
	CD81	FBXO10	ITGA4
	CD82	FBXO11	ITGA6
	CD86	FBXO18	ITGB3BP
	CD8A	FBXO21	ITM2C
	CD9	FBXO25	ITPR1
	CD93	FBXO3	ITSN2
	CDC123	FBXO30	IVNS1ABP
	CDC14A	FBXO32	JAG1
	CDC14B	FBXO33	JAG2
	CDC14C	FBXO34	JAK2
	CDC16	FBXO36	JAZF1
	CDC27	FBXO38	JMJD1C
	CDC37L1	FBXO45	JRKL
	CDC40	FBXO5	JUN
	CDC42	FBXO8	KALRN
	CDC42BPA	FBXW11	KATNAL1
	CDC42BPB	FBXW2	KBTBD2
	CDC42EP3	FCER1A	KBTBD8
	CDC42SE2	FCHO2	KCMF1
	CDC5L	FDX1	KCNAB2
	CDC6	FEM1B	KCNG3
	CDC7	FEM1C	KCNJ4
	CDC73	FERMT2	KCNK1
	CDCA2	FEZF1	KCNQ5
	CDCA5	FGB	KCNT2
	CDCA7	FGD4	KCTD12
	CDCA8	FGF13	KCTD3
	CDH1	FGF2	KDELC2
	CDH10	FGF5	KEAP1
	CDH11	FGF9	KIAA0391
	CDH13	FGFR1	KIAA0907
	CDH17	FGFR1OP2	KIAA1109
	CDH18	FGFR2	KIAA1143
	CDH2	FGR	KIAA1147
	CDH22	FH	KIAA1217
	CDH26	FHDC1	KIAA1429
	CDH4	FHL1	KIAA1468
	CDH5	FHOD3	KIAA1586
	CDH6	FIGN	KIAA1715
	CDH7	FILIP1L	KIAA1804
	CDH8	FJX1	KIAA2026
	CDH9	FKBP3	KIF11
	CDK1	FKBP4	KIF16B
	CDK11A	FKBP5	KIF18A
	CDK12	FKBP7	KIF1B
	CDK13	FLNA	KIF20B
	CDK14	FLNB	KIF21A
	CDK17	FLT1	KIF3A
	CDK19	FLT3LG	KIT
	CDK5R1	FLVCR1	KITLG
	CDK5RAP1	FMN2	KLC1
	CDK5RAP2	FMO1	KLF10
	CDK6	FMO4	KLF12
	CDK7	FMR1	KLF13
	CDK8	FN1	KLF15
	CDKL1	FNBP1	KLF3
	CDKL2	FNBP1L	KLF4
	CDKN1A	FNBP4	KLF5
	CDKN1B	FNDC3A	KLF9
	CDKN1C	FNDC3B	KLHDC10
	CDKN2AIP	FNIP1	KLHL13
	CDKN2B	FOSL2	KLHL20
	CDKN3	FOXA1	KLHL23
	CDO1	FOXF1	KLHL28
	CDON	FOXF2	KLHL29
	CDR2	FOXK2	KLHL8
	CDS1	FOXM1	KPNA1
	CDS2	FOXN2	KPNA2
	CDX1	FOXN3	KPNA4
	CDYL2	FOXO1	KRIT1
	CEACAM7	FOXO3	KRR1
	CEBPB	FOXP1	KSR2
	CEBPD	FOXP2	L1CAM
	CEBPZ	FOXP4	L2HGDH
	CECR2	FOXRED1	L3MBTL3
	CELF1	FPGT	L3MBTL4
	CELF2	FRMD4B	LACTB2
	CELF3	FRMD6	LAMP2
	CELF4	FRMPD2	LANCL1
	CELF5	FRMPD4	LARP4
	CELF6	FRS2	LBR
	CELSR1	FSD1L	LCOR
	CELSR2	FST	LDOC1L
	CELSR3	FSTL1	LEMD3
	CENPA	FTH1	LENG8
	CENPBD1	FUNDC1	LEPROTL1
	CENPE	FUT11	LGR4
	CENPF	FXR2	LGR5
	CENPJ	FYN	LHX2
	CENPK	FYTTD1	LIFR
	CENPN	FZD3	LIG4
	CEP120	FZD5	LIMCH1
	CEP135	FZD6	LIN54
	CEP170	FZD7	LIN7C
	CEP192	FZD8	LIN9
	CEP290	GAB1	LIX1L
	CEP350	GABARAPL2	LMBR1
	CEP63	GABPA	LMBRD1
	CEP68	GABPB2	LMNB2
	CEP70	GABRB2	LMX1B
	CEP76	GAD1	LONP2
	CEP78	GADD45A	LONRF1
	CEPT1	GALNT1	LONRF2
	CERK	GAN	LONRF3
	CERKL	GARNL3	LPGAT1
	CES3	GART	LPP
	CFHR5	GAS1	LRIG2
	CFLAR	GAS2L1	LRP12
	CGGBP1	GAS2L3	LRP2
	CGNL1	GAS6	LRP5
	CH25H	GATA2	LRP8
	CHCHD1	GATA3	LRPPRC
	CHCHD7	GATA6	LRRC57
	CHD1	GATAD1	LRRC58
	CHD2	GBGT1	LRRFIP2
	CHD3	GBX2	LRRTM4
	CHD6	GCA	LSM1
	CHD7	GCLC	LSM14A
	CHD9	GCLM	LSM14B
	CHEK1	GCSH	LSM5
	CHEK2	GDE1	LTV1
	CHFR	GDI1	LUC7L
	CHIC1	GEN1	LUC7L2
	CHL1	GFM1	LYN
	CHM	GFPT1	LYPD6
	CHMP1A	GIGYF1	LYPLAL1
	CHMP1B	GIGYF2	LYRM7
	CHMP2B	GINS1	LYSMD3
	CHMP4C	GINS3	LZTFL1
	CHMP7	GIT1	LZTS2
	CHN2	GIT2	MADD
	CHODL	GK5	MAFG
	CHORDC1	GKAP1	MAK16
	CHP2	GLCCI1	MAL2
	CHPT1	GLCE	MALT1
	CHRAC1	GLI2	MAML1
	CHRD	GLI3	MAML2
	CHRM5	GLO1	MAML3
	CHRNB4	GLRX5	MAN1A1
	CHST1	GLS	MANBA
	CHST11	GLUL	MANEA
	CHST15	GM2A	MAP1B
	CHST3	GMCL1	MAP1LC3B
	CHST9	GMFB	MAP3K1
	CHSY1	GNA13	MAP3K4
	CHSY3	GNAI1	MAP4K3
	CHUK	GNAL	MAP7D3
	CHURC1	GNAQ	MAP9
	CIC	GNAS	MAPK6
	CILP	GNB5	MAPKAP1
	CISD1	GNE	MAPKAPK5
	CISD2	GNG10	MAPRE2
	CISD3	GNPDA2	MARCKS
	CIT	GNPNAT1	MARK4
	CITED1	GNPTAB	MASTL
	CKAP2	GOLGA1	MAT2B
	CKAP2L	GOLGA5	MAX
	CKAP5	GOLIM4	MBD5
	CKS2	GOLM1	MBIP
	CLASP1	GOLPH3	MBNL1
	CLASP2	GOLPH3L	MBNL2
	CLCA4	GOLT1B	MBNL3
	CLCN2	GOPC	MBTD1
	CLCN3	GORASP2	MCEE
	CLCN5	GPATCH2	MCM3
	CLCN6	GPATCH8	MCM4
	CLDN1	GPD2	MCM8
	CLDN10	GPHN	MCPH1
	CLDN11	GPM6B	MCRS1
	CLDN12	GPN3	MDGA2
	CLDN23	GPR1	MDM1
	CLDND1	GPR137	MDM2
	CLEC16A	GPR143	ME2
	CLEC1A	GPR161	MECP2
	CLEC2D	GPR89A	MED13
	CLEC3A	GPRC5A	MED13L
	CLEC4A	GPRIN3	MED14
	CLEC4D	GRAMD1B	MED17
	CLIC4	GRAMD1C	MED23
	CLINT1	GRAMD4	MED28
	CLIP1	GRB10	MED4
	CLIP4	GRB2	MEF2D
	CLK1	GRHL1	MEGF10
	CLK2	GRIA3	MEGF9
	CLK4	GRID1	MELK
	CLMN	GRIK2	MET
	CLN5	GRIK4	METTL10
	CLN8	GRTP1	METTL7A
	CLOCK	GSK3A	METTL8
	CLPTM1L	GSK3B	MFAP1
	CLPX	GSPT1	MFAP3
	CLSTN1	GSTCD	MFF
	CLSTN3	GSTK1	MFGE8
	CLTC	GSTM3	MFN1
	CLU	GTF2A1	MFSD8
	CLUL1	GTF2A1L	MGAT2
	CLVS1	GTF2B	MGAT3
	CLYBL	GTF2E1	MGAT4A
	CMIP	GTF3C3	MGEA5
	CMKLR1	GTF3C4	MIB1
	CMPK2	GTPBP1	MIER1
	CMTM4	GTPBP10	MIER3
	CMTM8	GTPBP2	MINA
	CNBP	GTSE1	MINPP1
	CNDP1	GUCY1A3	MIPOL1
	CNDP2	GUCY1B3	MITF
	CNGA1	GYG2	MKI67
	CNGA2	H1F0	MKL1
	CNGA3	H2AFV	MKL2
	CNIH3	H2AFY2	MKLN1
	CNIH4	H3F3B	MKNK2
	CNKSR2	HAGH	MLLT10
	CNKSR3	HAND1	MLLT4
	CNNM1	HAVCR2	MMAA
	CNNM4	HBEGF	MMGT1
	CNOT1	HBP1	MMP14
	CNOT10	HCCS	MMP15
	CNOT2	HCFC1	MN1
	CNOT6	HCG11	MND1
	CNOT6L	HDAC3	MNT
	CNOT7	HDAC4	MNX1
	CNOT8	HDAC9	MORC3
	CNPY3	HEATR3	MORF4L2
	CNR1	HEATR5A	MOSPD2
	CNRIP1	HEATR5B	MPHOSPH10
	CNTF	HEBP2	MPHOSPH6
	CNTFR	HECA	MPHOSPH8
	CNTLN	HECTD1	MPHOSPH9
	CNTN1	HECTD2	MPP5
	CNTN2	HELB	MPP6
	CNTN3	HELZ	MPP7
	CNTN4	HERC3	MPZL2
	CNTN5	HERC4	MREG
	CNTN6	HERPUD1	MRPL16
	CNTNAP1	HESX1	MRPL18
	CNTNAP2	HHEX	MRPL19
	CNTNAP3	HIBADH	MRPL22
	COBL	HIF1A	MRPL3
	COBLL1	HIPK2	MRPL30
	COCH	HIST1H2AC	MRPL34
	COG3	HK2	MRPL35
	COG6	HLA-DRB1	MRPL49
	COG7	HLX	MRPL50
	COIL	HMBS	MRPS18B
	COL12A1	HMGA2	MRPS22
	COL13A1	HMGB1	MRPS23
	COL14A1	HMGB2	MRPS26
	COL15A1	HMGB3	MRPS27
	COL17A1	HMGCR	MRPS35
	COL19A1	HMMR	MRPS36
	COL21A1	HMOX1	MSC
	COL24A1	HMX2	MSH2
	COL25A1	HNMT	MSI1
	COL28A1	HNRNPA0	MSI2
	COL3A1	HNRNPA1	MSX1
	COL4A3BP	HNRNPA2B1	MTA3
	COL4A4	HNRNPA3P1	MTAP
	COL4A5	HNRNPAB	MTDH
	COL4A6	HNRNPC	MTF1
	COL5A2	HNRNPF	MTF2
	COL5A3	HNRNPH3	MTM1
	COL6A3	HNRNPK	MTMR1
	COL6A4P1	HNRNPL	MTMR12
	COL6A5	HNRNPR	MTMR3
	COL8A1	HNRNPU	MTMR6
	COL9A2	HNRNPUL2	MTRF1
	COL9A3	HOMER1	MTUS1
	COLEC11	HORMAD1	MTX3
	COLEC12	HOXA10	MUC16
	COMMD10	HOXA11	MXD1
	COMMD2	HOXA13	MXI1
	COMMD3	HOXA5	MYB
	COMMD5	HOXA9	MYC
	COMMD6	HOXC11	MYCBP2
	COMMD7	HOXC13	MYO1E
	COMMD8	HOXC4	MYO5A
	COPS4	HOXC9	MYO5B
	COPZ1	HOXD13	MYO9A
	COQ10B	HP1BP3	MYSM1
	COQ7	HRC	MYT1
	COQ9	HRK	N4BP2L2
	CORIN	HS6ST2	NAALADL2
	CORO2A	HSD17B12	NAB1
	COX18	HSD17B4	NANP
	COX4I1	HSF2	NAP1L1
	COX6B2	HSF2BP	NAPB
	CP	HSPA12A	NASP
	CPD	HSPA13	NAT8L
	CPE	HSPA14	NBEA
	CPEB1	HSPA1B	NCAM1
	CPEB3	HSPBAP1	NCAPH
	CPEB4	HSPD1	NCBP2
	CPLX3	HSPH1	NCK1
	CPM	HTR2A	NCKAP1
	CPNE4	HTT	NCOA1
	CPNE8	HUNK	NCOA3
	CPPED1	IARS2	NCOA6
	CPSF2	ICA1	NCOA7
	CPSF4	ICK	NDC80
	CPSF6	ICMT	NDEL1
	CPT1A	ID2	NDFIP1
	CPZ	IDH3A	NDUFA12
	CR1	IDI1	NDUFS3
	CR2	IER3IP1	NDUFV2
	CRB1	IER5	NEK1
	CRBN	IFFO2	NEK2
	CREB1	IFI16	NEK3
	CREB3L1	IFI27	NEK7
	CREB3L2	IFIT1	NET1
	CREB5	IFIT5	NEXN
	CREBBP	IFNAR1	NF1
	CREBL2	IFNGR1	NFAT5
	CREBZF	IFNGR2	NFE2L2
	CREG2	IFRD1	NFIA
	CRELD2	IFT52	NFIL3
	CRHR2	IFT80	NFKBIA
	CRIM1	IGBP1	NFKBIZ
	CRISP2	IGF2BP2	NFS1
	CRISPLD1	IGF2R	NFYA
	CRISPLD2	IKBKG	NFYB
	CRKL	IKZF4	NGDN
	CRLF3	IL10RB	NHEJ1
	CRLS1	IL15	NHLRC2
	CRNKL1	IL16	NHS
	CROT	IL1R1	NIF3L1
	CRTAP	IL1RAP	NIN
	CRTC1	ILKAP	NINJ1
	CRTC3	IMMP1L	NIPA1
	CRX	IMMP2L	NIPA2
	CRY1	IMMT	NKRF
	CSAD	IMPA1	NKTR
	CSE1L	IMPAD1	NLGN1
	CSF2RB	ING3	NLGN2
	CSMD1	ING5	NLGN4X
	CSMD2	INO80D	NLK
	CSMD3	INPP4B	NOL8
	CSNK1D	INPP5E	NOLC1
	CSNK1E	INSIG1	NOTCH2
	CSNK1G3	INSIG2	NOV
	CSNK2A1	INSM1	NOVA1
	CSNK2A2	INSR	NPAT
	CSPG5	INTS10	NPC1
	CSPP1	INTS12	NPEPPS
	CSRNP3	INTS2	NPM3
	CSTF2	INTS5	NPNT
	CSTF3	INTS6	NPTX1
	CTAGE10P	INTS7	NR1D1
	CTAGE11P	INTS8	NR2C2
	CTAGE5	IPMK	NR2F2
	CTAGE9	IPO7	NR3C1
	CTBS	IQCE	NR4A1
	CTCF	IQGAP2	NR5A2
	CTDNEP1	IQSEC1	NRCAM
	CTDP1	IQUB	NRF1
	CTDSP1	IRAK1BP1	NRIP1
	CTDSPL	IREB2	NRP1
	CTDSPL2	IRF1	NRXN2
	CTF1	IRF2	NRXN3
	CTGF	IRF2BP1	NSL1
	CTHRC1	IRF2BP2	NT5DC3
	CTNNA3	IRF6	NTN4
	CTNNB1	IRS1	NUCKS1
	CTNNBIP1	IRS2	NUDCD1
	CTNND1	IRS4	NUDT10
	CTNND2	IRX3	NUDT12
	CTNS	IRX5	NUDT21
	CTPS2	ISCA1	NUDT3
	CTR9	ISCU	NUDT4
	CTSC	ITCH	NUF2
	CTSO	ITFG1	NUFIP2
	CTSZ	ITGA2	NUMB
	CTTNBP2	ITGA4	NUP153
	CTTNBP2NL	ITGA6	NUP160
	CTXN2	ITGB1	NUP54
	CTXN3	ITGB3BP	NUP93
	CUBN	ITM2C	NUP98
	CUL1	ITPR1	NUPL2
	CUL2	ITPRIPL2	NUS1
	CUL3	ITSN2	NUSAP1
	CUL4A	IVNS1ABP	NXF1
	CUL4B	IWS1	OAT
	CUL5	JAG1	OBFC1
	CUTC	JAG2	OCIAD1
	CUX1	JAK1	OGFRL1
	CWC22	JAK2	OIP5
	CWC27	JAZF1	ONECUT2
	CXADR	JMJD1C	OPA1
	CXCL10	JRKL	ORMDL1
	CXCL12	JUN	OSBPL10
	CXCL14	KALRN	OSBPL11
	CXCL5	KATNAL1	OSBPL6
	CXCR2	KBTBD2	OSBPL8
	CXCR2P1	KBTBD7	OSBPL9
	CXCR6	KBTBD8	OSGEPL1
	CXorf23	KCMF1	OSR2
	CXorf36	KCNAB2	OTUD1
	CXorf38	KCNG3	OTUD4
	CXorf56	KCNJ4	OTX1
	CXXC4	KCNK1	OXA1L
	CYB5B	KCNQ5	OXR1
	CYB5D2	KCNT2	PACRGL
	CYB5R4	KCTD12	PAFAH1B1
	CYCS	KCTD3	PAFAH1B2
	CYFIP1	KDELC2	PAG1
	CYLD	KEAP1	PAIP1
	CYP19A1	KHSRP	PAK1IP1
	CYP20A1	KIAA0319L	PAK2
	CYP24A1	KIAA0391	PALB2
	CYP26A1	KIAA0907	PALM2-AKAP2
	CYP26B1	KIAA1109	PAM
	CYP2B6	KIAA1143	PANK1
	CYP2R1	KIAA1147	PANK2
	CYP2U1	KIAA1217	PANK3
	CYP3A5	KIAA1429	PAPD4
	CYP4A11	KIAA1468	PAPD5
	CYP4A22	KIAA1586	PAPOLA
	CYP4F11	KIAA1715	PAPOLG
	CYP4F3	KIAA1804	PAQR3
	CYP51A1	KIAA2026	PARD3
	CYR61	KIF11	PARD3B
	CYSLTR1	KIF16B	PARD6B
	CYTH1	KIF18A	PARG
	CYTH3	KIF1B	PARP14
	CYTIP	KIF20B	PARP2
	CYYR1	KIF21A	PARP6
	DAAM1	KIF3A	PASK
	DAB2	KIF5A	PATL1
	DAB2IP	KIF5B	PAX9
	DACH1	KIF5C	PBX3
	DACH2	KIFC1	PCBP2
	DACT1	KIRREL3	PCDH11Y
	DACT3	KIT	PCDH7
	DAD1	KITLG	PCDH9
	DAGLA	KLC1	PCDHGA8
	DAPK1	KLF10	PCF11
	DAPP1	KLF12	PCGF3
	DBF4	KLF13	PCGF5
	DBF4B	KLF15	PCGF6
	DBIL5P	KLF3	PCM1
	DBR1	KLF4	PCNA
	DBT	KLF5	PCNP
	DBX2	KLF9	PCNT
	DCAF10	KLHDC10	PCSK2
	DCAF12	KLHDC9	PCSK5
	DCAF16	KLHL13	PDCD10
	DCAF17	KLHL15	PDCD2
	DCAF4	KLHL20	PDCD4
	DCAF4L1	KLHL23	PDCD7
	DCAF4L2	KLHL28	PDCL
	DCAF5	KLHL29	PDE10A
	DCAF7	KLHL36	PDE1A
	DCAF8L1	KLHL8	PDE5A
	DCBLD1	KLK7	PDE6D
	DCBLD2	KLRC4	PDE7A
	DCC	KLRK1	PDE7B
	DCDC5	KPNA1	PDE8B
	DCHS1	KPNA2	PDGFC
	DCK	KPNA4	PDGFRA
	DCLK1	KPNA5	PDHX
	DCLK2	KRIT1	PDIK1L
	DCLK3	KRR1	PDK4
	DCLRE1B	KSR2	PDLIM3
	DCLRE1C	L1CAM	PDLIM5
	DCP1A	L2HGDH	PDS5B
	DCP2	L3MBTL3	PDXK
	DCT	L3MBTL4	PDZD8
	DCTN5	LACTB2	PEA15
	DCUN1D1	LAMA4	PELI1
	DCUN1D3	LAMP2	PELI2
	DCUN1D4	LANCL1	PEX11B
	DCUN1D5	LARGE	PEX13
	DCX	LARP1	PEX14
	DDAH1	LARP4	PEX3
	DDHD1	LASP1	PFDN1
	DDHD2	LATS2	PFDN4
	DDIT3	LBR	PGAP1
	DDIT4L	LCOR	PGGT1B
	DDR1	LDOC1L	PGM2
	DDTL	LEMD3	PGRMC2
	DDX10	LENG8	PHACTR2
	DDX17	LEPROTL1	PHAX
	DDX18	LGR4	PHC2
	DDX20	LGR5	PHC3
	DDX21	LHFP	PHF10
	DDX23	LHX2	PHF12
	DDX3X	LIFR	PHF13
	DDX3Y	LIG4	PHF14
	DDX42	LIMCH1	PHF2
	DDX43	LIN28B	PHF20L1
	DDX46	LIN52	PHF23
	DDX5	LIN54	PHF3
	DDX50	LIN7C	PHF6
	DDX52	LIN9	PHLDA1
	DDX53	LIX1L	PIAS1
	DDX55	LMBR1	PIAS2
	DDX56	LMBRD1	PICALM
	DDX58	LMNB2	PIGM
	DDX59	LMX1B	PIK3AP1
	DDX6	LNX2	PIK3C2A
	DDX60	LOC728554	PIK3C3
	DDX60L	LONP2	PIK3CB
	DEAF1	LONRF1	PIM1
	DEGS1	LONRF2	PIM2
	DEK	LONRF3	PIP4K2A
	DENND1B	LPGAT1	PIP4K2B
	DENND3	LPP	PITPNB
	DENND4A	LRCH3	PITX2
	DENND4B	LRIG2	PJA2
	DENND4C	LRIG3	PKN2
	DENND5B	LRP12	PKNOX1
	DENR	LRP2	PLA2G12A
	DEPDC1	LRP5	PLA2R1
	DEPDC1B	LRP8	PLAG1
	DEPDC5	LRPPRC	PLEKHA1
	DEPDC7	LRRC57	PLEKHA5
	DEPTOR	LRRC58	PLEKHB2
	DERL1	LRRFIP2	PLK4
	DFFA	LRRTM4	PLS3
	DGAT1	LSM1	PLSCR1
	DGAT2	LSM14A	PLSCR4
	DGCR2	LSM14B	PLXNA2
	DGCR8	LSM5	PLXNA4
	DGKA	LSM6	PM20D2
	DGKB	LTBP3	PMAIP1
	DGKD	LTV1	PMP22
	DGKE	LUC7L	PMPCB
	DGKG	LUC7L2	PNMA1
	DGKH	LYAR	PNMA2
	DGKI	LYN	PNN
	DHDDS	LYPD6	PNPT1
	DHFR	LYPLAL1	PNRC1
	DHFRL1	LYRM7	PNRC2
	DHODH	LYSMD3	PODXL
	DHRS12	LZTFL1	POFUT1
	DHRS2	LZTS2	POGK
	DHRS4L2	MADD	POLD2
	DHTKD1	MAFG	POLH
	DHX32	MAGEF1	POLI
	DHX33	MAK16	POLK
	DHX35	MAL2	POLR1B
	DHX36	MALT1	POLR1C
	DHX57	MAML1	POLR2B
	DIAPH1	MAML2	POLR2F
	DIAPH2	MAML3	POLR2J
	DIAPH3	MAN1A1	POM121C
	DICER1	MAN1C1	POR
	DIDO1	MANBA	POU3F2
	DIO2	MANEA	POU4F2
	DIO3	MAP1B	PPA2
	DIP2A	MAP1LC3B	PPARGC1A
	DIP2B	MAP2K1	PPAT
	DIP2C	MAP3K1	PPFIA1
	DIRAS1	MAP3K4	PPFIBP1
	DIRAS2	MAP4K3	PPHLN1
	DIRC2	MAP7D3	PPIH
	DIS3	MAP9	PPM1A
	DIS3L	MAPK1	PPM1B
	DISC1	MAPK6	PPM1G
	DISP1	MAPKAP1	PPM1H
	DIXDC1	MAPKAPK2	PPM1K
	DKFZP434L187	MAPKAPK5	PPP1CB
	DKK1	MAPKBP1	PPP1CC
	DKK2	MAPRE1	PPP1R10
	DLAT	MAPRE2	PPP1R12A
	DLC1	MAPRE3	PPP1R14C
	DLD	MARCKS	PPP1R15B
	DLEU7	MARK4	PPP1R1C
	DLG1	MAST1	PPP1R3C
	DLG2	MASTL	PPP1R9B
	DLG3	MAT2B	PPP2CA
	DLGAP1	MATN2	PPP2R1B
	DLGAP2	MAX	PPP2R2A
	DLGAP4	MBD5	PPP2R2C
	DLGAP5	MBIP	PPP2R2D
	DLL1	MBNL1	PPP2R5A
	DLL3	MBNL2	PPP2R5C
	DLL4	MBNL3	PPP3R1
	DLX1	MBOAT2	PPP4R1
	DLX2	MBTD1	PPP6C
	DLX5	MCC	PPTC7
	DLX6	MCEE	PRDM10
	DMAP1	MCM3	PRDM8
	DMBT1	MCM4	PRDX6
	DMBX1	MCM8	PREPL
	DMC1	MCPH1	PRKAA1
	DMD	MCRS1	PRKACB
	DMPK	MDFIC	PRKAG2
	DMRT2	MDGA2	PRKAR1A
	DMRTC2	MDH1	PRKCA
	DMTF1	MDM1	PRKCD
	DMXL1	MDM2	PRKCE
	DMXL2	ME2	PRKD3
	DNA2	MECP2	PRKDC
	DNAH11	MED13	PRKG1
	DNAH12	MED13L	PRMT2
	DNAH14	MED14	PRNP
	DNAH3	MED17	PROM1
	DNAH5	MED23	PRPF18
	DNAH6	MED28	PRPF3
	DNAH8	MED4	PRPF39
	DNAH9	MED6	PRPF40A
	DNAJA2	MEF2D	PRR11
	DNAJA3	MEGF10	PRR12
	DNAJA4	MEGF9	PRRC1
	DNAJB1	MELK	PRRX1
	DNAJB12	MEMO1	PSD3
	DNAJB14	MET	PSEN1
	DNAJB4	METAP1	PSMA2
	DNAJB5	METTL10	PSMA4
	DNAJB7	METTL3	PSMC2
	DNAJB9	METTL7A	PSMD14
	DNAJC10	METTL8	PSMD7
	DNAJC13	MFAP1	PSMF1
	DNAJC15	MFAP3	PSMG1
	DNAJC16	MFF	PSMG2
	DNAJC19	MFGE8	PSPC1
	DNAJC2	MFHAS1	PSPH
	DNAJC21	MFN1	PTAR1
	DNAJC24	MFSD8	PTBP2
	DNAJC25-GNG10	MGAT2	PTCH1
	DNAJC3	MGAT3	PTCHD1
	DNAJC5	MGAT4A	PTEN
	DNAJC6	MGAT4B	PTER
	DNAJC8	MGEA5	PTGFRN
	DNAJC9	MIB1	PTK2B
	DNAL1	MIB2	PTP4A1
	DNM1L	MIER1	PTPN1
	DNM2	MIER3	PTPN13
	DNM3	MINA	PTPN14
	DNMBP	MINPP1	PTPN21
	DNTT	MIPOL1	PTPN6
	DNTTIP2	MITF	PTPRA
	DOCK1	MKI67	PTPRE
	DOCK10	MKL1	PTPRJ
	DOCK11	MKL2	PUM1
	DOCK2	MKLN1	PUM2
	DOCK3	MKNK2	PURA
	DOCK4	MKRN1	PURB
	DOCK5	MLLT10	PUS7
	DOCK6	MLLT4	PWP1
	DOCK7	MMAA	PWWP2A
	DOCK9	MMAB	PXDN
	DOK1	MMGT1	PXMP4
	DOK4	MMP14	PYGL
	DOK5	MMP15	QKI
	DOK6	MN1	QSER1
	DONSON	MND1	QSOX2
	DOPEY1	MNT	RAB10
	DPAGT1	MNX1	RAB11A
	DPH5	MOAP1	RAB11B
	DPM1	MON1B	RAB11FIP1
	DPP4	MORC2	RAB12
	DPY19L1	MORC3	RAB14
	DPY19L2	MORF4L2	RAB18
	DPY19L2P1	MOSPD2	RAB21
	DPY19L2P2	MOSPD3	RAB22A
	DPY19L3	MPHOSPH10	RAB27A
	DPY19L4	MPHOSPH6	RAB28
	DPY30	MPHOSPH8	RAB2A
	DPYS	MPHOSPH9	RAB2B
	DPYSL3	MPL	RAB31
	DRAM1	MPP5	RAB3GAP2
	DRD1	MPP6	RAB3IP
	DRD2	MPP7	RAB40C
	DROSHA	MPZL2	RAB5B
	DSC1	MREG	RAB6A
	DSC2	MRPL15	RAB6B
	DSC3	MRPL16	RABGAP1
	DSCAM	MRPL17	RABGEF1
	DSCAML1	MRPL18	RABGGTB
	DSCR3	MRPL19	RABL3
	DSE	MRPL22	RAD1
	DSEL	MRPL28	RAD17
	DSG1	MRPL3	RAD18
	DSG2	MRPL30	RAD21
	DSG3	MRPL34	RAD23B
	DST	MRPL35	RAD50
	DSTYK	MRPL39	RAD54B
	DTD1	MRPL44	RAI1
	DTL	MRPL49	RALBP1
	DTNA	MRPL50	RALGPS2
	DTWD1	MRPS16	RANBP2
	DTWD2	MRPS17	RAP1A
	DTX3	MRPS18A	RAP1B
	DTX4	MRPS18B	RAP1GDS1
	DUOXA2	MRPS22	RAP2C
	DUSP1	MRPS23	RAPGEF2
	DUSP11	MRPS25	RAPGEF4
	DUSP12	MRPS26	RAPGEF6
	DUSP16	MRPS27	RAPH1
	DUSP18	MRPS35	RASAL2
	DUSP19	MRPS36	RASGEF1B
	DUSP28	MRPS9	RASSF8
	DUSP4	MSC	RBAK
	DUSP6	MSH2	RBBP5
	DUSP8	MSH3	RBBP6
	DVL1	MSI1	RBBP8
	DYM	MSI2	RBM12B
	DYNC1H1	MSX1	RBM22
	DYNC1I2	MSX2	RBM23
	DYNC1LI2	MTA1	RBM25
	DYNC2LI1	MTA3	RBM26
	DYNLT3	MTAP	RBM27
	DYRK1A	MTBP	RBM28
	DYRK2	MTDH	RBM33
	DYRK3	MTF1	RBM39
	DYX1C1	MTF2	RBM5
	DZIP1	MTFR1	RBM7
	DZIP1L	MTHFD2	RBMS1
	DZIP3	MTHFS	RBMS2
	E2F3	MTM1	RBMX
	E2F5	MTMR1	RBPJ
	E2F6	MTMR12	RBPMS2
	E2F8	MTMR3	RC3H2
	E4F1	MTMR6	RCAN1
	EAF1	MTRF1	RCAN2
	EAPP	MTUS1	RCL1
	EBAG9	MTX3	RDH10
	EBF1	MUC16	RDH11
	EBF2	MXD1	REEP1
	EBF3	MXI1	REEP3
	ECHDC1	MYADM	REEP5
	ECM2	MYB	REL
	ECSCR	MYBPC3	RELL1
	ECT2	MYC	RERE
	ECT2L	MYCBP2	REST
	EDA	MYD88	REV1
	EDA2R	MYO15B	RFC3
	EDAR	MYO19	RFC4
	EDEM1	MYO1E	RFX2
	EDEM3	MYO5A	RGMA
	EDIL3	MYO5B	RGMB
	EDN2	MYO9A	RHBDD1
	EDNRA	MYSM1	RHEB
	EDNRB	MYT1	RHOF
	EEA1	N4BP2L2	RHOT1
	EED	NAALADL2	RHPN2
	EEF1E1	NAB1	RIC8B
	EEF2	NAF1	RICTOR
	EEF2K	NANP	RIF1
	EFCAB1	NAP1L1	RIMKLB
	EFCAB10	NAPB	RIOK1
	EFCAB5	NARS	RIOK2
	EFCAB7	NASP	RIT1
	EFEMP1	NAT1	RMND5A
	EFEMP2	NAT8L	RNF122
	EFHC1	NBEA	RNF125
	EFHC2	NBPF14	RNF128
	EFHD1	NBPF15	RNF13
	EFNA1	NCAM1	RNF138
	EFNA2	NCAPD2	RNF139
	EFNA5	NCAPD3	RNF149
	EFNB1	NCAPH	RNF169
	EFNB2	NCBP2	RNF180
	EFR3A	NCDN	RNF19A
	EFR3B	NCK1	RNF2
	EFTUD2	NCKAP1	RNF214
	EGF	NCL	RNF216
	EGFEM1P	NCOA1	RNF4
	EGFL6	NCOA3	RNF41
	EGFLAM	NCOA4	RNF44
	EGLN1	NCOA6	RNF6
	EGLN3	NCOA7	RNF8
	EGR1	NDC80	RNMT
	EGR2	NDEL1	RNPS1
	EGR3	NDFIP1	ROBO1
	EHBP1	NDUFA12	ROCK1
	EHF	NDUFB4	ROCK2
	EHHADH	NDUFC2	RP2
	EID1	NDUFS3	RPAIN
	EID2	NDUFV2	RPE
	EIF1AD	NEK1	RPGRIP1L
	EIF1AX	NEK2	RPL32P3
	EIF2AK1	NEK3	RPRD1A
	EIF2AK2	NEK7	RPRD1B
	EIF2AK3	NENF	RPRD2
	EIF2AK4	NET1	RPS29
	EIF2S1	NETO2	RPS3
	EIF3E	NEXN	RPS6KA3
	EIF3F	NF1	RPS6KA5
	EIF3G	NFAT5	RQCD1
	EIF3H	NFE2L2	RRM2B
	EIF3J	NFIA	RRN3
	EIF4A2	NFIL3	RRP15
	EIF4A3	NFKBIA	RSBN1
	EIF4B	NFKBIB	RSBN1L
	EIF4E	NFKBIZ	RSRC2
	EIF4E3	NFS1	RTN4
	EIF4ENIF1	NFYA	RUFY2
	EIF4G2	NFYB	RUNX1T1
	EIF4G3	NGDN	RWDD2A
	EIF5	NHEJ1	RWDD3
	EIF5A2	NHLRC2	RYBP
	EIF5AL1	NHS	SACM1L
	ELAC2	NIF3L1	SACS
	ELAVL1	NIN	SALL1
	ELAVL2	NINJ1	SAP18
	ELAVL3	NIP7	SAP30L
	ELF1	NIPA1	SASH1
	ELF2	NIPA2	SASS6
	ELF3	NISCH	SATB1
	ELK1	NKRF	SATB2
	ELK4	NKTR	SAV1
	ELL2	NLE1	SBF2
	ELMO1	NLGN1	SBNO1
	ELMO2	NLGN2	SCAMP1
	ELMOD1	NLGN4X	SCAPER
	ELMOD2	NLK	SCARB2
	ELOVL2	NLRP2	SCHIP1
	ELOVL4	NOL8	SCLT1
	ELOVL5	NOLC1	SCML1
	ELOVL6	NOMO2	SCML2
	ELOVL7	NOTCH2	SCN2A
	ELP2	NOV	SCRN1
	ELP4	NOVA1	SDC2
	EMB	NPAT	SDHD
	EMBP1	NPC1	SEC22B
	EMG1	NPEPPS	SEC23A
	EML1	NPM3	SEC24A
	EML4	NPNT	SEC24B
	EML5	NPTX1	SEC24D
	EMP1	NR1D1	SEC31A
	EMP2	NR2C2	SEC62
	EMX2	NR2F1	SEH1L
	EN1	NR2F2	SEL1L
	EN2	NR3C1	SEMA3C
	ENAH	NR4A1	SEMA3D
	ENAM	NR5A2	SEMA3E
	ENC1	NRCAM	SEMA4D
	ENOPH1	NRF1	SEMA6D
	ENOX2	NRIP1	SENP2
	ENPEP	NRP1	SENP6
	ENPP1	NRXN2	SEPHS1
	ENPP2	NRXN3	SEPSECS
	ENPP4	NSL1	SERAC1
	ENPP5	NSMCE2	SERBP1
	ENPP6	NT5DC1	SERINC1
	ENSA	NT5DC3	SERP1
	ENTHD1	NTN4	SERPINB5
	ENTPD1	NUCB2	SERPINB8
	ENTPD3	NUCKS1	SERPINH1
	ENTPD5	NUDCD1	SERTAD2
	ENTPD7	NUDCD2	SESTD1
	ENY2	NUDT10	SETD1A
	EOMES	NUDT12	SETD2
	EP400	NUDT21	SETD7
	EPAS1	NUDT3	SETX
	EPB41	NUDT4	SF3B1
	EPB41L1	NUDT7	SF3B2
	EPB41L2	NUF2	SF3B3
	EPB41L4A	NUFIP2	SFMBT2
	EPB41L4B	NUMB	SFRP1
	EPB41L5	NUP153	SFRP2
	EPC1	NUP160	SGCB
	EPC2	NUP205	SGK3
	EPCAM	NUP37	SGMS2
	EPGN	NUP50	SGOL1
	EPHA1	NUP54	SGPP1
	EPHA3	NUP93	SH2D3C
	EPHA4	NUP98	SH3BGRL
	EPHA5	NUPL2	SH3BGRL2
	EPHA7	NUS1	SH3BP5
	EPHA8	NUSAP1	SHC1
	EPHB1	NXF1	SHC3
	EPHB4	OAS2	SHISA3
	EPHX2	OAT	SHOC2
	EPM2AIP1	OBFC1	SIAH1
	EPS15	OCIAD1	SIN3A
	EPS15L1	OGFRL1	SIRT1
	EPS8	OIP5	SIX1
	EPT1	ONECUT2	SKI
	ERAP1	OPA1	SKP1
	ERAP2	OR1K1	SLBP
	ERBB4	ORMDL1	SLC12A7
	ERC1	ORMDL3	SLC16A1
	ERC2	OSBPL10	SLC16A14
	ERCC3	OSBPL11	SLC17A5
	ERCC4	OSBPL6	SLC19A2
	ERCC6	OSBPL8	SLC1A1
	ERCC6L	OSBPL9	SLC20A1
	EREG	OSGEPL1	SLC20A2
	ERI1	OSGIN2	SLC23A2
	ERI2	OSR2	SLC25A12
	ERLEC1	OSTM1	SLC25A21
	ERLIN2	OTUD1	SLC25A27
	ERMN	OTUD4	SLC25A32
	ERRFI1	OTUD6B	SLC25A37
	ESCO1	OTX1	SLC25A40
	ESCO2	OXA1L	SLC25A44
	ESD	OXR1	SLC26A2
	ESF1	P2RY6	SLC2A1
	ESM1	PA2G4	SLC2A12
	ESR1	PACRGL	SLC2A13
	ESRP1	PAFAH1B1	SLC30A5
	ESRRA	PAFAH1B2	SLC30A6
	ESRRB	PAG1	SLC30A7
	ESRRG	PAH	SLC30A9
	ESYT2	PAICS	SLC35A1
	ESYT3	PAIP1	SLC35A3
	ETF1	PAIP2	SLC35A5
	ETFB	PAK1IP1	SLC35E1
	ETFDH	PAK2	SLC35F2
	ETNK1	PAK3	SLC35F5
	ETNK2	PALB2	SLC37A3
	ETS1	PALM2-AKAP2	SLC38A1
	ETS2	PAM	SLC38A2
	ETV1	PANK1	SLC39A10
	ETV3	PANK2	SLC39A14
	ETV4	PANK3	SLC39A6
	ETV5	PANK4	SLC39A9
	EVI5	PAPD4	SLC41A2
	EVPLL	PAPD5	SLC44A5
	EWSR1	PAPOLA	SLC4A7
	EXD2	PAPOLG	SLC5A3
	EXO1	PAQR3	SLC5A8
	EXOC5	PARD3	SLC6A15
	EXOC6	PARD3B	SLC7A1
	EXOC6B	PARD6B	SLC7A11
	EXOC8	PARG	SLC7A14
	EXOG	PARP1	SLC7A2
	EXOSC10	PARP14	SLC7A6
	EXOSC9	PARP2	SLC9A2
	EXPH5	PARP6	SLC9A6
	EXTL2	PASK	SLC9A7
	EXTL3	PATL1	SLCO4C1
	EYA1	PAX3	SLK
	EYA4	PAX9	SLTM
	EYS	PBK	SLU7
	EZH1	PBX3	SMAD1
	EZR	PCBP1	SMAD2
	F11	PCBP2	SMAD4
	F2R	PCDH11Y	SMAD7
	F2RL1	PCDH7	SMAP1
	F2RL2	PCDH9	SMARCA2
	F3	PCDHA5	SMARCAD1
	F5	PCDHGA12	SMC1A
	F7	PCDHGA8	SMC3
	FA2H	PCF11	SMC6
	FAAH2	PCGF3	SMCHD1
	FABP2	PCGF5	SMNDC1
	FADS1	PCGF6	SMOC1
	FAF2	PCM1	SMPDL3A
	FAH	PCNA	SNAI2
	FAHD1	PCNP	SNAP23
	FAIM2	PCNT	SNAP29
	FAM102B	PCSK2	SNAPC1
	FAM103A1	PCSK5	SNCA
	FAM104A	PDCD10	SNRK
	FAM105A	PDCD2	SNRPB
	FAM107A	PDCD4	SNRPB2
	FAM107B	PDCD7	SNRPE
	FAM110B	PDCL	SNTB1
	FAM110C	PDCL2	SNTB2
	FAM111A	PDE10A	SNUPN
	FAM114A1	PDE1A	SNX10
	FAM117A	PDE5A	SNX12
	FAM120A	PDE6D	SNX13
	FAM120C	PDE7A	SNX16
	FAM122A	PDE7B	SNX2
	FAM122B	PDE8B	SNX25
	FAM124A	PDGFC	SNX30
	FAM126A	PDGFRA	SNX4
	FAM126B	PDGFRL	SNX9
	FAM127A	PDHX	SOCS4
	FAM129A	PDIA6	SOCS5
	FAM133A	PDIK1L	SOCS6
	FAM133B	PDK4	SON
	FAM134A	PDLIM3	SORBS1
	FAM135A	PDLIM5	SORBS2
	FAM136A	PDS5B	SORCS1
	FAM13A	PDXK	SORCS3
	FAM13B	PDZD8	SORT1
	FAM13C	PEA15	SOS2
	FAM149A	PELI1	SOX6
	FAM149B1	PELI2	SOX9
	FAM150A	PEX11B	SP1
	FAM150B	PEX13	SP3
	FAM151B	PEX14	SP4
	FAM160B1	PEX3	SPAG1
	FAM161A	PEX5	SPAG16
	FAM161B	PFDN1	SPAST
	FAM162A	PFDN4	SPATA13
	FAM163A	PFDN5	SPATA6
	FAM167A	PFDN6	SPC25
	FAM168B	PFKM	SPCS1
	FAM169A	PFN2	SPCS3
	FAM171A1	PGAM1	SPECC1L
	FAM171B	PGAP1	SPIN1
	FAM172A	PGGT1B	SPIRE1
	FAM173B	PGM2	SPIRE2
	FAM174A	PGRMC2	SPRED2
	FAM177A1	PHACTR2	SPRY1
	FAM179A	PHACTR3	SPRY2
	FAM179B	PHAX	SPTBN1
	FAM184A	PHC2	SPTLC1
	FAM185A	PHC3	SPTLC2
	FAM186A	PHF1	SQLE
	FAM188A	PHF10	SRD5A1
	FAM196A	PHF12	SREBF1
	FAM198B	PHF13	SRFBP1
	FAM199X	PHF14	SRGAP1
	FAM19A2	PHF2	SRI
	FAM19A4	PHF20L1	SRRM1
	FAM19A5	PHF21A	SS18L1
	FAM200B	PHF23	SS18L2
	FAM201A	PHF3	SSBP1
	FAM20B	PHF6	SSBP2
	FAM26E	PHF8	SSTR1
	FAM26F	PHLDA1	SSX2IP
	FAM32A	PHTF1	ST18
	FAM35A	PI4K2A	ST7L
	FAM3C	PIAS1	ST8SIA4
[truncated: 4,904 more rows]
