# Supplementary material
Source: HighWire-hosted journal article supplement (doi:10.1101/rna.078436.120)
Supplement: Supplemental_Table_S4.xlsx [file Supplemental_Table_S4.xlsx]

## Sheet: Oligos
Enwerem et al. Supplemental Table S4
Oligonucleotides
Name	Sequence	Purpose	Section
IE128	5' GAG AGG TCT TTG AAC AAA CTG GTT TTG ATA TC 3	site directed mutagenesis DCP2 E148Q	Plasmids and cloning
IE129	5' GAT ATC AAA ACC AGT TTG TTC AAA GAC CTC TC	site directed mutagenesis DCP2 E148Q	Plasmids and cloning
IE133	5' GCT TCA CCA GCA CTC AGA GCA GCT TGT ACA GG	site directed mutagenesis PUM1 T1035S	Plasmids and cloning
IE134	5' CCT GTA CAA GCT GCT CTG AGT GCT GGT GAA GC	site directed mutagenesis PUM1 T1035S	Plasmids and cloning
IE135	5' GCC AGG CCA GTG GAA GAT CGT CAT GC	site directed mutagenesis PUM1 R1139W	Plasmids and cloning
IE136	5' GCA TGA CGA TCT TCC ACT GGC CTG GC	site directed mutagenesis PUM1 R1139W	Plasmids and cloning
IE137	5' CAT GCA TAA GAT CTG GCC CCA CAT CGC	site directed mutagenesis PUM1 R1147W	Plasmids and cloning
IE138	5' GCG ATG TGG GGC CAG ATC TTA TGC ATG	site directed mutagenesis PUM1 R1147W	Plasmids and cloning
IE120	5' CCT CAG TAT TAC GGC GTT CCA GGA GGG GTG TAT CCA GCC AAC	site directed mutagenesis PUM2 W350G	Plasmids and cloning
IE121	5' GTT GGC TGG ATA CAC CCC TCC TGG AAC GCC GTA ATA CTG AGG TGG	site directed mutagenesis PUM2 W350G	Plasmids and cloning
IE43	5' CCAGTATTATGGAGTTACTCCCggaGGAGTCTACCCTGCCAG	site directed mutagenesis PUM1 W466G	Plasmids and cloning
IE44	5' CTGGCAGGGTAGACTCCtccGGGAGTAACTCCATAATACTGG	site directed mutagenesis PUM1 W466G	Plasmids and cloning
18S Forward	5' CAGCCACCCGAGATTGAGCA	18S qPCR (control) Forward	qPCR
18S Reverse	5' TAGTAGCGACGGGCGGTGTG	18S qPCR (control) Reverse; Northern 18S probe	qPCR; Northern probe
RC318	5' GTCCTGAGCGGTGAAAATGG	NLUC qPCR Forward	qPCR
RC319	5' CGTAACCCCGTCGATTACCA	NLUC qPCR Reverse	qPCR
IE177	5' TCT CCT CGG TCT CGA TTC TAC GGT TTA AAC GAA TTC GGG CTC G	inverse PCR addition of V5 tag	Plasmids and cloning
IE178	5' GGG TTA GGG ATA GGC TTA CCG TAG ATG CCG GAG TTT GCT GCG	inverse PCR addition of V5 tag	Plasmids and cloning
IE179	5' TCT CCT CGG TCT CGA TTC TAC GAT GCC AGC GGC AAC TGT AG	inverse PCR addition of V5 tag	Plasmids and cloning
IE180	5' GGG TTA GGG ATA GGC TTA CCG GCG ATC GAG TAG ATG CCG G	inverse PCR addition of V5 tag	Plasmids and cloning

## Sheet: SiRNA
SiRNAs	Dharmacon Ontarget Smartpool
Target	Catalog number
PUM1	L-014179-00
PUM2	L-014031-02
CNOT1	L-015369-01
CNOT2	L-020313-02
CNOT3	L-020319-00
CNOT6	L-019101-00
CNOT6L	L-016411-00
CNOT7	L-012897-00
CNOT8	L-018791-00
CNOT9	L-019972-00
CNOT10	L-013968-02
CNOT11	L-020951-02
EDC4	L-016635-00
DDX6	L-006371-00
Non-targeting control	D-001810-10
