# Supplementary material
Source: HighWire-hosted journal article supplement (doi:10.1101/rna.078436.120)
Supplement: Supplemental_Table_S5.xlsx [file Supplemental_Table_S5.xlsx]

## Sheet: Sheet1
Enwerem et al. Supplemental Table S5
REAGENT or RESOURCE	SOURCE	IDENTIFIER
Antibodies
V5	Invitrogen	R960-25
MS2	Sigma-Aldrich	ABE76
HT	Promega	G9211
Myc	Cell Signaling Technologies (CST)	2278S
CNOT1	CST	44613S
CNOT2	CST	34214S
CNOT3	CST	13300S
CNOT6	CST	13415S
CNOT7	CST	86665S
CNOT9	Abcam	ab173563
CNOT10	Sigma-Aldrich	HPA041450
CNOT11	Sigma-Aldrich	HPA069823
DDX6	Bethyl Labs	A300-461A
EDC4	CST	2548S
Goat anti-Mouse HRP	Thermo-Fisher	31430
Goat anti-Rabbit HRP	CST	7074
Pumilio 1	Bohn et al, 2018
Pumilio 2	Abcam	ab92390
Tubulin	CST	3873S
GAPDH	Fisher	AM4300
Histone H3	CST	4499S
Deposited Data
GSE159510	Gene Expression Omnibus
Experimental Models: Cell Lines
Human: HCT116 cells	ATCC	CCL-247
Oligonucleotides
Primers for cloning DCP2 E148Q, PUM1 disease mutants, PUM1 and PUM2 cap binding mutants, see Table S4	This paper	N/A
Primers for cloning V5 tag into tethered control constructs, see Table S4	This paper	N/A
Primers for 18S qPCR and Northern 18S probe, see Table S4	This paper	N/A
Primers for NLUC qPCR, see Table S4
siRNA targeting sequences: see Table S4	Dharmacon
Recombinant DNA
psiCHECK 3x UGG	Van Etten et al. 2012
pGL 4.13 FF	Promega	E6681
pFN21A HT control	Van Etten et al. 2012
pFN21A PUM1 R6as FL	Van Etten et al. 2012
pFN21A PUM2 R6as FL	Van Etten et al. 2012
pFN21A PUM1 R6as RBD	Weidmann et al. 2014
pFN21A PUM2 R6as RBD	Weidmann et al. 2014
pFN21A PUM1 R6as FL W466G	This paper
pFN21A PUM2 R6as FL W350G	This paper
pFN21A HT MS2 V5	This paper
pFN21A HT MS2 V5 CNOT7	This paper
pF5K MS2 V5 PUM1 N	This paper
pF5K MS2 V5 PUM1 RD1	This paper
pF5K MS2 V5 PUM1 RD2	This paper
pF5K MS2 V5 PUM1 RD3	This paper
pF5K MS2 V5 PUM2 N	This paper
pF5K MS2 V5 PUM2 RD2	This paper
pF5K MS2 V5 PUM2 RD3	This paper
pNLP 4xMS2 pA	Abshire et al. 2018
pNLP 4xMS2 MALAT1	Abshire et al. 2018
pFN21A CNOT7mut (D40A, E42A)	Van Etten et al. 2012
pFN21A CNOT8mut (D40A, E42A)	Van Etten et al. 2012
pNLP 3xPRE	This paper
pNLP 3xPREmt (3xACA)	This paper
pF5A	Promega
pcDNA3.1 HA	Addgene
pcDNA myc DCP2 mut (E148Q)	This paper
pFN21A V5 CNOT8	This paper
pFN21A PUM1 R6as FL T1035S	This paper
pFN21A PUM1 R6as RBD T1035S	This paper
pFN21A PUM1 R6as FL R1139W	This paper
pFN21A PUM1 R6as RBD R1139W	This paper
pFN21A PUM1 R6as FL R1147W	This paper
pFN21A PUM1 R6as RBD R1147W	This paper
pnYC-NpM PUM1 RD1 (aa 1-149)	This paper
pnYC-NpM PUM1 RD2 (aa 309-459)	This paper
pnYC-NpM PUM1 RD3 (aa 589-827)	This paper
pnYC-NpM PUM1 RBD (aa 828-1175)	This paper
pnYC-NpM PUM2 RD2 (aa 186-344)	This paper
pnYC-NpM PUM2 RD3 (aa 471-704)	This paper
pnYC-NpM PUM2 RBD (aa 705-1049)	This paper
